# Supplementary material for: Transcriptomic profile of the mice aging lung is associated with inflammation and apoptosis as important pathways
Source: Aging (Albany NY). 2021 May 12;13(9):12378–94. doi: 10.18632/aging.203039 (PMC8148450; doi:10.18632/aging.203039)
Supplement: Supplementary Table 1 [file aging-13-203039-s002.xlsx]

## Sheet: WT_old_sal - WT_young_v2_sal - 
Supplementary Table 1. Age related mRNA.
PROBEID	ENSEMBL	SYMBOL	GENENAME	logFC	adj.P.Val
17439830	ENSMUSG00000029304	Spp1	secreted phosphoprotein 1	3.30963	7.95816e-09
17458439	ENSMUSG00000029816	Gpnmb	glycoprotein (transmembrane) nmb	3.26928	7.16219e-08
17491193	ENSMUSG00000040026	Saa3	serum amyloid A 3	3.23834	0.0082247
17426365	ENSMUSG00000028364	Tnc	tenascin C	3.23276	0.0006452
17514495	ENSMUSG00000049723	Mmp12	matrix metallopeptidase 12	3.19529	5.34457e-05
17407412	ENSMUSG00000050359	Sprr1a	small proline-rich protein 1A	2.95131	0.000500878
17470616	ENSMUSG00000040552	C3ar1	complement component 3a receptor 1	2.91229	2.88949e-06
17462788	ENSMUSG00000023349	Clec4n	C-type lectin domain family 4, member n	2.81218	2.12936e-05
17239845	ENSMUSG00000019987	Arg1	arginase, liver	2.77359	6.39521e-05
17431607	ENSMUSG00000036905	C1qb	complement component 1, q subcomponent, beta polypeptide	2.70667	0.000241573
17230045	ENSMUSG00000073489	Ifi204	interferon activated gene 204	2.67879	0.000867623
17508850	ENSMUSG00000025044	Msr1	macrophage scavenger receptor 1	2.66263	3.72912e-08
17533713	ENSMUSG00000001131	Timp1	tissue inhibitor of metalloproteinase 1	2.63141	0.000464937
17523659	ENSMUSG00000079227	Ccr5	chemokine (C-C motif) receptor 5	2.57231	0.00014311
17266952	ENSMUSG00000019122	Ccl9	chemokine (C-C motif) ligand 9	2.52481	9.18389e-05
17487759	ENSMUSG00000052212	Cd177	CD177 antigen	2.48296	1.16876e-06
17362953	ENSMUSG00000024672	Ms4a7	membrane-spanning 4-domains, subfamily A, member 7	2.45708	5.87572e-06
17537081	ENSMUSG00000033777	Tlr13	toll-like receptor 13	2.44084	3.12158e-05
17461205	ENSMUSG00000030077	Chl1	cell adhesion molecule L1-like	2.36673	0.00251804
17471541	ENSMUSG00000079293	Clec7a	C-type lectin domain family 7, member a	2.36335	0.00116528
17338416	ENSMUSG00000023992	Trem2	triggering receptor expressed on myeloid cells 2	2.356	2.36976e-07
17254041	ENSMUSG00000035385	Ccl2	chemokine (C-C motif) ligand 2	2.35101	5.87572e-06
17408024	ENSMUSG00000015947	Fcgr1	Fc receptor, IgG, high affinity I	2.30519	2.68295e-05
17232731	NA	Rnu3a	U3A small nuclear RNA	2.30034	0.0289067
17435249	NA	Snord93	small nucleolar RNA, C/D box 93	2.29743	0.00185179
17362973	ENSMUSG00000024679	Ms4a6d	membrane-spanning 4-domains, subfamily A, member 6D	2.22105	0.00227323
17466228	ENSMUSG00000029915	Clec5a	C-type lectin domain family 5, member a	2.20057	7.40319e-05
17364111	ENSMUSG00000050370	Ch25h	cholesterol 25-hydroxylase	2.19354	0.000918645
17362941	ENSMUSG00000099398	Ms4a14	membrane-spanning 4-domains, subfamily A, member 14	2.18577	5.34457e-05
17266967	ENSMUSG00000000982	Ccl3	chemokine (C-C motif) ligand 3	2.13445	0.00162902
17514553	ENSMUSG00000005800	Mmp8	matrix metallopeptidase 8	2.12532	0.000222042
17483577	ENSMUSG00000108596	Itgam	integrin alpha M	2.10894	7.2961e-07
17483577	ENSMUSG00000030786	Itgam	integrin alpha M	2.10894	7.2961e-07
17334404	ENSMUSG00000077709	Snora64	small nucleolar RNA, H/ACA box 64	2.09122	0.0344945
17459196	ENSMUSG00000044162	Tnip3	TNFAIP3 interacting protein 3	2.07895	8.55351e-05
17264835	ENSMUSG00000018774	Cd68	CD68 antigen	2.07346	0.000120728
17431619	ENSMUSG00000036887	C1qa	complement component 1, q subcomponent, alpha polypeptide	2.05491	3.42392e-05
17431612	ENSMUSG00000036896	C1qc	complement component 1, q subcomponent, C chain	2.03319	0.0010237
17532569	ENSMUSG00000025804	Ccr1	chemokine (C-C motif) receptor 1	2.02258	0.00140445
17219199	ENSMUSG00000059089	Fcgr4	Fc receptor, IgG, low affinity IV	2.01885	5.34457e-05
17513976	ENSMUSG00000096037	n-R5s136	nuclear encoded rRNA 5S 136	2.00782	0.00609477
17514482	ENSMUSG00000050578	Mmp13	matrix metallopeptidase 13	1.99624	0.000116111
17337796	ENSMUSG00000023913	Pla2g7	phospholipase A2, group VII (platelet-activating factor acetylhydrolase, plasma)	1.9941	4.75471e-05
17439367	ENSMUSG00000023078	Cxcl13	chemokine (C-X-C motif) ligand 13	1.98816	0.0154805
17400365	ENSMUSG00000028111	Ctsk	cathepsin K	1.98517	4.86491e-05
17254289	ENSMUSG00000069792	Wfdc17	WAP four-disulfide core domain 17	1.98259	0.00169156
17492947	ENSMUSG00000052353	Cemip	cell migration inducing protein, hyaluronan binding	1.97222	0.000867623
17226327	ENSMUSG00000026390	Marco	macrophage receptor with collagenous structure	1.97205	8.55351e-05
17287827	ENSMUSG00000035493	Tgfbi	transforming growth factor, beta induced	1.95524	2.7604e-05
17266851	ENSMUSG00000069793	Slfn9	schlafen 9	1.94134	0.00131571
17325324	ENSMUSG00000059657	Stfa2l1	stefin A2 like 1	1.93227	0.000408381
17357640	ENSMUSG00000101389	Ms4a4a	membrane-spanning 4-domains, subfamily A, member 4A	1.9268	0.000211194
17463509	ENSMUSG00000053063	Clec12a	C-type lectin domain family 12, member a	1.92309	0.00111011
17254059	ENSMUSG00000035352	Ccl12	chemokine (C-C motif) ligand 12	1.90888	0.0100847
17230078	ENSMUSG00000026536	Ifi211	interferon activated gene 211	1.88627	7.10586e-05
17230078	ENSMUSG00000073489	Ifi204	interferon activated gene 204	1.88627	7.10586e-05
17283445	ENSMUSG00000021190	Lgmn	legumain	1.88336	5.34457e-05
17233210	ENSMUSG00000089672	Lilr4b	leukocyte immunoglobulin-like receptor, subfamily B, member 4B	1.84149	0.000106801
17449718	ENSMUSG00000034855	Cxcl10	chemokine (C-X-C motif) ligand 10	1.84101	0.00109475
17344064	ENSMUSG00000090231	Cfb	complement factor B	1.81903	0.00130527
17285867	ENSMUSG00000061615	Hist1h2ab	histone cluster 1, H2ab	1.81822	0.0336893
17453496	ENSMUSG00000047501	Cldn4	claudin 4	1.80521	2.7604e-05
17220526	ENSMUSG00000077571	Snora36b	small nucleolar RNA, H/ACA box 36B	1.80204	0.047215
17391834	ENSMUSG00000027322	Siglec1	sialic acid binding Ig-like lectin 1, sialoadhesin	1.79107	0.000877249
17233226	ENSMUSG00000062593	Lilrb4a	leukocyte immunoglobulin-like receptor, subfamily B, member 4A	1.78721	6.22195e-05
17306477	ENSMUSG00000022180	Slc7a8	solute carrier family 7 (cationic amino acid transporter, y+ system), member 8	1.78544	0.000249216
17405082	ENSMUSG00000027737	Slc7a11	solute carrier family 7 (cationic amino acid transporter, y+ system), member 11	1.77288	0.000120728
17230111	ENSMUSG00000054203	Ifi205	interferon activated gene 205	1.76554	0.0114619
17453819	ENSMUSG00000037411	Serpine1	serine (or cysteine) peptidase inhibitor, clade E, member 1	1.7606	5.34457e-05
17548238	ENSMUSG00000027533	Fabp5	fatty acid binding protein 5, epidermal	1.75081	0.00354717
17470580	ENSMUSG00000040613	Apobec1	apolipoprotein B mRNA editing enzyme, catalytic polypeptide 1	1.74898	9.18389e-05
17470627	ENSMUSG00000030142	Clec4e	C-type lectin domain family 4, member e	1.74711	0.00034549
17339013	ENSMUSG00000004730	Adgre1	adhesion G protein-coupled receptor E1	1.74391	9.55782e-05
17423577	ENSMUSG00000028238	Atp6v0d2	ATPase, H+ transporting, lysosomal V0 subunit D2	1.74384	0.00552036
17540154	ENSMUSG00000015340	Cybb	cytochrome b-245, beta polypeptide	1.74301	0.00159747
17286587	ENSMUSG00000021423	Ly86	lymphocyte antigen 86	1.74151	0.00180903
17452115	ENSMUSG00000066861	Oas1g	2'-5' oligoadenylate synthetase 1G	1.73878	0.00487159
17548717	ENSMUSG00000027533	Fabp5	fatty acid binding protein 5, epidermal	1.73048	0.00716925
17271733	ENSMUSG00000044811	Cd300c2	CD300C molecule 2	1.72733	5.34457e-05
17284426	NA	Ighm	immunoglobulin heavy constant mu	1.7271	0.00297892
17295278	ENSMUSG00000021665	Hexb	hexosaminidase B	1.72036	5.34457e-05
17476364	ENSMUSG00000030579	Tyrobp	TYRO protein tyrosine kinase binding protein	1.67816	6.39521e-05
17400375	ENSMUSG00000038642	Ctss	cathepsin S	1.67432	6.08253e-05
17285879	ENSMUSG00000049539	Hist1h1a	histone cluster 1, H1a	1.6622	0.000264439
17375503	ENSMUSG00000033213	AA467197	expressed sequence AA467197	1.66029	0.0120752
17229620	ENSMUSG00000059498	Fcgr3	Fc receptor, IgG, low affinity III	1.65671	1.9517e-05
17502573	ENSMUSG00000005413	Hmox1	heme oxygenase 1	1.65103	0.000264439
17462796	ENSMUSG00000030144	Clec4d	C-type lectin domain family 4, member d	1.63383	8.55351e-05
17337580	ENSMUSG00000090675	Olfr111	olfactory receptor 111	1.62622	0.0151891
17283549	ENSMUSG00000079017	Ifi27l2a	interferon, alpha-inducible protein 27 like 2A	1.62582	0.000840199
17389467	ENSMUSG00000074934	Grem1	gremlin 1, DAN family BMP antagonist	1.62154	0.00273508
17404821	ENSMUSG00000027715	Ccna2	cyclin A2	1.62017	0.000787751
17346150	ENSMUSG00000037095	Lrg1	leucine-rich alpha-2-glycoprotein 1	1.61417	0.00437598
17471550	ENSMUSG00000030162	Olr1	oxidized low density lipoprotein (lectin-like) receptor 1	1.60875	0.00153708
17266960	ENSMUSG00000018927	Ccl6	chemokine (C-C motif) ligand 6	1.60827	0.00446819
17357810	ENSMUSG00000046805	Mpeg1	macrophage expressed gene 1	1.60764	0.000616397
17548926	ENSMUSG00000062783	LOC101055758	component of Sp100-rs-like	1.60427	0.00175548
17548926	ENSMUSG00000062783	LOC100041903	proteinase-activated receptor 1-like	1.60427	0.00175548
17548926	ENSMUSG00000062783	Gm7609	predicted pseudogene 7609	1.60427	0.00175548
17548926	NA	Gm38510	predicted gene, 38510	1.60427	0.00175548
17548926	ENSMUSG00000062783	Gm2666	predicted gene 2666	1.60427	0.00175548
17548926	ENSMUSG00000062783	Gm15433	predicted pseudogene 15433	1.60427	0.00175548
17548926	ENSMUSG00000062783	Csprs	component of Sp100-rs	1.60427	0.00175548
17467269	ENSMUSG00000029919	Hpgds	hematopoietic prostaglandin D synthase	1.59661	3.12734e-05
17268909	ENSMUSG00000020914	Top2a	topoisomerase (DNA) II alpha	1.59048	0.00406617
17424608	ENSMUSG00000028459	Cd72	CD72 antigen	1.58919	8.55351e-05
17548236	ENSMUSG00000062783	LOC101055758	component of Sp100-rs-like	1.5882	0.00178608
17548924	ENSMUSG00000062783	LOC101055758	component of Sp100-rs-like	1.5882	0.00178608
17548236	ENSMUSG00000062783	LOC100041903	proteinase-activated receptor 1-like	1.5882	0.00178608
17548924	ENSMUSG00000062783	LOC100041903	proteinase-activated receptor 1-like	1.5882	0.00178608
17548236	ENSMUSG00000062783	Gm7609	predicted pseudogene 7609	1.5882	0.00178608
17548924	ENSMUSG00000062783	Gm7609	predicted pseudogene 7609	1.5882	0.00178608
17548236	NA	Gm38510	predicted gene, 38510	1.5882	0.00178608
17548924	NA	Gm38510	predicted gene, 38510	1.5882	0.00178608
17548236	ENSMUSG00000062783	Gm2666	predicted gene 2666	1.5882	0.00178608
17548924	ENSMUSG00000062783	Gm2666	predicted gene 2666	1.5882	0.00178608
17548236	ENSMUSG00000062783	Gm15433	predicted pseudogene 15433	1.5882	0.00178608
17548924	ENSMUSG00000062783	Gm15433	predicted pseudogene 15433	1.5882	0.00178608
17548236	ENSMUSG00000062783	Csprs	component of Sp100-rs	1.5882	0.00178608
17548924	ENSMUSG00000062783	Csprs	component of Sp100-rs	1.5882	0.00178608
17404402	ENSMUSG00000027699	Ect2	ect2 oncogene	1.58403	0.00769929
17324787	ENSMUSG00000079625	Tm4sf19	transmembrane 4 L six family member 19	1.58069	0.00101072
17229658	ENSMUSG00000058715	Fcer1g	Fc receptor, IgE, high affinity I, gamma polypeptide	1.56354	0.00422247
17224071	ENSMUSG00000026193	Fn1	fibronectin 1	1.56333	0.0157112
17497813	ENSMUSG00000025498	Irf7	interferon regulatory factor 7	1.55576	3.12158e-05
17498323	ENSMUSG00000037613	Tnfrsf23	tumor necrosis factor receptor superfamily, member 23	1.54511	0.000212776
17363470	ENSMUSG00000058624	Gda	guanine deaminase	1.53648	0.000280667
17434555	ENSMUSG00000028970	Abcb1b	ATP-binding cassette, sub-family B (MDR/TAP), member 1B	1.53642	7.26092e-07
17229433	ENSMUSG00000026683	Nuf2	NUF2, NDC80 kinetochore complex component	1.53306	0.00635226
17437198	ENSMUSG00000029082	Bst1	bone marrow stromal cell antigen 1	1.52578	0.00038716
17495839	ENSMUSG00000035004	Igsf6	immunoglobulin superfamily, member 6	1.51994	0.00843155
17234803	ENSMUSG00000005054	Cstb	cystatin B	1.51965	0.000264439
17214197	ENSMUSG00000026177	Slc11a1	solute carrier family 11 (proton-coupled divalent metal ion transporters), member 1	1.5144	5.34457e-05
17374488	ENSMUSG00000040152	Thbs1	thrombospondin 1	1.51098	0.0273008
17508025	ENSMUSG00000037725	Ckap2	cytoskeleton associated protein 2	1.51049	0.00143902
17305143	ENSMUSG00000021803	Cdhr1	cadherin-related family member 1	1.50625	0.000120728
17439029	ENSMUSG00000029378	Areg	amphiregulin	1.50178	9.18389e-05
17230034	ENSMUSG00000073490	Ifi207	interferon activated gene 207	1.49418	0.000571628
17503937	ENSMUSG00000031762	Mt2	metallothionein 2	1.49079	0.00149001
17285586	ENSMUSG00000021322	Aoah	acyloxyacyl hydrolase	1.48705	0.00014311
17419437	ENSMUSG00000056529	Ptafr	platelet-activating factor receptor	1.47942	0.000265405
17524969	ENSMUSG00000036777	Anln	anillin, actin binding protein	1.47132	0.00539602
17522555	ENSMUSG00000032496	Ltf	lactotransferrin	1.46706	0.00288626
17464950	ENSMUSG00000029553	Tfec	transcription factor EC	1.46625	0.00130527
17493683	ENSMUSG00000065822	Snord15a	small nucleolar RNA, C/D box 15A	1.45955	0.0354838
17278328	ENSMUSG00000021091	Serpina3n	serine (or cysteine) peptidase inhibitor, clade A, member 3N	1.45198	0.0241255
17335467	ENSMUSG00000023067	Cdkn1a	cyclin-dependent kinase inhibitor 1A (P21)	1.45192	0.0392104
17399823	ENSMUSG00000056054	S100a8	S100 calcium binding protein A8 (calgranulin A)	1.45109	0.023206
17297537	ENSMUSG00000021822	Plau	plasminogen activator, urokinase	1.44869	8.55351e-05
17325861	ENSMUSG00000022667	Cd200r1	CD200 receptor 1	1.44428	0.000555056
17296558	ENSMUSG00000095609	Gm21188	predicted gene, 21188	1.43796	5.34457e-05
17367686	ENSMUSG00000026981	Il1rn	interleukin 1 receptor antagonist	1.4302	8.55351e-05
17239751	ENSMUSG00000070063	Snora33	small nucleolar RNA, H/ACA box 33	1.42226	0.0212377
17254176	ENSMUSG00000000204	Slfn4	schlafen 4	1.42099	0.000364815
17535774	ENSMUSG00000064981	Snora70	small nucleolar RNA, H/ACA box 70	1.41764	0.0192585
17293706	ENSMUSG00000021477	Ctsl	cathepsin L	1.41662	6.85427e-05
17260761	ENSMUSG00000020120	Plek	pleckstrin	1.41217	0.00020369
17312829	ENSMUSG00000068220	Lgals1	lectin, galactose binding, soluble 1	1.40521	0.00168423
17524930	ENSMUSG00000001348	Acp5	acid phosphatase 5, tartrate resistant	1.40289	0.000288655
17316754	ENSMUSG00000022305	Lrp12	low density lipoprotein-related protein 12	1.40037	0.000135864
17299329	ENSMUSG00000050335	Lgals3	lectin, galactose binding, soluble 3	1.39995	4.86491e-05
17393868	ENSMUSG00000074622	Mafb	v-maf musculoaponeurotic fibrosarcoma oncogene family, protein B (avian)	1.39427	0.000235958
17352985	ENSMUSG00000056124	B4galt6	UDP-Gal:betaGlcNAc beta 1,4-galactosyltransferase, polypeptide 6	1.38871	6.2272e-05
17548965	ENSMUSG00000062783	LOC101055758	component of Sp100-rs-like	1.38518	0.017951
17548965	ENSMUSG00000062783	LOC100041903	proteinase-activated receptor 1-like	1.38518	0.017951
17548965	ENSMUSG00000062783	Gm7609	predicted pseudogene 7609	1.38518	0.017951
17548965	NA	Gm38510	predicted gene, 38510	1.38518	0.017951
17548965	ENSMUSG00000062783	Gm2666	predicted gene 2666	1.38518	0.017951
17548965	ENSMUSG00000062783	Gm15433	predicted pseudogene 15433	1.38518	0.017951
17548965	ENSMUSG00000062783	Csprs	component of Sp100-rs	1.38518	0.017951
17291881	ENSMUSG00000039109	F13a1	coagulation factor XIII, A1 subunit	1.3802	0.000747911
17358266	ENSMUSG00000048572	Tmem252	transmembrane protein 252	1.37853	0.00410386
17423665	ENSMUSG00000028259	Fhl5	four and a half LIM domains 5	1.37729	0.0061973
17254047	ENSMUSG00000035373	Ccl7	chemokine (C-C motif) ligand 7	1.37642	0.000884448
17523650	ENSMUSG00000049103	Ccr2	chemokine (C-C motif) receptor 2	1.37581	0.000247299
17395079	ENSMUSG00000027514	Zbp1	Z-DNA binding protein 1	1.37544	0.00192065
17241692	ENSMUSG00000019942	Cdk1	cyclin-dependent kinase 1	1.37366	0.00344313
17520171	ENSMUSG00000089929	Bcl2a1b	B cell leukemia/lymphoma 2 related protein A1b	1.36189	0.00130527
17520171	ENSMUSG00000102037	Bcl2a1a	B cell leukemia/lymphoma 2 related protein A1a	1.36189	0.00130527
17528586	ENSMUSG00000032218	Ccnb2	cyclin B2	1.36163	0.00516404
17301213	ENSMUSG00000021939	Ctsb	cathepsin B	1.35814	0.00318243
17219418	ENSMUSG00000038147	Cd84	CD84 antigen	1.35803	0.000249216
17509139	ENSMUSG00000050914	Ankrd37	ankyrin repeat domain 37	1.3537	0.000244251
17315891	ENSMUSG00000003882	Il7r	interleukin 7 receptor	1.34926	0.00198694
17364114	ENSMUSG00000024781	Lipa	lysosomal acid lipase A	1.34917	0.0413872
17549186	ENSMUSG00000069793	Slfn9	schlafen 9	1.34221	5.34457e-05
17549186	ENSMUSG00000035208	Slfn8	schlafen 8	1.34221	5.34457e-05
17549186	ENSMUSG00000072621	Slfn10-ps	schlafen 10, pseudogene	1.34221	5.34457e-05
17498099	ENSMUSG00000007891	Ctsd	cathepsin D	1.34195	2.71942e-05
17398485	ENSMUSG00000033860	Fgg	fibrinogen gamma chain	1.34013	0.0275476
17390810	ENSMUSG00000027199	Gatm	glycine amidinotransferase (L-arginine:glycine amidinotransferase)	1.34	0.00116528
17277794	ENSMUSG00000021886	Gpr65	G-protein coupled receptor 65	1.33058	0.000555056
17471146	ENSMUSG00000107623	Gm10415	predicted gene 10415	1.32357	0.00162447
17546101	ENSMUSG00000040522	Tlr8	toll-like receptor 8	1.32043	0.000867623
17404217	ENSMUSG00000095788	Sirpb1a	signal-regulatory protein beta 1A	1.31779	0.0200282
17404217	ENSMUSG00000106923	LOC100038947	signal-regulatory protein beta 1-like	1.31779	0.0200282
17404217	ENSMUSG00000074677	LOC100038947	signal-regulatory protein beta 1-like	1.31779	0.0200282
17513672	ENSMUSG00000006519	Cyba	cytochrome b-245, alpha polypeptide	1.31582	5.62921e-05
17434023	ENSMUSG00000035692	Isg15	ISG15 ubiquitin-like modifier	1.31438	0.004397
17318950	ENSMUSG00000071714	Csf2rb2	colony stimulating factor 2 receptor, beta 2, low-affinity (granulocyte-macrophage)	1.31272	0.00108035
17267454	ENSMUSG00000020493	Prr11	proline rich 11	1.30556	0.00252828
17217048	ENSMUSG00000052688	Rab7b	RAB7B, member RAS oncogene family	1.30355	0.000397941
17485673	ENSMUSG00000055541	Lair1	leukocyte-associated Ig-like receptor 1	1.29848	0.000112375
17287361	ENSMUSG00000021453	Gadd45g	growth arrest and DNA-damage-inducible 45 gamma	1.29717	0.00042259
17497334	ENSMUSG00000031004	Mki67	antigen identified by monoclonal antibody Ki 67	1.29707	0.0177291
17289527	ENSMUSG00000021624	Cd180	CD180 antigen	1.29128	0.00493363
17238594	ENSMUSG00000025351	Cd63	CD63 antigen	1.29095	0.00113084
17524206	NA	Scarna9	small Cajal body-specific RNA 9	1.28909	0.0454864
17383892	ENSMUSG00000026822	Lcn2	lipocalin 2	1.28731	0.0232161
17261865	ENSMUSG00000020326	Ccng1	cyclin G1	1.28401	0.0116123
17479575	ENSMUSG00000038943	Prc1	protein regulator of cytokinesis 1	1.28307	0.017951
17229767	ENSMUSG00000004707	Ly9	lymphocyte antigen 9	1.2815	6.08253e-05
17410845	ENSMUSG00000056025	Clca3a1	chloride channel accessory 3A1	1.27642	0.00460169
17498730	ENSMUSG00000013974	Mcemp1	mast cell expressed membrane protein 1	1.27476	0.000670691
17229607	ENSMUSG00000026656	Fcgr2b	Fc receptor, IgG, low affinity IIb	1.27057	0.000273403
17219546	ENSMUSG00000026548	Slamf9	SLAM family member 9	1.27002	0.00145856
17438969	ENSMUSG00000029373	Pf4	platelet factor 4	1.26952	0.000277496
17450142	ENSMUSG00000035273	Hpse	heparanase	1.26603	0.000770943
17485510	ENSMUSG00000053338	Tarm1	T cell-interacting, activating receptor on myeloid cells 1	1.26586	0.000867623
17238558	ENSMUSG00000025355	Mmp19	matrix metallopeptidase 19	1.26286	0.0013495
17256784	ENSMUSG00000034947	Tmem106a	transmembrane protein 106A	1.26225	0.000211194
17295569	ENSMUSG00000078945	Naip2	NLR family, apoptosis inhibitory protein 2	1.26017	0.00158403
17325608	ENSMUSG00000075122	Cd80	CD80 antigen	1.25919	5.34457e-05
17429454	ENSMUSG00000028633	Ctps	cytidine 5'-triphosphate synthase	1.25812	0.000120728
17499212	ENSMUSG00000031443	F7	coagulation factor VII	1.25486	2.58119e-05
17414729	ENSMUSG00000039196	Orm1	orosomucoid 1	1.25377	0.0262984
17300279	ENSMUSG00000000957	Mmp14	matrix metallopeptidase 14 (membrane-inserted)	1.25279	0.0124843
17279404	ENSMUSG00000052160	Pld4	phospholipase D family, member 4	1.25183	0.00208541
17285691	ENSMUSG00000069303	Hist1h2br	histone cluster 1 H2br	1.24963	0.00288294
17285691	ENSMUSG00000069268	Hist1h2br	histone cluster 1 H2br	1.24963	0.00288294
17285691	ENSMUSG00000069307	Hist1h2bq	histone cluster 1, H2bq	1.24963	0.00288294
17285691	ENSMUSG00000069268	Hist1h2bq	histone cluster 1, H2bq	1.24963	0.00288294
17285691	ENSMUSG00000069308	Hist1h2bp	histone cluster 1, H2bp	1.24963	0.00288294
17285691	ENSMUSG00000095217	Hist1h2bn	histone cluster 1, H2bn	1.24963	0.00288294
17285691	ENSMUSG00000096807	Hist1h2bm	histone cluster 1, H2bm	1.24963	0.00288294
17285691	ENSMUSG00000094338	Hist1h2bl	histone cluster 1, H2bl	1.24963	0.00288294
17285691	ENSMUSG00000062727	Hist1h2bk	histone cluster 1, H2bk	1.24963	0.00288294
17285691	ENSMUSG00000069300	Hist1h2bj	histone cluster 1, H2bj	1.24963	0.00288294
17285691	ENSMUSG00000064168	Hist1h2bh	histone cluster 1, H2bh	1.24963	0.00288294
17285691	ENSMUSG00000058385	Hist1h2bg	histone cluster 1, H2bg	1.24963	0.00288294
17285691	ENSMUSG00000069268	Hist1h2bf	histone cluster 1, H2bf	1.24963	0.00288294
17285691	ENSMUSG00000047246	Hist1h2be	histone cluster 1, H2be	1.24963	0.00288294
17285691	ENSMUSG00000018102	Hist1h2bc	histone cluster 1, H2bc	1.24963	0.00288294
17285691	ENSMUSG00000075031	Hist1h2bb	histone cluster 1, H2bb	1.24963	0.00288294
17493869	ENSMUSG00000048779	P2ry6	pyrimidinergic receptor P2Y, G-protein coupled, 6	1.24821	0.00108035
17353663	ENSMUSG00000024349	Tmem173	transmembrane protein 173	1.24816	0.00487159
17234647	ENSMUSG00000000290	Itgb2	integrin beta 2	1.24767	0.00013088
17244057	ENSMUSG00000074802	Gas2l3	growth arrest-specific 2 like 3	1.24379	0.000209023
17514824	ENSMUSG00000031939	Taf1d	TATA-box binding protein associated factor, RNA polymerase I, D	1.24095	0.0380115
17404200	ENSMUSG00000095788	Sirpb1a	signal-regulatory protein beta 1A	1.23961	0.000460807
17501633	ENSMUSG00000015568	Lpl	lipoprotein lipase	1.23466	0.000294664
17398416	ENSMUSG00000028019	Pdgfc	platelet-derived growth factor, C polypeptide	1.22801	0.000461041
17363407	ENSMUSG00000024659	Anxa1	annexin A1	1.22727	0.0161858
17404209	ENSMUSG00000095028	Sirpb1b	signal-regulatory protein beta 1B	1.22252	0.00520444
17529575	ENSMUSG00000099974	Bcl2a1d	B cell leukemia/lymphoma 2 related protein A1d	1.21796	0.00153779
17529575	ENSMUSG00000089929	Bcl2a1b	B cell leukemia/lymphoma 2 related protein A1b	1.21796	0.00153779
17529575	ENSMUSG00000102037	Bcl2a1a	B cell leukemia/lymphoma 2 related protein A1a	1.21796	0.00153779
17358724	ENSMUSG00000024768	Lipf	lipase, gastric	1.21791	0.00014311
17271724	ENSMUSG00000034641	Cd300ld	CD300 molecule like family member d	1.21702	0.0160685
17462729	ENSMUSG00000049037	Clec4a1	C-type lectin domain family 4, member a1	1.21267	0.00661095
17210947	ENSMUSG00000087247	Fam150a	family with sequence similarity 150, member A	1.20916	0.00680541
17331162	ENSMUSG00000068196	Col8a1	collagen, type VIII, alpha 1	1.20903	0.000688404
17229454	ENSMUSG00000038530	Rgs4	regulator of G-protein signaling 4	1.2074	0.00389534
17379523	ENSMUSG00000001403	Ube2c	ubiquitin-conjugating enzyme E2C	1.20537	0.00661738
17399812	ENSMUSG00000001025	S100a6	S100 calcium binding protein A6 (calcyclin)	1.19934	0.00197938
17357597	ENSMUSG00000024737	Slc15a3	solute carrier family 15, member 3	1.19382	0.000120728
17395155	ENSMUSG00000016256	Ctsz	cathepsin Z	1.19132	0.00014311
17514515	ENSMUSG00000043613	Mmp3	matrix metallopeptidase 3	1.1913	0.0394076
17451614	ENSMUSG00000092486	2610524H06Rik	RIKEN cDNA 2610524H06 gene	1.19065	0.00305461
17347042	ENSMUSG00000024056	Ndc80	NDC80 kinetochore complex component	1.19012	0.00589127
17510136	ENSMUSG00000031838	Ifi30	interferon gamma inducible protein 30	1.18891	0.00236326
17548681	ENSMUSG00000020857	Nme2	NME/NM23 nucleoside diphosphate kinase 2	1.18314	0.00670589
17548681	NA	Gm5566	predicted pseudogene 5566	1.18314	0.00670589
17408960	ENSMUSG00000040747	Cd53	CD53 antigen	1.18136	0.0221806
17218707	ENSMUSG00000066755	Tnfsf18	tumor necrosis factor (ligand) superfamily, member 18	1.18073	0.0379446
17513491	ENSMUSG00000031827	Cotl1	coactosin-like 1 (Dictyostelium)	1.18045	0.000244775
17227780	ENSMUSG00000026358	Rgs1	regulator of G-protein signaling 1	1.17991	0.0142495
17483615	ENSMUSG00000030789	Itgax	integrin alpha X	1.17983	0.00907514
17315570	ENSMUSG00000022488	Nckap1l	NCK associated protein 1 like	1.17907	0.000120728
17301428	ENSMUSG00000022033	Pbk	PDZ binding kinase	1.17728	0.00131571
17273447	ENSMUSG00000039364	Sectm1b	secreted and transmembrane 1B	1.1756	8.15714e-05
17503841	ENSMUSG00000033192	Lpcat2	lysophosphatidylcholine acyltransferase 2	1.16989	0.000464937
17280327	ENSMUSG00000020641	Rsad2	radical S-adenosyl methionine domain containing 2	1.16729	0.000867623
17439021	ENSMUSG00000029377	Ereg	epiregulin	1.16624	0.00121292
17517947	ENSMUSG00000025232	Hexa	hexosaminidase A	1.16497	0.000910565
17224551	ENSMUSG00000026204	Ptprn	protein tyrosine phosphatase, receptor type, N	1.16437	1.96114e-05
17453160	ENSMUSG00000025534	Gusb	glucuronidase, beta	1.1601	0.00018264
17485589	ENSMUSG00000058818	Pirb	paired Ig-like receptor B	1.15936	0.000867623
17517573	NA	Peak1os	pseudopodium-enriched atypical kinase 1, opposite strand	1.15768	0.00169156
17302141	ENSMUSG00000022014	Epsti1	epithelial stromal interaction 1 (breast)	1.15108	0.000867623
17406279	ENSMUSG00000027995	Tlr2	toll-like receptor 2	1.15067	0.00254788
17312759	ENSMUSG00000018008	Cyth4	cytohesin 4	1.14555	0.00013088
17357688	ENSMUSG00000024677	Ms4a6b	membrane-spanning 4-domains, subfamily A, member 6B	1.14339	0.00419872
17325874	ENSMUSG00000062082	Cd200r4	CD200 receptor 4	1.14292	0.00559957
17307280	ENSMUSG00000091649	Phf11b	PHD finger protein 11B	1.14274	0.000242459
17370527	ENSMUSG00000026866	Kynu	kynureninase (L-kynurenine hydrolase)	1.14261	0.000867623
17366201	ENSMUSG00000070031	Sp140	Sp140 nuclear body protein	1.1406	0.000658575
17366201	NA	LOC101055672	nuclear body protein SP140-like	1.1406	0.000658575
17366201	ENSMUSG00000079190	LOC100041057	sp110 nuclear body protein-like	1.1406	0.000658575
17366201	ENSMUSG00000052477	LOC100041057	sp110 nuclear body protein-like	1.1406	0.000658575
17366201	NA	Gm35498	predicted gene, 35498	1.1406	0.000658575
17366201	ENSMUSG00000052477	C130026I21Rik	RIKEN cDNA C130026I21 gene	1.1406	0.000658575
17366201	ENSMUSG00000089844	A530032D15Rik	RIKEN cDNA A530032D15Rik gene	1.1406	0.000658575
17519394	ENSMUSG00000034593	Myo5a	myosin VA	1.1363	0.000464937
17308965	ENSMUSG00000022021	Diaph3	diaphanous related formin 3	1.13614	0.00119793
17548593	ENSMUSG00000078453	Abracl	ABRA C-terminal like	1.13505	0.00528921
17271776	ENSMUSG00000047798	Cd300lf	CD300 molecule like family member F	1.13231	3.12158e-05
17330359	ENSMUSG00000002847	Pla1a	phospholipase A1 member A	1.13222	0.0120926
17426981	ENSMUSG00000028494	Plin2	perilipin 2	1.13173	0.000255853
17488292	ENSMUSG00000003363	Pld3	phospholipase D family, member 3	1.12907	0.00227323
17229782	ENSMUSG00000038179	Slamf7	SLAM family member 7	1.12773	0.00774505
17546109	ENSMUSG00000044583	Tlr7	toll-like receptor 7	1.12569	0.0107076
17306816	ENSMUSG00000022218	Tgm1	transglutaminase 1, K polypeptide	1.11876	0.000791507
17334419	ENSMUSG00000075705	Msrb1	methionine sulfoxide reductase B1	1.11863	0.00552036
17487361	ENSMUSG00000109350	Apoc4-apoc2	Apoc4-Apoc2 readthrough	1.11816	0.00453536
17487361	ENSMUSG00000002992	Apoc2	apolipoprotein C-II	1.11816	0.00453536
17262209	ENSMUSG00000058163	Gm5431	predicted gene 5431	1.11758	0.0192585
17288716	ENSMUSG00000021591	Glrx	glutaredoxin	1.11335	0.0269745
17457128	ENSMUSG00000029762	Akr1b8	aldo-keto reductase family 1, member B8	1.11093	0.0100828
17537895	ENSMUSG00000046432	Bex3	brain expressed X-linked 3	1.10706	0.0192585
17308772	ENSMUSG00000044350	Lacc1	laccase (multicopper oxidoreductase) domain containing 1	1.10549	0.00446819
17248288	ENSMUSG00000040711	Sh3pxd2b	SH3 and PX domains 2B	1.10395	0.000867623
17222719	ENSMUSG00000026042	Col5a2	collagen, type V, alpha 2	1.1035	0.007197
17403919	ENSMUSG00000028175	Depdc1a	DEP domain containing 1a	1.10288	0.00639946
17285859	ENSMUSG00000036181	Hist1h1c	histone cluster 1, H1c	1.10096	0.00626825
17371427	ENSMUSG00000027068	Dhrs9	dehydrogenase/reductase (SDR family) member 9	1.10025	0.0012393
17326081	ENSMUSG00000033031	C330027C09Rik	RIKEN cDNA C330027C09 gene	1.09705	0.0343257
17452054	ENSMUSG00000032690	Oas2	2'-5' oligoadenylate synthetase 2	1.09614	0.00280026
17374833	ENSMUSG00000027306	Nusap1	nucleolar and spindle associated protein 1	1.09444	0.00716442
17296344	ENSMUSG00000021765	Fst	follistatin	1.09252	0.00367505
17332531	ENSMUSG00000000386	Mx1	MX dynamin-like GTPase 1	1.09244	0.00237608
17254166	ENSMUSG00000072620	Slfn2	schlafen 2	1.09157	0.00094271
17339223	ENSMUSG00000032796	Lama1	laminin, alpha 1	1.0881	0.00169079
17285819	ENSMUSG00000061991	Hist1h2af	histone cluster 1, H2af	1.08657	0.048019
17487945	ENSMUSG00000060188	Cxcl17	chemokine (C-X-C motif) ligand 17	1.0859	0.000407838
17525578	ENSMUSG00000032122	Slc37a2	solute carrier family 37 (glycerol-3-phosphate transporter), member 2	1.08521	0.000120728
17219248	ENSMUSG00000006403	Adamts4	a disintegrin-like and metallopeptidase (reprolysin type) with thrombospondin type 1 motif, 4	1.07953	0.0316207
17435725	ENSMUSG00000025746	Il6	interleukin 6	1.07406	0.00143902
17516558	ENSMUSG00000049932	H2afx	H2A histone family, member X	1.07309	0.0454155
17362874	ENSMUSG00000024730	Ms4a8a	membrane-spanning 4-domains, subfamily A, member 8A	1.0715	0.0278016
17341540	ENSMUSG00000023905	Tnfrsf12a	tumor necrosis factor receptor superfamily, member 12a	1.06701	0.00314429
17436607	ENSMUSG00000054520	Sh3bp2	SH3-domain binding protein 2	1.06613	0.000157723
17315718	ENSMUSG00000039942	Ptger4	prostaglandin E receptor 4 (subtype EP4)	1.0647	9.55782e-05
17272619	ENSMUSG00000053113	Socs3	suppressor of cytokine signaling 3	1.06345	0.00013088
17241130	ENSMUSG00000020100	Slc29a3	solute carrier family 29 (nucleoside transporters), member 3	1.06334	0.00260312
17406514	ENSMUSG00000015852	Fcrls	Fc receptor-like S, scavenger receptor	1.06106	0.042119
17377793	ENSMUSG00000027469	Tpx2	TPX2, microtubule-associated	1.06086	0.0231707
17481770	ENSMUSG00000030790	Adm	adrenomedullin	1.05987	0.0364371
17299268	ENSMUSG00000037628	Cdkn3	cyclin-dependent kinase inhibitor 3	1.05835	0.0161858
17317167	ENSMUSG00000022367	Has2	hyaluronan synthase 2	1.05636	0.0111835
17294738	ENSMUSG00000021614	Vcan	versican	1.05546	0.00664663
17444961	ENSMUSG00000060063	Alox5ap	arachidonate 5-lipoxygenase activating protein	1.05423	0.000222042
17291012	ENSMUSG00000069309	Hist1h2an	histone cluster 1, H2an	1.05223	0.0156172
17543396	ENSMUSG00000034457	Eda2r	ectodysplasin A2 receptor	1.05151	0.00162114
17219139	ENSMUSG00000026678	Rgs5	regulator of G-protein signaling 5	1.05085	0.0392104
17407363	ENSMUSG00000056071	S100a9	S100 calcium binding protein A9 (calgranulin B)	1.04712	0.0325158
17355825	ENSMUSG00000024644	Cndp2	CNDP dipeptidase 2 (metallopeptidase M20 family)	1.04504	0.000105409
17336114	ENSMUSG00000024300	Myo1f	myosin IF	1.04405	0.00039882
17366244	ENSMUSG00000079190	LOC100041057	sp110 nuclear body protein-like	1.04279	0.0045325
17366244	ENSMUSG00000052477	LOC100041057	sp110 nuclear body protein-like	1.04279	0.0045325
17493949	ENSMUSG00000032725	Folr2	folate receptor 2 (fetal)	1.04	0.0358165
17512611	ENSMUSG00000053687	Dpep2	dipeptidase 2	1.0369	0.00018662
17265268	ENSMUSG00000018920	Cxcl16	chemokine (C-X-C motif) ligand 16	1.03516	0.00362645
17493358	ENSMUSG00000030641	Ddias	DNA damage-induced apoptosis suppressor	1.03122	0.000760155
17409826	ENSMUSG00000028007	Snx7	sorting nexin 7	1.03115	0.0171529
17432674	ENSMUSG00000028599	Tnfrsf1b	tumor necrosis factor receptor superfamily, member 1b	1.02983	0.000463119
17301108	ENSMUSG00000043157	Arl11	ADP-ribosylation factor-like 11	1.02948	0.00169734
17421476	ENSMUSG00000067916	Zfp991	zinc finger protein 991	1.0281	0.00339276
17321597	ENSMUSG00000023015	Racgap1	Rac GTPase-activating protein 1	1.02797	0.00487159
17312022	ENSMUSG00000005124	Wisp1	WNT1 inducible signaling pathway protein 1	1.02776	0.0111176
17313895	ENSMUSG00000022385	Gtse1	G two S phase expressed protein 1	1.02766	0.00288294
17431174	ENSMUSG00000000682	Cd52	CD52 antigen	1.0258	0.00510375
17481102	ENSMUSG00000030978	Rrm1	ribonucleotide reductase M1	1.02463	0.0236646
17353747	ENSMUSG00000051439	Cd14	CD14 antigen	1.0242	0.0167489
17374692	ENSMUSG00000027326	Knl1	kinetochore scaffold 1	1.02402	0.00806555
17233629	ENSMUSG00000004207	Psap	prosaposin	1.0231	0.000355023
17279608	ENSMUSG00000042029	Ncapg2	non-SMC condensin II complex, subunit G2	1.01891	0.00588409
17359020	ENSMUSG00000012443	Kif11	kinesin family member 11	1.01795	0.0380484
17286375	ENSMUSG00000021403	Serpinb9b	serine (or cysteine) peptidase inhibitor, clade B, member 9b	1.01786	0.0108291
17519738	ENSMUSG00000046186	Cd109	CD109 antigen	1.01517	0.00487302
17227892	ENSMUSG00000006014	Prg4	proteoglycan 4 (megakaryocyte stimulating factor, articular superficial zone protein)	1.01329	0.0272442
17443901	ENSMUSG00000025854	Fam20c	family with sequence similarity 20, member C	1.01151	0.00230512
17221186	ENSMUSG00000098234	Snhg6	small nucleolar RNA host gene 6	1.00954	0.00570344
17275255	ENSMUSG00000020598	Nrcam	neuronal cell adhesion molecule	1.00694	0.0455164
17351465	ENSMUSG00000001473	Tubb6	tubulin, beta 6 class V	1.00575	0.00398603
17404245	ENSMUSG00000039519	Cyp7b1	cytochrome P450, family 7, subfamily b, polypeptide 1	1.00363	0.00528921
17537889	ENSMUSG00000042712	Wbp5	WW domain binding protein 5	1.00306	0.00446819
17251978	ENSMUSG00000000318	Clec10a	C-type lectin domain family 10, member A	1.0027	0.0212193
17258867	ENSMUSG00000017716	Birc5	baculoviral IAP repeat-containing 5	1.00202	0.0144178
17222549	ENSMUSG00000048234	Rnf149	ring finger protein 149	1.00194	0.000120728
17287590	ENSMUSG00000005320	Fgfr4	fibroblast growth factor receptor 4	-1.00024	0.00556093
17238906	ENSMUSG00000096054	Syne1	spectrin repeat containing, nuclear envelope 1	-1.00348	0.00982819
17528673	ENSMUSG00000092137	Myzap	myocardial zonula adherens protein	-1.00399	0.00153708
17528673	ENSMUSG00000041361	Myzap	myocardial zonula adherens protein	-1.00399	0.00153708
17412952	ENSMUSG00000096237	Gm9615	predicted gene 9615	-1.00801	0.0455129
17412952	NA	Gm5859	predicted pseudogene 5859	-1.00801	0.0455129
17412952	NA	Gm3893	predicted gene 3893	-1.00801	0.0455129
17412952	NA	Gm29804	predicted gene, 29804	-1.00801	0.0455129
17412952	NA	Gm21158	predicted gene, 21158	-1.00801	0.0455129
17412952	NA	4933409K07Rik	RIKEN cDNA 4933409K07 gene	-1.00801	0.0455129
17402321	ENSMUSG00000053965	Pde5a	phosphodiesterase 5A, cGMP-specific	-1.00864	0.000867623
17224878	ENSMUSG00000055980	Irs1	insulin receptor substrate 1	-1.00877	0.00184305
17238862	ENSMUSG00000096054	Syne1	spectrin repeat containing, nuclear envelope 1	-1.00967	0.00421023
17235320	ENSMUSG00000035504	Reep6	receptor accessory protein 6	-1.0124	0.029354
17530915	NA	Gm9917	predicted gene 9917	-1.01629	0.00534233
17524775	ENSMUSG00000032198	Dock6	dedicator of cytokinesis 6	-1.01731	0.00410386
17264448	ENSMUSG00000052921	Arhgef15	Rho guanine nucleotide exchange factor (GEF) 15	-1.01932	0.000760155
17467062	ENSMUSG00000003477	Inmt	indolethylamine N-methyltransferase	-1.02158	0.000955154
17399347	ENSMUSG00000028047	Thbs3	thrombospondin 3	-1.02578	0.00109385
17336681	ENSMUSG00000033327	Tnxb	tenascin XB	-1.02652	0.00324624
17400862	ENSMUSG00000027875	Hmgcs2	3-hydroxy-3-methylglutaryl-Coenzyme A synthase 2	-1.02743	0.0171545
17238930	ENSMUSG00000096054	Syne1	spectrin repeat containing, nuclear envelope 1	-1.03282	0.0102182
17370209	ENSMUSG00000026879	Gsn	gelsolin	-1.03417	0.000241573
17460826	ENSMUSG00000030087	Klf15	Kruppel-like factor 15	-1.03574	0.0153141
17329500	ENSMUSG00000068428	Gmnc	geminin coiled-coil domain containing	-1.04264	0.00046184
17238912	ENSMUSG00000096054	Syne1	spectrin repeat containing, nuclear envelope 1	-1.04323	0.00456735
17249863	ENSMUSG00000020524	Gria1	glutamate receptor, ionotropic, AMPA1 (alpha 1)	-1.04981	0.0212429
17231789	ENSMUSG00000039891	Txlnb	taxilin beta	-1.05186	0.00242788
17353881	ENSMUSG00000024451	Arap3	ArfGAP with RhoGAP domain, ankyrin repeat and PH domain 3	-1.05217	0.000535193
17441595	ENSMUSG00000018604	Tbx3	T-box 3	-1.05326	0.000159061
17363925	NA	8430431K14Rik	RIKEN cDNA 8430431K14 gene	-1.06143	0.0144236
17235018	ENSMUSG00000061780	Cfd	complement factor D (adipsin)	-1.06338	0.0129231
17301732	NA	Gm26908	predicted gene, 26908	-1.0634	0.00544173
17406221	ENSMUSG00000033910	Gucy1a3	guanylate cyclase 1, soluble, alpha 3	-1.06368	5.63638e-05
17238934	ENSMUSG00000096054	Syne1	spectrin repeat containing, nuclear envelope 1	-1.06604	0.00865367
17288105	ENSMUSG00000021458	2010111I01Rik	RIKEN cDNA 2010111I01 gene	-1.06605	0.0198663
17385374	ENSMUSG00000026826	Nr4a2	nuclear receptor subfamily 4, group A, member 2	-1.06631	0.0369386
17336013	ENSMUSG00000073424	Cyp4f15	cytochrome P450, family 4, subfamily f, polypeptide 15	-1.07031	0.00592803
17286682	ENSMUSG00000039004	Bmp6	bone morphogenetic protein 6	-1.07119	0.00320107
17413054	ENSMUSG00000096826	Gm2506	predicted gene 2506	-1.07258	5.34457e-05
17413151	ENSMUSG00000096826	Gm2506	predicted gene 2506	-1.07258	5.34457e-05
17434221	ENSMUSG00000096826	Gm2506	predicted gene 2506	-1.07258	5.34457e-05
17413054	ENSMUSG00000095247	Gm2506	predicted gene 2506	-1.07258	5.34457e-05
17413151	ENSMUSG00000095247	Gm2506	predicted gene 2506	-1.07258	5.34457e-05
17434221	ENSMUSG00000095247	Gm2506	predicted gene 2506	-1.07258	5.34457e-05
17413054	ENSMUSG00000093828	Gm2506	predicted gene 2506	-1.07258	5.34457e-05
17413151	ENSMUSG00000093828	Gm2506	predicted gene 2506	-1.07258	5.34457e-05
17434221	ENSMUSG00000093828	Gm2506	predicted gene 2506	-1.07258	5.34457e-05
17413054	ENSMUSG00000073877	Gm2506	predicted gene 2506	-1.07258	5.34457e-05
17413151	ENSMUSG00000073877	Gm2506	predicted gene 2506	-1.07258	5.34457e-05
17434221	ENSMUSG00000073877	Gm2506	predicted gene 2506	-1.07258	5.34457e-05
17255058	ENSMUSG00000069763	Tmem100	transmembrane protein 100	-1.07499	0.00808339
17295059	ENSMUSG00000021684	Pde8b	phosphodiesterase 8B	-1.07677	0.00046184
17520425	ENSMUSG00000015354	Pcolce2	procollagen C-endopeptidase enhancer 2	-1.07979	0.00795725
17238922	ENSMUSG00000096054	Syne1	spectrin repeat containing, nuclear envelope 1	-1.08285	0.00326137
17213189	ENSMUSG00000102059	Gm20257	caspase 8 pseudogene	-1.09146	0.0456013
17544691	ENSMUSG00000042750	Bex2	brain expressed X-linked 2	-1.09392	0.0194792
17515402	ENSMUSG00000001349	Cnn1	calponin 1	-1.1008	0.0338506
17232881	ENSMUSG00000078451	Ppil6	peptidylprolyl isomerase (cyclophilin)-like 6	-1.10931	0.0196438
17350295	ENSMUSG00000097610	A930012L18Rik	RIKEN cDNA A930012L18 gene	-1.10969	0.0123713
17363533	ENSMUSG00000033207	Mamdc2	MAM domain containing 2	-1.11383	0.049765
17275596	ENSMUSG00000092515	C87198	expressed sequence C87198	-1.11564	0.00247999
17229891	ENSMUSG00000007097	Atp1a2	ATPase, Na+/K+ transporting, alpha 2 polypeptide	-1.11958	0.00322396
17386090	ENSMUSG00000034810	Scn7a	sodium channel, voltage-gated, type VII, alpha	-1.12456	0.00169694
17448924	ENSMUSG00000062960	Kdr	kinase insert domain protein receptor	-1.1278	0.000280667
17227910	ENSMUSG00000066842	Hmcn1	hemicentin 1	-1.13437	0.00208541
17439511	ENSMUSG00000035456	Prdm8	PR domain containing 8	-1.14785	0.0042576
17238920	ENSMUSG00000096054	Syne1	spectrin repeat containing, nuclear envelope 1	-1.14909	0.00274849
17404122	ENSMUSG00000058921	Slc10a5	solute carrier family 10 (sodium/bile acid cotransporter family), member 5	-1.15011	0.0068048
17514687	ENSMUSG00000031802	Phxr4	per-hexamer repeat gene 4	-1.15649	0.0194792
17229059	ENSMUSG00000026691	Fmo3	flavin containing monooxygenase 3	-1.15981	0.00237608
17362342	ENSMUSG00000024972	Lgals12	lectin, galactose binding, soluble 12	-1.16215	0.00126092
17388435	ENSMUSG00000027217	Tspan18	tetraspanin 18	-1.16465	0.00398603
17451936	NA	Tbx3os1	T-box 3, opposite strand 1	-1.17751	0.00572779
17434251	ENSMUSG00000094066	LOC100862324	protein FAM205A	-1.18173	0.016678
17434251	ENSMUSG00000093996	LOC100862324	protein FAM205A	-1.18173	0.016678
17434251	ENSMUSG00000079774	LOC100862324	protein FAM205A	-1.18173	0.016678
17434251	ENSMUSG00000078746	LOC100862324	protein FAM205A	-1.18173	0.016678
17434251	ENSMUSG00000094066	Fam205a4	family with sequence similarity 205, member A4	-1.18173	0.016678
17434251	ENSMUSG00000093996	Fam205a4	family with sequence similarity 205, member A4	-1.18173	0.016678
17434251	ENSMUSG00000079774	Fam205a4	family with sequence similarity 205, member A4	-1.18173	0.016678
17434251	ENSMUSG00000078746	Fam205a4	family with sequence similarity 205, member A4	-1.18173	0.016678
17434251	ENSMUSG00000094066	Fam205a3	family with sequence similarity 205, member A3	-1.18173	0.016678
17434251	ENSMUSG00000093996	Fam205a3	family with sequence similarity 205, member A3	-1.18173	0.016678
17434251	ENSMUSG00000079774	Fam205a3	family with sequence similarity 205, member A3	-1.18173	0.016678
17434251	ENSMUSG00000078746	Fam205a3	family with sequence similarity 205, member A3	-1.18173	0.016678
17434251	ENSMUSG00000094066	Fam205a2	family with sequence similarity 205, member A2	-1.18173	0.016678
17434251	ENSMUSG00000093996	Fam205a2	family with sequence similarity 205, member A2	-1.18173	0.016678
17434251	ENSMUSG00000079774	Fam205a2	family with sequence similarity 205, member A2	-1.18173	0.016678
17434251	ENSMUSG00000078746	Fam205a2	family with sequence similarity 205, member A2	-1.18173	0.016678
17434251	ENSMUSG00000078721	Fam205a1	family with sequence similarity 205, member A1	-1.18173	0.016678
17238918	ENSMUSG00000096054	Syne1	spectrin repeat containing, nuclear envelope 1	-1.1992	0.00655101
17471528	ENSMUSG00000033082	Clec1a	C-type lectin domain family 1, member a	-1.19965	0.000354368
17484587	ENSMUSG00000025479	Cyp2e1	cytochrome P450, family 2, subfamily e, polypeptide 1	-1.19982	0.0160057
17406363	ENSMUSG00000041842	Fhdc1	FH2 domain containing 1	-1.21132	0.0015025
17461060	NA	Gm38863	predicted gene, 38863	-1.21211	0.0143249
17461060	ENSMUSG00000097462	9530026P05Rik	RIKEN cDNA 9530026P05 gene	-1.21211	0.0143249
17354299	ENSMUSG00000019647	Sema6a	sema domain, transmembrane domain (TM), and cytoplasmic domain, (semaphorin) 6A	-1.21246	0.00419872
17503884	ENSMUSG00000031748	Gnao1	guanine nucleotide binding protein, alpha O	-1.21779	0.000120728
17488179	ENSMUSG00000108715	Ltbp4	latent transforming growth factor beta binding protein 4	-1.22747	0.01022
17488179	ENSMUSG00000040488	Ltbp4	latent transforming growth factor beta binding protein 4	-1.22747	0.01022
17218233	ENSMUSG00000032649	Colgalt2	collagen beta(1-O)galactosyltransferase 2	-1.23258	0.000607401
17233323	ENSMUSG00000038583	Pln	phospholamban	-1.23478	0.00286156
17413094	ENSMUSG00000094066	LOC100862324	protein FAM205A	-1.25935	0.00661738
17424415	ENSMUSG00000094066	LOC100862324	protein FAM205A	-1.25935	0.00661738
17413094	ENSMUSG00000093996	LOC100862324	protein FAM205A	-1.25935	0.00661738
17424415	ENSMUSG00000093996	LOC100862324	protein FAM205A	-1.25935	0.00661738
17413094	ENSMUSG00000079774	LOC100862324	protein FAM205A	-1.25935	0.00661738
17424415	ENSMUSG00000079774	LOC100862324	protein FAM205A	-1.25935	0.00661738
17413094	ENSMUSG00000078746	LOC100862324	protein FAM205A	-1.25935	0.00661738
17424415	ENSMUSG00000078746	LOC100862324	protein FAM205A	-1.25935	0.00661738
17413094	NA	LOC100041516	protein FAM205A-like	-1.25935	0.00661738
17424415	NA	LOC100041516	protein FAM205A-like	-1.25935	0.00661738
17413094	NA	Gm21158	predicted gene, 21158	-1.25935	0.00661738
17424415	NA	Gm21158	predicted gene, 21158	-1.25935	0.00661738
17413094	ENSMUSG00000094066	Fam205a4	family with sequence similarity 205, member A4	-1.25935	0.00661738
17424415	ENSMUSG00000094066	Fam205a4	family with sequence similarity 205, member A4	-1.25935	0.00661738
17413094	ENSMUSG00000093996	Fam205a4	family with sequence similarity 205, member A4	-1.25935	0.00661738
17424415	ENSMUSG00000093996	Fam205a4	family with sequence similarity 205, member A4	-1.25935	0.00661738
17413094	ENSMUSG00000079774	Fam205a4	family with sequence similarity 205, member A4	-1.25935	0.00661738
17424415	ENSMUSG00000079774	Fam205a4	family with sequence similarity 205, member A4	-1.25935	0.00661738
17413094	ENSMUSG00000078746	Fam205a4	family with sequence similarity 205, member A4	-1.25935	0.00661738
17424415	ENSMUSG00000078746	Fam205a4	family with sequence similarity 205, member A4	-1.25935	0.00661738
17413094	ENSMUSG00000094066	Fam205a3	family with sequence similarity 205, member A3	-1.25935	0.00661738
17424415	ENSMUSG00000094066	Fam205a3	family with sequence similarity 205, member A3	-1.25935	0.00661738
17413094	ENSMUSG00000093996	Fam205a3	family with sequence similarity 205, member A3	-1.25935	0.00661738
17424415	ENSMUSG00000093996	Fam205a3	family with sequence similarity 205, member A3	-1.25935	0.00661738
17413094	ENSMUSG00000079774	Fam205a3	family with sequence similarity 205, member A3	-1.25935	0.00661738
17424415	ENSMUSG00000079774	Fam205a3	family with sequence similarity 205, member A3	-1.25935	0.00661738
17413094	ENSMUSG00000078746	Fam205a3	family with sequence similarity 205, member A3	-1.25935	0.00661738
17424415	ENSMUSG00000078746	Fam205a3	family with sequence similarity 205, member A3	-1.25935	0.00661738
17413094	ENSMUSG00000094066	Fam205a2	family with sequence similarity 205, member A2	-1.25935	0.00661738
17424415	ENSMUSG00000094066	Fam205a2	family with sequence similarity 205, member A2	-1.25935	0.00661738
17413094	ENSMUSG00000093996	Fam205a2	family with sequence similarity 205, member A2	-1.25935	0.00661738
17424415	ENSMUSG00000093996	Fam205a2	family with sequence similarity 205, member A2	-1.25935	0.00661738
17413094	ENSMUSG00000079774	Fam205a2	family with sequence similarity 205, member A2	-1.25935	0.00661738
17424415	ENSMUSG00000079774	Fam205a2	family with sequence similarity 205, member A2	-1.25935	0.00661738
17413094	ENSMUSG00000078746	Fam205a2	family with sequence similarity 205, member A2	-1.25935	0.00661738
17424415	ENSMUSG00000078746	Fam205a2	family with sequence similarity 205, member A2	-1.25935	0.00661738
17413094	ENSMUSG00000078721	Fam205a1	family with sequence similarity 205, member A1	-1.25935	0.00661738
17424415	ENSMUSG00000078721	Fam205a1	family with sequence similarity 205, member A1	-1.25935	0.00661738
17392690	ENSMUSG00000027452	Acss1	acyl-CoA synthetase short-chain family member 1	-1.26186	0.00184305
17460023	ENSMUSG00000068323	Slc4a5	solute carrier family 4, sodium bicarbonate cotransporter, member 5	-1.27323	0.000247299
17316068	ENSMUSG00000022197	Pdzd2	PDZ domain containing 2	-1.27556	0.000120728
17317533	ENSMUSG00000022376	Adcy8	adenylate cyclase 8	-1.28314	0.000255603
17374137	ENSMUSG00000041644	Slc5a12	solute carrier family 5 (sodium/glucose cotransporter), member 12	-1.28498	0.0056767
17400994	NA	Gm12474	predicted gene 12474	-1.28885	0.0046191
17301502	ENSMUSG00000045875	Adra1a	adrenergic receptor, alpha 1a	-1.2905	0.000211194
17309099	ENSMUSG00000072294	Klf12	Kruppel-like factor 12	-1.30724	0.00241646
17284664	NA	Ighv1-84	immunoglobulin heavy variable 1-84	-1.31198	0.0378367
17344132	ENSMUSG00000091971	Hspa1a	heat shock protein 1A	-1.31944	0.0236646
17458866	ENSMUSG00000037973	Ccdc129	coiled-coil domain containing 129	-1.34245	0.0012393
17476732	ENSMUSG00000030495	Slc7a10	solute carrier family 7 (cationic amino acid transporter, y+ system), member 10	-1.34492	0.00118439
17389157	ENSMUSG00000074971	Fibin	fin bud initiation factor homolog (zebrafish)	-1.3472	0.000364052
17339902	ENSMUSG00000036368	Rmdn2	regulator of microtubule dynamics 2	-1.35107	0.00616857
17500744	ENSMUSG00000084960	B430010I23Rik	RIKEN cDNA B430010I23 gene	-1.35851	0.000240297
17217651	ENSMUSG00000026414	Tnnt2	troponin T2, cardiac	-1.3587	0.00290279
17260236	ENSMUSG00000020469	Myl7	myosin, light polypeptide 7, regulatory	-1.3678	0.0085148
17382378	ENSMUSG00000087028	Gm13387	predicted gene 13387	-1.3735	0.000867623
17317994	ENSMUSG00000022595	Lypd2	Ly6/Plaur domain containing 2	-1.38894	0.00192065
17287148	ENSMUSG00000043631	Ecm2	extracellular matrix protein 2, female organ and adipocyte specific	-1.40353	0.0271807
17464061	ENSMUSG00000107456	Gm10400	predicted gene 10400	-1.42768	0.00371174
17471518	ENSMUSG00000030158	Clec12b	C-type lectin domain family 12, member B	-1.43211	0.00528921
17343170	ENSMUSG00000024028	Tff2	trefoil factor 2 (spasmolytic protein 1)	-1.44867	0.0370813
17229020	ENSMUSG00000040181	Fmo1	flavin containing monooxygenase 1	-1.45592	8.36822e-06
17313858	NA	Lncppara	long noncoding RNA near Ppara	-1.47774	0.00234926
17326318	ENSMUSG00000035258	Abi3bp	ABI gene family, member 3 (NESH) binding protein	-1.4943	0.000695388
17378149	ENSMUSG00000027485	Bpifb1	BPI fold containing family B, member 1	-1.50017	0.0231083
17513550	ENSMUSG00000097336	Fendrr	Foxf1 adjacent non-coding developmental regulatory RNA	-1.50079	0.00410386
17268884	ENSMUSG00000020889	Nr1d1	nuclear receptor subfamily 1, group D, member 1	-1.54917	0.000571628
17306532	ENSMUSG00000040752	Myh6	myosin, heavy polypeptide 6, cardiac muscle, alpha	-1.55834	0.0388717
17213021	ENSMUSG00000064294	Aox3	aldehyde oxidase 3	-1.55987	0.000116111
17309268	ENSMUSG00000022122	Ednrb	endothelin receptor type B	-1.56484	0.000116111
17510772	ENSMUSG00000064325	Hhip	Hedgehog-interacting protein	-1.57013	0.00493363
17335726	ENSMUSG00000024027	Glp1r	glucagon-like peptide 1 receptor	-1.583	0.00699873
17260474	ENSMUSG00000020427	Igfbp3	insulin-like growth factor binding protein 3	-1.62241	0.00020369
17485098	ENSMUSG00000066108	Muc5b	mucin 5, subtype B, tracheobronchial	-1.62618	0.00559957
17389510	ENSMUSG00000068614	Actc1	actin, alpha, cardiac muscle 1	-1.6722	0.0201792
17517360	ENSMUSG00000042045	Sln	sarcolipin	-1.68936	0.0191209
17410022	ENSMUSG00000028116	Myoz2	myozenin 2	-1.69197	0.000371443
17517770	ENSMUSG00000032315	Cyp1a1	cytochrome P450, family 1, subfamily a, polypeptide 1	-1.71607	0.000120728
17459389	NA	Igk	immunoglobulin kappa chain complex	-1.95463	0.0353788
17255227	ENSMUSG00000039084	Chad	chondroadherin	-2.39103	2.7604e-05
17396152	ENSMUSG00000027559	Car3	carbonic anhydrase 3	-2.55114	0.000249216
17489363	ENSMUSG00000050440	Hamp	hepcidin antimicrobial peptide	-3.88098	3.12158e-05
