# Supplementary material for: Transcriptomic profile of the mice aging lung is associated with inflammation and apoptosis as important pathways
Source: Aging (Albany NY). 2021 May 12;13(9):12378–94. doi: 10.18632/aging.203039 (PMC8148450; doi:10.18632/aging.203039)
Supplement: Supplementary Table 2 [file aging-13-203039-s003.xlsx]

## Sheet: canonical_pathways
Supplementary Table 2. Ingenuity canonical pathways and related genes.
Ingenuity Canonical Pathways	-log(p-value)	Ratio	z-score	Molecules
Nicotine Degradation II	4.03	0.14	-2.646	Aox3,CYP1A1,CYP2E1,CYP4F8,FMO1,FMO3,INMT
Antioxidant Action of Vitamin C	1.67	0.06	-2.236	CSF2RB,GLRX,HMOX1,PLA2G7,PLD3,PLD4
Opioid Signaling Pathway	0.39	0.0253	-2.236	ADCY8,GNAO1,RGS1,RGS4,RGS5,SCN7A
Nicotine Degradation III	1.9	0.0952	-2	Aox3,CYP1A1,CYP2E1,CYP4F8
AMPK Signaling	0	0.0192	-2	ADRA1A,CCNA2,CDKN1A,IRS1
Inhibition of Matrix Metalloproteases	4.91	0.189	-1.89	MMP12,MMP13,MMP14,MMP19,MMP3,MMP8,TIMP1
LXR/RXR Activation	3.25	0.0833	-1.89	APOC2,CCL2,CD14,IL1RN,IL6,LPL,MSR1,S100A8,TNFRSF1B
cAMP-mediated signaling	0.724	0.0324	-1.89	ADCY8,GLP1R,GNAO1,PDE5A,PDE8B,PTGER4,RGS4
STAT3 Pathway	1.56	0.0519	-1.342	BMP6,CDKN1A,CSF2RB,FGFR4,IL7R,KDR,SOCS3
White Adipose Tissue Browning Pathway	0.848	0.0394	-1.342	ADCY8,FCER1G,FGFR4,GUCY1A1,KDR
Cardiac Hypertrophy Signaling	0.425	0.0262	-1.342	ADCY8,ADRA1A,GNAO1,IL6,IRS1,MYL7
Protein Kinase A Signaling	0	0.019	-1.134	ADCY8,CDKN3,H1-2,MYL7,PDE5A,PDE8B,PTPRN
Cell Cycle: G2/M DNA Damage Checkpoint Regulation	1.67	0.0816	-1	CCNB2,CDK1,CDKN1A,TOP2A
Semaphorin Neuronal Repulsive Signaling Pathway	0.559	0.0325	-1	GUCY1A1,MYL7,SEMA6A,VCAN
Synaptic Long Term Depression	0.257	0.0221	-1	GNAO1,GRIA1,GUCY1A1,PLA2G7
Synaptogenesis Signaling Pathway	0	0.0133	-1	ADCY8,GRIA1,THBS1,THBS3
eNOS Signaling	0.959	0.0397	-0.447	ADCY8,CCNA2,GUCY1A1,HSPA1A/HSPA1B,KDR,PDGFC
Signaling by Rho Family GTPases	0.395	0.0254	-0.447	ACTC1,ARHGEF15,CYBB,DIAPH3,GNAO1,MYL7
ILK Signaling	1.01	0.0389	-0.378	ACTC1,FN1,IRS1,ITGB2,MYH6,MYL7,PDGFC
Actin Cytoskeleton Signaling	1.41	0.0431	0	ACTC1,CD14,DIAPH3,FN1,GSN,MYH6,MYL7,NCKAP1L,PDGFC
ATM Signaling	1.31	0.0543	0	CCNB2,CDK1,CDKN1A,GADD45G,H2AX
Phospholipase C Signaling	1.22	0.0395	0	ADCY8,ARHGEF15,FCER1G,FCGR2A,FCGR2B,HMOX1,MYL7,PLD3,PLD4
Coronavirus Pathogenesis Pathway	1.17	0.0455	0	CCL2,IL6,IRF7,RPS2,SERPINE1,STING1
Nitric Oxide Signaling in the Cardiovascular System	0.845	0.043	0	GUCY1A1,KDR,PDE5A,PDGFC
Apoptosis Signaling	0.799	0.0412	0	BCL2A1,CDK1,NAIP,TNFRSF1B
Cardiac Hypertrophy Signaling (Enhanced)	0.511	0.0258	0	ADCY8,ADRA1A,CSF2RB,CYBB,DIAPH3,EDNRB,FGFR4,IL6,IL7R,PDE5A,PDE8B,TNFRSF1B
Endocannabinoid Cancer Inhibition Pathway	0.456	0.029	0	ADCY8,CDKN1A,GNAO1,PDGFC
PPARÎ±/RXRÎ± Activation	0.272	0.0226	0	ADCY8,IL6,IRS1,LPL
Adrenomedullin signaling pathway	0	0.0208	0	ADCY8,ADM,GUCY1A1,IL1RN
Systemic Lupus Erythematosus In B Cell Signaling Pathway	1.79	0.0456	0.302	CD72,FCGR2A,FCGR2B,IL6,IRF7,ISG15,LILRB3,LILRB4,STING1,TLR7,TLR8
Complement System	7.64	0.273	0.447	C1QA,C1QB,C1QC,C3AR1,CFB,CFD,ITGAM,ITGAX,ITGB2
BEX2 Signaling Pathway	1.66	0.0676	0.447	BEX1,CDKN1A,LGALS1,PDGFC,SPP1
GÎ±q Signaling	0.631	0.0329	0.447	ADRA1A,HMOX1,PLD3,PLD4,RGS4
Integrin Signaling	0.551	0.0294	0.447	ACTC1,GSN,ITGAM,ITGAX,ITGB2,MYL7
Natural Killer Cell Signaling	0.801	0.0357	0.816	FCER1G,FCGR2A,FCGR3A/FCGR3B,HSPA1A/HSPA1B,LAIR1,TYROBP
Estrogen Receptor Signaling	1.07	0.0347	0.905	ADCY8,CDKN1A,GNAO1,MMP12,MMP13,MMP14,MMP19,MMP3,MMP8,MYL7,PDGFC
Activation of IRF by Cytosolic Pattern Recognition Receptors	1.61	0.0784	1	IL6,IRF7,ISG15,ZBP1
Th17 Activation Pathway	1.34	0.0645	1	FCER1G,IL6,PTGER4,SOCS3
Cyclins and Cell Cycle Regulation	1.05	0.0513	1	CCNA2,CCNB2,CDK1,CDKN1A
Th2 Pathway	0.947	0.0424	1	CCR1,CCR5,CD80,ITGB2,SOCS3
IL-6 Signaling	0.9	0.041	1	CD14,IL1RN,IL6,SOCS3,TNFRSF1B
Aryl Hydrocarbon Receptor Signaling	0.79	0.0376	1	CCNA2,CDKN1A,CTSD,CYP1A1,IL6
mTOR Signaling	0.618	0.0311	1	HMOX1,IRS1,PDGFC,PLD3,PLD4,RPS2
T Cell Exhaustion Signaling Pathway	0.456	0.029	1	CD80,FCER1G,IL6,KDR
Coagulation System	3.06	0.143	1.342	F13A1,F7,FGG,PLAU,SERPINE1
NF-ÎºB Signaling	1.53	0.0479	1.414	FCER1G,FGFR4,IL1RN,KDR,TLR2,TLR7,TLR8,TNFRSF1B
Endothelin-1 Signaling	1.4	0.0449	1.414	ADCY8,EDNRB,GNAO1,GUCY1A1,HMOX1,PLA2G7,PLD3,PLD4
Regulation Of The Epithelial Mesenchymal Transition By Growth Factors Pathway	0.693	0.033	1.633	FGFR4,IL6,mir-8,PDGFC,TNFRSF1B,TNFSF18
Senescence Pathway	0.955	0.0347	1.667	CCNB2,CDK1,CDKN1A,GADD45G,IL6,Saa3,SERPINE1,STING1,TLR2
Hepatic Fibrosis Signaling Pathway	1.09	0.0341	1.732	CCL2,CYBB,IL1RN,KDR,mir-8,MMP13,MYL7,PDGFC,SERPINE1,SPP1,TIMP1,TNFRSF1B
Pancreatic Adenocarcinoma Signaling	2.06	0.0654	1.89	BIRC5,CDKN1A,CYP2E1,HMOX1,PDGFC,PLD3,PLD4
Role of NFAT in Regulation of the Immune Response	1.16	0.0422	1.89	CD80,FCER1G,FCGR1A,FCGR2A,FCGR2B,FCGR3A/FCGR3B,GNAO1
Toll-like Receptor Signaling	1.73	0.0704	2	CD14,IL1RN,TLR2,TLR7,TLR8
Leukocyte Extravasation Signaling	3.58	0.0684	2.111	ACTC1,CLDN4,CYBA,CYBB,ITGAM,ITGB2,MMP12,MMP13,MMP14,MMP19,MMP3,MMP8,TIMP1
IL-8 Signaling	2.52	0.0576	2.111	CSTB,CYBB,HMOX1,ITGAM,ITGAX,ITGB2,KDR,MYL7,PDGFC,PLD3,PLD4
FcÎ³ Receptor-mediated Phagocytosis in Macrophages and Monocytes	3.07	0.087	2.121	ACTC1,FCGR1A,FCGR2A,FCGR3A/FCGR3B,HMOX1,MYO5A,PLD3,PLD4
Phospholipases	2.11	0.0877	2.236	HMOX1,PLA1A,PLA2G7,PLD3,PLD4
GP6 Signaling Pathway	0.971	0.0431	2.236	COL5A2,COL8A1,FCER1G,FGG,LAMA1
Acute Phase Response Signaling	2.98	0.0659	2.333	CFB,FGG,FN1,HMOX1,IL1RN,IL6,Saa3,SERPINA3,SERPINE1,SOCS3,TNFRSF1B
HOTAIR Regulatory Pathway	2.28	0.0604	2.333	CDKN1A,mir-8,MMP12,MMP13,MMP14,MMP19,MMP3,MMP8,SPP1
Kinetochore Metaphase Signaling Pathway	1.71	0.0612	2.449	BIRC5,CDK1,H2AX,KNL1,NDC80,NUF2
Production of Nitric Oxide and Reactive Oxygen Species in Macrophages	0.752	0.0345	2.449	APOC2,CYBA,CYBB,S100A8,TLR2,TNFRSF1B
Crosstalk between Dendritic Cells and Natural Killer Cells	3.93	0.116	2.646	ACTC1,CD80,CSF2RB,IL6,TLR7,TNFRSF1B,TREM2,TYROBP
Osteoarthritis Pathway	3.41	0.0657	2.714	ADAMTS4,CCN4,FN1,GREM1,MMP12,MMP13,MMP3,PDGFC,S100A8,S100A9,SPP1,TLR2,TNFRSF1B
Role of Pattern Recognition Receptors in Recognition of Bacteria and Viruses	4.98	0.0935	2.828	C1QA,C1QB,C1QC,C3AR1,CLEC6A,CLEC7A,IL6,IRF7,OAS1,OAS2,TLR2,TLR7,TLR8
HIF1Î± Signaling	5.25	0.0821	3	ADM,BMP6,CDKN1A,CYBB,HMOX1,HSPA1A/HSPA1B,IL6,KDR,MMP12,MMP13,MMP14,MMP19,MMP3,MMP8,PDGFC,SERPINE1
TREM1 Signaling	4.77	0.13	3	CCL2,FCGR2B,IL6,ITGAX,Tlr13,TLR2,TLR7,TLR8,TYROBP
Neuroinflammation Signaling Pathway	4.57	0.0664	3	BIRC5,CCL2,CD200R1,CD80,CXCL10,CYBB,GRIA1,HMOX1,IL6,IRF7,MMP3,NAIP,Tlr13,TLR2,TLR7,TLR8,TREM2,TYROBP
Dendritic Cell Maturation	3.98	0.08	3.162	CD80,FCER1G,FCGR1A,FCGR2A,FCGR2B,FCGR3A/FCGR3B,IL1RN,IL6,TLR2,TNFRSF1B,TREM2,TYROBP
Colorectal Cancer Metastasis Signaling	3.52	0.0612	3.357	ADCY8,BIRC5,IL6,MMP12,MMP13,MMP14,MMP19,MMP3,MMP8,PDGFC,PTGER4,Tlr13,TLR2,TLR7,TLR8
Agranulocyte Adhesion and Diapedesis	13.7	0.151	NaN	ACTC1,Ccl2,CCL2,CCL27,CCL3L3,Ccl6,Ccl7,Ccl9,CLDN4,CXCL10,CXCL13,CXCL16,CXCL17,FN1,IL1RN,ITGB2,MMP12,MMP13,MMP14,MMP19,MMP3,MMP8,MYH6,MYL7,PF4
Granulocyte Adhesion and Diapedesis	12.5	0.148	NaN	Ccl2,CCL2,CCL27,CCL3L3,Ccl6,Ccl7,Ccl9,CLDN4,CXCL10,CXCL13,CXCL16,CXCL17,IL1RN,ITGAM,ITGB2,MMP12,MMP13,MMP14,MMP19,MMP3,MMP8,PF4,TNFRSF1B
Phagosome Formation	10.8	0.168	NaN	C3AR1,CLEC7A,FCER1G,FCGR1A,FCGR2A,FCGR2B,FCGR3A/FCGR3B,Fcrls,FN1,ITGAM,ITGAX,ITGB2,MARCO,MSR1,Tlr13,TLR2,TLR7,TLR8
Hepatic Fibrosis / Hepatic Stellate Cell Activation	7.9	0.106	NaN	CCL2,CCR5,CD14,COL5A2,COL8A1,CYP2E1,EDNRB,FN1,IGFBP3,IL6,KDR,LAMA1,MMP13,MYH6,MYL7,PDGFC,SERPINE1,TIMP1,TNFRSF1B
Communication between Innate and Adaptive Immune Cells	6.95	0.172	NaN	CCL3L3,Ccl9,CD80,CXCL10,FCER1G,IL1RN,IL6,Tlr13,TLR2,TLR7,TLR8
Atherosclerosis Signaling	6.86	0.125	NaN	APOC2,CCL2,CCR2,IL1RN,IL6,ITGB2,LPL,MMP13,MMP3,MSR1,PDGFC,PLA2G7,S100A8,TNFRSF12A
Altered T Cell and B Cell Signaling in Rheumatoid Arthritis	5.22	0.13	NaN	CD80,CXCL13,FCER1G,IL1RN,IL6,SPP1,Tlr13,TLR2,TLR7,TLR8
IL-10 Signaling	4.93	0.136	NaN	CCR1,CCR5,CD14,FCGR2A,FCGR2B,HMOX1,IL1RN,IL6,SOCS3
Role of Hypercytokinemia/hyperchemokinemia in the Pathogenesis of Influenza	4.7	0.222	NaN	CCL2,CCR1,CCR5,CXCL10,IL1RN,IL6
MSP-RON Signaling Pathway	3.76	0.127	NaN	ACTC1,CCL2,CCR2,CSF2RB,ITGAM,ITGB2,TLR2
Pathogenesis of Multiple Sclerosis	3.72	0.5	NaN	CCR1,CCR5,CXCL10
Bladder Cancer Signaling	3.7	0.0957	NaN	CDKN1A,MMP12,MMP13,MMP14,MMP19,MMP3,MMP8,PDGFC,THBS1
Role of Macrophages, Fibroblasts and Endothelial Cells in Rheumatoid Arthritis	3.6	0.0576	NaN	ADAMTS4,CCL2,FCGR1A,FCGR3A/FCGR3B,FN1,GNAO1,IL1RN,IL6,MMP13,MMP3,PDGFC,SOCS3,Tlr13,TLR2,TLR7,TLR8,TNFRSF1B
Role of Osteoblasts, Osteoclasts and Chondrocytes in Rheumatoid Arthritis	3.13	0.0613	NaN	ADAMTS4,BMP6,CTSK,GSN,IL1RN,IL6,MMP13,MMP14,MMP3,MMP8,NAIP,SPP1,TNFRSF1B
Phagosome Maturation	3.02	0.0714	NaN	ATP6V0D2,CTSB,CTSD,CTSK,CTSS,CTSV,CTSZ,CYBB,RAB7B,TUBB6
Autophagy	2.81	0.103	NaN	CTSB,CTSD,CTSK,CTSS,CTSV,CTSZ
Choline Biosynthesis III	2.51	0.214	NaN	HMOX1,PLD3,PLD4
Systemic Lupus Erythematosus Signaling	2.49	0.0606	NaN	CD72,CD80,FCER1G,FCGR1A,FCGR2A,FCGR2B,FCGR3A/FCGR3B,IL1RN,IL6,TLR7
Extrinsic Prothrombin Activation Pathway	2.34	0.188	NaN	F13A1,F7,FGG
Chondroitin Sulfate Degradation (Metazoa)	2.34	0.188	NaN	CEMIP,HEXA,HEXB
IL-17 Signaling	2.27	0.0811	NaN	CCL2,CXCL10,IL6,MMP3,MUC5B,TIMP1
Dermatan Sulfate Degradation (Metazoa)	2.26	0.176	NaN	CEMIP,HEXA,HEXB
Graft-versus-Host Disease Signaling	2.22	0.118	NaN	CD80,FCER1G,IL1RN,IL6
GADD45 Signaling	2.12	0.158	NaN	CDK1,CDKN1A,GADD45G
Role of IL-17F in Allergic Inflammatory Airway Diseases	2.09	0.108	NaN	CCL2,CXCL10,IL6,MMP13
Retinol Biosynthesis	2.05	0.105	NaN	AKR1B10,DHRS9,LIPF,LPL
Eicosanoid Signaling	1.99	0.082	NaN	ALOX5AP,DPEP2,HPGDS,PLA2G7,PTGER4
Bupropion Degradation	1.94	0.136	NaN	CYP1A1,CYP2E1,CYP4F8
Role of IL-17A in Psoriasis	1.92	0.25	NaN	S100A8,S100A9
Cellular Effects of Sildenafil (Viagra)	1.75	0.0569	NaN	ACTC1,ADCY8,GUCY1A1,MYH6,MYL7,PDE5A,SLC4A5
Estrogen-mediated S-phase Entry	1.74	0.115	NaN	CCNA2,CDK1,CDKN1A
Acetone Degradation I (to Methylglyoxal)	1.66	0.107	NaN	CYP1A1,CYP2E1,CYP4F8
VDR/RXR Activation	1.57	0.0641	NaN	CD14,CDKN1A,CXCL10,IGFBP3,SPP1
Pregnenolone Biosynthesis	1.51	0.154	NaN	CYP2E1,CYP7B1
IL-17A Signaling in Fibroblasts	1.5	0.0938	NaN	CCL2,IL6,LCN2
Inhibition of Angiogenesis by TSP1	1.47	0.0909	NaN	GUCY1A1,KDR,THBS1
Differential Regulation of Cytokine Production in Macrophages and T Helper Cells by IL-17A and IL-17F	1.39	0.133	NaN	CCL2,IL6
Histidine Degradation VI	1.39	0.133	NaN	CYP2E1,CYP7B1
Glycine Degradation (Creatine Biosynthesis)	1.37	0.5	NaN	GATM
Mitotic Roles of Polo-Like Kinase	1.37	0.0656	NaN	CCNB2,CDK1,KIF11,PRC1
Estrogen Biosynthesis	1.34	0.0811	NaN	CYP1A1,CYP2E1,CYP4F8
Lipid Antigen Presentation by CD1	1.34	0.125	NaN	FCER1G,PSAP
Methylglyoxal Degradation III	1.34	0.125	NaN	AKR1B10,CYP2E1
T Helper Cell Differentiation	1.32	0.0635	NaN	CD80,FCER1G,IL6,TNFRSF1B
Differential Regulation of Cytokine Production in Intestinal Epithelial Cells by IL-17A and IL-17F	1.29	0.118	NaN	CCL2,LCN2
Ubiquinol-10 Biosynthesis (Eukaryotic)	1.29	0.118	NaN	CYP2E1,CYP7B1
p53 Signaling	1.27	0.0532	NaN	BIRC5,CCNG1,CDKN1A,GADD45G,THBS1
Melatonin Degradation I	1.26	0.075	NaN	CYP1A1,CYP2E1,CYP4F8
Triacylglycerol Degradation	1.26	0.075	NaN	LIPF,LPL,PLA1A
Type I Diabetes Mellitus Signaling	1.21	0.051	NaN	CD80,FCER1G,PTPRN,SOCS3,TNFRSF1B
Oncostatin M Signaling	1.21	0.0714	NaN	MMP13,MMP3,PLAU
BAG2 Signaling Pathway	1.21	0.0714	NaN	CDKN1A,CTSB,HSPA1A/HSPA1B
The Visual Cycle	1.2	0.105	NaN	AKR1B10,DHRS9
DNA damage-induced 14-3-3Ïƒ Signaling	1.2	0.105	NaN	CCNB2,CDK1
Inflammasome pathway	1.2	0.105	NaN	CTSB,NAIP
Ascorbate Recycling (Cytosolic)	1.2	0.333	NaN	GLRX
Thyroid Hormone Biosynthesis	1.2	0.333	NaN	CTSD
Caveolar-mediated Endocytosis Signaling	1.17	0.0563	NaN	ACTC1,ITGAM,ITGAX,ITGB2
LPS/IL-1 Mediated Inhibition of RXR Function	1.16	0.04	NaN	APOC2,CD14,FABP5,FMO1,FMO3,HMGCS2,IL1RN,TNFRSF1B
Superpathway of Melatonin Degradation	1.13	0.0667	NaN	CYP1A1,CYP2E1,CYP4F8
Th1 Pathway	1.12	0.0481	NaN	CCR5,CD80,IL6,ITGB2,SOCS3
Hepatic Cholestasis	1.1	0.0409	NaN	ADCY8,CD14,CYP7B1,FGFR4,IL1RN,IL6,TNFRSF1B
Role of PKR in Interferon Induction and Antiviral Response	1.1	0.0472	NaN	FCGR1A,HSPA1A/HSPA1B,MARCO,MSR1,PDGFC
Heme Degradation	1.08	0.25	NaN	HMOX1
Glutathione Redox Reactions II	1.08	0.25	NaN	GLRX
Arginine Degradation I (Arginase Pathway)	1.08	0.25	NaN	ARG1
Lactose Degradation III	1.08	0.25	NaN	PSAP
Acetate Conversion to Acetyl-CoA	1.08	0.25	NaN	ACSS1
Apelin Cardiac Fibroblast Signaling Pathway	1.06	0.087	NaN	IL6,SERPINE1
B Cell Development	1.03	0.0833	NaN	CD80,IL7R
Breast Cancer Regulation by Stathmin1	0.996	0.0304	NaN	ADGRE1,ADRA1A,ARHGEF15,BMP6,C3AR1,CCR1,CCR2,CCR5,CDK1,EDNRB,GLP1R,GPR65,P2RY6,PDGFC,PTAFR,PTGER4,TUBB6
Role of JAK family kinases in IL-6-type Cytokine Signaling	0.996	0.08	NaN	IL6,SOCS3
Î±-tocopherol Degradation	0.983	0.2	NaN	CYP4F8
Hematopoiesis from Pluripotent Stem Cells	0.967	0.0769	NaN	FCER1G,IL6
Ethanol Degradation II	0.967	0.0769	NaN	ACSS1,DHRS9
Th1 and Th2 Activation Pathway	0.967	0.04	NaN	CCR1,CCR5,CD80,IL6,ITGB2,SOCS3
Sonic Hedgehog Signaling	0.939	0.0741	NaN	CDK1,HHIP
Urea Cycle	0.91	0.167	NaN	ARG1
Arginine Degradation VI (Arginase 2 Pathway)	0.91	0.167	NaN	ARG1
UDP-N-acetyl-D-glucosamine Biosynthesis II	0.91	0.167	NaN	FMO3
Tryptophan Degradation to 2-amino-3-carboxymuconate Semialdehyde	0.91	0.167	NaN	KYNU
Glucocorticoid Receptor Signaling	0.876	0.0325	NaN	ANXA1,CCL2,CDKN1A,FCGR1A,FGG,HSPA1A/HSPA1B,IL1RN,IL6,PLAU,SERPINE1
Axonal Guidance Signaling	0.876	0.0302	NaN	ADAMTS4,ARHGEF15,BMP6,GNAO1,HHIP,MMP12,MMP13,MMP14,MMP3,MMP8,MYL7,PDGFC,SEMA6A,TUBB6
Autoimmune Thyroid Disease Signaling	0.863	0.0667	NaN	CD80,FCER1G
TNFR2 Signaling	0.863	0.0667	NaN	NAIP,TNFRSF1B
Interferon Signaling	0.863	0.0667	NaN	ISG15,OAS1
Aspartate Degradation II	0.848	0.143	NaN	LIPF
Iron homeostasis signaling pathway	0.839	0.0391	NaN	ATP6V0D2,BMP6,HMOX1,IL6,SLC11A1
Role of JAK2 in Hormone-like Cytokine Signaling	0.818	0.0625	NaN	IRS1,SOCS3
Retinoate Biosynthesis I	0.818	0.0625	NaN	AKR1B10,DHRS9
IL-9 Signaling	0.796	0.0606	NaN	IRS1,SOCS3
Antiproliferative Role of TOB in T Cell Signaling	0.796	0.0606	NaN	CCNA2,FCER1G
TWEAK Signaling	0.757	0.0571	NaN	NAIP,TNFRSF12A
NAD Phosphorylation and Dephosphorylation	0.747	0.111	NaN	Acp5
Citrulline Biosynthesis	0.747	0.111	NaN	ARG1
Airway Pathology in Chronic Obstructive Pulmonary Disease	0.745	0.0392	NaN	CCL2,IL6,LCN2,MMP8
Growth Hormone Signaling	0.74	0.0441	NaN	IGFBP3,IRS1,SOCS3
Role of JAK1 and JAK3 in Î³c Cytokine Signaling	0.74	0.0441	NaN	IL7R,IRS1,SOCS3
Role of Cytokines in Mediating Communication between Immune Cells	0.738	0.0556	NaN	IL1RN,IL6
Paxillin Signaling	0.714	0.0381	NaN	ACTC1,ITGAM,ITGAX,ITGB2
Role of Lipids/Lipid Rafts in the Pathogenesis of Influenza	0.706	0.1	NaN	RSAD2
NAD biosynthesis II (from tryptophan)	0.706	0.1	NaN	KYNU
Prostanoid Biosynthesis	0.706	0.1	NaN	HPGDS
Allograft Rejection Signaling	0.686	0.0513	NaN	CD80,FCER1G
Intrinsic Prothrombin Activation Pathway	0.686	0.0513	NaN	F13A1,FGG
Relaxin Signaling	0.678	0.0342	NaN	ADCY8,GNAO1,GUCY1A1,PDE5A,PDE8B
Ketogenesis	0.67	0.0909	NaN	HMGCS2
G-Protein Coupled Receptor Signaling	0.658	0.0301	NaN	ADCY8,ADRA1A,GLP1R,GNAO1,PDE5A,PDE8B,PTGER4,RGS4
Role of MAPK Signaling in the Pathogenesis of Influenza	0.656	0.04	NaN	CCL2,CXCL10,PLA2G7
Macropinocytosis Signaling	0.656	0.04	NaN	CD14,ITGB2,PDGFC
tRNA Splicing	0.654	0.0488	NaN	PDE5A,PDE8B
Guanosine Nucleotides Degradation III	0.636	0.0833	NaN	GDA
FXR/RXR Activation	0.631	0.0351	NaN	APOC2,FGFR4,IL1RN,LPL
Granzyme A Signaling	0.606	0.0769	NaN	H1-2
Leukotriene Biosynthesis	0.606	0.0769	NaN	DPEP2
Mevalonate Pathway I	0.606	0.0769	NaN	HMGCS2
JAK/Stat Signaling	0.602	0.0375	NaN	CDKN1A,IL6,SOCS3
BMP signaling pathway	0.592	0.037	NaN	BMP6,FST,GREM1
HER-2 Signaling in Breast Cancer	0.582	0.0366	NaN	AREG,CDKN1A,ITGB2
FAT10 Cancer Signaling Pathway	0.58	0.0435	NaN	IL6,TNFRSF1B
Tight Junction Signaling	0.562	0.0309	NaN	ACTC1,CLDN4,MYH6,MYL7,TNFRSF1B
Superpathway of Citrulline Metabolism	0.553	0.0667	NaN	ARG1
Regulation of Actin-based Motility by Rho	0.545	0.0349	NaN	ACTC1,GSN,MYL7
Death Receptor Signaling	0.536	0.0345	NaN	ACTC1,NAIP,TNFRSF1B
Role of IL-17A in Arthritis	0.53	0.04	NaN	CCL2,MMP13
Purine Nucleotides Degradation II (Aerobic)	0.53	0.0625	NaN	GDA
PD-1, PD-L1 cancer immunotherapy pathway	0.51	0.0333	NaN	CD80,CIP2A,TNFRSF1B
Oxidative Ethanol Degradation III	0.507	0.0588	NaN	ACSS1
Superpathway of Geranylgeranyldiphosphate Biosynthesis I (via Mevalonate)	0.507	0.0588	NaN	HMGCS2
Cell Cycle Control of Chromosomal Replication	0.496	0.0377	NaN	CDK1,TOP2A
SPINK1 Pancreatic Cancer Pathway	0.485	0.037	NaN	CTSB,MMP12
D-myo-inositol (1,4,5,6)-Tetrakisphosphate Biosynthesis	0.481	0.0299	NaN	ATP1A2,CA3,PTPRN,SOCS3
D-myo-inositol (3,4,5,6)-tetrakisphosphate Biosynthesis	0.481	0.0299	NaN	ATP1A2,CA3,PTPRN,SOCS3
Role of CHK Proteins in Cell Cycle Checkpoint Control	0.475	0.0364	NaN	CDK1,CDKN1A
Hereditary Breast Cancer Signaling	0.475	0.0296	NaN	CDK1,CDKN1A,GADD45G,H2AX
Amyotrophic Lateral Sclerosis Signaling	0.47	0.0316	NaN	GRIA1,NAIP,PDGFC
SPINK1 General Cancer Pathway	0.465	0.0357	NaN	IL6,Mt2
VEGF Signaling	0.462	0.0312	NaN	ACTC1,KDR,PDGFC
Clathrin-mediated Endocytosis Signaling	0.461	0.0279	NaN	ACTC1,APOC2,ITGB2,PDGFC,S100A8
Nur77 Signaling in T Lymphocytes	0.455	0.0351	NaN	CD80,FCER1G
PXR/RXR Activation	0.446	0.0345	NaN	HMGCS2,IL6
Gustation Pathway	0.444	0.0286	NaN	ADCY8,P2RY6,PDE5A,PDE8B
PPAR Signaling	0.434	0.03	NaN	IL1RN,PDGFC,TNFRSF1B
NAD Salvage Pathway II	0.433	0.0476	NaN	Acp5
Ethanol Degradation IV	0.433	0.0476	NaN	ACSS1
Induction of Apoptosis by HIV1	0.427	0.0333	NaN	NAIP,TNFRSF1B
IL-17A Signaling in Airway Cells	0.427	0.0333	NaN	IL6,MUC5B
IGF-1 Signaling	0.42	0.0294	NaN	IGFBP3,IRS1,SOCS3
IL-17A Signaling in Gastric Cells	0.418	0.0455	NaN	CXCL10
Pyrimidine Deoxyribonucleotides De Novo Biosynthesis I	0.418	0.0455	NaN	RRM1
Tryptophan Degradation X (Mammalian, via Tryptamine)	0.418	0.0455	NaN	AKR1B10
Epithelial Adherens Junction Signaling	0.416	0.0276	NaN	ACTC1,MYH6,MYL7,TUBB6
GÎ±s Signaling	0.407	0.0288	NaN	ADCY8,GLP1R,PTGER4
RAR Activation	0.406	0.0263	NaN	ADCY8,AKR1B10,CSF2RB,DHRS9,IGFBP3
TCA Cycle II (Eukaryotic)	0.402	0.0435	NaN	LIPF
Tryptophan Degradation III (Eukaryotic)	0.402	0.0435	NaN	KYNU
Vitamin-C Transport	0.402	0.0435	NaN	GLRX
Regulation of Cellular Mechanics by Calpain Protease	0.401	0.0317	NaN	CCNA2,CDK1
Neuroprotective Role of THOP1 in Alzheimer's Disease	0.4	0.0286	NaN	CFD,F7,SERPINA3
Gap Junction Signaling	0.4	0.0262	NaN	ACTC1,ADCY8,GRIA1,GUCY1A1,TUBB6
3-phosphoinositide Degradation	0.399	0.027	NaN	ATP1A2,CA3,PTPRN,SOCS3
D-myo-inositol-5-phosphate Metabolism	0.394	0.0268	NaN	ATP1A2,CA3,PTPRN,SOCS3
Remodeling of Epithelial Adherens Junctions	0.393	0.0312	NaN	ACTC1,TUBB6
IL-22 Signaling	0.388	0.0417	NaN	SOCS3
Gluconeogenesis I	0.388	0.0417	NaN	LIPF
Calcium Signaling	0.387	0.0258	NaN	ACTC1,GRIA1,MYH6,MYL7,TNNT2
HMGB1 Signaling	0.384	0.0265	NaN	CCL2,IL6,SERPINE1,TNFRSF1B
Cytotoxic T Lymphocyte-mediated Apoptosis of Target Cells	0.375	0.04	NaN	FCER1G
Glutathione-mediated Detoxification	0.375	0.04	NaN	HPGDS
Apelin Liver Signaling Pathway	0.363	0.0385	NaN	IRS1
Basal Cell Carcinoma Signaling	0.355	0.029	NaN	BMP6,HHIP
GPCR-Mediated Integration of Enteroendocrine Signaling Exemplified by an L Cell	0.355	0.029	NaN	ADCY8,GLP1R
Xenobiotic Metabolism AHR Signaling Pathway	0.355	0.029	NaN	CYP1A1,IL6
GM-CSF Signaling	0.355	0.029	NaN	BCL2A1,CSF2RB
IL-12 Signaling and Production in Macrophages	0.353	0.0265	NaN	APOC2,S100A8,TLR2
Role of Tissue Factor in Cancer	0.353	0.0265	NaN	F7,FGG,MMP13
Apelin Endothelial Signaling Pathway	0.353	0.0265	NaN	ADCY8,CCL2,GNAO1
3-phosphoinositide Biosynthesis	0.35	0.0253	NaN	ATP1A2,CA3,PTPRN,SOCS3
IL-15 Production	0.342	0.0261	NaN	FGFR4,IL6,KDR
Glioma Invasiveness Signaling	0.34	0.0282	NaN	PLAU,TIMP1
Superpathway of Cholesterol Biosynthesis	0.339	0.0357	NaN	HMGCS2
Leptin Signaling in Obesity	0.333	0.0278	NaN	ADCY8,SOCS3
Noradrenaline and Adrenaline Degradation	0.328	0.0345	NaN	DHRS9
RhoA Signaling	0.326	0.0254	NaN	ACTC1,ANLN,MYL7
Agrin Interactions at Neuromuscular Junction	0.314	0.0267	NaN	ACTC1,ITGB2
Chemokine Signaling	0.314	0.0267	NaN	CCL2,CCR5
Cdc42 Signaling	0.312	0.0248	NaN	DIAPH3,FCER1G,MYL7
Role of RIG1-like Receptors in Antiviral Innate Immunity	0.307	0.0323	NaN	IRF7
MIF-mediated Glucocorticoid Regulation	0.307	0.0323	NaN	CD14
CTLA4 Signaling in Cytotoxic T Lymphocytes	0.302	0.026	NaN	CD80,FCER1G
Antiproliferative Role of Somatostatin Receptor 2	0.302	0.026	NaN	CDKN1A,GUCY1A1
Apelin Adipocyte Signaling Pathway	0.302	0.026	NaN	ADCY8,CYBB
Circadian Rhythm Signaling	0.298	0.0312	NaN	NR1D1
PTEN Signaling	0.292	0.024	NaN	CDKN1A,FGFR4,KDR
Endocannabinoid Neuronal Synapse Pathway	0.292	0.024	NaN	ADCY8,GNAO1,GRIA1
RhoGDI Signaling	0.287	0.0231	NaN	ACTC1,ARHGEF15,GNAO1,MYL7
Prolactin Signaling	0.285	0.025	NaN	IRS1,SOCS3
Primary Immunodeficiency Signaling	0.28	0.0294	NaN	IL7R
NF-ÎºB Activation by Viruses	0.273	0.0244	NaN	CCR5,ITGB2
Cardiac Î²-adrenergic Signaling	0.266	0.0229	NaN	ADCY8,PDE5A,PDE8B
Sertoli Cell-Sertoli Cell Junction Signaling	0.264	0.0223	NaN	ACTC1,CLDN4,GUCY1A1,TUBB6
Human Embryonic Stem Cell Pluripotency	0.262	0.0227	NaN	BMP6,FGFR4,PDGFC
PI3K Signaling in B Lymphocytes	0.254	0.0224	NaN	CD180,FCGR2B,IRS1
Ceramide Signaling	0.253	0.0233	NaN	CTSD,TNFRSF1B
CCR5 Signaling in Macrophages	0.253	0.0233	NaN	CCR5,FCER1G
Docosahexaenoic Acid (DHA) Signaling	0.248	0.0263	NaN	BCL2A1
MIF Regulation of Innate Immunity	0.241	0.0256	NaN	CD14
Mechanisms of Viral Exit from Host Cells	0.241	0.0256	NaN	ACTC1
Serotonin Receptor Signaling	0.241	0.0256	NaN	ADCY8
IL-1 Signaling	0.239	0.0225	NaN	ADCY8,GNAO1
Pyrimidine Ribonucleotides Interconversion	0.234	0.025	NaN	CTPS1
ErbB Signaling	0.23	0.022	NaN	AREG,EREG
Salvage Pathways of Pyrimidine Ribonucleotides	0.225	0.0217	NaN	APOBEC1,CDK1
Pyrimidine Ribonucleotides De Novo Biosynthesis	0.221	0.0238	NaN	CTPS1
iNOS Signaling	0.208	0.0227	NaN	CD14
Serotonin Degradation	0.208	0.0227	NaN	DHRS9
IL-23 Signaling Pathway	0.208	0.0227	NaN	SOCS3
Role of Oct4 in Mammalian Embryonic Stem Cell Pluripotency	0.203	0.0222	NaN	SPP1
Neuregulin Signaling	0	0.0215	NaN	AREG,EREG
Synaptic Long Term Potentiation	0	0.0161	NaN	ADCY8,GRIA1
Fc Epsilon RI Signaling	0	0.00893	NaN	FCER1G
Huntington's Disease Signaling	0	0.00893	NaN	CTSD,HSPA1A/HSPA1B
NRF2-mediated Oxidative Stress Response	0	0.0169	NaN	ACTC1,FMO1,HMOX1
Role of BRCA1 in DNA Damage Response	0	0.0125	NaN	CDKN1A
Erythropoietin Signaling	0	0.0132	NaN	SOCS3
14-3-3-mediated Signaling	0	0.00806	NaN	TUBB6
Î±-Adrenergic Signaling	0	0.0215	NaN	ADCY8,ADRA1A
FcÎ³RIIB Signaling in B Lymphocytes	0	0.0133	NaN	FCGR2B
LPS-stimulated MAPK Signaling	0	0.0125	NaN	CD14
Calcium-induced T Lymphocyte Apoptosis	0	0.0189	NaN	FCER1G
IL-3 Signaling	0	0.013	NaN	CSF2RB
fMLP Signaling in Neutrophils	0	0.00893	NaN	CYBB
CXCR4 Signaling	0	0.0185	NaN	ADCY8,GNAO1,MYL7
CD28 Signaling in T Helper Cells	0	0.0187	NaN	CD80,FCER1G
Virus Entry via Endocytic Pathways	0	0.0196	NaN	ACTC1,ITGB2
Reelin Signaling in Neurons	0	0.0159	NaN	ARHGEF15,ITGB2
Melatonin Signaling	0	0.0147	NaN	GNAO1
Angiopoietin Signaling	0	0.0135	NaN	BIRC5
Neuropathic Pain Signaling In Dorsal Horn Neurons	0	0.0102	NaN	GRIA1
Factors Promoting Cardiogenesis in Vertebrates	0	0.014	NaN	BMP6,MYH6
Renin-Angiotensin Signaling	0	0.0174	NaN	ADCY8,CCL2
Thrombin Signaling	0	0.0199	NaN	ADCY8,ARHGEF15,GNAO1,MYL7
CDK5 Signaling	0	0.0192	NaN	ADCY8,LAMA1
iCOS-iCOSL Signaling in T Helper Cells	0	0.0202	NaN	CD80,FCER1G
Molecular Mechanisms of Cancer	0	0.0211	NaN	ADCY8,ARHGEF15,BMP6,CDK1,CDKN1A,GNAO1,IRS1,NAIP
Corticotropin Releasing Hormone Signaling	0	0.0213	NaN	ADCY8,GNAO1,GUCY1A1
HGF Signaling	0	0.0185	NaN	CDKN1A,IL6
Maturity Onset Diabetes of Young (MODY) Signaling	0	0.0189	NaN	APOC2
GNRH Signaling	0	0.00599	NaN	ADCY8
Cholecystokinin/Gastrin-mediated Signaling	0	0.00885	NaN	IL1RN
Melanocyte Development and Pigmentation Signaling	0	0.0108	NaN	ADCY8
Androgen Signaling	0	0.00758	NaN	GNAO1
Germ Cell-Sertoli Cell Junction Signaling	0	0.0185	NaN	ACTC1,GSN,TUBB6
Aldosterone Signaling in Epithelial Cells	0	0.00658	NaN	HSPA1A/HSPA1B
Role of NANOG in Mammalian Embryonic Stem Cell Pluripotency	0	0.00855	NaN	BMP6
CREB Signaling in Neurons	0	0.0148	NaN	ADCY8,GNAO1,GRIA1
Melanoma Signaling	0	0.02	NaN	CDKN1A
Prostate Cancer Signaling	0	0.0112	NaN	CDKN1A
Glioma Signaling	0	0.0183	NaN	CDKN1A,PDGFC
Acute Myeloid Leukemia Signaling	0	0.0114	NaN	CSF2RB
Thyroid Cancer Signaling	0	0.013	NaN	IRS1
Type II Diabetes Mellitus Signaling	0	0.0216	NaN	IRS1,SOCS3,TNFRSF1B
Chronic Myeloid Leukemia Signaling	0	0.0098	NaN	CDKN1A
GÎ±12/13 Signaling	0	0.00787	NaN	MYL7
p70S6K Signaling	0	0.00794	NaN	IRS1
Myc Mediated Apoptosis Signaling	0	0.0208	NaN	TNFRSF1B
G Beta Gamma Signaling	0	0.00833	NaN	GNAO1
Sphingosine-1-phosphate Signaling	0	0.0183	NaN	ADCY8,PDGFC
FAK Signaling	0	0.0106	NaN	ACTC1
EIF2 Signaling	0	0.0154	NaN	ACTC1,RPL10,RPS2
PAK Signaling	0	0.0215	NaN	MYL7,PDGFC
Rac Signaling	0	0.00909	NaN	CYBB
Ovarian Cancer Signaling	0	0.0073	NaN	PDGFC
Regulation of eIF4 and p70S6K Signaling	0	0.014	NaN	IRS1,RPS2
Role of NFAT in Cardiac Hypertrophy	0	0.00966	NaN	ADCY8,IL6
RANK Signaling in Osteoclasts	0	0.0118	NaN	GSN
Glioblastoma Multiforme Signaling	0	0.0124	NaN	CDKN1A,PDGFC
Regulation of IL-2 Expression in Activated and Anergic T Lymphocytes	0	0.0118	NaN	CD80
PKCÎ¸ Signaling in T Lymphocytes	0	0.014	NaN	CD80,FCER1G
TNFR1 Signaling	0	0.0208	NaN	NAIP
Role of PI3K/AKT Signaling in the Pathogenesis of Influenza	0	0.0196	NaN	CCR5
OX40 Signaling Pathway	0	0.0196	NaN	FCER1G
P2Y Purigenic Receptor Signaling Pathway	0	0.0161	NaN	ADCY8,P2RY6
Dopamine-DARPP32 Feedback in cAMP Signaling	0	0.0128	NaN	ADCY8,GUCY1A1
Telomerase Signaling	0	0.0099	NaN	CDKN1A
VEGF Family Ligand-Receptor Interactions	0	0.0123	NaN	KDR
Ephrin B Signaling	0	0.0141	NaN	GNAO1
GDNF Family Ligand-Receptor Interactions	0	0.0133	NaN	IRS1
Heparan Sulfate Biosynthesis	0	0.0152	NaN	PLA1A
Heparan Sulfate Biosynthesis (Late Stages)	0	0.0169	NaN	PLA1A
Pyridoxal 5'-phosphate Salvage Pathway	0	0.0154	NaN	CDK1
Superpathway of Inositol Phosphate Compounds	0	0.0211	NaN	ATP1A2,CA3,PTPRN,SOCS3
Stearate Biosynthesis I (Animals)	0	0.0213	NaN	CYP2E1
GÎ±i Signaling	0	0.0164	NaN	ADCY8,RGS4
Regulation of the Epithelial-Mesenchymal Transition Pathway	0	0.0105	NaN	FGFR4,mir-8
Sperm Motility	0	0.0191	NaN	FGFR4,GUCY1A1,KDR,PLA2G7
Tec Kinase Signaling	0	0.0197	NaN	ACTC1,FCER1G,GNAO1
Adipogenesis pathway	0	0.0154	NaN	FGFR4,LPL
Unfolded protein response	0	0.0182	NaN	HSPA1A/HSPA1B
Cell Cycle: G1/S Checkpoint Regulation	0	0.0156	NaN	CDKN1A
SAPK/JNK Signaling	0	0.0213	NaN	FCER1G,IRS1
PI3K/AKT Signaling	0	0.0175	NaN	CDKN1A,CSF2RB,IL7R
Protein Ubiquitination Pathway	0	0.00772	NaN	HSPA1A/HSPA1B,UBE2C
FGF Signaling	0	0.0119	NaN	FGFR4
GABA Receptor Signaling	0	0.0111	NaN	ADCY8
Xenobiotic Metabolism Signaling	0	0.0197	NaN	CYP1A1,FMO1,FMO3,HMOX1,IL6
IL-4 Signaling	0	0.0125	NaN	IRS1
B Cell Receptor Signaling	0	0.0176	NaN	BCL2A1,FCGR2A,FCGR2B
Wnt/Î²-catenin Signaling	0	0.00602	NaN	GNAO1
Insulin Receptor Signaling	0	0.0146	NaN	IRS1,SOCS3
Phototransduction Pathway	0	0.0208	NaN	GUCY1A1
Dopamine Receptor Signaling	0	0.0137	NaN	ADCY8
p38 MAPK Signaling	0	0.0183	NaN	IL1RN,TNFRSF1B
Glutamate Receptor Signaling	0	0.0179	NaN	GRIA1
TGF-Î² Signaling	0	0.0213	NaN	IRF7,SERPINE1
Hypoxia Signaling in the Cardiovascular System	0	0.0141	NaN	UBE2C
PDGF Signaling	0	0.0116	NaN	PDGFC
GPCR-Mediated Nutrient Sensing in Enteroendocrine Cells	0	0.00917	NaN	ADCY8
Cancer Drug Resistance By Drug Efflux	0	0.0175	NaN	mir-181
IL-7 Signaling Pathway	0	0.0141	NaN	IL7R
Sirtuin Signaling Pathway	0	0.0114	NaN	GADD45G,H1-2,HMGCS2
NER Pathway	0	0.0102	NaN	TOP2A
Endocannabinoid Developing Neuron Pathway	0	0.0175	NaN	ADCY8,GNAO1
Apelin Cardiomyocyte Signaling Pathway	0	0.0104	NaN	MYL7
Systemic Lupus Erythematosus In T Cell Signaling Pathway	0	0.0115	NaN	CD80,FCER1G,IL6
Inhibition of ARE-Mediated mRNA Degradation Pathway	0	0.0177	NaN	TNFRSF1B,TNFSF18
Necroptosis Signaling Pathway	0	0.0216	NaN	CYBB,TNFRSF1B,ZBP1
Xenobiotic Metabolism General Signaling Pathway	0	0.00794	NaN	HMOX1
Xenobiotic Metabolism CAR Signaling Pathway	0	0.019	NaN	CYP1A1,FMO1,FMO3
Insulin Secretion Signaling Pathway	0	0.00858	NaN	ADCY8,GLP1R
Regulation Of The Epithelial Mesenchymal Transition In Development Pathway	0	0.0122	NaN	mir-8
Ephrin Receptor Signaling	0	0.0169	NaN	ARHGEF15,GNAO1,PDGFC
