# Supplementary material for: Transcriptomic profile of the mice aging lung is associated with inflammation and apoptosis as important pathways
Source: Aging (Albany NY). 2021 May 12;13(9):12378–94. doi: 10.18632/aging.203039 (PMC8148450; doi:10.18632/aging.203039)
Supplement: Supplementary Table 3 [file aging-13-203039-s004.xlsx]

## Sheet: upstream_analysis
Supplementary Table 3. Upstream regulators and target molecules.
Upstream Regulator	Expr Log Ratio	Molecule Type	Predicted Activation State	Activation z-score	p-value of overlap	Target Molecules in Dataset
IL10RA	0.528	transmembrane receptor	Inhibited	-4.235	5.43e-16	APOC2,CD300LF,CFB,CLEC12A,CLEC4E,CLEC5A,EDNRB,F13A1,FABP5,Fcrls,FN1,FOLR2,GDA,HMCN1,HPSE,IFI16,IL1RN,IL6,IRF7,ITGAM,LCN2,LGALS12,LRG1,MSRB1,OLR1,PF4,RSAD2,Saa3,SIRPB1,SLC10A5,SLC7A11,SOCS3,TARM1,TFEC,TLR2,ZBP1
APOE	0.968	transporter	Inhibited	-4.173	7.92e-20	ADGRE1,C1QA,C1QB,C1QC,C3AR1,Ccl2,CCL3L3,CCR5,CD68,CD80,CTSB,CTSD,CTSK,CTSS,CTSV,CYBB,FCGR1A,FCGR2B,GRIA1,HMOX1,HSPA1A/HSPA1B,IL1RN,IL6,ITGAM,ITGAX,LAMA1,LCN2,LIPA,LPL,MMP3,MSR1,PLAU,S100A8,S100A9,SERPINA3,SERPINE1,SOCS3,SPP1,TIMP1,TREM2
INSIG1	-0.037	other	Inhibited	-4.025	9.29e-14	ALOX5AP,CCR5,CD68,CLEC4D,CLEC4E,CLEC7A,CXCL10,CXCL13,FABP5,HMGCS2,IL6,LCN2,LIPA,LPL,MARCO,OLR1,PLA2G7,PLIN2,S100A8,S100A9
SOCS1	0.18	other	Inhibited	-3.776	2e-12	ARG1,BCL2A1,CCL2,Ccl2,CD200R1,CDKN1A,CXCL10,FCER1G,IFI16,IL6,IRF7,IRS1,ISG15,MMP12,MMP13,Mx1,OAS1,OAS2,RSAD2,SOCS3
CAT	-0.758	enzyme	Inhibited	-3.544	1.69e-11	Abcb1b,ADM,BCL2A1,CCL2,Ccl2,CDKN1A,FN1,HMOX1,IL6,SERPINE1,THBS1,TIMP1,TNC
TFRC	0.472	transporter	Inhibited	-3.464	6.65e-10	CCNA2,CDK1,CDKN1A,F13A1,FAM20C,HMOX1,ITGAM,ITGB2,MCEMP1,MMP12,MS4A6A,PLD4,RGS1,SPRR1A,TNFRSF12A
ETV6-RUNX1		fusion gene/product	Inhibited	-3.401	1.28e-05	ADM,ALOX5AP,CD72,CYBA,CYBB,FABP5,IFI16,IFI30,IRF7,ISG15,ITGB2,LGALS1,mir-181,Mx1,OAS1,OAS2,RSAD2,SEMA6A,SPP1,ZBTB20
ADAMTS12	0.452	peptidase	Inhibited	-3.132	1.19e-10	CLEC4E,CXCL10,IL6,LCN2,LGALS1,MMP13,MMP3,S100A6,S100A8,S100A9
USP18	0.581	peptidase	Inhibited	-3.12	1.19e-10	Acp5,Ccl2,CCL3L3,CTSK,CXCL10,IL6,IRF7,ISG15,OAS1,SOCS3
ACKR2	-0.046	G-protein coupled receptor	Inhibited	-3.118	2.38e-08	CCL3L3,CCR2,CXCL10,IFI16,Ifi27l2a/Ifi27l2b,IRF7,ISG15,OAS1,OAS2,RSAD2
mir-21		microRNA	Inhibited	-3.049	2.07e-17	ANLN,AOAH,CCL2,Ccl2,CCL3L3,CCNA2,CD180,CDKN1A,CLEC5A,CXCL10,DDIAS,ECT2,FCGR1A,FCGR2A,FN1,GTSE1,H2AX,IFI16,IL6,MARCO,MKI67,NUSAP1,OAS2,Orm1 (includes others),PBK,PRC1,RAB7B,RACGAP1,SIGLEC1,SIRPB1,Slfn2,TGM1,TLR2,TOP2A,TREM2
TRIM59	0.268	enzyme	Inhibited	-2.985	5.35e-10	ARG1,Ccl2,LCN2,MMP13,MMP3,MMP8,Saa3,TIMP1,TLR2
NPC1	0.153	transporter	Inhibited	-2.941	4.72e-12	CCL3L3,CCR1,CCR2,CCR5,CD68,CTSB,CTSD,CTSK,GUSB,ITGAX,LGALS3,LIPA,LPL,MMP14,MMP8,S100A8,S100A9
DICER1	0.007	enzyme	Inhibited	-2.897	5.98e-05	CCNG1,CCR2,CDKN1A,CXCL10,FCGR2A,H2AX,IL7R,ITGAX,KDR,mir-181,mir-8,OAS1,PLAU,PTPRN,RGS5,SERPINE1,SOCS3,THBS1
RC3H1	-0.248	enzyme	Inhibited	-2.828	1.72e-07	CCL2,CXCL13,IFI16,IFI30,ISG15,OAS1,OAS2,RSAD2,SPP1,STING1,TNFRSF1B
NCSTN	0.183	peptidase	Inhibited	-2.813	1.1e-06	Ccl9,CD14,CD68,CD84,CSF2RB,FCER1G,FCGR2A,FCGR2B
BNIP3L	-0.001	other	Inhibited	-2.813	5.78e-05	Ccl2,CCNA2,CDKN3,CKAP2,GSN,KIF11,NUF2,TOP2A
ZNF106	-0.033	other	Inhibited	-2.714	2.04e-09	ACTC1,CXCL10,GLRX,GPNMB,Ifi27l2a/Ifi27l2b,LGALS1,LGALS3,S100A8,SERPINA3,SLC11A1,TNFRSF12A
Ptprd	-0.295	phosphatase	Inhibited	-2.646	8.51e-09	BIRC5,CCL2,Ccl2,Ccl6,CDK1,CDKN1A,GADD45G
TNIP1	0.281	other	Inhibited	-2.63	1.63e-05	CCR1,LCN2,MMP8,S100A8,S100A9,Saa3,Stfa2/Stfa2l1
ABCB4	0.059	transporter	Inhibited	-2.626	3.69e-06	Ccl2,CXCL10,LGALS3,MMP13,SERPINE1,SPP1,TIMP1
NT5E	0.639	phosphatase	Inhibited	-2.621	2.73e-08	Ccl2,IL6,MKI67,MMP13,SERPINE1,SPP1,TIMP1
ABCG1	0.595	transporter	Inhibited	-2.574	3.69e-06	Ccl2,CCL3L3,CCR5,CH25H,CXCL13,CYP7B1,IL6
L2HGDH	0.119	enzyme	Inhibited	-2.449	1.01e-08	CCL3L3,Ccl6,CD68,CLEC7A,CYBB,ITGAX
ERK		group	Activated	4.406	1.8e-17	AREG,CCL2,Ccl2,Ccl7,CCR1,CDKN1A,CLDN4,CTSK,CXCL10,CYP1A1,EREG,FN1,FST,HMOX1,IL6,IRS1,ITGAM,ITGB2,KYNU,LCN2,MAFB,MMP13,MMP14,MMP3,PDGFC,PLAU,RAB7B,RGS4,SERPINE1,THBS1,TIMP1,VCAN
TGFB1	0.484	growth factor	Activated	4.413	1.4e-38	Acp5,ACSS1,ACTC1,ADAMTS4,ADM,ALOX5AP,AOPEP,APOC2,AREG,ARG1,BIRC5,BMP6,C1QA,C1QB,C1QC,C3AR1,CCL2,Ccl2,CCL27,CCL3L3,Ccl7,CCN4,CCNA2,CCNB2,CCR1,CCR2,CCR5,CD14,CD200R1,CD68,CD72,CD80,CDHR1,CDK1,CDKN1A,CDKN3,CEMIP,CFB,CFD,CLDN4,CNN1,COL8A1,COTL1,CTPS1,CTSB,CTSD,CTSK,CTSS,CXCL10,CXCL13,CYBA,CYBB,CYP1A1,EDNRB,EREG,F13A1,FABP5,FCER1G,FCGR1A,FCGR3A/FCGR3B,FGG,FN1,GATM,GNAO1,GREM1,GRIA1,GSN,GUSB,Hamp/Hamp2…
NFkB (complex)		complex	Activated	4.423	5.36e-18	ADGRE1,ADM,BCL2A1,BEX1,BIRC5,CCL2,Ccl2,CCL3L3,Ccl7,CCNB2,CCR2,CD80,CDKN1A,CFB,CLEC4E,CXCL10,CYBB,EDNRB,FABP5,FCGR1A,FGG,FN1,FST,HAS2,HMOX1,IL1RN,IL6,IL7R,IRF7,ISG15,ITGAM,KDR,KYNU,LCN2,MMP13,MMP3,MUC5B,NR1D1,OLR1,PLAU,PTAFR,RSAD2,Saa3,SERPINA3,SERPINE1,SOCS3,SPP1,TFEC,TIMP1,TLR2,Wfdc17
CSF1	0.478	cytokine	Activated	4.458	2.09e-22	Acp5,ARG1,BIRC5,CCL2,Ccl2,Ccl7,CCR1,CCR5,CD68,CDKN1A,CLEC7A,CTSD,CTSK,CYBB,FCER1G,FCGR2A,FCGR3A/FCGR3B,FN1,FOLR2,GPNMB,IL6,IRF7,ITGAM,ITGAX,LPL,MAFB,MARCO,MMP12,MSR1,PLAU,SIGLEC1,SIRPB1,SLC37A2,SLFN12L,SPP1,THBS1,TLR2,TNFRSF1B,ZNF705A
TLR4	0.366	transmembrane receptor	Activated	4.505	2.1e-17	ADM,AREG,CCL2,Ccl2,CCL3L3,Ccl7,CCR5,CD14,CD200R1,CD80,CFB,CTSK,CXCL10,EREG,FCGR2B,GADD45G,HMOX1,HPSE,IFI16,IL6,IRF7,ISG15,ITGAM,LCN2,LILRB4,MARCO,Mx1,NR4A2,PLA1A,PLEK,RGS1,RSAD2,SLC7A11,SLFN12L,SOCS3,SPP1,TLR2,TREM2,Wfdc17
PDGF BB		complex	Activated	4.543	4.9e-16	Abcb1b,ADM,AREG,BMP6,CCL2,Ccl2,Ccl7,CDK1,CDKN1A,CNN1,EDNRB,EREG,FMO1,FN1,GDA,GREM1,HMOX1,IL6,LGALS3,MMP12,MMP14,MMP3,Mt2,NR4A2,OLR1,PLAU,RGS1,SERPINA3,SERPINE1,SOCS3,SYNE1,THBS1,TIMP1,TNC,TNFRSF12A,VCAN
MYD88	0.83	other	Activated	4.573	1.36e-20	ARG1,CCL2,Ccl2,CCL3L3,CCN4,CD14,CD200R1,CD80,CH25H,CLEC10A,CTSK,CXCL10,CXCL13,EDNRB,FCER1G,HMOX1,IL1RN,IL6,IRF7,ISG15,ITGAX,MARCO,MKI67,MMP14,MMP8,MSR1,OLR1,RSAD2,S100A8,Saa3,SERPINE1,SOCS3,SPP1,TFEC,TIMP1,TLR2
IL1		group	Activated	4.584	2.64e-14	ADAMTS4,AREG,CCL2,Ccl2,CDKN1A,CFB,CLEC7A,CSF2RB,CTSB,CXCL10,CYP1A1,FN1,FST,HMOX1,IL1RN,IL6,ITGAM,ITGB2,KYNU,MMP13,MMP3,S100A9,Saa3,SERPINE1,SOCS3,TIMP1,TLR2,TLR7,TNC,TNFRSF1B,VCAN
TNFSF12	-0.056	cytokine	Activated	4.625	3.7e-17	BST1,CCL2,Ccl2,CCL3L3,Ccl7,Ccl9,CCR1,CCR5,CD68,CLEC4D,CLEC4E,CXCL10,IL6,ITGAM,KLF15,MMP12,MMP13,MMP3,PF4,S100A8,S100A9,TIMP1,TNFRSF12A
NOS2	0.129	enzyme	Activated	4.814	3.87e-22	ACTC1,BCL2A1,BIRC5,CCL2,Ccl2,CCL3L3,Ccl7,Ccl9,CD14,CD53,CD80,CDKN1A,CFD,CLEC4D,CYP2E1,HMOX1,IL1RN,IL6,IRS1,ISG15,KDR,LCN2,LILRB4,MYH6,Orm1 (includes others),S100A8,Saa3,SERPINA3,SLFN12L,Slfn2,TIMP1,TNNT2,TYROBP
CHUK	0.08	kinase	Activated	4.893	2.35e-17	Acp5,CCL2,Ccl2,CCL3L3,Ccl9,CCR1,CDKN1A,CH25H,CTSB,CTSZ,CXCL10,CXCL13,CYBA,CYP7B1,EREG,HMOX1,IFI16,IL1RN,IL6,ISG15,LCN2,MMP13,MMP3,Mt2,PLAU,PLD3,Saa3,Slfn2,SOCS3,SPP1,TNFRSF1B
TLR3	0.343	transmembrane receptor	Activated	4.933	1.56e-17	ADAMTS4,CCL2,Ccl2,CCL3L3,Ccl7,CD80,CFB,CTSK,CXCL10,Hamp/Hamp2,HMOX1,IFI16,IL1RN,IL6,IRF7,ISG15,LCN2,LILRB4,LIPA,Mx1,OAS1,RGS1,RSAD2,S100A8,Saa3,SERPINE1,SOCS3,Stfa2/Stfa2l1,TIMP1,TLR7,TNC,TNFRSF1B
EGF	0.156	growth factor	Activated	4.998	3.79e-14	AREG,BIRC5,Ccl2,CCL27,CDK1,CDKN1A,CTSD,CXCL13,CYP1A1,EREG,FN1,FST,HAS2,HMOX1,IGFBP3,IL6,IL7R,IRS1,ITGAM,LCN2,LTF,MMP12,MMP13,MMP3,MUC5B,NR4A2,PBK,PLAU,PTPRN,RRM1,S100A9,SEMA6A,SERPINA3,SERPINE1,SOCS3,SPP1,TGM1,THBS1,TIMP1,TNC,TNFRSF12A,VCAN
IL1B	0.975	cytokine	Activated	5.055	8.77e-37	ADAMTS4,ADM,ANXA1,APOC2,ARG1,BCL2A1,CCL2,Ccl2,CCL27,CCL3L3,Ccl7,Ccl9,CCR1,CCR2,CCR5,CD14,CD80,CDKN1A,CFB,CSF2RB,CTSB,CTSS,CTSZ,CXCL10,CXCL13,CYBA,CYBB,CYP1A1,CYP2E1,DDIAS,F13A1,FABP5,FCGR2B,FGG,FN1,FST,GRIA1,GUSB,Hamp/Hamp2,HAS2,HEXA,HEXB,HMOX1,HPGDS,HSPA1A/HSPA1B,IFI16,IGFBP3,IL1RN,IL6,IRF7,IRS1,ISG15,ITGAM,KDR,LCN2,MMP12,MMP13,MMP14,MMP3,MMP8,Mt2,MUC5B,NR1D1,NR4A2,OAS2,OLR1,PLAU,PLD3,PTPRN,RSAD…
IL6	1.074	cytokine	Activated	5.116	5.14e-42	Acp5,ADAMTS4,ADGRE1,ADM,AKR1B10,ANXA1,AREG,ARG1,BIRC5,BMP6,CCL2,Ccl2,CCL3L3,CCNA2,CCNB2,CCR1,CCR2,CCR5,CD14,CD53,CD68,CD80,CDK1,CDKN1A,CDKN3,CFD,CLEC10A,CLEC4E,CSF2RB,CTSK,CXCL10,CXCL13,CYBB,CYP1A1,CYP2E1,EREG,FCGR1A,FGG,FN1,GADD45G,GLRX,GREM1,Hamp/Hamp2,HMOX1,IFI16,IGFBP3,IL1RN,IL6,IL7R,IRS1,ITGAM,KDR,KIF11,LCN2,LGALS1,LPL,LRG1,LTF,LY86,mir-8,MKI67,MMP12,MMP13,MMP3,MMP8,MSR1,Mt2,Orm1 (includes o…
Interferon alpha		group	Activated	5.329	1.67e-18	BCL2A1,C3AR1,CCL2,CCR1,CCR5,CD80,CDKN1A,CH25H,CSF2RB,CXCL10,CYP2E1,EPSTI1,FCGR1A,FCGR2B,HSPA1A/HSPA1B,IFI16,IL1RN,IL6,IL7R,IRF7,ISG15,ITGAM,LILRB4,MMP3,Mx1,OAS1,OAS2,PHF11,RSAD2,S100A9,SIGLEC1,SLAMF7,SLFN12L,SLFN13,Slfn2,SOCS3,TGM1,TLR2,TLR7,TLR8,TNFSF18,ZBP1
AGT	-0.001	growth factor	Activated	5.653	1.61e-15	ADGRE1,ADM,ANXA1,BMP6,CCL2,Ccl2,CCL3L3,Ccl7,CCR5,CD14,CDK1,CDKN1A,CTSS,CXCL10,CYBA,CYBB,CYP2E1,EDNRB,EREG,FCGR1A,FN1,HAS2,HMOX1,HSPA1A/HSPA1B,IFI16,IGFBP3,IL6,KDR,LCN2,MSR1,MYH6,NR4A2,OLR1,PLAU,SEMA6A,SERPINA3,SERPINE1,SIGLEC1,SOCS3,SPP1,TIMP1,TNFRSF12A,TNFRSF1B
CSF2	0.402	cytokine	Activated	5.667	6.43e-31	ALOX5AP,ANLN,ANXA1,ARG1,ATP6V0D2,BCL2A1,BIRC5,CCL2,Ccl2,CCL3L3,CCNA2,CCR1,CCR2,CCR5,CD14,CD180,CD63,CD80,CDK1,CDKN1A,CLEC4E,CLEC6A,CLEC7A,COL8A1,CSF2RB,CXCL10,CYBB,FCGR1A,FCGR2B,FOLR2,GUSB,HAS2,HMOX1,IL1RN,IL6,ITGAM,ITGAX,KIF11,LY9,MARCO,MKI67,MMP14,MMP8,NR4A2,NUSAP1,OLR1,PLAU,PRC1,PTGER4,RACGAP1,Saa3,SLAMF7,SLC7A11,Slfn2,SOCS3,SPP1,TGFBI,THBS1,TLR2,TNFRSF1B,TOP2A,TPX2,UBE2C
IFNG	-0.142	cytokine	Activated	6.214	1.38e-48	ACSS1,ADM,ALOX5AP,AREG,ARG1,BCL2A1,BMP6,BST1,C1QA,C1QB,C1QC,CCL2,Ccl2,CCL3L3,Ccl6,Ccl7,Ccl9,CCNA2,CCR1,CCR2,CCR5,CD14,CD63,CD68,CD72,CD80,CDK1,CDKN1A,CFB,CH25H,CLEC10A,CLEC4E,CLEC5A,CLEC7A,COL5A2,CSF2RB,CTSB,CTSD,CTSK,CTSS,CTSV,CTSZ,CXCL10,CXCL16,CXCL17,CYBA,CYBB,CYP2E1,DDIAS,EDNRB,FABP5,FCER1G,FCGR1A,FCGR2A,FCGR2B,FCGR3A/FCGR3B,FGG,FN1,GNAO1,GRIA1,GUSB,H2AC7,HAS2,HMOX1,HSPA1A/HSPA1B,IFI16,IFI30,…
TNF	0.953	cytokine	Activated	6.993	1.84e-43	Abcb1b,Acp5,ADAMTS4,ADM,AKR1B10,ALOX5AP,ANXA1,APOC2,ARG1,BCL2A1,BIRC5,BMP6,C3AR1,CCL2,Ccl2,CCL27,CCL3L3,Ccl6,Ccl7,Ccl9,CCN4,CCR1,CCR2,CCR5,CD14,CD80,CDKN1A,CFB,CFD,CH25H,CLDN4,CLEC4E,CLEC5A,CNN1,COTL1,CSF2RB,CTSB,CTSK,CTSS,CTSZ,CXCL10,CXCL13,CXCL16,CYBA,CYBB,CYP1A1,CYP2E1,CYP7B1,DDIAS,EDNRB,EREG,FABP5,FCER1G,FCGR2B,FGG,FMO1,FN1,FST,GADD45G,GRIA1,GUSB,Hamp/Hamp2,HAS2,HEXA,HEXB,HMOX1,HPGDS,HSPA1A/H…
SB203580		chemical - kinase inhibitor	Inhibited	-5.404	2.56e-21	Acp5,ADAMTS4,ALOX5AP,ANXA1,ARG1,BIRC5,C3AR1,CCL2,Ccl2,Ccl7,CD109,CD80,CDK1,CDKN1A,CTSK,CXCL10,CYP1A1,EDNRB,EREG,FN1,GLRX,HAS2,HMOX1,IGFBP3,IL1RN,IL6,IRF7,ISG15,ITGAM,KDR,LIPF,MMP12,MMP13,MMP3,MMP8,MUC5B,OLR1,PLA1A,PLAU,RNF149,SERPINE1,SLC15A3,SOCS3,SPP1,TGM1,THBS1,TIMP1,TLR2
N-acetyl-L-cysteine		chemical drug	Inhibited	-4.799	1.91e-11	Abcb1b,Acp5,ADGRE1,ADM,BCL2A1,CCL2,Ccl2,CCR2,CCR5,CD80,CDKN1A,CTSK,CXCL10,CYBA,CYBB,HMOX1,IL6,ITGAM,LPL,MSR1,PLAU,SERPINE1,SPP1,TNC
Alpha catenin		group	Inhibited	-4.406	2e-12	ADAMTS4,AREG,COL5A2,CTSB,CTSV,CXCL10,EREG,IL6,ITGAM,MMP12,MMP13,MMP19,PLAU,S100A8,S100A9,Saa3,SOCS3,TIMP1,TNC,TNFRSF12A
LY294002		chemical - kinase inhibitor	Inhibited	-4.395	1.62e-12	ALOX5AP,BIRC5,CCL2,Ccl2,CCNA2,CCR1,CCR2,CD14,CDKN1A,CLDN4,CXCL10,CXCL16,CYP2E1,EREG,FN1,HAS2,HMOX1,IGFBP3,IL1RN,IL6,IRS1,ITGAM,LCN2,MMP13,MMP14,NDC80,NR4A2,P2RY6,PLAU,RGS1,SERPINE1,SOCS3,SPP1,THBS1,TLR2,TNFRSF1B,TOP2A,UBE2C,VCAN
sirolimus		chemical drug	Inhibited	-4.37	5.85e-17	Acp5,ADM,ARG1,ATP6V0D2,BCL2A1,BEX1,BIRC5,Ccl2,CCL3L3,CCNA2,CCNB2,CCR5,CD68,CD80,CDK1,CDKN1A,CFD,CTSK,CYP2E1,FN1,GRIA1,Hamp/Hamp2,HMGCS2,HMOX1,IL6,IRF7,IRS1,ISG15,KDR,LCN2,LGALS3,LILRB4,mir-181,mir-8,MKI67,MMP13,MMP14,MMP3,MYH6,PLAU,PLIN2,RPL10,RPS2,SERPINE1,SOCS3,TIMP1,TOP2A
PD98059		chemical - kinase inhibitor	Inhibited	-4.258	1.2e-20	ALOX5AP,ANXA1,AREG,BIRC5,CCL2,Ccl2,CCL3L3,CCNA2,CCR1,CCR2,CD14,CDKN1A,CTSB,CTSK,CXCL10,CYP1A1,EDNRB,EREG,FN1,GRIA1,HAS2,HMOX1,IGFBP3,IL1RN,IL6,ITGAM,ITGAX,ITGB2,LIPF,LPL,MKI67,MMP12,MMP13,MMP14,MMP3,MSR1,MUC5B,NOP56,PLA1A,PLAU,PTAFR,RGS1,RPS2,S100A8,SERPINE1,SOCS3,SPP1,SPRR1A,THBS1,TIMP1,TLR2,TOP2A,VCAN
wortmannin		chemical - kinase inhibitor	Inhibited	-4.066	2.69e-08	BIRC5,CCL2,Ccl2,CD14,CDKN1A,CXCL10,CXCL16,CYP2E1,FN1,HAS2,HMOX1,IL6,IRS1,ITGAM,MMP14,MSR1,PLAU,SERPINE1,SOCS3
levodopa		chemical - endogenous mammalian	Inhibited	-3.962	0.0306	C1QA,CD63,COTL1,CTSB,CTSZ,CYTH4,EDNRB,Fcrls,GUCY1A1,H2AX,HEXA,HEXB,MMP14,MSRB1,P2RY6,PDZD2,PLD4,PLEK,PSAP,SH3PXD2B,SLAMF9,SLC29A3,SYNE1
SRF	-0.073	transcription regulator	Inhibited	-3.916	5.63e-06	ACTC1,CD177,CDKN1A,CNN1,FST,GADD45G,GDA,GSN,HMOX1,ITGAM,KDR,LCN2,LPL,LTF,MYH6,NR4A2,S100A8,S100A9,Saa3,TNC,TNNT2,VCAN
U0126		chemical - kinase inhibitor	Inhibited	-3.816	4.34e-12	ADAMTS4,ADGRE1,AREG,BIRC5,BMP6,CCL2,Ccl2,CCL3L3,CCN4,CCR2,CDKN1A,CLDN4,CXCL10,CYBB,CYP1A1,CYP2E1,EDNRB,EREG,FMO3,FN1,GRIA1,GSN,HMOX1,IL6,KDR,LPL,MMP12,MMP13,MMP3,MUC5B,NR4A2,PLAU,S100A9,SERPINE1,SOCS3,SPP1,SPRR1A,THBS1,TLR2
immethridine		chemical reagent	Inhibited	-3.742	5.4e-17	Ccl2,Ccl7,CCR5,CD14,CTSS,FCGR1A,IFI16,IL6,LCN2,OLR1,SERPINA3,SIGLEC1,SOCS3,SPP1
ZFP36	0.018	transcription regulator	Inhibited	-3.656	7.75e-11	CCL3L3,CDKN1A,CTSS,CYBB,IL6,KIF11,LCN2,LTF,NUF2,PBK,PLAU,PRC1,S100A8,S100A9,SPP1,TOP2A
Irgm1	0.649	other	Inhibited	-3.558	6.47e-12	Ccl2,CCNA2,CCNB2,CXCL10,IFI16,Ifi27l2a/Ifi27l2b,IL6,IRF7,LILRB4,MKI67,OAS2,RSAD2,UBE2C
TP73	-0.114	transcription regulator	Inhibited	-3.533	3.04e-18	BIRC5,CCL2,Ccl2,Ccl6,Ccl9,CCNA2,CCNG1,CDK1,CDKN1A,CDKN3,CLEC7A,COL5A2,CTSD,CXCL10,EREG,FN1,FST,GPNMB,GTSE1,HPSE,HSPA1A/HSPA1B,IGFBP3,IL6,ITGAX,LRG1,mir-8,MMP13,MMP14,MMP19,MYOZ2,PLAU,RAB7B,SERPINA3,SERPINE1,SPP1,THBS1,TIMP1,TNFRSF12A,TNFRSF1B,TPX2,TREM2,UBE2C,Wfdc17
l-asparaginase		biologic drug	Inhibited	-3.45	1.24e-05	BIRC5,CCNA2,CCNB2,CDK1,CDKN1A,Hamp/Hamp2,KIF11,KNL1,NDC80,NUF2,TOP2A,UBE2C
curcumin		chemical drug	Inhibited	-3.402	3.08e-09	ADAMTS4,BIRC5,CCL2,Ccl2,CD80,CDK1,CDKN1A,CLDN4,CYP1A1,CYP2E1,F7,HMOX1,HSPA1A/HSPA1B,IL6,IRS1,ITGAM,LPL,MMP13,MMP14,MMP3,OLR1,PLAU,SERPINE1,SOCS3,TLR2,TOP2A
CBX5	-0.214	transcription regulator	Inhibited	-3.317	2.91e-06	BIRC5,C15orf48,CD68,CDKN1A,CEMIP,H1-2,LCN2,OAS1,OLR1,SERPINA3,SLC7A8,TGFBI
TRIM24	-0.005	transcription regulator	Inhibited	-3.148	7.85e-06	CXCL10,EPSTI1,Ifi27l2a/Ifi27l2b,IRF7,ISG15,LGALS3,OAS1,PHF11,SERPINE1,SPP1,TGFBI,TLR2
losartan potassium		chemical drug	Inhibited	-3.126	5.15e-05	Ccl2,CXCL10,CYBB,FN1,IL6,OLR1,SERPINE1,SOCS3,SPP1,TIMP1
pyrrolidine dithiocarbamate		chemical reagent	Inhibited	-3.115	4.47e-09	ANXA1,BCL2A1,CCL2,Ccl2,CCR2,CCR5,CD80,CXCL10,HMOX1,IL6,IRF7,MMP13,MMP14,SERPINE1,TLR2
diphenyleneiodonium		chemical reagent	Inhibited	-3.045	1.57e-10	Abcb1b,ALOX5AP,CCL2,Ccl2,CLDN4,FN1,HMOX1,IL6,MMP12,MMP13,PDE5A,SERPINE1,TIMP1
tyrphostin AG 1478		chemical - kinase inhibitor	Inhibited	-2.971	9.82e-06	AREG,CCL2,CDKN1A,COL8A1,HAS2,IL6,ITGAM,MMP13,PLAU
BCL6	-0.093	transcription regulator	Inhibited	-2.966	2.91e-07	BCL2A1,CCL2,Ccl2,CCL3L3,Ccl6,Ccl7,CD72,CD80,CDKN1A,CLEC10A,CTSK,CXCL10,IL6,IL7R,RGS4,SERPINE1,SH3PXD2B,SOCS3,TIMP1
vitamin E		chemical drug	Inhibited	-2.95	3.02e-06	CCL2,Ccl9,CD53,CDKN1A,Hamp/Hamp2,LPL,MMP14,SERPINE1,SPP1
JQ1		chemical reagent	Inhibited	-2.9	4.39e-06	Acp5,Ccl2,CCNA2,CLEC10A,H1-2,IL6,ISG15,MKI67,OR5V1,SLC7A11,TLR2,TOP2A
AG490		chemical - kinase inhibitor	Inhibited	-2.896	0.000138	BIRC5,CCL2,Ccl2,CD68,CDKN1A,IL6,SOCS3,SPP1,TIMP1
SP600125		chemical - kinase inhibitor	Inhibited	-2.828	1.28e-15	Abcb1b,ADAMTS4,ADM,CCL2,Ccl2,CD80,CDK1,CDKN1A,CLDN4,COL8A1,CXCL10,CXCL16,CYP1A1,FABP5,FN1,H2AX,HMOX1,IL6,IRS1,ISG15,LAMA1,MAFB,MMP12,MMP13,MMP3,MUC5B,MYH6,RGS4,Saa3,SERPINE1,SOCS3,SPP1,THBS1,TNNT2
MXD1	0.016	transcription regulator	Inhibited	-2.828	0.000481	CCNA2,CCNB2,CCNG1,CDK1,ITGAX,NOP56,RPS2,TOP2A
hydroxypropyl-beta-cyclodextrin		chemical drug	Inhibited	-2.795	1.53e-08	CCL3L3,CD68,CTSB,CTSD,GUSB,IL6,ITGAX,LIPA
CORT	-0.084	other	Inhibited	-2.795	4.12e-07	Ccl2,CCL3L3,Ccl7,CCR1,CCR2,CCR5,CXCL10,IL6
Y 27632		chemical drug	Inhibited	-2.76	0.000115	CCL2,Ccl2,CDKN1A,HAS2,IL6,PLAU,SERPINE1,THBS1
PTX3	0.35	other	Inhibited	-2.753	2.39e-07	CCL2,Ccl2,CCL3L3,Ccl7,CCR2,CCR5,IL6,TLR2
estriol		chemical - endogenous mammalian	Inhibited	-2.714	1.55e-09	CCL2,Ccl2,CCL3L3,Ccl7,CCR1,CXCL10,IL1RN,IL6,IRS1,ITGB2,TLR7
medroxyprogesterone acetate		chemical drug	Inhibited	-2.706	3.62e-12	ANLN,BIRC5,C15orf48,CCL2,Ccl2,CCNB2,CCR5,CDK1,CXCL10,CYP1A1,DEPDC1,FN1,IL6,ITGB2,KIF11,NUSAP1,PBK,PLAU,PRC1,TNC,VCAN
atorvastatin		chemical drug	Inhibited	-2.682	3.64e-06	BMP6,CCL2,Ccl2,CYBA,CYBB,HMOX1,IL6,ITGB2,LPL,MMP3,OLR1,RGS1,SERPINE1,SPP1,TLR2,TMEM106A
1810019D21Rik	-0.575	other	Inhibited	-2.673	3.78e-11	Abcb1b,APOBEC1,AREG,CCNG1,CDKN1A,COL8A1,EDA2R,FST,ITGB2,PLA2G7,PLAU,S100A8,SLC7A11,SYNE1
vismodegib		chemical drug	Inhibited	-2.646	7.29e-08	ADGRE1,Ccl2,CD14,CD68,IL6,LGALS3,MKI67
KDM5B	-0.284	transcription regulator	Inhibited	-2.646	0.00821	CDK1,ECT2,FABP5,FST,ISG15,NDC80,PBK,TOP2A
SP110	0.347	transcription regulator	Inhibited	-2.646	0.0292	CTSB,CXCL10,OAS1,PDGFC,PTAFR,TBX3,TIMP1
H89		chemical - kinase inhibitor	Inhibited	-2.639	4.93e-07	ANXA1,AREG,Ccl2,CD14,CD80,CDKN1A,EREG,HMOX1,IL6,MKI67,MMP13,NR4A2,PLAU,S100A8,SERPINE1
Rb		group	Inhibited	-2.63	2.69e-05	BIRC5,CCL2,CCNA2,CDK1,CDKN1A,CYP1A1,ECT2,MMP3,TOP2A
NS-398		chemical reagent	Inhibited	-2.608	0.00018	Abcb1b,ARG1,BIRC5,CDKN1A,IL6,MMP14,S100A8,S100A9,SPP1
acetovanillone		chemical drug	Inhibited	-2.607	7.31e-06	Abcb1b,CCL2,CXCL10,HMOX1,MSR1,OLR1,SERPINE1
tanespimycin		chemical drug	Inhibited	-2.606	0.0107	BCL2A1,BIRC5,CDK1,CDKN1A,HSPA1A/HSPA1B,PLAU,SERPINE1
EGLN		group	Inhibited	-2.597	0.000721	ADM,ANKRD37,CCL2,Ccl2,H2AC11,Hamp/Hamp2,LCN2,MMP13,Orm1 (includes others),S100A9,SERPINE1
eplerenone		chemical drug	Inhibited	-2.595	2.39e-07	Ccl2,CD68,CYBA,CYBB,FN1,LGALS3,SERPINE1,SPP1
Sn50 peptide		chemical toxicant	Inhibited	-2.592	0.000284	BCL2A1,BIRC5,Ccl2,CXCL10,HMOX1,IL6,SERPINE1
fingolimod		chemical drug	Inhibited	-2.57	5.15e-07	CCL2,Ccl2,Ccl7,CCR2,CD80,CDKN1A,CXCL10,CXCL13,FN1,IL6,SERPINE1
epigallocatechin-gallate		chemical drug	Inhibited	-2.565	1.58e-08	BIRC5,CCL2,CCL3L3,Ccl7,CDKN1A,CTSK,CXCL10,FN1,HMOX1,IL6,ISG15,KDR,MKI67,MMP13,MMP3,MUC5B,NR4A2,PLAU,SERPINE1,TIMP1
Tcf7	0.182	transcription regulator	Inhibited	-2.534	0.0282	CCL3L3,CCR2,CDK1,GNAO1,IL7R,KIF11,LPCAT2,Prg4,PSAP,SOCS3
troglitazone		chemical drug	Inhibited	-2.533	2.11e-07	BIRC5,CCL2,Ccl2,CD80,CDKN1A,CFD,CXCL10,CYP1A1,ECT2,FABP5,FN1,HMOX1,IFI16,IL6,IRS1,LPL,MKI67,MMP3,MSR1,NUF2,PLIN2,RACGAP1,SERPINE1,SPP1,TFF2
TRPS1	0.605	transcription regulator	Inhibited	-2.53	1.41e-07	CCNA2,CCNB2,CDK1,DPEP2,FN1,KIF11,MMP13,SEMA6A,TOP2A,TPX2
RB1	-0.773	transcription regulator	Inhibited	-2.518	0.00763	ACTC1,BIRC5,CCL3L3,CCNA2,CDK1,CDKN1A,FN1,FST,H2AX,IL6,INMT,KDR,mir-8,MYH6,RRM1,SERPINE1,SH3BP2,TNNT2,UBE2C
Sb202190		chemical - kinase inhibitor	Inhibited	-2.501	2.06e-07	BIRC5,CCL2,Ccl2,Ccl9,CDKN1A,CXCL10,CYP1A1,FN1,HMOX1,IL6,MMP13,S100A8,SERPINE1,TGM1
SB-431542		chemical reagent	Inhibited	-2.5	5.1e-09	ATP1A2,BMP6,Ccl2,Ccl7,CCR2,CD14,CXCL13,CYP1A1,FN1,FOLR2,FST,MAFB,SCN7A,SERPINE1,SPP1,TNFRSF12A
CDKN1A	1.452	kinase	Inhibited	-2.468	3.01e-13	ANLN,BIRC5,CCL2,CCL3L3,CCNA2,CDK1,CDKN1A,CDKN3,CTSB,CTSK,FN1,H2AX,HSPA1A/HSPA1B,IL6,ITGAM,LGALS3,MKI67,MMP3,NUSAP1,PBK,PRC1,PSAP,RACGAP1,RRM1,SERPINE1,TGM1,TOP2A,TPX2,UBE2C
elovanoid N32		chemical - endogenous mammalian	Inhibited	-2.449	3.78e-06	CDKN1A,IL6,MMP12,MMP13,MMP3,MMP8
elovanoid N34		chemical - endogenous mammalian	Inhibited	-2.449	5.2e-06	CDKN1A,IL6,MMP12,MMP13,MMP3,MMP8
ZC3H12C	0.008	other	Inhibited	-2.449	3.16e-05	CCR2,CCR5,CLEC4E,MPEG1,PLA2G7,TLR8
SERPINE2	0.799	other	Inhibited	-2.449	0.000164	Ccl2,Ccl9,CXCL10,CXCL13,IL6,ITGB2
SFTPA1	-0.437	transporter	Inhibited	-2.449	0.00462	Ccl2,CXCL10,GUCY1A1,IL6,PLIN2,SERPINE1
miR-146a-5p (and other miRNAs w/seed GAGAACU)		mature microRNA	Inhibited	-2.433	0.0132	CCL2,CCNA2,CDKN3,IL6,LTF,PTAFR
HRH3	0.105	G-protein coupled receptor	Inhibited	-2.425	1.62e-07	CFD,CLEC4D,CXCL10,GDA,PCOLCE2,S100A8,S100A9,SERPINA3,VCAN
IL27RA	0.083	transmembrane receptor	Inhibited	-2.425	0.0001	CCR5,CD80,CXCL10,CXCL13,IL6,SOCS3
RBL1	0.552	transcription regulator	Inhibited	-2.425	0.0043	CCNA2,CDK1,CDKN1A,mir-8,RRM1,THBS1
Bay 11-7082		chemical - kinase inhibitor	Inhibited	-2.416	1.87e-05	Abcb1b,BCL2A1,CCL2,Ccl2,CCL3L3,CCR2,HMOX1,IL6,TLR2
BACH2	-0.516	transcription regulator	Inhibited	-2.414	0.000703	FAM20C,HMOX1,IL6,MAFB,S100A8,S100A9
CTLA4	0.584	transmembrane receptor	Inhibited	-2.4	0.000254	CCNA2,CD80,CXCL10,ITGAX,MKI67,TOP2A,TPX2
ADA	0.301	enzyme	Inhibited	-2.396	9.61e-07	Ccl2,IL6,MMP12,PDE5A,SERPINE1,SPP1,TIMP1
TAF4	-0.172	transcription regulator	Inhibited	-2.395	1.19e-06	AREG,GREM1,IL1RN,MMP13,MMP3,OAS1,PBK,PDGFC,SPP1,SPRR1A,TGM1,THBS1
APOA1	-0.093	transporter	Inhibited	-2.369	0.000703	Ccl2,CCR2,CYBB,IL6,ITGAM,TLR2
rottlerin		chemical - kinase inhibitor	Inhibited	-2.366	8.24e-05	BIRC5,Ccl2,CDK1,CDKN1A,CLDN4,HMOX1,LPL,MMP13
PTPN6	0.57	phosphatase	Inhibited	-2.36	1.08e-05	BIRC5,Ccl2,CCL3L3,CYBB,FN1,IL6,ITGB2,TIMP1
Ro31-8220		chemical - kinase inhibitor	Inhibited	-2.348	0.000337	CCL2,CDKN1A,FN1,HMOX1,IL6,SERPINE1
Nr1h		group	Inhibited	-2.345	1.5e-05	APOC2,BMP6,CCL2,Ccl2,CCL3L3,CCR2,CCR5,CLEC4E,CXCL10,IL6,LPL,SLFN12L,THBS1
MACROH2A1	0.094	other	Inhibited	-2.345	6.43e-05	CDKN1A,FN1,IL6,IRF7,IRS1,LPL,PLAU,SERPINE1,TBX3
miR-199a-5p (and other miRNAs w/seed CCAGUGU)		mature microRNA	Inhibited	-2.339	2.39e-05	ALOX5AP,BIRC5,CDKN1A,CSTB,FN1,ISG15,LCN2,RSAD2,ZBP1
trans-hydroxytamoxifen		chemical drug	Inhibited	-2.339	0.0137	ADM,AREG,CCNA2,CYBA,FN1,IFI30,KYNU,PLAU,TOP2A
estrogen receptor		group	Inhibited	-2.274	9.04e-07	ANXA1,CD68,CLDN4,CYP1A1,EREG,FGFR4,FN1,HSPA1A/HSPA1B,IL6,IRS1,LTF,mir-181,mir-8,MMP14,PDGFC,PLAU,SERPINE1,TIMP1,TNC
PP2/AG1879 tyrosine kinase inhibitor		chemical - kinase inhibitor	Inhibited	-2.266	6.75e-08	CCL2,CDKN1A,CXCL16,FN1,GRIA1,HMOX1,IL6,ITGAM,MMP13,PLAU,SERPINE1,SPP1
mifepristone		chemical drug	Inhibited	-2.242	6.08e-11	ADM,ANXA1,AREG,ARG1,C1QB,CCL2,Ccl2,CCR2,CD14,CDKN1A,COL5A2,CTSD,CYBA,CYBB,EDNRB,FCGR2B,FST,HAS2,IGFBP3,IL6,ITGAM,LTF,MMP3,S100A6,Saa3,SERPINE1,SPP1,TIMP1,VCAN
minocycline		chemical drug	Inhibited	-2.24	7.34e-05	ADGRE1,Ccl2,CCR2,CYBB,IL6,ITGAM,ITGAX,TNFRSF1B
LRBA	-0.199	other	Inhibited	-2.236	1.43e-05	Ccl2,CCL3L3,CXCL10,IL6,OAS1
salirasib		chemical drug	Inhibited	-2.236	0.00442	ADM,COL5A2,LGALS1,PLAU,SERPINE1
CLOCK	-0.131	transcription regulator	Inhibited	-2.236	0.112	CEMIP,F7,GNAO1,HAS2,HMGCS2,NR1D1,PTAFR,RGS5,THBS1
NAB2	-0.319	transcription regulator	Inhibited	-2.219	6.71e-05	ALOX5AP,CDKN1A,FN1,MMP3,PLAU
metformin		chemical drug	Inhibited	-2.216	0.000487	ARG1,CCL2,FN1,GLP1R,HMOX1,IL1RN,IL6,IRS1,MUC5B,PLIN2,SERPINE1
calphostin C		chemical - kinase inhibitor	Inhibited	-2.213	9.82e-06	BIRC5,CCL2,CDKN1A,IL6,LPL,MMP13,MSR1,PLAU,S100A8
SCGB1A1	-0.012	cytokine	Inhibited	-2.213	5.13e-05	FN1,ITGB2,MMP14,S100A8,S100A9
candesartan		chemical drug	Inhibited	-2.208	7.76e-06	ADM,Ccl2,FN1,IL6,MMP14,OLR1,SERPINE1,SPP1
flutamide		chemical drug	Inhibited	-2.201	0.0363	Ccl2,CYP1A1,IL6,KDR,MKI67
101.10 peptide		chemical reagent	Inhibited	-2.2	2.04e-05	Ccl2,IL1RN,IL6,MMP13,MMP3
irbesartan		chemical drug	Inhibited	-2.2	0.000435	CCL2,CYBB,IL6,ITGAM,SERPINE1
spironolactone		chemical drug	Inhibited	-2.2	0.0166	Ccl2,CDKN1A,EDNRB,FN1,IL6
CXCR2	0.728	G-protein coupled receptor	Inhibited	-2.191	5.13e-05	Ccl2,CCL3L3,CXCL10,IL6,MUC5B
CBL	0.112	transcription regulator	Inhibited	-2.19	0.000703	CCL3L3,CDKN1A,CSF2RB,FN1,HMOX1,IL6
N-cor		group	Inhibited	-2.186	3.23e-06	C1QA,CCR1,CDKN1A,CTSB,CTSS,CXCL10,FAM20C,IGFBP3,MMP12,MMP13,OLR1,PLIN2
CUX1		transcription regulator	Inhibited	-2.183	2.72e-08	CCNA2,CDKN1A,CXCL10,CYBB,ECT2,ITGB2,LILRB3,LTF,MMP8,RACGAP1,THBS1
PRDM16	-0.268	transcription regulator	Inhibited	-2.183	0.000119	CDKN1A,CXCL10,GADD45G,IRF7,OAS2,SERPINE1
obeticholic acid		chemical drug	Inhibited	-2.183	0.00301	Ccl2,CD68,FN1,IL6,TIMP1
FST	1.093	other	Inhibited	-2.183	0.00985	ATP1A2,FN1,FST,IL6,LTF
valsartan		chemical drug	Inhibited	-2.182	4.57e-06	Ccl2,CYBA,CYBB,FN1,IL6,SERPINE1,SPP1,TIMP1
2-aminopurine		chemical reagent	Inhibited	-2.179	3.85e-05	CXCL10,HMOX1,IL6,ISG15,OAS1
TREX1	0.237	enzyme	Inhibited	-2.178	2.83e-05	CXCL10,IFI16,Ifi27l2a/Ifi27l2b,ISG15,OAS1
mir-17	-0.254	microRNA	Inhibited	-2.174	0.00739	CDKN1A,FN1,H2AX,IL6,MMP13,THBS1
salicylic acid		chemical drug	Inhibited	-2.172	0.00442	CDK1,CXCL10,CYP2E1,IL6,OLR1
TFAP2C	-0.02	transcription regulator	Inhibited	-2.158	0.000143	ANLN,Ccl9,CDKN1A,FST,H1-2,MMP14,THBS1,TIMP1
Z-551		chemical reagent	Inhibited	-2.144	1.43e-05	ADGRE1,Ccl2,CD68,ITGAM,LPL
PTPN11	0.333	phosphatase	Inhibited	-2.14	5.74e-08	CCNG1,CD14,CD68,CDKN1A,CYBB,IL6,KDR,LTF,MMP12,MMP19,Pln,SOCS3
RNF31	-0.052	enzyme	Inhibited	-2.137	2.92e-08	AREG,CCL2,Ccl2,CCL3L3,Ccl6,Ccl7,Ccl9,CXCL10,CXCL13,CXCL16,IL1RN,IL6
SIRT1	-0.236	transcription regulator	Inhibited	-2.115	3.19e-08	ARG1,BIRC5,Ccl2,CCNB2,CD72,CDKN1A,CLEC10A,Csprs (includes others),CYP1A1,FN1,HMOX1,IL6,IRF7,LGALS3,MMP13,MMP3,Ms4a6b,NAIP,NR1D1,OAS1,OAS2,RSAD2,Sectm1b,SERPINE1,SLC7A10,SLC7A11,Slfn2,SOCS3
IL1RN	1.43	cytokine	Inhibited	-2.113	2.77e-08	CCL2,CTSS,CYP2E1,GRIA1,IL6,IRF7,OAS1,OAS2,RSAD2,S100A9,SERPINE1,SLC15A3,SPP1,TIMP1
PTGER4	1.065	G-protein coupled receptor	Inhibited	-2.069	1.28e-11	ADAMTS4,APOC2,CCL2,Ccl2,CCL3L3,Ccl7,CH25H,CXCL10,CYBB,HAS2,IFI16,IL6,IRF7,MAFB,MMP13,Mx1,OLR1,RSAD2,SLFN13,SPP1,TLR8
bisindolylmaleimide I		chemical - kinase inhibitor	Inhibited	-2.069	7.78e-07	BCL2A1,CDKN1A,FN1,HAS2,HMOX1,IL6,LPL,MMP12,MMP13,MYH6,NR4A2,SERPINE1,TNNT2
TCF3	-0.133	transcription regulator	Inhibited	-2.066	1.08e-10	ANLN,BIRC5,CCNA2,CCNB2,CCR2,CD200R1,CD200R1L,CDK1,CDKN1A,CDKN3,CIP2A,CTSV,ECT2,GRIA1,H2AX,IFI16,IL7R,KIF11,LILRB4,MKI67,NDC80,NUF2,NUSAP1,PRC1,PSAP,RACGAP1,SLAMF7,SOCS3,TCEAL9,TOP2A,ZBP1
resveratrol		chemical drug	Inhibited	-2.049	7.55e-11	BCL2A1,BIRC5,CCL2,Ccl2,CCL3L3,CD14,CD68,CDKN1A,CTSK,CXCL10,CYBB,CYP1A1,CYP2E1,FN1,HMOX1,IGFBP3,IL6,IL7R,ISG15,KDR,MMP13,MMP3,PLAU,SERPINE1,SPP1,TGM1
ADRB		group	Inhibited	-2.021	1.62e-05	ACSS1,ADAMTS4,ARG1,Ccl2,CCNA2,CD68,CDKN1A,CLEC4D,CXCL10,HMOX1,NR4A2,RSAD2,SLC7A11
ZMPSTE24	0.037	peptidase	Inhibited	-2.016	6.54e-06	Ccl6,CDKN1A,CTSV,FGFR4,GADD45G,IGFBP3,IL6,SOCS3
emodin		chemical drug	Inhibited	-2.01	1.73e-09	ARG1,BIRC5,Ccl2,CCR1,CDKN1A,CLDN4,CXCL10,CYP1A1,FN1,IL6,LPL,MKI67
VIP	-0.025	other	Inhibited	-2.001	0.00112	CCL2,Ccl2,CCL3L3,CD80,CXCL10,IL6,LGALS1,TLR8
SCGB3A2	-0.476	other	Inhibited	-2	3.71e-06	CTSD,CTSS,MMP12,MMP14
tiron		chemical reagent	Inhibited	-2	4.83e-05	CDKN1A,HMOX1,IL6,TNC
2-[[9-isopropyl-6-[[4-(2-pyridyl)phenyl]methylamino]purin-2-yl]amino]butan-1-ol		chemical - kinase inhibitor	Inhibited	-2	7.45e-05	Ccl2,CCL3L3,CCNA2,IL6
icilin		chemical reagent	Inhibited	-2	0.00011	Ccl2,CCL3L3,CXCL10,IL6
6-aminopyrazolopyrimidine derivative compound II		chemical - kinase inhibitor	Inhibited	-2	0.000156	CCL3L3,IL6,IRF7,ISG15
GLIS2	-0.473	transcription regulator	Inhibited	-2	0.000483	Ccl2,CXCL10,MMP14,SERPINE1
chelerythrine		chemical drug	Inhibited	-2	0.00136	Ccl2,CYBA,CYBB,IL6
plumbagin		chemical toxicant	Inhibited	-2	0.00136	BCL2A1,BIRC5,CYBB,IL6
HBB		transporter	Inhibited	-2	0.00175	Ccl2,CCL3L3,CXCL10,IL6,SERPINE1
BCAP31	0.341	transporter	Inhibited	-2	0.00222	ADGRE1,Ccl2,CCL3L3,CXCL10
ramipril		chemical drug	Inhibited	-2	0.00341	FN1,IL6,LAMA1,TIMP1
PDCD1	0.465	phosphatase	Inhibited	-2	0.00403	CCNA2,CD80,IL6,MKI67,TOP2A
RBPJ	0.293	transcription regulator	Inhibited	-2	0.00652	CDKN1A,ECT2,HAS2,IL6,IL7R,KDR,MMP13,MMP3,TNC
miR-450a-5p (and other miRNAs w/seed UUUGCGA)		mature microRNA	Inhibited	-2	0.00853	COL5A2,MMP3,SERPINE1,SPP1
fish oils		chemical drug	Inhibited	-2	0.0146	Ccl2,CCL3L3,CYP1A1,MMP12
PAX5-ELN		fusion gene/product	Inhibited	-2	0.0146	CD180,CYBB,IRS1,KDR
NUP98-DDX10		fusion gene/product	Inhibited	-2	0.0171	C3AR1,Ccl6,CLEC7A,MSR1
alefacept		biologic drug	Inhibited	-2	0.0198	CYBA,FCGR3A/FCGR3B,IL7R,SOCS3
SAFB	-0.194	other	Inhibited	-2	0.0228	CXCL10,HEXA,HMOX1,S100A8
maraviroc		chemical drug		-1.997	2.95e-05	Ccl2,CXCL10,MYH6,TNNT2
CEP-1347		chemical drug		-1.997	0.00061	Ccl2,CCL3L3,IL6,PLAU
mir-130	-0.596	microRNA		-1.987	0.00061	KDR,LCN2,LTF,MAFB
PON1	-1.011	phosphatase		-1.982	4.83e-05	CD68,HMOX1,IL6,MSR1
SAV1	0.038	other		-1.982	5.13e-05	BIRC5,CDKN1A,FN1,IL6,SPP1
B4GALNT1	-0.006	enzyme		-1.982	0.000156	C1QA,C1QB,C1QC,C3AR1
bisindolylmaleimide iv		chemical - kinase inhibitor		-1.982	0.00136	CYP2E1,IL6,ITGAM,MMP13
KL	0.061	enzyme		-1.982	0.00197	Ccl2,CYBB,IL6,IRF7,KDR
CIDEC	-0.841	other		-1.982	0.00853	CCL2,Ccl2,IL6,SERPINE1
SCD	0.55	enzyme		-1.982	0.00916	Ccl2,CCL3L3,CXCL10,IL6,LPL
propranolol		chemical drug		-1.982	0.0103	CYP1A1,IL6,LGALS12,Pln
SFRP1	0.828	transmembrane receptor		-1.982	0.0228	FN1,IL6,MMP3,SERPINE1
zofenopril		chemical drug		-1.98	3.71e-06	Ccl2,HMOX1,IL6,TIMP1
silibinin		chemical drug		-1.98	5.78e-05	BIRC5,CDK1,CDKN1A,FN1,IGFBP3,IL6,MMP3,PLAU
GHR	-0.433	transmembrane receptor		-1.98	6.15e-05	Ccl2,CDKN1A,IGFBP3,IL6,LPL,SOCS3,SPP1
MMP14	1.253	peptidase		-1.98	0.000512	CDKN1A,IL6,MMP14,Mx1,Saa3
CYP7A1	0.017	enzyme		-1.98	0.00161	Ccl2,CYP7B1,IL6,TIMP1
glucosamine		chemical - endogenous mammalian		-1.977	0.0244	CCL2,HAS2,IL6,MMP3
mir-146	-0.266	microRNA		-1.975	0.00939	CCL2,Ccl2,CXCL10,IL6
L-lactic acid		chemical - endogenous mammalian		-1.969	1.67e-05	CCL2,Ccl2,CCL3L3,IL6
FEM1A	-0.454	transcription regulator		-1.969	1.67e-05	Ccl2,CD68,CXCL10,IL6
piperine		chemical drug		-1.969	0.00011	IL6,MMP13,MMP14,MMP3
PSEN2	0.226	peptidase		-1.969	0.0048	C1QA,C1QB,C3AR1,CTSS,CTSZ,PRC1,TNXB
mir-19	-0.243	microRNA		-1.969	0.0103	CDKN1A,PSAP,THBS1,TLR7
LGR4	-0.33	transmembrane receptor		-1.965	0.0134	CD14,CXCL10,CYP2E1,IL6
mir-135	0.196	microRNA		-1.964	0.00298	ALOX5AP,Ccl7,MMP13,SPP1
U73122		chemical reagent		-1.964	0.0123	FN1,ITGAM,MMP13,MMP14
NGLY1	0.186	enzyme		-1.96	0.00695	CXCL10,Ifi27l2a/Ifi27l2b,OAS1,RSAD2
2-(4-acetoxyphenyl)-2-chloro-N-methylethylamine		chemical reagent		-1.953	0.0019	CCL2,Ccl2,CXCL10,IL6
CXCR3	0.035	G-protein coupled receptor		-1.951	0.000758	CXCL10,FN1,HMOX1,TNC
pifithrin alpha		chemical reagent		-1.949	0.00113	CCNG1,CDKN1A,CYP1A1,HMOX1
CASP8	0.428	peptidase		-1.947	2.3e-05	CCL3L3,CCR5,CD14,CXCL10,IL6,ISG15,MMP13,S100A9
mir-181	-1.183	microRNA		-1.945	0.0334	IL6,MMP13,MMP14,RGS5
PLA2G2D	-0.021	enzyme		-1.941	7.35e-11	ARG1,Ccl2,CCR2,CD68,IL6,ITGAM,ITGAX,S100A9
GPX1	0.953	enzyme		-1.941	3.8e-06	ADGRE1,Ccl2,CCL3L3,CD14,CXCL10,CYBB,GLRX,IL6
alvocidib		chemical drug		-1.935	0.00939	BIRC5,CCL2,CDKN1A,ITGAM
mir-155	0.007	microRNA		-1.931	2.1e-05	CCL2,CD68,CDKN1A,CXCL10,HMOX1,IL6,IRF7,MMP3,Mx1,SERPINE1,SOCS3
IL37		cytokine		-1.925	0.00061	CXCL10,IL1RN,IL6,TIMP1
SUMO3	0.405	other		-1.912	1.35e-05	CXCL10,CXCL16,IL6,IRS1,ISG15,MMP14,TNC
actinomycin D		biologic drug		-1.91	1.22e-10	Abcb1b,ADM,BCL2A1,BIRC5,CCL2,CDKN1A,CYP1A1,FN1,GDA,GUCY1A1,HMOX1,IL6,IL7R,IRS1,LPL,MMP12,MMP3,PLAU,RGS4,SERPINE1,SOCS3,SPP1,TLR2,TNFRSF1B
prednisolone		chemical drug		-1.897	0.0177	ARG1,CCL2,Ccl2,CTSB,CTSS,CXCL10,CYP1A1,IL6,ITGAM,SLC29A3,SPP1
NEUROG1	0.085	transcription regulator		-1.89	0.000479	BEX1,CEMIP,FN1,GREM1,HAS2,IL6,THBS1
KDM3B	-0.135	enzyme		-1.89	0.000919	CKAP2,DEPDC1,FN1,GTSE1,IRS1,KNL1,RACGAP1
mir-30	-0.963	microRNA		-1.875	0.0134	Ccl2,CDKN1A,IL6,SERPINE1
THRB	-0.408	ligand-dependent nuclear receptor		-1.824	1.75e-08	Acp5,CCL2,Ccl2,CCN4,CCR1,CFD,CLEC10A,CTSD,CXCL10,GSN,H1-2,IGFBP3,IL6,LPL,MMP13,MYH6,OR5V1,PTAFR,SERPINE1,SLC7A11,SPP1,TGFBI,TLR2
pentoxifylline		chemical drug		-1.823	3.9e-05	Ccl2,CCR5,CYBB,IL6,ITGAM,TIMP1
ERBB4	-0.11	kinase		-1.819	0.000481	CCL2,CDKN1A,COL5A2,HMOX1,SERPINA3,SOCS3,THBS1,TNC
ZBTB16	-1.245	transcription regulator		-1.813	1.13e-07	Ccl2,Ccl7,CCNA2,CCR2,CD14,CD180,CD200R1,CD200R1L,CDKN1A,CXCL10,F13A1,IL6,IL7R,LY86,PF4,SPP1
GPS2	-0.142	transcription regulator		-1.809	0.000434	Ccl2,CCL3L3,CD14,CDKN1A,CXCL10,FAM20C,IL6
miR-17-5p (and other miRNAs w/seed AAAGUGC)		mature microRNA		-1.801	0.00249	BIRC5,CDKN1A,H2AX,MMP3,RGS5,TLR7
DNASE2	0.431	enzyme		-1.798	1.28e-09	CH25H,CXCL10,GPNMB,Hamp/Hamp2,IRF7,ISG15,Mx1,OAS1,RSAD2,ZBP1
CISH	-0.326	other		-1.796	9.83e-09	ATP6V0D2,CCL3L3,CD14,CLEC4E,CLEC6A,CXCL10,GUSB,HMOX1,MMP8,OLR1,SLC7A11,SPP1,TGFBI
TSC2	-0.415	other		-1.793	1.47e-07	ANXA1,BEX1,BIRC5,Ccl2,CD68,CDKN1A,CXCL10,GPNMB,GSN,HMGCS2,HMOX1,IRS1,LGALS3,PLAU,S100A6
GFI1	0.008	transcription regulator		-1.784	0.0017	Ccl2,CD53,CDKN1A,GADD45G,GUSB,IL6,IL7R,MAFB,SERPINA3,SLFN13
HDL		complex		-1.782	0.000123	CCL2,Ccl2,CCR2,CD80,IL6,ITGAM,ITGB2
PTEN	0.055	phosphatase		-1.753	1.03e-09	ADM,ALOX5AP,ANXA1,ARG1,BEX1,BIRC5,CA3,Ccl2,CCNB2,CD80,CDKN1A,CFD,COL5A2,CTSB,CTSV,CTSZ,CXCL10,CXCL13,FGFR4,FN1,HEXB,HSPA1A/HSPA1B,IFI30,IGFBP3,IL6,INMT,ISG15,KDR,LGALS3,MKI67,MMP14,MMP3,NAIP,NR4A2,PF4,PLAU,RRM1,SERPINE1,SLC7A8,SOCS3,SPP1,THBS1,TMEM106A
STS		enzyme		-1.732	9.61e-07	ADGRE1,APOC2,Ccl2,CD68,HSPA1A/HSPA1B,IL6,IRS1
fulvestrant		chemical drug		-1.728	6.46e-06	AREG,BIRC5,CCL2,Ccl2,CCNA2,CDK1,CDKN1A,CTSD,CXCL10,GTSE1,GUCY1A1,H2AX,IRS1,KIF11,LPL,LTF,MYH6,RRM1,UBE2C
CTCF	-0.043	transcription regulator		-1.726	3.58e-06	Ccl2,CCL3L3,Ccl9,CD14,Cd52,CD68,CDKN1A,MMP14,MUC5B,SLC7A11,TLR2,TNFRSF12A
GATA3	-0.256	transcription regulator		-1.723	0.00035	ADM,CCR1,CCR2,CCR5,CDKN1A,FN1,IL6,IL7R,LAIR1,PTGER4,S100A8,S100A9,SPRR1A,TBX3,TGM1
NR0B2	-0.068	ligand-dependent nuclear receptor		-1.718	0.000235	ARG1,Ccl2,CDKN1A,CYP7B1,IL6,SERPINE1,SPP1,TIMP1
thioctic acid		chemical drug		-1.716	0.000557	CCL2,Ccl2,HMOX1,IL6,LPL,SLC7A11
PSMB11	-0.13	peptidase		-1.685	1.97e-14	Abi3bp,Ccl2,Ccl7,CHAD,CLDN4,CTSS,CTSV,CXCL17,Gm5431,HMOX1,HPSE,HSPA1A/HSPA1B,ITGAM,LAMA1,LGALS3,MMP3,NR4A2,THBS1,THBS3,TNFRSF12A,TNFRSF1B,VCAN
CHRNA7	0.388	transmembrane receptor		-1.673	2e-05	Ccl2,CDKN1A,CXCL10,IL1RN,IL6,ITGAM
SU6656		chemical toxicant		-1.664	8.43e-05	ADM,Ccl2,Ccl7,Mt2,NR4A2,SOCS3
herbimycin		chemical - kinase inhibitor		-1.664	0.000191	ARG1,IL6,IRS1,MMP13,PLAU,SERPINE1
MYOCD	-0.39	transcription regulator		-1.644	5.8e-05	ACTC1,CDKN1A,CNN1,ECM2,FN1,MYH6,MYL7,TNNT2,VCAN
ZNF281	0.065	transcription regulator		-1.633	4.79e-05	CCL2,CCL3L3,Ccl6,Ccl9,GADD45G,IL6
SUMO2	0.113	enzyme		-1.633	0.000191	CXCL16,IL6,IRS1,ISG15,MMP14,TNC
PTPN1	0.494	phosphatase		-1.633	0.000876	ADRA1A,Ccl7,CD80,IRS1,MARCO,Mx1
Go 6976		chemical - kinase inhibitor		-1.632	8.57e-06	BMP6,Ccl2,CDKN1A,CXCL10,CYBB,FN1,HMOX1,IL6,NR4A2
NR1H4	-0.114	ligand-dependent nuclear receptor		-1.629	0.000212	Abcb1b,ACSS1,APOC2,Ccl2,FABP5,IL6,ITGAM,LCN2,MMP3,Orm1 (includes others),SPP1,TIMP1
HDAC1	0.374	transcription regulator		-1.627	1.8e-05	Acp5,CCNA2,CCNB2,CDK1,CDKN1A,CTSK,FN1,H2AX,IL6,KDR,LCN2,Mt2,MYO1F,PLAU,S100A9,SERPINE1,SPP1,TOP2A
SOCS3	1.063	phosphatase		-1.626	4.87e-08	ARG1,Ccl2,CDKN1A,CXCL10,FCGR1A,IL1RN,IL6,IRS1,OAS1,OAS2,SOCS3,TNFRSF1B
IRF4	0.23	transcription regulator		-1.614	4.98e-08	Acp5,ARG1,Ccl2,CD68,CDK1,CTSS,CXCL10,IL1RN,IL6,IL7R,IRF7,ISG15,OAS1,PHF11,PTGER4,RGS1,SPP1,ZBTB20
15-deoxy-delta-12,14 -PGJ 2		chemical - endogenous mammalian		-1.597	2.24e-13	ADAMTS4,BIRC5,CCL2,Ccl2,CCNG1,CDKN1A,CTSB,CTSD,CXCL10,CXCL13,CYBB,FN1,GSN,HMOX1,IL6,ITGAM,KDR,MMP13,MMP3,MSR1,PLAU,SERPINE1,SOCS3,SPP1
NOSTRIN	-0.671	transcription regulator		-1.59	7.03e-05	Ccl2,FN1,IL6,KDR,PLAU,THBS1
HAND2	-0.037	transcription regulator		-1.585	8.61e-08	ACTC1,CCL2,CCL3L3,Ccl6,Ccl9,ECM2,GREM1,IL6,MYH6,MYL7,TNNT2
CD200	-0.084	other		-1.575	5.13e-05	CCL3L3,CD80,CLEC7A,IL6,TLR2
miR-291a-3p (and other miRNAs w/seed AAGUGCU)		mature microRNA		-1.571	0.0154	CDKN1A,IL6,NR4A2,PBK,PRC1,RNF149
LRP1	0.377	transmembrane receptor		-1.567	7.34e-07	ADGRE1,Ccl2,CCL3L3,CD14,CD68,CTSD,GRIA1,IL6,PLIN2
simvastatin		chemical drug		-1.553	4.15e-11	ANXA1,BIRC5,CCL2,CD14,CDKN1A,COTL1,CYBB,H1-2,HMOX1,IGFBP3,IL6,ITGB2,LCN2,LPL,MKI67,MMP3,OLR1,S100A6,SERPINE1,SOCS3,SPP1,TIMP1,TLR2
INHA	-0.217	growth factor		-1.534	0.00205	AREG,CCN4,CNN1,EREG,FGFR4,FST,HAS2,SERPINE1
eicosapentenoic acid		chemical drug		-1.509	7.87e-06	CCL2,CCR5,CD80,HMOX1,IL6,ITGAX,MMP13,MMP8,PLIN2,SERPINE1,TNFRSF1B
pioglitazone		chemical drug		-1.486	2.94e-07	Ccl2,CD80,CDKN1A,CFD,CXCL10,FN1,HAS2,HMOX1,IL1RN,IL6,IRS1,ITGAM,LPL,PLIN2,SERPINE1,TNFRSF1B
TBX5	-0.557	transcription regulator		-1.483	4.84e-09	ACTC1,BIRC5,CCL2,CCL3L3,Ccl6,Ccl9,ECM2,IFI16,IL6,MYH6,MYL7,Pln,TNNT2
TNFAIP3	0.461	enzyme		-1.474	0.0022	BIRC5,Ccl2,CXCL10,IL6,SOCS3
Bvht	-0.117	other		-1.463	0.000259	ACTC1,KDR,MMP19,MYH6,MYL7,PF4,Pln,TNNT2
CDH1	-0.22	other		-1.457	0.000194	BIRC5,FN1,GRIA1,IGFBP3,LCN2,MMP14,MMP19,MMP3
dehydroisoandrosterone		chemical - endogenous mammalian		-1.454	0.00569	Ccl2,CCR2,CYP1A1,LGALS3,MYH6,Saa3
DYRK1A	-0.101	kinase		-1.446	0.00011	CDK1,CDKN1A,IRS1,SERPINE1,UBE2C
H-7		chemical - kinase inhibitor		-1.432	0.000191	AREG,CYP1A1,FN1,ISG15,MMP3,SERPINE1
DACH1	-0.758	transcription regulator		-1.432	0.000807	CDKN1A,IGFBP3,IL6,MMP3,SERPINE1
BAPTA-AM		chemical reagent		-1.427	5.48e-06	CCL2,CDKN1A,CXCL10,CYP1A1,FN1,IL6,MMP13,SOCS3
PSEN1	0.345	peptidase		-1.424	0.000771	ARL11,ATP1A2,C1QA,C1QB,C1QC,C3AR1,CCL3L3,CCR5,CTSD,CTSS,CTSZ,GNAO1,H2AC7,IL6,IRF7,MSR1,PRC1,TNXB,TUBB6
HDAC2	0.227	transcription regulator		-1.412	0.0303	CDKN1A,CYBB,IL6,Mt2,MYO1F,PLAU,S100A9
ITGB2	1.248	transmembrane receptor		-1.406	0.000256	BCL2A1,Ccl2,CXCL10,FN1,IL6,TNIP3
STK11	-0.092	kinase		-1.402	1.19e-06	CCL2,Ccl2,CCNA2,CDKN1A,CTPS1,CTSD,CYP4F8,ECM2,EREG,FGG,FN1,IL6,KLF12,NR1D1,NRCAM,PTPRN,RGS1,RRM1,SERPINE1,SPP1,TOP2A
glutamine		chemical - endogenous mammalian		-1.4	0.0054	ACTC1,CDKN1A,FABP5,FN1,HSPA1A/HSPA1B,IL6,MYH6
MEF2C	-0.101	transcription regulator		-1.396	5.2e-11	ACTC1,CCL2,Ccl2,CCL3L3,Ccl6,Ccl9,CCR2,CCR5,CDKN1A,ECM2,IL6,MMP12,MMP13,MMP8,MYH6,MYL7,MYOZ2,Pln,TNNT2
AMPK		complex		-1.395	8.74e-05	BIRC5,CCL2,Ccl2,CDKN1A,CXCL10,CYBB,HMOX1,IL1RN,IL6,SERPINE1
iron		chemical - endogenous mammalian		-1.394	9.41e-05	BMP6,CDKN1A,GADD45G,Hamp/Hamp2,HMOX1,IL6,LCN2
beta-carotene		chemical - endogenous mammalian		-1.387	0.00272	HSPA1A/HSPA1B,IL6,LPL,NR1D1,Orm1 (includes others)
propofol		chemical drug		-1.383	5.34e-07	ANXA1,CCL2,CD14,CYBB,HMOX1,IL6,PF4,THBS1
CFTR	-0.511	ion channel		-1.363	0.000481	LRG1,MYL7,S100A8,Saa3,SLC7A8,SLFN12L,Slfn2,SOCS3
SATB1	0.114	transcription regulator		-1.363	0.000803	BCL2A1,CDKN1A,CTSD,CYBB,EPSTI1,FCGR1A,GLRX,IL7R,IRF7,NR4A2,RGS1
PPARGC1A	-0.57	transcription regulator		-1.361	2.36e-09	APOC2,Ccl7,CCN4,CD68,CDKN1A,CXCL10,CYP1A1,FIBIN,HMGCS2,HMOX1,IGFBP3,IL1RN,IL6,IRS1,LIPA,LPL,MMP19,MYH6,OLR1,PLA2G7,PLIN2,Saa3,SEMA6A,SERPINA3,SOCS3,TIMP1,TNFRSF12A,VCAN
caffeic acid phenethyl ester		chemical drug		-1.349	1.45e-07	BIRC5,CCNG1,CDKN1A,CTSB,CXCL10,HMOX1,IL6,mir-8,MKI67,MMP14,OLR1,S100A6,TLR2
K-252		chemical drug		-1.342	0.00011	CD14,H2AX,HPSE,ITGAM,SPP1
GAPDH	0.468	enzyme		-1.342	0.000367	CCL2,FCER1G,OAS1,OAS2,SPP1
ZNF217	0.031	transcription regulator		-1.342	0.00532	ADM,CCL2,COL8A1,IFI16,IGFBP3,ZNF616
NANOG	-0.118	transcription regulator		-1.342	0.0142	BIRC5,HSPA1A/HSPA1B,KDR,LAMA1,LGALS1,S100A6,TBX3
UCP1	0.054	transporter		-1.334	0.0119	ADGRE1,CD68,CTSV,CXCL10,IL6,REEP6,SERPINE1,SLN,TLR7
GSK2816126		chemical drug		-1.322	0.0213	Ccl2,CXCL10,IL6,SPP1
IDO1	0.128	enzyme		-1.3	5.13e-05	CD80,FCGR1A,IL6,ITGAX,SLC7A11
TAB1	0.138	enzyme		-1.294	1.32e-07	CDKN1A,CFB,CH25H,CXCL10,IL6,IRF7,MMP13,SERPINE1
NR3C1	-0.145	ligand-dependent nuclear receptor		-1.292	2.09e-05	ADM,ALOX5AP,ANXA1,CCL2,Ccl2,CCL3L3,CDKN1A,CKAP2,CXCL10,FCER1G,FN1,GPR65,GRIA1,HMGCS2,IL6,IL7R,ISG15,ITGB2,LGALS12,MMP13,MMP8,MSRB1,Mx1,NAIP,OLR1,PLIN2,SERPINE1,SPP1,THBS1,TIMP1,TLR2,TNFRSF12A,TNFRSF1B
FOXA1	-0.86	transcription regulator		-1.28	0.000803	ACTC1,ANXA1,CDKN1A,CNN1,CXCL10,HHIP,IL6,MUC5B,NR4A2,THBS3,TNFRSF12A
quercetin		chemical drug		-1.276	1.02e-10	BIRC5,CCL2,Ccl2,CD63,CXCL10,CYP1A1,CYP2E1,HMGCS2,HMOX1,HPSE,IL6,LCN2,LPL,MKI67,MMP12,MMP13,PLAU,TLR7
PAX3-FOXO1		fusion gene/product		-1.27	1.41e-06	ANLN,CCNG1,CD63,CDK1,CDKN1A,FGFR4,GREM1,HMOX1,HSPA1A/HSPA1B,IRS1,KDR,mir-181,NRCAM,PRC1,SPP1,TNNT2,TOP2A,TPX2
ACOX1	0.148	enzyme		-1.268	0.000106	CD63,CDKN1A,CSTB,CTSV,CYP7B1,H2AX,LCN2,LGALS3,LPL,Orm1 (includes others),PLIN2,Saa3
NME1	0.484	kinase		-1.264	0.00301	CDKN1A,CTSD,MMP14,SERPINE1,TIMP1
IDR-1002		chemical reagent		-1.249	6.59e-09	C3AR1,CCL2,Ccl2,CCL3L3,Ccl6,Ccl7,IL6,PTAFR,SLC11A1
imatinib		chemical drug		-1.24	0.00103	ATP1A2,BIRC5,Ccl9,CCNA2,CDKN1A,CXCL10,CYBB,ECT2,FN1,HMOX1,IL6,ITGAM,ITGAX,KDR,KIF11,PLIN2
BCL3	0.536	transcription regulator		-1.236	0.0296	CD80,CXCL10,IL6,S100A8
EIF4EBP2	-0.48	translation regulator		-1.225	0.000931	ARG1,GRIA1,IL1RN,IRF7
etanercept		biologic drug		-1.219	2.89e-06	CCL2,CCL27,CXCL10,CXCL13,CYBB,IL6,MMP12
sunitinib		chemical drug		-1.211	5.16e-07	BIRC5,CDKN1A,COL8A1,CXCL10,CYP1A1,FN1,ITGB2,KDR,TGFBI,TNC
Pde4		group		-1.206	6.71e-05	CCL2,CD14,CDKN1A,FN1,IL6
valproic acid		chemical drug		-1.206	0.00309	ACSS1,BIRC5,CCL2,CCR1,CD80,CDKN1A,CH25H,CTPS1,CTSB,CYP1A1,HMGCS2,HMOX1,IL6,LIPF,MMP13,SERPINE1,SLC7A8,SPP1,THBS1,TOP2A
GATA1	0.288	transcription regulator		-1.198	7.19e-05	ALOX5AP,BIRC5,BMP6,CCR1,CCR5,Clca3a1/Clca3a2,CYBB,HPSE,IL7R,ITGAX,KDR,MAMDC2,NR4A2,PF4,PLEK,PRDM8,RRM1,TOP2A
ZC3H12A	0.206	enzyme		-1.197	0.000209	CCL2,Ccl2,IL6,LPL,TNFRSF1B
zVAD-FMK		chemical - protease inhibitor		-1.195	4.54e-05	ARG1,BCL2A1,BIRC5,CCL2,CD80,CDKN1A,IL6
GW3965		chemical reagent		-1.19	1.15e-11	Ccl2,Ccl7,CCNA2,CD80,CH25H,CLEC4E,CXCL10,DHRS9,FABP5,GADD45G,GATM,IL1RN,IL6,LPL,NR1D1,PLIN2,RGS1,SOCS3,TOP2A
baicalein		chemical drug		-1.178	1.63e-05	BIRC5,CCL2,CYBB,CYP1A1,HMOX1,IL6,KDR
ST8SIA1	0.413	enzyme		-1.172	6.71e-05	C1QA,C1QB,C1QC,C3AR1,CDKN1A
PP1		chemical - kinase inhibitor		-1.172	0.00138	CXCL16,GRIA1,HMOX1,IL1RN,SERPINE1
HMOX1	1.651	enzyme		-1.167	4.17e-10	CCL2,Ccl2,CD14,CDKN1A,CXCL10,CYP1A1,CYP2E1,H2AX,HMOX1,IL1RN,IL6,ITGAM,KDR,MSR1,MYH6,NR4A2,THBS1
dimethyl sulfoxide		chemical drug		-1.166	7.61e-08	Abcb1b,ANXA1,BIRC5,CA3,CYP1A1,CYP2E1,HMOX1,IFI16,ITGAM,ITGB2,LCN2,LPL,MMP13,MYH6,PDZD2
nifedipine		chemical drug		-1.165	0.0209	BIRC5,CCL2,FN1,IL6,IRS1
NR1H2	-0.235	ligand-dependent nuclear receptor		-1.164	6.17e-05	Ccl2,Ccl7,CH25H,CXCL10,CXCL16,IL1RN,IL6,ITGAX,LPL,Saa3
ARRB2	0.891	other		-1.16	0.00497	Ccl2,CCR2,IL6,SERPINE1
NOS3	0.052	enzyme		-1.156	3.22e-07	ADGRE1,CCL2,Ccl2,CD80,FN1,IL6,MMP13,MMP14,PDE5A
MAS1	-0.278	G-protein coupled receptor		-1.154	7.45e-05	Ccl2,CLEC10A,CYBB,IL6
mir-29	-0.876	microRNA		-1.154	0.0363	COL5A2,FN1,LPL,OLR1,THBS1
glucocorticoid		chemical drug		-1.147	3.1e-08	ANXA1,BMP6,CCL2,CDKN1A,CXCL13,FN1,HAS2,HMOX1,IGFBP3,IL1RN,IL6,LPL,MMP13,MMP3,NR4A2,OAS1,Orm1 (includes others),SERPINA3,SERPINE1,SOCS3,SPP1,TLR2
LGALS3BP	0.947	transmembrane receptor		-1.139	3.03e-07	FN1,IL6,MMP13,MMP14,MMP3
PRKAA		group		-1.133	0.0022	BIRC5,Ccl2,CDKN1A,CXCL10,IL6
niacinamide		chemical - endogenous mammalian		-1.132	0.00139	BCL2A1,CCL2,CD14,CDKN1A,CDKN3,IL6,ITGAM
BCL2L11	-0.045	other		-1.131	0.00113	Ccl2,CCL3L3,CD84,IL6
rosuvastatin		chemical drug		-1.131	0.00298	CYBA,CYBB,HMOX1,IL6
levothyroxine		chemical - endogenous mammalian		-1.131	0.0296	Abcb1b,CDKN1A,IGFBP3,MYH6
GATA4	-0.156	transcription regulator		-1.127	1.65e-06	ACTC1,CCL2,CCL3L3,Ccl6,Ccl9,ECM2,IFI16,IL6,MYH6,MYL7,NUSAP1,Pln,SPP1,SPRR1A,TGFBI,TIMP1,TNNT2
apigenin		chemical - endogenous non-mammalian		-1.121	3.82e-07	CCL2,Ccl2,CCL3L3,CDK1,CDKN1A,CYP1A1,HMOX1,IL6,MMP8,MYH6,SLN
cerivastatin		chemical drug		-1.115	4.17e-06	CCL2,CDKN1A,FN1,HMOX1,IL6,ITGB2,PLAU,S100A8,S100A9,SERPINE1
choline		chemical - endogenous mammalian		-1.109	0.000599	CDKN1A,COL8A1,CYP2E1,HMOX1,SPP1
COL18A1	0.299	other		-1.105	1.92e-05	CCL2,EDNRB,F7,FN1,IL6,ITGB2,KDR,PLAU,SERPINE1,THBS1
PDPK1	-0.132	kinase		-1.093	0.00497	CDKN1A,CXCL10,IL6,SERPINE1
FOXA2	-0.314	transcription regulator		-1.091	0.000568	ACTC1,CA3,CCR5,CLDN4,CNN1,FABP5,HHIP,HMGCS2,IL6,LPL,MUC5B,NR4A2,Saa3,THBS3
fluvastatin		chemical drug		-1.091	0.000697	CDKN1A,CYBA,HMOX1,IL6,SERPINE1
resolvin D2		chemical - endogenous mammalian		-1.091	0.000931	Ccl2,HMOX1,IL6,ITGB2
COPS5	0.66	transcription regulator		-1.091	0.000931	CDKN1A,FCER1G,H2AX,IL6
cytochalasin D		chemical toxicant		-1.091	0.0146	ANLN,CCL2,IL6,MMP14
NR5A2	0.344	ligand-dependent nuclear receptor		-1.087	1.19e-08	C1QB,C3AR1,Ccl7,CDKN1A,CFD,CXCL10,CXCL16,CYP7B1,GADD45G,GATM,IL1RN,IL6,mir-8,RGS4,TNFRSF1B
RASSF1	0.005	other		-1.085	0.0118	AREG,CCNA2,CDKN1A,GSN,IGFBP3,SPP1
LDLR	0.312	transporter		-1.083	1.16e-30	ANLN,APOBEC1,BIRC5,C1QA,CCL2,Ccl2,CCL3L3,Ccl7,CCNA2,CCNB2,CCR1,CCR2,CCR5,CD68,CDK1,CDKN1A,CFB,CLEC4E,CYP7B1,DHRS9,FABP5,FCGR1A,GADD45G,GATM,IL1RN,IL6,IRF7,KNL1,LAIR1,LCN2,LPL,LY86,MKI67,MMP14,MSR1,NUSAP1,PLAU,PRC1,RGS1,SPP1,TOP2A,UBE2C,VCAN,ZBP1
hemin		chemical - endogenous mammalian		-1.083	3.65e-06	Ccl2,CCL3L3,CD68,CDKN1A,CYBB,FN1,GUCY1A1,HMOX1,IL6,SPP1
fenofibrate		chemical drug		-1.082	0.00328	Abcb1b,APOC2,CCL2,Ccl2,CD68,FGG,HMOX1,IL6,KDR,LPL,PTAFR,SERPINE1,TIMP1
IKZF1	0.517	transcription regulator		-1.077	0.000124	CCL3L3,CCR1,CD68,CDKN1A,CYP7B1,EPSTI1,FGFR4,FN1,IFI16,IL6,IL7R,LGMN,LILRB3,MMP14,TNNT2,TYROBP
PLCG1	-0.464	enzyme		-1.067	7.45e-05	CCL2,KDR,SERPINE1,THBS1
isopentenyl diphosphate		chemical - endogenous mammalian		-1.067	0.000156	CCR1,CCR2,CCR5,FCGR3A/FCGR3B
CYP27B1	-0.076	enzyme		-1.067	0.000697	CCL3L3,CD14,IL6,SPP1,TLR2
CR1L	-0.032	other		-1.067	0.00298	COL8A1,PTGER4,SERPINE1,TNC
TIMP1	2.631	cytokine		-1.067	0.00389	CDKN1A,IGFBP3,MMP3,PLAU
GJA1	0.724	transporter		-1.067	0.00441	CCL2,CDKN1A,SPP1,THBS1
ALDH1A2	0.147	enzyme		-1.067	0.00559	MAFB,SPP1,TGFBI,TIMP1
pimagedine		chemical drug		-1.067	0.00939	CNN1,HMOX1,IL6,SERPINE1
clozapine		chemical drug		-1.067	0.0354	Abcb1b,GRIA1,IL6,NR4A2
rosiglitazone		chemical drug		-1.059	3.92e-21	ADGRE1,ARG1,C1QA,C1QB,C1QC,CCL2,Ccl2,CCL3L3,Ccl7,CCN4,CCR2,CD68,CD80,CDKN1A,CFD,CLEC7A,CXCL10,CYP1A1,FABP5,FN1,GPR65,GRIA1,HAS2,HMGCS2,HMOX1,HPGDS,IL1RN,IL6,IL7R,IRF7,IRS1,ITGAM,LCN2,LPL,LRG1,MSR1,NR1D1,OAS1,OAS2,OLR1,PLIN2,S100A8,S100A9,Saa3,SERPINE1,SOCS3,THBS1,TIMP1,TNC
parthenolide		chemical drug		-1.044	0.00559	CCL2,Ccl2,HMOX1,IL6
ANXA1	1.227	enzyme		-1.043	0.00014	ANXA1,CCL2,IL6,ITGAM,ITGB2,PLAU
ciglitazone		chemical drug		-1	5.15e-07	CCL2,Ccl2,CDKN1A,CYBB,FN1,GSN,IL6,LCN2,OLR1,SERPINE1,TGM1
DPP4	-0.5	peptidase		-1	2e-05	IL1RN,MMP14,PLAU,THBS1,TIMP1,TOP2A
8-(4-chlorophenylthio)-guanosine-3', 5'-cyclic monophosphate		chemical reagent		-1	2.83e-05	Ccl2,CCL3L3,Ccl7,CDKN1A,IL6
dipyridamole		chemical drug		-1	5.13e-05	CCL2,HMOX1,IL6,SPP1,TIMP1
morin		chemical - endogenous non-mammalian		-1	0.000156	BIRC5,MMP13,MMP3,TIMP1
W7		chemical reagent		-1	0.000758	CCL2,CD14,CD80,IL6
fucoidin		chemical reagent		-1	0.000931	CDKN1A,IL6,IRF7,ISG15
zerumbone		chemical - endogenous non-mammalian		-1	0.00136	BCL2A1,BIRC5,HMOX1,IL6
alpha-tocopherol		chemical drug		-1	0.00136	HMOX1,HSPA1A/HSPA1B,IL6,MMP19
NODAL	-0.349	growth factor		-1	0.00161	ARG1,CD80,CXCL10,ITGAX
LATS2	-0.51	kinase		-1	0.00559	CD14,CDKN1A,CLDN4,LTF
PAK2	0.219	kinase		-1	0.0103	H2AX,IFI16,IGFBP3,S100A6
ATP7B	-0.508	transporter		-1	0.0113	CCNG1,FABP5,H1-2,Mt2
infliximab		biologic drug		-1	0.0396	Ccl2,FCGR2A,FCGR2B,MMP12
TSC22D3	-0.45	transcription regulator		-0.987	5.29e-05	ANXA1,CCL2,CD80,CDKN1A,IL6,LILRB4,TLR2
DUSP1	-0.535	phosphatase		-0.978	2.02e-08	CCL2,Ccl2,CCL3L3,CFB,CLEC10A,CXCL10,CYBB,IL1RN,IL6,LTF,OLR1,PLIN2,S100A9,SERPINE1,TLR2
BMPR2	-0.619	kinase		-0.975	0.00161	Ccl9,FN1,Hamp/Hamp2,SPP1
PNPT1	0.186	enzyme		-0.973	1.26e-05	CDKN1A,CXCL10,IFI16,IL6,IRF7,ISG15,MMP3,OAS1
telmisartan		chemical drug		-0.972	0.0012	CCL2,CLEC10A,IL6,ITGAX,LPL,NR4A2
cilostazol		chemical drug		-0.97	5.83e-05	CCL2,HMOX1,KDR,NR4A2,PDGFC,SERPINE1
4-phenylbutyric acid		chemical - endogenous mammalian		-0.963	0.0027	CCL2,Ccl2,CDKN1A,GSN,GUSB,IL6,OLR1
bardoxolone methyl		chemical drug		-0.954	0.000255	BIRC5,Ccl2,CCL3L3,HMOX1,IL6
doxycycline		chemical drug		-0.946	0.000115	HSPA1A/HSPA1B,ITGAX,MMP12,MMP8,MUC5B,Pln,TIMP1,TLR2
mir-133	0.968	microRNA		-0.946	0.00249	CNN1,FN1,KLF15,MMP14,TNNT2,VCAN
everolimus		chemical drug		-0.943	0.00853	CCNB2,CDK1,CDKN1A,KDR
SPDEF	-0.044	transcription regulator		-0.937	0.0147	CDKN1A,COL5A2,PLAU,SERPINE1,TNC
STAT5B	-0.249	transcription regulator		-0.923	0.0118	ACTC1,Aox3,CCL3L3,CDKN1A,Hamp/Hamp2,HEXA,IL6,MYH6,MYL7,NR4A2,SLN,SOCS3,TLR2
lipoxin A4		chemical - endogenous mammalian		-0.922	4.21e-10	CCL2,Ccl2,CCR5,CDKN1A,CYP1A1,FN1,HMOX1,IL6,SERPINE1,TIMP1
THRA	-0.766	ligand-dependent nuclear receptor		-0.922	1.9e-05	CCL2,Ccl2,CDKN1A,CXCL10,FST,HMOX1,IL6,LPL,MYH6,Pln,PTAFR,SERPINE1
andrographolide		chemical drug		-0.908	0.000512	CYP1A1,FN1,HMOX1,IL6,TIMP1
ING4	-0.157	transcription regulator		-0.9	2.95e-05	Ccl2,CDKN1A,CXCL10,IL6
GDF11	0.274	growth factor		-0.9	0.00559	Acp5,CTSK,FST,SPP1
ABCA1	0.575	transporter		-0.9	0.0146	ANXA1,Ccl2,CCL3L3,IL6
NBEAL2	-0.169	other		-0.896	1.28e-06	CCL3L3,Ccl7,CXCL10,CXCL16,PF4,THBS1
suramin		chemical drug		-0.896	9.31e-06	CCL2,Ccl2,CD80,FST,HMOX1,IL6
resolvin E1		chemical - endogenous mammalian		-0.896	1.22e-05	Ccl2,CCL3L3,CCR5,HMOX1,IL6,IRS1
LYN	0.157	kinase		-0.895	3.47e-08	BCL2A1,BIRC5,Ccl2,CCL3L3,Ccl7,Ccl9,CCNA2,CD80,CDKN1A,FCGR2B,IL6,SOCS3
MRTFA	-0.066	transcription regulator		-0.89	1.73e-06	ACTC1,ANLN,CD177,CNN1,CYBA,DIAPH3,FIBIN,LCN2,LILRB4,LTF,S100A8,S100A9,Saa3,SERPINE1,THBS1,TNC
YY1	0.155	transcription regulator		-0.883	2.98e-07	ACTC1,BIRC5,BMP6,CCNA2,CCNB2,CCR5,CDKN1A,CYBB,GADD45G,H2AX,HAS2,HMOX1,KDR,KIF11,LAMA1,MKI67,MMP13,MYH6,PRC1,RRM1,TGFBI,TOP2A
FOXP3	0.417	transcription regulator		-0.882	3.27e-05	ANLN,ANXA1,CCL3L3,CCR1,CCR2,CD200R1,CD80,CDKN1A,CXCL13,IL6,IL7R,LGALS1,LGALS3,RGS1
kawain		chemical - endogenous non-mammalian		-0.882	0.000758	Ccl2,HMOX1,IL6,TLR2
miR-125b-5p (and other miRNAs w/seed CCCUGAG)		mature microRNA		-0.882	0.000904	ACSS1,ARG1,CCNA2,CCR5,CYP1A1,IGFBP3,IL1RN,LIPA
ADM	1.06	other		-0.882	0.00138	ADM,Ccl2,FN1,IL6,SPP1
cycloheximide		chemical reagent		-0.872	7.05e-13	Abcb1b,ACTC1,ADM,AREG,BEX3,CCL2,CCR1,CDKN1A,CXCL10,CYP1A1,FN1,FST,GADD45G,HEXA,HMOX1,IL1RN,IL6,IL7R,IRF7,ITGAM,LCN2,LPL,MMP12,MMP13,MMP19,OLR1,PLAU,RSAD2,S100A8,SERPINE1,SOCS3,SPP1,THBS1,TIMP1
26s Proteasome		complex		-0.869	2.02e-08	ARG1,ATP6V0D2,CCL2,CCNA2,CD68,CDK1,CDKN1A,CTSB,CTSD,EREG,GRIA1,H2AX,IL6,MMP12,PSAP,SOCS3,TOP2A
Immunoglobulin		complex		-0.868	5.9e-27	ADM,AREG,BCL2A1,BIRC5,C3AR1,CCL2,Ccl2,CCL3L3,Ccl9,CCR2,CD14,Cd52,CD63,CD68,CD72,CD80,CFD,CSF2RB,CTSZ,CXCL10,CXCL13,CXCL16,CYP2E1,CYP4F8,EDNRB,FCER1G,FCGR1A,FCGR2A,FCGR3A/FCGR3B,FN1,H2AX,Hamp/Hamp2,HMOX1,IFI30,IL1RN,IL6,IL7R,IRF7,ITGAM,ITGAX,KDR,LCN2,LGALS3,LILRB3,LILRB4,MKI67,MMP13,Mx1,NAIP,OAS1,OAS2,PLAU,PLEK,RSAD2,S100A8,S100A9,SERPINA3,SLC11A1,SOCS3,SPP1,TIMP1,TLR2,TLR7,TLR8,TNFRSF1B,VCAN
lovastatin		chemical drug		-0.868	0.00191	BIRC5,CCL2,CCNA2,CDKN1A,COTL1,HMOX1,IL6,MKI67,SERPINE1
NRAS	0.032	enzyme		-0.862	1.32e-08	CCNB2,CCNG1,CD68,CDKN1A,CDKN3,CYBB,FN1,IFI16,IL1RN,IL6,ISG15,KDR,LCN2,LGALS1,LY86,MKI67,MMP13,MSR1,PLAU,UBE2C
2-(4-amino-1-isopropyl-1H-pyrazolo[3,4-d]pyrimidin-3-yl)-1H-indol-5-ol		chemical reagent		-0.862	0.0194	BIRC5,H1-2,H2AX,HAS2,IL1RN,KNL1,NR4A2,RRM1,TOP2A
HNF1B	-0.276	transcription regulator		-0.861	0.00349	CDK1,COL5A2,FN1,IGFBP3,MAFB,mir-8,PLAU,S100A6
LECT2	-0.122	other		-0.849	7.45e-05	Ccl2,CCL3L3,CXCL10,IL6
ESR2	-0.226	ligand-dependent nuclear receptor		-0.835	4.89e-09	Abcb1b,ACTC1,BIRC5,CCL2,CCL3L3,CCNA2,CCR5,CDKN1A,CLDN4,CNN1,CTSD,CXCL16,CXCL17,CYTH4,EREG,FN1,FST,GLRX,IGFBP3,IL6,KDR,LPL,MKI67,MMP13,MMP14,MMP3,MYH6,PLAU,PLIN2,S100A9,SERPINE1,SOCS3,SPP1,TIMP1
SERPINF1	-0.082	other		-0.818	0.0334	BCL2A1,CYBA,CYBB,THBS1
NOTCH1	-0.35	transcription regulator		-0.808	3.6e-08	Ccl9,CD14,CD68,CD84,CDKN1A,CFD,CNN1,CSF2RB,ECT2,FCER1G,FCGR2A,FCGR2B,HMOX1,IFI16,IGFBP3,IL6,IL7R,ITGAM,MMP3,RGS5,SERPINE1,SPP1
VCAN	1.055	other		-0.807	2.25e-08	ADM,CCL2,Ccl2,CDKN1A,CYBA,FABP5,FN1,FST,HAS2,IL1RN,IL6,LCN2,LGALS3,OAS2,PLAU,TIMP1,VCAN
STAT6	-0.106	transcription regulator		-0.799	5.14e-17	Acp5,ANXA1,AREG,ARG1,CCL2,Ccl2,CCL3L3,Ccl6,CCR5,CD72,CD80,CDKN1A,Clca3a1/Clca3a2,CTSB,CTSS,CXCL10,CYBB,FCER1G,FCGR1A,FCGR2A,FCGR3A/FCGR3B,GADD45G,GATM,GTSE1,HMGCS2,IFI16,IL1RN,IL6,IRF7,ISG15,LACC1,LILRB4,MMP12,MMP13,MMP14,MPEG1,Mx1,PDGFC,SERPINE1,TFEC,TIMP1,ZBP1
Hdac		group		-0.797	0.00804	AREG,BIRC5,CDKN1A,EDNRB,IGFBP3,IL6,MMP14,SPP1,TBX3
ATG7	0.236	enzyme		-0.796	0.00569	Ccl2,CTSB,IL6,MARCO,MSR1,SOCS3
chloroquine		chemical drug		-0.788	0.0012	CTSD,CXCL10,FN1,IL6,MMP13,SOCS3
SCARB1	0.369	transporter		-0.781	0.00272	CCL2,CD68,IL1RN,IL6,SPP1
WNT5A	-0.077	cytokine		-0.777	2.66e-06	AREG,BMP6,CCL2,CCL3L3,CD14,CD80,EREG,FN1,GREM1,IL6,MMP13,SOCS3,SPP1
HDAC4	-0.046	transcription regulator		-0.776	0.000834	C1QC,CDKN1A,FST,IL6,MMP13,NR4A2,NRCAM,Pln,RGS4,TNFRSF12A
LDB1	-0.378	transcription regulator		-0.775	0.00225	ANXA1,APOBEC1,CCR2,CD53,CDKN1A,CLDN4,CLEC4E,CSTB,GSN,GTSE1,LGALS1,PDZD2,SLC7A8,TLR2,TNFRSF1B
LMO2	-0.065	transcription regulator		-0.775	0.00225	ANXA1,APOBEC1,CCR2,CD53,CDKN1A,CLDN4,CLEC4E,CSTB,GSN,GTSE1,LGALS1,PDZD2,SLC7A8,TLR2,TNFRSF1B
SULT1E1	0.063	enzyme		-0.762	0.000931	Ccl2,CD68,IL6,LCN2
Mt2	1.491	other		-0.762	0.000931	Hamp/Hamp2,IL6,LPL,SERPINE1
PTPN22	0.662	phosphatase		-0.762	0.000931	ARG1,IL6,ISG15,Mx1
TRAF3	0.196	enzyme		-0.738	3.02e-05	ADM,CCR1,CD80,CXCL10,CXCL13,IL6,ISG15,LILRB4,MPEG1
RXRA	-0.033	ligand-dependent nuclear receptor		-0.735	1.65e-11	C1QA,Ccl6,Ccl9,CCNA2,CD109,CD200R1L,CDKN1A,CTSB,CTSS,CXCL10,FABP5,FGG,HAS2,HMGCS2,HMOX1,IL6,LCN2,LPL,LTF,MARCO,MMP12,MYL7,NR1D1,OLR1,Orm1 (includes others),S100A8,SPP1,VCAN
oleic acid		chemical - endogenous mammalian		-0.714	8.67e-07	ARG1,Ccl2,CD68,HMOX1,IGFBP3,IL6,LCN2,LPL,Mt2,OLR1,PLIN2,SERPINE1,TLR2
plicamycin		chemical drug		-0.691	0.000132	ADAMTS4,CCL2,CDKN1A,CYP2E1,HMOX1,KDR,MUC5B,SERPINE1,SOCS3,TIMP1
AICAR		chemical - endogenous mammalian		-0.69	0.000641	ARG1,CDKN1A,FN1,ITGAM,MKI67,SERPINE1,SOCS3
ING1	-0.059	transcription regulator		-0.689	0.00106	CCL2,CDKN1A,HSPA1A/HSPA1B,SPP1,Tnfrsf22/Tnfrsf23
PPARA	-0.174	ligand-dependent nuclear receptor		-0.685	2.41e-10	APOC2,ARG1,C1QA,C1QB,Ccl2,CCNA2,CD63,CDK1,CDKN1A,CYBA,CYBB,CYP1A1,CYP7B1,FABP5,FGG,H1-2,H2AX,HMGCS2,HMOX1,IGFBP3,IL1RN,IL6,LPL,mir-8,MKI67,NR1D1,Orm1 (includes others),PLA2G7,PLIN2,PRC1,S100A8,S100A9,TLR2,TOP2A
ENG	-0.591	transmembrane receptor		-0.68	1.35e-05	FN1,H2AX,KDR,MMP19,PLAU,SERPINE1,THBS1
FGF1	-0.784	growth factor		-0.661	1.58e-10	ADGRE1,AKR1B10,Ccl2,CCN4,CD68,CDKN1A,GADD45G,HAS2,HMOX1,IL6,IRS1,ITGAM,ITGAX,MKI67,NR4A2,SPP1,THBS1,TNFRSF12A
MEOX2	-0.193	transcription regulator		-0.655	0.00695	CCL2,CDKN1A,IL6,MMP14
BMP7	0.001	growth factor		-0.643	5.91e-10	BIRC5,CCL2,CCR2,CDKN1A,COL5A2,EREG,FN1,GREM1,IGFBP3,IL1RN,IL6,IRS1,LTF,MMP13,MMP3,SERPINE1,SOCS3,SPP1,TIMP1,VCAN
KLF11	-0.167	transcription regulator		-0.632	4.65e-06	CCL2,CCL3L3,CCR2,GREM1,MMP12,MMP13,MMP14,MMP3,MMP8,PLAU,SERPINE1,THBS1,TIMP1
mibolerone		chemical drug		-0.632	0.000178	BMP6,CDK1,GADD45G,GPNMB,HEXB,IGFBP3,IRF7,LPL,LRG1,TGFBI,TOP2A
CDK5	0.303	kinase		-0.625	0.000367	CD14,CDKN1A,IGFBP3,LPL,LRG1
SMAD7	-0.321	transcription regulator		-0.62	4.07e-07	AREG,CCL2,Ccl2,CCNA2,CDK1,CDKN1A,CXCL10,FN1,FST,Hamp/Hamp2,HMOX1,MMP12,SERPINE1,TGFBI,TIMP1
SLC2A1	0.559	transporter		-0.6	6.35e-06	DHRS9,FN1,HMOX1,SERPINE1,SLC7A11
aspirin		chemical drug		-0.596	1.27e-08	Abcb1b,ADM,BIRC5,BMP6,CCL2,Ccl2,CD80,CDKN1A,CTSD,CXCL10,EDNRB,IGFBP3,IL6,KDR,MMP13,OLR1,TFF2,THBS1
hydrocortisone		chemical - endogenous mammalian		-0.595	3.94e-08	ADM,BIRC5,CCL2,CD80,CDK1,CFD,FN1,IGFBP3,IL6,ITGAM,LPL,NUSAP1,S100A8,SEMA6A,SERPINE1,TLR2
DMP1	-0.079	other		-0.585	0.00197	C1QB,F13A1,Fcrls,IL6,SPP1
bortezomib		chemical drug		-0.581	2.93e-06	BCL2A1,BIRC5,Ccl2,Ccl9,CDKN1A,CSF2RB,CXCL10,CXCL13,GPNMB,HSPA1A/HSPA1B,IGFBP3,IL6,IRS1,RSAD2,SERPINA3,SH3BP2,TLR7,TLR8
bisphenol A		chemical - endogenous mammalian		-0.579	0.0068	CCL2,CDKN1A,CFD,CXCL10,EREG,HSPA1A/HSPA1B,KDR,LCN2,NR4A2
MRTFB	-0.089	transcription regulator		-0.577	9.91e-07	ADM,ANLN,CD177,CNN1,COL5A2,CYBA,DIAPH3,FIBIN,LCN2,LILRB4,LTF,S100A8,S100A9,Saa3,SERPINE1,THBS1
bee venom		chemical - endogenous non-mammalian		-0.57	2.77e-08	AREG,Ccl2,Ccl7,CYBB,MKI67,NR4A2,NUSAP1,PRC1,RGS1,Saa3,SLC7A11,Slfn2,SOCS3,TOP2A
green tea polyphenol		chemical drug		-0.555	3.16e-05	ANXA1,CDKN1A,HMOX1,IGFBP3,IL6,PLAU
ATF3	0.918	transcription regulator		-0.548	1.82e-08	CDK1,CDKN1A,CXCL16,GSN,IL6,MMP13,MMP3,Pln,RSAD2,SERPINE1,SLC11A1,SLC15A3,SPRR1A,TLR2
triptolide		chemical drug		-0.54	1.64e-07	Abcb1b,ADM,BIRC5,BMP6,CCR5,CDKN1A,EDNRB,IGFBP3,IL6,KDR,mir-181,MKI67,MMP19,SOCS3,TLR2
IRS1	-1.009	enzyme		-0.537	1.82e-07	ACTC1,BMP6,CCN4,FMO1,FST,HMOX1,IL6,IRS1,LPL,MMP14,SIGLEC1,SPP1,TGFBI,TNNT2,TNXB
ID1	-0.114	transcription regulator		-0.534	0.00317	CDKN1A,FN1,IFI16,MMP13,MMP14,THBS1
sulforafan		chemical drug		-0.531	0.00533	AKR1B10,BIRC5,CCL2,CDKN1A,HMOX1,IL6,OAS1,SOCS3
IL25	-0.04	cytokine		-0.511	0.00442	CCL2,Ccl2,IL6,KDR,PLIN2
Cyp2c23	-0.127	enzyme		-0.51	4.55e-08	Ccl2,CCNA2,CCNB2,CCR2,ITGAM,MS4A7,Stfa2/Stfa2l1
CBFB	0.486	transcription regulator		-0.509	0.00309	CCR5,LGMN,MMP13,PTGER4,RGS1,SPP1,TLR7
CYLD	0.265	transcription regulator		-0.496	0.000367	CD80,FCER1G,IL6,IL7R,SERPINE1
ROCK		group		-0.469	0.000557	CCL2,CDKN1A,CNN1,FN1,SPP1,THBS1
sulindac sulfide		chemical drug		-0.456	0.0166	CDKN1A,CYP1A1,GADD45G,MYOZ2,PLAU
docosahexaenoic acid		chemical drug		-0.455	2.94e-07	ARG1,BCL2A1,CCL2,Ccl2,CD80,CDKN1A,HMOX1,IL6,MMP13,PDE5A,PTAFR,SERPINE1,SOCS3,THBS1,TIMP1,TNFRSF1B
LPL	1.235	enzyme		-0.448	0.000557	CCL2,IL6,IRS1,LPL,MSR1,THBS1
L-tryptophan		chemical - endogenous mammalian		-0.447	2.83e-05	CD80,IL6,LILRB4,S100A6,SLC7A11
MST1	-0.017	growth factor		-0.447	0.000209	BIRC5,IL1RN,IL6,MSR1,SPP1
ASXL2	-0.062	other		-0.447	0.000435	ATP1A2,CFD,KLF15,LPL,SERPINE1
JAG2	-0.169	growth factor		-0.447	0.000929	CCR1,IL1RN,IL6,MMP12,SPP1
pexidartinib		chemical drug		-0.447	0.0129	CD300C,CYP1A1,GNAO1,IL7R,RGS1
RHO	0.046	G-protein coupled receptor		-0.447	0.0129	C1QA,CTSS,H1-2,PLA2G7,S100A6
PDLIM2	-0.27	other		-0.447	0.049	BST1,CEMIP,FHDC1,IGFBP3,KYNU
ADAM12	0.487	peptidase		-0.446	9.09e-07	Ccl2,Ccl7,Ccl9,CFD,COL5A2,GREM1,IGFBP3,MMP3,OLR1,SERPINE1,TGFBI
testosterone		chemical - endogenous mammalian		-0.443	3.03e-05	ANXA1,CA3,CDKN1A,CTSV,CYP2E1,CYP7B1,FN1,FST,GRIA1,GUSB,HMGCS2,HSPA1A/HSPA1B,IGFBP3,IL6,IRS1,LGALS1,PDE5A,PLAU,THBS1,TOP2A,VCAN
MALAT1	-0.208	other		-0.422	0.00624	CA3,Ccl2,CFD,IL6
SPARC	0.2	other		-0.416	0.000621	CFD,CLDN4,CYP1A1,FN1,IL6,RRM1,SERPINE1,SLC7A11,SPRR1A
2-deoxyglucose		chemical drug		-0.412	0.0027	Abcb1b,Ccl2,CDKN1A,IL6,MMP13,SPP1
prostaglandin D2		chemical - endogenous mammalian		-0.401	1.29e-06	CXCL10,HAS2,HMOX1,HSPA1A/HSPA1B,IL6,ITGAM,MUC5B
PPARG	0.625	ligand-dependent nuclear receptor		-0.392	1.22e-07	Abcb1b,ARG1,BIRC5,CCL2,Ccl2,CDKN1A,CFD,CTPS1,CYBA,FABP5,FAM20C,FN1,FST,HMGCS2,HMOX1,IGFBP3,IL6,IRS1,LPL,MKI67,MMP14,NR1D1,OLR1,PF4,PLIN2,S100A8,SERPINE1,SOCS3,SPP1,SPRR1A
epothilone B		chemical drug		-0.391	2.04e-05	CDK1,CDKN1A,MKI67,THBS1,TOP2A
GAB2	0.251	other		-0.378	2.89e-06	Ccl2,CCL3L3,GSN,IL6,KDR,MUC5B,SERPINE1
INSR	-0.158	kinase		-0.378	2.28e-05	AREG,BCL2A1,BIRC5,C1QA,CCL2,Ccl2,CDK1,CDKN1A,CSTB,CTSB,CTSV,EREG,IL6,IRS1,LGALS1,mir-297,MMP12,MPEG1,OLR1,PTPRN,RRM1,SERPINE1,SOCS3
F7	1.255	peptidase		-0.378	0.0113	Ccl2,IL6,MMP13,MMP14
SOD2	0.445	enzyme		-0.373	0.00112	CDKN1A,GSN,HMOX1,IL6,MMP13,MMP3,MMP8,SERPINE1
luteolin		chemical drug		-0.364	0.000179	BIRC5,CXCL10,CYP1A1,HMOX1,IL6,IRS1,MMP13
histamine		chemical - endogenous mammalian		-0.36	0.000158	AREG,BIRC5,CCL2,Ccl2,CD80,CLDN4,CXCL10,IL6
ERBB3	-0.239	kinase		-0.355	2.26e-09	CDKN1A,CTSK,FN1,HAS2,HEXB,HMOX1,ITGB2,MMP3,SERPINA3,SERPINE1,SOCS3,THBS1,TNC,TNNT2,TNXB,TOP2A
SHH	-0.375	peptidase		-0.351	0.0406	Ccl9,CTPS1,FN1,H2AX,HHIP,IL6,SERPINE1,SPP1
KLF2	-0.989	transcription regulator		-0.346	4.45e-07	ADM,CCL2,Ccl2,Ccl7,CCR2,CCR5,CDKN1A,HPSE,IL6,IL7R,ITGB2,KDR,MMP14,Serpinb9b,SERPINE1,THBS1,TIMP1
NCOA2	-0.089	transcription regulator		-0.345	1.19e-08	APOC2,Ccl2,CCL3L3,CDKN1A,CFD,CXCL10,CYP1A1,FST,IL6,ISG15,LPL,MMP13,Mx1,NR1D1,PLIN2
TSC1	-0.126	other		-0.342	8.24e-05	BEX1,CYP2E1,GLRX,HMOX1,IL6,IRS1,MKI67,PLAU
cis-urocanic acid		chemical drug		-0.339	0.000758	GLRX,HSPA1A/HSPA1B,IGFBP3,IL6
BCL2	-0.124	transporter		-0.336	0.0471	CCNG1,CDK1,CDKN1A,IL6,TIMP1
TMPRSS2-ERG		fusion gene/product		-0.333	0.000928	AREG,C15orf48,CYBA,EREG,LPL,SLC7A11,TGFBI,THBS1,TLR2
HDAC3	0.37	transcription regulator		-0.327	2.37e-05	CCNB2,CDKN1A,CXCL10,HMOX1,IL6,mir-8,MMP12,PLIN2,SERPINE1,SPP1
butyric acid		chemical - endogenous mammalian		-0.322	6.77e-13	ANXA1,BCL2A1,BIRC5,CCNA2,CCNB2,CCNG1,CCR1,CCR5,CD300C,CD80,CDK1,CDKN1A,COL5A2,CYP1A1,GSN,H1-2,IFI16,IFI30,IGFBP3,IL6,IRS1,ITGAM,MKI67,MMP12,OAS2,PLAU,PSAP,PTAFR,PTPRN,SERPINE1,SOCS3,SPP1,TGFBI,TGM1,TIMP1,TOP2A
CLCN5	0.929	ion channel		-0.312	1.43e-05	CA3,Ccl2,CTSB,IL6,MKI67
CITED2	-0.627	transcription regulator		-0.302	3.29e-05	ADM,ARG1,CCL2,CLEC10A,IL6,LPL,MMP13
resolvin D1		chemical - endogenous mammalian		-0.3	0.00298	ARG1,CCL2,HMOX1,IL6
melatonin		chemical - endogenous mammalian		-0.297	0.00376	CCL2,CDKN1A,CXCL10,HMOX1,IL6,IRS1,SPP1
PROC	-0.11	peptidase		-0.289	5.29e-05	BCL2A1,CCL2,Ccl2,IL6,SERPINE1,THBS1,TLR2
docetaxel		chemical drug		-0.288	2.76e-05	BIRC5,CDK1,CDKN1A,CXCL10,KDR,mir-181,mir-8,NDC80,PLAU,THBS1,TUBB6
ADIPOQ	-0.145	other		-0.28	1.28e-11	ARG1,BIRC5,CCL2,Ccl2,CDKN1A,CLEC10A,CXCL10,CYBA,CYBB,FN1,HMGCS2,HMOX1,IL6,IRS1,LPL,MMP13,MMP3,MSR1,SOCS3,TIMP1,TNIP3
SHC1	0.226	other		-0.277	4.5e-05	CDKN1A,CXCL13,FST,GDA,ITGAM,LILRB4,SERPINE1,TFEC
NOG	0.315	growth factor		-0.277	0.00014	FST,HAS2,KDR,MMP13,MMP3,SPP1,VCAN
SENP1	0.086	peptidase		-0.277	0.000367	ARG1,Ccl9,CTSD,CYBB,S100A8
PRKG1	-0.389	kinase		-0.277	0.000697	CDKN1A,FN1,GUCY1A1,SERPINE1,THBS1
NOTCH2	-0.241	transcription regulator		-0.277	0.0146	CNN1,IL6,IL7R,RGS5
phenyl-N-tert-butylnitrone		chemical reagent		-0.271	6.35e-06	CD80,FN1,HMOX1,HSPA1A/HSPA1B,IL6
HSPB1	-0.296	other		-0.266	7.05e-07	Ccl2,CCNA2,CCNB2,CDK1,CDKN1A,IL6,LPL
GATA6	-0.434	transcription regulator		-0.258	0.0047	ACTC1,ARG1,CDKN1A,CLEC10A,CXCL13,LAMA1,MARCO,MYH6,NUSAP1,Saa3,SPRR1A
SR 144528		chemical reagent		-0.254	4.83e-05	CCL2,CCR1,CCR2,IL1RN
2-methoxyestradiol		chemical - endogenous mammalian		-0.254	0.0123	AREG,HMOX1,IL6,LTF
INT-767		chemical drug		-0.247	0.00061	Ccl2,CLEC7A,CYP7B1,IL6
Collagen(s)		complex		-0.243	2.1e-06	C3AR1,CD63,CD68,FN1,ITGAM,MMP13,THBS1,TNC
SFTPD	0.504	other		-0.243	5.13e-05	CCL2,Ccl2,CD14,MMP12,MMP3
NUPR1	0.309	transcription regulator		-0.243	0.0396	ACSS1,ADM,AREG,CCNA2,CCNB2,CD63,CD68,EREG,GTSE1,H2AC14,H2BC14,KIF11,KNL1,MKI67,MMP12,NR1D1,SERPINE1
4-hydroxytamoxifen		chemical drug		-0.241	5.2e-06	ACTC1,AREG,CDKN1A,CLDN4,CTSD,CYP1A1,GLRX,IGFBP3,IL6,IL7R,MKI67,NR4A2,PTGER4,S100A9,TFF2
dinoprost		chemical - endogenous mammalian		-0.24	3.78e-05	ADM,HMGCS2,HSPA1A/HSPA1B,IL6,LIPA,LPL,NR4A2,SPP1,THBS1
Z-LLL-CHO		chemical - protease inhibitor		-0.226	2.37e-06	BIRC5,CCL2,Ccl2,CCNG1,CDKN1A,CFB,CLDN4,CTSB,CXCL10,CYP1A1,HAS2,HMOX1,IL6,IRF7,IRS1,MMP13,MMP14,RGS4,RRM1,THBS1,TIMP1,TLR2
RLN2		other		-0.226	7.45e-05	EDNRB,MMP13,MMP3,TIMP1
PPARD	-0.263	ligand-dependent nuclear receptor		-0.221	1.03e-06	BIRC5,C1QA,C1QB,C1QC,Ccl2,CCL3L3,CD68,CDK1,CLEC7A,FN1,HMGCS2,IL6,LPL,MPEG1,PLIN2,S100A6,TFF2,THBS1,TNFRSF12A
IRS2	-0.297	enzyme		-0.218	0.0103	FST,HMOX1,IRS1,LPL
TANK	0.589	other		-0.201	0.00298	Ccl7,IL6,MARCO,PLA1A
Notch		group		-0.2	0.00109	ADM,BIRC5,CCN4,CDKN1A,CNN1,GUCY1A1,IL6
lactacystin		chemical - protease inhibitor		-0.196	0.0079	BEX1,CCL2,Ccl2,CDKN1A,CTSD,CYP1A1,HMOX1,IL6,IRS1,TLR2
celecoxib		chemical drug		-0.183	9.66e-07	BCL2A1,BIRC5,CD68,CDKN1A,CLDN4,CTSK,HMOX1,KDR,MKI67,MMP13,SERPINE1,TLR2,TNFRSF1B
4-hydroxynonenal		chemical toxicant		-0.162	8.43e-05	CDK1,CTSB,HSPA1A/HSPA1B,IL6,mir-181,SERPINE1
iron dextran		chemical drug		-0.159	0.00011	BMP6,Ccl2,Hamp/Hamp2,IL6
FOXO4	-0.224	transcription regulator		-0.156	0.000712	C1QA,CDKN1A,CH25H,EDNRB,FABP5,ITGAM,ITGB2,Prg4,SERPINE1
IGF1R	-0.545	transmembrane receptor		-0.154	0.000307	CD300C,CD53,CD68,CD84,CDK1,CDKN1A,CTSD,IGFBP3,IL6,IRS1,ITGAM,LPL,mir-297,PLAU,RACGAP1,TGFBI
ARRB1	-0.049	transcription regulator		-0.152	3.9e-05	Ccl2,IL6,LPL,MMP3,SERPINE1,SPP1
PIAS3	-0.112	transcription regulator		-0.152	0.000214	FGG,MMP13,MMP3,SERPINA3
SERPINA1	1.052	other		-0.152	0.000807	CCL2,IL1RN,IL6,MMP13,TLR2
GRHL2	-0.374	transcription regulator		-0.152	0.00161	CLDN4,mir-8,MMP14,TGM1
ADORA2A	0.211	G-protein coupled receptor		-0.152	0.0065	ATP1A2,Ccl2,CXCL10,Gm10400,HHIP,HMOX1,IL6,NR4A2
n-3 fatty acids		chemical drug		-0.152	0.0113	CCL2,HMOX1,IL6,IRS1
CD247	0.035	transmembrane receptor		-0.152	0.0315	CYBA,FCER1G,FCGR2A,TFEC
IHH	0.008	enzyme		-0.146	2.58e-07	Ccl2,CD72,CXCL10,HHIP,IL6,KDR,MMP13,PF4,SPP1
5-fluorouracil		chemical drug		-0.141	0.000803	BIRC5,CCNG1,CD80,CDK1,CDKN1A,CSTB,CTSD,GSN,HMOX1,mir-8,NOP56,PRC1,RPL10,SLC7A11,THBS1,TNFRSF12A,UBE2C
fasudil		chemical drug		-0.14	0.00156	ARG1,CCL2,Ccl2,CD14,IL6
FADD	0.102	other		-0.137	0.00309	Ccl2,CDK1,CDKN1A,CXCL10,IL6,IRF7,Mx1
ID3	0.033	transcription regulator		-0.136	3.61e-05	ADM,CCNG1,CCR1,CCR5,CD72,CDK1,CDKN1A,CSF2RB,FCER1G,GADD45G,IFI16,IL6,IL7R,LGALS1,SOCS3
3,4,5,3',4'-pentachlorobiphenyl		chemical toxicant		-0.134	0.00739	CA3,CTSD,CYP1A1,HSPA1A/HSPA1B,IGFBP3,TNC
NR1H3	-0.25	ligand-dependent nuclear receptor		-0.13	1.64e-23	ANLN,APOC2,BIRC5,C1QA,CCL2,Ccl2,CCL3L3,Ccl7,CCNA2,CCNB2,CCR1,CCR2,CCR5,CDK1,CDKN1A,CFB,CH25H,CLEC4E,CXCL10,CXCL16,DHRS9,FCGR1A,IL1RN,IL6,IRF7,KNL1,LAIR1,LPL,LY86,MKI67,Mt2,NUSAP1,PLAU,PRC1,TOP2A,UBE2C,VCAN,ZBP1
carbenoxolone		chemical toxicant		-0.13	0.000171	BIRC5,CYBA,IL6,SPP1,TIMP1
TEAD1	-0.332	transcription regulator		-0.128	0.000703	ADM,CDKN1A,COL5A2,FIBIN,MYH6,THBS1,TNNT2
BCL2L1	0.246	other		-0.128	0.0016	ALOX5AP,Ccl2,FN1,mir-181,THBS1,TIMP1
dopamine		chemical - endogenous mammalian		-0.128	0.0325	CTSK,CYP4F8,FST,GRIA1,GUCY1A1,HMOX1,IL6
O6-benzylguanine		chemical drug		-0.118	2.95e-05	CCNB2,CDKN1A,H2AX,MKI67
SQSTM1	0.059	transcription regulator		-0.114	0.00483	Ccl7,CXCL10,HMOX1,IL6,RSAD2
mir-217	-0.036	microRNA		-0.106	4.83e-05	HMOX1,IL6,IRS1,NR4A2
filgrastim		biologic drug		-0.103	1.61e-11	ANXA1,BEX3,CCL3L3,CD177,CLEC4D,CLEC5A,CLEC7A,CXCL10,CYBB,DHRS9,EPSTI1,FABP5,FCER1G,HHIP,ISG15,ITGAM,KNL1,LAIR1,LGALS12,LGALS3,MMP12,MMP8,MPEG1,MS4A4A,MS4A6A,NAIP,NDC80,PF4,PLD4,RGS1,RSAD2,SPP1,TLR8,ZBTB20
DNMT3B	-0.087	enzyme		-0.102	0.00148	ACTC1,CDK1,CDKN1A,GUCY1A1,KDR,LACC1,MYH6,RGS4,SLC7A11,SLN,TNNT2
TWIST1	0.221	transcription regulator		-0.093	5.5e-07	AOPEP,CCL2,Ccl2,CCN4,CDKN1A,CHAD,CLDN4,FIBIN,FN1,GSN,IL6,LRG1,PDZD2,SPP1,TGFBI,VCAN
tetrachlorodibenzodioxin		chemical toxicant		-0.084	2.64e-07	ADM,CA3,CCNA2,Cd52,CDKN1A,CTSD,CTSV,CYP1A1,FMO3,HMOX1,HSPA1A/HSPA1B,IL6,IRS1,ITGAX,MARCO,MMP13,MMP14,MYH6,PF4,S100A8,S100A9,Saa3,SERPINE1,TGM1,TNC
triamcinolone acetonide		chemical drug		-0.067	0.00109	BCL2A1,BMP6,CHL1,IGFBP3,IRF7,KLF15,MMP13,PF4,PLAU,SEMA6A,SERPINA3,SPP1
salvin		chemical toxicant		-0.063	2.83e-05	CCL2,CD14,IL6,ITGAM,MMP3
anisomycin		chemical - endogenous non-mammalian		-0.056	2.3e-05	CDKN1A,CYBB,CYP1A1,IL6,IRS1,PLAU,SERPINE1,SPP1
APC	-0.047	enzyme		-0.056	3.62e-05	AREG,BIRC5,CDKN1A,DHRS9,IL6,LPL,mir-181,mir-8,MMP3,SPP1,TIMP1,TNFRSF12A
FHL2	-0.05	transcription regulator		-0.053	9.17e-06	ADGRE1,ARG1,Ccl2,CLEC10A,CNN1,CTSD,CXCL10,SPP1
FOSL1	0.932	transcription regulator		-0.044	5.96e-08	ADM,CCL2,Ccl2,CCL3L3,Ccl6,Ccl7,IL6,MMP13,MMP3,PLAU,SERPINE1
benzo(a)pyrene		chemical toxicant		-0.038	1.07e-06	ANXA1,BIRC5,CDKN1A,COL8A1,CYP1A1,ECT2,EREG,FST,GNAO1,HAS2,HMOX1,HSPA1A/HSPA1B,Mt2,Mx1,RGS5,Saa3,SERPINE1,THBS1
VHL	0.212	transcription regulator		-0.033	0.0252	CDKN1A,CLDN4,CNN1,FN1,H2AX,HMOX1,MMP14
XDH	-0.1	enzyme		-0.022	9.02e-06	Ccl2,CCR5,CYBB,MMP14,PLAU,SERPINE1,SPP1
Collagen type II		complex		0	6.23e-09	BMP6,Ccl2,CCL3L3,CCR2,IL1RN,IL6,MMP19,SIGLEC1,TLR7,TLR8
semaxinib		chemical drug		0	6.84e-07	ARG1,HMOX1,IL6,KDR,LCN2,LTF,NR4A2,THBS1
levofloxacin		chemical drug		0	8.49e-06	CDKN1A,HAS2,IL6,MMP3
ibuprofen		chemical drug		0	1.35e-05	CYBB,EDNRB,IL6,ITGAM,MMP13,PLIN2,SERPINA3
TENM1	0.126	transmembrane receptor		0	2.95e-05	CHL1,EDNRB,GPNMB,SEMA6A
OSCAR	0.039	other		0	3.9e-05	CCR2,IL1RN,ITGAM,MMP19,TLR7,TLR8
spermine		chemical - endogenous mammalian		0	0.000156	CCL2,IL6,ITGB2,TLR2
PTPRE	0.063	phosphatase		0	0.000214	Ccl7,MARCO,PLA1A,SLFN12L
HOXA11	0.059	transcription regulator		0	0.00113	ANXA1,CTSV,NRCAM,SPP1
NPM1	0.247	transcription regulator		0	0.00121	CCL2,Ccl2,IL6,LTF,MMP8
SB 216763		chemical - kinase inhibitor		0	0.0022	CCL2,IL6,NR4A2,PLAU,RGS1
mir-23	-0.68	microRNA		0	0.00222	GATM,PDE8B,SEMA6A,SPP1
baicalin		chemical - endogenous non-mammalian		0	0.00245	BIRC5,CCNG1,HMOX1,IL6,TLR2
PLK2	0.277	kinase		0	0.00258	Ccl7,CXCL10,MARCO,RGS1
LTB4R	-0.041	G-protein coupled receptor		0	0.00298	Ccl2,CCL3L3,CLEC10A,CLEC7A
proteasome inhibitor PSI		chemical - protease inhibitor		0	0.00389	Ccl2,CYP1A1,HMOX1,IL6
CHADL	-0.021	other		0	0.00389	Ccl2,CDKN1A,IGFBP3,IL6
sildenafil		chemical drug		0	0.00497	CXCL13,CYBB,HMOX1,PDE5A
DRD2	-0.358	G-protein coupled receptor		0	0.00497	Abcb1b,CCL2,EDNRB,IGFBP3
amiodarone		chemical drug		0	0.00559	CA3,CYP1A1,HMOX1,MYH6
TCF12	0.134	transcription regulator		0	0.00676	CCR2,CD200R1,CD200R1L,CDKN1A,FN1,IL7R,LILRB4
FOXC2	0.139	transcription regulator		0	0.00985	CFD,FN1,IRS1,KDR,LPL
EFNA3	0.165	kinase		0	0.0113	FABP5,IRF7,TGM1,UBE2C
EFNA5	0.24	kinase		0	0.0123	FABP5,IRF7,TGM1,UBE2C
IL2RG	0.469	transmembrane receptor		0	0.0261	IL6,IL7R,IRF7,SPRR1A
GPER1	0.045	G-protein coupled receptor		0	0.0278	CDKN1A,LTF,NR4A2,PTGER4
EFNA2	-0.277	kinase		0	0.0278	FABP5,IRF7,TGM1,UBE2C
PKD1	-0.408	ion channel		0	0.0372	Acp5,ACSS1,Ccl2,CDKN1A,CXCL16,GATM,GREM1,mir-8,SYNE1
trichloroethylene		chemical toxicant		0	0.0396	CCNG1,CD63,CYP2E1,IGFBP3
RARG	-0.512	ligand-dependent nuclear receptor		0	0.049	AREG,FOLR2,HAS2,IL6,MAFB
GAS6	-0.09	growth factor		0.012	0.00136	CD68,IL6,MSR1,SOCS3
Il3	-0.131	cytokine		0.039	6.75e-08	ADGRE1,CD14,CD68,CDKN1A,IL6,ITGAM,LCN2,LTF,MMP13,MMP3,SPP1,TNFRSF1B
3-methyladenine		chemical toxicant		0.044	0.00624	CD80,HMOX1,IL6,MMP13
MYC	0.936	transcription regulator		0.045	1.58e-08	ACSS1,ADM,AOPEP,ARG1,BCL2A1,BIRC5,Ccl6,CCN4,CCNA2,CCNB2,CDK1,CDKN1A,COL5A2,COL8A1,CSTB,CTSB,CTSD,CTSV,CXCL10,FABP5,FN1,GADD45G,HAS2,HMOX1,IFI16,IRF7,IRS1,ITGAM,ITGAX,KDR,LGALS1,LGMN,mir-8,MKI67,Mt2,NOP56,OAS1,PLA1A,PLAU,RPL10,RPS2,RSAD2,S100A6,SERPINE1,SLC11A1,SPP1,SPRR1A,TAF1D,TGM1,THBS1,TIMP1,TLR7,TNC,TNFRSF12A,UBE2C
GW9662		chemical reagent		0.047	6.43e-05	CCL2,CD14,CDKN1A,FN1,IL6,KDR,LCN2,NR1D1,PLIN2
NFKBIB	0.166	transcription regulator		0.068	0.000123	BCL2A1,CCL2,CD80,CTSV,IL6,PLAU,Saa3
ID2	0.765	transcription regulator		0.068	0.00105	ADM,CCNG1,CCR1,CCR5,CDK1,CDKN1A,CSF2RB,FCER1G,GADD45G,IFI16,IL7R,LGALS1,SOCS3
NRIP1	0.057	transcription regulator		0.075	0.000391	AREG,CCNB2,CDK1,CDKN1A,CYP1A1,HAS2,IL6
TRAF2	0.05	enzyme		0.08	5.8e-05	ADM,CCL2,CCR1,CD80,CDK1,CXCL10,IL6,LILRB4,MPEG1
Laminin (complex)		complex		0.08	0.0113	CCL2,FN1,PLAU,SERPINE1
BMP4	-0.175	growth factor		0.085	0.000321	Ccl9,CCNG1,CDKN1A,CNN1,GREM1,Hamp/Hamp2,IL6,KDR,LAMA1,MMP13,MMP14,MMP3,TBX3
PTK2	-0.259	kinase		0.093	3.33e-08	Ccl2,CDKN1A,FN1,IL6,IRS1,MYH6,PCOLCE2,SPP1,THBS1,TIMP1,TNC
TFAP2A	0.544	transcription regulator		0.107	1.07e-05	ANXA1,BIRC5,CDKN1A,EREG,FGFR4,LIPA,MMP14,PLAU,PSAP,SERPINE1,TIMP1
C3AR1	2.912	G-protein coupled receptor		0.114	0.000222	Ccl2,CCL3L3,CD80,CXCL10,IL6,SERPINE1
MAPK1	0.018	kinase		0.115	1.17e-08	ATP1A2,BIRC5,CCL2,CCL3L3,CD84,CDKN1A,CFB,CTSB,FN1,HMOX1,IFI16,IFI30,IL1RN,IL6,IRF7,ISG15,LGALS1,LGALS3,MKI67,MMP13,OAS1,OAS2,PHF11,PLAU,SERPINE1,SPP1,TNFRSF1B,UBE2C
vitamin D		chemical drug		0.116	3.33e-08	BIRC5,CCL2,CCL3L3,CDK1,CDKN1A,CYP1A1,IL6,mir-181,MKI67,S100A8,SPP1
SB 290157		chemical reagent		0.128	5.2e-06	ADGRE1,C3AR1,CD80,IL6,SPP1,THBS1
caffeine		chemical drug		0.13	0.00916	CDK1,CDKN1A,CTSK,ITGAM,THBS1
indican		chemical - endogenous mammalian		0.132	0.00341	CCL2,CDKN1A,HMOX1,THBS1
RICTOR	-0.081	other		0.135	0.0455	ATP6V0D2,FABP5,IFI16,IL7R,ISG15,Mx1,OAS2,PHF11,RPL10,RPS2,Slfn2
conjugated linoleic acid		chemical drug		0.137	1.96e-05	Acp5,CCR5,CTSK,FCGR2B,IL1RN,ITGB2,SOCS3
rolipram		chemical drug		0.14	3.9e-05	ANXA1,AREG,CCL2,CD80,GRIA1,IL6
ADCYAP1	0.21	other		0.146	0.000594	BMP6,Ccl2,CCL3L3,CCNA2,CD80,COL5A2,CXCL10,FST,IL6,ITGAM,LAMA1,SERPINA3,SOCS3,TGFBI
BPIFA1	-0.218	other		0.152	0.000156	IL6,LTF,mir-8,MUC5B
CTSB	1.358	peptidase		0.152	0.000209	ARG1,CTSB,CTSV,CYBB,KDR
exenatide		biologic drug		0.152	0.000512	ARG1,GLP1R,HMOX1,IL6,ITGAM
EFNA4	0.017	kinase		0.152	0.00939	FABP5,IRF7,TGM1,UBE2C
ZEB2	0.125	transcription regulator		0.152	0.0354	CCL3L3,GATM,IL7R,mir-8
BDNF	-0.203	growth factor		0.155	0.0207	CD80,CDKN1A,GDA,GNAO1,GRIA1,IL6,LCN2,LGALS1,MYO5A,RGS4,S100A9,SPP1,THBS1
PRDM1	-0.24	transcription regulator		0.16	0.000112	BCL2A1,Ccl2,CD53,CYTH4,FGG,IL6,IL7R,IRF7,LGALS1,LIPF,MAFB,MS4A4A,RSAD2,S100A8,S100A9,SERPINA3
MED1	-0.042	transcription regulator		0.16	0.000803	ANKRD37,BIRC5,CDK1,CDKN1A,CFD,CYP1A1,HAS2,IGFBP3,OLR1,TBX3,THBS1
USF2	0.102	transcription regulator		0.163	0.0016	Hamp/Hamp2,HMOX1,IGFBP3,SERPINE1,SPP1,THBS1
retinoid		chemical drug		0.164	0.000599	CDKN1A,FOLR2,IGFBP3,TGFBI,TLR2
budesonide		chemical drug		0.184	4.22e-05	Ccl2,CCL3L3,CDKN1A,CXCL10,ECT2,GNAO1,IL6,ITGAM,RGS5
FUS-DDIT3		fusion gene/product		0.186	7.03e-05	FN1,IL6,LCN2,MMP3,RGS4,SERPINE1
Rp-cAMPS		chemical - kinase inhibitor		0.2	3.85e-05	GRIA1,HMOX1,MMP14,MMP3,SPP1
ascorbic acid		chemical - endogenous mammalian		0.204	8.24e-05	Abcb1b,CCNB2,CDKN1A,IGFBP3,IL6,MMP13,SERPINE1,SPP1
NFATC2	0.361	transcription regulator		0.215	2.19e-06	Ccl2,CCL3L3,CCNA2,CCR5,CD80,CDKN1A,CXCL10,GPNMB,IL6,IRF7,ISG15,PDZD2,RGS1,RSAD2,SLFN12L,SOCS3,TLR2
GLI2	-0.362	transcription regulator		0.218	2.61e-06	CCL3L3,CCR1,CCR5,CDK1,CDKN1A,CLEC7A,CXCL10,HHIP,IL6,MMP13,MMP3,SPP1
STUB1	0.163	enzyme		0.218	0.00108	BIRC5,CCNA2,CDK1,CDKN1A,CTSS,IL6
CDKN2A	0.222	transcription regulator		0.22	3.3e-10	BIRC5,CCL2,Ccl2,CCL3L3,Ccl6,Ccl7,Ccl9,CCNA2,CCNG1,CDK1,CDKN1A,CXCL10,CXCL13,FST,GADD45G,GTSE1,H2AX,IL6,LGALS3,mir-8,MKI67,MMP3,RRM1,S100A6,SERPINE1,SH3BP2,TNFRSF1B
MMP2	0.47	peptidase		0.221	0.000807	CDKN1A,CSF2RB,FN1,IL1RN,IRF7
Insulin		group		0.224	3.36e-07	ACTC1,BIRC5,CA3,CCL2,Ccl2,CDKN1A,CYBB,CYP1A1,FGFR4,FN1,HMOX1,HPSE,IGFBP3,IL6,IRF7,IRS1,LGALS12,LPL,mir-181,MMP13,MMP3,NR4A2,Orm1 (includes others),PTPRN,SERPINE1,TGFBI,THBS1,TLR2,TNC
NR4A1	-1.277	ligand-dependent nuclear receptor		0.233	0.0426	ADM,BIRC5,Clca3a1/Clca3a2,GREM1,HMOX1,IL6,LPL,NR4A2,SERPINE1,SLC37A2,UBE2C
carbon monoxide		chemical - endogenous mammalian		0.234	1.26e-05	CCL2,CD14,CDKN1A,FN1,Hamp/Hamp2,HMOX1,IL6,SERPINE1
EGLN1	-0.065	enzyme		0.239	6.52e-05	ADM,AREG,Ccl2,Hamp/Hamp2,IL6,MMP13,MMP3,MMP8
1,25-dihydroxyvitamin D		chemical drug		0.243	0.00014	FST,IL6,MMP3,TLR2,TLR7,TLR8
albuterol		chemical drug		0.254	0.00011	CCR2,CCR5,IL6,RGS5
LIPG	-0.414	enzyme		0.254	0.000483	CCL2,IL6,LPL,MSR1
CALCA		other		0.254	0.0027	Acp5,CCL2,CTSK,CYBA,IL6,KDR,MKI67
LEPR	-0.707	transmembrane receptor		0.263	2.04e-12	ADGRE1,Ccl2,CCL3L3,CD63,CD68,CYP2E1,FN1,GADD45G,IGFBP3,IL1RN,IL6,ITGAM,LCN2,LGMN,LPL,MMP12,MMP13,MMP14,MMP19,MMP3,SERPINE1,SOCS3,TIMP1
IL1R1	0.541	transmembrane receptor		0.263	0.000974	Ccl2,CCL3L3,Ccl7,CXCL10,IL6,TIMP1
heme		chemical - endogenous mammalian		0.275	1.99e-05	Ccl2,CCL3L3,CD14,CXCL10,CYBB,HMOX1,IL6,LCN2
sanguinarine		chemical - endogenous non-mammalian		0.277	8.49e-06	BIRC5,CCL2,HMOX1,TIMP1
HOXC8	-0.115	transcription regulator		0.277	0.000512	Ccl2,Ccl7,CNN1,CXCL10,SPP1
nonylphenol		chemical toxicant		0.277	0.00138	CCL2,CXCL10,EREG,HSPA1A/HSPA1B,S100A6
FYN	0.169	kinase		0.277	0.0022	Ccl2,CXCL10,GRIA1,IL6,SOCS3
CIP2A	1.097	other		0.277	0.0129	CFB,CIP2A,COL8A1,GPNMB,LAMA1
TEAD4	-0.037	transcription regulator		0.277	0.0197	ADM,CDKN1A,COL5A2,FIBIN,THBS1,TNNT2
RARRES2	0.088	transmembrane receptor		0.283	0.000758	Ccl2,CCNA2,CCNB2,IL6
BCR (complex)		complex		0.283	0.000762	BCL2A1,CCNA2,CD80,IL6,LAIR1,mir-8,MS4A6A,PTAFR,SLAMF7
ilomastat		chemical drug		0.283	0.000931	CCL2,Ccl2,CXCL10,IL6
berberine		chemical drug		0.29	7.08e-06	Abcb1b,BIRC5,CCL2,CD80,CDKN1A,CYP1A1,CYP2E1,FN1,HMOX1,IL6,TIMP1
Iga		complex		0.298	2.04e-05	CD80,CXCL10,FCGR1A,FCGR2B,IL6
SMARCB1	0.172	transcription regulator		0.312	0.000357	CCNA2,CDK1,CDKN1A,COL5A2,CYP2E1,CYP4F8,FCGR1A,FCGR2A,GSN,IFI16,KIF11,OAS1
FOXO3	-0.196	transcription regulator		0.318	5.49e-11	ANXA1,ATP6V0D2,BIRC5,C1QA,CCNB2,CDKN1A,CDKN3,CH25H,CTSB,CTSV,CXCL10,EDNRB,FABP5,FN1,HMGCS2,IL6,ITGAM,ITGB2,LCN2,MKI67,MMP13,Mt2,NCAPG2,PBK,PLAU,Prg4,SERPINE1,TNFRSF1B,TPX2,UBE2C
cyclopamine		chemical reagent		0.321	0.000807	CD14,CDKN1A,HHIP,MKI67,SPP1
ELANE	-0.328	peptidase		0.322	0.000367	CCL3L3,CD14,CTSB,HMOX1,IL6
TXNIP	-0.152	other		0.322	0.00245	CCNA2,CDKN1A,IL6,LPL,mir-8
RORA	-0.207	ligand-dependent nuclear receptor		0.325	2.55e-07	Aox3,Ccl2,CCL3L3,CH25H,CXCL10,CYP2E1,CYP4F8,CYP7B1,IL6,LCN2,Mt2,MUC5B,NR1D1,PLIN2,S100A8,S100A9,Saa3,SOCS3
MMP1	-0.152	peptidase		0.327	0.00483	CDKN1A,FN1,KDR,PLAU,SERPINE1
prostaglandin A1		chemical - endogenous non-mammalian		0.346	2.83e-05	CD14,CDKN1A,HMOX1,HSPA1A/HSPA1B,IL6
raloxifene		chemical drug		0.359	1.24e-05	AREG,CDKN1A,HMOX1,HSPA1A/HSPA1B,IFI30,IL6,KYNU,MKI67,MMP13,MMP3,SERPINE1,SPP1,TIMP1,TOP2A
entinostat		chemical drug		0.361	4.93e-08	BIRC5,CDKN1A,CXCL10,GSN,H2AX,IGFBP3,ITGAM,ITGAX,MMP13,MMP3,SERPINE1
gefitinib		chemical drug		0.365	1.74e-09	AREG,BIRC5,CCL2,Ccl2,CKAP2,COL8A1,CTSB,ECT2,EPSTI1,HMOX1,KIF11,LTF,mir-8,MKI67,MMP3,PF4,PRC1,S100A9,TLR2,TOP2A
norepinephrine		chemical - endogenous mammalian		0.368	0.00804	Ccl2,Ccl9,FN1,FST,HHIP,HMOX1,IL6,PDE8B,SERPINE1
CCL4	0.198	cytokine		0.371	0.000287	CCL2,CCR1,CCR5,IL6
rotenone		chemical toxicant		0.378	2.64e-05	CYBB,GADD45G,HMOX1,IL6,ITGAM,KDR,NR4A2,TIMP1
IgG		complex		0.379	7.27e-17	ADM,CCL2,Ccl2,CCR2,CDKN1A,CLDN4,CLEC5A,CXCL10,FABP5,FCGR1A,FCGR2A,FCGR2B,FN1,FOLR2,FST,IL1RN,IL6,ISG15,ITGAM,LCN2,LGALS1,LGALS3,LY9,MAFB,MMP12,SERPINE1,SLAMF7,THBS1,TLR7,TNC
BGN	0.164	other		0.391	8.64e-05	CCL2,CCN4,CXCL13,MMP14,SERPINE1
3,3'-diindolylmethane		chemical drug		0.421	0.0106	BIRC5,CDKN1A,HMOX1,IL6,OAS2
tacrolimus		chemical drug		0.438	0.000621	AREG,CCL2,Ccl2,CXCL10,CYBB,FN1,Hamp/Hamp2,LILRB4,PLIN2,SPP1,TMEM100,TNC,TNFRSF12A,TNFRSF1B
ACE2	-0.61	peptidase		0.447	5.1e-07	CCL2,Ccl2,Ccl7,CXCL10,FN1,IL6,SERPINE1
TEAD2	0.014	transcription regulator		0.447	0.000108	ADM,CDK1,COL5A2,FGFR4,FIBIN,THBS1,TNNT2
DIO2	0.139	enzyme		0.447	0.000129	CCL3L3,FST,GADD45G,HSPA1A/HSPA1B,KLF15,LILRB4,MSR1,NR4A2,Orm1 (includes others),SLN,Tnfrsf22/Tnfrsf23,TSPAN18
trabectedin		chemical drug		0.447	0.000171	Abcb1b,CDK1,CDKN1A,H2AX,LGMN
THBS4	0.032	other		0.447	0.000255	Ccl2,CXCL10,MMP13,MMP8,TNC
ACTL6A	0.201	other		0.447	0.000435	CCNA2,CCNB2,CCNG1,CDKN1A,HMOX1
ASXL1	-0.036	transcription regulator		0.447	0.00245	ATP1A2,CFD,KLF15,LPL,SERPINE1
HOXD10	-0.398	transcription regulator		0.447	0.0113	CLEC10A,MMP14,RSAD2,SERPINE1,TIMP1
25-hydroxycholesterol		chemical reagent		0.449	0.0396	CH25H,HMOX1,IL6,NR4A2
9,10-dimethyl-1,2-benzanthracene		chemical toxicant		0.45	1.29e-06	AREG,ARG1,BIRC5,CDKN1A,CYP1A1,IL6,S100A8,S100A9,SERPINE1
8-bromo-cAMP		chemical reagent		0.45	0.00148	ADM,ARG1,Ccl2,CTSD,IL6,KDR,MYH6,RRM1,SERPINE1,SPP1,TIMP1
KDM2B	0.101	enzyme		0.455	0.0001	Ccl2,Ccl7,CDKN1A,CXCL10,mir-181,mir-8
VitaminD3-VDR-RXR		complex		0.463	0.00367	CD14,CDKN1A,CXCL10,IGFBP3,SPP1
WNT3A	-0.121	cytokine		0.478	7.13e-08	ADAMTS4,CCL3L3,CCN4,CD68,CFD,FN1,GADD45G,GPNMB,HAS2,HHIP,IL6,IRS1,KDR,LCN2,LGALS12,MMP13,MMP14,MYH6,SLC7A11,TBX3,THBS1,TNC,TNXB
ETV5	-0.394	transcription regulator		0.478	0.000373	BEX1,CLDN4,FN1,LCN2,LGALS3,MMP14,NRCAM,S100A6,SPP1
LRP6	-0.425	transmembrane receptor		0.48	0.00367	CD68,IL6,MMP13,MMP14,MMP3
NFE2L2	0.298	transcription regulator		0.481	4.41e-06	Acp5,AKR1B10,ATP6V0D2,CA3,Ccl2,CDKN1A,CFD,CTSD,CTSK,CXCL10,CYBB,FMO1,FN1,GADD45G,HMOX1,IL1RN,IL6,INMT,LPL,PLIN2,SERPINA3,SERPINE1,SLC7A11,SLC7A8,SOCS3
linoleic acid		chemical - endogenous mammalian		0.485	0.000103	Ccl2,IL6,KDR,LPL,OLR1,PLIN2,S100A8,S100A9
BTK	0.444	kinase		0.49	1.18e-05	ATP6V0D2,BCL2A1,CDKN1A,CXCL10,FABP5,HMOX1,IL6,ISG15,ITGAX,LILRB4,OAS2
JUND	-0.083	transcription regulator		0.492	1.38e-09	C1QB,C3AR1,Ccl7,CFD,CXCL10,CXCL16,CYBB,HMOX1,IL6,MMP13,MMP3,PLAU,SPP1,TIMP1
SNAI1	0.144	transcription regulator		0.492	0.00572	CCL2,CDKN1A,CLDN4,FN1,FST,GSN,MMP14,MYO5A,SERPINE1
NKX2-3	-0.126	transcription regulator		0.497	8.88e-06	ADM,ANKRD37,ANLN,CCNB2,CD68,CDKN1A,CDKN3,CLEC1A,CXCL16,IL7R,LGMN,MAMDC2,MYO5A,PLA1A,TMEM100,TNFSF18
halofuginone		chemical drug		0.497	0.00264	B4GALT6,EDNRB,GATM,IGFBP3,LGALS1,MMP13,MMP3,SPP1,TIMP1
phorbol 12,13-dibutyrate		chemical - endogenous non-mammalian		0.507	0.000807	Ccl2,CDKN1A,PTAFR,RRM1,SERPINE1
5-N-ethylcarboxamido adenosine		chemical reagent		0.513	6.99e-08	ADM,ARG1,CCL2,Ccl2,CCL3L3,CSF2RB,HMOX1,IL6,NR4A2,PDE5A,SERPINE1,SOCS3,THBS1,VCAN
IL11RA	-0.263	transmembrane receptor		0.513	1.07e-06	Ccl2,CCL3L3,Ccl6,Ccl7,IL6,MMP12,MMP3,SOCS3,TIMP1
FCER1G	1.564	transmembrane receptor		0.529	0.000171	CD300LD,IL1RN,IL6,Mx1,RSAD2
mir-27	-0.69	microRNA		0.535	0.00623	BIRC5,IL6,PSAP,SEMA6A,SIGLEC1
alitretinoin		chemical drug		0.537	3.41e-10	ADAMTS4,BCL2A1,Ccl6,Ccl9,CD14,CDKN1A,CXCL10,CXCL13,DHRS9,FN1,FOLR2,IL6,ISG15,ITGAM,LTF,MKI67,MYH6,PLAU,SPP1
carbonyl cyanide m-chlorophenyl hydrazone		chemical toxicant		0.555	0.00442	ALOX5AP,BMP6,CTSV,LCN2,SERPINE1
EFNA1	-0.409	other		0.555	0.0106	FABP5,FN1,IRF7,TGM1,UBE2C
prostaglandin J2		chemical - endogenous mammalian		0.559	0.00497	CDKN1A,HMOX1,HSPA1A/HSPA1B,IL6
MMP9	0.613	peptidase		0.564	8.45e-11	Acp5,Ccl2,CCL3L3,CD68,CDKN1A,CTSB,CTSK,IL6,MMP12,MMP13,MMP14,MMP3,MUC5B,TIMP1,TYROBP
SOX2	0.144	transcription regulator		0.577	0.0364	ADAMTS4,BIRC5,CCN4,CDKN1A,FGFR4,FST,GSN,IRS1,KDR,mir-8,SEMA6A,SERPINE1,SPRR1A,TBX3,TGM1,TMEM100,VCAN
mitomycin C		chemical drug		0.593	0.00574	BIRC5,CCNB2,CD80,CDKN1A,DESI2
MAPK11	0.42	kinase		0.594	0.00441	HMOX1,IL6,MYH6,TIMP1
IL32		cytokine		0.611	5.29e-05	CCL2,CTSK,IL6,ITGAM,ITGB2,MMP13,MMP3
THPO	-0.132	cytokine		0.614	0.00403	BIRC5,CCNA2,KDR,PF4,SOCS3
glutathione		chemical - endogenous mammalian		0.617	7.45e-06	BIRC5,Ccl2,CCL3L3,CDKN1A,HMOX1,IL6,SERPINE1,SLC7A11,TNC
TGFBR1	0.795	kinase		0.617	1.24e-05	BIRC5,CDKN1A,FN1,Hamp/Hamp2,HAS2,HMOX1,mir-8,MMP13,SERPINE1,TGFBI
CCN2	0.733	growth factor		0.618	5.7e-06	ADAMTS4,BCL2A1,BIRC5,COL8A1,FN1,IL6,MMP13,MMP14,MMP3,SERPINE1,TIMP1
staurosporine		chemical - kinase inhibitor		0.622	4.25e-08	Ccl6,CD53,CDKN1A,CYP1A1,CYP2E1,FCGR2A,HMOX1,IL6,ISG15,ITGB2,LILRB4,MMP13,PLAU,SERPINA3,SERPINE1
HIPK2	-0.418	kinase		0.623	0.0043	ALOX5AP,CDKN1A,DIAPH3,Hamp/Hamp2,HMOX1,LGALS3
E2f		group		0.625	0.000928	CCNA2,CDK1,H2AC11,NUSAP1,PRR11,SERPINE1,TGM1,TPX2,UBE2C
benzene		chemical toxicant		0.625	0.00916	CCNG1,CD63,CDKN1A,CYP2E1,IGFBP3
adenosine		chemical - endogenous mammalian		0.633	3.99e-07	CD80,HMOX1,IL6,ITGB2,NR4A2,Saa3,SERPINE1,SOCS3,TIMP1
Hsp70		group		0.634	0.0113	Ccl2,CD14,IL6,TYROBP
bromobenzene		chemical toxicant		0.64	9.24e-05	CDKN1A,CTSV,CYP2E1,FMO1,FMO3,HMOX1,Mt2,TIMP1
POU5F1	-0.054	transcription regulator		0.64	0.0305	BCL2A1,BIRC5,CDKN1A,CXCL10,GADD45G,IL6,IRS1,mir-8,NAIP,SPP1,SPRR1A,TBX3,TGM1
IL7	0.318	cytokine		0.643	0.00238	CCL2,Ccl2,CDKN1A,CTSK,FN1,IL6,IL7R,MMP13,SOCS3
ALOX5	0.506	enzyme		0.647	8.43e-05	ATP6V0D2,CCL3L3,CDKN1A,CTSK,MMP12,MSR1
RARB	-0.478	ligand-dependent nuclear receptor		0.647	0.00381	BCL2A1,CDKN1A,FOLR2,Gm5431,IGFBP3,IL6,LTF,Saa3,SPP1,TGM1
IL13RA2	0.195	transmembrane receptor		0.651	3.98e-06	AREG,CLEC10A,LILRB3,MMP12,MMP14
CCL3		cytokine		0.651	6.71e-05	CCL2,CCR1,CCR5,IL6,ITGAM
MYB	-0.71	transcription regulator		0.66	3.47e-07	ADM,BIRC5,C15orf48,Ccl2,CD14,CDK1,CXCL16,FN1,IGFBP3,IL6,IL7R,KDR,LCN2,MMP3,Slfn2,SPP1,TFEC
LCN2	1.287	transporter		0.67	4.41e-11	ANLN,ARG1,Ccl2,CCL3L3,Ccl6,Ccl7,CCR1,CCR5,CKAP2,CXCL10,CXCL13,HMOX1,IL1RN,IL6,KIF11,SPP1
bucladesine		chemical toxicant		0.672	3.09e-11	ADCY8,ADM,AKR1B10,ANXA1,C3AR1,Ccl9,CCR5,CD14,CD80,CDKN1A,CXCL10,FCGR2A,FST,HAS2,HHIP,HMOX1,IGFBP3,IL6,ITGB2,LGALS12,mir-8,MMP13,MMP14,NR4A2,PDE5A,PDE8B,PLAU,PTGER4,SERPINE1,SOCS3,TIMP1
nicotine		chemical drug		0.672	3.11e-08	ATP6V0D2,BIRC5,CCL2,Ccl2,CD80,CDKN1A,CTSK,CYP2E1,FN1,GRIA1,HMOX1,IL6,ITGAM,KDR,LGALS3,SERPINE1,SPP1,TGM1
CD28	0.278	transmembrane receptor		0.675	0.000186	ANXA1,BCL2A1,CCR5,CD80,CH25H,CXCL13,FCER1G,HSPA1A/HSPA1B,IL6,IL7R,MSR1,Mx1,NAIP,PTGER4,SOCS3,THBS1,TNFRSF1B,TNFSF18
NUMB	-0.166	other		0.686	0.000758	CDK1,CDKN1A,IFI16,Mt2
5-azacytidine		chemical drug		0.686	0.0451	CDKN1A,IRF7,KDR,MYH6,PLAU,SOCS3,THBS1
fluticasone propionate		chemical drug		0.688	1.47e-11	ADM,C1QB,CCL2,CD80,CFB,CLEC12A,CXCL10,IL1RN,LPL,MMP19,OAS2,OLR1,PCOLCE2,PLAU,PLIN2,S100A8,SERPINE1,SPP1,THBS1,TIMP1,TM4SF19
EZH2	0.342	transcription regulator		0.691	0.00197	ALOX5AP,C15orf48,Ccl2,CCR5,CD63,CDKN1A,CEMIP,CXCL10,Ifi27l2a/Ifi27l2b,IGFBP3,IL6,LCN2,mir-8,S100A8,S100A9,SLC7A11,SOCS3,TBX3
IRF2	-0.227	transcription regulator		0.692	1.07e-06	ARG1,CD14,CDKN1A,CFB,CLEC10A,CTSS,CXCL10,FGG,IL6,IRF7,ISG15,LCN2,OAS1
ITGB3	0.338	transmembrane receptor		0.692	6.52e-05	CDK1,FN1,HAS2,KDR,MMP14,PLAU,SERPINE1,TIMP1
dexamethasone		chemical drug		0.694	1.53e-26	Abcb1b,Acp5,ACTC1,ADM,ALOX5AP,ANXA1,AREG,BCL2A1,BEX3,BIRC5,C1QB,C3AR1,CCL2,Ccl2,CCL3L3,Ccl7,CCNA2,CCR1,CCR2,CD177,CD80,CDKN1A,CFB,CFD,CHAD,Clca3a1/Clca3a2,CLEC4D,CLEC5A,CLEC7A,CTSB,CTSD,CTSK,CTSV,CXCL10,CYBB,CYP1A1,CYP2E1,DESI2,DHRS9,ECT2,EDNRB,EPSTI1,EREG,FABP5,FCER1G,FCGR2B,FGG,FMO1,FN1,FST,GLP1R,GPR65,HHIP,HMOX1,HPGDS,Ifi27l2a/Ifi27l2b,IGFBP3,IL1RN,IL6,IL7R,IRF7,IRS1,ISG15,ITGAM,KDR,KLF15,KNL1…
methotrexate		chemical drug		0.699	4.51e-07	C1QB,CCL2,CCNG1,CDKN1A,CFB,CTSS,CTSV,CXCL10,GSN,HMGCS2,HMOX1,IGFBP3,IL6,LILRB4,LPL,NR4A2,SOCS3,SPP1,THBS1
tamoxifen		chemical drug		0.702	1.99e-06	ADM,BIRC5,CCNA2,CDKN1A,CTSD,CYP2E1,F13A1,FN1,HAS2,IGFBP3,IL1RN,IL6,IRS1,KIF11,mir-181,mir-8,MKI67,NRCAM,SERPINA3,SPP1,SYNE1
IL22	0.404	cytokine		0.707	3.42e-09	CCL27,CCL3L3,CXCL10,CXCL13,CYBA,CYP2E1,HMOX1,IL6,LCN2,MMP3,MUC5B,S100A8,S100A9,SERPINA3,SOCS3,TFF2
HAVCR2	1.047	other		0.714	0.00011	CCR5,CD80,CDKN1A,IL6
Pkc(s)		group		0.717	7.79e-12	ADM,CCL2,CCR2,CCR5,CDKN1A,CNN1,CTSB,CYBB,CYP1A1,CYP2E1,FN1,HMOX1,IL6,IRS1,LIPA,MMP13,MSR1,NR1D1,NR4A2,PTPRN,S100A8,SERPINE1,SPP1,TGM1
VTN	-0.35	other		0.72	0.000599	CDKN1A,IRS1,ITGAM,PLAU,SERPINE1
ciprofibrate		chemical drug		0.724	9.9e-05	Abcb1b,APOC2,CD63,CSTB,CTSV,CYP2E1,CYP7B1,LCN2,LPL,Orm1 (includes others),PLIN2,Saa3
TXN	0.466	enzyme		0.725	0.0146	CDKN1A,CYP1A1,HMOX1,IL6
RPTOR	-0.05	other		0.728	1.06e-06	Acp5,ADGRE1,ATP6V0D2,BIRC5,Ccl2,CD80,CTSK,FCGR1A,IL6,IRS1,ITGAM,ITGAX
TCF21	-0.665	transcription regulator		0.728	7.45e-05	CDKN1A,IL6,MMP13,TIMP1
ROCK2	-0.061	kinase		0.728	0.000337	Ccl2,CNN1,FABP5,S100A8,SERPINE1,SPP1
dimethylnitrosamine		chemical toxicant		0.73	3.29e-05	CDKN1A,CYP2E1,FGFR4,HMOX1,IL6,Mt2,TIMP1
IRF6	0.02	transcription regulator		0.733	6.54e-06	ARG1,CCL2,CD14,CLEC10A,IL6,LCN2,NR4A2,PLAU
EPAS1	-0.632	transcription regulator		0.736	2.58e-06	ADM,AREG,ARG1,C1QA,CCR2,CCR5,CDKN1A,CEMIP,FN1,H1-2,IGFBP3,IL6,KDR,LPL,MMP13,MMP14,PLIN2,SERPINE1
TGFBR2	0.382	kinase		0.747	8.78e-13	ALOX5AP,ATP1A2,BIRC5,BMP6,Ccl2,Ccl7,CD14,CDHR1,CDKN1A,FN1,FST,GATM,IL6,KDR,MMP12,MMP13,MMP14,MMP3,SCN7A,SERPINE1,SOCS3,SPP1,THBS1,TIMP1,TNFRSF12A
HDAC6	0.316	transcription regulator		0.747	0.0022	BIRC5,IL6,PLAU,SERPINE1,TGFBI
FABP4	0.499	transporter		0.751	0.000255	Ccl2,FABP5,IL6,MSR1,SOCS3
isotretinoin		biologic drug		0.761	1.72e-07	CCL2,CDKN1A,IGFBP3,IL6,LCN2,MMP13,OAS1,OLR1,S100A9,SERPINA3,TLR2
cocaine		chemical drug		0.761	0.0194	CCL2,Ccl2,CCR5,GRIA1,IL6,mir-181,OAS1,PSAP,THBS1
mir-132	-0.39	microRNA		0.762	0.000367	CCL2,Ccl2,CCNA2,GRIA1,NR4A2
CYP1A1	-1.716	enzyme		0.762	0.017	CYP1A1,Ifi27l2a/Ifi27l2b,MARCO,Mt2,RACGAP1,TNNT2
SREBF2	-0.219	transcription regulator		0.762	0.0273	CDKN1A,CYP7B1,FABP5,LIPA,PLIN2
calcitriol		chemical drug		0.763	3.92e-15	Acp5,ANLN,AREG,BIRC5,C15orf48,CCNA2,CD14,CDK1,CDKN1A,CFD,CTSK,CXCL10,CYBB,CYP1A1,ECT2,FGG,FN1,GADD45G,GLRX,IGFBP3,IL1RN,IL6,IRF7,ISG15,ITGAM,ITGAX,LCN2,LGALS1,LILRB4,LPL,LTF,NUSAP1,PBK,PRC1,RACGAP1,RSAD2,S100A8,S100A9,SOCS3,SPP1,THBS1,TLR2,TLR7,TLR8,TMEM100,TPX2
4-(2-aminoethyl)benzenesulfonylfluoride		chemical - protease inhibitor		0.768	0.000512	ATP1A2,CDKN1A,FN1,HMOX1,TNC
Smad2/3-Smad4		complex		0.772	2.04e-05	CDKN1A,IGFBP3,IRF7,MMP13,SERPINE1
erlotinib		chemical drug		0.777	7.41e-09	AREG,CCL2,CCL27,CD14,COL8A1,CYBB,IL6,MMP13,MMP14,MMP3,PLAU,SERPINE1,TLR2,TNFRSF1B
zinc		chemical drug		0.777	0.00109	AKR1B10,BEX3,CNN1,HMOX1,IL6,LIPA,LIPF
2-amino-5-phosphonovaleric acid		chemical - other		0.788	0.0143	ANKRD37,ANLN,FHDC1,GADD45G,KDR,NR4A2,TSPAN18,Zfas1
heparin		chemical - endogenous mammalian		0.799	1.03e-07	AREG,CD80,CNN1,FN1,Hamp/Hamp2,HAS2,HPSE,IGFBP3,LPL,MMP14,PF4
MAP2K7	-0.348	kinase		0.808	0.000974	CDKN1A,CXCL10,FN1,MMP3,MUC5B,PLAU
6-hydroxydopamine		chemical toxicant		0.808	0.00309	CXCL13,CYBB,GADD45G,HSPA1A/HSPA1B,IL6,MMP3,NR4A2
INS	0.195	other		0.81	0.00771	ADM,Ccl2,CDKN1A,F7,IGFBP3,IL6,IRS1,LPL,PLIN2
BMP6	-1.071	growth factor		0.815	0.000232	CDKN1A,Hamp/Hamp2,HMOX1,IL6,MMP13,PCOLCE2,SERPINE1,TIMP1,TNFRSF12A
PLK4	0.777	kinase		0.816	2.53e-05	Ccl7,CXCL10,MARCO,MMP13,MMP3,RGS1
COLQ	-0.912	other		0.816	0.000919	COL5A2,COL8A1,FN1,LTBP4,MMP19,TIMP1,VCAN
SOX7	-0.19	transcription regulator		0.816	0.00399	KDR,MMP14,PLAU,SPRR1A,TGFBI,VCAN
PARP1	0.249	enzyme		0.83	0.00433	Ccl2,CDKN1A,CXCL10,HAS2,HMOX1,IL6,PLA1A,SH3BP2
PTH1R	0.133	G-protein coupled receptor		0.832	0.00389	CDK1,MMP13,NR4A2,SPP1
S-nitrosoglutathione		chemical toxicant		0.837	0.00197	CCL2,CDKN1A,CXCL10,IRS1,ITGAM
3-deazaneplanocin		chemical drug		0.84	0.0465	CDKN1A,GPNMB,IGFBP3,PLAU
FGFR2	-0.817	kinase		0.844	0.000544	CCN4,CDKN1A,FN1,FST,HHIP,LAMA1,mir-8,MYO1F,SPP1,TFEC
mercuric chloride		chemical toxicant		0.846	3.69e-06	CDKN1A,CYP2E1,HMOX1,HSPA1A/HSPA1B,Mt2,Orm1 (includes others),SPP1
azoxymethane		chemical toxicant		0.846	0.00249	CCL3L3,CDKN1A,CXCL10,IGFBP3,IL6,MKI67
POU2AF1	0.064	transcription regulator		0.849	0.0123	CCR5,LGALS1,MS4A6A,SPP1
CRH	-0.219	cytokine		0.853	0.0441	CCNA2,IL1RN,IL6,SOCS3
ESRRA		transcription regulator		0.863	0.00837	B4GALT6,LIPA,LPL,LTF,MYH6,NR1D1,Pln,SPP1,TOP2A
NR4A2	-1.066	ligand-dependent nuclear receptor		0.87	3.78e-05	ADM,AREG,CD80,HMOX1,LILRB4,MMP13,MMP3,NR4A2,ZBP1
ARNT	-0.155	transcription regulator		0.872	0.000869	ADM,AREG,CCR5,CTSD,CYP1A1,RGS5,SERPINE1,SOCS3,UBE2C
trichostatin A		chemical drug		0.874	5.23e-07	ADGRE1,ARG1,BCL2A1,CCL2,Ccl2,CCNA2,CCNB2,CD14,CDK1,CDKN1A,CTPS1,CXCL10,CYBB,CYP1A1,FGFR4,FN1,FST,GADD45G,GSN,HMGCS2,HMOX1,HPSE,IGFBP3,IL6,ITGAM,KDR,LGALS1,LGMN,mir-181,MMP13,MMP3,NR4A2,PLAU,SLC7A8,SPP1,TGM1,THBS1,TIMP1,TLR2,TNC,TOP2A,VCAN
nitric oxide		chemical - endogenous mammalian		0.894	7.16e-07	BIRC5,Ccl7,CCNG1,CDKN1A,CXCL10,HMOX1,HPGDS,IL6,IL7R,MKI67,MMP13,Mt2,SPP1,THBS1,UBE2C
leukotriene D4		chemical - endogenous mammalian		0.9	0.0278	CCL2,CCL3L3,IL6,NR4A2
GLI1	-0.319	transcription regulator		0.903	0.000458	BCL2A1,Ccl2,CDKN1A,HHIP,HPSE,IL6,IRS1,PCOLCE2,S100A9,SPP1,SYNE1,TMEM100,TNC
LBP	0.392	transporter		0.914	3.98e-06	CD14,CXCL10,IL1RN,IL6,TLR2
morphine		chemical drug		0.917	0.000449	ADM,CCL3L3,CCR5,CDKN1A,CYBB,GRIA1,IL6,ITGAM,THBS1,TLR2
GDF9	-0.044	growth factor		0.924	0.00695	GREM1,HAS2,PLAU,VCAN
indole-3-carbinol		chemical drug		0.927	0.00441	ANXA1,CDKN1A,FMO1,SPP1
HNRNPU	-0.672	transporter		0.934	0.000483	AREG,CCL2,IL6,SPP1
PML	-0.021	transcription regulator		0.946	0.00208	BIRC5,CDKN1A,EPSTI1,HMOX1,IRF7,ISG15,LPL,Mx1,OAS1,OAS2
IL11	0.048	cytokine		0.948	0.000123	BCL2A1,IL6,MMP13,SERPINA3,SOCS3,SPP1,TIMP1
WWTR1	0.038	transcription regulator		0.956	1.26e-05	CCNA2,CDKN1A,FN1,IL6,ITGB2,RRM1,SERPINE1,SPP1
SMPD1	0.233	enzyme		0.956	0.000294	CCL2,CCL27,CTSB,IL6,PF4,TLR2
TPSAB1/TPSB2	-0.093	peptidase		0.958	1.67e-05	FN1,IL6,MMP13,MMP3
TCR		complex		0.961	2.49e-07	ADM,BCL2A1,CCL3L3,CCR1,CCR2,CCR5,CTSB,CXCL10,CXCL13,GADD45G,IL6,IL7R,IRF7,ISG15,LIPA,OAS1,RPS2,RSAD2,SERPINA3,SOCS3,SPP1,TLR7,TNFRSF12A,TNFRSF1B,TNIP3
LRPAP1	0.242	other		0.961	9.31e-06	Ccl2,CCL3L3,IL6,LPL,SERPINA3,SERPINE1
AHR	-0.295	ligand-dependent nuclear receptor		0.969	6.21e-06	ADGRE1,ADM,AREG,CCNA2,CD14,CDK1,CDKN1A,COL5A2,CTSD,CXCL10,CYP1A1,FMO3,FN1,IL6,ITGAM,Mt2,Saa3,SERPINE1,SOCS3,SPP1,TGFBI,THBS1
OSMR	0.609	transmembrane receptor		0.97	4.82e-11	ADGRE1,BIRC5,C15orf48,Ccl2,CXCL10,IL6,ITGAX,LRG1,MMP13,Mt2,OAS1,PHF11,SOCS3,TIMP1
Gsk3		group		0.97	0.000703	BIRC5,IL6,IRS1,KDR,MYH6,NR4A2,SPP1
MYOD1	0.091	transcription regulator		0.984	4.4e-07	ACTC1,CCL2,CCNB2,CDK1,CDKN1A,DEPDC1,GADD45G,HAS2,IFI16,KNL1,MAFB,MKI67,MYH6,NDC80,NUSAP1,PBK,RACGAP1,TNNT2,TOP2A,TPX2
NCOA3	-0.06	transcription regulator		0.984	0.000666	CCNA2,CDKN1A,CYP1A1,HMOX1,IGFBP3,IRS1,KDR,PLIN2
ITGB4	0.307	transmembrane receptor		0.988	0.000376	AREG,BIRC5,EREG,IL6
SPHK1	0.176	kinase		0.99	4.54e-05	Ccl2,CDKN1A,FN1,IL6,SERPINE1,SOCS3,TIMP1
isoproterenol		chemical drug		0.992	2.49e-06	CCL3L3,CDK1,CYP1A1,CYP4F8,HMOX1,IL6,LGALS12,LGALS3,LPL,PLIN2,Pln,RGS5,TIMP1,TNXB
MAPK8	0	kinase		0.992	2.59e-06	Ccl2,CCNA2,CDKN1A,CXCL16,CYBB,CYP1A1,HMOX1,IL6,MMP13,MMP3,MSR1,MUC5B,PLAU,RGS4,TLR2
L-triiodothyronine		chemical - endogenous mammalian		0.999	0.00592	ACTC1,ADM,APOC2,Ccl6,CDKN1A,FOLR2,IGFBP3,IL6,LCN2,MAMDC2,MARCO,MMP14,MYH6,NR1D1,Pln,PTAFR,SERPINE1,SLAMF9
mitoxantrone		chemical drug		1	2.39e-07	CDKN1A,CXCL10,IFI16,IL6,IRF7,Mx1,OAS2,RSAD2
CTSK	1.985	peptidase		1	1.26e-06	Ccl2,CTSV,IL6,TLR7
TNFRSF9	0.746	transmembrane receptor		1	3.16e-05	BCL2A1,BIRC5,CD14,CD80,IL6,ITGAM
oligomycin		chemical - endogenous non-mammalian		1	4.83e-05	CXCL10,IL6,KDR,MMP13
IL4R	0.927	transmembrane receptor		1	7.11e-05	ARG1,Ccl2,CD14,FCER1G,IL6,MUC5B,SOCS3
ferulic acid		chemical - endogenous non-mammalian		1	0.000209	CDKN1A,HMOX1,MKI67,MMP13,TIMP1
E2F2	-0.142	transcription regulator		1	0.000703	BIRC5,CCNA2,CCNB2,CDK1,CDKN1A,IL6,SERPINE1
HOXD3	-0.03	transcription regulator		1	0.000758	IGFBP3,SERPINE1,TGFBI,THBS1
dexamethasone phosphate		chemical drug		1	0.00161	GADD45G,IL6,SCN7A,THBS1
P2RY2	0.406	G-protein coupled receptor		1	0.00161	Ccl2,CDKN1A,HAS2,SERPINE1
NPC2	0.866	transporter		1	0.00298	Ccl2,CTSB,IL6,PTGER4
TEAD3	-0.014	transcription regulator		1	0.00403	ADM,COL5A2,FIBIN,THBS1,TNNT2
IL6ST	-0.041	transmembrane receptor		1	0.00527	IL6,LTF,SOCS3,SPRR1A,TNFRSF1B
bardoxolone		chemical drug		1	0.00624	CDKN1A,HMOX1,IRS1,MMP13
AIRE	-0.17	transcription regulator		1	0.0129	AKR1B10,CXCL10,LTF,S100A9,TLR8
ATF6	0.08	transcription regulator		1	0.0441	CDKN3,IL6,PLIN2,UBE2C
TET2	-0.081	enzyme		1.005	3.62e-12	APOBEC1,Ccl2,Ccl7,CLEC4D,FN1,H2AX,IFI16,IL6,ITGAX,ITGB2,LILRB4,MMP13,MMP8,Orm1 (includes others),RGS1,RSAD2,S100A8,TGM1,TIMP1,Tnfrsf22/Tnfrsf23,TNNT2
IL4	-0.111	cytokine		1.017	5.33e-26	Acp5,ADGRE1,ALOX5AP,ANXA1,ARG1,BIRC5,CCL2,Ccl2,CCL3L3,Ccl6,Ccl7,CCR5,CD14,CD200R1,CD300LF,CD72,CD80,CDK1,CDKN1A,CLEC10A,CLEC7A,CSF2RB,CTSK,CXCL10,CXCL16,CYBB,CYP2E1,F13A1,FCER1G,FCGR2A,FCGR2B,FCGR3A/FCGR3B,Fcrls,FN1,GADD45G,GATM,GTSE1,HSPA1A/HSPA1B,IFI16,IFI30,IL1RN,IL6,IL7R,IRF7,ISG15,ITGAX,ITGB2,LACC1,LGALS1,LGALS3,LILRB4,LPL,MAFB,MARCO,MKI67,MMP12,MMP3,MPEG1,MSR1,Mx1,PLAU,PLIN2,S100A8,S100A9,S…
PIK3CA	-0.216	kinase		1.029	0.000158	BIRC5,Ccl2,CD14,IRS1,ITGAM,KDR,SERPINE1,TGM1
hydroxyurea		chemical drug		1.033	0.00916	CCL2,CDKN1A,H2AX,LGALS12,OAS1
TNFSF13B	0.114	cytokine		1.038	0.000391	BCL2A1,CCL2,CD80,CTSS,FCGR2B,PLEK,SPP1
IGFBP3	-1.622	other		1.039	8.43e-05	CCL3L3,CDK1,CDKN1A,MMP13,SERPINE1,TNC
MAPK9	0.216	kinase		1.046	7.31e-06	CCL2,Ccl2,Ccl7,CDKN1A,CYP1A1,IFI16,IL6,LPL,MMP12,MMP3,MUC5B,PLA1A,PLIN2,SLFN12L
HOXA10	0.122	transcription regulator		1.053	1.4e-08	ADM,ALOX5AP,ATP1A2,CA3,CDKN1A,CFD,CTSV,CYBB,CYP2E1,DHRS9,FCER1G,FN1,FST,IGFBP3,INMT,LCN2,LTF,PTGER4,TNXB
SOX4	0.138	transcription regulator		1.066	0.022	BEX3,BIRC5,Ccl9,CD53,FCER1G,FN1,IFI30,KYNU,mir-181
rifampin		chemical drug		1.067	0.000449	CD14,CXCL10,CYP1A1,CYP2E1,ECT2,ITGAM,NUF2,RACGAP1,SPP1,TLR2
calcipotriene		chemical drug		1.067	0.00113	IL6,MMP13,PLAU,SPP1
YBX1	0.246	transcription regulator		1.067	0.0259	Abcb1b,Ccl2,CDKN1A,IGFBP3,MMP3
IGFBP2	0.672	other		1.067	0.0261	CCL2,FN1,IGFBP3,MMP13
ciprofloxacin		chemical drug		1.069	1.45e-07	ADGRE1,CCR1,CD68,CSF2RB,CTSD,CTSV,GUSB,LGMN,MPEG1,MSR1,NRCAM,PSAP,SPP1,TLR7
clodronic acid		chemical drug		1.069	1.71e-06	ARG1,Ccl2,CD80,CXCL10,HMOX1,IL6,MSR1
GW501516		chemical drug		1.069	2.35e-06	CDKN1A,CFD,IGFBP3,IL6,LPL,LTF,MMP12,Orm1 (includes others),PLIN2,S100A8,S100A9,THBS1
LTBR	0.175	transmembrane receptor		1.069	5.29e-05	BST1,Ccl2,CD80,CNN1,CXCL13,GDA,IL6
CD47	-0.069	transmembrane receptor		1.076	0.0019	Acp5,CTSK,IL6,KDR
FSH		complex		1.082	0.00373	ADM,AREG,CH25H,CTSV,EREG,FST,IGFBP3,IL1RN,IL6,LGALS1,PLA1A,PTPRN,RGS4,RGS5,SERPINE1,THBS1,TIMP1
NCOA1	-0.455	transcription regulator		1.082	0.0148	CDKN1A,CYP1A1,HAS2,IL1RN,IL6,KDR,OLR1,SERPINE1
8-chlorophenylthio-adenosine 3',5'-cyclic monophosphate		chemical - kinase inhibitor		1.086	0.00367	AREG,BIRC5,CDKN1A,NAIP,S100A8
MDM2	0.352	transcription regulator		1.087	0.000529	BIRC5,CCNA2,CDKN1A,IL1RN,THBS1,TIMP1,TOP2A
cyclomaltodextrin		chemical drug		1.091	1.05e-07	CCL3L3,CTSK,IL6,MMP14,MMP8,S100A8
naringenin		chemical - endogenous non-mammalian		1.091	0.000367	CLDN4,CXCL10,CYP1A1,HMOX1,TLR2
Ngf		group		1.091	0.0354	CDKN1A,MMP3,NR4A2,SERPINE1
pirinixic acid		chemical toxicant		1.095	6.55e-08	AKR1B10,APOC2,CCL2,Ccl2,CCNA2,CD63,CDK1,CDKN1A,CTSB,CYP1A1,CYP7B1,FABP5,FCER1G,H1-2,HMGCS2,HMOX1,IL1RN,IL6,ITGAM,KDR,LCN2,LGALS3,LPL,MMP13,NR1D1,Orm1 (includes others),PLIN2,PTAFR,SERPINE1
isobutylmethylxanthine		chemical toxicant		1.098	9.27e-07	AREG,Ccl2,CD14,CDKN1A,FN1,IRF7,ITGB2,LGALS12,LPL,MMP13,MMP3,Mt2,PLIN2,PTPRN,SERPINE1,THBS1,TIMP1,TNC
IRF9	0.297	transcription regulator		1.103	2.78e-05	CXCL10,IL6,IRF7,ISG15,OAS2,SOCS3,ZBP1
ADIPOR1	0.158	transmembrane receptor		1.103	0.00113	ARG1,CLEC10A,IL6,MMP3
MUC1		other		1.103	0.00789	ARG1,IL6,MKI67,MMP13,PLAU
TO-901317		chemical reagent		1.104	1.76e-07	Acp5,ADM,APOC2,CCL2,Ccl2,Ccl9,CH25H,CYP7B1,FABP5,FMO1,HMGCS2,IL6,LGALS3,LPL,MPEG1,Mt2,NR1D1,Orm1 (includes others),SERPINA3,TIMP1
TERT	-0.05	enzyme		1.106	4.24e-06	BIRC5,CDKN1A,COL5A2,EREG,GSN,IFI16,IL6,ISG15,MMP14,MMP3,PDGFC,SPP1,TBX3
N-formyl-Met-Leu-Phe		chemical reagent		1.107	8.28e-09	ANLN,CCL2,CCR5,CKAP2,CYBB,FCGR1A,ITGAM,ITGB2,KIF11,MMP8
corticosterone		chemical - endogenous mammalian		1.108	0.0142	ANXA1,Ccl2,CDKN1A,CYBA,IL6,TIMP1,TLR2
cyclosporin A		biologic drug		1.109	9.72e-09	ANXA1,CCL2,CCR5,CD14,CD68,CD80,CDKN1A,CLDN4,CYBA,EDNRB,FCGR2A,FN1,FST,GPNMB,H2AX,HMOX1,IL6,KDR,LCN2,LGALS3,MMP14,MMP3,Ms4a6b,NRCAM,S100A9,SERPINE1,SPP1,TFEC,TIMP1,TNFRSF12A
RAPGEF3	-0.279	other		1.109	2.04e-05	CTSK,FN1,SOCS3,SPP1,THBS1
KEAP1	0.208	transcription regulator		1.109	0.0001	Acp5,ATP6V0D2,CTSK,HMOX1,IL6,TOP2A
aphidicolin		chemical toxicant		1.109	0.00061	CDKN1A,MMP3,MYH6,OAS1
FLT1	-0.284	kinase		1.109	0.0233	BIRC5,Ccl2,CDKN1A,HMOX1,THBS1
IGF2	-0.324	growth factor		1.117	1.33e-07	AREG,BIRC5,Ccl2,CDK1,CDKN1A,CTSV,EREG,FN1,IGFBP3,IL6,MMP12,MMP3,RRM1,SERPINE1,SOCS3,SPP1,TGFBI
vorinostat		chemical drug		1.118	0.000335	BIRC5,CCL3L3,CCR1,CCR2,CCR5,CDK1,CDKN1A,CTSD,IL6,mir-8,MKI67,S100A8,S100A9,SOCS3,TOP2A
hemoglobin		complex		1.119	0.000287	ADM,CDKN1A,HMOX1,IL6
epinephrine		chemical - endogenous mammalian		1.121	0.00371	CDK1,CDKN1A,IL6,LPL,MMP13,MMP3
IL15	-0.059	cytokine		1.126	6.54e-06	ANXA1,CCL2,Ccl2,CCR1,CCR2,CD53,CD80,CD84,CDKN1A,CXCL10,FCGR3A/FCGR3B,FMO3,HMCN1,HMOX1,IL6,IL7R,ITGAX,MKI67,PLEK,PSAP,TIMP1,TLR2,TOP2A,TYROBP
thymoquinone		chemical drug		1.131	1.96e-05	BIRC5,CD14,CDKN1A,H2AX,HMOX1,MMP13,MMP3
TAZ	-0.094	enzyme		1.131	8.74e-05	ANXA1,CCL2,COL5A2,FN1,H2AX,HMOX1,IFI16,IRS1,RGS4,SERPINE1
GSK3A	-0.252	kinase		1.131	0.00061	IRS1,KDR,MYH6,SERPINE1
MASTL	0.857	kinase		1.131	0.0171	ANLN,KYNU,SERPINE1,TUBB6
deoxycholate		chemical - endogenous mammalian		1.131	0.0184	APOC2,CYP2E1,IL6,PLAU
LGALS3	1.4	other		1.133	1.01e-08	Ccl2,CCL3L3,CCNB2,CCR1,CCR2,CDKN1A,COL5A2,CTSV,FN1,IL6,ITGAM,LGALS12,MSR1,SOCS3
MSC	-0.105	transcription regulator		1.134	0.00014	CCL2,CHL1,EPSTI1,IRF7,LGALS12,SPP1,TLR7
RGS2	0.513	enzyme		1.134	0.00676	ADM,HEXB,IGFBP3,LPL,MARCO,SLC7A8,SPP1
camptothecin		chemical drug		1.141	1.29e-06	BCL2A1,BIRC5,CCL2,CCNG1,CCR1,CD300C,CD53,CDK1,CDKN1A,FCGR2B,GADD45G,GPNMB,H2AX,IFI16,IGFBP3,IL6,LGALS3,LILRB4,MYO5A,NR4A2,PDZD2,PLIN2,PTGER4,PTPRN,RRM1,RSAD2,SERPINE1,SPP1,SYNE1,TGFBI,TLR2,TNFRSF1B
CX3CL1	-0.222	cytokine		1.142	3.15e-08	BMP6,CCNB2,CD200R1L,CDHR1,FABP5,GPNMB,GSN,HMOX1,HPSE,IFI16,IL6,IL7R,IRF7,MSR1,SPP1,TIMP1
FAS	0.046	transmembrane receptor		1.147	1.66e-11	BCL2A1,BIRC5,CCL2,Ccl2,CCL3L3,CCR1,CD300C,CD80,CDKN1A,COL8A1,CXCL10,FCGR2B,GADD45G,GPNMB,IL6,LGALS3,LILRB4,MMP13,MYO5A,NR4A2,PLAU,PLIN2,PTGER4,PTPRN,RSAD2,SERPINE1,SPP1,TLR2,TLR8,TNC,TNFRSF1B
ITGAV	0.536	transmembrane receptor		1.15	3.69e-06	CDK1,CDKN1A,FN1,HAS2,PLAU,SERPINE1,TIMP1
SNAI2	-0.744	transcription regulator		1.154	0.0354	CDKN1A,FN1,mir-8,MMP14
geldanamycin		chemical drug		1.154	0.0363	ANXA1,BIRC5,CDK1,CYP1A1,GNAO1,H2AX,HEXB,HSPA1A/HSPA1B,IFI16,IRS1,KNL1
KLF4	-0.716	transcription regulator		1.162	1.99e-07	ACTC1,ADGRE1,ARG1,CCL2,CD14,CDKN1A,CLEC10A,COL8A1,CYP1A1,FN1,IL6,IRS1,ITGAM,KDR,LAMA1,MMP13,MYH6,SERPINE1,SPRR1A,TBX3,TGM1,THBS1,TNC
CRP	0.071	other		1.163	2.39e-07	CCL2,Ccl2,CCL3L3,IL1RN,IL6,ITGAM,LPL,SERPINE1
TBK1	0.077	kinase		1.164	2.78e-09	CCL3L3,CD80,CXCL10,IL6,IRF7,ISG15,MARCO,Mx1,OAS1,OAS2,PLA1A,RSAD2,SLFN13,TLR2
phenylephrine		chemical drug		1.165	0.0354	EDNRB,FST,MYH6,RGS4
CHEK2	0.671	kinase		1.188	0.000376	BIRC5,CCNG1,CDKN1A,H2AX
indomethacin		chemical drug		1.194	5.96e-15	ANXA1,BIRC5,CCL2,Ccl2,CCL3L3,CD14,CDKN1A,CLDN4,CSF2RB,CTSD,FCGR2A,GPNMB,HAS2,HMOX1,IL6,ITGAM,LCN2,LGALS3,LPL,MMP12,MMP14,PLA1A,PLIN2,PTGER4,S100A8,SPP1,TIMP1,TNFRSF12A,VCAN
NQO1	-0.062	enzyme		1.195	1.11e-05	BIRC5,Ccl6,Ccl9,CCR1,CCR2,CDKN1A,IL6
EOMES	0.313	transcription regulator		1.195	0.0102	ACTC1,ADM,ANXA1,CEMIP,IGFBP3,KDR,TGFBI
SMAD4	-0.164	transcription regulator		1.209	3.55e-06	AREG,CCL2,Ccl2,CDKN1A,CTSD,EREG,FN1,FST,HAS2,HMOX1,KLF15,MMP13,PLAU,SERPINE1,TBX3,THBS1,TIMP1,TNC
EGFR	0.072	kinase		1.213	4.58e-10	ANXA1,AREG,ARG1,BIRC5,CCL2,CCNA2,CDK1,CDKN1A,COL5A2,COL8A1,CTSK,CXCL10,EREG,F7,HAS2,IGFBP3,IL6,LCN2,MMP13,MMP14,MMP3,PLAU,PTGER4,SERPINA3,SERPINE1,SLC7A11,SOCS3,THBS1,TNC,TNXB,VCAN
sodium arsenite		chemical drug		1.213	0.00985	BIRC5,CDKN1A,HMOX1,OLR1,SOCS3
FOSL2	0.203	transcription regulator		1.225	8.19e-05	Ccl2,CCR2,FOLR2,MMP13,MMP3,SPP1,TIMP1
diclofenac		chemical drug		1.231	0.000435	CDKN1A,CLDN4,IL6,ITGAM,TMEM100
Growth hormone		group		1.233	0.0403	CA3,CYP2E1,FGG,FN1,IGFBP3,LPL,NR1D1,SOCS3,SPP1
INHBA	0.892	growth factor		1.242	2.35e-06	CCL2,CCR2,CDKN1A,EREG,F13A1,FN1,FOLR2,FST,IL6,MAFB,mir-8,NR4A2,S100A8,S100A9,SERPINE1,TIMP1
ALOX15	0.19	enzyme		1.246	0.00389	Ccl2,FN1,HMOX1,IL6
PD 123319		chemical drug		1.249	2e-05	Ccl2,CYBA,KDR,SERPINE1,SPP1,TIMP1
oxazolone		chemical reagent		1.253	0.000138	Ccl2,CXCL10,IL6,KDR,S100A8
eflornithine		chemical drug		1.254	1.11e-05	CDK1,CDKN1A,FN1,ITGAX,LGALS3,PSAP,SERPINE1
methyl methanesulfonate		chemical toxicant		1.264	0.00156	CCNG1,CDKN1A,CTSD,DESI2,GADD45G
SYK	0.279	kinase		1.272	0.000434	CCL2,CXCL10,FCER1G,FST,IL6,ITGAM,LY9,OAS1,OAS2
urethane		chemical toxicant		1.276	2.23e-06	ARG1,CCL3L3,CDKN1A,CYP1A1,CYP2E1,HMOX1,KDR
BCR-ABL1		fusion gene/product		1.285	0.000481	BCL2A1,BIRC5,CCL2,Ccl9,CSF2RB,HMOX1,LCN2,MSR1
clofibrate		chemical drug		1.302	0.000778	APOC2,CDK1,CYP1A1,HMGCS2,HMOX1,IL1RN,IL6,Mt2
CD36	-0.038	transmembrane receptor		1.306	1.08e-07	ADAMTS4,AREG,ARG1,CCL27,IL6,LPL,MMP13,MMP14,MMP3,PLAU,Pln,SERPINE1
arachidonic acid		chemical - endogenous mammalian		1.334	0.000165	BCL2A1,CD80,HMOX1,IL6,KDR,MMP13,PLAU,SPP1,TNFRSF1B
Collagen type IV		complex		1.342	5.13e-05	CCL2,MMP14,PLAU,SERPINE1,THBS1
PDGF-DD		complex		1.342	0.000138	Ccl2,Ccl7,KDR,TNFRSF12A,TUBB6
S100A6	1.199	transporter		1.342	0.000307	CDK1,CDKN3,DEPDC1,DHRS9,PBK
LLGL2	-0.077	other		1.342	0.000512	HEXB,ITGB2,SERPINE1,TNNT2,TOP2A
TLR7/8		group		1.342	0.000929	BCL2A1,CCL2,EREG,RGS1,SLC7A11
RPS6KB1	-0.244	kinase		1.342	0.00106	CDKN1A,CXCL10,IRS1,ISG15,SERPINE1
FGF7	-0.098	growth factor		1.348	0.000128	CDKN1A,FABP5,HAS2,MMP13,PLAU,PTAFR,S100A8,SERPINE1
CAV1	-0.577	transmembrane receptor		1.354	6.54e-05	ADAMTS4,ARG1,CD14,CDKN1A,CTSD,HMOX1,IL6,KDR,MUC5B,SERPINE1,SPRR1A,THBS1
BRCA1	0.422	transcription regulator		1.359	0.000285	APOBEC1,AREG,BIRC5,CCNB2,CCNG1,CDKN1A,CTSD,CYP1A1,H2AX,HMOX1,IRF7,VCAN
mycophenolic acid		chemical drug		1.36	1.19e-06	ADM,CCL2,CD63,CDKN1A,CYBB,FN1,IL6,MMP13,OLR1,RGS4,SERPINE1
ITGB1	0.415	transmembrane receptor		1.36	5.55e-06	CCL2,CCN4,CDKN1A,COL5A2,FN1,IL1RN,IL6,LAMA1,MMP19,PLAU,SERPINE1,THBS1,TNXB
FGF8	-0.01	growth factor		1.369	0.000839	CCL2,FGFR4,MKI67,PCOLCE2,RTKN2,SPP1,THBS1,TNXB
LIN9	0.516	other		1.372	3.85e-05	BIRC5,CCNA2,CDK1,CDKN1A,UBE2C
S-nitroso-N-acetyl-DL-penicillamine		chemical reagent		1.384	2.17e-06	ADM,BIRC5,CCL2,CDKN1A,DDIAS,HMOX1,HSPA1A/HSPA1B,SPP1,TIMP1
EHF	0.143	transcription regulator		1.387	3.3e-09	CDK1,CYP1A1,EREG,HMOX1,IL1RN,IL6,KDR,MMP3,S100A8,S100A9,SERPINA3,SERPINE1,TIMP1,TNC
TNC	3.233	other		1.387	2.57e-06	ADAMTS4,CCL2,Ccl2,CCL3L3,CDKN1A,EREG,IL6,MMP14
CCR6	0.538	G-protein coupled receptor		1.387	0.000156	Ccl2,CCL3L3,CXCL10,MMP12
FGF10	-0.146	growth factor		1.387	0.00145	ANXA1,CTSB,MMP14,MYH6,S100A6,Saa3
U18666A		chemical reagent		1.4	3.98e-06	CTSK,IL6,MMP14,MMP8,S100A8
DETA-NONOate		chemical reagent		1.402	9.41e-05	CDKN1A,HMOX1,IL6,IRF7,S100A8,SERPINE1,TIMP1
GSK3B	-0.016	kinase		1.404	1.33e-06	BCL2A1,BIRC5,CCL2,Ccl2,Ccl7,CDKN1A,H2AX,IL6,KDR,LCN2,MYH6,SERPINE1,SPP1
Fc gamma receptor		group		1.406	0.000209	CCNA2,CDKN1A,IL6,SOCS3,TNIP3
Am 580		chemical reagent		1.406	0.00574	ADM,CYP2E1,FOLR2,PLIN2,TIMP1
estrogen		chemical drug		1.407	2.7e-06	AREG,CCL2,CCNB2,CDKN1A,CTSD,CYBB,F7,FN1,GRIA1,IL6,IRS1,KDR,LCN2,LGALS1,LPL,LTF,PTAFR,SERPINA3,SPP1,TOP2A
superoxide		chemical - endogenous mammalian		1.408	1.28e-06	CYBA,FN1,HMOX1,IL6,TIMP1,TLR8
MAP2K1/2		group		1.41	0.00694	Ccl2,CCL3L3,CDK1,H2AX,HMOX1,RRM1
dorsomorphin		chemical - kinase inhibitor		1.411	0.00014	ARG1,BIRC5,Ccl2,Hamp/Hamp2,IL6,KDR,MUC5B
POSTN	-0.455	other		1.413	0.00138	ADAMTS4,Ccl2,FN1,MMP13,SPP1
enalapril		biologic drug		1.414	1.08e-05	CLDN4,KDR,LCN2,LGALS3,SERPINE1,SPP1,TIMP1,TNFRSF12A
diethylnitrosamine		chemical toxicant		1.42	2.31e-05	Abcb1b,CD63,CDKN1A,CSTB,CYP7B1,HMOX1,IL6,LCN2,LPL,Mt2,TIMP1
PTHLH	-0.114	other		1.431	7.85e-09	Ccl2,CDK1,CDKN1A,CTSK,FN1,HSPA1A/HSPA1B,IL6,MMP13,PLAU,SERPINE1,TGM1,TNC
C/EBP		group		1.432	0.00121	CYP1A1,IL6,LCN2,PTAFR,Saa3
STAT5a/b		group		1.432	0.00143	ARG1,BCL2A1,BMP6,CDKN1A,FCER1G,FCGR1A,PF4,SOCS3,TLR2
RUNX1	-0.065	transcription regulator		1.435	9.66e-07	CD53,CD72,CDKN1A,CSF2RB,FHDC1,IGFBP3,IL7R,IRF7,ISG15,ITGB2,MMP13,MMP8,PF4,PLEK,RSAD2,S100A9,SERPINE1,SPP1,TIMP1
HES1	-0.098	transcription regulator		1.439	0.0021	CDKN1A,CFD,GRIA1,IL6,MMP13,SPP1
TNFRSF1B	1.03	transmembrane receptor		1.442	3.89e-05	CCR5,CXCL13,IL6,MMP13,MMP14,MMP3,MSR1,SERPINE1,SOCS3,TIMP1
JUNB	0.856	transcription regulator		1.443	3.07e-09	C1QB,C3AR1,CCL3L3,Ccl7,CD68,CFD,CXCL16,FN1,HMOX1,IFI16,IL6,LCN2,MMP13,MMP3,PLAU,SERPINE1,TBX3,TIMP1
HSF1	-0.372	transcription regulator		1.444	0.00171	Abcb1b,Abi3bp,CCNA2,CDK1,HMOX1,HSPA1A/HSPA1B,IL6,IL7R,LPL,MMP19,PDZD2,VCAN
STAT5A	0.116	transcription regulator		1.446	8.28e-07	BCL2A1,C15orf48,Ccl2,CCL3L3,CCR5,CD68,CDKN1A,CEMIP,FCER1G,GADD45G,H1-2,IL6,IL7R,LCN2,NR4A2,OAS1,OLR1,SERPINA3,SLC7A8,SOCS3,TGFBI
THBS1	1.511	other		1.446	2.53e-05	Ccl2,FN1,IL6,PLAU,THBS1,TIMP1
DDIT3	-0.104	transcription regulator		1.446	0.0357	FN1,HMOX1,IL6,ITGAM,LCN2,RGS4
ECSIT	-0.068	transcription regulator		1.455	0.000209	HMOX1,IL1RN,IL6,IRF7,NR4A2
paclitaxel		chemical drug		1.456	2.03e-07	ADGRE1,AREG,BIRC5,CCL2,CCNG1,CD53,CD80,CDKN1A,CXCL10,CYP1A1,CYP2E1,EREG,FMO3,H2AX,HPSE,IGFBP3,IL6,LILRB4,MKI67,PLAU,S100A9,THBS1
ADORA2B	0.234	G-protein coupled receptor		1.457	3.15e-07	ARG1,Ccl2,IL6,MMP12,PDE5A,SERPINE1,SPP1,TIMP1
3-methylcholanthrene		chemical toxicant		1.459	2.78e-05	Abcb1b,ADM,CTSD,CYP1A1,Mt2,Orm1 (includes others),SLC7A11
LG100268		chemical reagent		1.461	0.000807	Ccl6,Ccl9,CYP7B1,LPL,PLIN2
TBX2	-0.688	transcription regulator		1.463	0.00163	ANLN,CCNA2,CDK1,CDKN1A,CKAP2,NCAPG2,PRC1
Mapk		group		1.471	4.08e-06	CCL2,CDKN1A,CLDN4,CYBB,HMOX1,IL6,IRS1,MMP13,MMP3,S100A8,SPP1
IKBKE	0.607	kinase		1.473	5.8e-05	Ccl2,CCL3L3,CXCL10,IFI16,IL6,IRF7,MMP13,MMP3,RSAD2
NFATC1	-0.008	transcription regulator		1.475	0.0188	Acp5,CTSK,CYBB,CYP1A1,IL6,SPP1
EBF1	-0.841	transcription regulator		1.484	0.0292	Ccl9,CXCL10,IL6,IRF7,IRS1,SOCS3,TLR2
NOTCH3	-0.182	transcription regulator		1.485	0.00132	BIRC5,CDKN1A,FN1,KDR,MSR1,RGS5
PIK3CG	0.844	kinase		1.496	2.85e-09	Acp5,ARG1,ATP6V0D2,BCL2A1,Ccl2,CTSK,CXCL10,FCGR3A/FCGR3B,HMOX1,IL6,MMP3,OAS2,TLR2,TLR8,ZBP1
prostaglandin E2		chemical - endogenous mammalian		1.497	6e-15	AREG,ARG1,BIRC5,CCL2,Ccl2,CCL3L3,CCR1,CCR5,CD14,CD80,CDKN1A,CXCL10,EREG,FN1,FST,HAS2,HMOX1,IL1RN,IL6,IL7R,ITGAM,MAFB,MMP13,MMP14,MMP19,MMP3,NR4A2,PLAU,PTGER4,S100A8,SOCS3,SPP1,THBS1
FCGR2A	1.657	transmembrane receptor		1.498	0.000171	CCL2,Ccl2,FCGR3A/FCGR3B,IL6,SERPINE1
IL12B	0.2	cytokine		1.501	8.19e-05	Ccl2,CCR5,CXCL10,IL6,S100A8,S100A9,SOCS3
NR1I2	-0.099	ligand-dependent nuclear receptor		1.51	0.00131	Abcb1b,APOC2,CDKN1A,CYP1A1,GUSB,Hamp/Hamp2,HMGCS2,IL6,LCN2,S100A8
PIK3R2	0.003	kinase		1.513	3.98e-06	CXCL10,IRF7,ISG15,MKI67,PLAU
brefeldin A		chemical - endogenous non-mammalian		1.513	0.000703	GRIA1,HMOX1,LPL,MMP3,THBS1,TIMP1
ribavirin		chemical drug		1.516	1.81e-08	CCL3L3,CD80,F7,IL6,IRF7,ISG15,ITGAM,ITGB2,RSAD2
TNFSF10	-0.384	cytokine		1.532	2.59e-07	BIRC5,CD14,CTSB,IFI16,IL1RN,IL6,ISG15,ITGAM,MMP3,PLAU,TIMP1,Tnfrsf22/Tnfrsf23
ZEB1	-0.378	transcription regulator		1.536	0.00109	Abcb1b,CCR2,FN1,mir-8,OAS1,PLAU,SERPINE1
MITF	0.673	transcription regulator		1.542	6.13e-05	Acp5,CTSK,ECT2,EDNRB,FN1,GPNMB,HPGDS,LGALS3,MMP14,NUF2,PLA1A,SEMA6A,SERPINE1,SLC7A8,TPX2,UBE2C
WT1	-0.074	transcription regulator		1.544	2.58e-06	AREG,BCL2A1,CCL2,CDKN1A,CTSV,CXCL10,EREG,GSN,ITGAM,LGALS3,MMP13,MMP14,MMP3,NR4A2,Serpinb9b,SERPINE1,THBS1,TYROBP
SPIB	-0.222	transcription regulator		1.554	7.91e-07	BMP6,CCR2,CCR5,CD300C,CD80,CLEC10A,HSPA1A/HSPA1B,KDR,LILRB3,P2RY6,SLAMF9
Ins1	0.01	other		1.557	1.68e-06	Abcb1b,ATP1A2,CDKN1A,CFD,CNN1,CYP1A1,CYP2E1,IGFBP3,IL6,IRS1,LGALS12,LPL,MMP13,MMP3,PLIN2,PTPRN,RRM1,Saa3,SERPINE1,SOCS3,TIMP1
NADPH oxidase		complex		1.561	5.2e-06	CCL2,CYBB,HMOX1,IL6,MMP12,SERPINE1
NLRP3	0.504	other		1.561	5.8e-05	Ccl2,CCL3L3,CCR5,CXCL10,FN1,H2AX,HMOX1,IL6,MSR1
ERG	-0.369	transcription regulator		1.572	0.000612	CCNA2,DIAPH3,GUCY1A1,mir-8,MMP3,MYO5A,NR4A2,NRCAM,PLA1A,PLAU,PLEK,SPP1,THBS1
NGF	0.371	growth factor		1.575	0.0147	ADM,AKR1B10,CD80,CDK1,CDKN1A,GUCY1A1,HMOX1,MMP3,RGS4,TNFRSF12A
TCF4	-0.155	transcription regulator		1.58	8.14e-06	BEX3,BIRC5,CCNA2,CCNB2,CDK1,CDKN1A,CDKN3,CIP2A,FN1,IFI16,IGFBP3,IRS1,MKI67,MMP13,NDC80,NUF2,PLAU,PRC1,RACGAP1,SLAMF7,SOCS3,SPP1,VCAN,ZBP1
sphingosine-1-phosphate		chemical - endogenous mammalian		1.587	1.36e-06	CCL2,Ccl2,CXCL10,FN1,HAS2,IL6,KDR,MMP14,SERPINE1,THBS1,TIMP1
ionomycin		chemical reagent		1.59	0.00195	BCL2A1,CLDN4,CXCL10,FCGR1A,HPSE,IL6,ITGB2,NR4A2,PTAFR,SPP1,TLR2
CCL2	1.909	cytokine		1.606	2.34e-09	BIRC5,CCL2,Ccl2,CCR2,CD80,CXCL10,FOLR2,IL6,LCN2,LPL,MKI67,SERPINE1,SLC11A1,TIMP1
methylprednisolone		chemical drug		1.609	3.5e-09	ANXA1,ARG1,B4GALT6,C1QB,Ccl2,CCNG1,CDKN1A,CTSS,CTSV,CYBB,CYP4F8,DHRS9,EDNRB,FABP5,FCGR2A,FN1,GATM,GDA,HMOX1,HSPA1A/HSPA1B,IGSF6,IL1RN,IL6,IRF7,KLF15,LIPA,LPL,MAFB,PLA1A,PLAU,PLIN2,SERPINA3,SERPINE1,TLR2,TOP2A
forskolin		chemical toxicant		1.613	6.76e-13	ADAMTS4,ADM,AKR1B10,AREG,BIRC5,CCL2,Ccl9,CCNB2,CD14,CD68,CD80,CDKN1A,CDKN3,CNN1,CTSV,CXCL10,CXCL13,EREG,FN1,FST,GADD45G,GRIA1,GTSE1,HAS2,HHIP,HMOX1,HSPA1A/HSPA1B,IGFBP3,IL6,LGALS12,LTF,MMP19,MMP3,Mt2,NR4A2,PLAU,PTPRN,RGS4,RGS5,RRM1,S100A8,SERPINE1,SLC7A11,SLC7A8,SPP1,THBS1,TIMP1,VCAN
BSG	0.261	transporter		1.62	6.15e-05	CCL3L3,CIP2A,IL6,KDR,MMP3,PLAU,SERPINE1
PTGES	0.775	enzyme		1.622	3.02e-06	ANXA1,BIRC5,Ccl2,CDKN1A,CYBA,CYBB,IL6,MYH6,SERPINE1
daidzein		chemical drug		1.625	0.000165	ARG1,CCL2,CYP1A1,FCGR2B,HMOX1,IL6,IRF7,ITGB2,LY86
MSTN	-0.005	growth factor		1.627	1.16e-06	Acp5,CDKN1A,CTSK,CTSV,FN1,IGFBP3,IL6,MYO5A,SPP1,TNC
IL17R		complex		1.633	5.36e-08	CCL2,CXCL10,MMP13,S100A8,S100A9,TIMP1
TGFA	-0.337	growth factor		1.633	9.26e-08	AREG,BIRC5,CCL2,CDKN1A,CXCL10,EREG,IL6,ITGAM,LCN2,MMP13,NR4A2,SERPINE1
triclosan		chemical drug		1.633	1.28e-06	AREG,CYBB,HMOX1,IL6,PLAU,TIMP1
fatty acid		chemical - endogenous mammalian		1.633	1.07e-05	Ccl2,CYP2E1,HMOX1,IL6,IRS1,ITGAM,LPL,NR4A2,PLIN2,S100A8,SERPINE1
ROR1	-0.055	kinase		1.633	7.03e-05	HEXB,ITGB2,SERPINE1,THBS1,TNNT2,TOP2A
Cdc42	0.258	enzyme		1.633	0.000119	Ccl2,CTSB,CTSD,CTSS,CTSV,CTSZ
NSUN6	-0.362	enzyme		1.633	0.000191	HEXB,ITGB2,SERPINE1,THBS1,TNNT2,TOP2A
zymosan		chemical - endogenous non-mammalian		1.641	2.3e-05	Ccl2,CCL3L3,HMOX1,IL6,ITGAM,LPL,SOCS3,TLR2
KITLG	-0.725	growth factor		1.655	7.01e-07	ALOX5AP,BIRC5,CCL2,Ccl2,CCL3L3,CCNA2,CD14,CD68,CDKN1A,EDNRB,FABP5,HMOX1,Ifi27l2a/Ifi27l2b,IGFBP3,IL1RN,IL6,KDR,LTF,MARCO,PF4
REL	0.126	transcription regulator		1.655	0.000376	ANLN,BCL2A1,BIRC5,CCL2,CD80,CDKN1A,COTL1,CTSV,CXCL10,FN1,IL6,KDR,RSAD2,Tnfrsf22/Tnfrsf23
LTA	0.019	cytokine		1.663	0.00853	Ccl2,CXCL13,HAS2,IL6
Fibrinogen		complex		1.664	2.26e-09	CCL2,Ccl2,CCL3L3,FCGR3A/FCGR3B,IL6,ITGAM,MMP14,TLR2
SELP	0.981	transmembrane receptor		1.664	3.9e-05	BCL2A1,BST1,CCL2,CCL3L3,CDKN1A,IL6
mir-24	-0.181	microRNA		1.664	0.0016	CDKN1A,FN1,IL6,KDR,PSAP,SERPINE1
GnRH-A		chemical reagent		1.664	0.00496	AKR1B10,CD53,CD68,CDKN1A,FST,SERPINE1
L-glutamic acid		chemical - endogenous mammalian		1.664	0.0281	Ccl2,CDKN1A,CFD,HEXA,PLIN2,TIMP1
LEF1	-0.352	transcription regulator		1.665	0.000121	BIRC5,CDK1,CDKN1A,FN1,GNAO1,HAS2,IL7R,KIF11,MMP13,NRCAM,Prg4,SPP1
HIC1	0.178	transcription regulator		1.673	0.000317	CDKN1A,CYP7B1,FST,LCN2,MMP12,SLC7A11,SPP1
IRF8	0.558	transcription regulator		1.681	2.17e-09	ADGRE1,Ccl9,CCR2,CD14,CD80,CDKN1A,CFB,CTSS,CXCL16,CYBB,IL6,ISG15,ITGAM,MAFB,MSR1,OAS1,TYROBP
IFNGR1	0.252	transmembrane receptor		1.695	0.000929	Ccl2,CCL3L3,CXCL10,IL6,IRF7
RARA	-0.325	ligand-dependent nuclear receptor		1.698	2.22e-06	BIRC5,CCNA2,CD14,CD53,CD84,CDK1,CDKN1A,CDKN3,CTSS,FGFR4,FOLR2,IL6,KNL1,LGALS1,LTF,MAFB,OAS1,PBK,PRDM8,RSAD2,Saa3,SLC7A11,SPP1
MAP3K14	0.115	kinase		1.698	0.00496	ADGRE1,BST1,Ccl2,CCL27,IL6,IL7R
kainic acid		chemical toxicant		1.701	0.0017	Abcb1b,Ccl2,CCL3L3,GRIA1,KDR,LCN2,NR4A2,RGS4,SPP1,TIMP1
PIN1	-0.54	enzyme		1.706	0.000641	BCL2A1,CDKN1A,DEPDC1,FN1,IL6,MMP3,TIMP1
CDK1	1.374	kinase		1.718	0.000483	BIRC5,CDK1,CDKN1A,H2AX
CEBPD	0.324	transcription regulator		1.725	1.05e-15	ALOX5AP,BCL2A1,BIRC5,Ccl2,CCL3L3,CCNB2,CD14,CDKN1A,CTSV,CYP1A1,CYP2E1,IL6,ITGAM,ITGAX,MMP13,MMP3,MMP8,PTAFR,Saa3,SLC5A12,TLR8
IL12 (complex)		complex		1.726	2.04e-08	ADGRE1,CCL2,Ccl2,CCR2,CCR5,CD63,CXCL10,GADD45G,IL6,IL7R,ISG15,ITGB2,MARCO,mir-8,Mx1,PLAU,SOCS3,TIMP1,TLR2
INHBB	0.373	growth factor		1.732	5.1e-07	FST,Hamp/Hamp2,MMP3,SERPINE1,THBS1,TIMP1,TNC
PPIF	0.006	enzyme		1.732	1.5e-06	BMP6,CCL2,Ccl2,Ccl6,Ccl7,Ccl9,CCR1,CCR2,CCR5,CXCL10,IL6,PF4
CCN3	-0.588	growth factor		1.732	0.000931	CCL2,GREM1,PDGFC,SERPINE1
XIAP	-0.193	enzyme		1.732	0.00113	BIRC5,CDKN1A,IL6,SERPINE1
MAP2K4	0.17	kinase		1.741	0.0012	BIRC5,CDKN1A,CXCL10,IL6,MUC5B,PLAU
RAC1	-0.036	enzyme		1.744	0.0064	Ccl2,FN1,GSN,HMOX1,IL6,MMP13,MMP14
CD40LG	-0.049	cytokine		1.745	9.52e-06	BCL2A1,CCL2,CCNG1,CCR1,CCR2,CCR5,CD63,CD80,CDKN1A,CXCL10,FCGR2B,HSPA1A/HSPA1B,IL6,IL7R,ISG15,ITGAM,MMP14,PLAU,PLEK,RGS1,SERPINE1,TREM2
FLT3LG	-0.759	cytokine		1.746	0.00249	BIRC5,CCR5,CD80,CYBB,IL7R,ITGAM
mir-15	-0.414	microRNA		1.751	6.52e-05	BIRC5,CCL2,Ccl2,HSPA1A/HSPA1B,IL6,ISG15,OAS1,TIMP1
Ccl2	2.351	cytokine		1.759	4.22e-14	Ccl2,CCL3L3,Ccl7,Ccl9,CCR2,CD14,CFD,CTSB,CTSK,CTSV,CXCL10,IL6,KDR,LPL,TBX3
3M-002		chemical reagent		1.766	2.35e-12	Abi3bp,ACTC1,BCL2A1,CCL3L3,Ccl9,CLEC4E,CXCL10,FCGR1A,GPNMB,IL6,IRF7,ITGAX,MARCO,PHF11,RGS4,Saa3,SLFN12L,Tlr13,TLR8,ZNF616
Pdgf Ab		complex		1.772	4.55e-08	AREG,BIRC5,COL8A1,EREG,GRIA1,HMOX1,IL6
ATP		chemical - endogenous mammalian		1.779	6.94e-10	ARG1,BIRC5,Ccl2,CCR5,CD14,CXCL10,H2AX,IL1RN,IL6,ITGAM,LCN2,MMP13,MMP3,SERPINE1,THBS1,TNFRSF1B
CCL11	-0.036	cytokine		1.782	1.07e-06	BIRC5,BMP6,CCL2,CCL27,CCL3L3,CCR2,IL6,ITGAM,MMP3
CD3		complex		1.784	4.4e-06	ANXA1,BCL2A1,BIRC5,CCL3L3,CCR1,CCR2,CCR5,CD53,CD80,CDK1,CH25H,CXCL10,CYBA,FCER1G,FMO3,HMCN1,HSPA1A/HSPA1B,IL6,IL7R,MSR1,NAIP,PLEK,PLIN2,PSAP,PTGER4,SOCS3,TFEC,THBS1,TLR2,TNFSF18,TOP2A
PGR	-0.451	ligand-dependent nuclear receptor		1.785	0.00767	AREG,CCNB2,CDK1,CDKN1A,CTSD,FN1,IRS1,PLAU,S100A6,S100A8,TGFBI,TNC,VCAN
CCND1	0.663	transcription regulator		1.786	0.000277	AREG,BIRC5,CCNA2,CDKN1A,CIP2A,COL5A2,DDIAS,DEPDC1,EREG,GAS2L3,HSPA1A/HSPA1B,KIF11,KNL1,MMP3,RACGAP1,RPL10,SPP1,TPX2
E2F1	0.349	transcription regulator		1.817	0.00325	BIRC5,CCNA2,CCNB2,CDK1,CDKN1A,CTSB,ECT2,FHDC1,INMT,IRS1,KDR,MMP3,NDC80,NUSAP1,RACGAP1,RRM1,SERPINE1,TGM1,THBS1,TOP2A
PIK3R1	-0.149	kinase		1.819	0.000442	CXCL10,HMOX1,IL6,IRF7,ISG15,MKI67,PLAU,SERPINE1
Tgf beta		group		1.821	3.64e-14	Acp5,CCL2,Ccl2,CCL3L3,CCR2,CDKN1A,CTSK,CXCL10,FGG,FN1,FST,GREM1,GUSB,HMOX1,IGFBP3,IL1RN,IL6,MMP13,MMP14,MMP3,NR4A2,PLAU,SERPINE1,SLFN12L,SOCS3,SPP1,TGFBI,THBS1,TIMP1,TLR2,TNFRSF12A
CpG ODN 2006		chemical reagent		1.843	9.82e-06	CCL2,CD80,CXCL10,IL6,IRF7,OAS1,RSAD2,TLR7,TNFSF18
RHOA	0.125	enzyme		1.845	8.66e-05	ANLN,CDKN1A,CTSD,ECT2,FN1,IL6,MMP13,MMP14,PLAU
TREM1	0.456	transmembrane receptor		1.848	4.22e-10	AREG,Ccl2,CD14,CDK1,CFB,CXCL10,GREM1,IL6,ISG15,ITGAX,LPL,LY9,MMP19,NR4A2,RGS1,SLAMF7,SPP1,TCEAL9,THBS1,TLR2,TNIP3
Pdgf (complex)		complex		1.873	4.08e-06	CCL2,Ccl2,CDKN1A,CYBA,FN1,GRIA1,HMOX1,NR4A2,PLAU,SERPINE1,TIMP1
progesterone		chemical - endogenous mammalian		1.881	4.72e-12	ADM,AREG,ATP1A2,CA3,CCL2,CCNA2,CCNB2,CCNG1,CCR2,CCR5,CDKN1A,CFB,CFD,CLDN4,CNDP2,CTSV,CXCL10,CYP1A1,CYP2E1,FN1,FST,GRIA1,IGFBP3,IL6,INMT,IRS1,KDR,LCN2,LGALS1,LGALS3,LPL,LTF,mir-8,MKI67,MMP13,MMP3,PLA2G7,PTGER4,S100A6,SPP1,TGFBI,TGM1,TIMP1,TNXB
IRAK1	0.305	kinase		1.885	0.00695	CCL2,CXCL10,CXCL16,IL6
AGTR1	-0.408	G-protein coupled receptor		1.886	0.000222	CYBA,FN1,HMOX1,IL6,OLR1,SERPINE1
TGFB2	0.358	growth factor		1.887	4.39e-06	CNN1,FN1,HAS2,HMOX1,KDR,PTAFR,S100A8,SERPINE1,SPP1,THBS1,TIMP1,VCAN
ursodeoxycholic acid		chemical - endogenous mammalian		1.89	5.78e-05	Ccl2,CXCL10,CYP1A1,CYP2E1,IRS1,LGALS3,SPP1,TIMP1
methylmercury		chemical toxicant		1.89	0.000641	CCNG1,CD63,CYP1A1,CYP2E1,HMOX1,IGFBP3,IL6
Nfat (family)		group		1.89	0.00105	CCL2,CCL3L3,CTSK,CYBB,DHRS9,GRIA1,SERPINE1,TNNT2
CNR1	-0.263	G-protein coupled receptor		1.912	2.37e-05	BIRC5,Ccl2,CCNB2,CDK1,CXCL10,CYP7B1,IL6,KIF11,LAMA1,MMP13,PLAU,S100A6,TIMP1
ATM	0.013	kinase		1.92	5.78e-05	CDKN1A,FN1,GADD45G,H2AX,HMOX1,IL6,RRM1,SERPINE1
BMP2	-0.563	growth factor		1.92	0.00143	CDKN1A,CTSK,FN1,FST,GREM1,Hamp/Hamp2,HAS2,IFI16,MMP13,SPP1,TIMP1,VCAN
CCL5	0.181	cytokine		1.932	3.65e-06	CCL2,Ccl2,CCL3L3,CCR1,CCR5,IL6,ITGAM,MMP19,OLR1,THBS1
KDM3A	-0.172	transcription regulator		1.937	1.35e-05	ADM,CCL2,HMOX1,MMP12,SERPINE1,TNC,TNXB
RET	-0.083	kinase		1.938	8.67e-07	ANXA1,CCL2,Ccl2,CTSB,CTSV,EDNRB,HSPA1A/HSPA1B,IL6,MMP14,MMP3,PLAU,REEP6,S100A9
KDM6B	-0.672	enzyme		1.94	0.00389	CCL3L3,Ccl9,FN1,IL6
PLAUR	0.563	transmembrane receptor		1.941	1.37e-06	CCL2,Ccl2,CTSB,CYBB,ITGAM,KDR,MMP3,PLAU
RIPK1	0.295	kinase		1.941	1.63e-05	ARG1,BIRC5,CCL2,CCL3L3,CXCL10,IL6,MMP12
JAK1	0.219	kinase		1.941	5.78e-05	CCL2,CCL3L3,CD14,CDKN1A,IRF7,LRG1,Orm1 (includes others),SOCS3
vinblastine		chemical drug		1.941	0.000209	CCNG1,CD80,CDKN1A,CYP1A1,IL6
KAT2B	-0.052	transcription regulator		1.941	0.0022	CCL2,CD80,CDKN1A,ISG15,ITGAM
TSLP	0.35	cytokine		1.945	0.000435	CD63,CD80,IL6,MKI67,TIMP1
PTPN3	-0.035	phosphatase		1.945	0.00136	CDKN1A,FN1,SERPINE1,TGFBI
cholecalciferol		chemical - endogenous mammalian		1.947	2.02e-13	Acp5,BIRC5,CCL2,CD14,CD80,CTSK,CXCL10,F13A1,FAM20C,IGFBP3,ITGAM,ITGAX,ITGB2,MCEMP1,MS4A6A,MYH6,PLD4,RGS1,SERPINE1,SPP1
S-(2,3-bispalmitoyloxypropyl)-cysteine-GDPKHPKSF		chemical reagent		1.948	0.00061	CCL2,CD80,CXCL10,IL6
FZD8	-0.485	G-protein coupled receptor		1.951	0.00061	BIRC5,FN1,MYH6,VCAN
HEY1	-0.11	transcription regulator		1.951	0.00161	CDKN1A,CNN1,KDR,MYH6
STAT		group		1.951	0.00497	CDKN1A,SERPINA3,SOCS3,TIMP1
FASLG	-0.16	cytokine		1.951	0.00939	BIRC5,CCL2,CXCL10,IL6
22(R)-hydroxycholesterol		chemical - endogenous mammalian		1.953	0.00497	APOC2,CH25H,HAS2,LPL
laquinimod		chemical drug		1.954	3.29e-05	Aox3,CCR1,CYP1A1,DPEP2,GPNMB,MMP13,MMP8,MS4A7,MSR1,SLC7A11,SLFN12L
IL9	-0.146	cytokine		1.954	0.00559	CCL2,Ccl2,CCL3L3,Ccl7
ETV4	0.076	transcription regulator		1.954	0.00559	FN1,HPSE,MMP14,SPP1
zymosan A		chemical - endogenous non-mammalian		1.96	0.00061	ANXA1,Ccl2,CD80,IL6
Klra7 (includes others)	-0.55	transmembrane receptor		1.96	0.00061	CCL3L3,Ccl6,GPR65,TYROBP
CpG ODN 2216		chemical reagent		1.96	0.000758	CD80,IL6,IRF7,TNFSF18
nocodazole		chemical reagent		1.96	0.103	CDK1,CDKN1A,CDKN3,PF4
2,4-dinitrofluorobenzene		chemical toxicant		1.961	0.00136	ARG1,Ccl2,CCL3L3,CXCL10
PRKCI	-0.14	kinase		1.961	0.00389	CLDN4,ECT2,HMOX1,IL6
ELF3	0.221	transcription regulator		1.961	0.00389	FN1,IL6,MMP13,MMP3
NAMPT	0.653	cytokine		1.962	0.0123	CXCL10,FN1,IL6,MMP3
ssRNA40		chemical reagent		1.964	0.00061	CD80,IL6,SOCS3,TLR8
deoxycorticosterone acetate		chemical drug		1.964	0.00136	CD68,CYBA,SPP1,TNC
TLR8	1.32	transmembrane receptor		1.964	0.0019	CCL2,Ccl2,CXCL10,IL6
DKK1	-0.012	growth factor		1.964	0.00293	BIRC5,BMP6,CDKN1A,MYH6,TBX3,TNNT2
acetaminophen		chemical drug		1.965	1.72e-08	CA3,Ccl2,CCL3L3,CCNG1,CCR1,CCR2,CDKN1A,CTSV,CXCL10,CYP2E1,HMGCS2,HMOX1,IGFBP3,IL6,IRS1,KDR,mir-297,SOCS3
IRAK4	0.635	kinase		1.965	0.000128	Ccl2,CD80,CXCL10,CXCL16,IL6,IRF7,MARCO,OLR1
Raf		group		1.966	0.000479	AREG,B4GALT6,CDKN1A,HAS2,IFI16,SEMA6A,TOP2A
4-methylnitrosoamino-1-(3-pyridinyl)-1-butanone		chemical toxicant		1.966	0.00771	ANXA1,CDKN1A,IL6,SPP1
FOXL2	0.12	transcription regulator		1.966	0.0396	BCL2A1,CCL3L3,CH25H,FST
Ifn gamma		complex		1.967	5.8e-05	CCL2,Ccl2,CDKN1A,CXCL10,CXCL16,CYBB,FN1,LAMA1,SOCS3
IL1RL2	0.644	transmembrane receptor		1.969	0.00011	CXCL10,IL6,MMP3,S100A8
PLCE1	-0.379	enzyme		1.969	0.000156	CCL2,Ccl2,CCR2,IL6
IFNL4		cytokine		1.97	4.83e-05	CXCL10,ISG15,OAS1,OAS2
okadaic acid		chemical toxicant		1.97	0.000523	ANXA1,CDK1,CYBB,IL1RN,IL6,IRS1,MMP3,SPP1
PLP1	-0.362	other		1.97	0.00695	CCL2,Ccl2,MMP3,TIMP1
IL17C	0.105	cytokine		1.972	0.00113	IL6,LCN2,S100A8,S100A9
CCR1	2.023	G-protein coupled receptor		1.976	7.45e-11	Acp5,ATP6V0D2,Ccl2,CCL3L3,CCR1,CTSK,CTSS,CTSV,ITGAM,SPP1
galactosylceramide-alpha		chemical reagent		1.977	0.0198	CCL2,Ccl2,IL6,LGALS3
TP53	-0.046	transcription regulator		1.98	4.77e-14	Abcb1b,ACSS1,ADRA1A,ANLN,ANXA1,APOBEC1,AREG,ARG1,BCL2A1,BIRC5,C1QC,CCL2,Ccl2,CCL3L3,CCNA2,CCNB2,CCNG1,CDK1,CDKN1A,CDKN3,CKAP2,CNN1,COL5A2,CSTB,CTSB,CTSD,CTSK,CXCL10,CYP1A1,DDIAS,DHRS9,EDA2R,FABP5,FMO1,FN1,GADD45G,GATM,GDA,GLRX,GSN,GTSE1,H2AX,HAS2,HMOX1,HSPA1A/HSPA1B,IFI16,IFI30,IGFBP3,IL1RN,IL6,INMT,IRF7,IRS1,ISG15,KDR,LGALS3,LIPF,MAFB,mir-8,MKI67,MMP13,MMP3,MSRB1,Mt2,Mx1,MYO5A,NDC80,NUSAP1,OAS1,…
TNFRSF12A	1.067	transmembrane receptor		1.98	1.43e-05	CCL2,Ccl2,CXCL10,IL6,MMP3
VIPR1	-0.219	G-protein coupled receptor		1.98	0.000287	Ccl2,CCL3L3,CD80,CXCL10
TEK	-0.73	kinase		1.98	0.000376	CDKN1A,IL6,S100A8,S100A9
SOST	0.127	other		1.98	0.000599	Ccl2,CCL3L3,CTSK,LPL,PLIN2
TFPI2	0.692	other		1.98	0.000931	ADAMTS4,AREG,CXCL10,IL6
Ikb		group		1.98	0.0019	CCL2,CFB,IL6,MMP13
SRC (family)		group		1.98	0.00403	CCL2,Ccl2,CYP1A1,FN1,IL6
Cdk		group		1.98	0.00497	CCL2,CXCL10,GADD45G,IL6
dihydrotestosterone		chemical - endogenous mammalian		1.982	8.7e-06	Acp5,ADM,AREG,ARG1,CA3,CCNA2,CD63,CDKN1A,COL5A2,CYBB,DDIAS,DEPDC1,FN1,FST,GSN,HPGDS,HSPA1A/HSPA1B,IGFBP3,IL6,IRS1,LGALS1,LPL,MMP13,MMP3,PLAU,PTGER4,SLC7A8,SPP1,THBS1,VCAN
IFNL2		other		1.982	4.83e-05	CCR5,CXCL10,IRF7,RSAD2
STAT1/3/5 dimer		complex		1.982	7.45e-05	MMP13,MMP3,PLAU,SOCS3
ORAI1	-0.096	ion channel		1.982	0.000376	Acp5,ATP6V0D2,CTSK,IL6
Zn2+		chemical - endogenous mammalian		1.982	0.000483	MMP12,MMP13,MMP3,Mt2
LIN28A	0.136	other		1.982	0.00113	CDK1,CDKN1A,COL5A2,H2AX
taurocholic acid		chemical - endogenous mammalian		1.982	0.00258	CCL2,Ccl2,IL6,KDR
BAK1	0.432	other		1.982	0.00441	CXCL10,IL6,IRF7,Mx1
AIP	0.195	transcription regulator		1.982	0.00442	BIRC5,C3AR1,CYP1A1,PDE8B,RGS4
IL23		complex		1.982	0.0123	CCR2,IL6,S100A8,TLR2
17-alpha-ethinylestradiol		chemical drug		1.984	3.29e-14	Abcb1b,ADGRE1,APOC2,C1QB,C1QC,Ccl2,CCL3L3,CCR1,CCR2,CCR5,CD53,CD68,CDK1,CDKN1A,CTSS,CXCL10,CYP7B1,H2AX,IFI16,IFI30,LCN2,LY86,MARCO,SLC11A1
STAT2	0.309	transcription regulator		1.985	9.15e-09	Ccl2,CXCL10,IL6,IRF7,ISG15,Mx1,OAS1,OAS2,RSAD2,SOCS3,ZBP1
CASR	-0.082	G-protein coupled receptor		1.99	6.57e-09	ANLN,BIRC5,CXCL10,GADD45G,IGFBP3,ISG15,KIF11,LGALS1,LPL,NUSAP1,PRC1,S100A8,S100A9,SOCS3,TLR2,TMEM100,TPX2
RAS		group		1.997	1.99e-06	CCL2,CDKN1A,CLDN4,CXCL10,FN1,HMOX1,IL6,mir-8,MMP13,MUC5B,PLAU,SERPINE1,Tnfrsf22/Tnfrsf23
Stat3-Stat3		complex		1.997	0.00441	CDKN1A,FGG,SERPINA3,SOCS3
poly-L-lysine		chemical reagent	Activated	2	3.71e-06	CCL2,IL1RN,IL6,ITGAM
JAK		group	Activated	2	2.34e-05	CCL2,CXCL10,IL6,ISG15,PTGER4,RSAD2,SOCS3
enterolactone		chemical - endogenous mammalian	Activated	2	2.95e-05	IL1RN,KDR,MKI67,SPP1
CXCL1		cytokine	Activated	2	0.00011	Ccl2,CLEC6A,IL6,SOCS3
VGLL3	0.427	other	Activated	2	0.00011	ADM,MMP3,SPP1,THBS1
NFAT (complex)		complex	Activated	2	0.000138	CCL2,CD68,IL6,SERPINE1,SPP1
BTC	-0.005	growth factor	Activated	2	0.000214	EREG,HAS2,IL6,ITGAM
GNAI3	0.346	enzyme	Activated	2	0.000287	CCL2,CCL3L3,IL6,SPP1
CLEC4E	1.747	other	Activated	2	0.000287	AREG,CCL3L3,CLEC5A,IL6
PPP2CA	-0.269	phosphatase	Activated	2	0.000436	Ccl2,CDKN1A,CFB,CXCL10,IRF7,Saa3
3-deoxy-2-octulosonic acid(2)-lipid A		chemical - endogenous non-mammalian	Activated	2	0.000483	Ccl2,CH25H,CXCL10,IL6
3M-011		chemical reagent	Activated	2	0.000483	CD80,CXCL10,IL6,ISG15
cyclooxygenase		group	Activated	2	0.00061	ARG1,HMOX1,IL6,MMP3
Saa3	3.238	other	Activated	2	0.0019	MMP13,MMP3,S100A8,S100A9
PTGS1	0.91	enzyme	Activated	2	0.00197	ARG1,Ccl2,CYBB,IL6,PTGER4
KDR	-1.128	kinase	Activated	2	0.0022	Ccl2,HMOX1,KDR,MMP14,NDC80
CFB	1.819	peptidase	Activated	2	0.00298	ACTC1,C3AR1,ITGAM,MYH6
aldesleukin		biologic drug	Activated	2	0.00441	FCGR2A,FCGR2B,FCGR3A/FCGR3B,IFI30
EWSR1		other	Activated	2	0.00624	CDK1,NUSAP1,PBK,TOP2A
MAPK3	-0.189	kinase	Activated	2	0.00694	CDKN1A,FN1,IL6,SPP1,THBS1,TIMP1
ATF2	-0.208	transcription regulator	Activated	2	0.00943	BCL2A1,CCNA2,FN1,IL6,MMP13,PLAU
PAF1	-0.115	other	Activated	2	0.0103	CCL3L3,ISG15,OAS2,SERPINE1
methapyrilene		chemical drug	Activated	2	0.0243	CCNG1,CTSB,CTSS,CTSV,HMGCS2,HMOX1,KYNU
CYP1B1	0.24	enzyme	Activated	2	0.0278	HMOX1,Ifi27l2a/Ifi27l2b,MARCO,Mt2
GDNF	0.036	growth factor	Activated	2	0.0539	CTSB,FN1,LGALS1,MMP13
ANXA7	0.226	ion channel	Activated	2	0.0619	CTSB,FST,ITGAM,TNFRSF1B
Collagen type I (complex)		complex	Activated	2.008	1.23e-07	F13A1,FN1,IL6,KDR,LIPF,MMP12,MMP13,MMP14,MMP3,PLAU,TNC
MAFB	1.394	transcription regulator	Activated	2.012	7.11e-05	ADGRE1,AKR1B10,CCL2,F13A1,GATM,IL7R,LGMN,MAFB,SLC7A8
CTNNB1	0.116	transcription regulator	Activated	2.017	4.48e-11	ACTC1,ANXA1,BIRC5,CA3,Ccl7,CCN4,CCNA2,Cd52,CDKN1A,CFD,CTSZ,CYP1A1,CYP2E1,CYP7B1,DIAPH3,EREG,F13A1,FCER1G,FN1,FST,GADD45G,GNAO1,GREM1,HHIP,HMGCS2,IL6,IRS1,ITGB2,KDR,LGALS3,LIPA,LPL,MMP13,MMP14,MMP3,MPEG1,MYH6,NRCAM,PLAU,PLIN2,PSAP,RPL10,RPS2,S100A8,Saa3,SEMA6A,SERPINA3,SERPINE1,SPP1,TGM1,TIMP1,TNC,TNFRSF1B,VCAN
cyclic AMP		chemical - endogenous mammalian	Activated	2.039	0.000191	ARG1,CCL2,CD80,CDKN1A,FCGR1A,FN1,IGFBP3,IL1RN,IL6,KDR,NR4A2,Saa3,SERPINE1,SOCS3,TIMP1
lysophosphatidylcholine		chemical - other	Activated	2.058	2.1e-06	CCL2,Ccl2,CCL3L3,FABP5,IL6,LPL,NAIP,OLR1,PLAU,SERPINE1
hyaluronic acid		chemical - endogenous mammalian	Activated	2.073	3.94e-13	BIRC5,Ccl2,CCL3L3,CD80,CTSK,CXCL10,FN1,FST,IL6,MMP12,MMP13,MMP3,NR4A2,PLAU,SERPINE1,SOCS3,SPP1,TIMP1,TLR2
IGF1	0.951	growth factor	Activated	2.075	6.95e-14	ADM,BCL2A1,BIRC5,C1QA,Ccl2,CCL3L3,Ccl7,CCNA2,CCNG1,CDK1,CDKN1A,CNN1,CTSD,CYBA,CYBB,FN1,GADD45G,H2AX,HMOX1,IGFBP3,IL6,IRS1,LCN2,LPL,MKI67,MMP13,MMP14,MMP3,MUC5B,MYH6,PBK,PLAU,PLEK,PTGER4,SERPINE1,SOCS3,SPP1,TGFBI,THBS1,TNFRSF12A
F2R	0.145	G-protein coupled receptor	Activated	2.075	0.00018	CCL2,Ccl2,FN1,HMOX1,IL6,KDR,PLAU,PTAFR,THBS1
CCN1	0.23	other	Activated	2.101	6.65e-10	CCL2,Ccl2,CCL3L3,Ccl7,CDKN1A,CXCL10,FCER1G,FN1,IL6,KDR,MMP3,PLAU,SERPINE1,TIMP1,TLR7
MAP3K7		kinase	Activated	2.109	2.36e-10	Ccl2,Ccl7,CD14,CFB,CH25H,CXCL10,HMOX1,IL6,IRF7,MMP13,MMP3,OAS2,Saa3,SERPINE1
carboplatin		chemical drug	Activated	2.111	1.44e-08	CLDN4,FCGR2A,GPNMB,HAS2,LCN2,LGALS3,Ms4a6b,PLA1A,SPP1,TIMP1,TNFRSF12A
KLF6	0.077	transcription regulator	Activated	2.112	4.44e-07	ARG1,BIRC5,CCL2,Ccl2,CCL3L3,CDKN1A,CYP1A1,IL6,MKI67,NR1D1,PLAU
tributyrin		chemical drug	Activated	2.138	7.34e-05	ADM,BCL2A1,CCL2,CDKN1A,IL6,MMP13,OLR1,RGS4
tunicamycin		chemical - endogenous non-mammalian	Activated	2.147	0.0167	Abcb1b,Ccl2,CDKN1A,Hamp/Hamp2,HMOX1,IL6,MMP3,PLIN2,SLC7A11,TLR2
etoposide		chemical drug	Activated	2.15	0.000158	BCL2A1,BIRC5,CCL2,CD80,CDK1,CDKN1A,CTSD,CXCL10,GADD45G,H2AX,IL6,IRF7,TOP2A
N-acetylmuramyl-L-alanyl-D-isoglutamine		chemical - endogenous non-mammalian	Activated	2.151	0.00333	CCL2,CD80,IL6,ITGB2,MSR1
CYP2E1	-1.2	enzyme	Activated	2.155	3.85e-05	C3AR1,Ccl2,CD14,HMOX1,IL6
NRG1		growth factor	Activated	2.156	0.000587	CDKN1A,FABP5,FN1,GDA,HEXB,HMOX1,ITGAM,ITGB2,MSR1,MYH6,PLAU,SERPINE1,THBS1,TNNT2,TOP2A
cyclophosphamide		chemical drug	Activated	2.157	7.34e-05	FCGR2A,IL6,LGALS3,PLA1A,SPP1,THBS1,TIMP1,TNFRSF12A
Ca2+		chemical - endogenous mammalian	Activated	2.166	0.000279	CCR2,CD80,CDKN1A,CYP1A1,FABP5,FN1,IL6,MMP19,MSR1,NR1D1,S100A8,S100A9,SERPINE1,SPP1,TGM1
IFNA4	-0.469	cytokine	Activated	2.174	0.00156	CXCL10,ISG15,LILRB4,RSAD2,ZBP1
temozolomide		chemical drug	Activated	2.176	0.000164	CCL2,CDKN1A,CXCL10,H2AX,IL6,MMP14
CDX2	-0.024	transcription regulator	Activated	2.177	0.214	BIRC5,CDKN1A,DHRS9,SLC7A8,TFF2
NOX4	-0.278	enzyme	Activated	2.178	8.7e-07	CCL2,Ccl2,CDKN1A,FN1,H2AX,HAS2,Saa3,SERPINE1
inosine		chemical - endogenous mammalian	Activated	2.18	3.82e-10	ANXA1,C1QA,C1QB,C1QC,CCL3L3,CD63,CD68,CFB,CFD,CXCL13,Ms4a6b,TIMP1
Map3k7	0.172	kinase	Activated	2.18	1.66e-05	Ccl2,CCL3L3,Ccl7,CXCL10,HAS2,IL6,ISG15,RSAD2,S100A9
JUN	-0.429	transcription regulator	Activated	2.181	6.79e-19	Abcb1b,ANXA1,ARG1,BCL2A1,C1QB,C3AR1,CA3,CCL2,Ccl2,Ccl7,CCNA2,CD14,CD68,CDK1,CDKN1A,CFD,CHL1,Clca3a1/Clca3a2,CXCL10,CXCL16,EREG,FN1,FOLR2,HMOX1,IFI16,IGFBP3,IL6,IL7R,ITGAM,KDR,LGALS3,MMP12,MMP13,MMP3,MMP8,MSR1,MYH6,NRCAM,PLAU,PTPRN,SERPINE1,SOCS3,SPP1,SPRR1A,THBS1,TIMP1,TNC
PLAT	0.901	peptidase	Activated	2.183	3.16e-05	CCL3L3,CXCL10,FN1,IL6,MMP3,SERPINE1
S100A4	0.982	other	Activated	2.184	4.71e-11	Ccl9,CDKN1A,FN1,MMP13,MMP14,PF4,PLAU,S100A8,S100A9,Saa3,THBS1,TIMP1
NFKBIZ	0.029	transcription regulator	Activated	2.185	5.13e-05	Ccl2,IL6,LCN2,S100A8,S100A9
C1QA	2.055	other	Activated	2.188	3.1e-09	C3AR1,Ccl2,CD80,CXCL10,IL6,LCN2,SERPINA3,SERPINE1,TIMP1
IL-1R		group	Activated	2.19	0.00011	IL6,MMP13,MMP14,MMP3,MMP8
sodium orthovanadate		chemical reagent	Activated	2.191	0.000435	CCL2,CCNA2,CDKN1A,MSR1,SERPINE1
sodium chloride		chemical - endogenous mammalian	Activated	2.194	0.00399	Ccl2,CYBA,CYBB,FN1,HMOX1,SPP1
ATF4	0.133	transcription regulator	Activated	2.194	0.00705	AREG,ATP1A2,CCL2,CDKN1A,FN1,IL6,LGALS3,SH3BP2,SLC7A11,TNFRSF12A
VDR	-0.041	transcription regulator	Activated	2.195	1.97e-10	ANLN,Ccl2,CD14,CDKN1A,CXCL10,FGG,GADD45G,IGFBP3,IL1RN,IL6,ISG15,KIF11,LGALS1,LPL,NUSAP1,PLIN2,PRC1,S100A8,S100A9,SOCS3,SPP1,TLR2,TMEM100,TPX2
CXCL3	0.001	cytokine	Activated	2.195	2.04e-05	Ccl2,CCL3L3,CLEC6A,CXCL10,IL6
cuprizone		chemical toxicant	Activated	2.195	0.00011	Ccl2,CCL3L3,Ccl7,CXCL10,SOCS3
MAP3K5	-0.31	kinase	Activated	2.2	7.29e-08	Ccl2,Ccl7,CDKN1A,CYBB,HMOX1,IL6,TGM1
CYBA	1.316	enzyme	Activated	2.2	1.31e-06	CDKN1A,CYBB,FN1,IL6,SERPINE1
LTF	1.467	peptidase	Activated	2.2	0.00011	Ccl2,CCL3L3,CDKN1A,IL6,MMP13
CYBB	1.743	enzyme	Activated	2.2	0.000599	Ccl2,CXCL10,CYBA,CYBB,IL6
PRNP	0.598	other	Activated	2.2	0.00129	CCL2,CTSD,FST,H2AX,HSPA1A/HSPA1B,IL6,IRS1
ELK1	-0.133	transcription regulator	Activated	2.2	0.00789	CDKN1A,MMP13,SLC7A11,SPP1,THBS1
EREG	1.166	growth factor	Activated	2.201	2.83e-05	AREG,EREG,HAS2,IL6,TNC
NfkB1-RelA		complex	Activated	2.201	6.71e-05	ADAMTS4,CCL2,IL6,MMP13,MMP3
PF4	1.27	cytokine	Activated	2.202	0.000307	CCL2,CDKN1A,CNN1,IL6,ITGAM
desoxycorticosterone		chemical - endogenous mammalian	Activated	2.203	6.35e-06	CYBA,CYBB,MMP12,SERPINE1,SPP1
CARM1	-0.12	transcription regulator	Activated	2.205	0.00106	Ccl2,CDKN1A,CXCL10,MMP13,MMP3
AR	-0.517	ligand-dependent nuclear receptor	Activated	2.207	5.31e-08	ADM,ARG1,BIRC5,Ccl2,CCL3L3,CCNA2,CDKN1A,DEPDC1,EDNRB,FABP5,GSN,GUCY1A1,GUSB,IGFBP3,IL6,MYH6,MYOZ2,NUSAP1,PBK,PLAU,Pln,SERPINA3,SERPINE1,SLC7A11,SPP1,THBS1,TNFRSF12A,TNNT2,TPX2,UBE2C,VCAN,ZBP1
CXCL2	0.621	cytokine	Activated	2.209	2.04e-05	Ccl2,CCL3L3,CXCL10,IL6,ITGAM
RIPK2	-0.066	kinase	Activated	2.212	0.0176	Ccl2,CLEC4E,CLEC5A,CXCL10,IL6
GIP	-0.237	other	Activated	2.213	1.43e-05	Ccl2,Ccl7,IL6,LPL,SPP1
CpG ODN 2395		chemical reagent	Activated	2.213	3.85e-05	Ccl2,CCL3L3,CD14,HMOX1,IL6
nitroarginine		chemical reagent	Activated	2.213	0.000367	CCL2,Ccl9,CD53,HMOX1,SPP1
F3	0.785	transmembrane receptor	Activated	2.213	0.000434	AREG,ARG1,CCL2,Ccl2,IL6,ITGAM,SERPINE1
GAST	-0.353	other	Activated	2.213	0.0259	AREG,Hamp/Hamp2,PLA2G7,S100A6,TNC
PCSK9	-0.167	peptidase	Activated	2.216	6.35e-06	Ccl2,Ccl7,IL6,OLR1,TLR2
Lymphotoxin		complex	Activated	2.216	3.85e-05	CCL2,CXCL10,CXCL13,IL6,MMP3
Hif1		complex	Activated	2.216	5.78e-05	ADM,BIRC5,CDKN1A,FN1,HMOX1,LGALS1,S100A8,SERPINE1
monophosphoryl lipid A		chemical drug	Activated	2.219	9.69e-06	Ccl2,CD80,CXCL10,IL1RN,IL6
TNK1	-0.051	kinase	Activated	2.219	2.83e-05	IFI16,IL6,IRF7,OAS2,TLR8
HSPA9	0.481	other	Activated	2.219	0.000256	CDKN1A,FN1,MMP13,MMP3,MMP8,TIMP1
POU2F2	-0.086	transcription regulator	Activated	2.219	0.00943	CCR5,DHRS9,GATM,RPS2,SPP1,TNFRSF12A
CCR5	2.572	G-protein coupled receptor	Activated	2.223	0.000222	Ccl2,CCL3L3,CCR5,CXCL10,IL6,TNFRSF1B
TGFB3	0.061	growth factor	Activated	2.224	0.00794	CDKN1A,FN1,MMP3,PTAFR,SERPINE1,THBS1,TNC
poly dA-dT		chemical reagent	Activated	2.225	2.04e-05	CXCL10,IL6,ISG15,RSAD2,ZBP1
HEY2	-0.093	transcription regulator	Activated	2.229	0.000512	CNN1,IL6,MYH6,MYL7,SLN
fingolimod phosphate		chemical - endogenous mammalian	Activated	2.236	3.03e-07	CCL2,HAS2,IL6,SERPINE1,THBS1
ponesimod		chemical drug	Activated	2.236	3.03e-07	CCL2,HAS2,IL6,SERPINE1,THBS1
Ccl6	1.608	cytokine	Activated	2.236	6.7e-07	Ccl2,CCL3L3,CTSK,CTSS,CTSV
Pdgfr		group	Activated	2.236	1.31e-06	AREG,CCL2,EREG,FN1,TNC
TNNI3	-0.774	transporter	Activated	2.236	2.36e-06	Ccl2,CCL3L3,CCR1,CCR2,CCR5
3M-001		chemical drug	Activated	2.236	8.64e-05	CCL2,CD80,CXCL10,IL6,ISG15
PARPBP	0.679	other	Activated	2.236	8.64e-05	COL8A1,CYP2E1,INMT,TIMP1,TNC
SELPLG	0.785	other	Activated	2.236	0.000929	BCL2A1,BST1,CCL2,CDKN1A,ITGAM
thapsigargin		chemical toxicant	Activated	2.237	1.06e-06	Abcb1b,Ccl2,CCL3L3,CD80,CDKN1A,CLDN4,CXCL10,FN1,HMGCS2,HMOX1,HSPA1A/HSPA1B,IL6,ITGB2,OLR1,THBS1,TLR2,TMEM100
AGER	-0.069	transmembrane receptor	Activated	2.248	2.94e-11	ARG1,CCL2,Ccl2,CCL3L3,CDKN1A,CTSK,IL6,LPL,MMP12,MMP3,S100A8,S100A9,SERPINE1,TNC
KLF5	-0.346	transcription regulator	Activated	2.248	3.03e-05	ARG1,BIRC5,CCNA2,CCNB2,CDK1,CDKN1A,LAMA1,S100A9
Pam3-Cys		chemical toxicant	Activated	2.253	1.62e-07	CCL2,CD14,CD80,CXCL10,IL1RN,IL6,SERPINE1,TLR2,TNC
MAP3K8	0.352	kinase	Activated	2.27	9.25e-05	ARG1,C130026I21Rik (includes others),Ccl2,CCR1,CCR2,CCR5,IL6,MARCO,MMP3,PTGER4,SLFN12L,SOCS3
lysophosphatidic acid		chemical - other	Activated	2.279	6.52e-07	AREG,CCL2,Ccl2,CD14,CXCL10,IL6,ITGAM,KDR,LPL,MSR1,PLAU,SERPINE1
YAP1	-0.373	transcription regulator	Activated	2.287	7.22e-06	ANLN,AREG,BIRC5,CCNA2,CDK1,CDKN1A,DIAPH3,FN1,H2AX,HMGCS2,IL6,ITGB2,LPL,RPL10,RPS2,RRM1,SERPINE1,THBS1,TOP2A
5-hydroxytryptamine		chemical - endogenous mammalian	Activated	2.303	0.0269	CCL2,CYBB,IL6,MMP13,SERPINE1,THBS1
E. coli lipopolysaccharide		chemical - endogenous non-mammalian	Activated	2.304	4.81e-06	CCL2,Ccl2,CD80,CXCL10,IL6,S100A8,S100A9,SOCS3,TREM2
PLG	0.032	peptidase	Activated	2.306	3.78e-05	ARG1,CCL2,CLEC7A,EDNRB,FCGR2B,IL6,MMP12,PLAU,SERPINE1
DNMT3A	0.093	enzyme	Activated	2.309	0.000104	ACTC1,CYBB,FCER1G,GNAO1,GUCY1A1,IRS1,MYH6,PLA2G7,PLD4,SLN,SOCS3,SPP1,TNNT2
MIF	0.827	cytokine	Activated	2.321	1.19e-08	ADGRE1,ARG1,C3AR1,CCL2,Ccl2,CCL3L3,CCR1,CCR5,CD84,CXCL16,IL6,IL7R,MMP13,MMP3,TIMP1
VEGFA	-0.615	growth factor	Activated	2.333	3.63e-11	BCL2A1,BIRC5,CCL2,Ccl2,CCL3L3,Ccl9,CD68,CD80,CDKN1A,CSTB,CTSB,CTSS,CTSV,CXCL10,FN1,HMOX1,IL6,KDR,MKI67,MMP12,MMP13,NR4A2,PLAU,RGS5,SERPINE1,THBS1,TIMP1,TNC
RABL6	-0.028	other	Activated	2.333	1.46e-05	CCNA2,H2AX,HMOX1,NDC80,PBK,PRC1,TOP2A,TPX2,UBE2C
cephaloridine		chemical drug	Activated	2.333	0.000273	AKR1B10,CD72,CXCL10,CXCL13,GPNMB,HMOX1,HSPA1A/HSPA1B,MMP12,TNFRSF12A
Pka		complex	Activated	2.333	0.00042	AREG,BIRC5,CD14,CDKN1A,CXCL10,HAS2,HMOX1,IL6,MMP3,NR4A2
FOXM1	0.541	transcription regulator	Activated	2.338	2.74e-07	ANXA1,BIRC5,CCNA2,CCNB2,CDK1,CDKN1A,CDKN3,GTSE1,IL1RN,IL6,KDR,MKI67,PRC1,TOP2A,VCAN
TNFRSF1A	0.047	transmembrane receptor	Activated	2.342	9.3e-09	CCL2,Ccl2,CCL3L3,CD68,CDKN1A,CXCL10,CXCL13,IL6,ITGAM,KDR,LCN2,MMP13,MMP14,PLAU,Saa3,SERPINE1,SOCS3
BRD4		kinase	Activated	2.343	0.000248	ANKRD37,CCNA2,CCR1,FN1,HMOX1,IL7R,PDGFC,PLAU,THBS1,TIMP1,TOP2A
cadmium		chemical toxicant	Activated	2.345	0.000143	Abcb1b,CDKN1A,CYP1A1,HMOX1,LGALS3,Mt2,PLAU,TIMP1
KRAS	-0.308	enzyme	Activated	2.351	8.63e-15	Acp5,AKR1B10,AREG,ARG1,BCL2A1,BEX1,BIRC5,CCL2,Ccl2,CCNA2,CD80,CDKN1A,CLEC10A,CLEC5A,CSF2RB,CXCL10,CYBB,EREG,FCGR2A,FCGR2B,FN1,GSN,H1-2,HEXA,HMOX1,IL6,ISG15,ITGAM,ITGB2,LCN2,LGALS3,LTBP4,mir-8,MMP3,MSR1,OAS1,OR5V1,PLA1A,PRC1,S100A6,SERPINA3,SLC7A10,SLC7A11,Slfn2,SPP1,THBS1,TLR2,TNC,TNFRSF12A,TOP2A,VCAN
EP300	-0.307	transcription regulator	Activated	2.358	2.12e-05	BIRC5,CCL2,CD53,CD80,CDKN1A,CYP1A1,EPSTI1,FN1,HMGCS2,HMOX1,IL6,IL7R,ITGB2,KDR,MKI67,MYO1F,OLR1,PLA2G7,RSAD2,SLC7A11,SOCS3,TLR2,TNC,UBE2C
N-nitro-L-arginine methyl ester		chemical drug	Activated	2.359	7.89e-10	ADM,CCL2,Ccl2,CCR5,CD68,CD80,CYBA,CYBB,FN1,HMOX1,IL6,OLR1,SERPINE1,TIMP1,TLR2
CREB1	-0.081	transcription regulator	Activated	2.36	7.13e-05	ADM,ADRA1A,ARG1,BIRC5,CCNA2,CCNB2,CD68,CDKN1A,CH25H,CNN1,FN1,GADD45G,GDA,GPNMB,GRIA1,HAS2,HMOX1,IL6,IRF7,LCN2,LPL,mir-297,MKI67,MMP13,MUC5B,NR4A2,PTPRN,TCEAL9
HIF1A	0.989	transcription regulator	Activated	2.361	1.97e-08	ADM,ALOX5AP,ANKRD37,BIRC5,Ccl2,CCR2,CCR5,CDKN1A,CEMIP,CTPS1,CTSD,EDNRB,EREG,FN1,H1-2,H2AX,Hamp/Hamp2,HMOX1,IGFBP3,IL6,ITGB2,LGALS1,mir-8,MMP13,SERPINE1,SOCS3,THBS1,TIMP1,TLR2
MALP-2s		chemical reagent	Activated	2.369	2.53e-05	BCL2A1,CCL3L3,IL6,ITGAM,TARM1,TLR2
D-galactosamine		chemical - endogenous mammalian	Activated	2.373	0.000256	CD14,CTSB,CXCL10,CYP2E1,IL6,TIMP1
MAP2K3	0.226	kinase	Activated	2.375	6.41e-09	CDKN1A,CTSK,CXCL10,IL6,ISG15,MMP13,MMP3,MUC5B,MYH6,PLAU,Pln,SERPINE1
AVP	-0.05	other	Activated	2.378	0.000294	ADM,CCL2,EDNRB,IL6,RRM1,S100A6
MAPKAPK2	0.394	kinase	Activated	2.383	2.72e-09	ARG1,CCL2,Ccl2,CCL3L3,Ccl7,CXCL10,IL6,MARCO,MSR1,PLA1A,PLAU,TOP2A
CpG ODN 1668		chemical reagent	Activated	2.383	7.57e-08	Ccl2,CCL3L3,CD300LD,CD80,CXCL10,IL6,IRF7,ISG15,SOCS3,TLR7
BRD7	-0.033	transcription regulator	Activated	2.383	7.01e-06	CCNG1,CDKN1A,CYP1A1,FN1,SERPINE1,VCAN
monocrotaline		chemical toxicant	Activated	2.385	3.29e-05	BIRC5,Ccl2,CYBB,HMOX1,IL6,Pln,SPP1
SAA1	0.236	transporter	Activated	2.393	1.79e-09	ARG1,Ccl2,CCL3L3,CXCL10,IL1RN,IL6,MMP13,MMP3,S100A8,S100A9
ITGA9	-0.15	other	Activated	2.393	7.01e-06	Ccl2,CCL3L3,IL6,MMP14,MMP3,TNC
ETS2	-0.467	transcription regulator	Activated	2.4	2.1e-06	CDKN1A,HMOX1,HPSE,MMP13,MMP3,MSR1,PLAU,SPP1,TFEC,Tlr13
ALB	-0.149	transporter	Activated	2.4	7.31e-06	CCL2,Ccl2,CDKN1A,CYBA,EDNRB,HPSE,IL6
methamphetamine		chemical drug	Activated	2.4	0.00343	ADGRE1,Ccl2,HMOX1,IL6,LGALS1,TNFRSF1B
MAPKAP1	0.085	other	Activated	2.401	8.44e-07	CXCL10,IFI16,Mx1,OAS2,PHF11,Slfn2
CREBBP	-0.32	transcription regulator	Activated	2.401	3.83e-05	BIRC5,CCR5,CD53,CD80,CDKN1A,CXCL10,CYBB,EPSTI1,HAS2,HMGCS2,IL6,IL7R,ISG15,LPL,MYO1F,NR4A2,RSAD2,SERPINA3,SLC7A11,SOCS3,TLR2,TNC
PRKCB	0.328	kinase	Activated	2.401	0.000201	Acp5,CD80,CDKN1A,FN1,IL6,Mx1,SERPINE1
cobalt chloride		chemical reagent	Activated	2.403	0.00569	ADM,CDKN1A,CYP1A1,HMOX1,RGS1,RGS5
PRKCD	0.47	kinase	Activated	2.404	7.38e-10	BCL2A1,BIRC5,CCL2,Ccl2,CCNA2,CD68,CDKN1A,CEMIP,CTSB,CXCL10,CXCL16,IL1RN,IL6,ITGAM,MMP12,MMP13,MUC5B,OAS1,SERPINE1,TLR2
UTP		chemical - endogenous mammalian	Activated	2.405	2.3e-08	CCL2,Ccl2,CD14,H2AX,HAS2,SERPINE1,SPP1,THBS1
MOG	-0.002	other	Activated	2.408	8.35e-10	ARG1,Ccl2,CCL3L3,Ccl7,CCR1,CCR2,CCR5,CD80,CXCL10,IL6,MKI67,MMP3
C5AR1	0.788	G-protein coupled receptor	Activated	2.408	1.26e-05	Ccl2,CD80,FCER1G,FCGR1A,FCGR2A,FCGR2B,IL6,SERPINE1
ESR1	0.086	ligand-dependent nuclear receptor	Activated	2.41	2.41e-08	ACTC1,ALOX5AP,ANLN,AREG,BIRC5,CCL2,CCNA2,CCNG1,CDK1,CDKN1A,CDKN3,CLDN4,CLEC7A,CNN1,COL5A2,COL8A1,COTL1,CTSB,CTSD,CTSS,CYP1A1,CYP2E1,CYP7B1,DIAPH3,EREG,FST,GLRX,GREM1,GRIA1,GSN,GUCY1A1,HMGCS2,HPGDS,IGFBP3,IL6,INMT,IRS1,KNL1,LCN2,LGALS1,LPL,LTBP4,LTF,mir-8,MKI67,NR1D1,NRCAM,OLR1,PBK,PLAU,PLIN2,RSAD2,S100A9,SERPINE1,SLC4A5,SLC7A11,SLC7A8,SPP1,SPRR1A,TFF2,THBS3
advanced glycation end-products		chemical - endogenous mammalian	Activated	2.412	1.96e-05	CCL2,CDKN1A,FN1,IL6,MKI67,SERPINE1,SPP1
ZBP1	1.375	other	Activated	2.414	5.38e-07	CCL3L3,CXCL10,IL6,ISG15,Mx1,OAS1
MTOR	-0.075	kinase	Activated	2.415	0.00117	ADM,BCL2A1,BEX1,BIRC5,CCL2,CDKN1A,FABP5,FN1,FST,Hamp/Hamp2,HMGCS2,IFI16,IL6,IRS1,OAS1,SOCS3,UBE2C
RUNX2	0.162	transcription regulator	Activated	2.416	1.47e-06	BIRC5,CCR2,CCR5,CDKN1A,FN1,LGALS3,MKI67,MMP13,MMP14,PLAU,SERPINE1,SPP1,TIMP1
genistein		chemical drug	Activated	2.422	2.52e-18	ADM,ARG1,ATP6V0D2,BIRC5,CCL2,Ccl2,CCNB2,CCR2,CD68,CD80,CDK1,CDKN1A,CFD,CTSB,CTSD,CTSK,CTSV,CXCL10,CYP1A1,EREG,FCGR2B,GUSB,HEXA,HEXB,HMOX1,HSPA1A/HSPA1B,IL6,IRF7,ITGB2,LGMN,LIPA,LPL,LTF,LY86,MMP13,MMP3,PLA2G7,PSAP,PTAFR,SERPINE1,SLC11A1,SPP1
pristane		chemical toxicant	Activated	2.423	2.47e-08	Ccl2,CCL3L3,CXCL10,FN1,IFI16,IL6,IRF7,ISG15,Mx1
MAP2K6	-0.383	kinase	Activated	2.423	2.92e-08	CCL2,Ccl2,CDKN1A,CXCL10,IL6,IRS1,ISG15,MMP13,MMP3,MYH6,PLAU,Pln
FZD9	-0.109	G-protein coupled receptor	Activated	2.425	1.28e-06	Ccl2,CXCL10,IFI16,Ifi27l2a/Ifi27l2b,IRF7,ISG15
MAC		complex	Activated	2.425	1.22e-05	AREG,FN1,MMP13,MMP3,SPP1,THBS1
MYBL2	0.011	transcription regulator	Activated	2.425	8.19e-05	BIRC5,CCNA2,CCNB2,CDK1,TFEC,TOP2A,UBE2C
collagen type i (family)		group	Activated	2.429	1.57e-05	CCL2,IL1RN,MMP13,MMP19,MSR1,SERPINE1
STAT3	0.168	transcription regulator	Activated	2.43	1.21e-25	ADM,AREG,ARG1,BEX1,BIRC5,CCL2,Ccl2,CCL3L3,CCR1,CCR5,CD80,CDK1,CDKN1A,CFB,CTSB,CXCL10,CXCL13,ECT2,FCER1G,FCGR1A,FGG,FN1,FST,GADD45G,GPR65,HAS2,HMOX1,IFI16,IFI30,IL1RN,IL6,IRF7,ISG15,ITGAM,ITGB2,KDR,LILRB4,LTF,MAFB,mir-181,MMP12,MMP13,MMP3,Mx1,NR4A2,OAS1,OAS2,PLAU,PTAFR,RSAD2,S100A9,SERPINA3,SERPINE1,SLFN12L,SLFN13,Slfn2,SOCS3,THBS1,TIMP1,TNFRSF1B,VCAN
uric acid		chemical - endogenous mammalian	Activated	2.43	3.23e-06	ANXA1,CCL2,Ccl2,CCL3L3,CD80,H2AX,HMOX1,IL6,IRF7,ISG15,RSAD2
ethanol		chemical - endogenous mammalian	Activated	2.431	2.08e-09	ADCY8,ADM,C3AR1,CCL2,Ccl2,Ccl7,CD14,CDKN1A,CYP2E1,CYP7B1,EDNRB,Hamp/Hamp2,HMOX1,IL1RN,IL6,IRF7,ITGAM,ITGAX,LGALS1,mir-8,MMP12,MMP13,MMP3,SERPINE1,SLC7A11,TIMP1,TLR2,TLR7,TLR8
TCL1A	-0.189	transcription regulator	Activated	2.433	3.27e-47	Acp5,APOBEC1,C1QA,C1QB,C1QC,C3AR1,CCR1,CD300LD,CD68,CLEC4D,CLEC4E,CLEC6A,CTSB,CTSD,CTSS,CYBB,FCER1G,FCGR2B,GPNMB,GUSB,HMOX1,IGSF6,ITGAM,ITGB2,LCN2,LTF,LY9,MAFB,MARCO,MMP12,MMP13,MMP19,MMP8,MPEG1,MSR1,MYO5A,RGS1,S100A8,S100A9,SLC11A1,SLC15A3,TLR7,TREM2
IFNE	-0.218	cytokine	Activated	2.433	2.89e-06	CD80,CDKN1A,CXCL10,HEXB,ISG15,PTGER4,ZBP1
TNFSF11	-0.012	cytokine	Activated	2.438	6.61e-19	Acp5,ADGRE1,ADRA1A,ATP6V0D2,BCL2A1,BST1,C3AR1,CCL2,Ccl2,CCL3L3,Ccl7,Ccl9,CCR1,CD14,CD300LF,CDKN1A,CLEC4E,CTSK,CYP1A1,ECT2,GLRX,HMOX1,IL1RN,IL6,ITGAM,MAFB,Phxr4,PTGER4,RACGAP1,Saa3,SERPINE1,Slfn2,SOCS3,SPP1,TLR2,TNFRSF1B
NR3C2	-0.646	ligand-dependent nuclear receptor	Activated	2.44	5.83e-09	ARG1,BCL2A1,CCL2,Ccl2,CCL3L3,Fcrls,FN1,GUCY1A1,IL6,KDR,LCN2,MMP12,MSRB1,NR4A2,SERPINA3,SERPINE1,TGFBI
Angiotensin II receptor type 1		group	Activated	2.449	3.29e-07	CCL2,CCL3L3,CXCL10,GLP1R,SERPINE1,TIMP1
SEMA7A	0.564	transmembrane receptor	Activated	2.449	7.01e-06	CCN4,CCNA2,CTSB,CTSS,FN1,TIMP1
PTPRJ	0.378	phosphatase	Activated	2.449	0.000179	CCL3L3,Ccl7,CCNA2,IL6,MARCO,PLA1A,SLFN12L
NEDD9	-0.059	other	Activated	2.449	0.0118	ADM,ANKRD37,AOAH,MMP14,PLIN2,SERPINE1
Fcer1		complex	Activated	2.463	2.17e-06	BCL2A1,CCL2,Ccl2,CCL3L3,Ccl7,Ccl9,FCGR2B,IL1RN,IL6
IL3		cytokine	Activated	2.466	2.18e-12	ADGRE1,ALOX5AP,AREG,ARG1,C1QA,CCL2,Ccl6,CCNG1,CD14,CD53,CD63,CD80,CDKN1A,FCGR2A,FCGR2B,FGFR4,GADD45G,GNAO1,IL6,ITGAM,ITGAX,LCN2,LILRB4,LY9,MMP13,MMP3,PLA2G7,RPL10,SERPINA3,SLAMF7,SOCS3,TLR2
Pam3-Cys-Ser-Lys4		chemical reagent	Activated	2.467	3.12e-12	BCL2A1,CCL2,Ccl2,CCL3L3,CCR1,CCR2,CCR5,CD14,CD180,CD80,CXCL10,CXCL13,FCGR2A,FCGR2B,IL6,IRF7,MMP3,RGS1,TARM1,TLR2,Wfdc17
lipoteichoic acid		chemical - endogenous non-mammalian	Activated	2.485	2.05e-13	CCL2,Ccl2,CCR1,CCR5,CD14,CD80,CXCL10,CYBB,HMOX1,IL1RN,IL6,mir-8,NR4A2,PTAFR,TLR2,TLR7
Brd4	-0.341	kinase	Activated	2.496	6.93e-09	CCR2,CCR5,CFB,COL5A2,COL8A1,EDNRB,IL6,KDR,LGALS3,LY86,PLAU,TIMP1,TLR8
AREG	1.502	growth factor	Activated	2.496	1.38e-08	AREG,BIRC5,CCNA2,CCNB2,DESI2,EREG,HAS2,IL6,MKI67,PLAU,PRC1,PTAFR,TOP2A
D-glucose		chemical - endogenous mammalian	Activated	2.502	8.23e-12	Abcb1b,ACSS1,ANLN,ANXA1,CCL2,Ccl2,CDK1,CDKN1A,CNN1,CTSB,CTSV,CYBA,CYBB,CYP2E1,F7,FABP5,FN1,FST,GREM1,GSN,HMOX1,Ifi27l2a/Ifi27l2b,IL6,IRS1,KDR,LPL,MAFB,MMP13,MMP14,MSR1,MSRB1,Mt2,NR4A2,Orm1 (includes others),PBK,PLAU,PTPRN,S100A8,Saa3,SERPINE1,SPP1,THBS1,TIMP1,TLR2
doxorubicin		chemical drug	Activated	2.511	2.7e-10	ACTC1,ADM,ANXA1,AREG,BCL2A1,BIRC5,Ccl2,CCNB2,CD14,CDK1,CDKN1A,CDKN3,CLDN4,CTSB,CTSD,CYBB,DDIAS,GPNMB,H2AX,HMOX1,IRF7,LCN2,LGALS3,Ms4a6b,PLA1A,PRC1,PSAP,RRM1,SPP1,TIMP1,TNFRSF12A,TOP2A
CARD9	0.217	other	Activated	2.522	6.19e-10	Ccl2,CCR1,CCR5,CLEC4E,CLEC6A,CLEC7A,CXCL10,FCGR1A,IL6,TLR2
ARNT2	0.106	transcription regulator	Activated	2.53	0.0173	BST1,CCR1,Cd52,CYBA,FCGR2A,IFI16,LTF,MYH6,SPRR1A,TYROBP
SIM1	0.024	transcription regulator	Activated	2.53	0.0213	BST1,CCR1,Cd52,CYBA,FCGR2A,IFI16,LTF,MYH6,SPRR1A,TYROBP
TAC1	0.142	other	Activated	2.534	0.000311	CCL2,Ccl2,CXCL10,HMOX1,IL1RN,IL6,MAFB,SERPINE1
DCN	0.382	other	Activated	2.537	1.48e-05	CDKN1A,CXCL10,FST,IL6,IRS1,MMP13,SERPINE1,THBS1
calcimycin		chemical reagent	Activated	2.537	0.000467	CD14,CD80,FN1,IL6,LCN2,MMP13,MSR1,SERPINE1,TLR2
bromodeoxyuridine		chemical drug	Activated	2.543	7.57e-08	CXCL10,IFI16,IGFBP3,IL6,IL7R,IRF7,ISG15,OAS1,SERPINE1,TGFBI
Creb		group	Activated	2.547	1.93e-08	ADCY8,ADM,AREG,ARG1,BMP6,C3AR1,CCN4,CD14,CDKN1A,COL8A1,CTSB,CTSV,CXCL10,FCER1G,Fcrls,FHDC1,GDA,HAS2,IFI16,IL6,ITGAM,MUC5B,Saa3,SLC7A11,ZBP1
SAA		group	Activated	2.549	3.69e-06	ARG1,CCL2,Ccl2,IL1RN,IL6,MMP13,TLR2
NOD2	0.053	other	Activated	2.555	1.66e-05	AREG,BCL2A1,CCL2,CLEC4E,CLEC5A,CXCL10,IL6,ITGAM,SOCS3
HGF	0.228	growth factor	Activated	2.557	2.15e-10	BCL2A1,BIRC5,CCL2,Ccl2,CCNG1,CDK1,CDKN1A,CDKN3,CTSK,FN1,HMOX1,IGFBP3,IL6,ISG15,KIF11,LCN2,LGMN,MKI67,MMP13,MMP14,MMP8,NDC80,NR4A2,NRCAM,PLAU,PRC1,PTAFR,S100A9,SERPINE1,SOCS3,SPP1,THBS1,TIMP1,TPX2,UBE2C
PGF	0.935	growth factor	Activated	2.558	1.37e-06	ALOX5AP,BIRC5,CCL2,CDK1,EREG,FST,IL6,SERPINE1
IRF5	0.451	transcription regulator	Activated	2.562	0.000194	CDKN1A,CXCL10,IL6,IRF7,ISG15,OAS1,OAS2,RSAD2
IL17F	0.069	cytokine	Activated	2.563	1.71e-06	CCL2,CXCL10,IL6,LPL,MMP13,MMP3,TNFRSF1B
Vegf		group	Activated	2.571	2.41e-08	ALOX5AP,BCL2A1,BIRC5,Ccl2,CDK1,CDKN3,CNN1,CXCL10,FN1,FST,HMGCS2,HMOX1,HPSE,IGFBP3,IL6,KDR,KIF11,LCN2,MKI67,MMP13,MMP14,Mt2,NDC80,NR4A2,NRCAM,PLAU,PRC1,SOCS3,TIMP1,TNC,TPX2,UBE2C
PTH	0.013	other	Activated	2.571	5.04e-07	Acp5,AREG,CCL2,Ccl2,CDKN1A,CYBA,FN1,IGFBP3,IL6,MMP13,NR4A2,PLAU,RGS1,Saa3,SOCS3,SPP1
stallimycin		biologic drug	Activated	2.586	2.78e-05	CXCL10,IFI16,IL6,IL7R,IRF7,ISG15,OAS1
SREBF1	-0.131	transcription regulator	Activated	2.589	2.61e-05	CD14,CDKN1A,CFD,CXCL10,CYP7B1,FABP5,FN1,GPNMB,HMOX1,HSPA1A/HSPA1B,IFI30,IL6,LGALS3,LPL,SERPINA3,SERPINE1,TNFRSF1B
TFEB	-0.006	transcription regulator	Activated	2.59	3.87e-05	Acp5,CTSB,CTSD,CTSK,HEXA,IL6,PSAP
1-methyl-4-phenyl-1,2,3,6-tetrahydropyridine		chemical toxicant	Activated	2.59	0.000175	ADGRE1,Ccl2,CYBB,HMOX1,IL6,ITGAM,NR4A2,TNFRSF1B
HMGB1		transcription regulator	Activated	2.59	0.000391	CCL2,CCNG1,CD80,CDKN1A,IL6,MMP3,TLR2
ozone		chemical toxicant	Activated	2.591	7.05e-07	Ccl2,CCL3L3,Ccl7,CXCL10,HMOX1,IL6,SPP1
IFN type 1		group	Activated	2.591	3.29e-05	Ccl2,CXCL10,CXCL13,IFI16,IL6,ISG15,Mx1
WNT1	-0.084	cytokine	Activated	2.594	0.000617	BIRC5,CCN4,CCNG1,CDKN1A,FN1,GADD45G,MMP3,SERPINE1,SPP1,TFF2
MAP3K1	-0.121	kinase	Activated	2.595	1.72e-07	HMOX1,MMP13,MMP3,PLAU,RGS4,SERPINE1,THBS1,TIMP1,TNC,TOP2A
cytarabine		chemical drug	Activated	2.595	5.1e-05	CCL3L3,CD180,CD80,CDK1,CDKN1A,IL6,TLR2,TOP2A
SMAD2	0.085	transcription regulator	Activated	2.599	0.000165	CDKN1A,FN1,Hamp/Hamp2,HAS2,HMOX1,IL6,MMP13,SERPINE1,THBS1
IL36A	-0.101	cytokine	Activated	2.6	2.89e-06	Ccl7,CXCL10,IL6,LCN2,MMP3,S100A8,S100A9
dextran sulfate		chemical drug	Activated	2.606	3.61e-23	ANLN,ARG1,BIRC5,Ccl2,CCL3L3,CCNA2,CCR2,CD14,CD177,CD80,CDK1,CXCL10,HMOX1,IL6,IRF7,ISG15,KIF11,LCN2,MKI67,MMP13,MMP14,MMP3,MMP8,MSR1,NUSAP1,PRC1,PTAFR,RACGAP1,S100A8,S100A9,Saa3,SERPINE1,Slfn2,SOCS3,TFF2,THBS1,TIMP1,TLR2,TNFRSF1B,TOP2A,TPX2,UBE2C
OGA	-0.084	enzyme	Activated	2.607	3.25e-17	ACSS1,ALOX5AP,APOBEC1,APOC2,C1QA,C1QB,C3AR1,CCL2,Ccl2,CCL3L3,Ccl6,Ccl9,CCR1,CCR5,CD14,CD53,CD68,CDKN1A,CH25H,CNN1,CSF2RB,CXCL16,FGFR4,FN1,GADD45G,GSN,HPGDS,IGFBP3,MMP14,PLAU,PLD4,PLIN2,S100A6,Saa3,SLAMF9,SLFN12L,SOCS3,TGFBI,THBS1,TIMP1,TNC,TNFRSF12A,Tnfrsf22/Tnfrsf23
Pro-inflammatory Cytokine		group	Activated	2.607	2.72e-08	ADM,CXCL13,HMOX1,IL6,LCN2,LGALS1,MMP3,OLR1,SOCS3,TIMP1,TLR2
LAMA5	0.037	other	Activated	2.611	4.55e-08	Ccl2,CCL3L3,Ccl7,CCR1,CXCL10,MMP14,TNFRSF1B
ITGAM	2.109	transmembrane receptor	Activated	2.614	9.37e-09	BCL2A1,Ccl2,CCL3L3,CD80,CXCL10,IL6,LCN2,TIMP1,ZBP1
PRKD1	-0.171	kinase	Activated	2.617	7.11e-05	BIRC5,Ccl2,CCL3L3,CXCL10,IL6,LPL,MMP3
TYROBP	1.678	transmembrane receptor	Activated	2.619	5.8e-12	CCL2,CD84,FCGR2B,IL6,ITGAM,ITGAX,NCKAP1L,PLEK,SIRPB1,SPP1,TMEM106A,TNFRSF1B,TREM2,TYROBP
TSH		complex	Activated	2.619	5.1e-05	CDKN1A,CTSS,IGFBP3,IL1RN,IL6,KDR,mir-297,SOCS3
phorbol esters		chemical - other	Activated	2.619	0.00139	ANXA1,IL6,ITGAM,MMP3,PLAU,TGM1,TIMP1
IL23A	0.51	cytokine	Activated	2.621	2.23e-06	Ccl2,CLEC5A,CXCL10,CXCL13,IL6,S100A8,S100A9
CD38	0.143	enzyme	Activated	2.621	0.0246	CSF2RB,FN1,GADD45G,IFI30,IL6,LGALS3,S100A6,SOCS3
TICAM2	0.463	other	Activated	2.626	1.71e-07	CTSK,CXCL10,IL6,IRF7,MMP14,MMP8,S100A8
Lh		complex	Activated	2.628	0.00506	AREG,EREG,FST,HAS2,IL6,mir-181,MMP19,PTPRN,RGS4,RGS5,THBS1,TNFRSF12A
NCF1	0.997	enzyme	Activated	2.63	3.38e-08	ALOX5AP,Ccl2,CD14,CDKN1A,FN1,HAS2,HMOX1,SERPINE1
collagenase		group	Activated	2.63	5.87e-06	ADM,Ccl2,CCL3L3,Ccl7,CXCL10,IL6,Saa3
reactive oxygen species		chemical toxicant	Activated	2.63	1.44e-05	CCL2,CD80,CDKN1A,GLRX,HMOX1,HPSE,IL6,LAMA1,MMP3,SERPINE1,TLR2
HRAS	0.06	enzyme	Activated	2.637	6.92e-12	ADM,AREG,BIRC5,C1QC,Ccl2,CCL27,CCNA2,CCNG1,CDK1,CDKN1A,CFB,CNN1,COL5A2,CTSB,CTSS,CTSV,CTSZ,CXCL10,CYP1A1,FN1,GADD45G,GSN,GUSB,HAS2,HMOX1,IFI30,IL6,IL7R,ITGAM,MMP13,MMP14,MMP3,MSRB1,PDGFC,PLAU,RRM1,SERPINA3,SERPINE1,SLN,SOCS3,SPP1,TBX3,THBS1,TOP2A,VCAN
STAT4	0.09	transcription regulator	Activated	2.643	0.00153	ACSS1,CCL2,CCR5,CXCL10,FCER1G,GADD45G,HEXB,IL6,ISG15,Mx1,SERPINE1,SOCS3,TIMP1
TLR2	1.151	transmembrane receptor	Activated	2.644	3.74e-10	ARG1,CCL2,Ccl2,CCL3L3,CCR1,CCR2,CCR5,CD80,CDKN1A,CXCL10,CYBB,FN1,HMOX1,IL1RN,IL6,MMP13,MMP3,SLC7A11,SOCS3,TLR2
RNY3		other	Activated	2.646	7.05e-07	CXCL10,EPSTI1,ISG15,OAS1,OAS2,RSAD2,SIGLEC1
JAK1/2		group	Activated	2.646	0.000703	CCL2,Ccl2,GDA,IL6,IRF7,ISG15,RSAD2
trovafloxacin		chemical drug	Activated	2.646	0.00077	CDKN1A,HMOX1,IL6,MMP13,SERPINE1,SOCS3,THBS1
SMARCA4	0.082	transcription regulator	Activated	2.661	9.27e-11	AREG,BCL2A1,BIRC5,CCL2,CCNA2,CCR1,CCR2,CD63,CDKN1A,COTL1,CTSB,CTSS,CYP1A1,DHRS9,ECM2,EREG,FCGR2A,FGG,FN1,GADD45G,HEXB,HHIP,IFI16,IFI30,IL6,IL7R,KDR,LGALS1,LGALS3,PLIN2,RGS1,S100A6,SERPINE1,SLAMF9,SLC11A1,SPP1,TLR2,TM4SF19,TNNT2,TREM2
MAPK14	-0.026	kinase	Activated	2.68	2.73e-14	ALOX5AP,AREG,CCL2,Ccl2,Ccl7,CCNA2,CD80,CXCL10,EREG,FN1,GREM1,HAS2,HMOX1,IL6,KDR,MMP13,MMP3,MUC5B,MYH6,PLAU,SLFN12L,Slfn2,SOCS3,SPP1,TIMP1,TOP2A
MAP2K1	0.499	kinase	Activated	2.681	1.11e-07	AREG,BCL2A1,CCL2,CCL3L3,CCNA2,CDKN1A,CTSB,GUSB,IL6,IRS1,LGALS3,MMP12,MMP13,MMP14,MMP3,MUC5B,THBS1,TNC
C5	-0.355	cytokine	Activated	2.687	7.91e-09	CCL2,Ccl2,CCL3L3,CD63,CXCL10,CYBB,FCGR1A,FCGR2A,FCGR2B,FN1,IL6,ITGAM,ITGB2,MMP3,SERPINE1
captopril		chemical drug	Activated	2.704	6.5e-10	ANXA1,BIRC5,CYP2E1,FCGR2A,HMOX1,IL1RN,IL6,LCN2,LGALS3,Ms4a6b,MYH6,SPP1,TIMP1,TNFRSF12A
C3	-0.016	peptidase	Activated	2.714	7.1e-12	BCL2A1,C1QA,C3AR1,CCL2,Ccl2,CCL3L3,Ccl9,CXCL10,CXCL16,FN1,IL6,ITGAM,LCN2,TIMP1,ZBP1
E2F3	0.641	transcription regulator	Activated	2.728	4.15e-06	BIRC5,CCNA2,CCNB2,CDK1,CDKN1A,FST,H1-2,LPL,NCAPG2,RRM1,S100A8,SERPINE1,THBS1,TPX2,UBE2C
PI3K (family)		group	Activated	2.737	6.16e-08	ADM,AKR1B10,BIRC5,CCL2,CTSD,CXCL10,HMOX1,IL6,ISG15,MMP12,MMP3,SERPINE1,THBS1,TNC
decitabine		chemical drug	Activated	2.737	5.2e-07	Ccl2,Ccl9,CCNA2,CCR2,CDK1,CDKN1A,CXCL10,CYP1A1,EDA2R,FN1,GADD45G,GLRX,GSN,HMGCS2,HPSE,HSPA1A/HSPA1B,IFI16,IGFBP3,IL6,IL7R,IRF7,ISG15,LGALS1,LGALS3,MAFB,mir-181,MKI67,MMP13,MMP14,MMP3,NR4A2,OAS1,SOCS3,SPP1,TGFBI,THBS1,TNC,TOP2A,VCAN
BAX	0.638	transporter	Activated	2.739	1.36e-09	CDK1,CDKN1A,CTSB,CTSD,CTSK,CTSS,CXCL10,IL6,IRF7,MMP12,Mx1,TIMP1
CD14	1.024	transmembrane receptor	Activated	2.739	3.99e-07	BCL2A1,CCL2,Ccl2,CCL3L3,CXCL10,IL6,MSR1,SOCS3,TLR2
SP3	0.105	transcription regulator	Activated	2.746	4.94e-06	BIRC5,Ccl2,CDKN1A,CYP7B1,EREG,HAS2,HPSE,IGFBP3,KDR,LAMA1,LPL,PLAU,SERPINE1,TGM1,TIMP1,TLR2,TNC
nitrofurantoin		chemical drug	Activated	2.75	6.23e-08	CCL3L3,CCNG1,CTSB,CTSS,CTSV,CXCL10,GPNMB,HMGCS2,HMOX1,IGFBP3,IL6,LGALS3,MMP12,MMP14,SPP1,TIMP1,TNFRSF12A
RETN	-0.751	other	Activated	2.753	1.29e-06	CCL2,FABP5,HMOX1,IL6,LPL,MMP14,SERPINE1,SOCS3,SPP1
CAMP	-0.146	other	Activated	2.757	2.97e-07	CCL2,Ccl2,Ccl7,CD80,CXCL10,CXCL13,IL1RN,IL6,ITGAM,ITGAX,ITGB2,TLR2
phytohemagglutinin		chemical drug	Activated	2.757	0.0465	APOC2,CCL2,CCR2,CXCL10,FOLR2,IL6,IL7R,MMP12,NOP56,SPP1,TIMP1
IL21	-0.01	cytokine	Activated	2.758	9e-10	ARG1,CCL3L3,CDKN1A,CXCL10,CXCL13,FCER1G,FCGR2B,IFI16,IL6,IL7R,IRF7,ISG15,MKI67,MMP12,OAS2,RSAD2,SLFN13,SOCS3,TYROBP
CD40	-0.115	transmembrane receptor	Activated	2.759	2.04e-08	BCL2A1,BIRC5,CCL2,Ccl2,CCNA2,CD80,CDKN1A,CXCL10,FCGR2B,IL1RN,IL6,ITGAM,ITGB2,LGALS3,MMP14,MMP3,SERPINE1,SLAMF7,TLR2
PLAU	1.449	peptidase	Activated	2.765	5.52e-12	ARG1,CCL2,Ccl2,CCR5,FCGR1A,FN1,IL6,KDR,MMP12,OAS1,PLAU,S100A8,S100A9,SERPINE1,SLFN13
EIF2AK2	0.656	kinase	Activated	2.768	0.000372	ARG1,BCL2A1,BIRC5,CDKN1A,IL6,ISG15,OAS1,SOCS3
IL10	-0.092	cytokine	Activated	2.772	9.51e-43	ADM,ALOX5AP,ARG1,BCL2A1,BMP6,CCL2,Ccl2,CCL3L3,Ccl6,Ccl7,Ccl9,CCR1,CCR2,CCR5,CD14,CD63,CD68,CD72,CD80,CDKN1A,CLEC7A,CSF2RB,CTSB,CTSD,CTSS,CTSV,CTSZ,CXCL10,CXCL13,CXCL16,FCER1G,FCGR1A,FCGR2A,FCGR2B,FCGR3A/FCGR3B,Fcrls,GUSB,HEXA,HEXB,HMOX1,IFI30,IL1RN,IL6,IL7R,ITGAM,LGALS1,LGMN,LILRB4,LIPA,MKI67,MMP8,MSR1,NDC80,PF4,PLEK,PSAP,PTAFR,S100A8,SLC11A1,SOCS3,SPP1,TIMP1,TLR2,TLR7,TLR8,TNFRSF1B,TNIP3,TOP2A,V…
Ap1		complex	Activated	2.772	1.17e-08	BCL2A1,C3AR1,CCL2,CCL3L3,CCNA2,FN1,HMOX1,IGFBP3,IL6,LPL,MMP12,MMP13,MMP3,MSR1,PLAU,SERPINE1,TIMP1
TRAF6	0.183	enzyme	Activated	2.774	3.02e-06	CCL2,Ccl2,CD80,CXCL13,CXCL16,CYBB,IL6,MMP13,SERPINA3
IFIH1	0.311	enzyme	Activated	2.78	1.09e-08	CCL2,CXCL10,IL6,IRF7,ISG15,Mx1,OAS1,OAS2,RSAD2,SIGLEC1
JAK2	0.424	kinase	Activated	2.784	6.53e-07	CCL2,Ccl2,Ccl9,CDKN1A,CXCL10,CYBB,FCGR2B,FN1,IL6,LCN2,Saa3,SLAMF9,SLC11A1,SOCS3,THBS1
FGFR1	-0.017	kinase	Activated	2.789	0.00105	BIRC5,CDKN1A,HAS2,IL6,MMP13,MMP14,MMP3,PLAU
gentamicin		chemical drug	Activated	2.795	5.49e-08	Abcb1b,CCL2,Ccl2,CCNG1,CTSD,CTSV,CXCL10,CYP1A1,FMO1,GATM,H2AX,HMOX1,HSPA1A/HSPA1B,IGFBP3,IRF7,KYNU,LCN2,NR1D1,PLIN2,SPP1,TIMP1
phenacetin		chemical drug	Activated	2.8	2.57e-06	ANXA1,CLDN4,LCN2,LGALS3,PLA1A,SPP1,TIMP1,TNFRSF12A
1,4-bis[2-(3,5-dichloropyridyloxy)]benzene		chemical toxicant	Activated	2.8	0.00311	CCN4,CCNA2,CCNB2,CDK1,CDKN1A,CYP7B1,HMGCS2,LRG1
IL17RA	0.471	transmembrane receptor	Activated	2.813	2.39e-07	Ccl2,CCR1,IL6,MMP13,MMP3,S100A8,S100A9,TIMP1
oblimersen		biologic drug	Activated	2.813	5.48e-06	ADM,CDKN1A,IFI16,IRF7,ISG15,OAS1,OAS2,RSAD2
AKT1	0.316	kinase	Activated	2.823	5.43e-17	ACTC1,AKR1B10,BCL2A1,BIRC5,C1QC,CCL2,CCL3L3,Ccl6,Ccl9,CDKN1A,COL8A1,CTSV,CXCL10,DIAPH3,FABP5,FN1,GATM,HMOX1,IL6,IRS1,KDR,KLF15,LAMA1,LCN2,LIPA,MMP14,MSR1,MYH6,NDC80,SERPINE1,SPP1,THBS1,TIMP1,UBE2C,VCAN
PRKCA	-0.19	kinase	Activated	2.826	1.15e-07	CCL2,CDKN1A,CTSB,CXCL10,CYBB,FN1,HSPA1A/HSPA1B,IGFBP3,LPL,MMP3,RSAD2,S100A8,S100A9,SERPINE1
deferasirox		chemical drug	Activated	2.828	2.39e-07	F13A1,FAM20C,ITGAM,ITGB2,MCEMP1,MS4A6A,PLD4,RGS1
laminaran		chemical drug	Activated	2.828	5.34e-07	CLEC4E,CXCL10,EREG,IL7R,OLR1,RSAD2,TNC,TNIP3
CSF1R	0.843	kinase	Activated	2.828	2.57e-06	Acp5,ADGRE1,ARG1,CCL3L3,CDKN1A,HMOX1,IL6,MSR1
C11orf95-RELA		fusion gene/product	Activated	2.828	9.17e-06	Ccl2,CCL3L3,CXCL10,FN1,IL1RN,IL6,IRF7,S100A6
DOCK8	0.035	other	Activated	2.828	0.000128	CXCL10,IL6,IRF7,ISG15,PLA1A,RGS1,RSAD2,SLFN12L
SASH1	-0.285	other	Activated	2.828	0.000194	CXCL10,IL6,IRF7,ISG15,MARCO,PLA1A,RSAD2,SLFN12L
LGALS1	1.405	other	Activated	2.845	1.16e-08	ADAMTS4,Ccl2,CDKN1A,CXCL16,FN1,IL6,LGALS1,LGALS3,MMP12,MMP13,MMP3,SERPINE1
RELA	-0.192	transcription regulator	Activated	2.846	4.74e-13	Abcb1b,ALOX5AP,BCL2A1,BEX1,BIRC5,CCL2,Ccl2,CD14,CD80,CDKN1A,CFB,CTSB,CXCL10,CYBB,CYP1A1,FN1,HAS2,HMOX1,IL1RN,IL6,IL7R,IRF7,ISG15,mir-8,MMP3,Mx1,NR4A2,OAS2,OLR1,PLAU,PTGER4,RGS1,S100A6,Saa3,Tlr13,TLR2,Tnfrsf22/Tnfrsf23
deferoxamine		chemical drug	Activated	2.875	4.89e-12	ADM,CCL3L3,CD14,CDKN1A,F13A1,FAM20C,HMOX1,HSPA1A/HSPA1B,IFI16,IGFBP3,IL6,ITGAM,ITGB2,LCN2,LPL,MCEMP1,mir-8,MS4A6A,NR4A2,PLD4,RGS1,RSAD2,SERPINE1,SPP1
CXCL12	0.403	cytokine	Activated	2.878	2.53e-06	BMP6,CCL2,CD14,CTSK,CXCL10,FN1,IL6,ITGAX,MMP13,MMP14,MMP3,PLAU,SOCS3,THBS1,TIMP1,TNFRSF1B
IL27	-0.384	cytokine	Activated	2.889	1.63e-06	ADGRE1,CCL2,CD14,CD63,CD80,CXCL10,GADD45G,IL1RN,IL6,ITGAM,OAS1,SOCS3,TNFSF18
IRF1	-0.218	transcription regulator	Activated	2.895	3.55e-06	CCL2,CDKN1A,CFB,CTSS,CXCL10,CXCL16,CYBB,IL6,IRF7,ISG15,OAS1,OAS2,PF4,RSAD2,TBX3
FOXO1	-0.319	transcription regulator	Activated	2.899	1.53e-09	ANLN,ATP6V0D2,BCL2A1,BIRC5,C1QA,CCNA2,CCNB2,CDK1,CDKN1A,CH25H,CTSK,CTSV,CXCL10,DEPDC1,EDNRB,FABP5,FN1,FST,HMOX1,IL6,IL7R,IRS1,ITGAM,ITGB2,KIF11,LPL,MMP3,NUSAP1,PBK,PRC1,Prg4,SERPINE1,THBS1
IFNB1	0.238	cytokine	Activated	2.916	3.93e-17	Acp5,APOBEC1,CCL2,Ccl2,CCR5,CD14,CD80,CDKN1A,CH25H,CLEC4E,CTSK,CXCL10,CYP1A1,CYP2E1,Hamp/Hamp2,IFI16,Ifi27l2a/Ifi27l2b,IL6,IRF7,ISG15,ITGAX,Mx1,OAS1,OAS2,RSAD2,SIRPB1,SLFN13,SPP1,THBS1,TIMP1,Tlr13,TLR7,TLR8,ZBP1
arsenic trioxide		chemical drug	Activated	2.917	0.00321	ALOX5AP,ATP1A2,BCL2A1,CCL2,CDK1,CDKN1A,ECT2,FN1,GLRX,H2AX,HMOX1,ITGAM,KIF11,S100A8,SLC7A11
CpG ODN 1826		chemical reagent	Activated	2.923	2.39e-07	CCL2,CCL3L3,CD14,CD80,CXCL10,CYBA,CYBB,FCGR2B,IL6,IRF7,RGS1
IFNL1		cytokine	Activated	2.925	9.95e-07	CD80,CXCL10,IL6,ISG15,OAS1,OAS2,PHF11,RSAD2,SLC15A3,TLR2
MAVS	-0.125	other	Activated	2.945	2.53e-07	CXCL10,IL6,IRF7,ISG15,OAS1,OAS2,RSAD2,SOCS3,SPP1,TLR7
IFI16	2.679	transcription regulator	Activated	2.95	5.8e-09	AREG,CCL2,CDKN1A,CXCL10,CYP1A1,IFI16,IL1RN,IL6,IL7R,ISG15,LPL,Mx1,OAS1
CGAS	0.475	enzyme	Activated	2.952	1.88e-10	CDKN1A,CXCL10,IL6,IRF7,ISG15,MMP12,Mx1,OAS1,RSAD2
CEBPE	-0.006	transcription regulator	Activated	2.961	3.2e-12	ALOX5AP,Ccl7,Ccl9,CD14,CLEC10A,CTSV,F7,IL1RN,IL6,ITGAM,LCN2,LTF,MMP8,Orm1 (includes others)
D-fructose		chemical - endogenous mammalian	Activated	2.984	3.22e-07	Ccl2,Ccl7,CD68,CXCL10,FN1,IL6,ITGAM,THBS1,TIMP1
MET	-0.313	kinase	Activated	2.998	5.55e-06	AREG,CCL3L3,Ccl7,CDK1,CDKN1A,COL5A2,CTSV,FN1,HMOX1,IL6,MMP13,SOCS3,SPP1
HRG		other	Activated	3	1.06e-10	C1QA,C1QB,C1QC,Ccl6,FCGR1A,FCGR3A/FCGR3B,ITGAX,SPP1,TIMP1
KRT17	0.645	other	Activated	3	1.31e-08	CCL3L3,CCR1,CCR5,CLEC7A,CXCL10,IL6,MMP13,MMP3,SPP1
SMAD3	-0.088	transcription regulator	Activated	3.008	2.67e-09	AREG,BMP6,CCL2,Ccl2,CCL3L3,CDKN1A,CXCL10,CYP1A1,EREG,FN1,FST,Hamp/Hamp2,HAS2,HMOX1,IL6,MMP12,MMP13,Orm1 (includes others),SERPINE1,SPP1,TBX3,THBS1,TIMP1,TNC
TP63	0.158	transcription regulator	Activated	3.022	2.3e-07	ADM,APOBEC1,AREG,ARG1,CCNA2,CCNG1,CDK1,CDKN1A,CTSD,CXCL17,FN1,FST,GPNMB,GREM1,IGFBP3,IL6,mir-8,MKI67,MMP13,MMP14,PLAU,RACGAP1,S100A8,SERPINE1,SLC7A11,TFF2,THBS1,TNC,TOP2A
IL18	0.433	cytokine	Activated	3.024	2.72e-06	CCL2,Ccl2,CCL3L3,CCR5,CXCL10,CXCL16,FCGR3A/FCGR3B,GADD45G,IL6,ITGAM,MMP13,MMP3,SPP1,TIMP1
GATA2	-0.733	transcription regulator	Activated	3.031	1.38e-07	BPIFB1,C1QC,CCL2,Ccl2,CCL3L3,Ccl7,CCR2,CD177,CD300LD,CDKN1A,CLEC4E,CXCL10,CYBB,F13A1,GDA,GPR65,HMOX1,IL6,ITGAM,KDR,LCN2,LTF,MAFB,MCEMP1,S100A8,S100A9,Stfa2/Stfa2l1,THBS1
5-O-mycolyl-beta-araf-(1->2)-5-O-mycolyl-alpha-araf-(1->1')-glycerol		chemical - endogenous non-mammalian	Activated	3.051	1.91e-08	BCL2A1,CCL2,CCL3L3,CXCL10,KYNU,LRP12,NAIP,PLA2G7,RGS1,SLAMF7,SLC7A11,SOCS3,TNIP3
SNCA	-0.249	enzyme	Activated	3.052	4.99e-06	ADRA1A,CCL2,Ccl2,CD68,CDHR1,CHL1,COLGALT2,CTSB,CYBB,GDA,GSN,IL6,IRF7,ISG15,MMP3,MMP8,NR4A2,RSAD2,S100A6,SCN7A,SERPINE1
Tlr		group	Activated	3.058	6.1e-06	ARG1,CCL2,Ccl2,CD80,CXCL10,IL6,IRF7,LCN2,RGS1,SOCS3
Tnf (family)		group	Activated	3.061	1.69e-12	BCL2A1,BIRC5,C3AR1,CCL2,Ccl2,CCR5,CD72,CLDN4,CXCL10,CYP1A1,FST,IL6,KDR,LCN2,MMP13,Saa3,SERPINE1,SOCS3,TLR2,TNFRSF1B
homocysteine		chemical - endogenous mammalian	Activated	3.083	9.83e-09	CCL2,Ccl2,CDKN1A,CXCL10,HMOX1,IL6,ITGAM,LPL,MMP13,OLR1,Saa3,SOCS3,TIMP1
PDGFB	-0.195	growth factor	Activated	3.083	2.09e-07	CNN1,FN1,IL1RN,IL6,MMP3,RGS5,SPP1,THBS1,TIMP1,TNC
TRAF3IP2	-0.293	enzyme	Activated	3.085	2.04e-08	Ccl2,Ccl7,CCR2,CXCL10,CXCL16,IL6,ISG15,LCN2,MMP3,S100A8,Saa3,TNFRSF12A
streptozocin		chemical drug	Activated	3.089	5.27e-06	ATP1A2,CCL3L3,CYP2E1,FGFR4,FN1,GREM1,HMOX1,IL6,IRS1,LGALS3,LPL,MSR1,MYH6,PTPRN,SERPINE1,SLC7A8,SPP1
IL13	-0.102	cytokine	Activated	3.095	8.6e-30	Acp5,ALOX5AP,ARG1,BCL2A1,C3AR1,CCL2,Ccl2,CCL3L3,Ccl6,Ccl7,CCR5,CD14,CD72,CD80,Clca3a1/Clca3a2,CLEC10A,CLEC4E,CLEC7A,CTSB,CTSK,CTSS,CTSV,CXCL10,CYBB,F13A1,FCGR1A,FCGR2A,FCGR2B,FGG,GPNMB,GSN,HMOX1,HPSE,IL1RN,IL6,LILRB3,LIPA,MMP12,MMP13,MMP14,MMP3,MS4A4A,MUC5B,PDGFC,PLAU,PLIN2,S100A8,SERPINE1,SOCS3,SPP1,SPRR1A,TFEC,THBS1,TIMP1,TNFRSF1B,TNXB
CCR2	1.376	G-protein coupled receptor	Activated	3.11	1.4e-17	ARG1,C1QA,C1QB,C1QC,CCL2,Ccl2,CCL3L3,Ccl6,Ccl7,Ccl9,CCR1,CCR2,CCR5,CXCL10,CXCL13,F13A1,FN1,IL6,MMP13,TGFBI,THBS1,TIMP1,TNC,VCAN
platelet activating factor		chemical - endogenous mammalian	Activated	3.113	8.65e-14	CCL2,CDKN1A,FN1,IL6,ITGAM,ITGB2,MMP14,MMP8,PLA2G7,PLAU,PTAFR,SERPINE1,SOCS3,THBS1,TIMP1
TRPV4	0.402	ion channel	Activated	3.13	7.45e-11	Ccl2,CCL3L3,Ccl7,CXCL10,IL6,Saa3,SOCS3,THBS1,TIMP1,TLR2
OLR1	1.609	transmembrane receptor	Activated	3.13	2.46e-10	CCL2,CD68,CYBA,CYBB,FN1,HAS2,IL6,ITGAM,MMP3,OLR1,SPP1
lipid A		chemical toxicant	Activated	3.138	4.71e-11	CCL2,Ccl2,CCL3L3,CD14,CXCL10,FCGR1A,FCGR2B,IL6,MARCO,MSR1,OLR1,THBS1
hexachlorobenzene		chemical toxicant	Activated	3.138	2.53e-07	ANXA1,CD14,FCGR2A,GPNMB,LCN2,LGALS3,Ms4a6b,SPP1,TIMP1,TNFRSF12A
BID	0.112	other	Activated	3.148	1.15e-12	C3AR1,Ccl2,CTSB,CTSD,CTSK,CTSS,IL6,ITGAX,MMP12,TIMP1
ethionine		chemical toxicant	Activated	3.148	6.23e-09	ANXA1,CD14,GPNMB,LCN2,LGALS3,Ms4a6b,PLA1A,SPP1,TIMP1,TNFRSF12A
RAF1	0.095	kinase	Activated	3.154	0.000152	ANXA1,AREG,CDKN1A,IGFBP3,IL6,ITGAM,MKI67,MMP13,MMP3,NOP56,PLAU,RGS1,RPS2,TIMP1
EIF4E	0.424	translation regulator	Activated	3.16	4.03e-12	ARL11,BIRC5,C3AR1,Ccl2,Ccl9,CCR5,Cd52,CDKN1A,CLEC7A,CTSZ,CXCL16,CYBA,CYBB,EREG,Fcrls,FN1,GPR65,HMOX1,IFI16,Ifi27l2a/Ifi27l2b,MMP3,SLC11A1,TGFBI,TNC,UBE2C
USP22	0.148	peptidase	Activated	3.162	8.71e-10	BCL2A1,CD80,CDKN1A,CLEC5A,CSF2RB,CYBB,FCGR2A,FCGR2B,ITGAM,ITGB2,MSR1
FFAR3	0.141	G-protein coupled receptor	Activated	3.162	1.39e-05	CD80,CLEC6A,CXCL10,FCGR1A,FCGR2B,KLF15,LY86,Tlr13,TLR7,TLR8
DDX58	0.214	enzyme	Activated	3.183	4.93e-08	CCL2,Ccl2,CXCL10,IL6,IRF7,ISG15,Mx1,OAS1,RSAD2,SOCS3,SPP1
FOS	0.562	transcription regulator	Activated	3.184	7.99e-10	Acp5,C3AR1,CCL2,Ccl7,CCNA2,CCNG1,CD14,CD68,CFD,CTSB,CTSV,CXCL10,CXCL16,EREG,FN1,FOLR2,HAS2,HMOX1,HPGDS,IFI16,IL6,LGALS3,LPL,MMP13,MMP3,MMP8,Mt2,MYH6,PLAU,PTPRN,RGS4,S100A8,S100A9,SERPINE1,SOCS3,SPP1,TGFBI,TIMP1
hemozoin		chemical - endogenous non-mammalian	Activated	3.197	2.28e-12	CCL2,Ccl2,CCL3L3,CCR1,CCR2,CCR5,CD80,HMOX1,IL6,S100A8,S100A9
NFKBIA	0.293	transcription regulator	Activated	3.215	1.01e-21	Abcb1b,BCL2A1,CCL2,Ccl2,CCL3L3,Ccl7,Ccl9,CCNA2,CCR1,CD80,CDKN1A,CH25H,COL5A2,CTSB,CTSZ,CXCL10,CYBA,CYP7B1,EREG,FGFR4,FN1,GADD45G,HMOX1,HPSE,IFI16,IL1RN,IL6,IL7R,ISG15,LCN2,MMP13,MMP14,MMP3,Mt2,PLAU,PLD3,RGS4,RPS2,RRM1,S100A8,S100A9,Saa3,Slfn2,SOCS3,TCEAL9,TIMP1,TLR2,TNC,TNFRSF1B
STING1	1.248	other	Activated	3.217	8.35e-10	C15orf48,CD68,CXCL10,IFI16,Ifi27l2a/Ifi27l2b,IL6,IRF7,ISG15,LCN2,Mx1,OAS1,RSAD2
IFN alpha/beta		group	Activated	3.228	7.88e-10	CCL2,CCR2,CD80,CLEC10A,CXCL10,CXCL16,IFI16,Ifi27l2a/Ifi27l2b,IL6,IRF7,Mx1,RSAD2,TLR2,TLR7
ETS1	-0.231	transcription regulator	Activated	3.237	2.56e-12	APOC2,CCL2,Ccl2,CCNG1,CD14,CDKN1A,FCGR2A,FGFR4,FN1,HMOX1,HPSE,HSPA1A/HSPA1B,IL7R,ITGAM,ITGB2,LAIR1,MMP13,MMP3,MSR1,PF4,PLAU,Serpinb9b,SERPINE1,SLC7A11,SPP1
EDN1	0.523	cytokine	Activated	3.238	1.33e-11	ANXA1,AREG,BCL2A1,CCL2,CDK1,CYBB,EDNRB,EREG,FN1,FST,IL6,ITGAM,MMP13,MMP3,OLR1,PLAU,PTGER4,SERPINE1,SOCS3,THBS1,TIMP1,TNC,VCAN
FN1	1.563	enzyme	Activated	3.238	1.14e-06	BIRC5,CCL2,CDKN1A,CTSD,FN1,IL6,IRS1,ITGAM,MMP13,MMP14,MMP3,PLAU,SERPINE1,SOCS3,SPP1,THBS1,TLR2
ANGPT2	-0.06	growth factor	Activated	3.239	5.15e-07	Ccl2,CCL3L3,CD68,CDKN1A,CFB,CYBA,CYBB,FN1,HMOX1,HSPA1A/HSPA1B,IL6,ITGAX,MYH6,OLR1,PLAU,SERPINE1,THBS1,TNFRSF12A
LIF	0.656	cytokine	Activated	3.246	7.99e-10	AREG,Ccl2,CCL3L3,CCNA2,CDKN1A,CXCL10,EREG,FGG,FN1,HPSE,IFI16,IL6,KDR,LPL,MMP13,RGS4,SERPINA3,SOCS3,SPP1,SPRR1A,TIMP1,TNC
ELAVL1	0.011	other	Activated	3.256	1.4e-10	CDKN1A,CFD,Csprs (includes others),CTSS,FCGR2A,GLP1R,HMOX1,IFI16,IL6,KIF11,mir-8,MPEG1,NUF2,OAS1,OAS2,PBK,PLA2G7,PRC1,SLC7A11,Slfn2,Snora36b,TOP2A
PRL	0.147	cytokine	Activated	3.267	1.04e-07	CCL2,CDKN1A,CTSB,CTSD,CTSS,CTSV,CXCL10,EPSTI1,FN1,GPNMB,IGFBP3,IL6,IRF7,ISG15,MMP14,OAS1,OAS2,RSAD2,SERPINA3,SOCS3,SPP1,TIMP1
cigarette smoke		chemical toxicant	Activated	3.286	4.14e-12	Abcb1b,ADM,AKR1B10,AREG,BIRC5,CCL2,Ccl2,CCL3L3,CDKN1A,CLEC5A,CXCL10,CYP1A1,CYP2E1,FABP5,GADD45G,HMOX1,IL6,KDR,MMP12,MMP3,OAS1,OAS2,P2RY6,SERPINA3,SERPINE1,TIMP1,TREM2
tretinoin		chemical - endogenous mammalian	Activated	3.298	1.38e-24	Acp5,ADGRE1,ADM,ANXA1,AREG,ARG1,BCL2A1,BIRC5,BMP6,C1QA,C3AR1,CCL2,Ccl2,CCNA2,CCNG1,CCR1,CCR5,CD14,CD300C,CD53,CD63,CD68,CD80,CDKN1A,CDKN3,CHL1,Clca3a1/Clca3a2,COTL1,CTSB,CTSD,CTSK,CTSS,CXCL10,CYBB,CYP1A1,DHRS9,FABP5,FCER1G,FGFR4,FGG,FN1,FOLR2,FST,GNAO1,GREM1,GRIA1,HAS2,HMGCS2,HMOX1,IFI16,IGFBP3,IL6,INMT,IRS1,ISG15,ITGAM,ITGAX,ITGB2,KDR,KIF11,KLF15,LCN2,LGALS1,LIPA,LTF,MAFB,mir-181,MMP13,MMP14,MMP…
resiquimod		chemical drug	Activated	3.305	6.97e-15	BCL2A1,BMP6,C3AR1,CCL2,Ccl2,CCL3L3,Ccl7,Ccl9,CCR1,CLEC4E,CLEC7A,CXCL10,CXCL13,FCER1G,FCGR1A,FCGR2A,FCGR2B,IFI16,IL6,IRF7,ISG15,ITGAX,OAS1,OAS2,PLAU,SIGLEC1,SPP1,TLR2,TLR7,TLR8,TNIP3
ERBB2	-0.219	kinase	Activated	3.312	9.04e-10	AREG,BIRC5,CCL2,Ccl7,CCNA2,CCNB2,CDK1,CDKN1A,CDKN3,CLDN4,CLEC4E,COL5A2,CTSB,CXCL10,EPSTI1,EREG,FN1,HAS2,HSPA1A/HSPA1B,IGFBP3,IL6,KDR,LCN2,LGALS1,LGALS3,MKI67,MMP12,MMP13,MMP14,MMP3,NDC80,PLAU,PLIN2,PRC1,RNF149,RRM1,S100A6,SERPINA3,SERPINE1,TCEAL9,TGFBI,TGM1,THBS1,TNC,TOP2A,UBE2C,VCAN
Mek		group	Activated	3.316	1.88e-05	B4GALT6,BIRC5,Ccl2,CDKN1A,CXCL10,EREG,GDA,HAS2,IL6,KDR,MMP13,MMP14,SEMA6A,SERPINE1,THBS1,TOP2A
SAMSN1	0.448	other	Activated	3.317	4.57e-06	CCL3L3,Ccl7,CXCL10,IL6,IRF7,ISG15,MARCO,PLA1A,RSAD2,SLFN12L,SOCS3
S100A8	1.451	other	Activated	3.326	4.8e-15	ACSS1,ADAMTS4,AREG,C1QB,CCL2,Ccl2,Ccl7,CD80,CSF2RB,CXCL10,FCGR2A,HMOX1,IL6,ISG15,ITGAM,KLF15,MMP13,MMP14,MMP3,OLR1,PDGFC,PLAU,S100A8,Saa3,SOCS3,VCAN
SPI1	0.767	transcription regulator	Activated	3.339	3.34e-16	Acp5,ADGRE1,C1QC,C3AR1,CCNA2,CCNB2,CD14,CD180,CD68,CD72,CDK1,CDKN1A,CSF2RB,CTSK,CTSS,CXCL10,CYBB,FCER1G,FCGR2B,IL1RN,IL7R,IRF7,ISG15,ITGAM,ITGB2,LILRB3,LTF,mir-8,RSAD2,SPP1,TFEC,TLR2
IL6R	-0.42	transmembrane receptor	Activated	3.343	4.12e-08	CCL2,CDKN1A,CXCL10,FN1,GREM1,IL6,LCN2,MMP13,MMP3,SERPINA3,SOCS3,TIMP1
allopurinol		chemical drug	Activated	3.345	6.65e-10	ANXA1,CD14,CLDN4,CXCL10,FCGR2A,GPNMB,HMOX1,LCN2,LGALS3,Ms4a6b,PLA1A,SPP1,STING1,TIMP1,TNFRSF12A
AGN194204		chemical drug	Activated	3.348	1.86e-09	BCL2A1,CA3,CCL3L3,Ccl9,CCNA2,CDK1,CDKN1A,COTL1,CYP7B1,GPR65,H1-2,H2AX,IL7R,ITGB2,LGALS1,LILRB4,LPL,MKI67,PLIN2,PRC1,SPP1,TIMP1,TOP2A
IFNA1/IFNA13		cytokine	Activated	3.361	1.22e-10	CD80,CXCL10,CYP1A1,CYP2E1,IRF7,ISG15,Mx1,OAS1,OAS2,RSAD2,SIGLEC1,ZBP1
chrysotile asbestos		chemical toxicant	Activated	3.373	1.91e-13	Ccl6,Ccl9,CCNB2,CTSK,CTSS,CTSZ,IL6,ITGAX,MMP12,MMP13,MMP3,TIMP1
carbon tetrachloride		chemical toxicant	Activated	3.379	1.91e-11	ADGRE1,CA3,Ccl2,CCL3L3,CCR1,CCR5,CDKN1A,CXCL10,CYP1A1,CYP2E1,FGFR4,FGG,FN1,HMOX1,IL6,KDR,MMP13,Mt2,PDGFC,PTAFR,S100A6,SPP1,TIMP1,TNFRSF12A
IL2	0.094	cytokine	Activated	3.392	5.52e-09	ANXA1,AREG,BCL2A1,CCL2,Ccl2,CCL3L3,Ccl9,CCNG1,CCR1,CCR2,CCR5,CD80,CDKN1A,CSF2RB,CTPS1,CXCL10,CYP1A1,CYTH4,FCER1G,FCGR3A/FCGR3B,GADD45G,H1-2,HSPA1A/HSPA1B,IL6,IL7R,LGALS12,LILRB4,MKI67,PDGFC,RPL10,S100A8,SOCS3,SPP1,TIMP1,TLR2,TNFRSF12A,TNFRSF1B
paraquat		chemical toxicant	Activated	3.41	8.61e-06	ADGRE1,CYBB,FN1,HMOX1,IL6,ITGAM,MMP12,MMP3,MMP8,Mt2,SLC7A11,TIMP1
beta-estradiol		chemical - endogenous mammalian	Activated	3.414	1.06e-20	ACTC1,ADAMTS4,ADM,ANXA1,AREG,ARG1,ARHGEF15,BCL2A1,BIRC5,C15orf48,CCL2,Ccl2,CCL3L3,CCNA2,CCNB2,CCNG1,CCR1,CCR2,CCR5,CD14,CDK1,CDKN1A,CDKN3,CFB,CLDN4,CLEC4D,CNN1,CSTB,CTPS1,CTSB,CTSD,CTSK,CXCL10,CXCL13,CYBB,CYP1A1,CYP2E1,CYP4F8,CYTH4,DHRS9,EREG,F7,FABP5,FCGR2A,FCGR2B,FMO1,FN1,FST,GADD45G,GREM1,GRIA1,GUCY1A1,Hamp/Hamp2,HAS2,HMOX1,IFI30,IGFBP3,IGSF6,IL6,IL7R,IRF7,IRS1,ISG15,ITGB2,KDR,KYNU,LCN2,LGALS3…
SRC	-0.019	kinase	Activated	3.417	7.14e-06	CCL2,CDK1,CDKN1A,CTSB,CTSV,CXCL10,CYP1A1,FN1,HAS2,IL6,PLAU,SPP1
IFNA2		cytokine	Activated	3.434	1.89e-08	ADGRE1,ANXA1,BIRC5,CCL2,CDKN1A,CXCL10,CXCL13,IFI16,IL6,IRF7,ISG15,LILRB4,OAS1,OAS2,PHF11,PTAFR,RSAD2,SLC15A3,SOCS3,ZBP1
phenylbutazone		chemical drug	Activated	3.441	2.72e-09	ANXA1,CLDN4,FCGR2A,GPNMB,LCN2,LGALS3,Ms4a6b,PLA1A,SPP1,STING1,TIMP1,TNFRSF12A
lomustine		chemical drug	Activated	3.464	5.21e-09	ANXA1,CD14,CLDN4,FCGR2A,GPNMB,LCN2,LGALS3,PLA1A,SPP1,STING1,TIMP1,TNFRSF12A
gentamicin C		chemical drug	Activated	3.464	6.41e-09	ANXA1,CD14,CLDN4,FCGR2A,GPNMB,LCN2,LGALS3,Ms4a6b,PLA1A,SPP1,TIMP1,TNFRSF12A
PLX5622		chemical drug	Activated	3.464	1.91e-08	Ccl2,CCL3L3,Ccl6,Ccl7,Ccl9,CCR1,CCR2,CXCL10,CXCL13,GUSB,IL1RN,PF4,SPP1
PTGS2	0.302	enzyme	Activated	3.478	1.37e-12	Abcb1b,ANXA1,AREG,CCL2,Ccl2,CCL3L3,CD68,CDKN1A,CTSD,CTSK,CXCL10,FN1,GRIA1,IGFBP3,IL6,KDR,LPL,MKI67,MMP14,MSR1,NR4A2,PTGER4,TNFRSF12A
thioacetamide		chemical toxicant	Activated	3.5	3.96e-11	ANXA1,B4GALT6,CD14,CLDN4,CYP1A1,EDNRB,FCGR2A,GATM,GPNMB,IGFBP3,IL6,KDR,LCN2,LGALS1,LGALS3,MMP13,MMP14,Ms4a6b,PLA1A,RRM1,SLC7A11,SPP1,SPRR1A,STING1,TIMP1,TNFRSF12A
IRF3	-0.192	transcription regulator	Activated	3.518	1.23e-10	CCL2,Ccl2,CCL3L3,CXCL10,FCGR1A,FN1,FST,Hamp/Hamp2,IFI16,Ifi27l2a/Ifi27l2b,IL6,IRF7,ISG15,LCN2,MMP3,Mx1,OAS1,OAS2,PHF11,RSAD2,ZBP1
NFAT5	-0.394	transcription regulator	Activated	3.523	1.79e-09	AREG,BCL2A1,CCL2,Ccl2,CCN4,CCR1,CXCL10,CXCL16,CYBB,EREG,IL1RN,IL6,LCN2,SPP1,TLR2
enterotoxin B		biologic drug	Activated	3.543	5.8e-09	CCL2,Ccl2,CCL3L3,Ccl7,Ccl9,CD80,CSF2RB,CXCL10,CXCL13,GPNMB,IL6,RSAD2,SERPINA3
IFNAR1	0.469	transmembrane receptor	Activated	3.564	3.24e-15	ARG1,CCL3L3,Ccl9,CH25H,CLEC4D,CLEC4E,CXCL10,CXCL13,F7,IFI16,IL6,IRF7,ISG15,Mx1,OAS1,OAS2,PLA2G7,RSAD2,SERPINE1,SLFN12L,SOCS3,THBS1,TLR2,TLR7
IL33	1.001	cytokine	Activated	3.565	2.3e-14	AREG,ARG1,BCL2A1,CCL2,Ccl2,CCL3L3,Ccl7,CCR2,Cd52,CD72,CD80,CLEC4E,CXCL10,CXCL16,HMOX1,IL6,ITGAM,MSR1,MUC5B,PLIN2,S100A8,SLC11A1,SLC7A11,SOCS3,TFEC,TIMP1,TLR2,TNFRSF1B,TUBB6
peptidoglycan		chemical - endogenous non-mammalian	Activated	3.565	1.41e-13	BCL2A1,CCL2,Ccl2,CCL3L3,CCR5,CD80,CXCL10,CXCL16,HMOX1,IL1RN,IL6,ITGB2,MMP13,MMP3,S100A8,S100A9,Tlr13,TLR2,TLR7
triamterene		chemical drug	Activated	3.575	8.04e-10	ANXA1,CD14,CLDN4,FCGR2A,GPNMB,LCN2,LGALS3,Ms4a6b,PLA1A,SPP1,STING1,TIMP1,TNFRSF12A
fenamic acid		chemical reagent	Activated	3.575	1.51e-09	ANXA1,CD14,CLDN4,FCGR2A,GPNMB,LCN2,LGALS3,Ms4a6b,PLA1A,SPP1,STING1,TIMP1,TNFRSF12A
2-bromoethylamine		chemical reagent	Activated	3.582	1.69e-11	ANXA1,CD14,CLDN4,FCGR2A,GPNMB,LCN2,LGALS3,Ms4a6b,PLA1A,SPP1,STING1,TIMP1,TNFRSF12A
Hbb-b2	-0.193	other	Activated	3.606	6.32e-13	C1QA,Ccl2,Ccl7,CCR2,CCR5,CLEC7A,CXCL10,CYBA,CYBB,FN1,Hamp/Hamp2,ITGAM,LY86,TLR2
Hbb-b1		transporter	Activated	3.606	1.57e-08	C1QA,Ccl2,Ccl7,CCR2,CCR5,CLEC7A,CXCL10,CYBA,CYBB,FN1,Hamp/Hamp2,ITGAM,LY86,TLR2
FGF2	0.526	growth factor	Activated	3.612	3.36e-13	ADM,AKR1B10,AREG,BIRC5,CCL2,Ccl2,CCN4,CDKN1A,CTSK,EDNRB,EREG,FGFR4,FN1,GPNMB,GREM1,GRIA1,HAS2,HPSE,IGFBP3,IL6,IRS1,KDR,MKI67,MMP13,MMP3,NR4A2,PDGFC,PLAU,S100A8,SERPINE1,SOCS3,SPP1,THBS1,TIMP1,TNFRSF12A,TOP2A
IL5	-0.196	cytokine	Activated	3.621	0.00106	AREG,CCL2,CCR1,CCR2,CCR5,CD63,CD80,CDKN1A,CSF2RB,FCGR2B,GADD45G,IFI30,IRF7,ITGAM,S100A6
CEBPB	0.342	transcription regulator	Activated	3.628	6.02e-19	Abcb1b,ADM,AKR1B10,ALOX5AP,ARG1,BCL2A1,CCL2,Ccl2,CCL3L3,CCNA2,CCNB2,CCR5,CD14,CDKN1A,CFD,CLEC4E,COL5A2,CXCL10,CYP1A1,CYP2E1,F7,Hamp/Hamp2,HAS2,IGFBP3,IL1RN,IL6,INMT,IRF7,IRS1,LCN2,LGMN,MMP13,MMP3,MSR1,Mx1,Orm1 (includes others),RGS4,Saa3,SERPINE1,SOCS3,SPP1,SPRR1A,TLR8,VCAN
SPP1	3.31	cytokine	Activated	3.637	3.43e-09	Acp5,ARG1,CCL2,Ccl2,CCL3L3,CCR2,CDKN1A,FN1,HAS2,HMOX1,IL6,MMP13,MMP14,NRCAM,PLAU,S100A6,SERPINE1,SPP1,TIMP1
Ifnar		group	Activated	3.648	1.04e-11	CCL2,Ccl2,Ccl7,CXCL10,FCER1G,IFI16,IL6,IRF7,ISG15,Mx1,OAS1,OAS2,RSAD2,SPP1,TLR2,TLR7,ZBP1
Salmonella enterica serotype abortus equi lipopolysaccharide		chemical toxicant	Activated	3.649	6.87e-08	AREG,Ccl2,CCL3L3,CDK1,CFB,EREG,IL6,IL7R,ISG15,NR4A2,PLA1A,PLAU,RGS1,SLAMF7,SOCS3,THBS1,TNIP3
cytokine		group	Activated	3.652	1.57e-08	ADAMTS4,BIRC5,CCL2,CD80,HMOX1,IL6,MMP12,MMP13,MMP3,Mx1,PLAU,SERPINE1,SOCS3,TIMP1,TLR2,TNFRSF1B
IRF7	1.556	transcription regulator	Activated	3.661	1.7e-09	Ccl2,CD80,CXCL10,FCGR1A,Hamp/Hamp2,IFI16,IRF7,ISG15,ITGAM,ITGAX,Mx1,OAS1,OAS2,PHF11,RSAD2,S100A8,TLR8,ZBP1
Jnk		group	Activated	3.692	3.52e-08	BIRC5,CCL2,Ccl2,CD80,CLEC10A,FN1,GRIA1,HMOX1,IL6,MMP12,MMP13,MMP14,MMP3,PLAU,SERPINE1,SOCS3,TIMP1,TNFRSF12A,VCAN
PTGER2	0.548	G-protein coupled receptor	Activated	3.693	7.58e-20	ADGRE1,AREG,CCNA2,CCNB2,CDKN3,CLEC4D,CLEC6A,DEPDC1,ECT2,H2AC7,H2AX,IL6,KIF11,MKI67,NUF2,NUSAP1,PBK,PRC1,RACGAP1,SERPINE1,SPP1,Stfa2/Stfa2l1,THBS1,TIMP1,TPX2
vancomycin		biologic drug	Activated	3.7	3.89e-09	ANXA1,CD14,CLDN4,FCGR2A,GPNMB,HMOX1,LCN2,LGALS3,Ms4a6b,PLA1A,SPP1,STING1,TIMP1,TNFRSF12A
EGR1	0.301	transcription regulator	Activated	3.724	4.12e-14	Abcb1b,ALOX5AP,AREG,CCL2,Ccl2,CCL3L3,Ccl6,Ccl7,Ccl9,CCR1,CCR2,CDKN1A,EREG,FN1,GRIA1,HMOX1,HPSE,ITGAM,MMP14,PDGFC,PF4,PLAU,SERPINE1,SPP1,THBS1,TIMP1
MTPN	0.582	transcription regulator	Activated	3.729	3.3e-09	ANXA1,BCL2A1,Ccl2,CCNA2,CCNB2,CDK1,COL8A1,FN1,IL6,MMP3,S100A6,S100A8,SERPINE1,SPP1
aldosterone		chemical - endogenous mammalian	Activated	3.771	5.83e-09	ADM,CCL2,Ccl2,CD68,CYBA,CYBB,FN1,HAS2,IL6,IRS1,KDR,LCN2,LPL,OLR1,SERPINE1,SPP1,TIMP1
NFKB1	0.038	transcription regulator	Activated	3.787	3.65e-16	Abcb1b,ARG1,BCL2A1,CCL2,Ccl2,CCL3L3,CD80,CDKN1A,CFB,CTSB,CXCL10,CYBB,FGG,FN1,GNAO1,HAS2,HMOX1,IFI16,IGFBP3,IL1RN,IL6,ISG15,LGALS1,MMP13,MMP3,MSR1,Mx1,NR4A2,PLAU,PTAFR,RGS1,Saa3,TLR2
OSM	0.363	cytokine	Activated	3.802	2.25e-15	ADAMTS4,AKR1B10,ANXA1,ARG1,CCL2,Ccl2,CCL27,CDKN1A,CH25H,CLDN4,COL8A1,CTSV,CXCL10,CXCL13,ECM2,FN1,GADD45G,GPNMB,Hamp/Hamp2,HMOX1,IGFBP3,IL6,IRF7,IRS1,LCN2,LRG1,MMP13,MMP3,MMP8,Mt2,OAS1,PLAU,S100A8,S100A9,SERPINA3,SERPINE1,SLC7A8,SOCS3,SPP1,SYNE1,TIMP1,TLR2,TNC,TOP2A,TPX2
SP1	-0.276	transcription regulator	Activated	3.825	1.33e-12	Abcb1b,ACSS1,BIRC5,CCL2,Ccl2,CCNA2,CDK1,CDKN1A,COL8A1,CTSD,CXCL10,CYP7B1,DIAPH3,EREG,F7,FGFR4,FN1,FOLR2,GRIA1,HAS2,HMOX1,HPSE,IGFBP3,ITGAM,ITGAX,KDR,LAMA1,LIPA,LPL,mir-8,MMP14,MUC5B,PDGFC,PLAU,PTGER4,SERPINE1,SLC11A1,SPP1,TGM1,TIMP1,TLR2,TNC
ERK1/2		group	Activated	3.83	1.82e-15	Abcb1b,AKR1B10,AREG,BCL2A1,CCL2,Ccl2,CCL27,CCL3L3,CCN4,CD80,CDK1,CDKN1A,CTSB,CTSV,CXCL10,CYBB,FN1,HAS2,IGFBP3,IL6,MMP12,MMP13,MMP3,MUC5B,PLAU,PTGER4,S100A6,Saa3,SERPINE1,SOCS3,SPP1,TIMP1,VCAN
puromycin aminonucleoside		chemical reagent	Activated	3.845	4.47e-09	ANXA1,CD14,CLDN4,CTSV,CYBA,CYBB,FCGR2A,GPNMB,LCN2,LGALS3,Ms4a6b,PLA1A,SPP1,TIMP1,TNFRSF12A
F2	-0.074	peptidase	Activated	3.852	3.61e-11	CCL2,Ccl2,Ccl9,CCNA2,CD63,CD68,CDKN1A,COTL1,CTPS1,CXCL10,CXCL13,CYBB,DHRS9,EDNRB,EREG,F7,FN1,GREM1,HAS2,HMOX1,IL6,KDR,SERPINE1,THBS1,TNFRSF12A,TNNT2
S100A9	1.047	other	Activated	3.869	7.9e-13	ACSS1,ADAMTS4,AREG,C1QB,Ccl2,Ccl7,CSF2RB,CXCL10,FCGR2A,IL6,ISG15,ITGAM,KLF15,MMP13,MMP14,MMP3,OLR1,PDGFC,PLAU,S100A8,S100A9,SOCS3,VCAN
Ifn		group	Activated	3.895	1.53e-11	CD80,CH25H,CXCL10,IFI16,IRF7,ISG15,LCN2,Mx1,OAS2,PTAFR,RSAD2,S100A8,SERPINE1,SPP1,TLR2,TLR7,ZBP1
LDL		complex	Activated	3.919	7.6e-22	BCL2A1,CCL2,Ccl2,Ccl7,CCR2,CD68,CD80,CDK1,CDKN1A,CTSK,CXCL10,CXCL13,CYBB,EDNRB,FCGR1A,FCGR2B,HAS2,HMOX1,IGFBP3,IL1RN,IL6,IRF7,MKI67,MMP12,MMP14,MMP3,MMP8,MSR1,NR4A2,OLR1,PLAU,PLIN2,PTAFR,S100A8,SERPINE1,SIGLEC1,SOCS3,TLR2
CEBPA	0.254	transcription regulator	Activated	3.92	5.94e-22	Abcb1b,AKR1B10,ALOX5AP,ANXA1,ARG1,BCL2A1,C3AR1,Ccl9,CCNA2,CCNB2,CCR1,CD14,CDKN1A,CFD,CTSK,FCGR1A,GLRX,Hamp/Hamp2,HAS2,HMOX1,IGFBP3,IL1RN,IL6,IRS1,ISG15,ITGAM,ITGAX,LCN2,LGALS1,LPL,LTF,mir-181,MMP13,MMP8,NR4A2,OAS2,OLR1,Orm1 (includes others),PLIN2,PTAFR,S100A8,S100A9,Saa3,SERPINE1,SOCS3,SPP1,SPRR1A,THBS1,VCAN
TICAM1	-0.29	other	Activated	3.92	4.45e-12	CCL2,Ccl2,CCL3L3,CD80,CFB,CH25H,CXCL10,CXCL13,EDNRB,IFI16,IL6,IRF7,ISG15,MKI67,Mx1,RSAD2,SERPINE1,SOCS3,TFEC,TLR2
IL17A	0.366	cytokine	Activated	3.933	6.23e-21	AREG,BCL2A1,BIRC5,CCL2,Ccl2,CCL27,Ccl7,CD14,CD68,COTL1,CTSK,CXCL10,CXCL13,CYP7B1,EREG,FMO1,GUSB,HEXB,IL1RN,IL6,ISG15,LCN2,LPL,mir-8,MMP13,MMP3,MMP8,PLAU,S100A8,S100A9,Saa3,SOCS3,TIMP1,TLR2,TNC,TNFRSF1B
STAT1	0.397	transcription regulator	Activated	3.974	2.96e-18	APOC2,ARG1,BIRC5,CCL2,Ccl2,CCL3L3,CD14,CDKN1A,CFB,CH25H,CTSS,CXCL10,CYP2E1,EPSTI1,FCER1G,FCGR1A,FCGR2B,IFI16,IFI30,IL6,IRF7,ISG15,ITGAX,LCN2,Mx1,OAS1,OAS2,PDGFC,PF4,RSAD2,SERPINA3,SLFN12L,SLFN13,Slfn2,SOCS3,SPRR1A,TLR8,Wfdc17,ZBP1
TLR7	1.126	transmembrane receptor	Activated	3.995	6.43e-11	Abi3bp,ACTC1,BCL2A1,CCL2,Ccl2,Ccl7,CD80,CDKN1A,CXCL10,CXCL13,FCER1G,IL6,IRF7,ISG15,ITGAX,Mx1,OAS2,PHF11,PLAU,RGS4,RSAD2,TLR7
LEP	-0.081	growth factor	Activated	4.001	4.71e-16	ADGRE1,BCL2A1,BIRC5,CA3,CCL2,Ccl2,CCL3L3,CCNA2,CD14,CD63,CD68,CDKN1A,CFD,CTSV,CXCL10,CYBA,CYBB,CYP2E1,GRIA1,IGFBP3,IL1RN,IL6,IRS1,ITGAM,ITGAX,LIPA,LPL,mir-8,MMP12,MMP13,MMP14,MMP19,MMP3,MUC5B,PLIN2,Pln,Saa3,SERPINE1,SOCS3,SPP1,THBS1,TIMP1
RETNLB	0.109	other	Activated	4.013	3.36e-16	CCL2,Ccl2,CCL3L3,Ccl9,CCN4,CCR1,CCR2,CCR5,FN1,IL6,IRS1,KLF15,LAMA1,MMP12,PLA1A,Saa3,TIMP1,Tlr13,TLR2,UBE2C
TLR9	0.603	transmembrane receptor	Activated	4.021	9.73e-17	ADAMTS4,Ccl2,CCL3L3,Ccl7,CCNA2,CD80,CXCL10,Hamp/Hamp2,HMOX1,IFI16,IL6,IRF7,ISG15,LAIR1,LCN2,LILRB4,Mx1,OAS2,RAB7B,RSAD2,S100A8,Saa3,SERPINE1,SOCS3,Stfa2/Stfa2l1,TIMP1,TLR7,TNC,TNFRSF1B,Wfdc17
imiquimod		chemical drug	Activated	4.024	1.05e-12	Ccl2,CD80,CXCL17,HHIP,HMOX1,IL1RN,IL6,IRF7,ISG15,ITGB2,LCN2,OAS1,RSAD2,S100A9,SOCS3,TARM1,TLR7
IFN Beta		group	Activated	4.035	3.46e-11	C3AR1,CD80,CDKN1A,CXCL10,CYP2E1,FN1,IFI16,IL1RN,IL6,IRF7,ISG15,Mt2,Mx1,OAS1,OAS2,RSAD2,TNFSF18,ZBP1
salmonella minnesota R595 lipopolysaccharides		chemical - endogenous non-mammalian	Activated	4.051	3.24e-14	CCL2,Ccl2,CCL3L3,Ccl6,Ccl7,CD80,CH25H,CXCL10,CXCL13,EDNRB,IL6,ISG15,MKI67,RSAD2,SERPINE1,SLFN12L,SLFN13,Slfn2,SOCS3,TFEC,TLR2
TGM2	0.163	enzyme	Activated	4.071	9e-08	BCL2A1,CCL2,CD300C,CXCL10,FCER1G,FN1,IL6,ITGAM,ITGAX,MAFB,MMP8,OAS1,OAS2,RTKN2,S100A8,SLAMF7,SPP1,THBS1,TYROBP
Ige		complex	Activated	4.077	1.33e-18	Abcb1b,ANXA1,AREG,ARG1,BCL2A1,BIRC5,CCL2,Ccl2,CCL3L3,Ccl7,Ccl9,CCR5,CD53,CD80,CDKN1A,CLEC4E,CLEC7A,CTSK,CXCL16,FCER1G,FCGR1A,FCGR2B,GSN,HMOX1,IL6,IL7R,ITGAX,RAB7B,RSAD2,SLC11A1,SLC37A2,SOCS3,SPP1,TLR2,TLR7,TNC,TNFRSF12A,TNFRSF1B,Tnfrsf22/Tnfrsf23,TUBB6
CG		complex	Activated	4.09	2.7e-08	Abcb1b,ADM,AKR1B10,AREG,CCL2,Ccl2,Ccl7,CDKN1A,CTSV,CXCL10,EREG,FABP5,FST,HAS2,HPSE,IGFBP3,IL6,MMP19,PLAU,RGS4,S100A6,Saa3,SPP1,SPRR1A,TIMP1,TNFRSF12A,VCAN
CSF3	0.108	cytokine	Activated	4.102	2.01e-16	ADGRE1,ARG1,BIRC5,C3AR1,Ccl2,CCL3L3,CD14,CD177,CD300LD,CD300LF,CTSD,CYBB,FCGR1A,GADD45G,HMOX1,IL1RN,IL6,ITGAM,ITGB2,LCN2,LTF,MMP8,RGS1,SOCS3,TLR2,TLR8,TNFRSF1B
diethylstilbestrol		chemical drug	Activated	4.108	4.68e-12	Aox3,AREG,C1QA,CCNA2,CCNB2,CD14,CDKN1A,CFB,CTSK,EREG,FMO1,GLRX,GREM1,IGFBP3,IGSF6,IRS1,KDR,KIF11,LGALS1,LTF,MAFB,MKI67,MMP8,RGS4,RGS5,S100A6,S100A8,SCN7A,TGFBI,TOP2A
Akt		group	Activated	4.11	1.4e-09	ADM,BCL2A1,BIRC5,CCL2,Ccl2,CDKN1A,CTSD,CXCL10,FN1,HMOX1,IL6,IL7R,LCN2,LPL,MMP12,MMP14,PTAFR,PTGER4,SERPINE1,SOCS3,SPP1,THBS1,TLR2,TNC,VCAN
E. coli serotype 0127B8 lipopolysaccharide		chemical - endogenous non-mammalian	Activated	4.111	1.08e-09	ACSS1,ANXA1,CCL2,Ccl2,Ccl7,CD14,CXCL10,CXCL16,EDNRB,GNAO1,HAS2,HMOX1,IL6,LCN2,LGALS3,MMP3,P2RY6,RSAD2,SLC7A11,SOCS3,TLR2
IKBKG	-0.162	kinase	Activated	4.114	2.2e-13	Ccl2,Ccl9,CCR1,CH25H,CTSB,CTSZ,CXCL10,CYP7B1,EREG,IFI16,IL1RN,IL6,IRF7,ISG15,LCN2,Mt2,MYH6,PLD3,Saa3,Slfn2,SOCS3,TNFRSF1B
CpG oligonucleotide		chemical drug	Activated	4.118	1.37e-14	BCL2A1,BIRC5,CCL3L3,Ccl7,Ccl9,CCNB2,CCR1,CD14,CD63,CD80,CLEC4D,CLEC4E,CXCL10,FCGR2B,IL6,ITGAX,MARCO,MMP13,MSR1,OLR1,SERPINE1,THBS1,TLR2
palmitic acid		chemical - endogenous mammalian	Activated	4.127	4.38e-14	CCL2,Ccl2,CCL3L3,CD68,CDKN1A,CTSB,CXCL10,CYBA,CYBB,FN1,FOLR2,GLP1R,HMOX1,IL1RN,IL6,IRS1,LCN2,MAFB,Mt2,NR4A2,OLR1,Orm1 (includes others),PLIN2,Saa3,SERPINE1,SOCS3,STING1,TLR2
P38 MAPK		group	Activated	4.145	2.69e-16	BCL2A1,BIRC5,CCL2,Ccl2,CCL3L3,CD80,CDKN1A,CTSK,CXCL10,CYBB,CYP1A1,EDNRB,FN1,FST,HAS2,HMOX1,IL1RN,IL6,IRF7,ITGAM,ITGB2,KLF15,MMP12,MMP13,MMP3,MUC5B,PLA2G7,PLAU,RAB7B,RGS4,SERPINE1,SOCS3,SPP1,THBS1,TIMP1,TLR2,TOP2A
mir-223		microRNA	Activated	4.146	1.47e-12	APOBEC1,BST1,C15orf48,CD180,CLEC4E,FAM20C,GPR65,HPGDS,IFI16,IL1RN,IL6,LPL,MMP13,MMP8,Mt2,S100A6,S100A9,Stfa2/Stfa2l1,TGFBI,Tlr13,TLR7
10E,12Z-octadecadienoic acid		chemical - endogenous mammalian	Activated	4.226	8.13e-12	ARHGEF15,ATP6V0D2,BIRC5,CA3,CCL2,Ccl2,CDKN3,CFD,CLEC12A,IGFBP3,IL1RN,IL6,LGALS12,MMP12,NDC80,NR4A2,PBK,PLIN2,RGS1,TM4SF19,TNIP3,TREM2
IL1A	0.829	cytokine	Activated	4.283	4.85e-17	Acp5,ADAMTS4,CCL2,Ccl2,CCL27,CCR2,CD80,CDKN1A,CTSK,CXCL10,CYP1A1,CYP2E1,Hamp/Hamp2,HMOX1,IL1RN,IL6,LCN2,MMP12,MMP13,MMP14,MMP3,P2RY6,PLAU,S100A8,S100A9,Saa3,SERPINA3,SERPINE1,SPP1,TIMP1,TLR2
CD44	0.624	other	Activated	4.29	3.79e-15	ADGRE1,BIRC5,Ccl2,Ccl7,CCNG1,CCR2,CCR5,CD63,CDKN1A,CLEC5A,CLEC7A,COL5A2,CTSK,FN1,IL1RN,IL6,ITGAX,LGALS1,LGALS3,MMP12,MMP13,MMP14,MMP3,MMP8,PLAU,SPP1,THBS1,TLR8
PI3K (complex)		complex	Activated	4.336	1.15e-11	ALOX5AP,BCL2A1,BIRC5,CCL2,Ccl2,CCR1,CDKN1A,CTSD,CXCL10,CYBB,FABP5,FN1,HMOX1,IL1RN,IL6,IL7R,ITGAM,ITGB2,KDR,LCN2,MMP12,MMP13,MMP14,NR4A2,SERPINE1,SOCS3,SPP1,THBS1
APP	-0.138	other	Activated	4.35	4.75e-14	ADAMTS4,ARG1,ARL11,ATP1A2,BMP6,CCL2,Ccl2,CCL3L3,Ccl7,CCR5,CD68,CDK1,CDKN1A,CH25H,CSF2RB,CTSB,CTSD,CTSV,CXCL10,CYBB,FCGR1A,FCGR2A,FCGR2B,FN1,GNAO1,GRIA1,H2AC7,HMOX1,HSPA1A/HSPA1B,IFI16,IL6,IRF7,ITGAM,KYNU,LGALS3,MAFB,MMP12,MMP13,MMP14,MMP3,MMP8,MSR1,Mx1,NR1D1,NR4A2,OLR1,PLAU,RSAD2,S100A8,SERPINE1,SLC7A11,SLFN13,SOCS3,TLR2,TLR7,TLR8,TOP2A,TUBB6,VCAN
hydrogen peroxide		chemical - endogenous mammalian	Activated	4.372	3.27e-13	Abcb1b,BCL2A1,BIRC5,CCL2,Ccl2,CCL3L3,CCNA2,CCR2,CCR5,CD63,CD68,CD80,CDK1,CDKN1A,CFD,CTSB,CTSD,CTSS,CYP1A1,DDIAS,FN1,GLRX,H2AX,HMGCS2,HMOX1,IL6,IRS1,KDR,LCN2,mir-181,MMP13,MMP3,MMP8,MSR1,NDC80,PTGER4,SERPINE1,SLC7A11,SPP1
IKBKB	-0.165	kinase	Activated	4.393	3.58e-18	Acp5,CCL2,Ccl2,CCL3L3,Ccl9,CCNA2,CCR1,CDKN1A,CH25H,CTSB,CTSK,CTSZ,CXCL10,CXCL16,CYBA,CYP7B1,ECT2,EREG,H2AX,HMOX1,IFI16,IL1RN,IL6,ISG15,LCN2,MMP13,MMP3,Mt2,PLAU,PLD3,Saa3,Slfn2,SOCS3,TNC,TNFRSF1B,VCAN
E. coli B5 lipopolysaccharide		chemical - endogenous non-mammalian	Activated	4.448	4.43e-10	CCL2,Ccl2,CCL3L3,Ccl6,Ccl7,Ccl9,CCR1,CCR5,CDKN1A,CXCL10,CXCL13,CYBB,FMO1,Hamp/Hamp2,HMOX1,IL6,IL7R,MMP13,PF4,SERPINE1,SOCS3,SPP1,THBS1,TLR2,TLR7
trinitrobenzenesulfonic acid		chemical reagent	Activated	4.815	1.75e-19	BST1,Ccl2,CCL3L3,Ccl7,Ccl9,CCR1,CCR5,CD68,CLEC4D,CLEC4E,CXCL10,IL6,ITGAM,LCN2,MMP12,MMP13,MMP3,PF4,S100A8,S100A9,Saa3,SOCS3,TIMP1,TNFRSF12A
cholesterol		chemical - endogenous mammalian	Activated	4.88	3.35e-22	ADGRE1,AREG,C15orf48,C1QC,CCL2,Ccl2,Ccl7,CCR2,CCR5,CD14,CD68,CLEC5A,CNN1,CTSK,CXCL10,CYBB,CYP7B1,FABP5,FCGR2B,FN1,IL1RN,IL6,ITGAM,ITGAX,LGALS3,LPL,MMP14,MMP8,MPEG1,NR4A2,Orm1 (includes others),S100A8,Saa3,SOCS3,THBS1,TIMP1,TM4SF19
cisplatin		chemical drug	Activated	4.907	2.4e-10	Abcb1b,ADGRE1,ANXA1,BCL2A1,BIRC5,CCL2,Ccl2,CCNG1,CCR1,CCR5,CD14,CD53,CD68,CDK1,CDKN1A,CLDN4,CTSB,CXCL10,CYBB,DESI2,FCGR2A,FN1,GPNMB,GRIA1,H2AX,HMOX1,IGFBP3,IL6,KLF12,LCN2,LGALS3,LILRB4,LIPA,mir-181,mir-8,Ms4a6b,PLA1A,SERPINE1,SOCS3,SPP1,THBS1,TIMP1,TNFRSF12A,TNFRSF1B,TOP2A
cardiotoxin		chemical - other	Activated	4.914	1.09e-22	APOC2,BIRC5,CCL2,Ccl2,CCL3L3,Ccl6,Ccl7,Ccl9,CCNA2,CCR1,CCR2,CCR5,CD180,CSF2RB,CTSV,EDNRB,IL1RN,IL6,IL7R,ITGAM,ITGB2,LCN2,LRG1,LY86,MMP12,MMP13,MMP3,MS4A8,S100A8,S100A9,Saa3,SPP1,TIMP1,TNFRSF1B
bleomycin		biologic drug	Activated	5.24	6.96e-21	ARG1,CCL2,Ccl2,CCL3L3,Ccl9,CCN4,CCR1,CCR2,CCR5,CD68,CDKN1A,CTSD,CTSK,CTSS,CXCL10,FN1,H2AX,IL6,KLF15,LAMA1,LGALS3,MMP12,MMP14,MMP8,PLA1A,Saa3,SERPINE1,SPP1,THBS1,TIMP1,Tlr13,TLR2,UBE2C
poly rI:rC-RNA		biologic drug	Activated	5.35	5.07e-19	Abi3bp,ANXA1,BIRC5,CCL2,Ccl2,CCL3L3,CCNA2,CCNB2,CCNG1,CD14,CD80,CDK1,CFB,CLEC4E,CLEC7A,CXCL10,FCGR1A,FCGR2B,FN1,GATM,IFI16,IL6,IRF7,ISG15,ITGAM,ITGAX,KYNU,LPL,LTF,MARCO,mir-8,MKI67,MMP3,MSR1,Mx1,NOP56,NR4A2,OAS1,OAS2,OLR1,PHF11,PLAU,RGS1,RPS2,RSAD2,SLFN12L,Slfn2,SOCS3,TARM1,THBS1,TLR2,TOP2A,ZBP1,ZNF616
E. coli B4 lipopolysaccharide		chemical toxicant	Activated	5.648	1.31e-19	ANXA1,C1QB,CCL2,Ccl2,CCL3L3,Cd52,CD80,Clca3a1/Clca3a2,CLEC5A,Csprs (includes others),CXCL10,CYTH4,DDIAS,F13A1,FCER1G,FCGR1A,FIBIN,GADD45G,GPNMB,HMOX1,IFI16,IL1RN,IL6,LCN2,LILRB3,LILRB4,Mx1,PLEK,RAB7B,RSAD2,SLAMF9,Slfn2,SOCS3,Stfa2/Stfa2l1,TLR2,TNFRSF1B,ZBP1,ZNF616
tetradecanoylphorbol acetate		chemical drug	Activated	6.489	1.33e-31	ADAMTS4,ADM,AKR1B10,ANXA1,AREG,ARG1,BCL2A1,BIRC5,BMP6,C3AR1,CCL2,Ccl2,CCL3L3,Ccl6,Ccl7,CCNA2,CCR2,CD14,CD68,CDK1,CDKN1A,CEMIP,CH25H,CLEC12B,CTSB,CTSD,CTSV,CXCL10,CXCL13,CYBA,CYBB,CYP1A1,CYP2E1,CYTH4,FCER1G,FCGR1A,FHL5,FST,Hamp/Hamp2,HAS2,HPSE,IFI16,IGFBP3,IL1RN,IL6,IL7R,IRF7,ISG15,ITGAM,ITGAX,ITGB2,LCN2,LIPA,LPL,mir-181,mir-8,MMP12,MMP13,MMP14,MMP19,MMP3,MMP8,MSR1,MUC5B,MYOZ2,NR4A2,OAS1,OLR1,PF4,…
lipopolysaccharide		chemical drug	Activated	8.625	3.52e-60	Abcb1b,ACTC1,ADGRE1,ADM,ALOX5AP,ANXA1,APOBEC1,APOC2,AREG,ARG1,ATP1A2,BCL2A1,C1QA,C1QC,C3AR1,CCL2,Ccl2,CCL3L3,Ccl7,Ccl9,CCN4,CCNB2,CCR1,CCR2,CCR5,CD14,CD300LD,CD300LF,Cd52,CD53,CD63,CD68,CD80,CDKN1A,CEMIP,CFB,CFD,CH25H,CLEC4D,CLEC4E,CLEC5A,CLEC7A,COL5A2,CSF2RB,CSTB,CTSB,CTSK,CTSV,CXCL10,CXCL13,CXCL16,CYBA,CYBB,CYP1A1,CYP2E1,CYP7B1,EREG,FABP5,FCER1G,FCGR2B,Fcrls,FN1,FST,GSN,GTSE1,GUCY1A1,Hamp/Hamp2…
DYSF	0.085	other			2e-21	ANXA1,C1QB,Ccl7,Cd52,CD53,CD68,CFD,CTSS,CTSV,CXCL10,CYBA,FCGR2B,FN1,GPR65,HSPA1A/HSPA1B,IFI16,LGALS3,LILRB4,MMP12,MPEG1,PSAP,SERPINA3,TCEAL9,TIMP1
ZBTB17	-0.048	transcription regulator			1.13e-14	ANLN,CCNA2,CCNB2,CDK1,CDKN1A,CKAP2,ECT2,EDA2R,KIF11,MKI67,NDC80,NUF2,NUSAP1,PBK,PRC1,RACGAP1,TOP2A,TPX2,UBE2C
KIT	-0.629	transmembrane receptor			1.79e-12	BIRC5,C3AR1,CCL2,Ccl2,CCR2,CD53,CD63,CSF2RB,CXCL10,HMOX1,IL6,ITGAM,ITGAX,ITGB2,LGALS3,LILRB4,SH3BP2,SOCS3,SPP1
BSCL2	0.308	other			9.08e-12	Ccl2,Ccl7,CFD,CLEC10A,CLEC5A,CYP2E1,GREM1,GRIA1,IL6,LGALS12,LPL,MMP13,MMP3,RSAD2,TIMP1
IFNLR1	-0.262	transmembrane receptor			1.55e-09	CCL3L3,Ccl9,CLEC4D,CLEC4E,CXCL10,IL6,IRF7,ISG15,RSAD2,THBS1,TLR2
ATP-gamma-S		chemical reagent			5.21e-09	AREG,CCL2,CCR1,CCR5,CD109,CD72,EREG,IL6,IL7R,MMP19,MPEG1,THBS1
RGS10	0.549	enzyme			2.21e-08	ARG1,CCL2,CCL3L3,Ccl7,CCR1,CXCL10,IL6,ITGAM,ITGB2,PF4,TNFRSF1B
GNA15	0.579	enzyme			2.29e-08	Abcb1b,ADM,ARG1,Ccl2,FMO1,GDA,HMOX1,IL1RN,IL6,LGALS3,OLR1,SERPINA3,SYNE1,TIMP1,VCAN
RXRB	0.032	ligand-dependent nuclear receptor			4.12e-08	C1QA,CD109,CD200R1L,CTSB,CTSS,CXCL10,LCN2,MARCO,MMP12,S100A8,SPP1,VCAN
FGFR4	-1	kinase			9.61e-08	CDK1,CDKN1A,KDR,LPL,MMP13,MMP14,PLAU,SERPINE1
amphotericin B		chemical drug			1.05e-07	CCL2,IL1RN,IL6,LCN2,SPP1,TIMP1
nystatin		chemical drug			1.92e-07	CCL3L3,CD80,IL6,LCN2,SPP1,TIMP1
GNAQ	-0.198	enzyme			2.06e-07	ADM,AREG,ARG1,Ccl2,CNN1,CTSV,FST,HAS2,IL1RN,IL6,NR4A2,OAS1,OLR1,SERPINE1
platelet activating factor-C16		chemical - endogenous mammalian			2.56e-07	IL6,ITGAM,PLA2G7,PTAFR
RNASEH2A	0.162	enzyme			2.58e-07	CXCL10,IFI16,Ifi27l2a/Ifi27l2b,IL6,IRF7,ISG15,OAS1,RSAD2,TLR2
BIRC5	1.002	other			3.04e-07	BIRC5,C1QC,Cd52,CD53,CDKN1A,COL5A2,COL8A1,CXCL13,FCGR2B,FN1
interferon beta-1a		biologic drug			1.07e-06	AOAH,CCR2,CCR5,FCER1G,FCGR1A,GPR65,IL1RN,IRF7,LGALS1,LILRB3,LTF,S100A9,TNFRSF1B
L-methionine		chemical - endogenous mammalian			1.54e-06	AREG,CCNB2,CDK1,CYP2E1,IFI16,NUSAP1,PRC1,SPP1,TOP2A
GNA14	-0.089	enzyme			1.82e-06	ADM,ARG1,CNN1,FCGR3A/FCGR3B,FST,HAS2,IL1RN,IL6,NR4A2,OLR1
telapristone acetate		chemical drug			1.88e-06	CCNA2,CCNB2,CDK1,KIF11,TOP2A,TPX2
diphtheria toxin		chemical - endogenous non-mammalian			1.99e-06	ALOX5AP,C1QA,Ccl2,CCR2,CD63,CTSD,KIF11,LGALS1,NUSAP1,PDGFC,PLA2G7,PLAU,TLR2
NEFL	0.1	other			3.71e-06	CCL2,Ccl2,Ccl6,MYO5A
STK40	-0.05	kinase			4.57e-06	Abcb1b,C1QA,C1QB,CCL2,Ccl2,CCL3L3,CCR5,PF4
RNA polymerase II		complex			4.59e-06	Acp5,ACTC1,ARG1,Ccl9,CCNB2,CD14,CD80,CDKN1A,CYP1A1,FGG,HAS2,HSPA1A/HSPA1B,IGFBP3,IL1RN,IL6,SOCS3,SPP1,TNNT2,TOP2A
kaempferol		chemical toxicant			5.2e-06	BIRC5,CDK1,CDKN1A,CYP1A1,HMOX1,PLAU
Fibrin		complex			5.2e-06	CNN1,FN1,IL6,KDR,PLAU,SERPINE1
RRP1B	0.121	transcription regulator			5.9e-06	AREG,BIRC5,CCNA2,CCNB2,CCNG1,CDK1,CDKN1A,ITGB2,KIF11,PDGFC,SPP1,TOP2A
FCGR1A	2.305	transmembrane receptor			6.35e-06	FCGR1A,IL1RN,IL6,ITGAM,ITGB2
FAM3B	-0.093	cytokine			7.01e-06	CCN4,CDKN1A,FN1,IGFBP3,LCN2,LGALS1
methylamphotericin B		chemical drug			1.14e-05	LCN2,SPP1,TIMP1
riociguat		chemical drug			1.14e-05	SERPINE1,SPP1,TIMP1
natamycin		chemical drug			1.14e-05	LCN2,SPP1,TIMP1
NKX2-1	-0.48	transcription regulator			1.4e-05	AREG,BCL2A1,CD14,CHAD,FGFR4,INMT,LCN2,LRG1,NOP56,Saa3,SCN7A,SERPINE1,TFF2,THBS1,TNC
Ren2	0.092	peptidase			1.43e-05	CYBA,CYBB,MMP13,SPP1,TIMP1
GNB2	0.11	enzyme			1.63e-05	CCL3L3,CD80,CDKN1A,MAFB,NR4A2,PLAU,PTGER4
butylhydroxybutylnitrosamine		chemical toxicant			1.67e-05	AREG,CDKN1A,CYP1A1,mir-8
PBX2	-0.255	transcription regulator			1.67e-05	CCL2,COL5A2,PF4,PLAU
NCOR2	-0.194	transcription regulator			1.99e-05	C1QA,CD80,CDKN1A,CTSB,CTSS,IL6,LPL,MMP12
GNB1	0.059	enzyme			2.34e-05	CCL3L3,CD80,CDKN1A,MAFB,NR4A2,PLAU,PTGER4
BRAF	-0.318	kinase			2.62e-05	Ccl2,CCR2,CD80,CDK1,CDKN1A,IL6,mir-181,mir-8,MMP14,THBS1
ethidium		chemical drug			2.83e-05	CCNB2,PLAU,PRC1,SERPINE1,TIMP1
C5		other			2.83e-05	Ccl2,CCL3L3,IL6,ITGB2,SOCS3
FLT3	0.623	kinase			3.29e-05	BIRC5,CXCL10,CYBA,CYBB,IL6,IRF7,Mx1
GDF15	0.439	growth factor			3.85e-05	CCR2,CDKN1A,IL6,PLAU,SERPINE1
KLK4	-0.122	peptidase			3.85e-05	CCNB2,CCNG1,CDKN1A,CDKN3,MKI67
arsenite		chemical toxicant			3.91e-05	CDKN1A,COL8A1,CYP1A1,EREG,FST,HAS2,HMOX1,HSPA1A/HSPA1B,Mt2,SERPINE1,THBS1
cloprostenol		chemical drug			4.49e-05	MMP13,SOCS3,TIMP1
finerenone		chemical drug			4.49e-05	LCN2,LGALS3,TNXB
sulfamethoxazole/trimethoprim		chemical drug			4.49e-05	CXCL10,IL6,IRF7
amoxicillin		chemical drug			4.49e-05	TLR2,TLR7,TLR8
[Lys15,Arg16,Leu27]VIP(1-7)GRF(8-27)		chemical reagent			4.49e-05	CCL2,CD80,IL6
FLLL-32		chemical reagent			4.49e-05	CCL2,Ccl6,IL6
MOGAT1	-0.106	enzyme			4.49e-05	Ccl2,CXCL10,TIMP1
LY86	1.742	other			4.49e-05	CD14,CD180,CD80
RAPGEF4	-0.447	other			4.49e-05	CTSK,SPP1,THBS1
CD300LD	1.217	other			4.49e-05	Ccl2,CD300LF,IL6
S100A11		other			4.49e-05	ADAMTS4,CDKN1A,MMP13
WTAP	-0.004	other			4.49e-05	AREG,BIRC5,CCNA2
ZXDC	-0.297	transcription regulator			4.49e-05	CCL2,CD14,ITGAM
FECH	0.145	enzyme			4.79e-05	Abcb1b,APOBEC1,Ccl2,CYP2E1,CYP7B1,HMOX1
PAK1	0.398	kinase			4.79e-05	CDKN1A,CTSD,FN1,ITGAM,ITGB2,MMP14
RNASEH2B	0.303	enzyme			4.83e-05	CDKN1A,CXCL10,ISG15,OAS1
ELK3	-0.056	transcription regulator			4.83e-05	HMOX1,MMP3,MYH6,SERPINE1
ADRA1B	0.029	G-protein coupled receptor			5.29e-05	ADRA1A,CDKN1A,CTSV,FABP5,FN1,IL6,NR4A2
IFNAR2	0.306	transmembrane receptor			5.83e-05	CXCL10,IL6,ISG15,Mx1,OAS1,OAS2
E2F4	-0.014	transcription regulator			7.18e-05	ANLN,CCNA2,CCNB2,CDK1,CDKN1A,ECT2,H2AX,MKI67,NDC80,PRC1,RRM1,SERPINE1,TOP2A,TPX2,UBE2C
BMX	-0.158	kinase			7.45e-05	HSPA1A/HSPA1B,IL6,TIMP1,TNFRSF1B
OSTM1	0.182	other			7.45e-05	Acp5,ATP6V0D2,CTSK,MAFB
ITGA3	0.057	other			7.45e-05	CTSV,FN1,PLAU,SERPINE1
MMP8	2.125	peptidase			7.45e-05	CCL3L3,CXCL10,IL6,S100A8
ADRA1A	-1.291	G-protein coupled receptor			8.19e-05	CDK1,CTSV,CYP1A1,FABP5,FN1,IL6,NR4A2
Rxr		group			8.74e-05	C1QA,CDKN1A,CTSB,CTSS,IL6,ITGB2,LTF,MMP13,PLIN2,SPP1
FGF19	0.001	growth factor			0.000105	AREG,BIRC5,CYP7B1,FABP5,IL1RN,LCN2,MMP12,Saa3,SERPINA3
lactosylceramide		chemical - endogenous mammalian			0.00011	Ccl2,Ccl7,CXCL10,IL6,TLR2
VTX-2337		chemical drug			0.00011	Ccl2,FCGR2B,IL6
poly(dG-dC)		chemical reagent			0.00011	CXCL10,ISG15,RSAD2
U 50488H		chemical reagent			0.00011	CCR2,CCR5,IL7R
PDGF-AA		complex			0.00011	AREG,CDK1,CDKN1A,EREG,IL6
IntegrinÎ±		group			0.00011	ITGAM,ITGB2,TLR2
TH2 Cytokine		group			0.00011	ARG1,CCR5,SOCS3
GRN	0.88	growth factor			0.00011	Ccl2,CTSD,CTSZ,IL6,MMP13
FGF13	0.145	growth factor			0.00011	CDKN1A,MMP13,MMP3
CACNA1A	0.096	ion channel			0.00011	Ccl2,CD68,IL6,ITGAM
miR-511-5p (miRNAs w/seed UGUCUUU)		mature microRNA			0.00011	CD80,CXCL10,IL6
Wfdc17	1.983	other			0.00011	ARG1,Ccl2,IL6
PRTN3	0.001	peptidase			0.00011	CCL2,CDKN1A,IL6
SIRPA	0.995	phosphatase			0.00011	Ccl2,CCL3L3,CD63,IL6
E2F8	0.954	transcription regulator			0.00011	CCNA2,CDK1,ECT2,RACGAP1
TSC22D1	-0.074	transcription regulator			0.00011	FN1,IL6,SERPINE1
PRF1	-0.015	transporter			0.00011	Ccl2,CCL3L3,CXCL10,IL6
SLC39A8	0.032	transporter			0.00011	MMP12,MMP13,MMP3
BRD2	-0.059	kinase			0.000123	Ccl2,HMOX1,IL6,IL7R,LY9,S100A6,SLAMF9
estrone		chemical - endogenous mammalian			0.000156	F7,IL6,IRS1,SERPINE1
Histone h3		group			0.000179	ADRA1A,BIRC5,CCL2,Ccl2,CCNA2,CDKN1A,CXCL10,HPSE,Ifi27l2a/Ifi27l2b,IGFBP3,IL6,IRF7,KDR,PRDM8,RGS4,RSAD2,S100A8,S100A9,SOCS3,SPP1,TBX3,TLR2,TOP2A
NKX3-1	-0.139	transcription regulator			0.000179	CA3,CTSB,CTSV,CTSZ,CXCL13,IGFBP3,PF4
TAF4B	0.01	transcription regulator			0.000209	FN1,FST,MMP13,MMP3,SPP1
IGHM	-0.61	transmembrane receptor			0.000209	Ccl2,CD80,CXCL13,LGALS3,SLAMF7
N-ethyl-N-nitrosourea		chemical toxicant			0.000214	CDKN1A,CYP2E1,Mt2,SPP1
IFNK	-0.032	cytokine			0.000214	CD80,CXCL10,OAS1,ZBP1
Fcgr3		group			0.000214	IL1RN,ITGAM,ITGAX,ITGB2
Sod		group			0.000214	Abcb1b,Ccl2,CCL3L3,HMOX1
CSF3R	0.551	transmembrane receptor			0.000214	CD14,FCGR1A,ITGAM,LTF
niflumic acid		chemical drug			0.000217	CD80,IL6,LILRB4
cysteamine		chemical drug			0.000217	CTSB,HMOX1,LCN2
JWH-015		chemical reagent			0.000217	CCR1,CCR2,IL6
CYP4F2	0.571	enzyme			0.000217	CYBB,IL6,KDR
SCNN1A	0.06	ion channel			0.000217	CD68,CYBB,IL6
ABL2	-0.116	kinase			0.000217	CTSB,MMP14,MMP3
ZMYND10	-0.393	other			0.000217	MMP14,MMP19,THBS1
CLEC12A	1.923	other			0.000217	IRF7,ISG15,RSAD2
Ifna4	-0.556	other			0.000217	IRF7,ISG15,SIRPB1
NET1	0.026	other			0.000217	FN1,MMP14,SERPINE1
SNW1	0.362	transcription regulator			0.000217	CDKN1A,PLAU,SERPINE1
TNFRSF10A	0.658	transmembrane receptor			0.000217	CD14,IL6,ITGAM
discodermolide		chemical drug			0.000222	CCNB2,CDK1,CDKN1A,KIF11,PRC1,TOP2A
nimesulide		chemical drug			0.000287	AREG,BIRC5,CYP1A1,EREG
probucol		chemical drug			0.000287	CYBA,CYBB,HMOX1,SERPINE1
IL19	-0.218	cytokine			0.000287	CCL2,FN1,HMOX1,IL6
E2F7	0.472	transcription regulator			0.000287	CCNA2,CDK1,ECT2,RACGAP1
SFRP4	-0.24	transmembrane receptor			0.000287	BIRC5,FN1,MYH6,TNNT2
sulindac		chemical drug			0.000317	BIRC5,CCNA2,CCNB2,CCNG1,CDK1,CDKN1A,CYP1A1
dicarbethoxydihydrocollidine		chemical toxicant			0.000367	Ccl2,CCNA2,CCNB2,CDK1,SPP1
SUMO1	0.436	enzyme			0.000367	BIRC5,CXCL10,IL6,MMP13,MYH6
parathyroid hormone-related protein		biologic drug			0.000374	BMP6,FN1,MMP13
UDP		chemical - endogenous mammalian			0.000374	Ccl2,HAS2,SERPINE1
benzoic acid		chemical - endogenous mammalian			0.000374	CD68,ITGAM,ITGAX
clarithromycin		chemical drug			0.000374	FN1,IL6,PTAFR
filgotinib		chemical drug			0.000374	IL6,MMP13,MMP3
CCL-34		chemical reagent			0.000374	CXCL10,ITGAM,ITGAX
IFNA10		cytokine			0.000374	CXCL10,ISG15,ZBP1
IFNA21		cytokine			0.000374	CXCL10,ISG15,ZBP1
IFNA5		cytokine			0.000374	CXCL10,ISG15,ZBP1
IFNA7		cytokine			0.000374	CXCL10,ISG15,ZBP1
IFNA8		cytokine			0.000374	CXCL10,ISG15,ZBP1
IFNA14		cytokine			0.000374	CXCL10,ISG15,ZBP1
IFNA6		cytokine			0.000374	CXCL10,ISG15,ZBP1
IFNA16		cytokine			0.000374	CXCL10,ISG15,ZBP1
ANG		enzyme			0.000374	CDKN1A,CXCL10,IL6
GIPR	-0.042	G-protein coupled receptor			0.000374	Ccl2,Ccl7,IL6
Ptgs2os2	-0.147	other			0.000374	Ccl2,CXCL10,Saa3
Mcpt4	0.127	peptidase			0.000374	Ccl2,CLDN4,FN1
EEF1A2	-0.334	translation regulator			0.000374	CYBA,CYBB,ITGB2
SARM1	-0.256	transmembrane receptor			0.000374	Ccl2,CCL3L3,IL6
4-nitroquinoline-1-oxide		chemical toxicant			0.000376	CCNA2,CCNB2,CDK1,CDKN1A
CDK5R1	0.087	kinase			0.000376	CD14,CD63,IL6,SERPINE1
CERK	0.459	kinase			0.000435	CCL2,CCL27,IL6,PF4,TLR2
ADRA1D	-0.632	G-protein coupled receptor			0.000436	CDK1,CTSV,FABP5,FN1,IL6,NR4A2
ADAM17	0.616	peptidase			0.000479	AREG,FN1,IL6,LRG1,MMP13,Saa3,SOCS3
OPA1	-0.021	enzyme			0.000483	IL6,S100A8,S100A9,TLR2
sepiapterin		chemical - endogenous mammalian			0.000509	KDR,LCN2
wax ester		chemical - endogenous mammalian			0.000509	CCL2,IL6
astemizole		chemical drug			0.000509	CCL2,IL6
E-4031		chemical drug			0.000509	CCL2,IL6
dofetilide		chemical drug			0.000509	CCL2,IL6
9-benzyl-8-hydroxy-2-(2-methoxyethoxy)adenine		chemical reagent			0.000509	IL6,IRF7
1,5-bis-(dihexyl-N-nitrosoamino)-2,4-dinitrobenzene		chemical reagent			0.000509	CYBB,PDE5A
BAY-u9773		chemical reagent			0.000509	CCL2,IL6
clobenpropit		chemical reagent			0.000509	CCL2,IL6
nexinhib20		chemical reagent			0.000509	CYBB,ITGAM
Alocasia cucullata root extract		chemical reagent			0.000509	CD14,ITGAM
chlorophyllin		chemical toxicant			0.000509	CCL2,HMOX1
GPR34	0.148	G-protein coupled receptor			0.000509	ITGAM,ITGB2
Metalloprotease		group			0.000509	FN1,ITGAM
Mi2		group			0.000509	Acp5,CTSK
TH17 Cytokine		group			0.000509	IL6,LGALS1
COL3A1	0.872	other			0.000509	FN1,IL1RN
POLDIP3	0.093	other			0.000509	CDKN1A,ISG15
CRADD	-0.299	other			0.000509	CCL2,IL6
CRTAP	0.109	other			0.000509	CDKN1A,SERPINE1
ZFYVE16	0.098	other			0.000509	CDKN1A,SERPINE1
PRSS2	0.229	peptidase			0.000509	MMP3,MMP8
KLF16		transcription regulator			0.000509	CDKN1A,CYP1A1
ING2	-0.046	transcription regulator			0.000509	SERPINE1,SPP1
RACGAP1	1.028	transporter			0.000509	CD14,CDKN1A
NFATC4	-0.208	transcription regulator			0.000512	Acp5,CTSD,CTSK,MYH6,SPP1
theaflavin		chemical - endogenous non-mammalian			0.000588	CCL2,CDKN1A,IL6
PD 168393		chemical - kinase inhibitor			0.000588	CCL2,CCL27,CXCL10
tyrphostin AG 1296		chemical - kinase inhibitor			0.000588	Ccl2,CD14,ITGAM
itraconazole		chemical drug			0.000588	CD14,CYP1A1,TLR2
GABP		complex			0.000588	HPSE,IL7R,PF4
CCL1	-0.032	cytokine			0.000588	IL6,ITGB2,SERPINE1
GPR84	0.517	G-protein coupled receptor			0.000588	Ccl2,CCL3L3,IL6
ADGRF5	-0.603	G-protein coupled receptor			0.000588	Ccl2,CCL3L3,IL1RN
TLR2/3/4/9		group			0.000588	CD80,FCGR2B,TREM2
RPS6KB2	-0.054	kinase			0.000588	CXCL10,IRS1,ISG15
mir-873	0.145	microRNA			0.000588	CCL2,Ccl2,IL6
LGI1	-0.064	other			0.000588	GRIA1,MMP12,MMP3
LGALS8	0.332	other			0.000588	CCL2,CDKN1A,IL6
CD180	1.291	other			0.000588	BCL2A1,CD80,IL6
GRB10	0.121	other			0.000588	IRS1,KDR,MMP12
DIABLO	-0.056	other			0.000588	BIRC5,CDKN1A,MKI67
MTF1	-0.162	transcription regulator			0.000588	MMP12,MMP13,MMP3
BRMS1	0.207	transcription regulator			0.000588	IL6,PLAU,SPP1
CD5L	0.175	transmembrane receptor			0.000588	Ccl2,Ccl7,TLR2
creatine		chemical - endogenous mammalian			0.00061	CXCL10,GATM,TLR2,TLR7
taxifolin		chemical - endogenous non-mammalian			0.00061	CYP1A1,HMOX1,IL6,TREM2
PTAFR	1.479	G-protein coupled receptor			0.00061	BIRC5,CCL2,CCL3L3,IL6
KCNE3	-0.255	ion channel			0.000641	CHL1,Csprs (includes others),CXCL13,FABP5,HMGCS2,HSPA1A/HSPA1B,NR4A2
chrysin		chemical - endogenous non-mammalian			0.000758	CCL2,CXCL10,HMOX1,PDE5A
PBX1	-0.309	transcription regulator			0.000807	CDKN1A,COL5A2,CYBB,PF4,PLAU
sphingosylphosphocholine		chemical - endogenous mammalian			0.000867	CCL2,Ccl2,TGM1
phospholipid		chemical - endogenous mammalian			0.000867	Ccl2,CCL3L3,CXCL10
bazedoxifene		chemical drug			0.000867	AREG,BIRC5,MKI67
premarin		chemical drug			0.000867	AREG,BIRC5,SERPINE1
lapatinib		chemical drug			0.000867	AREG,BIRC5,EREG
midostaurin		chemical drug			0.000867	CCL2,HMOX1,MMP13
U46619		chemical reagent			0.000867	CCL2,CDK1,MMP14
carnobyl iron		chemical reagent			0.000867	Ccl2,Hamp/Hamp2,IL6
(5-(4-N-methyl-N(2-pyridyl)amino)ethoxy)benzyl thiazolidine-2,4-dione		chemical reagent			0.000867	CTSS,ITGAM,MMP12
L-N6-(1-iminoethyl)-lysine		chemical reagent			0.000867	HMOX1,IRS1,ITGAM
ISGF3		complex			0.000867	IRF7,ISG15,RSAD2
PDE3B	0.516	enzyme			0.000867	IL6,SERPINE1,SOCS3
HAS2	1.056	enzyme			0.000867	Ccl2,IL6,TIMP1
FPR2	0.023	G-protein coupled receptor			0.000867	CCL2,CCR5,IL6
S6K1		group			0.000867	Acp5,ATP6V0D2,CTSK
DDR2	0.048	kinase			0.000867	MMP13,MMP14,MMP3
NEK6	0.908	kinase			0.000867	CXCL10,IL6,RGS1
FAT1	0.224	other			0.000867	IL6,MMP3,PLAU
LUM	0.252	other			0.000867	CDKN1A,IL6,MMP14
NELFA	-0.273	other			0.000867	CCNB2,CDKN1A,TOP2A
ANPEP	0.509	peptidase			0.000867	CD63,IL1RN,IL6
xanthohumol		chemical drug			0.000929	ANXA1,BIRC5,HMOX1,MYH6,SLN
thalidomide		chemical drug			0.000929	CD80,IL6,ITGAM,KDR,SERPINE1
ACVRL1	-0.673	kinase			0.000929	CDKN1A,KDR,MMP13,PLAU,SERPINE1
TERC	-0.002	other			0.000929	CDKN1A,NR1D1,Orm1 (includes others),PRC1,S100A9
2-mercaptoacetate		chemical drug			0.000931	CD68,CLEC6A,IL6,PLAU
HMGA2		enzyme			0.000931	BCL2A1,KLF15,LPL,SPP1
EML4-ALK		fusion gene/product			0.000931	BIRC5,COL5A2,SERPINE1,VCAN
epicatechin gallate		chemical drug			0.00113	ARG1,CCNG1,CDKN1A,IL6
D-sphingosine		chemical - endogenous mammalian			0.00122	Ccl2,IL6,SERPINE1
highly active antiretroviral therapy		chemical drug			0.00122	CCR5,IL6,IL7R
BMS-754807		chemical drug			0.00122	BIRC5,CCNA2,MKI67
tin mesoporphyrin		chemical drug			0.00122	Ccl2,CCL3L3,IL6
theophylline		chemical drug			0.00122	IL6,LGALS12,THBS1
rebamipide		chemical drug			0.00122	IL6,MMP13,TIMP1
nandrolone		chemical drug			0.00122	HMOX1,IL6,MYH6
IFNW1		cytokine			0.00122	CD80,CXCL10,ZBP1
METTL3	0.077	enzyme			0.00122	ITGAM,SOCS3,TIMP1
B4GALT6	1.389	enzyme			0.00122	CCL2,IL6,TLR2
UGDH	0.383	enzyme			0.00122	HAS2,LPL,TNC
F630028O10Rik	0.304	other			0.00122	Ccl2,IL6,ITGAM
UNC93B1	0.721	other			0.00122	CXCL10,IL6,TLR7
Traj18	-0.272	other			0.00122	Ccl2,CD80,IL6
S100P		other			0.00122	COTL1,CTSD,S100A6
SELE	0.288	transmembrane receptor			0.00122	Ccl2,CCL3L3,IL6
HPX	0.305	transporter			0.00122	IL6,ITGAM,MMP13
sargramostim		biologic drug			0.0015	CYBB,ITGAM
vapreotide		biologic drug			0.0015	CCL2,THBS1
colfosceril palmitate		chemical - endogenous mammalian			0.0015	CCL2,CXCL10
succinylacetone		chemical - endogenous mammalian			0.0015	CYBA,CYBB
Hg2+		chemical - endogenous non-mammalian			0.0015	CYP1A1,HMOX1
PKC delta V1-1 peptide 8-17		chemical - kinase inhibitor			0.0015	CCL2,Ccl2
opioid		chemical drug			0.0015	HMOX1,PLAU
mycophenolate mofetil		chemical drug			0.0015	CCL2,FN1
iodixanol		chemical drug			0.0015	LCN2,SERPINE1
URMC-099		chemical reagent			0.0015	Ccl2,IL6
mercaptosteroid 4		chemical reagent			0.0015	CCL2,Ccl2
mercaptosteroid 6		chemical reagent			0.0015	CCL2,Ccl2
N-methylsulfonyl-12,12-dibromododec-11-enamide		chemical reagent			0.0015	FN1,S100A8
L-JNK inhibitor I		chemical reagent			0.0015	BMP6,HMOX1
titanium		chemical reagent			0.0015	CCL2,IL6
Pb2+		chemical reagent			0.0015	CYP1A1,HMOX1
ZNF451	-0.003	enzyme			0.0015	CDKN1A,SERPINE1
HAS3	-0.156	enzyme			0.0015	CDKN1A,HAS2
CES1	-0.61	enzyme			0.0015	Ccl2,IL6
TIGAR	-0.119	enzyme			0.0015	CCL2,Ccl2
arginase		group			0.0015	ARG1,OLR1
CKS2	1.237	kinase			0.0015	CCNA2,CDK1
mir-431	-0.09	microRNA			0.0015	FN1,VCAN
ORM1		other			0.0015	IL1RN,IL6
FSCN1	0.865	other			0.0015	CXCL10,IRF7
TMPRSS6	0.154	peptidase			0.0015	BMP6,Hamp/Hamp2
SCARB2	0.407	transmembrane receptor			0.0015	Ccl2,IL6
ANXA5	0.317	transporter			0.0015	CD80,CDKN1A
CXCL10	1.841	cytokine			0.00161	Ccl2,Ccl6,CXCL10,IL6
COL4A3	-0.537	other			0.00161	FN1,LAMA1,MMP14,TIMP1
USP7	0.079	peptidase			0.00161	CDKN1A,IL6,PLIN2,TNNT2
SUPT16H	0.316	transcription regulator			0.00161	CDKN1A,H1-2,HSPA1A/HSPA1B,PLAU
LY-2510924		biologic drug			0.00165	CD14,LILRB3,NCAPG2
lauric acid		chemical - endogenous mammalian			0.00165	CCL3L3,CD80,IL6
trientine		chemical drug			0.00165	FN1,IGFBP3,SERPINE1
tetrathiomolybdate		chemical drug			0.00165	ITGAM,SERPINE1,TIMP1
S-equol		chemical drug			0.00165	HMOX1,IL6,SERPINE1
T 0070907		chemical reagent			0.00165	Ccl2,CDKN1A,HMOX1
RLIM	0.338	enzyme			0.00165	CDKN1A,FN1,SERPINE1
HPSE	1.266	enzyme			0.00165	CCL2,IRS1,PLAU
elastase		group			0.00165	HMOX1,MMP12,MMP3
TASP1	-0.115	peptidase			0.00165	CCNA2,CCNB2,CDKN1A
Ncoa6	-0.134	transcription regulator			0.00165	AREG,LPL,SERPINE1
CLEC1B	0.768	transmembrane receptor			0.00165	PF4,SPP1,TNC
ABCA4	-0.02	transporter			0.00165	CCL3L3,CFB,CXCL10
SLC4A1	-0.201	transporter			0.00165	FCER1G,FCGR1A,FCGR2A
GABPA	0.171	transcription regulator			0.00175	CYP7B1,HMOX1,IL7R,ITGB2,TNC
hydrochloric acid		chemical - endogenous mammalian			0.0019	CCL2,Ccl2,CCL3L3,IL6
MAP2K2	0.092	kinase			0.0019	AREG,CDKN1A,IL6,IRS1
CNOT7	0.018	transcription regulator			0.0019	ISG15,OAS1,OAS2,SLC7A11
gemcitabine		chemical drug			0.00192	Abcb1b,AREG,BIRC5,Ccl2,CDKN1A,HMOX1
fontolizumab		biologic drug			0.00216	IL6,ISG15,RSAD2
putrescine		chemical - endogenous mammalian			0.00216	CCL2,CDKN1A,TLR2
gamma-linolenic acid		chemical - endogenous mammalian			0.00216	CCL2,HMOX1,PLIN2
Fe2+		chemical - endogenous mammalian			0.00216	BMP6,CCL3L3,HMOX1
cucurbitacin B		chemical - endogenous non-mammalian			0.00216	BIRC5,CCNA2,CDKN1A
myricetin		chemical - endogenous non-mammalian			0.00216	CYP1A1,IL6,MMP13
verteporfin		chemical drug			0.00216	CDKN1A,FN1,IL6
1-((2-chlorophenyl)diphenylmethyl)-1H-pyrazole		chemical reagent			0.00216	Acp5,CCL2,CTSK
[D-Ala2,N-Me-Phe4,Gly5-ol]-Enkephalin		chemical reagent			0.00216	CCL2,CXCL10,RGS4
cytochalasin B		chemical toxicant			0.00216	BIRC5,CD63,CDKN1A
IL-17f dimer		complex			0.00216	CCL2,IL6,LCN2
CCL3L3	2.134	cytokine			0.00216	Ccl2,CXCL10,IL6
RHOB	-0.089	enzyme			0.00216	CDKN1A,IL6,ITGB2
Collagen Alpha1		group			0.00216	CDKN1A,IL1RN,PLAU
mir-127		microRNA			0.00216	ARG1,CLEC10A,IL6
COL1A1	1.209	other			0.00216	CCL2,CDKN1A,MMP14
TAC4		other			0.00216	CD80,IL6,MMP14
SH3KBP1	0.445	other			0.00216	BCL2A1,FN1,SERPINE1
RB1CC1	-0.147	other			0.00216	CDKN1A,CXCL10,SERPINE1
C9	0.169	other			0.00216	Ccl2,CCL3L3,FN1
ELN	0.402	other			0.00216	FN1,IL6,MMP12
SP7	-0.246	transcription regulator			0.00216	IL6,MMP13,SPP1
SLC7A2	0.053	transporter			0.00216	ARG1,CCL3L3,CXCL10
NFYA	0.171	transcription regulator			0.00235	CCNA2,CCNB2,CDK1,CDKN1A,CYP1A1,RGS4,TOP2A
omeprazole		chemical drug			0.00245	BIRC5,CDKN1A,CNN1,CYP1A1,FST
Igm		complex			0.00249	BCL2A1,BIRC5,CCNA2,CDKN1A,FCGR2B,PTAFR
SCAP	0.058	other			0.00252	FABP5,HMGCS2,LGALS3,Mt2,OLR1,PTGER4,SPRR1A
crizotinib		chemical drug			0.00258	AREG,COL5A2,SERPINE1,VCAN
Mir122a,b		group			0.00258	Ccl2,CCNG1,CD68,IL6
2'3'-cyclic guanosine monophosphate-adenosine monophosphate		chemical - endogenous mammalian			0.00276	CXCL10,ISG15,RSAD2
spermidine		chemical - endogenous mammalian			0.00276	CDKN1A,HMOX1,ITGAM
oxysterol		chemical - endogenous mammalian			0.00276	CCL2,Ccl2,TIMP1
cystamine		chemical drug			0.00276	Acp5,NR4A2,SPP1
FITC		chemical reagent			0.00276	Ccl2,CD80,CXCL10
Mn(III)-tetrakis-(4-benzoic acid) porphyrin		chemical reagent			0.00276	CLDN4,MSR1,SERPINE1
selenite		chemical toxicant			0.00276	BIRC5,PLAU,TIMP1
1-chloro-2-(2,2,2-trichloro-1-(4-chlorophenyl)ethyl)benzene		chemical toxicant			0.00276	CDKN1A,CYP7B1,LTF
HIF1AN	-0.033	enzyme			0.00276	ADM,ANKRD37,BIRC5
CMKLR1	-0.222	G-protein coupled receptor			0.00276	CCNA2,CCNB2,IL6
Nos		group			0.00276	HMOX1,OLR1,TIMP1
TIFA	0.111	other			0.00276	CCL2,CXCL10,IL6
METRNL	0.526	other			0.00276	Ccl2,CCL3L3,IL6
PECAM1	-0.454	other			0.00276	BIRC5,IL6,THBS1
NHLH2	-0.052	transcription regulator			0.00276	ADGRE1,CD68,IL6
GTF2I	-0.234	transcription regulator			0.00276	CDKN1A,KDR,THBS1
BACH1	0.169	transcription regulator			0.00276	HMOX1,SLC7A11,SPP1
CSF2RB	1.313	transmembrane receptor			0.00276	ADGRE1,IL6,ITGAM
FCER1A	0.008	transmembrane receptor			0.00276	Ccl2,CCL3L3,IL6
CDK4	0.298	kinase			0.00293	CDKN1A,CIP2A,DDIAS,GAS2L3,KIF11,KNL1,mir-8,MMP3,TPX2
methylselenic acid		chemical reagent			0.00295	BCL2A1,BIRC5,CCNA2,CCNB2,CDK1,CDKN1A,FN1,GUCY1A1,KIF11,MKI67,RRM1,TLR2,TOP2A
Hyaluronidase		biologic drug			0.00296	ADAMTS4,MMP13
L-alpha-lysophosphatidylcholine, palmitoyl		chemical - endogenous mammalian			0.00296	CCL2,CXCL10
chondroitin sulfate		chemical - endogenous mammalian			0.00296	FN1,MMP3
methylamine		chemical - endogenous mammalian			0.00296	FN1,IL6
hydroxycitric acid		chemical - endogenous non-mammalian			0.00296	MMP13,MMP3
pyrazole		chemical - endogenous non-mammalian			0.00296	CYP2E1,HMOX1
paxilline		chemical - endogenous non-mammalian			0.00296	BIRC5,IL6
tirapazamine		chemical drug			0.00296	CDKN1A,SPP1
plevitrexed		chemical drug			0.00296	CDK1,CDKN1A
nabumetone		chemical drug			0.00296	ACTC1,MYH6
procysteine		chemical drug			0.00296	CCL2,IL6
DCB 3503		chemical reagent			0.00296	Ccl2,IL6
diphenyliodonium		chemical reagent			0.00296	CCL2,OLR1
phenylhydrazine		chemical toxicant			0.00296	LCN2,Orm1 (includes others)
palmatine		chemical toxicant			0.00296	Abcb1b,CYP1A1
VLDL		complex			0.00296	PLIN2,SERPINE1
CLCF1	-0.239	cytokine			0.00296	MSR1,SOCS3
IL17B	0.262	cytokine			0.00296	CDKN1A,IL6
B3GNT2	-0.041	enzyme			0.00296	CD14,IL6
CYP2C8	0.225	enzyme			0.00296	Ccl2,IL6
PON3	0.178	enzyme			0.00296	Ccl2,IL6
SIRT4	-0.027	enzyme			0.00296	ADGRE1,Ccl2
RABGEF1	-0.253	enzyme			0.00296	CXCL10,IL6
ARL5B	-0.404	enzyme			0.00296	CXCL10,IL6
TXN2	-0.05	enzyme			0.00296	CYBA,CYBB
LPAR2	0.085	G-protein coupled receptor			0.00296	FN1,IL6
tyrosine kinase		group			0.00296	CYP1A1,HMOX1
Serine Protease		group			0.00296	Ccl2,IL6
MCOLN2	0.25	ion channel			0.00296	Ccl2,CCL3L3
EIF2AK1	0.232	kinase			0.00296	Hamp/Hamp2,IL6
miR-191-5p (and other miRNAs w/seed AACGGAA)		mature microRNA			0.00296	Ccl9,IL6
MYBPC3	-0.231	other			0.00296	Ccl2,CXCL10
PPP1R18	0.21	other			0.00296	Acp5,CTSK
ZC3HAV1	0.123	other			0.00296	CXCL10,IL6
CSH1/CSH2		other			0.00296	BIRC5,CYP2E1
BAG2	0.069	other			0.00296	CTSB,IL6
COL1A2	0.741	other			0.00296	CDKN1A,SERPINE1
HP	0.427	peptidase			0.00296	HMOX1,Orm1 (includes others)
GATAD2A	-0.114	transcription regulator			0.00296	ARG1,S100A9
PGRMC1	-0.216	transmembrane receptor			0.00296	BCL2A1,LCN2
CD163	0.251	transmembrane receptor			0.00296	HMOX1,IL6
LILRB3	1.159	transmembrane receptor			0.00296	CCL3L3,IL6
SLC12A3	-0.126	transporter			0.00296	Ccl2,IL6
APOD	0.178	transporter			0.00296	Ccl2,IL6
RASA1	0.044	transporter			0.00296	Hamp/Hamp2,PLAU
caspase		group			0.00298	CD14,CDK1,CDKN1A,THBS1
TYK2	0.086	kinase			0.00298	Hamp/Hamp2,LILRB4,Mx1,SOCS3
CLU	0.884	other			0.00298	CCL2,CDK1,CDKN1A,IL6
SSRP1	0.292	transcription regulator			0.00298	CDKN1A,H1-2,MYH6,PLAU
crocidolite asbestos		chemical toxicant			0.00341	Ccl2,MMP12,MMP13,SPP1
xanthine		chemical - endogenous mammalian			0.00346	CCR5,MMP14,PLAU
resatorvid		chemical drug			0.00346	CCL2,Ccl2,IL6
chlorogenic acid		chemical drug			0.00346	CCL2,HMOX1,IL6
glycyrrhetinic acid		chemical drug			0.00346	BIRC5,CCL3L3,IL6
buthionine sulfoximine		chemical drug			0.00346	CCR2,CCR5,HMOX1
D609		chemical reagent			0.00346	CCL2,IL6,MMP13
alpha-amanitin		chemical toxicant			0.00346	CDKN1A,CTSD,Saa3
C1q		complex			0.00346	CCL2,CD80,IL6
LTB	0.309	cytokine			0.00346	Ccl2,CXCL13,IL6
GALNT6	0.387	enzyme			0.00346	FN1,MUC5B,TFF2
SAT1	0.829	enzyme			0.00346	CDKN1A,IGFBP3,LPL
SHARPIN	0.18	other			0.00346	CXCL10,IL6,ISG15
ACTB	0.384	other			0.00346	CCNB2,RACGAP1,SLC11A1
LGALS9		other			0.00346	CCR5,CDKN1A,FCGR3A/FCGR3B
GON4L	-0.055	transcription regulator			0.00346	CCNA2,CCNB2,MKI67
DAXX	0.467	transcription regulator			0.00346	CDKN1A,IL6,SERPINE1
IL1RAP	-0.212	transmembrane receptor			0.00346	CD14,CXCL10,IL6
IL18R1	0.114	transmembrane receptor			0.00346	CCL3L3,IL6,SOCS3
IL1RL1	0.267	transmembrane receptor			0.00346	CXCL10,IL6,ITGAM
POU2F1	-0.506	transcription regulator			0.00349	CCNG1,CYP1A1,H2AX,IL6,LPL,OLR1,SLC7A11,SPP1
steroid		chemical - endogenous mammalian			0.00389	ANXA1,SPP1,TIMP1,TNC
betulinic acid		chemical drug			0.00389	BIRC5,CYBA,IL6,TIMP1
PML-RARA		fusion gene/product			0.00389	CDKN1A,CYTH4,H2AX,MYO1F
GTF2B	0.368	transcription regulator			0.00389	BCL2A1,CD80,CDKN1A,H2AC7
HNRNPK	0.303	other			0.00403	CDKN1A,LILRB4,MMP3,VCAN,ZBTB20
HNRNPA2B1	-0.159	other			0.00414	CEMIP,CTSV,FN1,GSN,IL6,NRCAM,OAS1,PDGFC,VCAN
prostaglandin E1		chemical - endogenous mammalian			0.00425	CD14,IL6,RRM1
ellagic acid		chemical - endogenous non-mammalian			0.00425	CDKN1A,HMOX1,MMP3
decursin		chemical - endogenous non-mammalian			0.00425	CDKN1A,KDR,MMP3
ABT-737		chemical drug			0.00425	BCL2A1,CDKN1A,IL6
pevonedistat		chemical drug			0.00425	ARG1,Ccl2,IL6
ginkgolide B		chemical drug			0.00425	CCL2,IL6,PF4
tetrandrine		chemical drug			0.00425	BIRC5,CDKN1A,IL6
2-acetylaminofluorene		chemical toxicant			0.00425	Abcb1b,CDKN1A,CYP1A1
diethylmaleate		chemical toxicant			0.00425	CDKN1A,HMOX1,SLC7A11
IL17a dimer		complex			0.00425	CCL2,IL6,LCN2
PLA2G4A	0.51	enzyme			0.00425	CCL2,Ccl2,IL6
RNASE1	0.153	enzyme			0.00425	CCL2,CXCL10,IL6
BIRC2	0.32	enzyme			0.00425	CCL2,CCNA2,IL6
NUP98-KDM5A		fusion gene/product			0.00425	C3AR1,Ccl6,MSR1
NUP98-NSD1		fusion gene/product			0.00425	C3AR1,Ccl6,MSR1
VEGFC	0.261	growth factor			0.00425	ARG1,Ccl2,KDR
STK3	0.164	kinase			0.00425	BIRC5,IL6,SPP1
DDR1	0.032	kinase			0.00425	Ccl2,CDKN1A,MMP14
miR-19b-3p (and other miRNAs w/seed GUGCAAA)		mature microRNA			0.00425	BIRC5,NR4A2,THBS1
[truncated: 1,359 more rows]
