# Supplementary material for: Transcriptomic profile of the mice aging lung is associated with inflammation and apoptosis as important pathways
Source: Aging (Albany NY). 2021 May 12;13(9):12378–94. doi: 10.18632/aging.203039 (PMC8148450; doi:10.18632/aging.203039)
Supplement: Supplementary Table 4 [file aging-13-203039-s005.xlsx]

## Sheet: all_molecules
Supplementary Table 4. Cellular localization of putative dysregulated proteins and molecular functions.
Symbol	Entrez Gene Name	Affymetrix/Gene Symbol - mouse (Entrez Gene)	Expr Log Ratio	Expr p-value	Location	Type(s)	Biomarker Application(s)	Drug(s)
ACOD1	aconitate decarboxylase 1	17302475	0.789	0.0382	Cytoplasm	enzyme
ACP2	acid phosphatase 2, lysosomal	17373222	0.961	0.0287	Cytoplasm	phosphatase
Acp5	acid phosphatase 5, tartrate resistant	17524930	1.403	0.000289	Cytoplasm	phosphatase
ACSL1	acyl-CoA synthetase long chain family member 1	17500996	-0.604	0.0196	Cytoplasm	enzyme	unspecified application
ACSS1	acyl-CoA synthetase short chain family member 1	17392690	-1.262	0.00184	Cytoplasm	enzyme
ACTC1	actin alpha cardiac muscle 1	17389510	-1.672	0.0202	Cytoplasm	enzyme
ADAP2	ArfGAP with dual PH domains 2	17253885	0.603	0.0332	Cytoplasm	other
ADSS1	adenylosuccinate synthase 1	17279349	0.906	0.00215	Cytoplasm	enzyme
AKR1A1	aldo-keto reductase family 1 member A1	17428684	0.551	0.0122	Cytoplasm	enzyme		aldose reductase inhibitor
AKR1B10	aldo-keto reductase family 1 member B10	17457128	1.111	0.0101	Cytoplasm	enzyme	unspecified application
ALDH1A1	aldehyde dehydrogenase 1 family member A1	17358103	-0.727	0.00149	Cytoplasm	enzyme	diagnosis,disease progression	chlorpropamide,disulfiram
ALDH1B1	aldehyde dehydrogenase 1 family member B1	17413674	0.505	0.0431	Cytoplasm	enzyme
ALG8	ALG8 alpha-1,3-glucosyltransferase	17480327	0.555	0.0188	Cytoplasm	enzyme
AMD1	adenosylmethionine decarboxylase 1	17425276	0.897	0.0127	Cytoplasm	enzyme
ANKRD37	ankyrin repeat domain 37	17509139	1.354	0.000244	Cytoplasm	other
ANLN	anillin actin binding protein	17524969	1.471	0.0054	Cytoplasm	other
AOPEP	aminopeptidase O (putative)	17288105	-1.066	0.0199	Cytoplasm	peptidase
Aox3	aldehyde oxidase 3	17213021	-1.56	0.000116	Cytoplasm	enzyme
AP1S1	adaptor related protein complex 1 subunit sigma 1	17453809	0.684	0.038	Cytoplasm	transporter
AP2S1	adaptor related protein complex 2 subunit sigma 1	17474136	0.575	0.028	Cytoplasm	transporter
APOBEC1	apolipoprotein B mRNA editing enzyme catalytic subunit 1	17470580	1.749	9.18e-05	Cytoplasm	enzyme
APRT	adenine phosphoribosyltransferase	17513771	0.652	0.00493	Cytoplasm	enzyme
ARAP2	ArfGAP with RhoGAP domain, ankyrin repeat and PH domain 2	17448174	-0.54	0.0381	Cytoplasm	other
ARAP3	ArfGAP with RhoGAP domain, ankyrin repeat and PH domain 3	17353881	-1.052	0.000535	Cytoplasm	other
ARG1	arginase 1	17239845	2.774	6.4e-05	Cytoplasm	enzyme	unspecified application
ARG2	arginase 2	17276776	0.857	0.0144	Cytoplasm	enzyme
ARHGAP19	Rho GTPase activating protein 19	17364707	0.788	0.0049	Cytoplasm	other	disease progression
ARHGAP25	Rho GTPase activating protein 25	17468612	0.681	0.0132	Cytoplasm	other
ARHGAP32	Rho GTPase activating protein 32	17515786	-0.64	0.0391	Cytoplasm	other
ARHGAP11A	Rho GTPase activating protein 11A	17389481	0.934	0.00875	Cytoplasm	other
ARHGDIB	Rho GDP dissociation inhibitor beta	17472210	0.697	0.0044	Cytoplasm	enzyme	diagnosis
ARHGEF15	Rho guanine nucleotide exchange factor 15	17264448	-1.019	0.00076	Cytoplasm	other
ARL6IP5	ADP ribosylation factor like GTPase 6 interacting protein 5	17461124	0.659	0.0298	Cytoplasm	other
ARPC3	actin related protein 2/3 complex subunit 3	17442096	0.504	0.0224	Cytoplasm	other
ARRB2	arrestin beta 2	17252013	0.891	5.34e-05	Cytoplasm	other
ATAT1	alpha tubulin acetyltransferase 1	17344472	-0.525	0.019	Cytoplasm	enzyme
ATOX1	antioxidant 1 copper chaperone	17263004	0.805	0.0122	Cytoplasm	transporter
ATP2A3	ATPase sarcoplasmic/endoplasmic reticulum Ca2+ transporting 3	17252497	-0.713	0.0101	Cytoplasm	transporter
Atp5k	ATP synthase, H+ transporting, mitochondrial F1F0 complex, subunit E	17450741	0.701	0.0194	Cytoplasm	enzyme
ATP6V0D2	ATPase H+ transporting V0 subunit d2	17423577	1.744	0.00552	Cytoplasm	transporter
ATP6V1B1	ATPase H+ transporting V1 subunit B1	17460107	-0.629	0.045	Cytoplasm	transporter
ATP6V1C1	ATPase H+ transporting V1 subunit C1	17311157	0.699	0.0462	Cytoplasm	transporter
ATP6V1C2	ATPase H+ transporting V1 subunit C2	17280148	-0.874	0.00105	Cytoplasm	transporter
ATP6V1E1	ATPase H+ transporting V1 subunit E1	17470445	0.578	0.0467	Cytoplasm	transporter
AXIN2	axin 2	17257801	-0.633	0.0103	Cytoplasm	other
B3GNT7	UDP-GlcNAc:betaGal beta-1,3-N-acetylglucosaminyltransferase 7	17215097	0.971	0.0166	Cytoplasm	enzyme
B4GALT5	beta-1,4-galactosyltransferase 5	17394694	0.929	0.00131	Cytoplasm	enzyme	unspecified application
B4GALT6	beta-1,4-galactosyltransferase 6	17352985	1.389	6.23e-05	Cytoplasm	enzyme
BAX	BCL2 associated X, apoptosis regulator	17490839	0.638	0.00314	Cytoplasm	transporter	efficacy,prognosis,unspecified application
BCL10	BCL10 immune signaling adaptor	17403451	0.533	0.0494	Cytoplasm	transcription regulator
BCL2A1	BCL2 related protein A1	17520171	1.362	0.00131	Cytoplasm	other
BEX3	brain expressed X-linked 3	17537895	1.107	0.0193	Cytoplasm	other
BIRC5	baculoviral IAP repeat containing 5	17258867	1.002	0.0144	Cytoplasm	other	diagnosis,disease progression,efficacy,prognosis,response to therapy,unspecified application	EZN 3042,gataparsen
BLOC1S2	biogenesis of lysosomal organelles complex 1 subunit 2	17365072	0.685	0.0243	Cytoplasm	other
BLVRB	biliverdin reductase B	17475580	0.64	0.0423	Cytoplasm	enzyme
C19orf12	chromosome 19 open reading frame 12	17476872	0.53	0.0285	Cytoplasm	other
CA3	carbonic anhydrase 3	17396152	-2.551	0.000249	Cytoplasm	enzyme		acetazolamide,benzthiazide,chlorothiazide,chlorthalidone,hydrochlorothiazide,methazolamide,sulfacetamide,topiramate,trichloromethiazide
CA13	carbonic anhydrase 13	17396143	0.941	0.00447	Cytoplasm	enzyme		acetazolamide,benzthiazide,chlorothiazide,chlorthalidone,hydrochlorothiazide,methazolamide,sulfacetamide,topiramate,trichloromethiazide
CARD19	caspase recruitment domain family member 19	17292426	0.515	0.0028	Cytoplasm	other
CASP3	caspase 3	17501041	0.637	0.0126	Cytoplasm	peptidase	diagnosis,disease progression,efficacy,unspecified application	caspase 3 inhibitor
CASQ2	calsequestrin 2	17401041	-0.792	0.0204	Cytoplasm	other	unspecified application
Cbr2	carbonyl reductase 2	17273304	-0.651	0.00259	Cytoplasm	enzyme
CCDC88C	coiled-coil domain containing 88C	17283303	-0.576	0.0443	Cytoplasm	other
CCNB2	cyclin B2	17528586	1.362	0.00516	Cytoplasm	other
CCT7	chaperonin containing TCP1 subunit 7	17460293	0.51	0.0496	Cytoplasm	other
Cd52	CD52 antigen	17431174	1.026	0.0051	Cytoplasm	other
CD177	CD177 molecule	17487759	2.483	1.17e-06	Cytoplasm	other
CDKN3	cyclin dependent kinase inhibitor 3	17299268	1.058	0.0162	Cytoplasm	phosphatase
CDKN2D	cyclin dependent kinase inhibitor 2D	17524698	0.586	0.0102	Cytoplasm	transcription regulator
CEMIP	cell migration inducing hyaluronidase 1	17492947	1.972	0.000868	Cytoplasm	enzyme
CEP70	centrosomal protein 70	17520687	-0.709	0.0333	Cytoplasm	other
CEP112	centrosomal protein 112	17257760	-0.562	0.0165	Cytoplasm	other
CEP85L	centrosomal protein 85 like	17240819	-0.742	0.0288	Cytoplasm	other
CES1	carboxylesterase 1	17511693	-0.61	0.00365	Cytoplasm	enzyme
Ces1f	carboxylesterase 1F	17511731	-0.948	0.00476	Cytoplasm	other
CFAP74	cilia and flagella associated protein 74	17422521	-0.679	0.0205	Cytoplasm	other
CH25H	cholesterol 25-hydroxylase	17364111	2.194	0.000919	Cytoplasm	enzyme	unspecified application
CHMP4B	charged multivesicular body protein 4B	17378260	0.536	0.00407	Cytoplasm	other
CHST1	carbohydrate sulfotransferase 1	17373521	-0.644	0.00661	Cytoplasm	enzyme
CHST3	carbohydrate sulfotransferase 3	17241045	-0.678	0.0474	Cytoplasm	enzyme
CHST8	carbohydrate sulfotransferase 8	17489699	-0.519	0.0394	Cytoplasm	enzyme
CIDEB	cell death inducing DFFA like effector b	17306867	0.886	0.00487	Cytoplasm	other
CIDEC	cell death inducing DFFA like effector c	17469754	-0.841	0.032	Cytoplasm	other
CIP2A	cellular inhibitor of PP2A	17326081	1.097	0.0343	Cytoplasm	other
CKAP2	cytoskeleton associated protein 2	17508025	1.51	0.00144	Cytoplasm	other
CKAP4	cytoskeleton associated protein 4	17243617	0.636	0.0398	Cytoplasm	other
CKB	creatine kinase B	17284114	0.734	0.035	Cytoplasm	kinase	safety
CKMT2	creatine kinase, mitochondrial 2	17294816	-0.845	0.0172	Cytoplasm	kinase
CLEC14A	C-type lectin domain containing 14A	17281350	-0.774	0.000748	Cytoplasm	other
CLIC5	chloride intracellular channel 5	17337852	-0.514	0.00986	Cytoplasm	ion channel
CLU	clusterin	17301452	0.884	0.018	Cytoplasm	other	efficacy,unspecified application	clusterin antisense oligonucleotide
CMBL	carboxymethylenebutenolidase homolog	17310816	0.538	0.0373	Cytoplasm	enzyme
CNDP2	carnosine dipeptidase 2	17355825	1.045	0.000105	Cytoplasm	peptidase
CNN1	calponin 1	17515402	-1.101	0.0339	Cytoplasm	other
COLGALT1	collagen beta(1-O)galactosyltransferase 1	17502280	0.671	0.00681	Cytoplasm	enzyme
COLGALT2	collagen beta(1-O)galactosyltransferase 2	17218233	-1.233	0.000607	Cytoplasm	enzyme
CORO1B	coronin 1B	17356160	0.607	0.0298	Cytoplasm	other
CORO2A	coronin 2A	17425058	0.81	0.000283	Cytoplasm	other
COTL1	coactosin like F-actin binding protein 1	17513491	1.18	0.000245	Cytoplasm	other
COX4I1	cytochrome c oxidase subunit 4I1	17506273	0.85	0.0056	Cytoplasm	enzyme
COX5A	cytochrome c oxidase subunit 5A	17517727	0.887	0.0299	Cytoplasm	enzyme
COX6A2	cytochrome c oxidase subunit 6A2	17496857	-0.944	0.0102	Cytoplasm	enzyme
Cox8b	cytochrome c oxidase subunit 8B	17497704	-0.854	0.0146	Cytoplasm	enzyme
CRISPLD2	cysteine rich secretory protein LCCL domain containing 2	17506206	-0.681	0.0167	Cytoplasm	other
CSTB	cystatin B	17234803	1.52	0.000264	Cytoplasm	peptidase	diagnosis
CTSA	cathepsin A	17379560	0.882	0.012	Cytoplasm	peptidase
CTSB	cathepsin B	17301213	1.358	0.00318	Cytoplasm	peptidase
CTSD	cathepsin D	17498099	1.342	2.72e-05	Cytoplasm	peptidase	diagnosis,unspecified application
CTSE	cathepsin E	17217035	0.67	0.0323	Cytoplasm	peptidase	prognosis
CTSH	cathepsin H	17520233	0.816	0.0398	Cytoplasm	peptidase
CTSK	cathepsin K	17400365	1.985	4.86e-05	Cytoplasm	peptidase	efficacy	balicatib,cathepsin K inhibitor,odanacatib
CTSS	cathepsin S	17400375	1.674	6.08e-05	Cytoplasm	peptidase
CTSV	cathepsin V	17293706	1.417	6.85e-05	Cytoplasm	peptidase
CTSZ	cathepsin Z	17395155	1.191	0.000143	Cytoplasm	peptidase
CYBA	cytochrome b-245 alpha chain	17513672	1.316	5.63e-05	Cytoplasm	enzyme
CYBB	cytochrome b-245 beta chain	17540154	1.743	0.0016	Cytoplasm	enzyme
CYP1A1	cytochrome P450 family 1 subfamily A member 1	17517770	-1.716	0.000121	Cytoplasm	enzyme	diagnosis
Cyp2d22	cytochrome P450, family 2, subfamily d, polypeptide 22	17319625	-0.858	0.0321	Cytoplasm	enzyme
CYP2E1	cytochrome P450 family 2 subfamily E member 1	17484587	-1.2	0.016	Cytoplasm	enzyme	diagnosis
CYP2F1	cytochrome P450 family 2 subfamily F member 1	17475498	-0.857	0.0015	Cytoplasm	enzyme
CYP4B1	cytochrome P450 family 4 subfamily B member 1	17428477	-0.829	0.00935	Cytoplasm	enzyme
CYP4F8	cytochrome P450 family 4 subfamily F member 8	17336013	-1.07	0.00593	Cytoplasm	enzyme
CYP7B1	cytochrome P450 family 7 subfamily B member 1	17404245	1.004	0.00529	Cytoplasm	enzyme
CYS1	cystin 1	17280296	-0.703	0.00662	Cytoplasm	transcription regulator
CYTH3	cytohesin 3	17444372	-0.784	0.0113	Cytoplasm	other
CYTH4	cytohesin 4	17312759	1.146	0.000131	Cytoplasm	other
DDIAS	DNA damage induced apoptosis suppressor	17493358	1.031	0.00076	Cytoplasm	other
DDO	D-aspartate oxidase	17232763	-0.538	0.0415	Cytoplasm	enzyme
DDX60	DExD/H-box helicase 60	17501440	0.689	0.013	Cytoplasm	enzyme
DENND3	DENN domain containing 3	17312097	-0.653	0.0136	Cytoplasm	other
DEPTOR	DEP domain containing MTOR interacting protein	17311533	-0.533	0.0286	Cytoplasm	other
DERA	deoxyribose-phosphate aldolase	17463898	0.535	0.0219	Cytoplasm	enzyme
DESI2	desumoylating isopeptidase 2	17219974	-1.114	0.0141	Cytoplasm	enzyme
DGKH	diacylglycerol kinase eta	17308842	-0.683	0.0345	Cytoplasm	kinase
DHRS1	dehydrogenase/reductase 1	17306856	0.551	0.0493	Cytoplasm	enzyme
DHRS9	dehydrogenase/reductase 9	17371427	1.1	0.00124	Cytoplasm	enzyme
DHX58	DExH-box helicase 58	17269595	0.651	0.00426	Cytoplasm	enzyme
DIAPH3	diaphanous related formin 3	17308965	1.136	0.0012	Cytoplasm	enzyme
DIXDC1	DIX domain containing 1	17526881	-0.655	0.024	Cytoplasm	other
DNAH10	dynein axonemal heavy chain 10	17442609	-0.577	0.0301	Cytoplasm	other
DNAJC12	DnaJ heat shock protein family (Hsp40) member C12	17233920	0.519	0.00865	Cytoplasm	other
DNAJC15	DnaJ heat shock protein family (Hsp40) member C15	17308800	0.752	0.0346	Cytoplasm	other
DNAJC19	DnaJ heat shock protein family (Hsp40) member C19	17404682	-0.642	0.0416	Cytoplasm	other
DOCK6	dedicator of cytokinesis 6	17524775	-1.017	0.0041	Cytoplasm	other
DOCK9	dedicator of cytokinesis 9	17309580	-0.832	0.00173	Cytoplasm	other
DPP7	dipeptidyl peptidase 7	17382533	0.686	0.00818	Cytoplasm	peptidase
DSE	dermatan sulfate epimerase	17240190	0.946	0.0139	Cytoplasm	enzyme
DTX3	deltex E3 ubiquitin ligase 3	17245772	-0.541	0.0364	Cytoplasm	other
ECT2	epithelial cell transforming 2	17404402	1.584	0.0077	Cytoplasm	other
EEF1E1	eukaryotic translation elongation factor 1 epsilon 1	17291964	0.98	0.0373	Cytoplasm	translation regulator
EIF5A2	eukaryotic translation initiation factor 5A2	17396492	0.701	0.0337	Cytoplasm	translation regulator
ESYT1	extended synaptotagmin 1	17246163	0.65	0.0204	Cytoplasm	other
EXT1	exostosin glycosyltransferase 1	17317015	0.726	0.0486	Cytoplasm	enzyme
FABP5	fatty acid binding protein 5	17548238	1.751	0.00355	Cytoplasm	transporter	disease progression
FAM162A	family with sequence similarity 162 member A	17330135	0.519	0.0341	Cytoplasm	other
FAU	FAU ubiquitin like and ribosomal protein S30 fusion	17331573	0.597	0.0421	Cytoplasm	other
FBXL12	F-box and leucine rich repeat protein 12	17524426	-0.703	0.0385	Cytoplasm	other
FDPS	farnesyl diphosphate synthase	17406908	0.795	0.0167	Cytoplasm	enzyme		alendronate/cholecalciferol,alendronic acid,ibandronic acid,minodronate,pamidronic acid,risedronic acid,zoledronic acid
FERMT3	fermitin family member 3	17362223	0.95	0.00161	Cytoplasm	enzyme
FHDC1	FH2 domain containing 1	17406363	-1.211	0.0015	Cytoplasm	other
FIBIN	fin bud initiation factor homolog	17389157	-1.347	0.000364	Cytoplasm	other
FMO1	flavin containing dimethylaniline monoxygenase 1	17229020	-1.456	8.37e-06	Cytoplasm	enzyme
FMO2	flavin containing dimethylaniline monoxygenase 2	17229036	-0.667	0.0177	Cytoplasm	enzyme
FMO3	flavin containing dimethylaniline monoxygenase 3	17229059	-1.16	0.00238	Cytoplasm	enzyme
FNIP2	folliculin interacting protein 2	17406066	0.787	0.000868	Cytoplasm	other
FSCN1	fascin actin-bundling protein 1	17444267	0.865	0.00267	Cytoplasm	other	unspecified application
FUCA1	alpha-L-fucosidase 1	17419965	0.712	0.00809	Cytoplasm	enzyme
FUNDC2	FUN14 domain containing 2	17535951	0.686	0.028	Cytoplasm	other
GALNS	galactosamine (N-acetyl)-6-sulfatase	17513779	0.901	0.00538	Cytoplasm	enzyme
GARS1	glycyl-tRNA synthetase 1	17458771	0.607	0.0498	Cytoplasm	enzyme
GATM	glycine amidinotransferase	17390810	1.34	0.00117	Cytoplasm	enzyme
GBA	glucosylceramidase beta	17399333	0.82	0.000595	Cytoplasm	enzyme
GDA	guanine deaminase	17363470	1.536	0.000281	Cytoplasm	enzyme
GEN1	GEN1 Holliday junction 5' flap endonuclease	17279962	0.622	0.0381	Cytoplasm	enzyme
GIMAP1	GTPase, IMAP family member 1	17458379	-0.556	0.0375	Cytoplasm	other
GLA	galactosidase alpha	17544517	0.975	0.00024	Cytoplasm	enzyme		migalastat
GLCCI1	glucocorticoid induced 1	17456001	-0.566	0.0355	Cytoplasm	other
GLIPR2	GLI pathogenesis related 2	17413500	0.903	0.000572	Cytoplasm	other
GLRX	glutaredoxin	17288716	1.113	0.027	Cytoplasm	enzyme
GM2A	GM2 ganglioside activator	17249801	0.783	0.0183	Cytoplasm	enzyme
GNPDA1	glucosamine-6-phosphate deaminase 1	17353948	0.978	0.00768	Cytoplasm	enzyme
GNPTAB	N-acetylglucosamine-1-phosphate transferase subunits alpha and beta	17236339	0.628	0.032	Cytoplasm	enzyme
GPX1	glutathione peroxidase 1	17521681	0.953	0.0119	Cytoplasm	enzyme	diagnosis,efficacy
GSR	glutathione-disulfide reductase	17500478	0.629	0.0132	Cytoplasm	enzyme		carmustine,carmustine/prednisone
GSTM5	glutathione S-transferase mu 5	17409154	-0.521	0.00144	Cytoplasm	enzyme	diagnosis,prognosis
GTSE1	G2 and S-phase expressed 1	17313895	1.028	0.00288	Cytoplasm	other
GUCY1A1	guanylate cyclase 1 soluble subunit alpha 1	17406221	-1.064	5.64e-05	Cytoplasm	enzyme		isosorbide dinitrate,isosorbide-5-mononitrate,nitroprusside
GUCY1B1	guanylate cyclase 1 soluble subunit beta 1	17406205	-0.613	0.00579	Cytoplasm	enzyme		isosorbide dinitrate,isosorbide-5-mononitrate,nitroprusside
GUSB	glucuronidase beta	17453160	1.16	0.000183	Cytoplasm	enzyme
HACD4	3-hydroxyacyl-CoA dehydratase 4	17427051	0.838	0.03	Cytoplasm	enzyme
HCK	HCK proto-oncogene, Src family tyrosine kinase	17377870	0.757	0.00865	Cytoplasm	kinase		bosutinib,bosutinib/hydroxyurea/ponatinib,bosutinib/imatinib,bosutinib/ponatinib,bosutinib/rituximab,rebastinib
HEBP1	heme binding protein 1	17472063	0.82	0.00236	Cytoplasm	other
HEXA	hexosaminidase subunit alpha	17517947	1.165	0.000911	Cytoplasm	enzyme
HEXB	hexosaminidase subunit beta	17295278	1.72	5.34e-05	Cytoplasm	enzyme
HK2	hexokinase 2	17468018	0.543	0.0324	Cytoplasm	kinase
HK3	hexokinase 3	17292775	0.689	0.0102	Cytoplasm	kinase
HMGCS2	3-hydroxy-3-methylglutaryl-CoA synthase 2	17400862	-1.027	0.0172	Cytoplasm	enzyme	unspecified application
HMOX1	heme oxygenase 1	17502573	1.651	0.000264	Cytoplasm	enzyme	efficacy,safety,unspecified application	tin mesoporphyrin
HPGD	15-hydroxyprostaglandin dehydrogenase	17501250	-0.898	0.0206	Cytoplasm	enzyme	prognosis	glycyrrhetinic acid
HPGDS	hematopoietic prostaglandin D synthase	17467269	1.597	3.13e-05	Cytoplasm	enzyme
HPRT1	hypoxanthine phosphoribosyltransferase 1	17534720	0.902	0.0497	Cytoplasm	enzyme		6-mercaptopurine,6-mercaptopurine/methotrexate,6-mercaptopurine/methotrexate/tretinoin,6-mercaptopurine/prednisone,6-mercaptopurine/prednisone/thioguanine,6-mercaptopurine/vincristine,azathioprine,cyclophosphamide/cytarabine/6-mercaptopurine,cytarabine/daunorubicin/thioguanine,cytarabine/thioguanine,dasatinib/6-mercaptopurine/methotrexate,daunorubicin/etoposide/6-mercaptopurine/mitoxantrone/predn…
HSPA1A/HSPA1B	heat shock protein family A (Hsp70) member 1A	17344132	-1.319	0.0237	Cytoplasm	enzyme	unspecified application
HYAL1	hyaluronidase 1	17521428	-0.722	0.0375	Cytoplasm	enzyme		diclofenac/hyaluronic acid,hyaluronic acid,hylan
HYDIN	HYDIN axonemal central pair apparatus protein	17505505	-0.739	0.0195	Cytoplasm	other
HYKK	hydroxylysine kinase	17517448	-0.663	0.0193	Cytoplasm	kinase
ICA1	islet cell autoantigen 1	17464803	-0.78	0.00662	Cytoplasm	other	unspecified application
IER3	immediate early response 3	17337228	0.598	0.0301	Cytoplasm	other	unspecified application
IFI30	IFI30 lysosomal thiol reductase	17510136	1.189	0.00236	Cytoplasm	enzyme
Ifi27l2a/Ifi27l2b	interferon, alpha-inducible protein 27 like 2A	17283549	1.626	0.00084	Cytoplasm	other
IKBKE	inhibitor of nuclear factor kappa B kinase subunit epsilon	17226771	0.607	0.015	Cytoplasm	kinase
INMT	indolethylamine N-methyltransferase	17467062	-1.022	0.000955	Cytoplasm	enzyme
INPP5D	inositol polyphosphate-5-phosphatase D	17215309	0.544	0.0116	Cytoplasm	phosphatase		rosiptor
IRAK4	interleukin 1 receptor associated kinase 4	17314460	0.635	0.00772	Cytoplasm	kinase		CA-4948,PF-06650833
IRS1	insulin receptor substrate 1	17224878	-1.009	0.00184	Cytoplasm	enzyme	efficacy
KANK3	KN motif and ankyrin repeat domains 3	17336175	-0.68	0.0414	Cytoplasm	other
KIAA1217	KIAA1217	17367390	-0.59	0.026	Cytoplasm	other
KIF23	kinesin family member 23	17527934	0.83	0.0167	Cytoplasm	other
KIF20A	kinesin family member 20A	17349433	0.92	0.0157	Cytoplasm	other
KRT8	keratin 8	17322113	0.607	0.0159	Cytoplasm	other	prognosis
KRT18	keratin 18	17315245	0.686	0.0344	Cytoplasm	other	efficacy
KYNU	kynureninase	17370527	1.143	0.000868	Cytoplasm	enzyme
LACC1	laccase domain containing 1	17308772	1.105	0.00447	Cytoplasm	enzyme
LCP2	lymphocyte cytosolic protein 2	17248380	0.739	0.00529	Cytoplasm	other
LGMN	legumain	17283445	1.883	5.34e-05	Cytoplasm	peptidase
LIMCH1	LIM and calponin homology domains 1	17437887	-0.715	0.000503	Cytoplasm	other
LIMS2	LIM zinc finger domain containing 2	17349209	-0.651	0.0152	Cytoplasm	other
LIPA	lipase A, lysosomal acid type	17364114	1.349	0.0414	Cytoplasm	enzyme	unspecified application
LPCAT2	lysophosphatidylcholine acyltransferase 2	17503841	1.17	0.000465	Cytoplasm	enzyme
LPL	lipoprotein lipase	17501633	1.235	0.000295	Cytoplasm	enzyme	efficacy,unspecified application	atorvastatin/niacin,lovastatin/niacin,nicotinic acid,nicotinic acid/pioglitazone,tyloxapol
LPXN	leupaxin	17357872	0.992	0.00144	Cytoplasm	transcription regulator
Lst1	leukocyte specific transcript 1	17344303	0.994	0.00574	Cytoplasm	other
Lypd2	Ly6/Plaur domain containing 2	17317994	-1.389	0.00192	Cytoplasm	other
LZTS2	leucine zipper tumor suppressor 2	17359796	-0.669	0.00184	Cytoplasm	other
MALT1	MALT1 paracaspase	17351330	0.66	0.0136	Cytoplasm	peptidase	unspecified application	JNJ-67856633
MAN2B1	mannosidase alpha class 2B member 1	17503397	0.849	0.0105	Cytoplasm	enzyme
MAP4K2	mitogen-activated protein kinase kinase kinase kinase 2	17356811	-0.737	0.00983	Cytoplasm	kinase
MAPK10	mitogen-activated protein kinase 10	17450283	-0.643	0.0342	Cytoplasm	kinase		binimetinib/cetuximab/encorafenib,binimetinib/encorafenib,binimetinib/encorafenib/panitumumab,cetuximab/encorafenib,cobimetinib/encorafenib,encorafenib,encorafenib/panitumumab,encorafenib/trametinib
MAPK13	mitogen-activated protein kinase 13	17335383	0.765	0.0112	Cytoplasm	kinase		talmapimod
MAT2A	methionine adenosyltransferase 2A	17467753	-0.7	0.0411	Cytoplasm	enzyme		AG-270
MB	myoglobin	17318741	-0.98	0.0173	Cytoplasm	transporter	diagnosis,safety,unspecified application
MBLAC2	metallo-beta-lactamase domain containing 2	17288903	-0.548	0.034	Cytoplasm	other
MBOAT1	membrane bound O-acyltransferase domain containing 1	17286254	0.69	0.0108	Cytoplasm	enzyme
MCC	MCC regulator of WNT signaling pathway	17354189	-0.971	0.00101	Cytoplasm	other
MCEMP1	mast cell expressed membrane protein 1	17498730	1.275	0.000671	Cytoplasm	other
MCTP1	multiple C2 and transmembrane domain containing 1	17288780	0.804	0.00373	Cytoplasm	other
MCUB	mitochondrial calcium uniporter dominant negative subunit beta	17410332	0.681	0.0214	Cytoplasm	other
MELK	maternal embryonic leucine zipper kinase	17413528	0.819	0.0312	Cytoplasm	kinase		OTS167
METRNL	meteorin like, glial cell differentiation regulator	17259679	0.526	0.0314	Cytoplasm	other
METTL7A	methyltransferase like 7A	17315002	-0.848	0.00677	Cytoplasm	other
MFSD12	major facilitator superfamily domain containing 12	17235701	0.592	0.0157	Cytoplasm	other
MGAT3	beta-1,4-mannosyl-glycoprotein 4-beta-N-acetylglucosaminyltransferase	17313087	-0.524	0.0446	Cytoplasm	enzyme
MGAT4A	alpha-1,3-mannosyl-glycoprotein 4-beta-N-acetylglucosaminyltransferase A	17222332	0.759	0.0105	Cytoplasm	enzyme
MICOS13	mitochondrial contact site and cristae organizing system subunit 13	17346311	0.688	0.0465	Cytoplasm	other
MID2	midline 2	17538171	-0.571	0.0472	Cytoplasm	other
Mir1192	microRNA 1192	17358219	-0.926	0.0072	Cytoplasm	microRNA
Mir5110	microRNA 5110	17267184	-0.653	0.0368	Cytoplasm	microRNA
mir-8	microRNA 200c	17433975	-1.171	0.00169	Cytoplasm	microRNA	diagnosis,unspecified application
mir-30	microRNA 30a	17317708	-0.963	0.00493	Cytoplasm	microRNA	unspecified application
mir-103	microRNA 107	17376508	-0.834	0.0368	Cytoplasm	microRNA	unspecified application
mir-133	microRNA 133b	17380764	0.968	0.0235	Cytoplasm	microRNA	unspecified application
mir-181	microRNA 181a-2	17217846	-1.183	0.0379	Cytoplasm	microRNA	unspecified application
mir-674	microRNA 674	17374468	-0.546	0.0466	Cytoplasm	microRNA
MLKL	mixed lineage kinase domain like pseudokinase	17513076	0.766	0.00258	Cytoplasm	kinase
MMP27	matrix metallopeptidase 27	17514566	0.613	0.0302	Cytoplasm	peptidase		marimastat
MPDU1	mannose-P-dolichol utilization defect 1	17264824	0.521	0.0196	Cytoplasm	other
MPEG1	macrophage expressed 1	17357810	1.608	0.000616	Cytoplasm	other		CFI-402257
MS4A4A	membrane spanning 4-domains A4A	17357640	1.927	0.000211	Cytoplasm	other
Mt1	metallothionein 1	17503942	0.842	0.00339	Cytoplasm	other
Mt2	metallothionein 2	17503937	1.491	0.00149	Cytoplasm	other
MTCL1	microtubule crosslinking factor 1	17346817	-0.636	0.00132	Cytoplasm	other
MTHFD2	methylenetetrahydrofolate dehydrogenase (NADP+ dependent) 2, methenyltetrahydrofolate cyclohydrolase	17468143	0.666	0.0112	Cytoplasm	enzyme
MTHFD1L	methylenetetrahydrofolate dehydrogenase (NADP+ dependent) 1 like	17231387	0.668	0.00399	Cytoplasm	enzyme
MYH6	myosin heavy chain 6	17306532	-1.558	0.0389	Cytoplasm	enzyme
MYL4	myosin light chain 4	17257221	-0.935	0.00208	Cytoplasm	other
MYL7	myosin light chain 7	17260236	-1.368	0.00851	Cytoplasm	enzyme
MYLK	myosin light chain kinase	17325159	-0.712	0.00399	Cytoplasm	kinase	prognosis	K-252
MYO6	myosin VI	17519821	-0.688	0.0302	Cytoplasm	other
MYO1F	myosin IF	17336114	1.044	0.000399	Cytoplasm	other
MYO5A	myosin VA	17519394	1.136	0.000465	Cytoplasm	enzyme
MYO5C	myosin VC	17519438	-0.567	0.0131	Cytoplasm	other
MYO7A	myosin VIIA	17493467	0.614	0.00691	Cytoplasm	enzyme	unspecified application
NAA80	N-alpha-acetyltransferase 80, NatH catalytic subunit	17521441	-0.583	0.0388	Cytoplasm	enzyme	unspecified application
NAGLU	N-acetyl-alpha-glucosaminidase	17256502	0.73	0.0348	Cytoplasm	enzyme	unspecified application
NAIP	NLR family apoptosis inhibitory protein	17295569	1.26	0.00158	Cytoplasm	other
NARS1	asparaginyl-tRNA synthetase 1	17355009	0.613	0.0163	Cytoplasm	enzyme
NCF1	neutrophil cytosolic factor 1	17453288	0.997	8.07e-05	Cytoplasm	enzyme	efficacy
NCF2	neutrophil cytosolic factor 2	17218261	0.995	0.000196	Cytoplasm	enzyme
NCF4	neutrophil cytosolic factor 4	17312700	0.879	0.000868	Cytoplasm	enzyme
NECAP2	NECAP endocytosis associated 2	17432124	0.501	0.0248	Cytoplasm	other
Nedd4	neural precursor cell expressed, developmentally down-regulated 4	17548726	-0.813	0.00453	Cytoplasm	enzyme
NOSTRIN	nitric oxide synthase trafficking	17371390	-0.671	0.0232	Cytoplasm	transcription regulator
NPL	N-acetylneuraminate pyruvate lyase	17228234	0.624	0.0265	Cytoplasm	enzyme
Nrbp2	nuclear receptor binding protein 2	17318312	-0.54	0.0375	Cytoplasm	other
NTPCR	nucleoside-triphosphatase, cancer-related	17506891	0.684	0.00552	Cytoplasm	other
NUDCD2	NudC domain containing 2	17248512	0.611	0.0293	Cytoplasm	other
NUS1	NUS1 dehydrodolichyl diphosphate synthase subunit	17233294	0.654	0.00266	Cytoplasm	enzyme
OAS1	2'-5'-oligoadenylate synthetase 1	17452115	1.739	0.00487	Cytoplasm	enzyme
OAS2	2'-5'-oligoadenylate synthetase 2	17452054	1.096	0.0028	Cytoplasm	enzyme
OAS3	2'-5'-oligoadenylate synthetase 3	17452070	0.732	0.0186	Cytoplasm	enzyme
OSBPL6	oxysterol binding protein like 6	17372197	-0.87	0.00175	Cytoplasm	other
PARVG	parvin gamma	17313721	0.708	0.013	Cytoplasm	other
PBK	PDZ binding kinase	17301428	1.177	0.00132	Cytoplasm	kinase
PCLO	piccolo presynaptic cytomatrix protein	17434833	-0.921	0.00186	Cytoplasm	transporter
PDCD6	programmed cell death 6	17294368	0.534	0.0498	Cytoplasm	other
PDE1B	phosphodiesterase 1B	17315606	0.604	0.0272	Cytoplasm	enzyme
PDE3A	phosphodiesterase 3A	17464040	-0.656	0.00983	Cytoplasm	enzyme		amrinone,anagrelide,cilostazol,dipyridamole,dyphylline,enoximone,medorinone,milrinone,pentoxifylline,theophylline,tolbutamide
PDE5A	phosphodiesterase 5A	17402321	-1.009	0.000868	Cytoplasm	enzyme	diagnosis	ambrisentan/tadalafil,aspirin/dipyridamole,aspirin/dipyridamole/telmisartan,avanafil,cGMP phosphodiesterase inhibitor,dipyridamole,dyphylline,pentoxifylline,sildenafil,tadalafil,theophylline,tolbutamide,udenafil,vardenafil
PDE8B	phosphodiesterase 8B	17295059	-1.077	0.000462	Cytoplasm	enzyme		ketotifen
PDK2	pyruvate dehydrogenase kinase 2	17268120	-0.738	0.00568	Cytoplasm	kinase	unspecified application
PFKL	phosphofructokinase, liver type	17242376	0.574	0.0148	Cytoplasm	kinase
PGD	phosphogluconate dehydrogenase	17433040	0.616	0.0161	Cytoplasm	enzyme
PGK1	phosphoglycerate kinase 1	17537088	0.958	0.00118	Cytoplasm	kinase
PGM1	phosphoglucomutase 1	17415815	0.502	0.0171	Cytoplasm	enzyme
PHACTR1	phosphatase and actin regulator 1	17286838	-0.668	0.0132	Cytoplasm	other
PIK3AP1	phosphoinositide-3-kinase adaptor protein 1	17364642	0.53	0.0195	Cytoplasm	other
PIK3CD	phosphatidylinositol-4,5-bisphosphate 3-kinase catalytic subunit delta	17433169	0.604	0.0364	Cytoplasm	kinase		acalisib,ACP-196/ACP-319,ACP-319,BGB-10188,bimiralisib,BR101801,buparlisib,CLR457,copanlisib,dactolisib,dezapelisib,duvelisib,GS-9901,idelalisib,idelalisib/ofatumumab,idelalisib/rituximab,KA2237,nemiralisib,parsaclisib,pictilisib,pilaralisib,PWT143,PX-866,SF 1126,SHC014748M,tenalisib,theophylline,umbralisib,YY-20394
PIK3CG	phosphatidylinositol-4,5-bisphosphate 3-kinase catalytic subunit gamma	17280609	0.844	0.00179	Cytoplasm	kinase		bimiralisib,buparlisib,CLR457,dactolisib,PI3Kg inhibitor,pictilisib,pilaralisib,PX-866,SF 1126,tenalisib
PIK3R5	phosphoinositide-3-kinase regulatory subunit 5	17251303	0.994	0.000283	Cytoplasm	kinase
PIM1	Pim-1 proto-oncogene, serine/threonine kinase	17335540	0.75	0.0072	Cytoplasm	kinase	disease progression,prognosis	AZD-1208,LGH447,PIM/FLT3 kinase inhibitor SEL24,SGI 1776
PIP4K2A	phosphatidylinositol-5-phosphate 4-kinase type 2 alpha	17382038	0.631	0.0157	Cytoplasm	kinase
Pitpnc1	phosphatidylinositol transfer protein, cytoplasmic 1	17271118	-0.555	0.0481	Cytoplasm	transporter
PKM	pyruvate kinase M1/2	17518007	0.795	0.00387	Cytoplasm	kinase	unspecified application	CAP-232
PLA2G15	phospholipase A2 group XV	17505060	0.885	0.00999	Cytoplasm	enzyme
PLCB4	phospholipase C beta 4	17376728	-0.617	0.0492	Cytoplasm	enzyme
PLCG2	phospholipase C gamma 2	17505995	0.622	0.0012	Cytoplasm	enzyme
PLCL2	phospholipase C like 2	17338521	0.591	0.0155	Cytoplasm	enzyme
PLD3	phospholipase D family member 3	17488292	1.129	0.00227	Cytoplasm	enzyme
PLEK	pleckstrin	17260761	1.412	0.000204	Cytoplasm	other
PLEKHG5	pleckstrin homology and RhoGEF domain containing G5	17422066	-0.557	0.0397	Cytoplasm	other
PLEKHO2	pleckstrin homology domain containing O2	17528274	0.68	0.0077	Cytoplasm	other
PLIN3	perilipin 3	17346216	0.541	0.0155	Cytoplasm	other
PLK4	polo like kinase 4	17397268	0.777	0.042	Cytoplasm	kinase		CFI-400945
Pln	phospholamban	17233323	-1.235	0.00286	Cytoplasm	other
Pmaip1	phorbol-12-myristate-13-acetate-induced protein 1	17351414	0.528	0.0226	Cytoplasm	other
POR	cytochrome p450 oxidoreductase	17443286	-0.765	0.00146	Cytoplasm	enzyme		carboplatin/doxorubicin,cisplatin/doxorubicin,cisplatin/doxorubicin/ifosfamide,cisplatin/doxorubicin/ifosfamide/methotrexate,cisplatin/doxorubicin/methotrexate,dacarbazine/doxorubicin,dacarbazine/doxorubicin/ifosfamide,daunorubicin,daunorubicin/tretinoin,doxorubicin,doxorubicin/ifosfamide,doxorubicin/streptozocin,doxorubicin/tretinoin,nitazoxanide,nitazoxanide/peginterferon alfa-2a/ribavirin
PPA1	inorganic pyrophosphatase 1	17233720	0.799	0.0243	Cytoplasm	enzyme
PPIC	peptidylprolyl isomerase C	17354378	0.835	0.0342	Cytoplasm	enzyme
PPM1L	protein phosphatase, Mg2+/Mn2+ dependent 1L	17398274	-0.604	0.00593	Cytoplasm	phosphatase
PPP1R13B	protein phosphatase 1 regulatory subunit 13B	17284147	-0.598	0.0301	Cytoplasm	phosphatase
PPP1R14A	protein phosphatase 1 regulatory inhibitor subunit 14A	17476119	-0.717	0.00252	Cytoplasm	phosphatase
PPP1R14B	protein phosphatase 1 regulatory inhibitor subunit 14B	17356987	0.802	0.0429	Cytoplasm	phosphatase
PRDX5	peroxiredoxin 5	17362101	0.766	0.00156	Cytoplasm	enzyme	unspecified application	auranofin
PREX1	phosphatidylinositol-3,4,5-trisphosphate dependent Rac exchange factor 1	17394582	0.515	0.0105	Cytoplasm	other
PREX2	phosphatidylinositol-3,4,5-trisphosphate dependent Rac exchange factor 2	17211131	-0.747	0.0226	Cytoplasm	other
PRKCE	protein kinase C epsilon	17340177	-0.89	0.00149	Cytoplasm	kinase	disease progression	ingenol mebutate,protein kinase C-epsilon activator
PRKD2	protein kinase D2	17474181	-0.71	0.0163	Cytoplasm	kinase
Prss44	protease, serine 44	17522458	-0.501	0.0296	Cytoplasm	other
PSAT1	phosphoserine aminotransferase 1	17363204	0.764	0.0152	Cytoplasm	enzyme
PSD3	pleckstrin and Sec7 domain containing 3	17509752	-0.692	0.0243	Cytoplasm	other
PSMB5	proteasome 20S subunit beta 5	17306417	0.772	0.00755	Cytoplasm	peptidase		bortezomib,bortezomib/cladribine/rituximab,bortezomib/dexamethasone,bortezomib/dexamethasone/doxorubicin,bortezomib/dexamethasone/lenalidomide,bortezomib/dexamethasone/pomalidomide,bortezomib/dexamethasone/rituximab,bortezomib/dexamethasone/thalidomide,bortezomib/doxorubicin,bortezomib/fulvestrant,bortezomib/lenalidomide,bortezomib/paclitaxel,bortezomib/prednisone,bortezomib/rituximab,bortezomib/…
PSMD2	proteasome 26S subunit, non-ATPase 2	17324034	0.502	0.0443	Cytoplasm	other		bortezomib,bortezomib/cladribine/rituximab,bortezomib/dexamethasone,bortezomib/dexamethasone/doxorubicin,bortezomib/dexamethasone/lenalidomide,bortezomib/dexamethasone/pomalidomide,bortezomib/dexamethasone/rituximab,bortezomib/dexamethasone/thalidomide,bortezomib/doxorubicin,bortezomib/fulvestrant,bortezomib/lenalidomide,bortezomib/paclitaxel,bortezomib/prednisone,bortezomib/rituximab,bortezomib/…
PSMD8	proteasome 26S subunit, non-ATPase 8	17488743	0.963	0.00397	Cytoplasm	other
PSMD10	proteasome 26S subunit, non-ATPase 10	17544960	0.783	0.00569	Cytoplasm	transcription regulator
PSRC1	proline and serine rich coiled-coil 1	17401710	0.871	0.00487	Cytoplasm	other
PSTPIP1	proline-serine-threonine phosphatase interacting protein 1	17517554	0.689	0.0042	Cytoplasm	other
PTGES	prostaglandin E synthase	17383712	0.775	0.0042	Cytoplasm	enzyme	prognosis
PTGS1	prostaglandin-endoperoxide synthase 1	17370309	0.91	0.00246	Cytoplasm	enzyme	efficacy	8Z,11Z,14Z-eicosatrienoic acid,acetaminophen,acetaminophen/aspirin/caffeine,acetaminophen/aspirin/codeine,acetaminophen/butalbital,acetaminophen/butalbital/caffeine,acetaminophen/butalbital/caffeine/codeine,acetaminophen/caffeine/chlorpheniramine/hydrocodone/phenylephrine,acetaminophen/caffeine/dihydrocodeine,acetaminophen/cetirizine/prednisolone,acetaminophen/clemastine/pseudoephedrine,acetamino…
PTPN6	protein tyrosine phosphatase non-receptor type 6	17470796	0.57	0.025	Cytoplasm	phosphatase		SC-43
PYGL	glycogen phosphorylase L	17281721	0.735	0.000569	Cytoplasm	enzyme
RAB32	RAB32, member RAS oncogene family	17239227	0.88	0.00575	Cytoplasm	enzyme
RAB3IL1	RAB3A interacting protein like 1	17357425	0.868	0.00478	Cytoplasm	other
RAB7B	RAB7B, member RAS oncogene family	17217048	1.304	0.000398	Cytoplasm	peptidase
RAB8B	RAB8B, member RAS oncogene family	17528405	0.809	0.0199	Cytoplasm	enzyme
RABL2A	RAB, member of RAS oncogene family like 2A	17320556	-0.589	0.0343	Cytoplasm	enzyme
RACGAP1	Rac GTPase activating protein 1	17321597	1.028	0.00487	Cytoplasm	transporter	unspecified application
RASGEF1A	RasGEF domain family member 1A	17462202	-0.744	0.0167	Cytoplasm	other
RBM3	RNA binding motif protein 3	17540027	0.551	0.0236	Cytoplasm	other
RBPMS	RNA binding protein, mRNA processing factor	17508691	-0.538	0.00807	Cytoplasm	transcription regulator
RENBP	renin binding protein	17542501	0.929	0.00163	Cytoplasm	enzyme
RGS4	regulator of G protein signaling 4	17229454	1.207	0.0039	Cytoplasm	enzyme
RGS6	regulator of G protein signaling 6	17277017	-0.742	0.00419	Cytoplasm	enzyme
RGS9	regulator of G protein signaling 9	17271209	-0.553	0.0142	Cytoplasm	enzyme
RGS16	regulator of G protein signaling 16	17218321	0.934	0.0165	Cytoplasm	enzyme		AGS-16M18
RGS22	regulator of G protein signaling 22	17316443	-0.832	0.0131	Cytoplasm	other
RILPL2	Rab interacting lysosomal protein like 2	17452853	0.775	0.0112	Cytoplasm	other
RIN2	Ras and Rab interactor 2	17377177	-0.598	0.0146	Cytoplasm	other
RMDN2	regulator of microtubule dynamics 2	17339902	-1.351	0.00617	Cytoplasm	other
RNF128	ring finger protein 128	17538096	0.791	0.044	Cytoplasm	enzyme
RNF149	ring finger protein 149	17222549	1.002	0.000121	Cytoplasm	enzyme
RNF180	ring finger protein 180	17295996	0.595	0.0394	Cytoplasm	enzyme
RNF19B	ring finger protein 19B	17418916	0.502	0.00609	Cytoplasm	enzyme
RPL10	ribosomal protein L10	17535774	1.418	0.0193	Cytoplasm	translation regulator
Rpl32	ribosomal protein L32	17469936	0.823	0.00642	Cytoplasm	other
Rpl29 (includes others)	ribosomal protein L29	17521204	0.856	0.0125	Cytoplasm	other
RPL7A	ribosomal protein L7a	17519954	0.515	0.0305	Cytoplasm	other
RPS2	ribosomal protein S2	17334404	2.091	0.0345	Cytoplasm	other
RPS10	ribosomal protein S10	17342761	0.712	0.0318	Cytoplasm	other
RPS12	ribosomal protein S12	17360842	0.771	0.0116	Cytoplasm	other		neomycin
RPS27L	ribosomal protein S27 like	17518799	0.882	0.00709	Cytoplasm	translation regulator
RPSA	ribosomal protein SA	17411141	0.834	0.00832	Cytoplasm	translation regulator
RRAD	RRAD, Ras related glycolysis inhibitor and calcium channel regulator	17512321	0.633	0.044	Cytoplasm	enzyme
RSAD2	radical S-adenosyl methionine domain containing 2	17280327	1.167	0.000868	Cytoplasm	enzyme
Rtp3	receptor transporter protein 3	17531693	-0.966	0.00128	Cytoplasm	other
S100A4	S100 calcium binding protein A4	17399802	0.982	0.000943	Cytoplasm	other	disease progression
S100A6	S100 calcium binding protein A6	17399812	1.199	0.00198	Cytoplasm	transporter	diagnosis,unspecified application
S100A8	S100 calcium binding protein A8	17399823	1.451	0.0232	Cytoplasm	other	diagnosis,efficacy,unspecified application
S100A9	S100 calcium binding protein A9	17407363	1.047	0.0325	Cytoplasm	other	diagnosis,unspecified application
S100A10	S100 calcium binding protein A10	17400000	0.641	0.0467	Cytoplasm	other
S100B	S100 calcium binding protein B	17234494	0.902	0.00288	Cytoplasm	other	diagnosis,efficacy
SAT1	spermidine/spermine N1-acetyltransferase 1	17545595	0.829	0.00638	Cytoplasm	enzyme	diagnosis
SDHAF4	succinate dehydrogenase complex assembly factor 4	17221786	0.517	0.0296	Cytoplasm	enzyme
SEPHS2	selenophosphate synthetase 2	17496651	0.599	0.0208	Cytoplasm	enzyme
SEPTIN10	septin 10	17240989	0.616	0.0102	Cytoplasm	transcription regulator
Serpinb9b	serine (or cysteine) peptidase inhibitor, clade B, member 9b	17286375	1.018	0.0108	Cytoplasm	other
SESN2	sestrin 2	17430861	0.752	0.0461	Cytoplasm	enzyme
SGIP1	SH3GL interacting endocytic adaptor 1	17416061	-0.801	0.014	Cytoplasm	other
SGPL1	sphingosine-1-phosphate lyase 1	17241162	0.925	0.00922	Cytoplasm	enzyme
SH2B2	SH2B adaptor protein 2	17453714	0.671	0.0042	Cytoplasm	other
SH3BGRL	SH3 domain binding glutamate rich protein like	17537199	0.703	0.0173	Cytoplasm	other
SH3BP2	SH3 domain binding protein 2	17436607	1.066	0.000158	Cytoplasm	other
SH3PXD2A	SH3 and PX domains 2A	17365476	-0.575	0.0272	Cytoplasm	other
SH3PXD2B	SH3 and PX domains 2B	17248288	1.104	0.000868	Cytoplasm	other
SHC4	SHC adaptor protein 4	17390980	0.751	0.0355	Cytoplasm	other
SKAP2	src kinase associated phosphoprotein 2	17466783	0.502	0.0429	Cytoplasm	other
SLC15A3	solute carrier family 15 member 3	17357597	1.194	0.000121	Cytoplasm	transporter
SLC25A42	solute carrier family 25 member 42	17509976	-0.565	0.0451	Cytoplasm	transporter
SLC37A2	solute carrier family 37 member 2	17525578	1.085	0.000121	Cytoplasm	transporter
SLC5A12	solute carrier family 5 member 12	17374137	-1.285	0.00568	Cytoplasm	transporter
Slfn2	schlafen 2	17254166	1.092	0.000943	Cytoplasm	other
SLN	sarcolipin	17517360	-1.689	0.0191	Cytoplasm	other
SNX1	sorting nexin 1	17528329	0.637	0.0258	Cytoplasm	transporter
SNX5	sorting nexin 5	17392375	0.759	0.00328	Cytoplasm	transporter
SNX10	sorting nexin 10	17458573	0.74	0.00684	Cytoplasm	transporter
SOCS3	suppressor of cytokine signaling 3	17272619	1.063	0.000131	Cytoplasm	phosphatase	diagnosis,efficacy
SORBS3	sorbin and SH3 domain containing 3	17308257	-0.78	0.0339	Cytoplasm	other
SPC25	SPC25 component of NDC80 kinetochore complex	17386161	0.741	0.0482	Cytoplasm	other
SPRY1	sprouty RTK signaling antagonist 1	17397170	-0.812	0.0114	Cytoplasm	other
SRXN1	sulfiredoxin 1	17377666	0.702	0.00267	Cytoplasm	enzyme
SSR4	signal sequence receptor subunit 4	17535697	0.61	0.0115	Cytoplasm	other
ST3GAL4	ST3 beta-galactoside alpha-2,3-sialyltransferase 4	17525329	0.564	0.0451	Cytoplasm	enzyme
STARD8	StAR related lipid transfer domain containing 8	17536463	-0.799	9.89e-05	Cytoplasm	other
STARD9	StAR related lipid transfer domain containing 9	17375111	-0.735	0.0119	Cytoplasm	other
STARD13	StAR related lipid transfer domain containing 13	17455578	-0.595	0.0142	Cytoplasm	other
Stfa2/Stfa2l1	stefin A2	17325324	1.932	0.000408	Cytoplasm	other
STING1	stimulator of interferon response cGAMP interactor 1	17353663	1.248	0.00487	Cytoplasm	other		GSK3745417,IMSA101,MIW815,MK-1454,SB 11285
STPG1	sperm tail PG-rich repeat containing 1	17419857	-0.543	0.0377	Cytoplasm	other
STXBP6	syntaxin binding protein 6	17280897	-0.62	0.014	Cytoplasm	other
SYDE1	synapse defective Rho GTPase homolog 1	17242535	-0.685	0.0296	Cytoplasm	other
SYT11	synaptotagmin 11	17406831	0.51	0.0112	Cytoplasm	transporter
TALDO1	transaldolase 1	17484881	0.553	0.0481	Cytoplasm	enzyme
TAOK2	TAO kinase 2	17496452	-0.536	0.0272	Cytoplasm	kinase
TBC1D2	TBC1 domain family member 2	17425077	0.636	0.00892	Cytoplasm	other
TBC1D30	TBC1 domain family member 30	17245466	-0.994	0.00156	Cytoplasm	other
TCTEX1D4	Tctex1 domain containing 4	17417647	0.592	0.039	Cytoplasm	other
TK1	thymidine kinase 1	17272594	0.585	0.0251	Cytoplasm	kinase	diagnosis,prognosis
TKT	transketolase	17298183	0.501	0.0261	Cytoplasm	enzyme
Tlr13	toll-like receptor 13	17537081	2.441	3.12e-05	Cytoplasm	other
TMC5	transmembrane channel like 5	17482133	0.868	0.00412	Cytoplasm	other
TMEM192	transmembrane protein 192	17501508	0.523	0.0275	Cytoplasm	other
TMEM258	transmembrane protein 258	17357478	0.569	0.0313	Cytoplasm	other
TMEM106A	transmembrane protein 106A	17256784	1.262	0.000211	Cytoplasm	other
TMOD1	tropomodulin 1	17413770	-0.929	0.0144	Cytoplasm	enzyme
TMTC1	transmembrane O-mannosyltransferase targeting cadherins 1	17472955	-0.733	0.00493	Cytoplasm	enzyme
TMTC2	transmembrane O-mannosyltransferase targeting cadherins 2	17244661	-0.637	0.0234	Cytoplasm	enzyme
TNFAIP8L2	TNF alpha induced protein 8 like 2	17407716	0.625	0.0187	Cytoplasm	other
TNIP3	TNFAIP3 interacting protein 3	17459196	2.079	8.55e-05	Cytoplasm	other
TNNI3	troponin I3, cardiac type	17485789	-0.774	0.0445	Cytoplasm	transporter	diagnosis,efficacy,safety,unspecified application
TNNT2	troponin T2, cardiac type	17217651	-1.359	0.0029	Cytoplasm	other	diagnosis,efficacy,prognosis,safety,unspecified application
TNRC6B	trinucleotide repeat containing adaptor 6B	17313169	-0.602	0.0148	Cytoplasm	other
TOMM20	translocase of outer mitochondrial membrane 20	17514247	0.583	0.0416	Cytoplasm	transporter
Trim30a/Trim30d	tripartite motif-containing 30A	17494394	0.795	0.0298	Cytoplasm	other
TSPO	translocator protein	17313654	0.854	0.0101	Cytoplasm	transmembrane receptor		alprazolam,CGS-8216,chlordiazepoxide,clonazepam,clorazepate,dexamethasone/olanzapine,diazepinomicin,estazolam,eszopiclone,flumazenil,flunitrazepam,fluoxetine/olanzapine,flurazepam,lorazepam,midazolam,olanzapine,PK 11195,SSR180575,temazepam,triazolam,zaleplon,zolpidem
TTF2	transcription termination factor 2	17408444	0.537	0.0137	Cytoplasm	transcription regulator
TTLL6	tubulin tyrosine ligase like 6	17255511	-0.686	0.0198	Cytoplasm	enzyme
TUBA1C	tubulin alpha 1c	17314693	0.887	0.00399	Cytoplasm	other		6-mercaptopurine/vincristine,bevacizumab/docetaxel,bevacizumab/docetaxel/prednisone/thalidomide/zoledronic acid,bevacizumab/paclitaxel,bevacizumab/paclitaxel/pemetrexed,bevacizumab/paclitaxel/topotecan,capecitabine/docetaxel,capecitabine/docetaxel/gemcitabine,capecitabine/docetaxel/oxaliplatin/trastuzumab,cevipabulin,colchicine,colchicine/probenecid,cyclophosphamide/daunorubicin/imatinib/predniso…
TUBB6	tubulin beta 6 class V	17351465	1.006	0.00399	Cytoplasm	other
TUBG1	tubulin gamma 1	17256549	0.531	0.00939	Cytoplasm	other		6-mercaptopurine/vincristine,bevacizumab/docetaxel,bevacizumab/docetaxel/prednisone/thalidomide/zoledronic acid,bevacizumab/paclitaxel,bevacizumab/paclitaxel/pemetrexed,bevacizumab/paclitaxel/topotecan,capecitabine/docetaxel,capecitabine/docetaxel/gemcitabine,capecitabine/docetaxel/oxaliplatin/trastuzumab,cevipabulin,colchicine,colchicine/probenecid,cyclophosphamide/daunorubicin/imatinib/predniso…
TXLNB	taxilin beta	17231789	-1.052	0.00243	Cytoplasm	other
UBE2C	ubiquitin conjugating enzyme E2 C	17379523	1.205	0.00662	Cytoplasm	enzyme
UCHL1	ubiquitin C-terminal hydrolase L1	17437876	0.745	0.00255	Cytoplasm	peptidase	diagnosis,prognosis
UNC93B1	unc-93 homolog B1, TLR signaling regulator	17356002	0.721	0.0323	Cytoplasm	other
UQCRB	ubiquinol-cytochrome c reductase binding protein	17293863	-0.629	0.0454	Cytoplasm	enzyme
UQCRQ	ubiquinol-cytochrome c reductase complex III subunit VII	17262650	0.722	0.00518	Cytoplasm	enzyme
UXS1	UDP-glucuronate decarboxylase 1	17222650	0.601	0.0125	Cytoplasm	enzyme
WAS	WASP actin nucleation promoting factor	17539997	0.791	0.00326	Cytoplasm	other
WDR63	WD repeat domain 63	17410984	-0.613	0.032	Cytoplasm	other
WSB2	WD repeat and SOCS box containing 2	17441412	0.523	0.00442	Cytoplasm	other
ZBP1	Z-DNA binding protein 1	17395079	1.375	0.00192	Cytoplasm	other
ZDHHC14	zinc finger DHHC-type palmitoyltransferase 14	17332766	-0.532	0.0453	Cytoplasm	enzyme
Abi3bp	ABI gene family, member 3 (NESH) binding protein	17326318	-1.494	0.000695	Extracellular Space	other
ACRBP	acrosin binding protein	17463031	-0.707	0.0456	Extracellular Space	other
ADAMTS4	ADAM metallopeptidase with thrombospondin type 1 motif 4	17219248	1.08	0.0316	Extracellular Space	peptidase
ADAMTS10	ADAM metallopeptidase with thrombospondin type 1 motif 10	17336086	-0.697	0.00968	Extracellular Space	peptidase	diagnosis
ADM	adrenomedullin	17481770	1.06	0.0364	Extracellular Space	other	prognosis,unspecified application
AOAH	acyloxyacyl hydrolase	17285586	1.487	0.000143	Extracellular Space	enzyme
APOC2	apolipoprotein C2	17487361	1.118	0.00454	Extracellular Space	transporter	efficacy
APOE	apolipoprotein E	17487381	0.968	0.000249	Extracellular Space	transporter	diagnosis,efficacy,prognosis,unspecified application
AREG	amphiregulin	17439029	1.502	9.18e-05	Extracellular Space	growth factor	diagnosis,efficacy,prognosis,response to therapy
BMP6	bone morphogenetic protein 6	17286682	-1.071	0.0032	Extracellular Space	growth factor
BMPER	BMP binding endothelial regulator	17515478	0.691	0.0427	Extracellular Space	other
BPIFB1	BPI fold containing family B member 1	17378149	-1.5	0.0231	Extracellular Space	other
C1QA	complement C1q A chain	17431619	2.055	3.42e-05	Extracellular Space	other
C1QB	complement C1q B chain	17431607	2.707	0.000242	Extracellular Space	other
C1QC	complement C1q C chain	17431612	2.033	0.00102	Extracellular Space	other
CCL2	C-C motif chemokine ligand 2	17254059	1.909	0.0101	Extracellular Space	cytokine	diagnosis,efficacy,prognosis,response to therapy,safety,unspecified application	CNTO 888,mimosine
Ccl2	chemokine (C-C motif) ligand 2	17254041	2.351	5.88e-06	Extracellular Space	cytokine	unspecified application
Ccl6	chemokine (C-C motif) ligand 6	17266960	1.608	0.00447	Extracellular Space	cytokine
Ccl7	chemokine (C-C motif) ligand 7	17254047	1.376	0.000884	Extracellular Space	cytokine	unspecified application
Ccl9	chemokine (C-C motif) ligand 9	17266952	2.525	9.18e-05	Extracellular Space	cytokine	unspecified application
CCL3L3	C-C motif chemokine ligand 3 like 3	17266967	2.134	0.00163	Extracellular Space	cytokine	unspecified application
CCN3	cellular communication network factor 3	17311519	-0.588	0.0295	Extracellular Space	growth factor
CCN4	cellular communication network factor 4	17312022	1.028	0.0111	Extracellular Space	other
CFAP57	cilia and flagella associated protein 57	17429245	-0.61	0.00978	Extracellular Space	other
CFB	complement factor B	17344064	1.819	0.00131	Extracellular Space	peptidase	unspecified application	IONIS-FB-LRx
CFD	complement factor D	17235018	-1.063	0.0129	Extracellular Space	peptidase
CFI	complement factor I	17402572	0.867	0.0231	Extracellular Space	peptidase
CFP	complement factor properdin	17540521	0.878	0.00354	Extracellular Space	other
CHAD	chondroadherin	17255227	-2.391	2.76e-05	Extracellular Space	other
CMTM7	CKLF like MARVEL transmembrane domain containing 7	17531923	0.553	0.0132	Extracellular Space	cytokine
COL5A1	collagen type V alpha 1 chain	17368569	0.783	0.0473	Extracellular Space	other		collagenase clostridium histolyticum
COL5A2	collagen type V alpha 2 chain	17222719	1.103	0.0072	Extracellular Space	other		collagenase clostridium histolyticum
COL8A1	collagen type VIII alpha 1 chain	17331162	1.209	0.000688	Extracellular Space	other		collagenase clostridium histolyticum
COLQ	collagen like tail subunit of asymmetric acetylcholinesterase	17304768	-0.912	0.00209	Extracellular Space	other
CPXM1	carboxypeptidase X, M14 family member 1	17391623	0.767	0.0415	Extracellular Space	peptidase
CRISP1	cysteine rich secretory protein 1	17221520	-0.672	0.0352	Extracellular Space	other
CXCL10	C-X-C motif chemokine ligand 10	17449718	1.841	0.00109	Extracellular Space	cytokine	diagnosis,efficacy,unspecified application	MDX-1100
CXCL13	C-X-C motif chemokine ligand 13	17439367	1.988	0.0155	Extracellular Space	cytokine	efficacy,unspecified application
CXCL16	C-X-C motif chemokine ligand 16	17265268	1.035	0.00363	Extracellular Space	cytokine	diagnosis,disease progression,unspecified application
CXCL17	C-X-C motif chemokine ligand 17	17487945	1.086	0.000408	Extracellular Space	cytokine
CYRIB	CYFIP related Rac1 interactor B	17317486	0.976	0.000868	Extracellular Space	other
CYTL1	cytokine like 1	17437043	-0.976	0.0152	Extracellular Space	cytokine
DDHD1	DDHD domain containing 1	17305685	0.771	0.0102	Extracellular Space	enzyme
DLL4	delta like canonical Notch ligand 4	17374792	-0.728	0.038	Extracellular Space	other		MEDI0639,OMP-21M18,OMP-305B83,REGN421
DRC1	dynein regulatory complex subunit 1	17435786	-0.643	0.026	Extracellular Space	other
ECM2	extracellular matrix protein 2	17287148	-1.404	0.0272	Extracellular Space	other
EDIL3	EGF like repeats and discoidin domains 3	17288992	-0.9	0.00399	Extracellular Space	other
EMILIN2	elastin microfibril interfacer 2	17346975	0.814	0.00123	Extracellular Space	other
EREG	epiregulin	17439021	1.166	0.00121	Extracellular Space	growth factor	prognosis,response to therapy
F13A1	coagulation factor XIII A chain	17291881	1.38	0.000748	Extracellular Space	enzyme
FAM20C	FAM20C golgi associated secretory pathway kinase	17443901	1.012	0.00231	Extracellular Space	enzyme
FGF1	fibroblast growth factor 1	17353962	-0.784	0.00325	Extracellular Space	growth factor	prognosis	pentosan polysulfate
FGG	fibrinogen gamma chain	17398485	1.34	0.0275	Extracellular Space	other		F2
FJX1	four-jointed box kinase 1	17388725	0.651	0.00156	Extracellular Space	other
FLT3LG	fms related receptor tyrosine kinase 3 ligand	17490628	-0.759	0.00356	Extracellular Space	cytokine
FN1	fibronectin 1	17224071	1.563	0.0157	Extracellular Space	enzyme	diagnosis,efficacy,prognosis,unspecified application	AS1409,iodine I 131 anti-fibronectin antibody fragment L19-SIP,L19-IL2 monoclonal antibody-cytokine fusion protein,L19-IL2 monoclonal antibody-cytokine fusion protein/L19TNFalpha,L19TNFalpha,ocriplasmin
FST	follistatin	17296344	1.093	0.00368	Extracellular Space	other
GDF3	growth differentiation factor 3	17470592	0.846	0.00544	Extracellular Space	growth factor
GLIPR1	GLI pathogenesis related 1	17244949	0.983	0.03	Extracellular Space	other
GREM1	gremlin 1, DAN family BMP antagonist	17389467	1.622	0.00274	Extracellular Space	other	unspecified application
GREM2	gremlin 2, DAN family BMP antagonist	17230127	-0.656	0.0435	Extracellular Space	other
GRN	granulin precursor	17256959	0.88	0.03	Extracellular Space	growth factor
GSN	gelsolin	17370209	-1.034	0.000242	Extracellular Space	other	disease progression,efficacy
Hamp/Hamp2	hepcidin antimicrobial peptide	17489363	-3.881	3.12e-05	Extracellular Space	other
HBEGF	heparin binding EGF like growth factor	17353699	0.984	0.00554	Extracellular Space	growth factor	diagnosis,unspecified application	KHK2866,U3-1565
HECW2	HECT, C2 and WW domain containing E3 ubiquitin protein ligase 2	17223080	-0.889	0.00908	Extracellular Space	enzyme
HMCN1	hemicentin 1	17227910	-1.134	0.00209	Extracellular Space	other
IGF1	insulin like growth factor 1	17236288	0.951	0.0199	Extracellular Space	growth factor	diagnosis,efficacy,prognosis,safety	BI 836845,MEDI-573
IGFBP3	insulin like growth factor binding protein 3	17260474	-1.622	0.000204	Extracellular Space	other	diagnosis,disease progression,efficacy,prognosis,safety
IGFBP6	insulin like growth factor binding protein 6	17315305	-0.98	0.0256	Extracellular Space	other
IL6	interleukin 6	17435725	1.074	0.00144	Extracellular Space	cytokine	diagnosis,disease progression,efficacy,prognosis,response to therapy,safety,unspecified application	clazakizumab,interleukin-6 receptor inhibitor,siltuximab,tocilizumab,ziltivekimab
IL1B	interleukin 1 beta	17391565	0.975	0.0223	Extracellular Space	cytokine	diagnosis,efficacy,prognosis	canakinumab,canakinumab/colchicine,canakinumab/INS,canakinumab/methotrexate,gallium nitrate,gevokizumab
IL1RN	interleukin 1 receptor antagonist	17367686	1.43	8.55e-05	Extracellular Space	cytokine	efficacy
INHBA	inhibin subunit beta A	17285438	0.892	0.014	Extracellular Space	growth factor	diagnosis	activin type 2B receptor Fc fusion protein STM 343,garetosmab
INSL6	insulin like 6	17363790	0.772	0.00096	Extracellular Space	other
ISG15	ISG15 ubiquitin like modifier	17434023	1.314	0.0044	Extracellular Space	other
KITLG	KIT ligand	17236900	-0.725	0.0119	Extracellular Space	growth factor	unspecified application
LAMA1	laminin subunit alpha 1	17339223	1.088	0.00169	Extracellular Space	other
LAMA3	laminin subunit alpha 3	17348492	-0.76	0.0407	Extracellular Space	other	diagnosis
LAMC2	laminin subunit gamma 2	17228136	0.832	0.0337	Extracellular Space	other	diagnosis
LCN2	lipocalin 2	17383892	1.287	0.0232	Extracellular Space	transporter	diagnosis,unspecified application
LGALS1	galectin 1	17312829	1.405	0.00168	Extracellular Space	other	diagnosis,prognosis	OTX008
LGALS3	galectin 3	17299329	1.4	4.86e-05	Extracellular Space	other	diagnosis,unspecified application	GCS-100,GR-MD-02
LGALS12	galectin 12	17362342	-1.162	0.00126	Extracellular Space	other
LIF	LIF interleukin 6 family cytokine	17246810	0.656	0.016	Extracellular Space	cytokine	unspecified application
LIPF	lipase F, gastric type	17358724	1.218	0.000143	Extracellular Space	enzyme		acarbose/orlistat,orlistat
LRG1	leucine rich alpha-2-glycoprotein 1	17346150	1.614	0.00438	Extracellular Space	other
LTBP4	latent transforming growth factor beta binding protein 4	17488179	-1.227	0.0102	Extracellular Space	growth factor
LTF	lactotransferrin	17522555	1.467	0.00289	Extracellular Space	peptidase	efficacy,unspecified application
MAMDC2	MAM domain containing 2	17363533	-1.114	0.0498	Extracellular Space	other
MIF	macrophage migration inhibitory factor	17241962	0.827	0.0167	Extracellular Space	cytokine	diagnosis,prognosis,response to therapy	imalumab
MMP3	matrix metallopeptidase 3	17514515	1.191	0.0394	Extracellular Space	peptidase	diagnosis,efficacy	marimastat
MMP8	matrix metallopeptidase 8	17514553	2.125	0.000222	Extracellular Space	peptidase	efficacy	marimastat,rebimastat
MMP12	matrix metallopeptidase 12	17514495	3.195	5.34e-05	Extracellular Space	peptidase	efficacy,unspecified application	marimastat
MMP13	matrix metallopeptidase 13	17514482	1.996	0.000116	Extracellular Space	peptidase	diagnosis	marimastat,prinomastat
MMP14	matrix metallopeptidase 14	17300279	1.253	0.0125	Extracellular Space	peptidase	diagnosis,prognosis,unspecified application	BT1718,marimastat,prinomastat,rebimastat
MMP15	matrix metallopeptidase 15	17504293	-0.782	0.00602	Extracellular Space	peptidase		marimastat
MMP19	matrix metallopeptidase 19	17238558	1.263	0.00135	Extracellular Space	peptidase		marimastat
MMP28	matrix metallopeptidase 28	17266911	-0.782	0.0142	Extracellular Space	peptidase		marimastat
MTUS1	microtubule associated scaffold protein 1	17508907	-0.506	0.0223	Extracellular Space	other
MUC5B	mucin 5B, oligomeric mucus/gel-forming	17485098	-1.626	0.0056	Extracellular Space	peptidase
MYDGF	myeloid derived growth factor	17346175	0.636	0.0488	Extracellular Space	cytokine
MYH14	myosin heavy chain 14	17490328	-0.507	0.0481	Extracellular Space	enzyme
NPC2	NPC intracellular cholesterol transporter 2	17282563	0.866	0.000477	Extracellular Space	transporter
NPFF	neuropeptide FF-amide peptide precursor	17322254	-0.603	0.018	Extracellular Space	other
Orm1 (includes others)	orosomucoid 1	17414729	1.254	0.0263	Extracellular Space	other
PAPPA	pappalysin 1	17414802	0.59	0.0321	Extracellular Space	peptidase	diagnosis
PCOLCE2	procollagen C-endopeptidase enhancer 2	17520425	-1.08	0.00796	Extracellular Space	other
PDGFC	platelet derived growth factor C	17398416	1.228	0.000461	Extracellular Space	growth factor
PF4	platelet factor 4	17438969	1.27	0.000277	Extracellular Space	cytokine	diagnosis
PGF	placental growth factor	17282664	0.935	0.00489	Extracellular Space	growth factor	diagnosis,disease progression,efficacy,prognosis	aflibercept,aflibercept/bevacizumab,aflibercept/irinotecan,RO5323441
PI16	peptidase inhibitor 16	17335506	-0.649	0.048	Extracellular Space	other
PLA1A	phospholipase A1 member A	17330359	1.132	0.0121	Extracellular Space	enzyme
PLA2G7	phospholipase A2 group VII	17337796	1.994	4.75e-05	Extracellular Space	enzyme	diagnosis,efficacy	darapladib
PLAT	plasminogen activator, tissue type	17499962	0.901	0.0166	Extracellular Space	peptidase	diagnosis,efficacy,prognosis,safety,unspecified application	6-aminocaproic acid
PLAU	plasminogen activator, urokinase	17297537	1.449	8.55e-05	Extracellular Space	peptidase	disease progression,efficacy,prognosis
PLD4	phospholipase D family member 4	17279404	1.252	0.00209	Extracellular Space	enzyme
Prg4	proteoglycan 4 (megakaryocyte stimulating factor, articular superficial zone protein)	17227892	1.013	0.0272	Extracellular Space	other
PRR12	proline rich 12	17490551	-0.697	0.0369	Extracellular Space	other
PRSS8	serine protease 8	17496806	-0.713	0.0096	Extracellular Space	peptidase
PRSS22	serine protease 22	17341671	0.584	0.0369	Extracellular Space	peptidase
PSAP	prosaposin	17233629	1.023	0.000355	Extracellular Space	enzyme	unspecified application
RETN	resistin	17498722	-0.751	0.0495	Extracellular Space	other	diagnosis,efficacy
Saa3	serum amyloid A 3	17491193	3.238	0.00822	Extracellular Space	other
Sectm1b	secreted and transmembrane 1B	17273447	1.176	8.16e-05	Extracellular Space	cytokine
SERPINA3	serpin family A member 3	17278328	1.452	0.0241	Extracellular Space	other	unspecified application
SERPINE1	serpin family E member 1	17453819	1.761	5.34e-05	Extracellular Space	other	diagnosis,disease progression,efficacy,prognosis,safety	drotrecogin alfa
SLAMF8	SLAM family member 8	17229931	0.55	0.0181	Extracellular Space	other
SLAMF9	SLAM family member 9	17219546	1.27	0.00146	Extracellular Space	other
SMPDL3B	sphingomyelin phosphodiesterase acid like 3B	17430894	0.556	0.024	Extracellular Space	enzyme
SPP1	secreted phosphoprotein 1	17439830	3.31	7.96e-09	Extracellular Space	cytokine	diagnosis,efficacy,unspecified application
TF	transferrin	17530243	0.69	0.021	Extracellular Space	transporter	efficacy,prognosis,safety,unspecified application	ferric carboxymaltose,MORAb-066,NKP-1339
TFF2	trefoil factor 2	17343170	-1.449	0.0371	Extracellular Space	other
TGFBI	transforming growth factor beta induced	17287827	1.955	2.76e-05	Extracellular Space	other
THBS1	thrombospondin 1	17374488	1.511	0.0273	Extracellular Space	other	diagnosis,efficacy
THBS3	thrombospondin 3	17399347	-1.026	0.00109	Extracellular Space	other
TIMP1	TIMP metallopeptidase inhibitor 1	17533713	2.631	0.000465	Extracellular Space	cytokine	diagnosis,disease progression,efficacy,prognosis,unspecified application
TMCC2	transmembrane and coiled-coil domain family 2	17226874	-0.625	0.0128	Extracellular Space	other
TNC	tenascin C	17426365	3.233	0.000645	Extracellular Space	other	diagnosis,response to therapy	131I-tenatumomab,F16-IL2 fusion protein,iodine I 131 monoclonal antibody F16SIP
TNF	tumor necrosis factor	17344309	0.953	0.00399	Extracellular Space	cytokine	diagnosis,disease progression,efficacy,prognosis,response to therapy,safety,unspecified application	adalimumab,adalimumab/methotrexate,afelimomab,bevacizumab/docetaxel/prednisone/thalidomide/zoledronic acid,bortezomib/dexamethasone/pomalidomide,bortezomib/dexamethasone/thalidomide,bortezomib/thalidomide,certolizumab,certolizumab/methotrexate,cyclophosphamide/dexamethasone/thalidomide,dexamethasone/pomalidomide,dexamethasone/thalidomide,etanercept,etanercept/methotrexate,golimumab,golimumab/meth…
TNFAIP2	TNF alpha induced protein 2	17279131	0.606	0.0151	Extracellular Space	other
TNFSF14	TNF superfamily member 14	17346522	0.602	0.0105	Extracellular Space	cytokine		CERC-002
TNFSF18	TNF superfamily member 18	17218707	1.181	0.0379	Extracellular Space	cytokine
TNXB	tenascin XB	17336681	-1.027	0.00325	Extracellular Space	other
VCAN	versican	17294738	1.055	0.00665	Extracellular Space	other
VEGFA	vascular endothelial growth factor A	17345293	-0.615	0.00462	Extracellular Space	growth factor	diagnosis,efficacy,prognosis,safety,unspecified application	aflibercept,aflibercept/bevacizumab,aflibercept/irinotecan,atezolizumab/bevacizumab,bevacizumab,bevacizumab-IRDye 800CW,bevacizumab/5-fluorouracil,bevacizumab/5-fluorouracil/irinotecan/oxaliplatin,bevacizumab/capecitabine,bevacizumab/capecitabine/irinotecan,bevacizumab/capecitabine/irinotecan/oxaliplatin,bevacizumab/capecitabine/oxaliplatin,bevacizumab/capecitabine/temozolomide,bevacizumab/carmus…
VWF	von Willebrand factor	17463205	0.76	0.0136	Extracellular Space	other	diagnosis,efficacy,prognosis,unspecified application	caplacizumab,F8
XCL1	X-C motif chemokine ligand 1	17229187	0.674	0.0285	Extracellular Space	cytokine	unspecified application
AAAS	aladin WD repeat nucleoporin	17322200	0.524	0.0204	Nucleus	other
ADAP1	ArfGAP with dual PH domains 1	17454382	0.607	0.0145	Nucleus	other
AEN	apoptosis enhancing nuclease	17479303	0.532	0.044	Nucleus	enzyme
AFF3	AF4/FMR2 family member 3	17222465	-0.995	0.0018	Nucleus	transcription regulator
AIF1	allograft inflammatory factor 1	17344289	0.874	0.018	Nucleus	other
AMMECR1	AMMECR nuclear protein 1	17545078	0.583	0.0075	Nucleus	other
ASCL1	achaete-scute family bHLH transcription factor 1	17243839	-0.723	0.0172	Nucleus	transcription regulator	unspecified application
ASF1B	anti-silencing function 1B histone chaperone	17503023	0.688	0.0218	Nucleus	other
ATAD2	ATPase family AAA domain containing 2	17317233	0.733	0.0154	Nucleus	enzyme
ATF3	activating transcription factor 3	17231033	0.918	0.000131	Nucleus	transcription regulator	unspecified application
ATF7	activating transcription factor 7	17322261	-0.818	0.0101	Nucleus	transcription regulator
ATF7IP	activating transcription factor 7 interacting protein	17463829	-0.561	0.0206	Nucleus	transcription regulator
AURKB	aurora kinase B	17251485	0.767	0.0488	Nucleus	kinase		AMG 900,AT-9283,barasertib,BI 811283,chiauranib,CYC 116,danusertib,GSK1070916,ilorasertib,SKI-G-801,SNS 314,TAK-901,tozasertib,TTP607
BASP1	brain abundant membrane attached signal protein 1	17316175	0.625	0.00222	Nucleus	transcription regulator
BATF3	basic leucine zipper ATF-like transcription factor 3	17220787	0.677	0.0375	Nucleus	transcription regulator
BHLHE40	basic helix-loop-helix family member e40	17461414	0.731	0.0123	Nucleus	transcription regulator
BRINP1	BMP/retinoic acid inducible neural specific 1	17426434	0.698	0.0493	Nucleus	peptidase
BUB1	BUB1 mitotic checkpoint serine/threonine kinase	17391376	0.882	0.0429	Nucleus	kinase
BUB1B	BUB1 mitotic checkpoint serine/threonine kinase B	17374569	0.558	0.0482	Nucleus	kinase
C15orf48	chromosome 15 open reading frame 48	17375503	1.66	0.0121	Nucleus	other
CALCOCO1	calcium binding and coiled-coil domain 1	17322289	-0.817	0.00637	Nucleus	transcription regulator
CAPG	capping actin protein, gelsolin like	17459656	0.873	0.00109	Nucleus	other
CASZ1	castor zinc finger 1	17421735	-0.74	0.0193	Nucleus	enzyme
CCNA2	cyclin A2	17404821	1.62	0.000788	Nucleus	other	efficacy,prognosis
CCND1	cyclin D1	17498502	0.663	0.0422	Nucleus	transcription regulator	diagnosis,efficacy,prognosis,response to therapy,unspecified application	arsenic trioxide,arsenic trioxide/cytarabine/methotrexate,arsenic trioxide/daunorubicin/tretinoin,arsenic trioxide/gemtuzumab ozogamicin/tretinoin,arsenic trioxide/idarubicin/tretinoin,arsenic trioxide/tretinoin
CCNG1	cyclin G1	17261865	1.284	0.0116	Nucleus	other
CDC6	cell division cycle 6	17256225	0.572	0.0467	Nucleus	other
CDCA8	cell division cycle associated 8	17429896	0.662	0.0285	Nucleus	other
CDK1	cyclin dependent kinase 1	17241692	1.374	0.00344	Nucleus	kinase	efficacy	AG 024322,alvocidib,AZD5438,dinaciclib,milciclib,riviciclib,roniciclib,zotiraciclib
CDKN1A	cyclin dependent kinase inhibitor 1A	17335467	1.452	0.0392	Nucleus	kinase	diagnosis,efficacy,prognosis,response to therapy
CENPE	centromere protein E	17402797	0.942	0.00709	Nucleus	other		GSK923295
CENPN	centromere protein N	17505913	0.754	0.0394	Nucleus	other
CHAF1B	chromatin assembly factor 1 subunit B	17327331	0.585	0.0272	Nucleus	other	unspecified application
CHEK2	checkpoint kinase 2	17440575	0.671	0.0388	Nucleus	kinase		XL844
CHURC1	churchill domain containing 1	17276614	0.941	0.0191	Nucleus	transcription regulator
CIB1	calcium and integrin binding 1	17492495	0.535	0.042	Nucleus	other
CLIC1	chloride intracellular channel 1	17336896	0.875	0.00521	Nucleus	ion channel
CSRP3	cysteine and glycine rich protein 3	17491368	-0.925	0.0448	Nucleus	other
CTPS1	CTP synthase 1	17429454	1.258	0.000121	Nucleus	enzyme		cytidine triphosphate synthetase inhibitor
DACH1	dachshund family transcription factor 1	17309041	-0.758	0.00828	Nucleus	transcription regulator
DBF4	DBF4 zinc finger	17445507	0.698	0.0382	Nucleus	kinase
DCK	deoxycytidine kinase	17438823	0.913	0.00255	Nucleus	kinase	efficacy,response to therapy	alemtuzumab/fludarabine phosphate,chlorambucil/cladribine,cladribine,cladribine/cyclophosphamide,cladribine/cytarabine/daunorubicin,cladribine/cytarabine/filgrastim,cladribine/cytarabine/filgrastim/mitoxantrone,cladribine/rituximab,cytarabine/dasatinib/filgrastim/fludarabine phosphate,cytarabine/dasatinib/filgrastim/fludarabine phosphate/idarubicin,cytarabine/daunorubicin/fludarabine phosphate,cy…
DDX5	DEAD-box helicase 5	17270974	-0.505	0.0268	Nucleus	enzyme	unspecified application
DEPDC1	DEP domain containing 1	17403919	1.103	0.0064	Nucleus	transcription regulator
DYRK1B	dual specificity tyrosine phosphorylation regulated kinase 1B	17475787	-0.555	0.0224	Nucleus	kinase
E2F8	E2F transcription factor 8	17491378	0.954	0.0243	Nucleus	transcription regulator
EBF1	EBF transcription factor 1	17248691	-0.841	0.0269	Nucleus	transcription regulator
EGR2	early growth response 2	17233993	0.927	0.000264	Nucleus	transcription regulator
ENC1	ectodermal-neural cortex 1	17289372	0.713	0.00108	Nucleus	peptidase
EPAS1	endothelial PAS domain protein 1	17340197	-0.632	0.00535	Nucleus	transcription regulator	prognosis	PT-2385,PT2977
ERH	ERH mRNA splicing and mitosis factor	17282274	0.838	0.0434	Nucleus	other
ESCO2	establishment of sister chromatid cohesion N-acetyltransferase 2	17307774	0.857	0.0464	Nucleus	enzyme
EXOSC7	exosome component 7	17523555	-0.685	0.000264	Nucleus	enzyme
EYA1	EYA transcriptional coactivator and phosphatase 1	17221375	-0.595	0.0424	Nucleus	phosphatase
Fam13a	family with sequence similarity 13, member A	17467209	-0.884	0.00465	Nucleus	other
FAM205A	family with sequence similarity 205 member A	17424415	-1.259	0.00662	Nucleus	other
FBL	fibrillarin	17475777	0.633	0.0496	Nucleus	enzyme
FGR	FGR proto-oncogene, Src family tyrosine kinase	17419483	0.781	0.00479	Nucleus	kinase		atezolizumab/cobimetinib/vemurafenib,binimetinib/vemurafenib,cetuximab/irinotecan/vemurafenib,cetuximab/vemurafenib,cobimetinib/vemurafenib,crizotinib/vemurafenib,dabrafenib/trametinib/vemurafenib,ipilimumab/vemurafenib,irinotecan/panitumumab/vemurafenib,pembrolizumab/vemurafenib,rebastinib,trametinib/vemurafenib,vemurafenib
FHL5	four and a half LIM domains 5	17423665	1.377	0.0062	Nucleus	transcription regulator
FIGNL1	fidgetin like 1	17260633	0.663	0.0136	Nucleus	enzyme
Firre	functional intergenic repeating RNA element	17541567	-0.658	0.0441	Nucleus	other
FOSL1	FOS like 1, AP-1 transcription factor subunit	17356427	0.932	0.00489	Nucleus	transcription regulator		MORAb-202
FOXA1	forkhead box A1	17281337	-0.86	0.0102	Nucleus	transcription regulator	disease progression
FOXF1	forkhead box F1	17506291	-0.948	0.00519	Nucleus	transcription regulator
FOXJ2	forkhead box J2	17462705	-0.555	0.0345	Nucleus	transcription regulator
FOXR2	forkhead box R2	17538978	-0.527	0.025	Nucleus	transcription regulator
FYB1	FYN binding protein 1	17309981	0.926	0.0105	Nucleus	other
GADD45G	growth arrest and DNA damage inducible gamma	17287361	1.297	0.000423	Nucleus	other	efficacy
GATA2	GATA binding protein 2	17460634	-0.733	0.0272	Nucleus	transcription regulator
GMNC	geminin coiled-coil domain containing	17329500	-1.043	0.000462	Nucleus	other
H1-2	H1.2 linker histone, cluster member	17285859	1.101	0.00627	Nucleus	other
H1f1	H1.1 linker histone, cluster member	17285879	1.662	0.000264	Nucleus	other
H2AC7	H2A clustered histone 7	17285867	1.818	0.0337	Nucleus	other
H2AC11	H2A clustered histone 11	17291012	1.052	0.0156	Nucleus	other
H2AC14	H2A clustered histone 14	17285819	1.087	0.048	Nucleus	other
H2AW	H2A.W histone	17250178	-0.748	0.0314	Nucleus	other
H2AX	H2A.X variant histone	17516558	1.073	0.0454	Nucleus	transcription regulator	efficacy
H2BC3	H2B clustered histone 3	17285863	0.828	0.0414	Nucleus	other
H2BC6	H2B clustered histone 6	17290997	0.855	0.0149	Nucleus	other
H2BC14	H2B clustered histone 14	17285691	1.25	0.00288	Nucleus	other
H4C6	H4 clustered histone 6	17291208	0.769	0.0304	Nucleus	other
HCLS1	hematopoietic cell-specific Lyn substrate 1	17325438	0.965	0.00024	Nucleus	other
HDAC5	histone deacetylase 5	17270082	-0.602	0.0055	Nucleus	transcription regulator		belinostat,pyroxamide,tributyrin
HELLS	helicase, lymphoid specific	17359212	0.808	0.0321	Nucleus	enzyme
HES6	hes family bHLH transcription factor 6	17225499	0.519	0.0132	Nucleus	transcription regulator
HIF1A	hypoxia inducible factor 1 subunit alpha	17276328	0.989	0.00843	Nucleus	transcription regulator	diagnosis,efficacy,prognosis,response to therapy	EZN 2968,PX 478
HMBOX1	homeobox containing 1	17307709	-0.549	0.0137	Nucleus	transcription regulator
Hnrnpa3	heterogeneous nuclear ribonucleoprotein A3	17372140	-0.77	0.0302	Nucleus	transporter
HOXB4	homeobox B4	17255594	-0.655	0.0158	Nucleus	transcription regulator
HTATIP2	HIV-1 Tat interactive protein 2	17478352	0.642	0.0123	Nucleus	transcription regulator	efficacy
IFI16	interferon gamma inducible protein 16	17230045	2.679	0.000868	Nucleus	transcription regulator	unspecified application
INTS6L	integrator complex subunit 6 like	17534909	-0.674	0.0493	Nucleus	other
IRF7	interferon regulatory factor 7	17497813	1.556	3.12e-05	Nucleus	transcription regulator
IRF8	interferon regulatory factor 8	17506279	0.558	0.0222	Nucleus	transcription regulator
IRX2	iroquois homeobox 2	17288442	-0.775	0.00211	Nucleus	transcription regulator
JPT1	Jupiter microtubule associated homolog 1	17271920	0.532	0.00662	Nucleus	other	unspecified application
JUNB	JunB proto-oncogene, AP-1 transcription factor subunit	17511259	0.856	0.00348	Nucleus	transcription regulator	response to therapy
KHDRBS3	KH RNA binding domain containing, signal transduction associated 3	17312054	0.541	0.0472	Nucleus	other
KIF11	kinesin family member 11	17359020	1.018	0.038	Nucleus	other		4SC-205,ALN-VSP02,AZD4877,filanesib,ispinesib,litronesib,MK-0731,SB-743921
KIF15	kinesin family member 15	17523494	0.765	0.0131	Nucleus	other
KIF22	kinesin family member 22	17496568	0.656	0.0139	Nucleus	other	diagnosis,prognosis
KIF20B	kinesin family member 20B	17358838	0.982	0.0165	Nucleus	enzyme
KIF2C	kinesin family member 2C	17428803	0.962	0.0142	Nucleus	other
KLF2	Kruppel like factor 2	17502440	-0.989	0.0328	Nucleus	transcription regulator
KLF7	Kruppel like factor 7	17223766	-0.531	0.0451	Nucleus	transcription regulator
KLF12	Kruppel like factor 12	17309099	-1.307	0.00242	Nucleus	transcription regulator
KLF15	Kruppel like factor 15	17460826	-1.036	0.0153	Nucleus	transcription regulator
KNL1	kinetochore scaffold 1	17374692	1.024	0.00807	Nucleus	other
KNTC1	kinetochore associated 1	17442332	0.772	0.00139	Nucleus	other
LITAF	lipopolysaccharide induced TNF factor	17328124	0.784	6.22e-05	Nucleus	transcription regulator
LMNB1	lamin B1	17350740	0.711	0.0167	Nucleus	other
LMNTD1	lamin tail domain containing 1	17472752	-0.814	0.0344	Nucleus	other
LSM7	LSM7 homolog, U6 small nuclear RNA and mRNA degradation associated	17234800	0.615	0.0331	Nucleus	other
MAD2L1	mitotic arrest deficient 2 like 1	17459236	0.969	0.00758	Nucleus	other
MAFB	MAF bZIP transcription factor B	17393868	1.394	0.000236	Nucleus	transcription regulator
MAML3	mastermind like transcriptional coactivator 3	17405154	-0.904	0.00595	Nucleus	transcription regulator
Mapk1ip1	mitogen-activated protein kinase 1 interacting protein 1	17497414	-0.618	0.0347	Nucleus	other
MAPKAPK3	MAPK activated protein kinase 3	17530863	0.627	0.000868	Nucleus	kinase	unspecified application
MBD6	methyl-CpG binding domain protein 6	17245831	-0.618	0.0449	Nucleus	other
MCM5	minichromosome maintenance complex component 5	17502583	0.646	0.0325	Nucleus	enzyme	disease progression
MCM6	minichromosome maintenance complex component 6	17226550	0.793	0.0062	Nucleus	enzyme
MECOM	MDS1 and EVI1 complex locus	17404503	-0.588	0.0419	Nucleus	transcription regulator	prognosis
MED10	mediator complex subunit 10	17288414	0.677	0.0427	Nucleus	other
Meis1	Meis homeobox 1	17260815	-0.863	0.000267	Nucleus	transcription regulator
MGMT	O-6-methylguanine-DNA methyltransferase	17484271	0.516	0.0352	Nucleus	enzyme	diagnosis,efficacy,prognosis	O6-alkylguanine-DNA alkyltransferase inhibitor,O6-benzylguanine
MIS18BP1	MIS18 binding protein 1	17281428	0.994	0.0179	Nucleus	other
MITF	melanocyte inducing transcription factor	17461132	0.673	0.00467	Nucleus	transcription regulator	unspecified application
MKI67	marker of proliferation Ki-67	17497334	1.297	0.0177	Nucleus	other	diagnosis,disease progression,efficacy,prognosis,response to therapy,unspecified application
MLIP	muscular LMNA interacting protein	17528947	-0.801	0.0142	Nucleus	transcription regulator
MMS22L	MMS22 like, DNA repair protein	17412237	0.627	0.0223	Nucleus	other
MSRB1	methionine sulfoxide reductase B1	17334419	1.119	0.00552	Nucleus	enzyme
MUSTN1	musculoskeletal, embryonic nuclear protein 1	17298262	-0.599	0.0261	Nucleus	other
Mx1	MX dynamin-like GTPase 1	17332531	1.092	0.00238	Nucleus	enzyme
Mx2	MX dynamin-like GTPase 2	17327557	0.79	0.0345	Nucleus	enzyme
MYB	MYB proto-oncogene, transcription factor	17239664	-0.71	0.0148	Nucleus	transcription regulator
MYC	MYC proto-oncogene, bHLH transcription factor	17311846	0.936	6.85e-05	Nucleus	transcription regulator	diagnosis,efficacy,prognosis,response to therapy,unspecified application	AVI-4126,MYC-targeting siRNA DCR-MYC
MYOF	myoferlin	17364280	0.689	0.00478	Nucleus	other
NABP1	nucleic acid binding protein 1	17222825	0.783	0.00743	Nucleus	other
NAV2	neuron navigator 2	17478301	-0.926	0.000893	Nucleus	other
NCAPD2	non-SMC condensin I complex subunit D2	17471023	0.529	0.038	Nucleus	other
NCAPG2	non-SMC condensin II complex subunit G2	17279608	1.019	0.00588	Nucleus	other
NCAPG	non-SMC condensin I complex subunit G	17437278	0.733	0.0252	Nucleus	other
NCOA4	nuclear receptor coactivator 4	17298510	0.545	0.0477	Nucleus	transcription regulator
NDC80	NDC80 kinetochore complex component	17347042	1.19	0.00589	Nucleus	other
NDRG1	N-myc downstream regulated 1	17317652	0.695	0.0371	Nucleus	kinase
NEK6	NIMA related kinase 6	17370455	0.908	0.000211	Nucleus	kinase
NFIA	nuclear factor I A	17415606	-0.708	0.00658	Nucleus	transcription regulator
NFIX	nuclear factor I X	17511142	-0.635	0.045	Nucleus	transcription regulator
NFKBIE	NFKB inhibitor epsilon	17337927	0.637	0.0473	Nucleus	transcription regulator
NME2	NME/NM23 nucleoside diphosphate kinase 2	17267794	0.743	0.0293	Nucleus	kinase
NOCT	nocturnin	17397426	0.703	0.000572	Nucleus	transcription regulator
NOP56	NOP56 ribonucleoprotein	17376272	1.559	0.0443	Nucleus	other
NR1D1	nuclear receptor subfamily 1 group D member 1	17268884	-1.549	0.000572	Nucleus	ligand-dependent nuclear receptor
NR2C2AP	nuclear receptor 2C2 associated protein	17501810	0.64	0.00309	Nucleus	other
NR3C2	nuclear receptor subfamily 3 group C member 2	17502626	-0.646	0.0122	Nucleus	ligand-dependent nuclear receptor		aldosterone receptor antagonist,AZD9977,beta-estradiol/progesterone,drospirenone,drospirenone/ethinyl estradiol,eplerenone,fludrocortisone,fludrocortisone acetate,hydrochlorothiazide/spironolactone,progesterone,spironolactone
NR4A2	nuclear receptor subfamily 4 group A member 2	17385374	-1.066	0.0369	Nucleus	ligand-dependent nuclear receptor
NUF2	NUF2 component of NDC80 kinetochore complex	17229433	1.533	0.00635	Nucleus	other
NUP205	nucleoporin 205	17457249	0.589	0.0223	Nucleus	other
NUSAP1	nucleolar and spindle associated protein 1	17374833	1.094	0.00716	Nucleus	other
PARP3	poly(ADP-ribose) polymerase family member 3	17530703	0.566	0.0404	Nucleus	enzyme		bevacizumab/olaparib,olaparib,rucaparib
PCBD1	pterin-4 alpha-carbinolamine dehydratase 1	17233669	0.738	0.0497	Nucleus	transcription regulator
PEG3	paternally expressed 3	17486110	-0.8	0.00227	Nucleus	kinase	diagnosis
PELO	pelota mRNA surveillance and ribosome rescue factor	17296422	-0.558	0.0232	Nucleus	other
PHF1	PHD finger protein 1	17335000	-0.547	0.0275	Nucleus	transcription regulator
PHF11	PHD finger protein 11	17307280	1.143	0.000242	Nucleus	other
PLAC8	placenta associated 8	17450121	0.84	0.0493	Nucleus	other
PLAGL1	PLAG1 like zinc finger 1	17231694	-0.655	0.00728	Nucleus	transcription regulator
Platr21	pluripotency associated transcript 21	17544845	-0.539	0.0191	Nucleus	other
PLK1	polo like kinase 1	17482739	0.943	0.00818	Nucleus	kinase	unspecified application	BI 2536,GSK461364,lipid encapsulated anti-PLK1 siRNA TKM-080301,MK1496,onvansertib,rigosertib,TAK-960,volasertib
PLK3	polo like kinase 3	17428766	0.521	0.0282	Nucleus	kinase
PNP	purine nucleoside phosphorylase	17299559	0.534	0.0423	Nucleus	enzyme		forodesine,PD 141955,purine nucleoside phosphorylase inhibitor
POLE2	DNA polymerase epsilon 2, accessory subunit	17281506	0.744	0.0105	Nucleus	enzyme		bortezomib/cladribine/rituximab,cladribine,cladribine/cytarabine/daunorubicin,cladribine/cytarabine/decitabine,cladribine/cytarabine/filgrastim,cladribine/cytarabine/filgrastim/idarubicin,cladribine/cytarabine/filgrastim/idarubicin/plerixafor,cladribine/cytarabine/filgrastim/mitoxantrone,cladribine/peginterferon alfa-2a,cladribine/recombinant interferon,cladribine/rituximab
POLE	DNA polymerase epsilon, catalytic subunit	17440465	0.696	0.0448	Nucleus	enzyme		bortezomib/cladribine/rituximab,cladribine,cladribine/cytarabine/daunorubicin,cladribine/cytarabine/decitabine,cladribine/cytarabine/filgrastim,cladribine/cytarabine/filgrastim/idarubicin,cladribine/cytarabine/filgrastim/idarubicin/plerixafor,cladribine/cytarabine/filgrastim/mitoxantrone,cladribine/peginterferon alfa-2a,cladribine/recombinant interferon,cladribine/rituximab,clofarabine,clofarabin…
PPP2R3A	protein phosphatase 2 regulatory subunit B''alpha	17530159	-0.752	0.038	Nucleus	phosphatase
PRC1	protein regulator of cytokinesis 1	17479575	1.283	0.018	Nucleus	other
PRDM6	PR/SET domain 6	17350639	-0.76	0.00811	Nucleus	transcription regulator
PRDM8	PR/SET domain 8	17439511	-1.148	0.00426	Nucleus	transcription regulator
PRICKLE1	prickle planar cell polarity protein 1	17320720	-0.793	0.000868	Nucleus	other
PRICKLE2	prickle planar cell polarity protein 2	17469121	-0.682	0.00945	Nucleus	other
PRX	periaxin	17475603	-0.697	0.0375	Nucleus	other
PSMB6	proteasome 20S subunit beta 6	17252070	0.607	0.023	Nucleus	peptidase
R3HDM2	R3H domain containing 2	17238002	-0.536	0.038	Nucleus	other
RAG1	recombination activating 1	17388683	-0.628	0.0155	Nucleus	enzyme
RAN	RAN, member RAS oncogene family	17442823	0.847	0.00631	Nucleus	enzyme
RARG	retinoic acid receptor gamma	17322181	-0.512	0.0132	Nucleus	ligand-dependent nuclear receptor		6-mercaptopurine/methotrexate/tretinoin,acitretin,adapalene,AGN 190299,alitretinoin,arsenic trioxide/daunorubicin/tretinoin,arsenic trioxide/gemtuzumab ozogamicin/tretinoin,arsenic trioxide/idarubicin/tretinoin,arsenic trioxide/tretinoin,cytarabine/daunorubicin/gemtuzumab ozogamicin/tretinoin,cytarabine/daunorubicin/tretinoin,cytarabine/idarubicin/tretinoin,daunorubicin/tretinoin,doxorubicin/tret…
RAVER2	ribonucleoprotein, PTB binding 2	17415897	-0.657	0.00139	Nucleus	other
RBL1	RB transcriptional corepressor like 1	17393684	0.552	0.0385	Nucleus	transcription regulator
RCAN1	regulator of calcineurin 1	17332228	0.713	0.0126	Nucleus	other
RFC2	replication factor C subunit 2	17443114	0.565	0.0208	Nucleus	other
RFC5	replication factor C subunit 5	17451867	0.564	0.0122	Nucleus	enzyme
RNF144A	ring finger protein 144A	17280315	-0.859	0.00227	Nucleus	enzyme
RPL3	ribosomal protein L3	17319403	0.618	0.0298	Nucleus	other		cytarabine/doxorubicin/filgrastim/omacetaxine mepesuccinate,omacetaxine mepesuccinate
RPL6	ribosomal protein L6	17441808	0.982	0.0443	Nucleus	other	unspecified application
RRM1	ribonucleotide reductase catalytic subunit M1	17481102	1.025	0.0237	Nucleus	enzyme	efficacy,response to therapy	5-fluorouracil/gemcitabine,alemtuzumab/cyclophosphamide/fludarabine phosphate,alemtuzumab/cyclophosphamide/fludarabine phosphate/mitoxantrone,alemtuzumab/cyclophosphamide/fludarabine phosphate/rituximab,alemtuzumab/fludarabine phosphate,bevacizumab/gemcitabine,bortezomib/cladribine/rituximab,bosutinib/hydroxyurea/ponatinib,capecitabine/docetaxel/gemcitabine,capecitabine/gemcitabine,cetuximab/gemc…
RRM2	ribonucleotide reductase regulatory subunit M2	17274540	0.813	0.0116	Nucleus	enzyme		5-fluorouracil/gemcitabine,alemtuzumab/cyclophosphamide/fludarabine phosphate,alemtuzumab/cyclophosphamide/fludarabine phosphate/mitoxantrone,alemtuzumab/cyclophosphamide/fludarabine phosphate/rituximab,alemtuzumab/fludarabine phosphate,bevacizumab/gemcitabine,bortezomib/cladribine/rituximab,capecitabine/docetaxel/gemcitabine,capecitabine/gemcitabine,chlorambucil/fludarabine phosphate,cladribine,…
RUNX1T1	RUNX1 partner transcriptional co-repressor 1	17411918	-0.697	0.0231	Nucleus	transcription regulator
SAP30	Sin3A associated protein 30	17509455	0.548	0.027	Nucleus	transcription regulator	unspecified application
SIX5	SIX homeobox 5	17474480	-0.752	0.00208	Nucleus	transcription regulator
Slfn1	schlafen 1	17254171	0.732	0.0269	Nucleus	enzyme
SLFN13	schlafen family member 13	17266851	1.941	0.00132	Nucleus	enzyme
SMAD6	SMAD family member 6	17528125	-0.832	0.0342	Nucleus	transcription regulator	unspecified application
SMARCA2	SWI/SNF related, matrix associated, actin dependent regulator of chromatin, subfamily a, member 2	17358375	-0.796	0.0114	Nucleus	transcription regulator
SMC2	structural maintenance of chromosomes 2	17414114	0.784	0.0165	Nucleus	transporter
SNRNP25	small nuclear ribonucleoprotein U11/U12 subunit 25	17248242	0.629	0.00236	Nucleus	other
SOX11	SRY-box transcription factor 11	17280350	-0.775	0.0158	Nucleus	transcription regulator	unspecified application
SOX13	SRY-box transcription factor 13	17226974	-0.587	0.00542	Nucleus	transcription regulator
SPDL1	spindle apparatus coiled-coil protein 1	17261710	0.698	0.0208	Nucleus	other
Speer4a (includes others)	spermatogenesis associated glutamate (E)-rich protein 4A	17445667	0.776	0.0042	Nucleus	other
SPEN	spen family transcriptional repressor	17432202	-0.55	0.0388	Nucleus	transcription regulator
SPI1	Spi-1 proto-oncogene	17373177	0.767	0.00612	Nucleus	transcription regulator
STIL	STIL centriolar assembly protein	17417117	0.957	0.0302	Nucleus	other
SYNE1	spectrin repeat containing nuclear envelope protein 1	17238918	-1.199	0.00655	Nucleus	other
SYNE2	spectrin repeat containing nuclear envelope protein 2	17276396	-0.667	0.00399	Nucleus	other
TACC3	transforming acidic coiled-coil containing protein 3	17436457	0.787	0.00139	Nucleus	other
TAF1D	TATA-box binding protein associated factor, RNA polymerase I subunit D	17514824	1.241	0.038	Nucleus	other
TBX2	T-box transcription factor 2	17254591	-0.688	0.00529	Nucleus	transcription regulator
TBX3	T-box transcription factor 3	17441595	-1.053	0.000159	Nucleus	transcription regulator
TCF19	transcription factor 19	17344336	0.653	0.0178	Nucleus	transcription regulator
TDG	thymine DNA glycosylase	17313595	0.538	0.0312	Nucleus	enzyme
TEF	TEF transcription factor, PAR bZIP family member	17313376	-0.742	0.0223	Nucleus	transcription regulator
TET1	tet methylcytosine dioxygenase 1	17241512	-0.508	0.0381	Nucleus	enzyme
TET3	tet methylcytosine dioxygenase 3	17468157	-0.595	0.0241	Nucleus	enzyme
TFDP1	transcription factor Dp-1	17499310	0.612	0.0294	Nucleus	transcription regulator
TFEC	transcription factor EC	17464950	1.466	0.00131	Nucleus	transcription regulator
THRA	thyroid hormone receptor alpha	17256138	-0.766	0.000212	Nucleus	ligand-dependent nuclear receptor		3,5-diiodothyropropionic acid,amiodarone,denosumab/levothyroxine,dextrothyroxine,L-triiodothyronine,levothyroxine,levothyroxine/l-triiodothyronine
THYN1	thymocyte nuclear protein 1	17515566	0.538	0.0312	Nucleus	other
TLE2	TLE family member 2, transcriptional corepressor	17235757	-0.772	0.00949	Nucleus	transcription regulator
TMA16	translation machinery associated 16 homolog	17509697	0.797	0.0192	Nucleus	other
TOP2A	DNA topoisomerase II alpha	17268909	1.59	0.00407	Nucleus	enzyme	diagnosis,efficacy,prognosis,response to therapy	alemtuzumab/cyclophosphamide/fludarabine phosphate/mitoxantrone,AQ4N,arsenic trioxide/daunorubicin/tretinoin,arsenic trioxide/idarubicin/tretinoin,becatecarin,bevacizumab/etoposide,bortezomib/dexamethasone/doxorubicin,bortezomib/doxorubicin,capecitabine/epirubicin/oxaliplatin,carboplatin/doxorubicin,chlorambucil/epirubicin,chlorambucil/mitoxantrone/prednisone,chlorambucil/mitoxantrone/prednisone/…
TOX3	TOX high mobility group box family member 3	17511550	-0.697	0.00893	Nucleus	other
TPX2	TPX2 microtubule nucleation factor	17377793	1.061	0.0232	Nucleus	other
TRPS1	transcriptional repressor GATA binding 1	17316977	0.605	0.0478	Nucleus	transcription regulator	diagnosis,prognosis
TYMS	thymidylate synthetase	17446627	0.574	0.0302	Nucleus	enzyme	diagnosis,disease progression,efficacy,prognosis,response to therapy	1843U89,5-fluorouracil,5-fluorouracil/gemcitabine,5-fluorouracil/imiquimod,5-fluorouracil/irinotecan,5-fluorouracil/irinotecan/oxaliplatin,5-fluorouracil/oxaliplatin,bevacizumab/5-fluorouracil,bevacizumab/5-fluorouracil/irinotecan/oxaliplatin,bevacizumab/capecitabine,bevacizumab/capecitabine/irinotecan,bevacizumab/capecitabine/irinotecan/oxaliplatin,bevacizumab/capecitabine/oxaliplatin,bevacizuma…
UTP14A	UTP14A small subunit processome component	17534569	0.604	0.048	Nucleus	other
VAV1	vav guanine nucleotide exchange factor 1	17338982	0.95	0.0027	Nucleus	transcription regulator
ZBTB4	zinc finger and BTB domain containing 4	17251728	-0.725	0.00214	Nucleus	transcription regulator
ZBTB20	zinc finger and BTB domain containing 20	17325723	-1.047	0.0204	Nucleus	transcription regulator
ZDHHC1	zinc finger DHHC-type containing 1	17512440	-0.65	0.0174	Nucleus	enzyme
ZFHX3	zinc finger homeobox 3	17505313	-0.619	0.0439	Nucleus	transcription regulator
ZMAT3	zinc finger matrin-type 3	17404585	0.674	0.00371	Nucleus	other
ZNF319	zinc finger protein 319	17511992	-0.723	0.0132	Nucleus	transcription regulator
ZNF616	zinc finger protein 616	17421476	1.028	0.00339	Nucleus	transcription regulator
ZNF385A	zinc finger protein 385A	17322359	0.906	0.0157	Nucleus	other
ZNF705A	zinc finger protein 705A	17462729	1.213	0.00661	Nucleus	transcription regulator
ZRANB3	zinc finger RANBP2-type containing 3	17226499	0.893	0.000264	Nucleus	enzyme
ZWILCH	zwilch kinetochore protein	17528137	0.783	0.0148	Nucleus	other
0610043K17Rik	RIKEN cDNA 0610043K17 gene	17415922	-0.687	0.00674	Other	other
1500002C15Rik	RIKEN cDNA 1500002C15 gene	17433858	-0.631	0.0142	Other	other
1700086D15Rik	--	17264153	-0.646	0.0442	Other	other
2310067E19Rik	RIKEN cDNA 2310067E19 gene	17426784	-0.626	0.0462	Other	other
2610005L07Rik	cadherin 11 pseudogene	17499676	-0.917	0.0369	Other	other
2610027K06Rik	RIKEN cDNA 2610027K06 gene	17267190	-0.643	0.00838	Other	other
2610524H06Rik	RIKEN cDNA 2610524H06 gene	17451614	1.191	0.00305	Other	other
4930522O17Rik	RIKEN cDNA 4930522O17 gene	17414184	-0.603	0.04	Other	other
4930578N18Rik	RIKEN cDNA 4930578N18 gene	17326654	0.512	0.0352	Other	other
5031426D15Rik	RIKEN cDNA 5031426D15 gene	17381509	-0.888	0.00455	Other	other
5930403L14Rik	RIKEN cDNA 5930403L14 gene	17433656	-0.526	0.0122	Other	other
8430431K14Rik	RIKEN cDNA 8430431K14 gene	17363925	-1.061	0.0144	Other	other
9030622O22Rik	RIKEN cDNA 9030622O22 gene	17392549	-0.757	0.00169	Other	other
9130230L23Rik	RIKEN cDNA 9130230L23 gene	17448376	-0.634	0.0142	Other	other
9430065F17Rik	RIKEN cDNA 9430065F17 gene	17288324	-0.685	0.0422	Other	other
9530026P05Rik	RIKEN cDNA 9530026P05 gene	17461060	-1.212	0.0143	Other	other
9530091C08Rik	RIKEN cDNA 9530091C08 gene	17518933	-0.607	0.0448	Other	other
A330023F24Rik	RIKEN cDNA A330023F24 gene	17221026	-0.803	0.0418	Other	other
A530020G20Rik	RIKEN cDNA A530020G20 gene	17402165	-0.607	0.0379	Other	other
A930012L18Rik	RIKEN cDNA A930012L18 gene	17350295	-1.11	0.0124	Other	other
AFAP1L1	actin filament associated protein 1 like 1	17354810	-0.817	0.00843	Other	other	unspecified application
Akr1c12/Akr1c13	aldo-keto reductase family 1, member C13	17284936	0.809	0.0434	Other	enzyme
ALKAL1	ALK and LTK ligand 1	17210947	1.209	0.00681	Other	other
Arhgef38	Rho guanine nucleotide exchange factor (GEF) 38	17410472	-0.895	0.00447	Other	other
ARL11	ADP ribosylation factor like GTPase 11	17301108	1.029	0.0017	Other	other
ARMCX4	armadillo repeat containing X-linked 4	17537730	0.569	0.0419	Other	other
B130024G19Rik	RIKEN cDNA B130024G19 gene	17479148	-0.634	0.0429	Other	other
B430010I23Rik	RIKEN cDNA B430010I23 gene	17500744	-1.359	0.00024	Other	other
B430306N03Rik	RIKEN cDNA B430306N03 gene	17338403	0.816	0.0126	Other	other
BAHCC1	BAH domain and coiled-coil containing 1	17259276	-0.523	0.0296	Other	other
BC039771	cDNA sequence BC039771	17377170	-0.604	0.0162	Other	other
BC147527	cDNA sequence BC147527	17290205	0.763	0.0372	Other	other
BEX1	brain expressed X-linked 1	17544691	-1.094	0.0195	Other	other
C87198	expressed sequence C87198	17275596	-1.116	0.00248	Other	other
C030017K20Rik	RIKEN cDNA C030017K20 gene	17422546	-0.891	0.00922	Other	other
C12orf56	chromosome 12 open reading frame 56	17237732	-0.524	0.0275	Other	other
C130026I21Rik (includes others)	RIKEN cDNA C130026I21 gene	17366201	1.141	0.000659	Other	other
C430002N11Rik	RIKEN cDNA C430002N11 gene	17520582	0.954	0.0247	Other	other
CACUL1	CDK2 associated cullin domain 1	17548127	0.615	0.0234	Other	other
CCDC34	coiled-coil domain containing 34	17374121	0.581	0.00916	Other	other
CCDC122	coiled-coil domain containing 122	17302102	0.991	0.0368	Other	other
CCDC85A	coiled-coil domain containing 85A	17261233	-0.793	0.00607	Other	other
CCL27	C-C motif chemokine ligand 27	17434221	-1.073	5.34e-05	Other	other
CCM2L	CCM2 like scaffold protein	17377857	-0.826	0.0101	Other	other
CERCAM	cerebral endothelial cell adhesion molecule	17368930	0.597	0.0343	Other	other
Clec4a3	C-type lectin domain family 4, member a3	17462738	0.944	0.0315	Other	other
CLIP4	CAP-Gly domain containing linker protein family member 4	17339529	0.589	0.0404	Other	other
Cstdc2	cystatin domain containing 2	17392600	-0.839	0.0202	Other	other
CYYR1	cysteine and tyrosine rich 1	17331692	-0.693	0.00662	Other	other
D730003I15Rik	RIKEN cDNA D730003I15 gene	17220794	-0.675	0.0267	Other	other
E030013I19Rik	RIKEN cDNA E030013I19 gene	17367031	-0.508	0.0135	Other	other
E330011O21Rik	RIKEN cDNA E330011O21 gene	17331585	0.648	0.0446	Other	other
E330033B04Rik	RIKEN cDNA E330033B04 gene	17320885	-0.884	0.0263	Other	other
EFCC1	EF-hand and coiled-coil domain containing 1	17460558	-0.625	0.0147	Other	other
EFHD2	EF-hand domain family member D2	17432341	0.563	0.00478	Other	other
EPSTI1	epithelial stromal interaction 1	17302141	1.151	0.000868	Other	other
FAM110D	family with sequence similarity 110 member D	17431266	0.615	0.00853	Other	other
Fendrr	Foxf1 adjacent non-coding developmental regulatory RNA	17513550	-1.501	0.0041	Other	other
GAS5	growth arrest specific 5	17218653	0.76	0.0234	Other	other
GAS2L3	growth arrest specific 2 like 3	17244057	1.244	0.000209	Other	other
GASK1A	golgi associated kinase 1A	17523387	-0.557	0.0294	Other	other
Gm830	predicted gene 830	17427322	-0.559	0.0183	Other	other
Gm5086	predicted gene 5086	17289388	0.784	0.0287	Other	other
Gm5176	high mobility group box 2 pseudogene	17237275	-0.806	0.0331	Other	other
Gm5431	predicted gene 5431	17262209	1.118	0.0193	Other	other
Gm5859	family with sequence similarity 205 pseudogene	17412952	-1.008	0.0455	Other	other
Gm6929	predicted gene 6929	17486515	0.647	0.0461	Other	other
Gm7592	predicted gene 7592	17548926	1.604	0.00176	Other	other
Gm8995	predicted gene 8995	17494674	0.868	0.0208	Other	other
Gm9917	--	17530915	-1.016	0.00534	Other	other
Gm10400	predicted gene 10400	17464061	-1.428	0.00371	Other	other
Gm10415	predicted gene 10415	17471146	1.324	0.00162	Other	other
Gm10855	predicted gene 10855	17381511	-0.862	0.00799	Other	other
Gm11944	predicted gene 11944	17246569	-0.749	0.0369	Other	other
Gm12474	predicted gene 12474	17400994	-1.289	0.00462	Other	other
Gm13387	predicted gene 13387	17382378	-1.374	0.000868	Other	other
Gm13816	predicted gene 13816	17373527	-0.818	0.00347	Other	other
Gm15998	--	17399404	-0.667	0.0481	Other	other
Gm19765	predicted gene, 19765	17480924	0.854	0.0121	Other	other
Gm20257	caspase 8 pseudogene	17213189	-1.091	0.0456	Other	other
Gm20300	predicted gene, 20300	17240043	-0.751	0.0381	Other	other
Gm20554	predicted gene, 20554	17294228	-0.918	0.00848	Other	other
Gm20753	predicted gene, 20753	17226039	-0.501	0.0437	Other	other
Gm21057	predicted gene, 21057	17492474	-0.713	0.045	Other	other
Gm22067	Predicted gene, 22067	17313320	-0.779	0.0438	Other	other
Gm22149	predicted gene, 22149	17282397	-0.825	0.0137	Other	other
Gm22270	Predicted gene, 22270	17440132	2.124	0.0467	Other	other
Gm22303	Predicted gene, 22303	17274247	1.18	0.0119	Other	other
Gm22334	predicted gene, 22334	17393334	-1.019	0.00447	Other	other
Gm22358	Predicted gene, 22358	17291353	0.988	0.0296	Other	other
Gm23041	Predicted gene, 23041	17244862	1.427	0.0302	Other	other
Gm23169	Predicted gene, 23169	17221345	-1.364	0.0196	Other	other
Gm23199	Predicted gene, 23199	17538186	-1.295	0.0346	Other	other
Gm23258	Predicted gene, 23258	17534980	-1.5	0.045	Other	other
Gm23458	Predicted gene, 23458	17442282	-1.011	0.0243	Other	other
Gm23482	predicted gene, 23482	17287245	-1.015	0.0149	Other	other
Gm23527	predicted gene, 23527	17470029	-0.962	0.0375	Other	other
Gm23692	Predicted gene, 23692	17327426	-0.686	0.0393	Other	other
Gm23859	Predicted gene, 23859	17352343	-1.042	0.0314	Other	other
Gm24655	Predicted gene, 24655	17239742	0.668	0.04	Other	other
Gm25135	Predicted gene, 25135	17337794	-1.295	0.0383	Other	other
Gm25604	predicted gene, 25604	17430153	-0.557	0.0215	Other	other
Gm25831	Predicted gene, 25831	17309061	-0.911	0.0155	Other	other
Gm25835	Predicted gene, 25835	17264863	1.485	0.0327	Other	other
Gm25915	predicted gene, 25915	17545073	0.639	0.0399	Other	other
Gm26387	Predicted gene, 26387	17440134	0.788	0.0302	Other	other
Gm26437	Predicted gene, 26437	17541227	1.023	0.0362	Other	other
Gm26495	Predicted gene, 26495	17237490	-1.16	0.0132	Other	other
Gm26671	predicted gene, 26671	17405375	-0.508	0.0399	Other	other
Gm26910	predicted gene, 26910	17355248	-0.713	0.0209	Other	other
Gm29609	predicted gene 29609	17446851	-0.675	0.0318	Other	other
Gm32819	predicted gene, 32819	17517215	-0.782	0.0224	Other	other
Gm20878 (includes others)	predicted gene, 21953	17412979	-0.695	0.00311	Other	other
Gm21188/Gm36079	predicted gene, 21188	17296558	1.438	5.34e-05	Other	other
Gm5148/Rps23rg1	ribosomal protein S23, retrogene 1	17404923	-0.85	0.0317	Other	other
GRTP1	growth hormone regulated TBC protein 1	17507559	-0.775	0.00481	Other	other
H2-T22	histocompatibility 2, T region locus 22	17344593	0.689	0.00888	Other	other
Hmga2-ps1	high mobility group AT-hook 2, pseudogene 1	17230225	0.689	0.0341	Other	other
Ighv1-55	immunoglobulin heavy variable 1-55	17284585	0.704	0.0473	Other	other
Ighv1-84	immunoglobulin heavy variable 1-84	17284664	-1.312	0.0378	Other	other
Ighv2-9	immunoglobulin heavy variable 2-9	17284426	1.727	0.00298	Other	other
Igkv12-89	immunoglobulin kappa chain variable 12-89	17467404	2.566	0.0488	Other	other
Igkv3-12	immunoglobulin kappa variable 3-12	17459389	-1.955	0.0354	Other	other
ITPRID1	ITPR interacting domain containing 1	17458866	-1.342	0.00124	Other	other
Kantr	Kdm5c adjacent non-coding transcript	17545430	-0.58	0.0421	Other	other
KCTD21	potassium channel tetramerization domain containing 21	17480324	-0.564	0.044	Other	other
KIAA0895	KIAA0895	17515436	0.852	0.000261	Other	other
KIAA0930	KIAA0930	17320019	0.641	0.00334	Other	other
KLHL6	kelch like family member 6	17329063	0.523	0.018	Other	other
LOC115485611	small nucleolar RNA SNORA3/SNORA45 family	17481682	2.387	0.0158	Other	other
LOC115488691	small nucleolar RNA SNORA4	17324402	1.877	0.0187	Other	other
LOC115488693	small nucleolar RNA SNORA32	17326982	1.265	0.0254	Other	other
LOC115489602	small nucleolar RNA SNORA8	17369950	-1.515	0.000295	Other	other
LRRC25	leucine rich repeat containing 25	17501989	0.965	0.000116	Other	other
Lrrc74b	leucine rich repeat containing 74B	17328728	-0.717	0.0296	Other	other
MAGIX	MAGI family member, X-linked	17539888	-0.536	0.0147	Other	other
MFSD1	major facilitator superfamily domain containing 1	17398180	0.768	0.0145	Other	transporter
mir-297	microRNA 297	17366734	-1.265	0.0305	Other	microRNA
MS4A7	membrane spanning 4-domains A7	17362953	2.457	5.88e-06	Other	other
Ms4a14	membrane-spanning 4-domains, subfamily A, member 14	17362941	2.186	5.34e-05	Other	other
MS4A6A	membrane spanning 4-domains A6A	17362973	2.221	0.00227	Other	other
Ms4a6b	membrane-spanning 4-domains, subfamily A, member 6B	17357688	1.143	0.0042	Other	other
MYBPHL	myosin binding protein H like	17401699	-0.693	0.0181	Other	other
MYOZ2	myozenin 2	17410022	-1.692	0.000371	Other	other	unspecified application
n-R5s33	Nuclear encoded rRNA 5S 33	17324959	1.714	0.00714	Other	other
n-R5s136	nuclear encoded rRNA 5S 136	17513976	2.008	0.00609	Other	other
n-R5s151	nuclear encoded rRNA 5S 151	17474128	1.908	0.00999	Other	other
n-R5s195	Nuclear encoded rRNA 5S 195	17404963	1.003	0.0285	Other	other
NCKAP5	NCK associated protein 5	17226447	-0.791	0.0278	Other	other
Nlrp1c-ps	NLR family, pyrin domain containing 1C, pseudogene	17265526	0.897	0.0151	Other	other
Olfr1372-ps1	olfactory receptor 1372, pseudogene 1	17262596	0.85	0.00684	Other	other
OTULINL	OTU deubiquitinase with linear linkage specificity like	17316197	0.577	0.0429	Other	other
Peak1os	pseudopodium-enriched atypical kinase 1, opposite strand	17517573	1.158	0.00169	Other	other
Peg13	paternally expressed 13	17317835	-0.677	0.0155	Other	other
PHF24	PHD finger protein 24	17413173	-0.531	0.0415	Other	other
PIEZO2	piezo type mechanosensitive ion channel component 2	17354906	-0.82	0.00393	Other	ion channel
PKIB	cAMP-dependent protein kinase inhibitor beta	17233373	0.679	0.00458	Other	other
PPIL6	peptidylprolyl isomerase like 6	17232881	-1.109	0.0196	Other	enzyme
PROB1	proline rich basic protein 1	17353626	-0.8	0.00169	Other	other
Proser3	proline and serine rich 3	17489124	-0.611	0.0425	Other	other
PRR11	proline rich 11	17267454	1.306	0.00253	Other	other
RASSF4	Ras association domain family member 4	17470060	0.778	0.00447	Other	other
Rnu3a	U3A small nuclear RNA	17232731	2.3	0.0289	Other	other
Rpl27-ps1	ribosomal protein L27, pseudogene 1	17229727	0.564	0.032	Other	other
Rpl7a-ps10	ribosomal protein L7A, pseudogene 10	17520602	0.823	0.000868	Other	other
Rps15a-ps5	ribosomal protein S15A, pseudogene 5	17450527	0.67	0.0291	Other	other
Rps19-ps3	ribosomal protein S19, pseudogene 3	17432781	0.807	0.0189	Other	other
Rps2-ps5	ribosomal protein S2, pseudogene 5	17301603	0.694	0.00865	Other	other
Rptoros	regulatory associated protein of MTOR, complex 1, opposite strand	17272934	-0.742	0.00244	Other	other
SBNO2	strawberry notch homolog 2	17242785	0.767	0.00329	Other	transcription regulator
Scarletltr	Scarletltr, erythroid developmental long intergenic non-protein coding transcript	17518274	-0.65	0.0234	Other	other
Scarna9	small Cajal body-specific RNA 9	17524206	1.289	0.0455	Other	other
Sfta3-ps	surfactant associated 3, pseudogene	17281291	-0.837	0.00807	Other	other
SLC10A5	solute carrier family 10 member 5	17404122	-1.15	0.0068	Other	other
Slc2a4rg-ps	Slc2a4 regulator, pseudogene	17381035	-0.576	0.0271	Other	other
SLFN12L	schlafen family member 12 like	17254176	1.421	0.000365	Other	enzyme
Snhg6	small nucleolar RNA host gene 6	17221186	1.01	0.0057	Other	other
Snhg15	small nucleolar RNA host gene 15	17260396	0.683	0.00773	Other	other
Snora33	small nucleolar RNA, H/ACA box 33	17239751	1.422	0.0212	Other	other
Snora36b	small nucleolar RNA, H/ACA box 36B	17220526	1.802	0.0472	Other	other
SNORD22	small nucleolar RNA, C/D box 22	17357126	0.798	0.00772	Other	other
Snord93	small nucleolar RNA, C/D box 93	17435249	2.297	0.00185	Other	other
SNORD15A	small nucleolar RNA, C/D box 15A	17493683	1.46	0.0355	Other	other
SNX7	sorting nexin 7	17409826	1.031	0.0172	Other	transporter
SSU72	SSU72 homolog, RNA polymerase II CTD phosphatase	17422662	0.532	0.00865	Other	phosphatase
T2	brachyury 2	17333107	-0.547	0.0436	Other	other
Tas2r143	taste receptor, type 2, member 143	17457960	-0.8	0.0449	Other	other
TBKBP1	TBK1 binding protein 1	17268454	-0.582	0.0472	Other	other
Tbx3os1	T-box 3, opposite strand 1	17451936	-1.178	0.00573	Other	other
TCEAL9	transcription elongation factor A like 9	17537889	1.003	0.00447	Other	other
THEMIS2	thymocyte selection associated family member 2	17430906	0.818	0.00708	Other	other
TIFAB	TIFA inhibitor	17292990	0.562	0.0478	Other	other
TLNRD1	talin rod domain containing 1	17492943	-0.522	0.0369	Other	other
TM4SF19	transmembrane 4 L six family member 19	17324787	1.581	0.00101	Other	other
TMEM51	transmembrane protein 51	17432387	0.557	0.0179	Other	other
TMEM252	transmembrane protein 252	17358266	1.379	0.0041	Other	other
TMEM132D	transmembrane protein 132D	17453043	-0.668	0.00387	Other	other
Tmem181b-ps	transmembrane protein 181B, pseudogene	17340548	-0.6	0.0473	Other	other
TMEM86A	transmembrane protein 86A	17478263	0.773	0.00931	Other	other
TSPAN18	tetraspanin 18	17388435	-1.165	0.00399	Other	other
Ttc6	tetratricopeptide repeat domain 6	17275640	-0.789	0.0147	Other	other
TTC16	tetratricopeptide repeat domain 16	17383985	-0.551	0.0239	Other	other
TTC39C	tetratricopeptide repeat domain 39C	17348570	0.702	0.0026	Other	other
UBASH3B	ubiquitin associated and SH3 domain containing B	17525868	0.654	0.00853	Other	enzyme
UBTD1	ubiquitin domain containing 1	17359488	0.736	0.000868	Other	other
USHBP1	USH1 protein network component harmonin binding protein 1	17510295	-0.677	0.0231	Other	other
Wfdc17	WAP four-disulfide core domain 17	17254289	1.983	0.00169	Other	other
WSCD1	WSC domain containing 1	17252292	-0.678	0.0224	Other	other
Zfas1	zinc finger, NFX1-type containing 1, antisense RNA 1	17379871	1.177	0.0287	Other	other
Zfp986/Zfp993	zinc finger protein 986	17421444	0.76	0.0118	Other	other
Zfp989/Znf41-ps	ZNF41, pseudogene	17421384	0.702	0.0293	Other	other
ZNF641	zinc finger protein 641	17321202	-0.71	0.0108	Other	other
ABCA1	ATP binding cassette subfamily A member 1	17425301	0.575	0.0373	Plasma Membrane	transporter		probucol
Abcb1b	ATP-binding cassette, sub-family B (MDR/TAP), member 1B	17434555	1.536	7.26e-07	Plasma Membrane	transporter
ABCG1	ATP binding cassette subfamily G member 1	17335770	0.595	0.0373	Plasma Membrane	transporter	efficacy,unspecified application
ABHD12	abhydrolase domain containing 12, lysophospholipase	17392730	0.714	0.0173	Plasma Membrane	enzyme
ACE2	angiotensin I converting enzyme 2	17539494	-0.61	0.0296	Plasma Membrane	peptidase		hydrochlorothiazide/moexipril,moexipril
ACKR1	atypical chemokine receptor 1 (Duffy blood group)	17229984	0.701	0.0282	Plasma Membrane	G-protein coupled receptor
ACKR3	atypical chemokine receptor 3	17215605	0.798	0.00569	Plasma Membrane	G-protein coupled receptor
ACTR3	actin related protein 3	17226420	0.715	0.00755	Plasma Membrane	other	diagnosis
ACVRL1	activin A receptor like type 1	17315133	-0.673	0.0128	Plasma Membrane	kinase	diagnosis,unspecified application	panulisib,PF-3446962
ADAM8	ADAM metallopeptidase domain 8	17497525	0.967	0.000368	Plasma Membrane	peptidase	diagnosis
ADCY8	adenylate cyclase 8	17317533	-1.283	0.000256	Plasma Membrane	enzyme
ADCY9	adenylate cyclase 9	17327720	-0.547	0.0144	Plasma Membrane	enzyme
ADGRE1	adhesion G protein-coupled receptor E1	17339013	1.744	9.56e-05	Plasma Membrane	G-protein coupled receptor
ADGRE5	adhesion G protein-coupled receptor E5	17510948	-0.75	0.00246	Plasma Membrane	G-protein coupled receptor
ADGRF5	adhesion G protein-coupled receptor F5	17337770	-0.603	0.0385	Plasma Membrane	G-protein coupled receptor
ADRA1A	adrenoceptor alpha 1A	17301502	-1.291	0.000211	Plasma Membrane	G-protein coupled receptor		acetaminophen/caffeine/chlorpheniramine/hydrocodone/phenylephrine,acetaminophen/clemastine/pseudoephedrine,acetaminophen/dexbrompheniramine/pseudoephedrine,acrivastine/pseudoephedrine,alfuzosin,alpha-methyl dopa,antazoline/naphazoline,apraclonidine,arbutamine,aripiprazole,articaine/epinephrine,asenapine,azatadine/pseudoephedrine,benzphetamine,brimonidine,brimonidine/brinzolamide,brompheniramine/c…
ADRB1	adrenoceptor beta 1	17360599	-0.797	0.000474	Plasma Membrane	G-protein coupled receptor	prognosis,unspecified application	acebutolol,albuterol,alprenolol,amiodarone,arbutamine,articaine/epinephrine,atenolol,atenolol/chlorthalidone,bendroflumethiazide/nadolol,betaxolol,bimatoprost/timolol,bisoprolol,bisoprolol/hydrochlorothiazide,bopindolol,bupivacaine/epinephrine,bupranolol,carteolol,carvedilol,carvedilol/enalapril,celiprolol,cisplatin/epinephrine,dexamethasone/olanzapine,dipivefrin,dobutamine,dopamine,dorzolamide/t…
ALOX5AP	arachidonate 5-lipoxygenase activating protein	17444961	1.054	0.000222	Plasma Membrane	other
ANXA1	annexin A1	17363407	1.227	0.0162	Plasma Membrane	enzyme	diagnosis,prognosis,unspecified application	acyclovir/hydrocortisone,cytarabine/hydrocortisone/methotrexate,dasatinib/hydrocortisone,hydrocortisone,hydrocortisone/imatinib,hydrocortisone/mitoxantrone,hydrocortisone/prednisone
ANXA2	annexin A2	17518962	0.604	0.0316	Plasma Membrane	other	diagnosis,unspecified application
APLNR	apelin receptor	17372725	-0.963	0.0351	Plasma Membrane	G-protein coupled receptor
ATP1A2	ATPase Na+/K+ transporting subunit alpha 2	17229891	-1.12	0.00322	Plasma Membrane	transporter		digoxin,ethacrynic acid,perphenazine
ATP1A3	ATPase Na+/K+ transporting subunit alpha 3	17487805	0.818	0.00535	Plasma Membrane	transporter		digoxin,ethacrynic acid,perphenazine
ATP2B2	ATPase plasma membrane Ca2+ transporting 2	17469814	-0.618	0.00899	Plasma Membrane	transporter
ATP6V1A	ATPase H+ transporting V1 subunit A	17330523	0.726	0.0072	Plasma Membrane	transporter		bafilomycin A1,bafilomycin b1
ATP8B1	ATPase phospholipid transporting 8B1	17355026	0.571	0.0203	Plasma Membrane	transporter
ATP8B4	ATPase phospholipid transporting 8B4 (putative)	17391056	0.81	0.00708	Plasma Membrane	transporter
AXL	AXL receptor tyrosine kinase	17488032	0.807	0.00687	Plasma Membrane	kinase		ADCT-601,BA3011,bemcentinib,bosutinib,bosutinib/imatinib,bosutinib/ponatinib,bosutinib/rituximab,BPI-9016M,cabozantinib,cabozantinib/crizotinib,cabozantinib/erlotinib,cabozantinib/nivolumab,cabozantinib/tyrosine kinase inhibitor,DS-1205c,gilteritinib,humax-AXL-ADC,INCB081776,ningetinib,ONO-7475,RXDX-106,sitravatinib,SKI-G-801,TP-0903
BST1	bone marrow stromal cell antigen 1	17437198	1.526	0.000387	Plasma Membrane	enzyme		MEN1112
Bst2	bone marrow stromal cell antigen 2	17510345	0.881	0.0042	Plasma Membrane	other
C3AR1	complement C3a receptor 1	17470616	2.912	2.89e-06	Plasma Membrane	G-protein coupled receptor
C5AR1	complement C5a receptor 1	17486864	0.788	0.0132	Plasma Membrane	G-protein coupled receptor		IPH5401
CA4	carbonic anhydrase 4	17254508	-0.713	0.0477	Plasma Membrane	enzyme		acetazolamide,benzthiazide,chlorothiazide,chlorothiazide/reserpine,chlorthalidone,dichlorphenamide,ethoxyzolamide,hydrochlorothiazide,methazolamide,phentermine/topiramate,sulfacetamide,topiramate,trichloromethiazide
CADM2	cell adhesion molecule 2	17331447	-0.546	0.0313	Plasma Membrane	other
CADPS2	calcium dependent secretion activator 2	17465115	-0.601	0.0192	Plasma Membrane	other
CAVIN2	caveolae associated protein 2	17212719	-0.8	0.000815	Plasma Membrane	other
CCKAR	cholecystokinin A receptor	17448135	-0.619	0.0152	Plasma Membrane	G-protein coupled receptor		dexloxiglumide,lintitript,T-0632
CCR1	C-C motif chemokine receptor 1	17532569	2.023	0.0014	Plasma Membrane	G-protein coupled receptor		ECI301
CCR2	C-C motif chemokine receptor 2	17523650	1.376	0.000247	Plasma Membrane	G-protein coupled receptor		AZD2423,BMS-813160,MLN1202,PF-4136309,propagermanium
CCR5	C-C motif chemokine receptor 5 (gene/pseudogene)	17523659	2.572	0.000143	Plasma Membrane	G-protein coupled receptor	diagnosis,efficacy	ancriviroc,BMS-813160,ECI301,maraviroc,PRO 140,vicriviroc
CCR6	C-C motif chemokine receptor 6	17333066	0.538	0.0321	Plasma Membrane	G-protein coupled receptor	disease progression,prognosis
CD14	CD14 molecule	17353747	1.024	0.0167	Plasma Membrane	transmembrane receptor	efficacy,unspecified application
Cd33	CD33 antigen	17490149	0.965	0.00892	Plasma Membrane	other
CD44	CD44 molecule (Indian blood group)	17388733	0.624	0.0334	Plasma Membrane	other	diagnosis,disease progression,prognosis,unspecified application	A6 peptide,AMC303,anti-CD44v7 antibody,RO5429083
CD48	CD48 molecule	17219397	0.942	0.00164	Plasma Membrane	other
CD53	CD53 molecule	17408960	1.181	0.0222	Plasma Membrane	other
CD63	CD63 molecule	17238594	1.291	0.00113	Plasma Membrane	other
CD68	CD68 molecule	17264835	2.073	0.000121	Plasma Membrane	other	diagnosis,efficacy
CD72	CD72 molecule	17424608	1.589	8.55e-05	Plasma Membrane	transmembrane receptor
CD80	CD80 molecule	17325608	1.259	5.34e-05	Plasma Membrane	transmembrane receptor	efficacy,prognosis	abatacept,abatacept/methotrexate,belatacept,galiximab
CD84	CD84 molecule	17219418	1.358	0.000249	Plasma Membrane	other
CD109	CD109 molecule	17519738	1.015	0.00487	Plasma Membrane	other
CD180	CD180 molecule	17289527	1.291	0.00493	Plasma Membrane	other
CD200R1	CD200 receptor 1	17325861	1.444	0.000555	Plasma Membrane	transmembrane receptor
CD200R1L	CD200 receptor 1 like	17325874	1.143	0.0056	Plasma Membrane	other
CD300C	CD300c molecule	17271733	1.727	5.34e-05	Plasma Membrane	transmembrane receptor
CD300LB	CD300 molecule like family member b	17271710	0.685	0.0255	Plasma Membrane	other
CD300LD	CD300 molecule like family member d	17271724	1.217	0.0161	Plasma Membrane	other
CD300LF	CD300 molecule like family member f	17271776	1.132	3.12e-05	Plasma Membrane	other
CD300LG	CD300 molecule like family member g	17256870	-0.673	0.0445	Plasma Membrane	other
CD8A	CD8a molecule	17459482	0.89	0.0114	Plasma Membrane	other	diagnosis
CDH2	cadherin 2	17352884	-0.536	0.0473	Plasma Membrane	other	diagnosis,prognosis	N-ac-CHAVC-NH2
CDH13	cadherin 13	17506042	-0.657	0.0144	Plasma Membrane	other	diagnosis,disease progression,prognosis
CDHR1	cadherin related family member 1	17305143	1.506	0.000121	Plasma Membrane	other
CHL1	cell adhesion molecule L1 like	17461205	2.367	0.00252	Plasma Membrane	other
Clca3a1/Clca3a2	chloride channel accessory 3A1	17410845	1.276	0.0046	Plasma Membrane	ion channel
CLCN5	chloride voltage-gated channel 5	17539797	0.929	0.00132	Plasma Membrane	ion channel
CLCN7	chloride voltage-gated channel 7	17334545	0.632	0.0144	Plasma Membrane	ion channel
CLDN4	claudin 4	17453496	1.805	2.76e-05	Plasma Membrane	transmembrane receptor	diagnosis,efficacy,prognosis,unspecified application
CLEC10A	C-type lectin domain containing 10A	17251978	1.003	0.0212	Plasma Membrane	other
CLEC12A	C-type lectin domain family 12 member A	17463509	1.923	0.00111	Plasma Membrane	other
CLEC12B	C-type lectin domain family 12 member B	17471518	-1.432	0.00529	Plasma Membrane	other
CLEC1A	C-type lectin domain family 1 member A	17471528	-1.2	0.000354	Plasma Membrane	transmembrane receptor
CLEC4A	C-type lectin domain family 4 member A	17462764	0.904	0.00805	Plasma Membrane	transmembrane receptor
CLEC4D	C-type lectin domain family 4 member D	17462796	1.634	8.55e-05	Plasma Membrane	other
CLEC4E	C-type lectin domain family 4 member E	17470627	1.747	0.000345	Plasma Membrane	other
CLEC5A	C-type lectin domain containing 5A	17466228	2.201	7.4e-05	Plasma Membrane	other
CLEC6A	C-type lectin domain containing 6A	17462788	2.812	2.13e-05	Plasma Membrane	transmembrane receptor
CLEC7A	C-type lectin domain containing 7A	17471541	2.363	0.00117	Plasma Membrane	transmembrane receptor
CLSTN1	calsyntenin 1	17421828	-0.546	0.0283	Plasma Membrane	other	diagnosis
CNKSR2	connector enhancer of kinase suppressor of Ras 2	17545712	-0.761	0.0361	Plasma Membrane	other
CNTFR	ciliary neurotrophic factor receptor	17424279	-0.676	0.000244	Plasma Membrane	transmembrane receptor
CORO2B	coronin 2B	17527996	-0.551	0.0214	Plasma Membrane	other
CRLF2	cytokine receptor like factor 2	17450918	0.569	0.00612	Plasma Membrane	transmembrane receptor
CSF1R	colony stimulating factor 1 receptor	17351053	0.843	0.0409	Plasma Membrane	kinase	prognosis	3D185,AMG 820,ARRY-382,blinatumomab/imatinib,BLZ-945,bosutinib,bosutinib/imatinib,bosutinib/ponatinib,bosutinib/rituximab,c-FMS inhibitor,crizotinib/pazopanib,dasatinib/nilotinib,DCC-3014,decitabine/imatinib,edicotinib,emactuzumab,erdafitinib,FPA008,imatinib,imatinib/inotuzumab ozogamicin,imatinib/nilotinib,imatinib/rituximab,imatinib/sirolimus,imatinib/sorafenib,imatinib/sunitinib,IMC-CS4,lapati…
CSF2RB	colony stimulating factor 2 receptor subunit beta	17318950	1.313	0.00108	Plasma Membrane	transmembrane receptor		EPO/sargramostim,rituximab/sargramostim,sargramostim
Csprs (includes others)	component of Sp100-rs	17548924	1.588	0.00179	Plasma Membrane	G-protein coupled receptor
CTLA4	cytotoxic T-lymphocyte associated protein 4	17213478	0.584	0.0388	Plasma Membrane	transmembrane receptor	diagnosis,efficacy	ADU-1604,AGEN1884,AK104,anti CTLA-4 antibody,BMS-986218,dabrafenib/ipilimumab/trametinib,ipilimumab,ipilimumab/nivolumab,ipilimumab/vemurafenib,KN046,MEDI5752,MGD019,MK-1308,ONC-392,REGN4659,ticilimumab,XmAb20717,XmAb22841
CYSLTR1	cysteinyl leukotriene receptor 1	17544061	0.909	0.0121	Plasma Membrane	G-protein coupled receptor		masilukast,montelukast,pranlukast,zafirlukast
DAB2	DAB adaptor protein 2	17309935	0.926	0.0245	Plasma Membrane	other
DAGLB	diacylglycerol lipase beta	17444346	0.964	0.000238	Plasma Membrane	enzyme
DCLK1	doublecortin like kinase 1	17397708	0.678	0.00406	Plasma Membrane	kinase
DOCK4	dedicator of cytokinesis 4	17275168	-0.628	0.0365	Plasma Membrane	other
DOK1	docking protein 1	17468067	0.509	0.0407	Plasma Membrane	kinase
DPEP2	dipeptidase 2	17512611	1.037	0.000187	Plasma Membrane	peptidase
EDA2R	ectodysplasin A2 receptor	17543396	1.052	0.00162	Plasma Membrane	transmembrane receptor
EDNRB	endothelin receptor type B	17309268	-1.565	0.000116	Plasma Membrane	G-protein coupled receptor		atrasentan,bosentan,DEDN6526A,macitentan,sitaxsentan
EFNB2	ephrin B2	17507321	-0.86	0.0153	Plasma Membrane	kinase	diagnosis	sEphB4-HSA
EHD4	EH domain containing 4	17390066	-0.547	0.00621	Plasma Membrane	enzyme
ELAPOR1	endosome-lysosome associated apoptosis and autophagy regulator 1	17409343	-0.864	0.00326	Plasma Membrane	other
EPHA1	EPH receptor A1	17466397	-0.701	0.00429	Plasma Membrane	kinase
EVI2A	ecotropic viral integration site 2A	17266590	0.771	0.0111	Plasma Membrane	transmembrane receptor
F3	coagulation factor III, tissue factor	17402181	0.785	0.0387	Plasma Membrane	transmembrane receptor	efficacy,unspecified application	ALT-836,tisotumab vedotin
F7	coagulation factor VII	17499212	1.255	2.58e-05	Plasma Membrane	peptidase	unspecified application	nematode anticoagulant protein c2,PCI-27483
FCER1G	Fc fragment of IgE receptor Ig	17229658	1.564	0.00422	Plasma Membrane	transmembrane receptor
FCGR1A	Fc fragment of IgG receptor Ia	17408024	2.305	2.68e-05	Plasma Membrane	transmembrane receptor		IgG
FCGR2A	Fc fragment of IgG receptor IIa	17229620	1.657	1.95e-05	Plasma Membrane	transmembrane receptor		IgG
FCGR2B	Fc fragment of IgG receptor IIb	17229607	1.271	0.000273	Plasma Membrane	transmembrane receptor		BI-1206,IgG,XmAb5871
FCGR3A/FCGR3B	Fc fragment of IgG receptor IIIa	17219199	2.019	5.34e-05	Plasma Membrane	transmembrane receptor		AFM13,AFM24,IgG
Fcrls	Fc receptor-like S, scavenger receptor	17406514	1.061	0.0421	Plasma Membrane	other
FGFR2	fibroblast growth factor receptor 2	17496947	-0.817	0.00354	Plasma Membrane	kinase	diagnosis,response to therapy,unspecified application	3D185,alofanib,aprutumab ixadotin,ASP5878,BAY1179470,bortezomib/dexamethasone/thalidomide,bortezomib/thalidomide,debio 1347,derazantinib,dexamethasone/thalidomide,docetaxel/nintedanib,erdafitinib,everolimus/lenvatinib,FPA144,lenvatinib,lenvatinib/pembrolizumab,lucitanib,nintedanib,palifermin,pazopanib,pemigatinib,prednisone/thalidomide,PRN1371,regorafenib,regorafenib/sunitinib,rituximab/thalidomi…
FGFR3	fibroblast growth factor receptor 3	17436481	-0.668	0.0305	Plasma Membrane	kinase	prognosis	3D185,ASP5878,B-701,crizotinib/pazopanib,debio 1347,derazantinib,docetaxel/nintedanib,erdafitinib,everolimus/lenvatinib,lapatinib/pazopanib,lenvatinib,lenvatinib/pembrolizumab,LY3076226,masitinib,nintedanib,pazopanib,pemigatinib,PRN1371,SAR103168,selpercatinib
FGFR4	fibroblast growth factor receptor 4	17287590	-1	0.00556	Plasma Membrane	kinase	unspecified application	ASP5878,erdafitinib,everolimus/lenvatinib,fisogatinib,H3B-6527,INCB062079,lenvatinib,lenvatinib/pembrolizumab,LY2874455,PRN1371,roblitinib,U3-1784
FHL3	four and a half LIM domains 3	17418271	0.581	0.0432	Plasma Membrane	other
FLT3	fms related receptor tyrosine kinase 3	17455319	0.623	0.0308	Plasma Membrane	kinase	efficacy,prognosis,response to therapy,unspecified application	4G8-SDIEM,4SC-203,5-azacytidine/midostaurin,5-azacytidine/sorafenib,AGS62P1,AKN-028,amuvatinib,bevacizumab/sorafenib,bortezomib/sorafenib,bosutinib/hydroxyurea/ponatinib,bosutinib/ponatinib,brigatinib,cabozantinib,cabozantinib/crizotinib,cabozantinib/erlotinib,cabozantinib/nivolumab,cabozantinib/tyrosine kinase inhibitor,CDX-301,clofarabine/cytarabine/sorafenib,crenolanib,cytarabine/idarubicin/so…
FOLR2	folate receptor beta	17493949	1.04	0.0358	Plasma Membrane	transporter
FXYD1	FXYD domain containing ion transport regulator 1	17489420	-0.815	0.0181	Plasma Membrane	ion channel
FXYD5	FXYD domain containing ion transport regulator 5	17489399	0.657	0.0378	Plasma Membrane	ion channel
Gabre	gamma-aminobutyric acid (GABA) A receptor, subunit epsilon	17542194	-0.986	0.00266	Plasma Membrane	ion channel
GLP1R	glucagon like peptide 1 receptor	17335726	-1.583	0.007	Plasma Membrane	G-protein coupled receptor		albiglutide,avexitide,dulaglutide,dulaglutide/INS,exenatide,exenatide/INS,exenatide/INS/pioglitazone,GLP-1 (7-36) amide,INS/lixisenatide,insulin degludec/liraglutide,insulin glargine/lixisenatide,liraglutide,lixisenatide,MEDI0382,semaglutide,T-0632
GNAO1	G protein subunit alpha o1	17503884	-1.218	0.000121	Plasma Membrane	enzyme
GP9	glycoprotein IX platelet	17460569	0.953	0.0351	Plasma Membrane	other	unspecified application
GPC6	glypican 6	17302656	-0.597	0.0228	Plasma Membrane	transmembrane receptor
GPNMB	glycoprotein nmb	17458439	3.269	7.16e-08	Plasma Membrane	enzyme	unspecified application	glembatumumab,glembatumumab vedotin
GPR35	G protein-coupled receptor 35	17215873	0.734	0.00132	Plasma Membrane	G-protein coupled receptor
GPR65	G protein-coupled receptor 65	17277794	1.331	0.000555	Plasma Membrane	G-protein coupled receptor
GPR141	G protein-coupled receptor 141	17290894	0.707	0.0424	Plasma Membrane	G-protein coupled receptor
GPR160	G protein-coupled receptor 160	17396604	0.631	0.012	Plasma Membrane	G-protein coupled receptor
GPR171	G protein-coupled receptor 171	17405458	0.681	0.00911	Plasma Membrane	G-protein coupled receptor
GRIA1	glutamate ionotropic receptor AMPA type subunit 1	17249863	-1.05	0.0212	Plasma Membrane	ion channel		desflurane,enflurane,farampator,isoflurane,LY451395,methoxyflurane,perampanel,sevoflurane,talampanel,tezampanel
HAS2	hyaluronan synthase 2	17317167	1.056	0.0112	Plasma Membrane	enzyme
HHIP	hedgehog interacting protein	17510772	-1.57	0.00493	Plasma Membrane	other
HPSE2	heparanase 2 (inactive)	17364917	-0.591	0.0369	Plasma Membrane	enzyme
HPSE	heparanase	17450142	1.266	0.000771	Plasma Membrane	enzyme	efficacy	2-O,3-O-desulfated heparin,heparanase inhibitor PI-88,PG 545,roneparstat
HTR2A	5-hydroxytryptamine receptor 2A	17301926	0.612	0.00986	Plasma Membrane	G-protein coupled receptor		abaperidone,amitriptyline,amitriptyline/chlordiazepoxide,amitriptyline/ketamine,amitriptyline/melatonin,amitriptyline/perphenazine,apomorphine,aripiprazole,asenapine,azatadine,blonanserin,brexpiprazole,buspirone,caffeine/ergotamine,cariprazine,chloropromazine,chlorprothixene,cinitapride,cis-thiothixene,cis-urocanic acid,cisapride,clomipramine,clozapine,cyclobenzaprine,cyproheptadine,desipramine,d…
HTR2B	5-hydroxytryptamine receptor 2B	17225138	0.788	0.0178	Plasma Membrane	G-protein coupled receptor		apomorphine,asenapine,blonanserin,brexpiprazole,buspirone,cariprazine,chlorprothixene,clomipramine,dihydroergotamine,doxepin,eletriptan,epinastine,ergotamine,fenfluramine,fenfluramine/phentermine,methysergide,mirtazapine,nefazodone,opipramol,quetiapine,risperidone,triflupromazine
HVCN1	hydrogen voltage gated channel 1	17442046	0.883	0.00311	Plasma Membrane	ion channel
ICAM2	intercellular adhesion molecule 2	17270877	-0.698	0.00132	Plasma Membrane	other
ICOS	inducible T cell costimulator	17213490	0.729	0.0226	Plasma Membrane	transmembrane receptor		BMS-986226,GSK3359609,JTX-2011,KY1044,MEDI-570,XmAb23104
IFNGR2	interferon gamma receptor 2	17327084	0.594	0.0347	Plasma Membrane	transmembrane receptor		interferon gamma-1b
IGSF6	immunoglobulin superfamily member 6	17495839	1.52	0.00843	Plasma Membrane	transmembrane receptor
IL18RAP	interleukin 18 receptor accessory protein	17212252	0.684	0.0387	Plasma Membrane	transmembrane receptor
IL1R2	interleukin 1 receptor type 2	17212174	0.888	0.0243	Plasma Membrane	transmembrane receptor
IL1RL2	interleukin 1 receptor like 2	17212199	0.644	0.019	Plasma Membrane	transmembrane receptor
IL21R	interleukin 21 receptor	17482958	0.863	0.00447	Plasma Membrane	transmembrane receptor		denenicokin
IL2RA	interleukin 2 receptor subunit alpha	17366992	0.949	0.00024	Plasma Membrane	transmembrane receptor	efficacy,unspecified application	aldesleukin,basiliximab,basiliximab/cyclosporine,camidanlumab tesirine,daclizumab,denileukin diftitox,LMB-2,yttrium Y 90 basiliximab,yttrium Y 90 daclizumab
IL4R	interleukin 4 receptor	17482943	0.927	0.000158	Plasma Membrane	transmembrane receptor	response to therapy,unspecified application	dupilumab,MDNA55
IL7R	interleukin 7 receptor	17315891	1.349	0.00199	Plasma Membrane	transmembrane receptor		OSE-127,recombinant human interleukin-7
ITGA1	integrin subunit alpha 1	17296388	-0.615	0.0416	Plasma Membrane	other
ITGA5	integrin subunit alpha 5	17322369	0.714	0.0226	Plasma Membrane	transmembrane receptor	prognosis
ITGA7	integrin subunit alpha 7	17238605	0.862	0.00175	Plasma Membrane	other
ITGAE	integrin subunit alpha E	17252574	0.679	0.00294	Plasma Membrane	other	unspecified application
ITGAM	integrin subunit alpha M	17483577	2.109	7.3e-07	Plasma Membrane	transmembrane receptor	efficacy,unspecified application	abciximab,GB1275
ITGAX	integrin subunit alpha X	17483615	1.18	0.00908	Plasma Membrane	transmembrane receptor	unspecified application
ITGB2	integrin subunit beta 2	17234647	1.248	0.000131	Plasma Membrane	transmembrane receptor
JAML	junction adhesion molecule like	17516718	0.712	0.0024	Plasma Membrane	other
KCNA2	potassium voltage-gated channel subfamily A member 2	17401539	-0.707	0.00681	Plasma Membrane	ion channel		dalfampridine
KCNE4	potassium voltage-gated channel subfamily E regulatory subunit 4	17214711	0.615	0.00955	Plasma Membrane	ion channel
KCNJ3	potassium inwardly rectifying channel subfamily J member 3	17370883	-0.809	0.0481	Plasma Membrane	ion channel
KCNK2	potassium two pore domain channel subfamily K member 2	17230902	-0.626	0.0127	Plasma Membrane	ion channel
KCNN4	potassium calcium-activated channel subfamily N member 4	17474941	0.686	0.0189	Plasma Membrane	ion channel		betamethasone/clotrimazole,clotrimazole,senicapoc
KCNQ5	potassium voltage-gated channel subfamily Q member 5	17221686	-0.645	0.00579	Plasma Membrane	ion channel
KDR	kinase insert domain receptor	17448924	-1.128	0.000281	Plasma Membrane	kinase	disease progression,efficacy,prognosis,response to therapy,safety	5-azacytidine/midostaurin,5-azacytidine/sorafenib,AEE 788,alacizumab pegol,altiratinib,anlotinib,apatinib,avelumab/axitinib,axitinib,axitinib/pembrolizumab,bevacizumab/sorafenib,BMS-690514,bortezomib/sorafenib,brivanib,brivanib alaninate,cabozantinib,cabozantinib/crizotinib,cabozantinib/erlotinib,cabozantinib/nivolumab,cabozantinib/tyrosine kinase inhibitor,cediranib,CEP 7055,CHIR-265,clofarabine…
KIAA1549	KIAA1549	17465971	-0.666	0.00318	Plasma Membrane	other
LAIR1	leukocyte associated immunoglobulin like receptor 1	17485673	1.298	0.000112	Plasma Membrane	transmembrane receptor
LAPTM5	lysosomal protein transmembrane 5	17419287	0.661	0.0286	Plasma Membrane	other
LAT2	linker for activation of T cells family member 2	17453406	0.6	0.032	Plasma Membrane	other
LGR6	leucine rich repeat containing G protein-coupled receptor 6	17227198	-0.635	0.039	Plasma Membrane	G-protein coupled receptor
LIFR	LIF receptor subunit alpha	17310044	-0.573	0.0224	Plasma Membrane	transmembrane receptor	diagnosis
LILRB3	leukocyte immunoglobulin like receptor B3	17485589	1.159	0.000868	Plasma Membrane	transmembrane receptor
LILRB4	leukocyte immunoglobulin like receptor B4	17233210	1.841	0.000107	Plasma Membrane	other
LRP12	LDL receptor related protein 12	17316754	1.4	0.000136	Plasma Membrane	transmembrane receptor
LRRC26	leucine rich repeat containing 26	17367916	-0.711	0.0101	Plasma Membrane	ion channel
LY9	lymphocyte antigen 9	17229767	1.282	6.08e-05	Plasma Membrane	other
LY86	lymphocyte antigen 86	17286587	1.742	0.00181	Plasma Membrane	other
MAP2	microtubule associated protein 2	17213770	0.61	0.0137	Plasma Membrane	other		estramustine
MAPT	microtubule associated protein tau	17257197	-0.871	0.00264	Plasma Membrane	other	diagnosis,efficacy,unspecified application
MARCO	macrophage receptor with collagenous structure	17226327	1.972	8.55e-05	Plasma Membrane	transmembrane receptor
Milr1	mast cell immunoglobulin like receptor 1	17257599	0.993	0.00866	Plasma Membrane	other
MS4A8	membrane spanning 4-domains A8	17362874	1.072	0.0278	Plasma Membrane	other
MSR1	macrophage scavenger receptor 1	17508850	2.663	3.73e-08	Plasma Membrane	transmembrane receptor
MYD88	MYD88 innate immune signal transduction adaptor	17532137	0.83	0.00866	Plasma Membrane	other	efficacy	bazlitoran
MYZAP	myocardial zonula adherens protein	17528673	-1.004	0.00154	Plasma Membrane	other
NCKAP1L	NCK associated protein 1 like	17315570	1.179	0.000121	Plasma Membrane	other
NEGR1	neuronal growth regulator 1	17403829	-0.697	0.011	Plasma Membrane	other
NFAM1	NFAT activating protein with ITAM motif 1	17319738	0.631	0.0371	Plasma Membrane	transmembrane receptor
NOTCH4	notch receptor 4	17336559	-0.62	0.0287	Plasma Membrane	transcription regulator	diagnosis
NPR1	natriuretic peptide receptor 1	17407306	-0.687	0.0138	Plasma Membrane	enzyme		hydralazine/isosorbide dinitrate,isosorbide dinitrate,nesiritide,nitroprusside
NPR2	natriuretic peptide receptor 2	17413403	-0.706	0.0374	Plasma Membrane	G-protein coupled receptor		nesiritide
NRCAM	neuronal cell adhesion molecule	17275255	1.007	0.0455	Plasma Membrane	other
NRP2	neuropilin 2	17213548	0.648	0.0148	Plasma Membrane	kinase
NTRK3	neurotrophic receptor tyrosine kinase 3	17492244	-0.63	0.0291	Plasma Membrane	kinase	unspecified application	belizatinib,bevacizumab/entrectinib,DS-6051b,entrectinib,larotrectinib,lorlatinib,LOXO-195,NOV1601,ONO-7579,PLX7486,pralsetinib,repotrectinib
Olfr311 (includes others)	olfactory receptor 311	17250113	0.678	0.016	Plasma Membrane	G-protein coupled receptor
OLR1	oxidized low density lipoprotein receptor 1	17471550	1.609	0.00154	Plasma Membrane	transmembrane receptor	unspecified application
OR5V1	olfactory receptor family 5 subfamily V member 1	17337580	1.626	0.0152	Plasma Membrane	G-protein coupled receptor
P2RX6	purinergic receptor P2X 6	17323532	-0.593	0.00443	Plasma Membrane	ion channel
P2RY6	pyrimidinergic receptor P2Y6	17493869	1.248	0.00108	Plasma Membrane	G-protein coupled receptor
P2RY12	purinergic receptor P2Y12	17405482	0.852	0.00654	Plasma Membrane	G-protein coupled receptor		(2Z)-2-[1-[(S)-(2-chlorophenyl)-methoxycarbonyl-methyl]-4-sulfanyl-3-piperidylidene]acetic acid,ACT-246475,aspirin/cangrelor,aspirin/clopidogrel,aspirin/clopidogrel/rivaroxaban,aspirin/prasugrel,aspirin/rivaroxaban/ticlopidine,aspirin/ticagrelor,cangrelor,clopidogrel,clopidogrel/telmisartan,epoprostenol,prasugrel,ticagrelor,ticlopidine,treprostinil
P2RY13	purinergic receptor P2Y13	17405478	0.963	0.0189	Plasma Membrane	G-protein coupled receptor
PCDH1	protocadherin 1	17353923	-0.979	0.00168	Plasma Membrane	other
PCDH17	protocadherin 17	17302289	-0.755	0.0122	Plasma Membrane	other
Pcdhb9	protocadherin beta 9	17349894	0.555	0.0416	Plasma Membrane	other
PDZD2	PDZ domain containing 2	17316068	-1.276	0.000121	Plasma Membrane	other
PHLDA3	pleckstrin homology like domain family A member 3	17217619	0.724	0.0149	Plasma Membrane	other
Phxr4	per-hexamer repeat gene 4	17514687	-1.156	0.0195	Plasma Membrane	other
PILRA	paired immunoglobin like type 2 receptor alpha	17454166	0.913	0.0214	Plasma Membrane	other
PLIN2	perilipin 2	17426981	1.132	0.000256	Plasma Membrane	other	disease progression
PLLP	plasmolipin	17511878	-0.776	0.00831	Plasma Membrane	transporter
PLPP3	phospholipid phosphatase 3	17416234	-0.98	0.00866	Plasma Membrane	phosphatase
PLSCR4	phospholipid scramblase 4	17520353	-0.683	0.00568	Plasma Membrane	enzyme
PLXNC1	plexin C1	17244439	0.828	0.00074	Plasma Membrane	transmembrane receptor
PPP1R16B	protein phosphatase 1 regulatory subunit 16B	17378942	-0.886	0.0151	Plasma Membrane	phosphatase
PPP1R9A	protein phosphatase 1 regulatory subunit 9A	17455882	-0.556	0.0155	Plasma Membrane	other
PROCR	protein C receptor	17378440	0.687	0.0368	Plasma Membrane	other
PSCA	prostate stem cell antigen	17312186	0.958	0.0462	Plasma Membrane	other	unspecified application	AGS-1C4D4
PTAFR	platelet activating factor receptor	17419437	1.479	0.000265	Plasma Membrane	G-protein coupled receptor		lexipafant
PTGER4	prostaglandin E receptor 4	17315718	1.065	9.56e-05	Plasma Membrane	G-protein coupled receptor	unspecified application	BMS-986310,diclofenac/misoprostol,E7046,grapiprant,misoprostol,prostaglandin E1,prostaglandin E2,rivenprost
PTGFR	prostaglandin F receptor	17411163	-0.744	0.00267	Plasma Membrane	G-protein coupled receptor		(+)-fluprostenol,bimatoprost,bimatoprost/timolol,dinoprost,isopropyl unoprostone,latanoprost,latanoprost/netarsudil,latanoprost/timolol,tafluprost,timolol/travoprost,travoprost
PTPRK	protein tyrosine phosphatase receptor type K	17232358	-0.542	0.0173	Plasma Membrane	phosphatase
PTPRM	protein tyrosine phosphatase receptor type M	17346856	-0.735	0.013	Plasma Membrane	phosphatase
PTPRN	protein tyrosine phosphatase receptor type N	17224551	1.164	1.96e-05	Plasma Membrane	phosphatase
PTPRU	protein tyrosine phosphatase receptor type U	17430680	-0.651	0.00166	Plasma Membrane	phosphatase
RAMP2	receptor activity modifying protein 2	17256607	-0.616	0.0178	Plasma Membrane	G-protein coupled receptor		pramlintide
RAP2B	RAP2B, member of RAS oncogene family	17397962	0.919	0.00139	Plasma Membrane	enzyme
REEP6	receptor accessory protein 6	17235320	-1.012	0.0294	Plasma Membrane	other
RGS1	regulator of G protein signaling 1	17227780	1.18	0.0142	Plasma Membrane	enzyme
RGS5	regulator of G protein signaling 5	17219139	1.051	0.0392	Plasma Membrane	enzyme
RIPK3	receptor interacting serine/threonine kinase 3	17306906	0.534	0.0112	Plasma Membrane	kinase
RTKN2	rhotekin 2	17234024	-1.511	0.00334	Plasma Membrane	other
RTP4	receptor transporter protein 4	17324446	0.765	0.0291	Plasma Membrane	other
RYR2	ryanodine receptor 2	17290457	-0.776	0.0465	Plasma Membrane	ion channel
SCIMP	SLP adaptor and CSK interacting membrane protein	17265386	0.962	0.00273	Plasma Membrane	other
SCN1B	sodium voltage-gated channel beta subunit 1	17489464	0.999	0.000607	Plasma Membrane	ion channel		articaine,articaine/epinephrine,epinephrine/lidocaine,epinephrine/prilocaine,fosphenytoin,lidocaine,lidocaine/prilocaine,penicillin G/procaine,phenytoin,prilocaine,procaine,riluzole,zonisamide
SCN7A	sodium voltage-gated channel alpha subunit 7	17386090	-1.125	0.0017	Plasma Membrane	ion channel		riluzole
SDCBP	syndecan binding protein	17411605	0.843	0.0119	Plasma Membrane	enzyme
SELP	selectin P	17218845	0.981	0.00575	Plasma Membrane	transmembrane receptor	efficacy,safety,unspecified application	crizanlizumab
SELPLG	selectin P ligand	17451437	0.785	0.011	Plasma Membrane	other
SEMA4D	semaphorin 4D	17292569	0.562	0.0267	Plasma Membrane	transmembrane receptor		pepinemab
SEMA6A	semaphorin 6A	17354299	-1.212	0.0042	Plasma Membrane	transmembrane receptor
SEMA6B	semaphorin 6B	17346155	0.742	0.00772	Plasma Membrane	other	diagnosis
SHANK3	SH3 and multiple ankyrin repeat domains 3	17314190	-0.823	0.0154	Plasma Membrane	other
SIGLEC1	sialic acid binding Ig like lectin 1	17391834	1.791	0.000877	Plasma Membrane	other	diagnosis
SIRPA	signal regulatory protein alpha	17376167	0.995	0.000222	Plasma Membrane	phosphatase		BI 765063,CC-95251
SIRPB1	signal regulatory protein beta 1	17404217	1.318	0.02	Plasma Membrane	other
SLA	Src like adaptor	17317637	0.95	0.000391	Plasma Membrane	other
SLAMF7	SLAM family member 7	17229782	1.128	0.00775	Plasma Membrane	other		azintuxizumab vedotin,elotuzumab
SLC11A1	solute carrier family 11 member 1	17214197	1.514	5.34e-05	Plasma Membrane	transporter
SLC16A3	solute carrier family 16 member 3	17259534	0.507	0.0042	Plasma Membrane	transporter
SLC16A6	solute carrier family 16 member 6	17271244	0.708	0.00917	Plasma Membrane	transporter
SLC19A2	solute carrier family 19 member 2	17218889	0.577	0.0126	Plasma Membrane	transporter
SLC1A5	solute carrier family 1 member 5	17474143	-0.637	0.00816	Plasma Membrane	transporter
SLC29A3	solute carrier family 29 member 3	17241130	1.063	0.0026	Plasma Membrane	transporter
SLC2A1	solute carrier family 2 member 1	17417844	0.559	0.0407	Plasma Membrane	transporter	diagnosis,efficacy
SLC36A1	solute carrier family 36 member 1	17249811	0.555	0.0382	Plasma Membrane	transporter
SLC39A1	solute carrier family 39 member 1	17399672	0.743	0.0112	Plasma Membrane	transporter
SLC39A14	solute carrier family 39 member 14	17308299	0.653	0.0072	Plasma Membrane	transporter	unspecified application
SLC4A5	solute carrier family 4 member 5	17460023	-1.273	0.000247	Plasma Membrane	transporter
SLC7A5	solute carrier family 7 member 5	17513641	0.939	0.00156	Plasma Membrane	transporter	diagnosis
SLC7A8	solute carrier family 7 member 8	17306477	1.785	0.000249	Plasma Membrane	transporter
SLC7A10	solute carrier family 7 member 10	17476732	-1.345	0.00118	Plasma Membrane	transporter
SLC7A11	solute carrier family 7 member 11	17405082	1.773	0.000121	Plasma Membrane	transporter		(4S)-4-(3-(18F)fluoropropyl)-L-glutamate,N-acetyl-L-cysteine
SNED1	sushi, nidogen and EGF like domains 1	17215932	-0.857	0.00167	Plasma Membrane	other
SORBS1	sorbin and SH3 domain containing 1	17364484	-0.752	0.0352	Plasma Membrane	other
SPRR1A	small proline rich protein 1A	17407412	2.951	0.000501	Plasma Membrane	other
SPTBN1	spectrin beta, non-erythrocytic 1	17261339	-0.502	0.00951	Plasma Membrane	other
SYNGR1	synaptogyrin 1	17313064	0.657	0.0177	Plasma Membrane	transporter
TACSTD2	tumor associated calcium signal transducer 2	17467359	0.944	0.0158	Plasma Membrane	other		PF-06664178,sacituzumab govitecan,SKB264
TARM1	T cell-interacting, activating receptor on myeloid cells 1	17485510	1.266	0.000868	Plasma Membrane	other
TBC1D9	TBC1 domain family member 9	17502874	0.547	0.0485	Plasma Membrane	other
TBXAS1	thromboxane A synthase 1	17457472	0.985	0.000355	Plasma Membrane	enzyme		dazmegrel,ridogrel
TCIRG1	T cell immune regulator 1, ATPase H+ transporting V0 subunit a3	17361008	0.705	0.00198	Plasma Membrane	enzyme
TEK	TEK receptor tyrosine kinase	17415469	-0.73	0.00124	Plasma Membrane	kinase	efficacy	altiratinib,bosutinib/hydroxyurea/ponatinib,bosutinib/ponatinib,cabozantinib,cabozantinib/crizotinib,cabozantinib/erlotinib,cabozantinib/nivolumab,cabozantinib/tyrosine kinase inhibitor,CEP-11981,everolimus/vandetanib,glesatinib,pexmetinib,ponatinib,ponatinib/rituximab,rebastinib,regorafenib,regorafenib/sunitinib,SAR103168,TIE2 inhibitor,vandetanib
TES	testin LIM domain protein	17456131	0.601	0.0146	Plasma Membrane	other
TGFBR1	transforming growth factor beta receptor 1	17413915	0.795	0.00155	Plasma Membrane	kinase	disease progression,prognosis	galunisertib,SH3051,vactosertib,YL-13027
TGFBR3	transforming growth factor beta receptor 3	17450618	-0.807	0.0227	Plasma Membrane	kinase
TGM1	transglutaminase 1	17306816	1.119	0.000792	Plasma Membrane	enzyme
TIE1	tyrosine kinase with immunoglobulin like and EGF like domains 1	17429206	-0.789	0.00846	Plasma Membrane	kinase
TJP1	tight junction protein 1	17491853	-0.52	0.0214	Plasma Membrane	other
TLR1	toll like receptor 1	17448245	0.925	0.00899	Plasma Membrane	transmembrane receptor
TLR2	toll like receptor 2	17406279	1.151	0.00255	Plasma Membrane	transmembrane receptor	diagnosis,efficacy,unspecified application	OM 174 lipid,tomaralimab
TLR7	toll like receptor 7	17546109	1.126	0.0107	Plasma Membrane	transmembrane receptor		3M-001,5-fluorouracil/imiquimod,BDC-1001,BNT411,DSP-0509,hydroxychloroquine,imiquimod,NKTR-262,resiquimod,RO7119929,TQ-A3334,UC-1V150
TLR8	toll like receptor 8	17546101	1.32	0.000868	Plasma Membrane	transmembrane receptor		BDC-1001,imiquimod,NKTR-262,resiquimod,VTX-2337
TLR9	toll like receptor 9	17521171	0.603	0.0484	Plasma Membrane	transmembrane receptor	efficacy	agatolimod,AST-008,CpG ODN 10104,DUK-CPG-001,DV281,GNKG168,HYB-2055,hydroxychloroquine,ISS-1018,MGN1703,SD-101,tilsotolimod
TM6SF1	transmembrane 6 superfamily member 1	17479736	0.693	0.00885	Plasma Membrane	other
TMEM100	transmembrane protein 100	17255058	-1.075	0.00808	Plasma Membrane	other
TMEM204	transmembrane protein 204	17342133	-0.934	0.007	Plasma Membrane	other
TMEM14C	transmembrane protein 14C	17286732	0.687	0.0126	Plasma Membrane	other
TNFRSF9	TNF receptor superfamily member 9	17421981	0.746	0.0269	Plasma Membrane	transmembrane receptor		ADG106,anti-CD137 antibody,CTX-471,GEN1046,INBRX 105,NM21-1480,PF-05082566,PRS-343,RO7227166,urelumab
TNFRSF11A	TNF receptor superfamily member 11a	17216339	0.636	0.00347	Plasma Membrane	transmembrane receptor	efficacy
TNFRSF12A	TNF receptor superfamily member 12A	17341540	1.067	0.00314	Plasma Membrane	transmembrane receptor		enavatuzumab
TNFRSF1B	TNF receptor superfamily member 1B	17432674	1.03	0.000463	Plasma Membrane	transmembrane receptor	efficacy,safety
Tnfrsf22/Tnfrsf23	tumor necrosis factor receptor superfamily, member 22	17498323	1.545	0.000213	Plasma Membrane	transmembrane receptor
TNS1	tensin 1	17224211	-0.801	0.00127	Plasma Membrane	other
TNS2	tensin 2	17315272	-0.9	0.00485	Plasma Membrane	enzyme
TREM2	triggering receptor expressed on myeloid cells 2	17338416	2.356	2.37e-07	Plasma Membrane	transmembrane receptor		anti-TREM2 antibody
TRPV2	transient receptor potential cation channel subfamily V member 2	17250710	0.526	0.0202	Plasma Membrane	ion channel
TSPAN7	tetraspanin 7	17533269	-0.768	0.00248	Plasma Membrane	other
TSPAN13	tetraspanin 13	17280749	-0.835	0.000877	Plasma Membrane	other
TSTA3	tissue specific transplantation antigen P35B	17318232	0.55	0.022	Plasma Membrane	enzyme
TYROBP	transmembrane immune signaling adaptor TYROBP	17476364	1.678	6.4e-05	Plasma Membrane	transmembrane receptor
ULBP1	UL16 binding protein 1	17239040	0.94	0.0108	Plasma Membrane	transmembrane receptor
UPK2	uroplakin 2	17526297	-0.631	0.0235	Plasma Membrane	other	unspecified application
VAMP2	vesicle associated membrane protein 2	17251518	-0.735	0.0131	Plasma Membrane	other		botulinum toxin type B
VASP	vasodilator stimulated phosphoprotein	17487186	0.512	0.0145	Plasma Membrane	other	efficacy
VSIG2	V-set and immunoglobulin domain containing 2	17516087	-0.668	0.0299	Plasma Membrane	other
VSIR	V-set immunoregulatory receptor	17233646	0.562	0.00833	Plasma Membrane	other		CA-170,onvatilimab

## Sheet: plasma_m
Symbol	Entrez Gene Name	Affymetrix/Gene Symbol - mouse (Entrez Gene)	Expr Log Ratio	Expr p-value	Location	Type(s)	Biomarker Application(s)	Drug(s)
ABHD12	abhydrolase domain containing 12, lysophospholipase	17392730	0.714	0.0173	Plasma Membrane	enzyme
ADCY8	adenylate cyclase 8	17317533	-1.283	0.000256	Plasma Membrane	enzyme
ADCY9	adenylate cyclase 9	17327720	-0.547	0.0144	Plasma Membrane	enzyme
ANXA1	annexin A1	17363407	1.227	0.0162	Plasma Membrane	enzyme	diagnosis,prognosis,unspecified application	acyclovir/hydrocortisone,cytarabine/hydrocortisone/methotrexate,dasatinib/hydrocortisone,hydrocortisone,hydrocortisone/imatinib,hydrocortisone/mitoxantrone,hydrocortisone/prednisone
BST1	bone marrow stromal cell antigen 1	17437198	1.526	0.000387	Plasma Membrane	enzyme		MEN1112
CA4	carbonic anhydrase 4	17254508	-0.713	0.0477	Plasma Membrane	enzyme		acetazolamide,benzthiazide,chlorothiazide,chlorothiazide/reserpine,chlorthalidone,dichlorphenamide,ethoxyzolamide,hydrochlorothiazide,methazolamide,phentermine/topiramate,sulfacetamide,topiramate,trichloromethiazide
DAGLB	diacylglycerol lipase beta	17444346	0.964	0.000238	Plasma Membrane	enzyme
EHD4	EH domain containing 4	17390066	-0.547	0.00621	Plasma Membrane	enzyme
GNAO1	G protein subunit alpha o1	17503884	-1.218	0.000121	Plasma Membrane	enzyme
GPNMB	glycoprotein nmb	17458439	3.269	7.16e-08	Plasma Membrane	enzyme	unspecified application	glembatumumab,glembatumumab vedotin
HAS2	hyaluronan synthase 2	17317167	1.056	0.0112	Plasma Membrane	enzyme
HPSE2	heparanase 2 (inactive)	17364917	-0.591	0.0369	Plasma Membrane	enzyme
HPSE	heparanase	17450142	1.266	0.000771	Plasma Membrane	enzyme	efficacy	2-O,3-O-desulfated heparin,heparanase inhibitor PI-88,PG 545,roneparstat
NPR1	natriuretic peptide receptor 1	17407306	-0.687	0.0138	Plasma Membrane	enzyme		hydralazine/isosorbide dinitrate,isosorbide dinitrate,nesiritide,nitroprusside
PLSCR4	phospholipid scramblase 4	17520353	-0.683	0.00568	Plasma Membrane	enzyme
RAP2B	RAP2B, member of RAS oncogene family	17397962	0.919	0.00139	Plasma Membrane	enzyme
RGS1	regulator of G protein signaling 1	17227780	1.18	0.0142	Plasma Membrane	enzyme
RGS5	regulator of G protein signaling 5	17219139	1.051	0.0392	Plasma Membrane	enzyme
SDCBP	syndecan binding protein	17411605	0.843	0.0119	Plasma Membrane	enzyme
TBXAS1	thromboxane A synthase 1	17457472	0.985	0.000355	Plasma Membrane	enzyme		dazmegrel,ridogrel
TCIRG1	T cell immune regulator 1, ATPase H+ transporting V0 subunit a3	17361008	0.705	0.00198	Plasma Membrane	enzyme
TGM1	transglutaminase 1	17306816	1.119	0.000792	Plasma Membrane	enzyme
TNS2	tensin 2	17315272	-0.9	0.00485	Plasma Membrane	enzyme
TSTA3	tissue specific transplantation antigen P35B	17318232	0.55	0.022	Plasma Membrane	enzyme
ACKR1	atypical chemokine receptor 1 (Duffy blood group)	17229984	0.701	0.0282	Plasma Membrane	G-protein coupled receptor
ACKR3	atypical chemokine receptor 3	17215605	0.798	0.00569	Plasma Membrane	G-protein coupled receptor
ADGRE1	adhesion G protein-coupled receptor E1	17339013	1.744	9.56e-05	Plasma Membrane	G-protein coupled receptor
ADGRE5	adhesion G protein-coupled receptor E5	17510948	-0.75	0.00246	Plasma Membrane	G-protein coupled receptor
ADGRF5	adhesion G protein-coupled receptor F5	17337770	-0.603	0.0385	Plasma Membrane	G-protein coupled receptor
ADRA1A	adrenoceptor alpha 1A	17301502	-1.291	0.000211	Plasma Membrane	G-protein coupled receptor		acetaminophen/caffeine/chlorpheniramine/hydrocodone/phenylephrine,acetaminophen/clemastine/pseudoephedrine,acetaminophen/dexbrompheniramine/pseudoephedrine,acrivastine/pseudoephedrine,alfuzosin,alpha-methyl dopa,antazoline/naphazoline,apraclonidine,arbutamine,aripiprazole,articaine/epinephrine,asenapine,azatadine/pseudoephedrine,benzphetamine,brimonidine,brimonidine/brinzolamide,brompheniramine/c…
ADRB1	adrenoceptor beta 1	17360599	-0.797	0.000474	Plasma Membrane	G-protein coupled receptor	prognosis,unspecified application	acebutolol,albuterol,alprenolol,amiodarone,arbutamine,articaine/epinephrine,atenolol,atenolol/chlorthalidone,bendroflumethiazide/nadolol,betaxolol,bimatoprost/timolol,bisoprolol,bisoprolol/hydrochlorothiazide,bopindolol,bupivacaine/epinephrine,bupranolol,carteolol,carvedilol,carvedilol/enalapril,celiprolol,cisplatin/epinephrine,dexamethasone/olanzapine,dipivefrin,dobutamine,dopamine,dorzolamide/t…
APLNR	apelin receptor	17372725	-0.963	0.0351	Plasma Membrane	G-protein coupled receptor
C3AR1	complement C3a receptor 1	17470616	2.912	2.89e-06	Plasma Membrane	G-protein coupled receptor
C5AR1	complement C5a receptor 1	17486864	0.788	0.0132	Plasma Membrane	G-protein coupled receptor		IPH5401
CCKAR	cholecystokinin A receptor	17448135	-0.619	0.0152	Plasma Membrane	G-protein coupled receptor		dexloxiglumide,lintitript,T-0632
CCR1	C-C motif chemokine receptor 1	17532569	2.023	0.0014	Plasma Membrane	G-protein coupled receptor		ECI301
CCR2	C-C motif chemokine receptor 2	17523650	1.376	0.000247	Plasma Membrane	G-protein coupled receptor		AZD2423,BMS-813160,MLN1202,PF-4136309,propagermanium
CCR5	C-C motif chemokine receptor 5 (gene/pseudogene)	17523659	2.572	0.000143	Plasma Membrane	G-protein coupled receptor	diagnosis,efficacy	ancriviroc,BMS-813160,ECI301,maraviroc,PRO 140,vicriviroc
CCR6	C-C motif chemokine receptor 6	17333066	0.538	0.0321	Plasma Membrane	G-protein coupled receptor	disease progression,prognosis
Csprs (includes others)	component of Sp100-rs	17548924	1.588	0.00179	Plasma Membrane	G-protein coupled receptor
CYSLTR1	cysteinyl leukotriene receptor 1	17544061	0.909	0.0121	Plasma Membrane	G-protein coupled receptor		masilukast,montelukast,pranlukast,zafirlukast
EDNRB	endothelin receptor type B	17309268	-1.565	0.000116	Plasma Membrane	G-protein coupled receptor		atrasentan,bosentan,DEDN6526A,macitentan,sitaxsentan
GLP1R	glucagon like peptide 1 receptor	17335726	-1.583	0.007	Plasma Membrane	G-protein coupled receptor		albiglutide,avexitide,dulaglutide,dulaglutide/INS,exenatide,exenatide/INS,exenatide/INS/pioglitazone,GLP-1 (7-36) amide,INS/lixisenatide,insulin degludec/liraglutide,insulin glargine/lixisenatide,liraglutide,lixisenatide,MEDI0382,semaglutide,T-0632
GPR35	G protein-coupled receptor 35	17215873	0.734	0.00132	Plasma Membrane	G-protein coupled receptor
GPR65	G protein-coupled receptor 65	17277794	1.331	0.000555	Plasma Membrane	G-protein coupled receptor
GPR141	G protein-coupled receptor 141	17290894	0.707	0.0424	Plasma Membrane	G-protein coupled receptor
GPR160	G protein-coupled receptor 160	17396604	0.631	0.012	Plasma Membrane	G-protein coupled receptor
GPR171	G protein-coupled receptor 171	17405458	0.681	0.00911	Plasma Membrane	G-protein coupled receptor
HTR2A	5-hydroxytryptamine receptor 2A	17301926	0.612	0.00986	Plasma Membrane	G-protein coupled receptor		abaperidone,amitriptyline,amitriptyline/chlordiazepoxide,amitriptyline/ketamine,amitriptyline/melatonin,amitriptyline/perphenazine,apomorphine,aripiprazole,asenapine,azatadine,blonanserin,brexpiprazole,buspirone,caffeine/ergotamine,cariprazine,chloropromazine,chlorprothixene,cinitapride,cis-thiothixene,cis-urocanic acid,cisapride,clomipramine,clozapine,cyclobenzaprine,cyproheptadine,desipramine,d…
HTR2B	5-hydroxytryptamine receptor 2B	17225138	0.788	0.0178	Plasma Membrane	G-protein coupled receptor		apomorphine,asenapine,blonanserin,brexpiprazole,buspirone,cariprazine,chlorprothixene,clomipramine,dihydroergotamine,doxepin,eletriptan,epinastine,ergotamine,fenfluramine,fenfluramine/phentermine,methysergide,mirtazapine,nefazodone,opipramol,quetiapine,risperidone,triflupromazine
LGR6	leucine rich repeat containing G protein-coupled receptor 6	17227198	-0.635	0.039	Plasma Membrane	G-protein coupled receptor
NPR2	natriuretic peptide receptor 2	17413403	-0.706	0.0374	Plasma Membrane	G-protein coupled receptor		nesiritide
Olfr311 (includes others)	olfactory receptor 311	17250113	0.678	0.016	Plasma Membrane	G-protein coupled receptor
OR5V1	olfactory receptor family 5 subfamily V member 1	17337580	1.626	0.0152	Plasma Membrane	G-protein coupled receptor
P2RY6	pyrimidinergic receptor P2Y6	17493869	1.248	0.00108	Plasma Membrane	G-protein coupled receptor
P2RY12	purinergic receptor P2Y12	17405482	0.852	0.00654	Plasma Membrane	G-protein coupled receptor		(2Z)-2-[1-[(S)-(2-chlorophenyl)-methoxycarbonyl-methyl]-4-sulfanyl-3-piperidylidene]acetic acid,ACT-246475,aspirin/cangrelor,aspirin/clopidogrel,aspirin/clopidogrel/rivaroxaban,aspirin/prasugrel,aspirin/rivaroxaban/ticlopidine,aspirin/ticagrelor,cangrelor,clopidogrel,clopidogrel/telmisartan,epoprostenol,prasugrel,ticagrelor,ticlopidine,treprostinil
P2RY13	purinergic receptor P2Y13	17405478	0.963	0.0189	Plasma Membrane	G-protein coupled receptor
PTAFR	platelet activating factor receptor	17419437	1.479	0.000265	Plasma Membrane	G-protein coupled receptor		lexipafant
PTGER4	prostaglandin E receptor 4	17315718	1.065	9.56e-05	Plasma Membrane	G-protein coupled receptor	unspecified application	BMS-986310,diclofenac/misoprostol,E7046,grapiprant,misoprostol,prostaglandin E1,prostaglandin E2,rivenprost
PTGFR	prostaglandin F receptor	17411163	-0.744	0.00267	Plasma Membrane	G-protein coupled receptor		(+)-fluprostenol,bimatoprost,bimatoprost/timolol,dinoprost,isopropyl unoprostone,latanoprost,latanoprost/netarsudil,latanoprost/timolol,tafluprost,timolol/travoprost,travoprost
RAMP2	receptor activity modifying protein 2	17256607	-0.616	0.0178	Plasma Membrane	G-protein coupled receptor		pramlintide
Clca3a1/Clca3a2	chloride channel accessory 3A1	17410845	1.276	0.0046	Plasma Membrane	ion channel
CLCN5	chloride voltage-gated channel 5	17539797	0.929	0.00132	Plasma Membrane	ion channel
CLCN7	chloride voltage-gated channel 7	17334545	0.632	0.0144	Plasma Membrane	ion channel
FXYD1	FXYD domain containing ion transport regulator 1	17489420	-0.815	0.0181	Plasma Membrane	ion channel
FXYD5	FXYD domain containing ion transport regulator 5	17489399	0.657	0.0378	Plasma Membrane	ion channel
Gabre	gamma-aminobutyric acid (GABA) A receptor, subunit epsilon	17542194	-0.986	0.00266	Plasma Membrane	ion channel
GRIA1	glutamate ionotropic receptor AMPA type subunit 1	17249863	-1.05	0.0212	Plasma Membrane	ion channel		desflurane,enflurane,farampator,isoflurane,LY451395,methoxyflurane,perampanel,sevoflurane,talampanel,tezampanel
HVCN1	hydrogen voltage gated channel 1	17442046	0.883	0.00311	Plasma Membrane	ion channel
KCNA2	potassium voltage-gated channel subfamily A member 2	17401539	-0.707	0.00681	Plasma Membrane	ion channel		dalfampridine
KCNE4	potassium voltage-gated channel subfamily E regulatory subunit 4	17214711	0.615	0.00955	Plasma Membrane	ion channel
KCNJ3	potassium inwardly rectifying channel subfamily J member 3	17370883	-0.809	0.0481	Plasma Membrane	ion channel
KCNK2	potassium two pore domain channel subfamily K member 2	17230902	-0.626	0.0127	Plasma Membrane	ion channel
KCNN4	potassium calcium-activated channel subfamily N member 4	17474941	0.686	0.0189	Plasma Membrane	ion channel		betamethasone/clotrimazole,clotrimazole,senicapoc
KCNQ5	potassium voltage-gated channel subfamily Q member 5	17221686	-0.645	0.00579	Plasma Membrane	ion channel
LRRC26	leucine rich repeat containing 26	17367916	-0.711	0.0101	Plasma Membrane	ion channel
P2RX6	purinergic receptor P2X 6	17323532	-0.593	0.00443	Plasma Membrane	ion channel
RYR2	ryanodine receptor 2	17290457	-0.776	0.0465	Plasma Membrane	ion channel
SCN1B	sodium voltage-gated channel beta subunit 1	17489464	0.999	0.000607	Plasma Membrane	ion channel		articaine,articaine/epinephrine,epinephrine/lidocaine,epinephrine/prilocaine,fosphenytoin,lidocaine,lidocaine/prilocaine,penicillin G/procaine,phenytoin,prilocaine,procaine,riluzole,zonisamide
SCN7A	sodium voltage-gated channel alpha subunit 7	17386090	-1.125	0.0017	Plasma Membrane	ion channel		riluzole
TRPV2	transient receptor potential cation channel subfamily V member 2	17250710	0.526	0.0202	Plasma Membrane	ion channel
ACVRL1	activin A receptor like type 1	17315133	-0.673	0.0128	Plasma Membrane	kinase	diagnosis,unspecified application	panulisib,PF-3446962
AXL	AXL receptor tyrosine kinase	17488032	0.807	0.00687	Plasma Membrane	kinase		ADCT-601,BA3011,bemcentinib,bosutinib,bosutinib/imatinib,bosutinib/ponatinib,bosutinib/rituximab,BPI-9016M,cabozantinib,cabozantinib/crizotinib,cabozantinib/erlotinib,cabozantinib/nivolumab,cabozantinib/tyrosine kinase inhibitor,DS-1205c,gilteritinib,humax-AXL-ADC,INCB081776,ningetinib,ONO-7475,RXDX-106,sitravatinib,SKI-G-801,TP-0903
CSF1R	colony stimulating factor 1 receptor	17351053	0.843	0.0409	Plasma Membrane	kinase	prognosis	3D185,AMG 820,ARRY-382,blinatumomab/imatinib,BLZ-945,bosutinib,bosutinib/imatinib,bosutinib/ponatinib,bosutinib/rituximab,c-FMS inhibitor,crizotinib/pazopanib,dasatinib/nilotinib,DCC-3014,decitabine/imatinib,edicotinib,emactuzumab,erdafitinib,FPA008,imatinib,imatinib/inotuzumab ozogamicin,imatinib/nilotinib,imatinib/rituximab,imatinib/sirolimus,imatinib/sorafenib,imatinib/sunitinib,IMC-CS4,lapati…
DCLK1	doublecortin like kinase 1	17397708	0.678	0.00406	Plasma Membrane	kinase
DOK1	docking protein 1	17468067	0.509	0.0407	Plasma Membrane	kinase
EFNB2	ephrin B2	17507321	-0.86	0.0153	Plasma Membrane	kinase	diagnosis	sEphB4-HSA
EPHA1	EPH receptor A1	17466397	-0.701	0.00429	Plasma Membrane	kinase
FGFR2	fibroblast growth factor receptor 2	17496947	-0.817	0.00354	Plasma Membrane	kinase	diagnosis,response to therapy,unspecified application	3D185,alofanib,aprutumab ixadotin,ASP5878,BAY1179470,bortezomib/dexamethasone/thalidomide,bortezomib/thalidomide,debio 1347,derazantinib,dexamethasone/thalidomide,docetaxel/nintedanib,erdafitinib,everolimus/lenvatinib,FPA144,lenvatinib,lenvatinib/pembrolizumab,lucitanib,nintedanib,palifermin,pazopanib,pemigatinib,prednisone/thalidomide,PRN1371,regorafenib,regorafenib/sunitinib,rituximab/thalidomi…
FGFR3	fibroblast growth factor receptor 3	17436481	-0.668	0.0305	Plasma Membrane	kinase	prognosis	3D185,ASP5878,B-701,crizotinib/pazopanib,debio 1347,derazantinib,docetaxel/nintedanib,erdafitinib,everolimus/lenvatinib,lapatinib/pazopanib,lenvatinib,lenvatinib/pembrolizumab,LY3076226,masitinib,nintedanib,pazopanib,pemigatinib,PRN1371,SAR103168,selpercatinib
FGFR4	fibroblast growth factor receptor 4	17287590	-1	0.00556	Plasma Membrane	kinase	unspecified application	ASP5878,erdafitinib,everolimus/lenvatinib,fisogatinib,H3B-6527,INCB062079,lenvatinib,lenvatinib/pembrolizumab,LY2874455,PRN1371,roblitinib,U3-1784
FLT3	fms related receptor tyrosine kinase 3	17455319	0.623	0.0308	Plasma Membrane	kinase	efficacy,prognosis,response to therapy,unspecified application	4G8-SDIEM,4SC-203,5-azacytidine/midostaurin,5-azacytidine/sorafenib,AGS62P1,AKN-028,amuvatinib,bevacizumab/sorafenib,bortezomib/sorafenib,bosutinib/hydroxyurea/ponatinib,bosutinib/ponatinib,brigatinib,cabozantinib,cabozantinib/crizotinib,cabozantinib/erlotinib,cabozantinib/nivolumab,cabozantinib/tyrosine kinase inhibitor,CDX-301,clofarabine/cytarabine/sorafenib,crenolanib,cytarabine/idarubicin/so…
KDR	kinase insert domain receptor	17448924	-1.128	0.000281	Plasma Membrane	kinase	disease progression,efficacy,prognosis,response to therapy,safety	5-azacytidine/midostaurin,5-azacytidine/sorafenib,AEE 788,alacizumab pegol,altiratinib,anlotinib,apatinib,avelumab/axitinib,axitinib,axitinib/pembrolizumab,bevacizumab/sorafenib,BMS-690514,bortezomib/sorafenib,brivanib,brivanib alaninate,cabozantinib,cabozantinib/crizotinib,cabozantinib/erlotinib,cabozantinib/nivolumab,cabozantinib/tyrosine kinase inhibitor,cediranib,CEP 7055,CHIR-265,clofarabine…
NRP2	neuropilin 2	17213548	0.648	0.0148	Plasma Membrane	kinase
NTRK3	neurotrophic receptor tyrosine kinase 3	17492244	-0.63	0.0291	Plasma Membrane	kinase	unspecified application	belizatinib,bevacizumab/entrectinib,DS-6051b,entrectinib,larotrectinib,lorlatinib,LOXO-195,NOV1601,ONO-7579,PLX7486,pralsetinib,repotrectinib
RIPK3	receptor interacting serine/threonine kinase 3	17306906	0.534	0.0112	Plasma Membrane	kinase
TEK	TEK receptor tyrosine kinase	17415469	-0.73	0.00124	Plasma Membrane	kinase	efficacy	altiratinib,bosutinib/hydroxyurea/ponatinib,bosutinib/ponatinib,cabozantinib,cabozantinib/crizotinib,cabozantinib/erlotinib,cabozantinib/nivolumab,cabozantinib/tyrosine kinase inhibitor,CEP-11981,everolimus/vandetanib,glesatinib,pexmetinib,ponatinib,ponatinib/rituximab,rebastinib,regorafenib,regorafenib/sunitinib,SAR103168,TIE2 inhibitor,vandetanib
TGFBR1	transforming growth factor beta receptor 1	17413915	0.795	0.00155	Plasma Membrane	kinase	disease progression,prognosis	galunisertib,SH3051,vactosertib,YL-13027
TGFBR3	transforming growth factor beta receptor 3	17450618	-0.807	0.0227	Plasma Membrane	kinase
TIE1	tyrosine kinase with immunoglobulin like and EGF like domains 1	17429206	-0.789	0.00846	Plasma Membrane	kinase
ACTR3	actin related protein 3	17226420	0.715	0.00755	Plasma Membrane	other	diagnosis
ALOX5AP	arachidonate 5-lipoxygenase activating protein	17444961	1.054	0.000222	Plasma Membrane	other
ANXA2	annexin A2	17518962	0.604	0.0316	Plasma Membrane	other	diagnosis,unspecified application
Bst2	bone marrow stromal cell antigen 2	17510345	0.881	0.0042	Plasma Membrane	other
CADM2	cell adhesion molecule 2	17331447	-0.546	0.0313	Plasma Membrane	other
CADPS2	calcium dependent secretion activator 2	17465115	-0.601	0.0192	Plasma Membrane	other
CAVIN2	caveolae associated protein 2	17212719	-0.8	0.000815	Plasma Membrane	other
Cd33	CD33 antigen	17490149	0.965	0.00892	Plasma Membrane	other
CD44	CD44 molecule (Indian blood group)	17388733	0.624	0.0334	Plasma Membrane	other	diagnosis,disease progression,prognosis,unspecified application	A6 peptide,AMC303,anti-CD44v7 antibody,RO5429083
CD48	CD48 molecule	17219397	0.942	0.00164	Plasma Membrane	other
CD53	CD53 molecule	17408960	1.181	0.0222	Plasma Membrane	other
CD63	CD63 molecule	17238594	1.291	0.00113	Plasma Membrane	other
CD68	CD68 molecule	17264835	2.073	0.000121	Plasma Membrane	other	diagnosis,efficacy
CD84	CD84 molecule	17219418	1.358	0.000249	Plasma Membrane	other
CD109	CD109 molecule	17519738	1.015	0.00487	Plasma Membrane	other
CD180	CD180 molecule	17289527	1.291	0.00493	Plasma Membrane	other
CD200R1L	CD200 receptor 1 like	17325874	1.143	0.0056	Plasma Membrane	other
CD300LB	CD300 molecule like family member b	17271710	0.685	0.0255	Plasma Membrane	other
CD300LD	CD300 molecule like family member d	17271724	1.217	0.0161	Plasma Membrane	other
CD300LF	CD300 molecule like family member f	17271776	1.132	3.12e-05	Plasma Membrane	other
CD300LG	CD300 molecule like family member g	17256870	-0.673	0.0445	Plasma Membrane	other
CD8A	CD8a molecule	17459482	0.89	0.0114	Plasma Membrane	other	diagnosis
CDH2	cadherin 2	17352884	-0.536	0.0473	Plasma Membrane	other	diagnosis,prognosis	N-ac-CHAVC-NH2
CDH13	cadherin 13	17506042	-0.657	0.0144	Plasma Membrane	other	diagnosis,disease progression,prognosis
CDHR1	cadherin related family member 1	17305143	1.506	0.000121	Plasma Membrane	other
CHL1	cell adhesion molecule L1 like	17461205	2.367	0.00252	Plasma Membrane	other
CLEC10A	C-type lectin domain containing 10A	17251978	1.003	0.0212	Plasma Membrane	other
CLEC12A	C-type lectin domain family 12 member A	17463509	1.923	0.00111	Plasma Membrane	other
CLEC12B	C-type lectin domain family 12 member B	17471518	-1.432	0.00529	Plasma Membrane	other
CLEC4D	C-type lectin domain family 4 member D	17462796	1.634	8.55e-05	Plasma Membrane	other
CLEC4E	C-type lectin domain family 4 member E	17470627	1.747	0.000345	Plasma Membrane	other
CLEC5A	C-type lectin domain containing 5A	17466228	2.201	7.4e-05	Plasma Membrane	other
CLSTN1	calsyntenin 1	17421828	-0.546	0.0283	Plasma Membrane	other	diagnosis
CNKSR2	connector enhancer of kinase suppressor of Ras 2	17545712	-0.761	0.0361	Plasma Membrane	other
CORO2B	coronin 2B	17527996	-0.551	0.0214	Plasma Membrane	other
DAB2	DAB adaptor protein 2	17309935	0.926	0.0245	Plasma Membrane	other
DOCK4	dedicator of cytokinesis 4	17275168	-0.628	0.0365	Plasma Membrane	other
ELAPOR1	endosome-lysosome associated apoptosis and autophagy regulator 1	17409343	-0.864	0.00326	Plasma Membrane	other
Fcrls	Fc receptor-like S, scavenger receptor	17406514	1.061	0.0421	Plasma Membrane	other
FHL3	four and a half LIM domains 3	17418271	0.581	0.0432	Plasma Membrane	other
GP9	glycoprotein IX platelet	17460569	0.953	0.0351	Plasma Membrane	other	unspecified application
HHIP	hedgehog interacting protein	17510772	-1.57	0.00493	Plasma Membrane	other
ICAM2	intercellular adhesion molecule 2	17270877	-0.698	0.00132	Plasma Membrane	other
ITGA1	integrin subunit alpha 1	17296388	-0.615	0.0416	Plasma Membrane	other
ITGA7	integrin subunit alpha 7	17238605	0.862	0.00175	Plasma Membrane	other
ITGAE	integrin subunit alpha E	17252574	0.679	0.00294	Plasma Membrane	other	unspecified application
JAML	junction adhesion molecule like	17516718	0.712	0.0024	Plasma Membrane	other
KIAA1549	KIAA1549	17465971	-0.666	0.00318	Plasma Membrane	other
LAPTM5	lysosomal protein transmembrane 5	17419287	0.661	0.0286	Plasma Membrane	other
LAT2	linker for activation of T cells family member 2	17453406	0.6	0.032	Plasma Membrane	other
LILRB4	leukocyte immunoglobulin like receptor B4	17233210	1.841	0.000107	Plasma Membrane	other
LY9	lymphocyte antigen 9	17229767	1.282	6.08e-05	Plasma Membrane	other
LY86	lymphocyte antigen 86	17286587	1.742	0.00181	Plasma Membrane	other
MAP2	microtubule associated protein 2	17213770	0.61	0.0137	Plasma Membrane	other		estramustine
MAPT	microtubule associated protein tau	17257197	-0.871	0.00264	Plasma Membrane	other	diagnosis,efficacy,unspecified application
Milr1	mast cell immunoglobulin like receptor 1	17257599	0.993	0.00866	Plasma Membrane	other
MS4A8	membrane spanning 4-domains A8	17362874	1.072	0.0278	Plasma Membrane	other
MYD88	MYD88 innate immune signal transduction adaptor	17532137	0.83	0.00866	Plasma Membrane	other	efficacy	bazlitoran
MYZAP	myocardial zonula adherens protein	17528673	-1.004	0.00154	Plasma Membrane	other
NCKAP1L	NCK associated protein 1 like	17315570	1.179	0.000121	Plasma Membrane	other
NEGR1	neuronal growth regulator 1	17403829	-0.697	0.011	Plasma Membrane	other
NRCAM	neuronal cell adhesion molecule	17275255	1.007	0.0455	Plasma Membrane	other
PCDH1	protocadherin 1	17353923	-0.979	0.00168	Plasma Membrane	other
PCDH17	protocadherin 17	17302289	-0.755	0.0122	Plasma Membrane	other
Pcdhb9	protocadherin beta 9	17349894	0.555	0.0416	Plasma Membrane	other
PDZD2	PDZ domain containing 2	17316068	-1.276	0.000121	Plasma Membrane	other
PHLDA3	pleckstrin homology like domain family A member 3	17217619	0.724	0.0149	Plasma Membrane	other
Phxr4	per-hexamer repeat gene 4	17514687	-1.156	0.0195	Plasma Membrane	other
PILRA	paired immunoglobin like type 2 receptor alpha	17454166	0.913	0.0214	Plasma Membrane	other
PLIN2	perilipin 2	17426981	1.132	0.000256	Plasma Membrane	other	disease progression
PPP1R9A	protein phosphatase 1 regulatory subunit 9A	17455882	-0.556	0.0155	Plasma Membrane	other
PROCR	protein C receptor	17378440	0.687	0.0368	Plasma Membrane	other
PSCA	prostate stem cell antigen	17312186	0.958	0.0462	Plasma Membrane	other	unspecified application	AGS-1C4D4
REEP6	receptor accessory protein 6	17235320	-1.012	0.0294	Plasma Membrane	other
RTKN2	rhotekin 2	17234024	-1.511	0.00334	Plasma Membrane	other
RTP4	receptor transporter protein 4	17324446	0.765	0.0291	Plasma Membrane	other
SCIMP	SLP adaptor and CSK interacting membrane protein	17265386	0.962	0.00273	Plasma Membrane	other
SELPLG	selectin P ligand	17451437	0.785	0.011	Plasma Membrane	other
SEMA6B	semaphorin 6B	17346155	0.742	0.00772	Plasma Membrane	other	diagnosis
SHANK3	SH3 and multiple ankyrin repeat domains 3	17314190	-0.823	0.0154	Plasma Membrane	other
SIGLEC1	sialic acid binding Ig like lectin 1	17391834	1.791	0.000877	Plasma Membrane	other	diagnosis
SIRPB1	signal regulatory protein beta 1	17404217	1.318	0.02	Plasma Membrane	other
SLA	Src like adaptor	17317637	0.95	0.000391	Plasma Membrane	other
SLAMF7	SLAM family member 7	17229782	1.128	0.00775	Plasma Membrane	other		azintuxizumab vedotin,elotuzumab
SNED1	sushi, nidogen and EGF like domains 1	17215932	-0.857	0.00167	Plasma Membrane	other
SORBS1	sorbin and SH3 domain containing 1	17364484	-0.752	0.0352	Plasma Membrane	other
SPRR1A	small proline rich protein 1A	17407412	2.951	0.000501	Plasma Membrane	other
SPTBN1	spectrin beta, non-erythrocytic 1	17261339	-0.502	0.00951	Plasma Membrane	other
TACSTD2	tumor associated calcium signal transducer 2	17467359	0.944	0.0158	Plasma Membrane	other		PF-06664178,sacituzumab govitecan,SKB264
TARM1	T cell-interacting, activating receptor on myeloid cells 1	17485510	1.266	0.000868	Plasma Membrane	other
TBC1D9	TBC1 domain family member 9	17502874	0.547	0.0485	Plasma Membrane	other
TES	testin LIM domain protein	17456131	0.601	0.0146	Plasma Membrane	other
TJP1	tight junction protein 1	17491853	-0.52	0.0214	Plasma Membrane	other
TM6SF1	transmembrane 6 superfamily member 1	17479736	0.693	0.00885	Plasma Membrane	other
TMEM100	transmembrane protein 100	17255058	-1.075	0.00808	Plasma Membrane	other
TMEM204	transmembrane protein 204	17342133	-0.934	0.007	Plasma Membrane	other
TMEM14C	transmembrane protein 14C	17286732	0.687	0.0126	Plasma Membrane	other
TNS1	tensin 1	17224211	-0.801	0.00127	Plasma Membrane	other
TSPAN7	tetraspanin 7	17533269	-0.768	0.00248	Plasma Membrane	other
TSPAN13	tetraspanin 13	17280749	-0.835	0.000877	Plasma Membrane	other
UPK2	uroplakin 2	17526297	-0.631	0.0235	Plasma Membrane	other	unspecified application
VAMP2	vesicle associated membrane protein 2	17251518	-0.735	0.0131	Plasma Membrane	other		botulinum toxin type B
VASP	vasodilator stimulated phosphoprotein	17487186	0.512	0.0145	Plasma Membrane	other	efficacy
VSIG2	V-set and immunoglobulin domain containing 2	17516087	-0.668	0.0299	Plasma Membrane	other
VSIR	V-set immunoregulatory receptor	17233646	0.562	0.00833	Plasma Membrane	other		CA-170,onvatilimab
ACE2	angiotensin I converting enzyme 2	17539494	-0.61	0.0296	Plasma Membrane	peptidase		hydrochlorothiazide/moexipril,moexipril
ADAM8	ADAM metallopeptidase domain 8	17497525	0.967	0.000368	Plasma Membrane	peptidase	diagnosis
DPEP2	dipeptidase 2	17512611	1.037	0.000187	Plasma Membrane	peptidase
F7	coagulation factor VII	17499212	1.255	2.58e-05	Plasma Membrane	peptidase	unspecified application	nematode anticoagulant protein c2,PCI-27483
PLPP3	phospholipid phosphatase 3	17416234	-0.98	0.00866	Plasma Membrane	phosphatase
PPP1R16B	protein phosphatase 1 regulatory subunit 16B	17378942	-0.886	0.0151	Plasma Membrane	phosphatase
PTPRK	protein tyrosine phosphatase receptor type K	17232358	-0.542	0.0173	Plasma Membrane	phosphatase
PTPRM	protein tyrosine phosphatase receptor type M	17346856	-0.735	0.013	Plasma Membrane	phosphatase
PTPRN	protein tyrosine phosphatase receptor type N	17224551	1.164	1.96e-05	Plasma Membrane	phosphatase
PTPRU	protein tyrosine phosphatase receptor type U	17430680	-0.651	0.00166	Plasma Membrane	phosphatase
SIRPA	signal regulatory protein alpha	17376167	0.995	0.000222	Plasma Membrane	phosphatase		BI 765063,CC-95251
NOTCH4	notch receptor 4	17336559	-0.62	0.0287	Plasma Membrane	transcription regulator	diagnosis
CD14	CD14 molecule	17353747	1.024	0.0167	Plasma Membrane	transmembrane receptor	efficacy,unspecified application
CD72	CD72 molecule	17424608	1.589	8.55e-05	Plasma Membrane	transmembrane receptor
CD80	CD80 molecule	17325608	1.259	5.34e-05	Plasma Membrane	transmembrane receptor	efficacy,prognosis	abatacept,abatacept/methotrexate,belatacept,galiximab
CD200R1	CD200 receptor 1	17325861	1.444	0.000555	Plasma Membrane	transmembrane receptor
CD300C	CD300c molecule	17271733	1.727	5.34e-05	Plasma Membrane	transmembrane receptor
CLDN4	claudin 4	17453496	1.805	2.76e-05	Plasma Membrane	transmembrane receptor	diagnosis,efficacy,prognosis,unspecified application
CLEC1A	C-type lectin domain family 1 member A	17471528	-1.2	0.000354	Plasma Membrane	transmembrane receptor
CLEC4A	C-type lectin domain family 4 member A	17462764	0.904	0.00805	Plasma Membrane	transmembrane receptor
CLEC6A	C-type lectin domain containing 6A	17462788	2.812	2.13e-05	Plasma Membrane	transmembrane receptor
CLEC7A	C-type lectin domain containing 7A	17471541	2.363	0.00117	Plasma Membrane	transmembrane receptor
CNTFR	ciliary neurotrophic factor receptor	17424279	-0.676	0.000244	Plasma Membrane	transmembrane receptor
CRLF2	cytokine receptor like factor 2	17450918	0.569	0.00612	Plasma Membrane	transmembrane receptor
CSF2RB	colony stimulating factor 2 receptor subunit beta	17318950	1.313	0.00108	Plasma Membrane	transmembrane receptor		EPO/sargramostim,rituximab/sargramostim,sargramostim
CTLA4	cytotoxic T-lymphocyte associated protein 4	17213478	0.584	0.0388	Plasma Membrane	transmembrane receptor	diagnosis,efficacy	ADU-1604,AGEN1884,AK104,anti CTLA-4 antibody,BMS-986218,dabrafenib/ipilimumab/trametinib,ipilimumab,ipilimumab/nivolumab,ipilimumab/vemurafenib,KN046,MEDI5752,MGD019,MK-1308,ONC-392,REGN4659,ticilimumab,XmAb20717,XmAb22841
EDA2R	ectodysplasin A2 receptor	17543396	1.052	0.00162	Plasma Membrane	transmembrane receptor
EVI2A	ecotropic viral integration site 2A	17266590	0.771	0.0111	Plasma Membrane	transmembrane receptor
F3	coagulation factor III, tissue factor	17402181	0.785	0.0387	Plasma Membrane	transmembrane receptor	efficacy,unspecified application	ALT-836,tisotumab vedotin
FCER1G	Fc fragment of IgE receptor Ig	17229658	1.564	0.00422	Plasma Membrane	transmembrane receptor
FCGR1A	Fc fragment of IgG receptor Ia	17408024	2.305	2.68e-05	Plasma Membrane	transmembrane receptor		IgG
FCGR2A	Fc fragment of IgG receptor IIa	17229620	1.657	1.95e-05	Plasma Membrane	transmembrane receptor		IgG
FCGR2B	Fc fragment of IgG receptor IIb	17229607	1.271	0.000273	Plasma Membrane	transmembrane receptor		BI-1206,IgG,XmAb5871
FCGR3A/FCGR3B	Fc fragment of IgG receptor IIIa	17219199	2.019	5.34e-05	Plasma Membrane	transmembrane receptor		AFM13,AFM24,IgG
GPC6	glypican 6	17302656	-0.597	0.0228	Plasma Membrane	transmembrane receptor
ICOS	inducible T cell costimulator	17213490	0.729	0.0226	Plasma Membrane	transmembrane receptor		BMS-986226,GSK3359609,JTX-2011,KY1044,MEDI-570,XmAb23104
IFNGR2	interferon gamma receptor 2	17327084	0.594	0.0347	Plasma Membrane	transmembrane receptor		interferon gamma-1b
IGSF6	immunoglobulin superfamily member 6	17495839	1.52	0.00843	Plasma Membrane	transmembrane receptor
IL18RAP	interleukin 18 receptor accessory protein	17212252	0.684	0.0387	Plasma Membrane	transmembrane receptor
IL1R2	interleukin 1 receptor type 2	17212174	0.888	0.0243	Plasma Membrane	transmembrane receptor
IL1RL2	interleukin 1 receptor like 2	17212199	0.644	0.019	Plasma Membrane	transmembrane receptor
IL21R	interleukin 21 receptor	17482958	0.863	0.00447	Plasma Membrane	transmembrane receptor		denenicokin
IL2RA	interleukin 2 receptor subunit alpha	17366992	0.949	0.00024	Plasma Membrane	transmembrane receptor	efficacy,unspecified application	aldesleukin,basiliximab,basiliximab/cyclosporine,camidanlumab tesirine,daclizumab,denileukin diftitox,LMB-2,yttrium Y 90 basiliximab,yttrium Y 90 daclizumab
IL4R	interleukin 4 receptor	17482943	0.927	0.000158	Plasma Membrane	transmembrane receptor	response to therapy,unspecified application	dupilumab,MDNA55
IL7R	interleukin 7 receptor	17315891	1.349	0.00199	Plasma Membrane	transmembrane receptor		OSE-127,recombinant human interleukin-7
ITGA5	integrin subunit alpha 5	17322369	0.714	0.0226	Plasma Membrane	transmembrane receptor	prognosis
ITGAM	integrin subunit alpha M	17483577	2.109	7.3e-07	Plasma Membrane	transmembrane receptor	efficacy,unspecified application	abciximab,GB1275
ITGAX	integrin subunit alpha X	17483615	1.18	0.00908	Plasma Membrane	transmembrane receptor	unspecified application
ITGB2	integrin subunit beta 2	17234647	1.248	0.000131	Plasma Membrane	transmembrane receptor
LAIR1	leukocyte associated immunoglobulin like receptor 1	17485673	1.298	0.000112	Plasma Membrane	transmembrane receptor
LIFR	LIF receptor subunit alpha	17310044	-0.573	0.0224	Plasma Membrane	transmembrane receptor	diagnosis
LILRB3	leukocyte immunoglobulin like receptor B3	17485589	1.159	0.000868	Plasma Membrane	transmembrane receptor
LRP12	LDL receptor related protein 12	17316754	1.4	0.000136	Plasma Membrane	transmembrane receptor
MARCO	macrophage receptor with collagenous structure	17226327	1.972	8.55e-05	Plasma Membrane	transmembrane receptor
MSR1	macrophage scavenger receptor 1	17508850	2.663	3.73e-08	Plasma Membrane	transmembrane receptor
NFAM1	NFAT activating protein with ITAM motif 1	17319738	0.631	0.0371	Plasma Membrane	transmembrane receptor
OLR1	oxidized low density lipoprotein receptor 1	17471550	1.609	0.00154	Plasma Membrane	transmembrane receptor	unspecified application
PLXNC1	plexin C1	17244439	0.828	0.00074	Plasma Membrane	transmembrane receptor
SELP	selectin P	17218845	0.981	0.00575	Plasma Membrane	transmembrane receptor	efficacy,safety,unspecified application	crizanlizumab
SEMA4D	semaphorin 4D	17292569	0.562	0.0267	Plasma Membrane	transmembrane receptor		pepinemab
SEMA6A	semaphorin 6A	17354299	-1.212	0.0042	Plasma Membrane	transmembrane receptor
TLR1	toll like receptor 1	17448245	0.925	0.00899	Plasma Membrane	transmembrane receptor
TLR2	toll like receptor 2	17406279	1.151	0.00255	Plasma Membrane	transmembrane receptor	diagnosis,efficacy,unspecified application	OM 174 lipid,tomaralimab
TLR7	toll like receptor 7	17546109	1.126	0.0107	Plasma Membrane	transmembrane receptor		3M-001,5-fluorouracil/imiquimod,BDC-1001,BNT411,DSP-0509,hydroxychloroquine,imiquimod,NKTR-262,resiquimod,RO7119929,TQ-A3334,UC-1V150
TLR8	toll like receptor 8	17546101	1.32	0.000868	Plasma Membrane	transmembrane receptor		BDC-1001,imiquimod,NKTR-262,resiquimod,VTX-2337
TLR9	toll like receptor 9	17521171	0.603	0.0484	Plasma Membrane	transmembrane receptor	efficacy	agatolimod,AST-008,CpG ODN 10104,DUK-CPG-001,DV281,GNKG168,HYB-2055,hydroxychloroquine,ISS-1018,MGN1703,SD-101,tilsotolimod
TNFRSF9	TNF receptor superfamily member 9	17421981	0.746	0.0269	Plasma Membrane	transmembrane receptor		ADG106,anti-CD137 antibody,CTX-471,GEN1046,INBRX 105,NM21-1480,PF-05082566,PRS-343,RO7227166,urelumab
TNFRSF11A	TNF receptor superfamily member 11a	17216339	0.636	0.00347	Plasma Membrane	transmembrane receptor	efficacy
TNFRSF12A	TNF receptor superfamily member 12A	17341540	1.067	0.00314	Plasma Membrane	transmembrane receptor		enavatuzumab
TNFRSF1B	TNF receptor superfamily member 1B	17432674	1.03	0.000463	Plasma Membrane	transmembrane receptor	efficacy,safety
Tnfrsf22/Tnfrsf23	tumor necrosis factor receptor superfamily, member 22	17498323	1.545	0.000213	Plasma Membrane	transmembrane receptor
TREM2	triggering receptor expressed on myeloid cells 2	17338416	2.356	2.37e-07	Plasma Membrane	transmembrane receptor		anti-TREM2 antibody
TYROBP	transmembrane immune signaling adaptor TYROBP	17476364	1.678	6.4e-05	Plasma Membrane	transmembrane receptor
ULBP1	UL16 binding protein 1	17239040	0.94	0.0108	Plasma Membrane	transmembrane receptor
ABCA1	ATP binding cassette subfamily A member 1	17425301	0.575	0.0373	Plasma Membrane	transporter		probucol
Abcb1b	ATP-binding cassette, sub-family B (MDR/TAP), member 1B	17434555	1.536	7.26e-07	Plasma Membrane	transporter
ABCG1	ATP binding cassette subfamily G member 1	17335770	0.595	0.0373	Plasma Membrane	transporter	efficacy,unspecified application
ATP1A2	ATPase Na+/K+ transporting subunit alpha 2	17229891	-1.12	0.00322	Plasma Membrane	transporter		digoxin,ethacrynic acid,perphenazine
ATP1A3	ATPase Na+/K+ transporting subunit alpha 3	17487805	0.818	0.00535	Plasma Membrane	transporter		digoxin,ethacrynic acid,perphenazine
ATP2B2	ATPase plasma membrane Ca2+ transporting 2	17469814	-0.618	0.00899	Plasma Membrane	transporter
ATP6V1A	ATPase H+ transporting V1 subunit A	17330523	0.726	0.0072	Plasma Membrane	transporter		bafilomycin A1,bafilomycin b1
ATP8B1	ATPase phospholipid transporting 8B1	17355026	0.571	0.0203	Plasma Membrane	transporter
ATP8B4	ATPase phospholipid transporting 8B4 (putative)	17391056	0.81	0.00708	Plasma Membrane	transporter
FOLR2	folate receptor beta	17493949	1.04	0.0358	Plasma Membrane	transporter
PLLP	plasmolipin	17511878	-0.776	0.00831	Plasma Membrane	transporter
SLC11A1	solute carrier family 11 member 1	17214197	1.514	5.34e-05	Plasma Membrane	transporter
SLC16A3	solute carrier family 16 member 3	17259534	0.507	0.0042	Plasma Membrane	transporter
SLC16A6	solute carrier family 16 member 6	17271244	0.708	0.00917	Plasma Membrane	transporter
SLC19A2	solute carrier family 19 member 2	17218889	0.577	0.0126	Plasma Membrane	transporter
SLC1A5	solute carrier family 1 member 5	17474143	-0.637	0.00816	Plasma Membrane	transporter
SLC29A3	solute carrier family 29 member 3	17241130	1.063	0.0026	Plasma Membrane	transporter
SLC2A1	solute carrier family 2 member 1	17417844	0.559	0.0407	Plasma Membrane	transporter	diagnosis,efficacy
SLC36A1	solute carrier family 36 member 1	17249811	0.555	0.0382	Plasma Membrane	transporter
SLC39A1	solute carrier family 39 member 1	17399672	0.743	0.0112	Plasma Membrane	transporter
SLC39A14	solute carrier family 39 member 14	17308299	0.653	0.0072	Plasma Membrane	transporter	unspecified application
SLC4A5	solute carrier family 4 member 5	17460023	-1.273	0.000247	Plasma Membrane	transporter
SLC7A5	solute carrier family 7 member 5	17513641	0.939	0.00156	Plasma Membrane	transporter	diagnosis
SLC7A8	solute carrier family 7 member 8	17306477	1.785	0.000249	Plasma Membrane	transporter
SLC7A10	solute carrier family 7 member 10	17476732	-1.345	0.00118	Plasma Membrane	transporter
SLC7A11	solute carrier family 7 member 11	17405082	1.773	0.000121	Plasma Membrane	transporter		(4S)-4-(3-(18F)fluoropropyl)-L-glutamate,N-acetyl-L-cysteine
SYNGR1	synaptogyrin 1	17313064	0.657	0.0177	Plasma Membrane	transporter

## Sheet: other
Symbol	Entrez Gene Name	Affymetrix/Gene Symbol - mouse (Entrez Gene)	Expr Log Ratio	Expr p-value	Location	Type(s)	Biomarker Application(s)	Drug(s)
Akr1c12/Akr1c13	aldo-keto reductase family 1, member C13	17284936	0.809	0.0434	Other	enzyme
PPIL6	peptidylprolyl isomerase like 6	17232881	-1.109	0.0196	Other	enzyme
SLFN12L	schlafen family member 12 like	17254176	1.421	0.000365	Other	enzyme
UBASH3B	ubiquitin associated and SH3 domain containing B	17525868	0.654	0.00853	Other	enzyme
PIEZO2	piezo type mechanosensitive ion channel component 2	17354906	-0.82	0.00393	Other	ion channel
mir-297	microRNA 297	17366734	-1.265	0.0305	Other	microRNA
0610043K17Rik	RIKEN cDNA 0610043K17 gene	17415922	-0.687	0.00674	Other	other
1500002C15Rik	RIKEN cDNA 1500002C15 gene	17433858	-0.631	0.0142	Other	other
1700086D15Rik	--	17264153	-0.646	0.0442	Other	other
2310067E19Rik	RIKEN cDNA 2310067E19 gene	17426784	-0.626	0.0462	Other	other
2610005L07Rik	cadherin 11 pseudogene	17499676	-0.917	0.0369	Other	other
2610027K06Rik	RIKEN cDNA 2610027K06 gene	17267190	-0.643	0.00838	Other	other
2610524H06Rik	RIKEN cDNA 2610524H06 gene	17451614	1.191	0.00305	Other	other
4930522O17Rik	RIKEN cDNA 4930522O17 gene	17414184	-0.603	0.04	Other	other
4930578N18Rik	RIKEN cDNA 4930578N18 gene	17326654	0.512	0.0352	Other	other
5031426D15Rik	RIKEN cDNA 5031426D15 gene	17381509	-0.888	0.00455	Other	other
5930403L14Rik	RIKEN cDNA 5930403L14 gene	17433656	-0.526	0.0122	Other	other
8430431K14Rik	RIKEN cDNA 8430431K14 gene	17363925	-1.061	0.0144	Other	other
9030622O22Rik	RIKEN cDNA 9030622O22 gene	17392549	-0.757	0.00169	Other	other
9130230L23Rik	RIKEN cDNA 9130230L23 gene	17448376	-0.634	0.0142	Other	other
9430065F17Rik	RIKEN cDNA 9430065F17 gene	17288324	-0.685	0.0422	Other	other
9530026P05Rik	RIKEN cDNA 9530026P05 gene	17461060	-1.212	0.0143	Other	other
9530091C08Rik	RIKEN cDNA 9530091C08 gene	17518933	-0.607	0.0448	Other	other
A330023F24Rik	RIKEN cDNA A330023F24 gene	17221026	-0.803	0.0418	Other	other
A530020G20Rik	RIKEN cDNA A530020G20 gene	17402165	-0.607	0.0379	Other	other
A930012L18Rik	RIKEN cDNA A930012L18 gene	17350295	-1.11	0.0124	Other	other
AFAP1L1	actin filament associated protein 1 like 1	17354810	-0.817	0.00843	Other	other	unspecified application
ALKAL1	ALK and LTK ligand 1	17210947	1.209	0.00681	Other	other
Arhgef38	Rho guanine nucleotide exchange factor (GEF) 38	17410472	-0.895	0.00447	Other	other
ARL11	ADP ribosylation factor like GTPase 11	17301108	1.029	0.0017	Other	other
ARMCX4	armadillo repeat containing X-linked 4	17537730	0.569	0.0419	Other	other
B130024G19Rik	RIKEN cDNA B130024G19 gene	17479148	-0.634	0.0429	Other	other
B430010I23Rik	RIKEN cDNA B430010I23 gene	17500744	-1.359	0.00024	Other	other
B430306N03Rik	RIKEN cDNA B430306N03 gene	17338403	0.816	0.0126	Other	other
BAHCC1	BAH domain and coiled-coil containing 1	17259276	-0.523	0.0296	Other	other
BC039771	cDNA sequence BC039771	17377170	-0.604	0.0162	Other	other
BC147527	cDNA sequence BC147527	17290205	0.763	0.0372	Other	other
BEX1	brain expressed X-linked 1	17544691	-1.094	0.0195	Other	other
C87198	expressed sequence C87198	17275596	-1.116	0.00248	Other	other
C030017K20Rik	RIKEN cDNA C030017K20 gene	17422546	-0.891	0.00922	Other	other
C12orf56	chromosome 12 open reading frame 56	17237732	-0.524	0.0275	Other	other
C130026I21Rik (includes others)	RIKEN cDNA C130026I21 gene	17366201	1.141	0.000659	Other	other
C430002N11Rik	RIKEN cDNA C430002N11 gene	17520582	0.954	0.0247	Other	other
CACUL1	CDK2 associated cullin domain 1	17548127	0.615	0.0234	Other	other
CCDC34	coiled-coil domain containing 34	17374121	0.581	0.00916	Other	other
CCDC122	coiled-coil domain containing 122	17302102	0.991	0.0368	Other	other
CCDC85A	coiled-coil domain containing 85A	17261233	-0.793	0.00607	Other	other
CCL27	C-C motif chemokine ligand 27	17434221	-1.073	5.34e-05	Other	other
CCM2L	CCM2 like scaffold protein	17377857	-0.826	0.0101	Other	other
CERCAM	cerebral endothelial cell adhesion molecule	17368930	0.597	0.0343	Other	other
Clec4a3	C-type lectin domain family 4, member a3	17462738	0.944	0.0315	Other	other
CLIP4	CAP-Gly domain containing linker protein family member 4	17339529	0.589	0.0404	Other	other
Cstdc2	cystatin domain containing 2	17392600	-0.839	0.0202	Other	other
CYYR1	cysteine and tyrosine rich 1	17331692	-0.693	0.00662	Other	other
D730003I15Rik	RIKEN cDNA D730003I15 gene	17220794	-0.675	0.0267	Other	other
E030013I19Rik	RIKEN cDNA E030013I19 gene	17367031	-0.508	0.0135	Other	other
E330011O21Rik	RIKEN cDNA E330011O21 gene	17331585	0.648	0.0446	Other	other
E330033B04Rik	RIKEN cDNA E330033B04 gene	17320885	-0.884	0.0263	Other	other
EFCC1	EF-hand and coiled-coil domain containing 1	17460558	-0.625	0.0147	Other	other
EFHD2	EF-hand domain family member D2	17432341	0.563	0.00478	Other	other
EPSTI1	epithelial stromal interaction 1	17302141	1.151	0.000868	Other	other
FAM110D	family with sequence similarity 110 member D	17431266	0.615	0.00853	Other	other
Fendrr	Foxf1 adjacent non-coding developmental regulatory RNA	17513550	-1.501	0.0041	Other	other
GAS5	growth arrest specific 5	17218653	0.76	0.0234	Other	other
GAS2L3	growth arrest specific 2 like 3	17244057	1.244	0.000209	Other	other
GASK1A	golgi associated kinase 1A	17523387	-0.557	0.0294	Other	other
Gm830	predicted gene 830	17427322	-0.559	0.0183	Other	other
Gm5086	predicted gene 5086	17289388	0.784	0.0287	Other	other
Gm5176	high mobility group box 2 pseudogene	17237275	-0.806	0.0331	Other	other
Gm5431	predicted gene 5431	17262209	1.118	0.0193	Other	other
Gm5859	family with sequence similarity 205 pseudogene	17412952	-1.008	0.0455	Other	other
Gm6929	predicted gene 6929	17486515	0.647	0.0461	Other	other
Gm7592	predicted gene 7592	17548926	1.604	0.00176	Other	other
Gm8995	predicted gene 8995	17494674	0.868	0.0208	Other	other
Gm9917	--	17530915	-1.016	0.00534	Other	other
Gm10400	predicted gene 10400	17464061	-1.428	0.00371	Other	other
Gm10415	predicted gene 10415	17471146	1.324	0.00162	Other	other
Gm10855	predicted gene 10855	17381511	-0.862	0.00799	Other	other
Gm11944	predicted gene 11944	17246569	-0.749	0.0369	Other	other
Gm12474	predicted gene 12474	17400994	-1.289	0.00462	Other	other
Gm13387	predicted gene 13387	17382378	-1.374	0.000868	Other	other
Gm13816	predicted gene 13816	17373527	-0.818	0.00347	Other	other
Gm15998	--	17399404	-0.667	0.0481	Other	other
Gm19765	predicted gene, 19765	17480924	0.854	0.0121	Other	other
Gm20257	caspase 8 pseudogene	17213189	-1.091	0.0456	Other	other
Gm20300	predicted gene, 20300	17240043	-0.751	0.0381	Other	other
Gm20554	predicted gene, 20554	17294228	-0.918	0.00848	Other	other
Gm20753	predicted gene, 20753	17226039	-0.501	0.0437	Other	other
Gm21057	predicted gene, 21057	17492474	-0.713	0.045	Other	other
Gm22067	Predicted gene, 22067	17313320	-0.779	0.0438	Other	other
Gm22149	predicted gene, 22149	17282397	-0.825	0.0137	Other	other
Gm22270	Predicted gene, 22270	17440132	2.124	0.0467	Other	other
Gm22303	Predicted gene, 22303	17274247	1.18	0.0119	Other	other
Gm22334	predicted gene, 22334	17393334	-1.019	0.00447	Other	other
Gm22358	Predicted gene, 22358	17291353	0.988	0.0296	Other	other
Gm23041	Predicted gene, 23041	17244862	1.427	0.0302	Other	other
Gm23169	Predicted gene, 23169	17221345	-1.364	0.0196	Other	other
Gm23199	Predicted gene, 23199	17538186	-1.295	0.0346	Other	other
Gm23258	Predicted gene, 23258	17534980	-1.5	0.045	Other	other
Gm23458	Predicted gene, 23458	17442282	-1.011	0.0243	Other	other
Gm23482	predicted gene, 23482	17287245	-1.015	0.0149	Other	other
Gm23527	predicted gene, 23527	17470029	-0.962	0.0375	Other	other
Gm23692	Predicted gene, 23692	17327426	-0.686	0.0393	Other	other
Gm23859	Predicted gene, 23859	17352343	-1.042	0.0314	Other	other
Gm24655	Predicted gene, 24655	17239742	0.668	0.04	Other	other
Gm25135	Predicted gene, 25135	17337794	-1.295	0.0383	Other	other
Gm25604	predicted gene, 25604	17430153	-0.557	0.0215	Other	other
Gm25831	Predicted gene, 25831	17309061	-0.911	0.0155	Other	other
Gm25835	Predicted gene, 25835	17264863	1.485	0.0327	Other	other
Gm25915	predicted gene, 25915	17545073	0.639	0.0399	Other	other
Gm26387	Predicted gene, 26387	17440134	0.788	0.0302	Other	other
Gm26437	Predicted gene, 26437	17541227	1.023	0.0362	Other	other
Gm26495	Predicted gene, 26495	17237490	-1.16	0.0132	Other	other
Gm26671	predicted gene, 26671	17405375	-0.508	0.0399	Other	other
Gm26910	predicted gene, 26910	17355248	-0.713	0.0209	Other	other
Gm29609	predicted gene 29609	17446851	-0.675	0.0318	Other	other
Gm32819	predicted gene, 32819	17517215	-0.782	0.0224	Other	other
Gm20878 (includes others)	predicted gene, 21953	17412979	-0.695	0.00311	Other	other
Gm21188/Gm36079	predicted gene, 21188	17296558	1.438	5.34e-05	Other	other
Gm5148/Rps23rg1	ribosomal protein S23, retrogene 1	17404923	-0.85	0.0317	Other	other
GRTP1	growth hormone regulated TBC protein 1	17507559	-0.775	0.00481	Other	other
H2-T22	histocompatibility 2, T region locus 22	17344593	0.689	0.00888	Other	other
Hmga2-ps1	high mobility group AT-hook 2, pseudogene 1	17230225	0.689	0.0341	Other	other
Ighv1-55	immunoglobulin heavy variable 1-55	17284585	0.704	0.0473	Other	other
Ighv1-84	immunoglobulin heavy variable 1-84	17284664	-1.312	0.0378	Other	other
Ighv2-9	immunoglobulin heavy variable 2-9	17284426	1.727	0.00298	Other	other
Igkv12-89	immunoglobulin kappa chain variable 12-89	17467404	2.566	0.0488	Other	other
Igkv3-12	immunoglobulin kappa variable 3-12	17459389	-1.955	0.0354	Other	other
ITPRID1	ITPR interacting domain containing 1	17458866	-1.342	0.00124	Other	other
Kantr	Kdm5c adjacent non-coding transcript	17545430	-0.58	0.0421	Other	other
KCTD21	potassium channel tetramerization domain containing 21	17480324	-0.564	0.044	Other	other
KIAA0895	KIAA0895	17515436	0.852	0.000261	Other	other
KIAA0930	KIAA0930	17320019	0.641	0.00334	Other	other
KLHL6	kelch like family member 6	17329063	0.523	0.018	Other	other
LOC115485611	small nucleolar RNA SNORA3/SNORA45 family	17481682	2.387	0.0158	Other	other
LOC115488691	small nucleolar RNA SNORA4	17324402	1.877	0.0187	Other	other
LOC115488693	small nucleolar RNA SNORA32	17326982	1.265	0.0254	Other	other
LOC115489602	small nucleolar RNA SNORA8	17369950	-1.515	0.000295	Other	other
LRRC25	leucine rich repeat containing 25	17501989	0.965	0.000116	Other	other
Lrrc74b	leucine rich repeat containing 74B	17328728	-0.717	0.0296	Other	other
MAGIX	MAGI family member, X-linked	17539888	-0.536	0.0147	Other	other
MS4A7	membrane spanning 4-domains A7	17362953	2.457	5.88e-06	Other	other
Ms4a14	membrane-spanning 4-domains, subfamily A, member 14	17362941	2.186	5.34e-05	Other	other
MS4A6A	membrane spanning 4-domains A6A	17362973	2.221	0.00227	Other	other
Ms4a6b	membrane-spanning 4-domains, subfamily A, member 6B	17357688	1.143	0.0042	Other	other
MYBPHL	myosin binding protein H like	17401699	-0.693	0.0181	Other	other
MYOZ2	myozenin 2	17410022	-1.692	0.000371	Other	other	unspecified application
n-R5s33	Nuclear encoded rRNA 5S 33	17324959	1.714	0.00714	Other	other
n-R5s136	nuclear encoded rRNA 5S 136	17513976	2.008	0.00609	Other	other
n-R5s151	nuclear encoded rRNA 5S 151	17474128	1.908	0.00999	Other	other
n-R5s195	Nuclear encoded rRNA 5S 195	17404963	1.003	0.0285	Other	other
NCKAP5	NCK associated protein 5	17226447	-0.791	0.0278	Other	other
Nlrp1c-ps	NLR family, pyrin domain containing 1C, pseudogene	17265526	0.897	0.0151	Other	other
Olfr1372-ps1	olfactory receptor 1372, pseudogene 1	17262596	0.85	0.00684	Other	other
OTULINL	OTU deubiquitinase with linear linkage specificity like	17316197	0.577	0.0429	Other	other
Peak1os	pseudopodium-enriched atypical kinase 1, opposite strand	17517573	1.158	0.00169	Other	other
Peg13	paternally expressed 13	17317835	-0.677	0.0155	Other	other
PHF24	PHD finger protein 24	17413173	-0.531	0.0415	Other	other
PKIB	cAMP-dependent protein kinase inhibitor beta	17233373	0.679	0.00458	Other	other
PROB1	proline rich basic protein 1	17353626	-0.8	0.00169	Other	other
Proser3	proline and serine rich 3	17489124	-0.611	0.0425	Other	other
PRR11	proline rich 11	17267454	1.306	0.00253	Other	other
RASSF4	Ras association domain family member 4	17470060	0.778	0.00447	Other	other
Rnu3a	U3A small nuclear RNA	17232731	2.3	0.0289	Other	other
Rpl27-ps1	ribosomal protein L27, pseudogene 1	17229727	0.564	0.032	Other	other
Rpl7a-ps10	ribosomal protein L7A, pseudogene 10	17520602	0.823	0.000868	Other	other
Rps15a-ps5	ribosomal protein S15A, pseudogene 5	17450527	0.67	0.0291	Other	other
Rps19-ps3	ribosomal protein S19, pseudogene 3	17432781	0.807	0.0189	Other	other
Rps2-ps5	ribosomal protein S2, pseudogene 5	17301603	0.694	0.00865	Other	other
Rptoros	regulatory associated protein of MTOR, complex 1, opposite strand	17272934	-0.742	0.00244	Other	other
Scarletltr	Scarletltr, erythroid developmental long intergenic non-protein coding transcript	17518274	-0.65	0.0234	Other	other
Scarna9	small Cajal body-specific RNA 9	17524206	1.289	0.0455	Other	other
Sfta3-ps	surfactant associated 3, pseudogene	17281291	-0.837	0.00807	Other	other
SLC10A5	solute carrier family 10 member 5	17404122	-1.15	0.0068	Other	other
Slc2a4rg-ps	Slc2a4 regulator, pseudogene	17381035	-0.576	0.0271	Other	other
Snhg6	small nucleolar RNA host gene 6	17221186	1.01	0.0057	Other	other
Snhg15	small nucleolar RNA host gene 15	17260396	0.683	0.00773	Other	other
Snora33	small nucleolar RNA, H/ACA box 33	17239751	1.422	0.0212	Other	other
Snora36b	small nucleolar RNA, H/ACA box 36B	17220526	1.802	0.0472	Other	other
SNORD22	small nucleolar RNA, C/D box 22	17357126	0.798	0.00772	Other	other
Snord93	small nucleolar RNA, C/D box 93	17435249	2.297	0.00185	Other	other
SNORD15A	small nucleolar RNA, C/D box 15A	17493683	1.46	0.0355	Other	other
T2	brachyury 2	17333107	-0.547	0.0436	Other	other
Tas2r143	taste receptor, type 2, member 143	17457960	-0.8	0.0449	Other	other
TBKBP1	TBK1 binding protein 1	17268454	-0.582	0.0472	Other	other
Tbx3os1	T-box 3, opposite strand 1	17451936	-1.178	0.00573	Other	other
TCEAL9	transcription elongation factor A like 9	17537889	1.003	0.00447	Other	other
THEMIS2	thymocyte selection associated family member 2	17430906	0.818	0.00708	Other	other
TIFAB	TIFA inhibitor	17292990	0.562	0.0478	Other	other
TLNRD1	talin rod domain containing 1	17492943	-0.522	0.0369	Other	other
TM4SF19	transmembrane 4 L six family member 19	17324787	1.581	0.00101	Other	other
TMEM51	transmembrane protein 51	17432387	0.557	0.0179	Other	other
TMEM252	transmembrane protein 252	17358266	1.379	0.0041	Other	other
TMEM132D	transmembrane protein 132D	17453043	-0.668	0.00387	Other	other
Tmem181b-ps	transmembrane protein 181B, pseudogene	17340548	-0.6	0.0473	Other	other
TMEM86A	transmembrane protein 86A	17478263	0.773	0.00931	Other	other
TSPAN18	tetraspanin 18	17388435	-1.165	0.00399	Other	other
Ttc6	tetratricopeptide repeat domain 6	17275640	-0.789	0.0147	Other	other
TTC16	tetratricopeptide repeat domain 16	17383985	-0.551	0.0239	Other	other
TTC39C	tetratricopeptide repeat domain 39C	17348570	0.702	0.0026	Other	other
UBTD1	ubiquitin domain containing 1	17359488	0.736	0.000868	Other	other
USHBP1	USH1 protein network component harmonin binding protein 1	17510295	-0.677	0.0231	Other	other
Wfdc17	WAP four-disulfide core domain 17	17254289	1.983	0.00169	Other	other
WSCD1	WSC domain containing 1	17252292	-0.678	0.0224	Other	other
Zfas1	zinc finger, NFX1-type containing 1, antisense RNA 1	17379871	1.177	0.0287	Other	other
Zfp986/Zfp993	zinc finger protein 986	17421444	0.76	0.0118	Other	other
Zfp989/Znf41-ps	ZNF41, pseudogene	17421384	0.702	0.0293	Other	other
ZNF641	zinc finger protein 641	17321202	-0.71	0.0108	Other	other
SSU72	SSU72 homolog, RNA polymerase II CTD phosphatase	17422662	0.532	0.00865	Other	phosphatase
SBNO2	strawberry notch homolog 2	17242785	0.767	0.00329	Other	transcription regulator
MFSD1	major facilitator superfamily domain containing 1	17398180	0.768	0.0145	Other	transporter
SNX7	sorting nexin 7	17409826	1.031	0.0172	Other	transporter

## Sheet: nucleus
Symbol	Entrez Gene Name	Affymetrix/Gene Symbol - mouse (Entrez Gene)	Expr Log Ratio	Expr p-value	Location	Type(s)	Biomarker Application(s)	Drug(s)
AEN	apoptosis enhancing nuclease	17479303	0.532	0.044	Nucleus	enzyme
ATAD2	ATPase family AAA domain containing 2	17317233	0.733	0.0154	Nucleus	enzyme
CASZ1	castor zinc finger 1	17421735	-0.74	0.0193	Nucleus	enzyme
CTPS1	CTP synthase 1	17429454	1.258	0.000121	Nucleus	enzyme		cytidine triphosphate synthetase inhibitor
DDX5	DEAD-box helicase 5	17270974	-0.505	0.0268	Nucleus	enzyme	unspecified application
ESCO2	establishment of sister chromatid cohesion N-acetyltransferase 2	17307774	0.857	0.0464	Nucleus	enzyme
EXOSC7	exosome component 7	17523555	-0.685	0.000264	Nucleus	enzyme
FBL	fibrillarin	17475777	0.633	0.0496	Nucleus	enzyme
FIGNL1	fidgetin like 1	17260633	0.663	0.0136	Nucleus	enzyme
HELLS	helicase, lymphoid specific	17359212	0.808	0.0321	Nucleus	enzyme
KIF20B	kinesin family member 20B	17358838	0.982	0.0165	Nucleus	enzyme
MCM5	minichromosome maintenance complex component 5	17502583	0.646	0.0325	Nucleus	enzyme	disease progression
MCM6	minichromosome maintenance complex component 6	17226550	0.793	0.0062	Nucleus	enzyme
MGMT	O-6-methylguanine-DNA methyltransferase	17484271	0.516	0.0352	Nucleus	enzyme	diagnosis,efficacy,prognosis	O6-alkylguanine-DNA alkyltransferase inhibitor,O6-benzylguanine
MSRB1	methionine sulfoxide reductase B1	17334419	1.119	0.00552	Nucleus	enzyme
Mx1	MX dynamin-like GTPase 1	17332531	1.092	0.00238	Nucleus	enzyme
Mx2	MX dynamin-like GTPase 2	17327557	0.79	0.0345	Nucleus	enzyme
PARP3	poly(ADP-ribose) polymerase family member 3	17530703	0.566	0.0404	Nucleus	enzyme		bevacizumab/olaparib,olaparib,rucaparib
PNP	purine nucleoside phosphorylase	17299559	0.534	0.0423	Nucleus	enzyme		forodesine,PD 141955,purine nucleoside phosphorylase inhibitor
POLE2	DNA polymerase epsilon 2, accessory subunit	17281506	0.744	0.0105	Nucleus	enzyme		bortezomib/cladribine/rituximab,cladribine,cladribine/cytarabine/daunorubicin,cladribine/cytarabine/decitabine,cladribine/cytarabine/filgrastim,cladribine/cytarabine/filgrastim/idarubicin,cladribine/cytarabine/filgrastim/idarubicin/plerixafor,cladribine/cytarabine/filgrastim/mitoxantrone,cladribine/peginterferon alfa-2a,cladribine/recombinant interferon,cladribine/rituximab
POLE	DNA polymerase epsilon, catalytic subunit	17440465	0.696	0.0448	Nucleus	enzyme		bortezomib/cladribine/rituximab,cladribine,cladribine/cytarabine/daunorubicin,cladribine/cytarabine/decitabine,cladribine/cytarabine/filgrastim,cladribine/cytarabine/filgrastim/idarubicin,cladribine/cytarabine/filgrastim/idarubicin/plerixafor,cladribine/cytarabine/filgrastim/mitoxantrone,cladribine/peginterferon alfa-2a,cladribine/recombinant interferon,cladribine/rituximab,clofarabine,clofarabin…
RAG1	recombination activating 1	17388683	-0.628	0.0155	Nucleus	enzyme
RAN	RAN, member RAS oncogene family	17442823	0.847	0.00631	Nucleus	enzyme
RFC5	replication factor C subunit 5	17451867	0.564	0.0122	Nucleus	enzyme
RNF144A	ring finger protein 144A	17280315	-0.859	0.00227	Nucleus	enzyme
RRM1	ribonucleotide reductase catalytic subunit M1	17481102	1.025	0.0237	Nucleus	enzyme	efficacy,response to therapy	5-fluorouracil/gemcitabine,alemtuzumab/cyclophosphamide/fludarabine phosphate,alemtuzumab/cyclophosphamide/fludarabine phosphate/mitoxantrone,alemtuzumab/cyclophosphamide/fludarabine phosphate/rituximab,alemtuzumab/fludarabine phosphate,bevacizumab/gemcitabine,bortezomib/cladribine/rituximab,bosutinib/hydroxyurea/ponatinib,capecitabine/docetaxel/gemcitabine,capecitabine/gemcitabine,cetuximab/gemc…
RRM2	ribonucleotide reductase regulatory subunit M2	17274540	0.813	0.0116	Nucleus	enzyme		5-fluorouracil/gemcitabine,alemtuzumab/cyclophosphamide/fludarabine phosphate,alemtuzumab/cyclophosphamide/fludarabine phosphate/mitoxantrone,alemtuzumab/cyclophosphamide/fludarabine phosphate/rituximab,alemtuzumab/fludarabine phosphate,bevacizumab/gemcitabine,bortezomib/cladribine/rituximab,capecitabine/docetaxel/gemcitabine,capecitabine/gemcitabine,chlorambucil/fludarabine phosphate,cladribine,…
Slfn1	schlafen 1	17254171	0.732	0.0269	Nucleus	enzyme
SLFN13	schlafen family member 13	17266851	1.941	0.00132	Nucleus	enzyme
TDG	thymine DNA glycosylase	17313595	0.538	0.0312	Nucleus	enzyme
TET1	tet methylcytosine dioxygenase 1	17241512	-0.508	0.0381	Nucleus	enzyme
TET3	tet methylcytosine dioxygenase 3	17468157	-0.595	0.0241	Nucleus	enzyme
TOP2A	DNA topoisomerase II alpha	17268909	1.59	0.00407	Nucleus	enzyme	diagnosis,efficacy,prognosis,response to therapy	alemtuzumab/cyclophosphamide/fludarabine phosphate/mitoxantrone,AQ4N,arsenic trioxide/daunorubicin/tretinoin,arsenic trioxide/idarubicin/tretinoin,becatecarin,bevacizumab/etoposide,bortezomib/dexamethasone/doxorubicin,bortezomib/doxorubicin,capecitabine/epirubicin/oxaliplatin,carboplatin/doxorubicin,chlorambucil/epirubicin,chlorambucil/mitoxantrone/prednisone,chlorambucil/mitoxantrone/prednisone/…
TYMS	thymidylate synthetase	17446627	0.574	0.0302	Nucleus	enzyme	diagnosis,disease progression,efficacy,prognosis,response to therapy	1843U89,5-fluorouracil,5-fluorouracil/gemcitabine,5-fluorouracil/imiquimod,5-fluorouracil/irinotecan,5-fluorouracil/irinotecan/oxaliplatin,5-fluorouracil/oxaliplatin,bevacizumab/5-fluorouracil,bevacizumab/5-fluorouracil/irinotecan/oxaliplatin,bevacizumab/capecitabine,bevacizumab/capecitabine/irinotecan,bevacizumab/capecitabine/irinotecan/oxaliplatin,bevacizumab/capecitabine/oxaliplatin,bevacizuma…
ZDHHC1	zinc finger DHHC-type containing 1	17512440	-0.65	0.0174	Nucleus	enzyme
ZRANB3	zinc finger RANBP2-type containing 3	17226499	0.893	0.000264	Nucleus	enzyme
CLIC1	chloride intracellular channel 1	17336896	0.875	0.00521	Nucleus	ion channel
AURKB	aurora kinase B	17251485	0.767	0.0488	Nucleus	kinase		AMG 900,AT-9283,barasertib,BI 811283,chiauranib,CYC 116,danusertib,GSK1070916,ilorasertib,SKI-G-801,SNS 314,TAK-901,tozasertib,TTP607
BUB1	BUB1 mitotic checkpoint serine/threonine kinase	17391376	0.882	0.0429	Nucleus	kinase
BUB1B	BUB1 mitotic checkpoint serine/threonine kinase B	17374569	0.558	0.0482	Nucleus	kinase
CDK1	cyclin dependent kinase 1	17241692	1.374	0.00344	Nucleus	kinase	efficacy	AG 024322,alvocidib,AZD5438,dinaciclib,milciclib,riviciclib,roniciclib,zotiraciclib
CDKN1A	cyclin dependent kinase inhibitor 1A	17335467	1.452	0.0392	Nucleus	kinase	diagnosis,efficacy,prognosis,response to therapy
CHEK2	checkpoint kinase 2	17440575	0.671	0.0388	Nucleus	kinase		XL844
DBF4	DBF4 zinc finger	17445507	0.698	0.0382	Nucleus	kinase
DCK	deoxycytidine kinase	17438823	0.913	0.00255	Nucleus	kinase	efficacy,response to therapy	alemtuzumab/fludarabine phosphate,chlorambucil/cladribine,cladribine,cladribine/cyclophosphamide,cladribine/cytarabine/daunorubicin,cladribine/cytarabine/filgrastim,cladribine/cytarabine/filgrastim/mitoxantrone,cladribine/rituximab,cytarabine/dasatinib/filgrastim/fludarabine phosphate,cytarabine/dasatinib/filgrastim/fludarabine phosphate/idarubicin,cytarabine/daunorubicin/fludarabine phosphate,cy…
DYRK1B	dual specificity tyrosine phosphorylation regulated kinase 1B	17475787	-0.555	0.0224	Nucleus	kinase
FGR	FGR proto-oncogene, Src family tyrosine kinase	17419483	0.781	0.00479	Nucleus	kinase		atezolizumab/cobimetinib/vemurafenib,binimetinib/vemurafenib,cetuximab/irinotecan/vemurafenib,cetuximab/vemurafenib,cobimetinib/vemurafenib,crizotinib/vemurafenib,dabrafenib/trametinib/vemurafenib,ipilimumab/vemurafenib,irinotecan/panitumumab/vemurafenib,pembrolizumab/vemurafenib,rebastinib,trametinib/vemurafenib,vemurafenib
MAPKAPK3	MAPK activated protein kinase 3	17530863	0.627	0.000868	Nucleus	kinase	unspecified application
NDRG1	N-myc downstream regulated 1	17317652	0.695	0.0371	Nucleus	kinase
NEK6	NIMA related kinase 6	17370455	0.908	0.000211	Nucleus	kinase
NME2	NME/NM23 nucleoside diphosphate kinase 2	17267794	0.743	0.0293	Nucleus	kinase
PEG3	paternally expressed 3	17486110	-0.8	0.00227	Nucleus	kinase	diagnosis
PLK1	polo like kinase 1	17482739	0.943	0.00818	Nucleus	kinase	unspecified application	BI 2536,GSK461364,lipid encapsulated anti-PLK1 siRNA TKM-080301,MK1496,onvansertib,rigosertib,TAK-960,volasertib
PLK3	polo like kinase 3	17428766	0.521	0.0282	Nucleus	kinase
NR1D1	nuclear receptor subfamily 1 group D member 1	17268884	-1.549	0.000572	Nucleus	ligand-dependent nuclear receptor
NR3C2	nuclear receptor subfamily 3 group C member 2	17502626	-0.646	0.0122	Nucleus	ligand-dependent nuclear receptor		aldosterone receptor antagonist,AZD9977,beta-estradiol/progesterone,drospirenone,drospirenone/ethinyl estradiol,eplerenone,fludrocortisone,fludrocortisone acetate,hydrochlorothiazide/spironolactone,progesterone,spironolactone
NR4A2	nuclear receptor subfamily 4 group A member 2	17385374	-1.066	0.0369	Nucleus	ligand-dependent nuclear receptor
RARG	retinoic acid receptor gamma	17322181	-0.512	0.0132	Nucleus	ligand-dependent nuclear receptor		6-mercaptopurine/methotrexate/tretinoin,acitretin,adapalene,AGN 190299,alitretinoin,arsenic trioxide/daunorubicin/tretinoin,arsenic trioxide/gemtuzumab ozogamicin/tretinoin,arsenic trioxide/idarubicin/tretinoin,arsenic trioxide/tretinoin,cytarabine/daunorubicin/gemtuzumab ozogamicin/tretinoin,cytarabine/daunorubicin/tretinoin,cytarabine/idarubicin/tretinoin,daunorubicin/tretinoin,doxorubicin/tret…
THRA	thyroid hormone receptor alpha	17256138	-0.766	0.000212	Nucleus	ligand-dependent nuclear receptor		3,5-diiodothyropropionic acid,amiodarone,denosumab/levothyroxine,dextrothyroxine,L-triiodothyronine,levothyroxine,levothyroxine/l-triiodothyronine
AAAS	aladin WD repeat nucleoporin	17322200	0.524	0.0204	Nucleus	other
ADAP1	ArfGAP with dual PH domains 1	17454382	0.607	0.0145	Nucleus	other
AIF1	allograft inflammatory factor 1	17344289	0.874	0.018	Nucleus	other
AMMECR1	AMMECR nuclear protein 1	17545078	0.583	0.0075	Nucleus	other
ASF1B	anti-silencing function 1B histone chaperone	17503023	0.688	0.0218	Nucleus	other
C15orf48	chromosome 15 open reading frame 48	17375503	1.66	0.0121	Nucleus	other
CAPG	capping actin protein, gelsolin like	17459656	0.873	0.00109	Nucleus	other
CCNA2	cyclin A2	17404821	1.62	0.000788	Nucleus	other	efficacy,prognosis
CCNG1	cyclin G1	17261865	1.284	0.0116	Nucleus	other
CDC6	cell division cycle 6	17256225	0.572	0.0467	Nucleus	other
CDCA8	cell division cycle associated 8	17429896	0.662	0.0285	Nucleus	other
CENPE	centromere protein E	17402797	0.942	0.00709	Nucleus	other		GSK923295
CENPN	centromere protein N	17505913	0.754	0.0394	Nucleus	other
CHAF1B	chromatin assembly factor 1 subunit B	17327331	0.585	0.0272	Nucleus	other	unspecified application
CIB1	calcium and integrin binding 1	17492495	0.535	0.042	Nucleus	other
CSRP3	cysteine and glycine rich protein 3	17491368	-0.925	0.0448	Nucleus	other
ERH	ERH mRNA splicing and mitosis factor	17282274	0.838	0.0434	Nucleus	other
Fam13a	family with sequence similarity 13, member A	17467209	-0.884	0.00465	Nucleus	other
FAM205A	family with sequence similarity 205 member A	17424415	-1.259	0.00662	Nucleus	other
Firre	functional intergenic repeating RNA element	17541567	-0.658	0.0441	Nucleus	other
FYB1	FYN binding protein 1	17309981	0.926	0.0105	Nucleus	other
GADD45G	growth arrest and DNA damage inducible gamma	17287361	1.297	0.000423	Nucleus	other	efficacy
GMNC	geminin coiled-coil domain containing	17329500	-1.043	0.000462	Nucleus	other
H1-2	H1.2 linker histone, cluster member	17285859	1.101	0.00627	Nucleus	other
H1f1	H1.1 linker histone, cluster member	17285879	1.662	0.000264	Nucleus	other
H2AC7	H2A clustered histone 7	17285867	1.818	0.0337	Nucleus	other
H2AC11	H2A clustered histone 11	17291012	1.052	0.0156	Nucleus	other
H2AC14	H2A clustered histone 14	17285819	1.087	0.048	Nucleus	other
H2AW	H2A.W histone	17250178	-0.748	0.0314	Nucleus	other
H2BC3	H2B clustered histone 3	17285863	0.828	0.0414	Nucleus	other
H2BC6	H2B clustered histone 6	17290997	0.855	0.0149	Nucleus	other
H2BC14	H2B clustered histone 14	17285691	1.25	0.00288	Nucleus	other
H4C6	H4 clustered histone 6	17291208	0.769	0.0304	Nucleus	other
HCLS1	hematopoietic cell-specific Lyn substrate 1	17325438	0.965	0.00024	Nucleus	other
INTS6L	integrator complex subunit 6 like	17534909	-0.674	0.0493	Nucleus	other
JPT1	Jupiter microtubule associated homolog 1	17271920	0.532	0.00662	Nucleus	other	unspecified application
KHDRBS3	KH RNA binding domain containing, signal transduction associated 3	17312054	0.541	0.0472	Nucleus	other
KIF11	kinesin family member 11	17359020	1.018	0.038	Nucleus	other		4SC-205,ALN-VSP02,AZD4877,filanesib,ispinesib,litronesib,MK-0731,SB-743921
KIF15	kinesin family member 15	17523494	0.765	0.0131	Nucleus	other
KIF22	kinesin family member 22	17496568	0.656	0.0139	Nucleus	other	diagnosis,prognosis
KIF2C	kinesin family member 2C	17428803	0.962	0.0142	Nucleus	other
KNL1	kinetochore scaffold 1	17374692	1.024	0.00807	Nucleus	other
KNTC1	kinetochore associated 1	17442332	0.772	0.00139	Nucleus	other
LMNB1	lamin B1	17350740	0.711	0.0167	Nucleus	other
LMNTD1	lamin tail domain containing 1	17472752	-0.814	0.0344	Nucleus	other
LSM7	LSM7 homolog, U6 small nuclear RNA and mRNA degradation associated	17234800	0.615	0.0331	Nucleus	other
MAD2L1	mitotic arrest deficient 2 like 1	17459236	0.969	0.00758	Nucleus	other
Mapk1ip1	mitogen-activated protein kinase 1 interacting protein 1	17497414	-0.618	0.0347	Nucleus	other
MBD6	methyl-CpG binding domain protein 6	17245831	-0.618	0.0449	Nucleus	other
MED10	mediator complex subunit 10	17288414	0.677	0.0427	Nucleus	other
MIS18BP1	MIS18 binding protein 1	17281428	0.994	0.0179	Nucleus	other
MKI67	marker of proliferation Ki-67	17497334	1.297	0.0177	Nucleus	other	diagnosis,disease progression,efficacy,prognosis,response to therapy,unspecified application
MMS22L	MMS22 like, DNA repair protein	17412237	0.627	0.0223	Nucleus	other
MUSTN1	musculoskeletal, embryonic nuclear protein 1	17298262	-0.599	0.0261	Nucleus	other
MYOF	myoferlin	17364280	0.689	0.00478	Nucleus	other
NABP1	nucleic acid binding protein 1	17222825	0.783	0.00743	Nucleus	other
NAV2	neuron navigator 2	17478301	-0.926	0.000893	Nucleus	other
NCAPD2	non-SMC condensin I complex subunit D2	17471023	0.529	0.038	Nucleus	other
NCAPG2	non-SMC condensin II complex subunit G2	17279608	1.019	0.00588	Nucleus	other
NCAPG	non-SMC condensin I complex subunit G	17437278	0.733	0.0252	Nucleus	other
NDC80	NDC80 kinetochore complex component	17347042	1.19	0.00589	Nucleus	other
NOP56	NOP56 ribonucleoprotein	17376272	1.559	0.0443	Nucleus	other
NR2C2AP	nuclear receptor 2C2 associated protein	17501810	0.64	0.00309	Nucleus	other
NUF2	NUF2 component of NDC80 kinetochore complex	17229433	1.533	0.00635	Nucleus	other
NUP205	nucleoporin 205	17457249	0.589	0.0223	Nucleus	other
NUSAP1	nucleolar and spindle associated protein 1	17374833	1.094	0.00716	Nucleus	other
PELO	pelota mRNA surveillance and ribosome rescue factor	17296422	-0.558	0.0232	Nucleus	other
PHF11	PHD finger protein 11	17307280	1.143	0.000242	Nucleus	other
PLAC8	placenta associated 8	17450121	0.84	0.0493	Nucleus	other
Platr21	pluripotency associated transcript 21	17544845	-0.539	0.0191	Nucleus	other
PRC1	protein regulator of cytokinesis 1	17479575	1.283	0.018	Nucleus	other
PRICKLE1	prickle planar cell polarity protein 1	17320720	-0.793	0.000868	Nucleus	other
PRICKLE2	prickle planar cell polarity protein 2	17469121	-0.682	0.00945	Nucleus	other
PRX	periaxin	17475603	-0.697	0.0375	Nucleus	other
R3HDM2	R3H domain containing 2	17238002	-0.536	0.038	Nucleus	other
RAVER2	ribonucleoprotein, PTB binding 2	17415897	-0.657	0.00139	Nucleus	other
RCAN1	regulator of calcineurin 1	17332228	0.713	0.0126	Nucleus	other
RFC2	replication factor C subunit 2	17443114	0.565	0.0208	Nucleus	other
RPL3	ribosomal protein L3	17319403	0.618	0.0298	Nucleus	other		cytarabine/doxorubicin/filgrastim/omacetaxine mepesuccinate,omacetaxine mepesuccinate
RPL6	ribosomal protein L6	17441808	0.982	0.0443	Nucleus	other	unspecified application
SNRNP25	small nuclear ribonucleoprotein U11/U12 subunit 25	17248242	0.629	0.00236	Nucleus	other
SPDL1	spindle apparatus coiled-coil protein 1	17261710	0.698	0.0208	Nucleus	other
Speer4a (includes others)	spermatogenesis associated glutamate (E)-rich protein 4A	17445667	0.776	0.0042	Nucleus	other
STIL	STIL centriolar assembly protein	17417117	0.957	0.0302	Nucleus	other
SYNE1	spectrin repeat containing nuclear envelope protein 1	17238918	-1.199	0.00655	Nucleus	other
SYNE2	spectrin repeat containing nuclear envelope protein 2	17276396	-0.667	0.00399	Nucleus	other
TACC3	transforming acidic coiled-coil containing protein 3	17436457	0.787	0.00139	Nucleus	other
TAF1D	TATA-box binding protein associated factor, RNA polymerase I subunit D	17514824	1.241	0.038	Nucleus	other
THYN1	thymocyte nuclear protein 1	17515566	0.538	0.0312	Nucleus	other
TMA16	translation machinery associated 16 homolog	17509697	0.797	0.0192	Nucleus	other
TOX3	TOX high mobility group box family member 3	17511550	-0.697	0.00893	Nucleus	other
TPX2	TPX2 microtubule nucleation factor	17377793	1.061	0.0232	Nucleus	other
UTP14A	UTP14A small subunit processome component	17534569	0.604	0.048	Nucleus	other
ZMAT3	zinc finger matrin-type 3	17404585	0.674	0.00371	Nucleus	other
ZNF385A	zinc finger protein 385A	17322359	0.906	0.0157	Nucleus	other
ZWILCH	zwilch kinetochore protein	17528137	0.783	0.0148	Nucleus	other
BRINP1	BMP/retinoic acid inducible neural specific 1	17426434	0.698	0.0493	Nucleus	peptidase
ENC1	ectodermal-neural cortex 1	17289372	0.713	0.00108	Nucleus	peptidase
PSMB6	proteasome 20S subunit beta 6	17252070	0.607	0.023	Nucleus	peptidase
EYA1	EYA transcriptional coactivator and phosphatase 1	17221375	-0.595	0.0424	Nucleus	phosphatase
PPP2R3A	protein phosphatase 2 regulatory subunit B''alpha	17530159	-0.752	0.038	Nucleus	phosphatase
AFF3	AF4/FMR2 family member 3	17222465	-0.995	0.0018	Nucleus	transcription regulator
ASCL1	achaete-scute family bHLH transcription factor 1	17243839	-0.723	0.0172	Nucleus	transcription regulator	unspecified application
ATF3	activating transcription factor 3	17231033	0.918	0.000131	Nucleus	transcription regulator	unspecified application
ATF7	activating transcription factor 7	17322261	-0.818	0.0101	Nucleus	transcription regulator
ATF7IP	activating transcription factor 7 interacting protein	17463829	-0.561	0.0206	Nucleus	transcription regulator
BASP1	brain abundant membrane attached signal protein 1	17316175	0.625	0.00222	Nucleus	transcription regulator
BATF3	basic leucine zipper ATF-like transcription factor 3	17220787	0.677	0.0375	Nucleus	transcription regulator
BHLHE40	basic helix-loop-helix family member e40	17461414	0.731	0.0123	Nucleus	transcription regulator
CALCOCO1	calcium binding and coiled-coil domain 1	17322289	-0.817	0.00637	Nucleus	transcription regulator
CCND1	cyclin D1	17498502	0.663	0.0422	Nucleus	transcription regulator	diagnosis,efficacy,prognosis,response to therapy,unspecified application	arsenic trioxide,arsenic trioxide/cytarabine/methotrexate,arsenic trioxide/daunorubicin/tretinoin,arsenic trioxide/gemtuzumab ozogamicin/tretinoin,arsenic trioxide/idarubicin/tretinoin,arsenic trioxide/tretinoin
CHURC1	churchill domain containing 1	17276614	0.941	0.0191	Nucleus	transcription regulator
DACH1	dachshund family transcription factor 1	17309041	-0.758	0.00828	Nucleus	transcription regulator
DEPDC1	DEP domain containing 1	17403919	1.103	0.0064	Nucleus	transcription regulator
E2F8	E2F transcription factor 8	17491378	0.954	0.0243	Nucleus	transcription regulator
EBF1	EBF transcription factor 1	17248691	-0.841	0.0269	Nucleus	transcription regulator
EGR2	early growth response 2	17233993	0.927	0.000264	Nucleus	transcription regulator
EPAS1	endothelial PAS domain protein 1	17340197	-0.632	0.00535	Nucleus	transcription regulator	prognosis	PT-2385,PT2977
FHL5	four and a half LIM domains 5	17423665	1.377	0.0062	Nucleus	transcription regulator
FOSL1	FOS like 1, AP-1 transcription factor subunit	17356427	0.932	0.00489	Nucleus	transcription regulator		MORAb-202
FOXA1	forkhead box A1	17281337	-0.86	0.0102	Nucleus	transcription regulator	disease progression
FOXF1	forkhead box F1	17506291	-0.948	0.00519	Nucleus	transcription regulator
FOXJ2	forkhead box J2	17462705	-0.555	0.0345	Nucleus	transcription regulator
FOXR2	forkhead box R2	17538978	-0.527	0.025	Nucleus	transcription regulator
GATA2	GATA binding protein 2	17460634	-0.733	0.0272	Nucleus	transcription regulator
H2AX	H2A.X variant histone	17516558	1.073	0.0454	Nucleus	transcription regulator	efficacy
HDAC5	histone deacetylase 5	17270082	-0.602	0.0055	Nucleus	transcription regulator		belinostat,pyroxamide,tributyrin
HES6	hes family bHLH transcription factor 6	17225499	0.519	0.0132	Nucleus	transcription regulator
HIF1A	hypoxia inducible factor 1 subunit alpha	17276328	0.989	0.00843	Nucleus	transcription regulator	diagnosis,efficacy,prognosis,response to therapy	EZN 2968,PX 478
HMBOX1	homeobox containing 1	17307709	-0.549	0.0137	Nucleus	transcription regulator
HOXB4	homeobox B4	17255594	-0.655	0.0158	Nucleus	transcription regulator
HTATIP2	HIV-1 Tat interactive protein 2	17478352	0.642	0.0123	Nucleus	transcription regulator	efficacy
IFI16	interferon gamma inducible protein 16	17230045	2.679	0.000868	Nucleus	transcription regulator	unspecified application
IRF7	interferon regulatory factor 7	17497813	1.556	3.12e-05	Nucleus	transcription regulator
IRF8	interferon regulatory factor 8	17506279	0.558	0.0222	Nucleus	transcription regulator
IRX2	iroquois homeobox 2	17288442	-0.775	0.00211	Nucleus	transcription regulator
JUNB	JunB proto-oncogene, AP-1 transcription factor subunit	17511259	0.856	0.00348	Nucleus	transcription regulator	response to therapy
KLF2	Kruppel like factor 2	17502440	-0.989	0.0328	Nucleus	transcription regulator
KLF7	Kruppel like factor 7	17223766	-0.531	0.0451	Nucleus	transcription regulator
KLF12	Kruppel like factor 12	17309099	-1.307	0.00242	Nucleus	transcription regulator
KLF15	Kruppel like factor 15	17460826	-1.036	0.0153	Nucleus	transcription regulator
LITAF	lipopolysaccharide induced TNF factor	17328124	0.784	6.22e-05	Nucleus	transcription regulator
MAFB	MAF bZIP transcription factor B	17393868	1.394	0.000236	Nucleus	transcription regulator
MAML3	mastermind like transcriptional coactivator 3	17405154	-0.904	0.00595	Nucleus	transcription regulator
MECOM	MDS1 and EVI1 complex locus	17404503	-0.588	0.0419	Nucleus	transcription regulator	prognosis
Meis1	Meis homeobox 1	17260815	-0.863	0.000267	Nucleus	transcription regulator
MITF	melanocyte inducing transcription factor	17461132	0.673	0.00467	Nucleus	transcription regulator	unspecified application
MLIP	muscular LMNA interacting protein	17528947	-0.801	0.0142	Nucleus	transcription regulator
MYB	MYB proto-oncogene, transcription factor	17239664	-0.71	0.0148	Nucleus	transcription regulator
MYC	MYC proto-oncogene, bHLH transcription factor	17311846	0.936	6.85e-05	Nucleus	transcription regulator	diagnosis,efficacy,prognosis,response to therapy,unspecified application	AVI-4126,MYC-targeting siRNA DCR-MYC
NCOA4	nuclear receptor coactivator 4	17298510	0.545	0.0477	Nucleus	transcription regulator
NFIA	nuclear factor I A	17415606	-0.708	0.00658	Nucleus	transcription regulator
NFIX	nuclear factor I X	17511142	-0.635	0.045	Nucleus	transcription regulator
NFKBIE	NFKB inhibitor epsilon	17337927	0.637	0.0473	Nucleus	transcription regulator
NOCT	nocturnin	17397426	0.703	0.000572	Nucleus	transcription regulator
PCBD1	pterin-4 alpha-carbinolamine dehydratase 1	17233669	0.738	0.0497	Nucleus	transcription regulator
PHF1	PHD finger protein 1	17335000	-0.547	0.0275	Nucleus	transcription regulator
PLAGL1	PLAG1 like zinc finger 1	17231694	-0.655	0.00728	Nucleus	transcription regulator
PRDM6	PR/SET domain 6	17350639	-0.76	0.00811	Nucleus	transcription regulator
PRDM8	PR/SET domain 8	17439511	-1.148	0.00426	Nucleus	transcription regulator
RBL1	RB transcriptional corepressor like 1	17393684	0.552	0.0385	Nucleus	transcription regulator
RUNX1T1	RUNX1 partner transcriptional co-repressor 1	17411918	-0.697	0.0231	Nucleus	transcription regulator
SAP30	Sin3A associated protein 30	17509455	0.548	0.027	Nucleus	transcription regulator	unspecified application
SIX5	SIX homeobox 5	17474480	-0.752	0.00208	Nucleus	transcription regulator
SMAD6	SMAD family member 6	17528125	-0.832	0.0342	Nucleus	transcription regulator	unspecified application
SMARCA2	SWI/SNF related, matrix associated, actin dependent regulator of chromatin, subfamily a, member 2	17358375	-0.796	0.0114	Nucleus	transcription regulator
SOX11	SRY-box transcription factor 11	17280350	-0.775	0.0158	Nucleus	transcription regulator	unspecified application
SOX13	SRY-box transcription factor 13	17226974	-0.587	0.00542	Nucleus	transcription regulator
SPEN	spen family transcriptional repressor	17432202	-0.55	0.0388	Nucleus	transcription regulator
SPI1	Spi-1 proto-oncogene	17373177	0.767	0.00612	Nucleus	transcription regulator
TBX2	T-box transcription factor 2	17254591	-0.688	0.00529	Nucleus	transcription regulator
TBX3	T-box transcription factor 3	17441595	-1.053	0.000159	Nucleus	transcription regulator
TCF19	transcription factor 19	17344336	0.653	0.0178	Nucleus	transcription regulator
TEF	TEF transcription factor, PAR bZIP family member	17313376	-0.742	0.0223	Nucleus	transcription regulator
TFDP1	transcription factor Dp-1	17499310	0.612	0.0294	Nucleus	transcription regulator
TFEC	transcription factor EC	17464950	1.466	0.00131	Nucleus	transcription regulator
TLE2	TLE family member 2, transcriptional corepressor	17235757	-0.772	0.00949	Nucleus	transcription regulator
TRPS1	transcriptional repressor GATA binding 1	17316977	0.605	0.0478	Nucleus	transcription regulator	diagnosis,prognosis
VAV1	vav guanine nucleotide exchange factor 1	17338982	0.95	0.0027	Nucleus	transcription regulator
ZBTB4	zinc finger and BTB domain containing 4	17251728	-0.725	0.00214	Nucleus	transcription regulator
ZBTB20	zinc finger and BTB domain containing 20	17325723	-1.047	0.0204	Nucleus	transcription regulator
ZFHX3	zinc finger homeobox 3	17505313	-0.619	0.0439	Nucleus	transcription regulator
ZNF319	zinc finger protein 319	17511992	-0.723	0.0132	Nucleus	transcription regulator
ZNF616	zinc finger protein 616	17421476	1.028	0.00339	Nucleus	transcription regulator
ZNF705A	zinc finger protein 705A	17462729	1.213	0.00661	Nucleus	transcription regulator
Hnrnpa3	heterogeneous nuclear ribonucleoprotein A3	17372140	-0.77	0.0302	Nucleus	transporter
SMC2	structural maintenance of chromosomes 2	17414114	0.784	0.0165	Nucleus	transporter

## Sheet: extra_space
Symbol	Entrez Gene Name	Affymetrix/Gene Symbol - mouse (Entrez Gene)	Expr Log Ratio	Expr p-value	Location	Type(s)	Biomarker Application(s)	Drug(s)
CCL2	C-C motif chemokine ligand 2	17254059	1.909	0.0101	Extracellular Space	cytokine	diagnosis,efficacy,prognosis,response to therapy,safety,unspecified application	CNTO 888,mimosine
Ccl2	chemokine (C-C motif) ligand 2	17254041	2.351	5.88e-06	Extracellular Space	cytokine	unspecified application
Ccl6	chemokine (C-C motif) ligand 6	17266960	1.608	0.00447	Extracellular Space	cytokine
Ccl7	chemokine (C-C motif) ligand 7	17254047	1.376	0.000884	Extracellular Space	cytokine	unspecified application
Ccl9	chemokine (C-C motif) ligand 9	17266952	2.525	9.18e-05	Extracellular Space	cytokine	unspecified application
CCL3L3	C-C motif chemokine ligand 3 like 3	17266967	2.134	0.00163	Extracellular Space	cytokine	unspecified application
CMTM7	CKLF like MARVEL transmembrane domain containing 7	17531923	0.553	0.0132	Extracellular Space	cytokine
CXCL10	C-X-C motif chemokine ligand 10	17449718	1.841	0.00109	Extracellular Space	cytokine	diagnosis,efficacy,unspecified application	MDX-1100
CXCL13	C-X-C motif chemokine ligand 13	17439367	1.988	0.0155	Extracellular Space	cytokine	efficacy,unspecified application
CXCL16	C-X-C motif chemokine ligand 16	17265268	1.035	0.00363	Extracellular Space	cytokine	diagnosis,disease progression,unspecified application
CXCL17	C-X-C motif chemokine ligand 17	17487945	1.086	0.000408	Extracellular Space	cytokine
CYTL1	cytokine like 1	17437043	-0.976	0.0152	Extracellular Space	cytokine
FLT3LG	fms related receptor tyrosine kinase 3 ligand	17490628	-0.759	0.00356	Extracellular Space	cytokine
IL6	interleukin 6	17435725	1.074	0.00144	Extracellular Space	cytokine	diagnosis,disease progression,efficacy,prognosis,response to therapy,safety,unspecified application	clazakizumab,interleukin-6 receptor inhibitor,siltuximab,tocilizumab,ziltivekimab
IL1B	interleukin 1 beta	17391565	0.975	0.0223	Extracellular Space	cytokine	diagnosis,efficacy,prognosis	canakinumab,canakinumab/colchicine,canakinumab/INS,canakinumab/methotrexate,gallium nitrate,gevokizumab
IL1RN	interleukin 1 receptor antagonist	17367686	1.43	8.55e-05	Extracellular Space	cytokine	efficacy
LIF	LIF interleukin 6 family cytokine	17246810	0.656	0.016	Extracellular Space	cytokine	unspecified application
MIF	macrophage migration inhibitory factor	17241962	0.827	0.0167	Extracellular Space	cytokine	diagnosis,prognosis,response to therapy	imalumab
MYDGF	myeloid derived growth factor	17346175	0.636	0.0488	Extracellular Space	cytokine
PF4	platelet factor 4	17438969	1.27	0.000277	Extracellular Space	cytokine	diagnosis
Sectm1b	secreted and transmembrane 1B	17273447	1.176	8.16e-05	Extracellular Space	cytokine
SPP1	secreted phosphoprotein 1	17439830	3.31	7.96e-09	Extracellular Space	cytokine	diagnosis,efficacy,unspecified application
TIMP1	TIMP metallopeptidase inhibitor 1	17533713	2.631	0.000465	Extracellular Space	cytokine	diagnosis,disease progression,efficacy,prognosis,unspecified application
TNF	tumor necrosis factor	17344309	0.953	0.00399	Extracellular Space	cytokine	diagnosis,disease progression,efficacy,prognosis,response to therapy,safety,unspecified application	adalimumab,adalimumab/methotrexate,afelimomab,bevacizumab/docetaxel/prednisone/thalidomide/zoledronic acid,bortezomib/dexamethasone/pomalidomide,bortezomib/dexamethasone/thalidomide,bortezomib/thalidomide,certolizumab,certolizumab/methotrexate,cyclophosphamide/dexamethasone/thalidomide,dexamethasone/pomalidomide,dexamethasone/thalidomide,etanercept,etanercept/methotrexate,golimumab,golimumab/meth…
TNFSF14	TNF superfamily member 14	17346522	0.602	0.0105	Extracellular Space	cytokine		CERC-002
TNFSF18	TNF superfamily member 18	17218707	1.181	0.0379	Extracellular Space	cytokine
XCL1	X-C motif chemokine ligand 1	17229187	0.674	0.0285	Extracellular Space	cytokine	unspecified application
AOAH	acyloxyacyl hydrolase	17285586	1.487	0.000143	Extracellular Space	enzyme
DDHD1	DDHD domain containing 1	17305685	0.771	0.0102	Extracellular Space	enzyme
F13A1	coagulation factor XIII A chain	17291881	1.38	0.000748	Extracellular Space	enzyme
FAM20C	FAM20C golgi associated secretory pathway kinase	17443901	1.012	0.00231	Extracellular Space	enzyme
FN1	fibronectin 1	17224071	1.563	0.0157	Extracellular Space	enzyme	diagnosis,efficacy,prognosis,unspecified application	AS1409,iodine I 131 anti-fibronectin antibody fragment L19-SIP,L19-IL2 monoclonal antibody-cytokine fusion protein,L19-IL2 monoclonal antibody-cytokine fusion protein/L19TNFalpha,L19TNFalpha,ocriplasmin
HECW2	HECT, C2 and WW domain containing E3 ubiquitin protein ligase 2	17223080	-0.889	0.00908	Extracellular Space	enzyme
LIPF	lipase F, gastric type	17358724	1.218	0.000143	Extracellular Space	enzyme		acarbose/orlistat,orlistat
MYH14	myosin heavy chain 14	17490328	-0.507	0.0481	Extracellular Space	enzyme
PLA1A	phospholipase A1 member A	17330359	1.132	0.0121	Extracellular Space	enzyme
PLA2G7	phospholipase A2 group VII	17337796	1.994	4.75e-05	Extracellular Space	enzyme	diagnosis,efficacy	darapladib
PLD4	phospholipase D family member 4	17279404	1.252	0.00209	Extracellular Space	enzyme
PSAP	prosaposin	17233629	1.023	0.000355	Extracellular Space	enzyme	unspecified application
SMPDL3B	sphingomyelin phosphodiesterase acid like 3B	17430894	0.556	0.024	Extracellular Space	enzyme
AREG	amphiregulin	17439029	1.502	9.18e-05	Extracellular Space	growth factor	diagnosis,efficacy,prognosis,response to therapy
BMP6	bone morphogenetic protein 6	17286682	-1.071	0.0032	Extracellular Space	growth factor
CCN3	cellular communication network factor 3	17311519	-0.588	0.0295	Extracellular Space	growth factor
EREG	epiregulin	17439021	1.166	0.00121	Extracellular Space	growth factor	prognosis,response to therapy
FGF1	fibroblast growth factor 1	17353962	-0.784	0.00325	Extracellular Space	growth factor	prognosis	pentosan polysulfate
GDF3	growth differentiation factor 3	17470592	0.846	0.00544	Extracellular Space	growth factor
GRN	granulin precursor	17256959	0.88	0.03	Extracellular Space	growth factor
HBEGF	heparin binding EGF like growth factor	17353699	0.984	0.00554	Extracellular Space	growth factor	diagnosis,unspecified application	KHK2866,U3-1565
IGF1	insulin like growth factor 1	17236288	0.951	0.0199	Extracellular Space	growth factor	diagnosis,efficacy,prognosis,safety	BI 836845,MEDI-573
INHBA	inhibin subunit beta A	17285438	0.892	0.014	Extracellular Space	growth factor	diagnosis	activin type 2B receptor Fc fusion protein STM 343,garetosmab
KITLG	KIT ligand	17236900	-0.725	0.0119	Extracellular Space	growth factor	unspecified application
LTBP4	latent transforming growth factor beta binding protein 4	17488179	-1.227	0.0102	Extracellular Space	growth factor
PDGFC	platelet derived growth factor C	17398416	1.228	0.000461	Extracellular Space	growth factor
PGF	placental growth factor	17282664	0.935	0.00489	Extracellular Space	growth factor	diagnosis,disease progression,efficacy,prognosis	aflibercept,aflibercept/bevacizumab,aflibercept/irinotecan,RO5323441
VEGFA	vascular endothelial growth factor A	17345293	-0.615	0.00462	Extracellular Space	growth factor	diagnosis,efficacy,prognosis,safety,unspecified application	aflibercept,aflibercept/bevacizumab,aflibercept/irinotecan,atezolizumab/bevacizumab,bevacizumab,bevacizumab-IRDye 800CW,bevacizumab/5-fluorouracil,bevacizumab/5-fluorouracil/irinotecan/oxaliplatin,bevacizumab/capecitabine,bevacizumab/capecitabine/irinotecan,bevacizumab/capecitabine/irinotecan/oxaliplatin,bevacizumab/capecitabine/oxaliplatin,bevacizumab/capecitabine/temozolomide,bevacizumab/carmus…
Abi3bp	ABI gene family, member 3 (NESH) binding protein	17326318	-1.494	0.000695	Extracellular Space	other
ACRBP	acrosin binding protein	17463031	-0.707	0.0456	Extracellular Space	other
ADM	adrenomedullin	17481770	1.06	0.0364	Extracellular Space	other	prognosis,unspecified application
BMPER	BMP binding endothelial regulator	17515478	0.691	0.0427	Extracellular Space	other
BPIFB1	BPI fold containing family B member 1	17378149	-1.5	0.0231	Extracellular Space	other
C1QA	complement C1q A chain	17431619	2.055	3.42e-05	Extracellular Space	other
C1QB	complement C1q B chain	17431607	2.707	0.000242	Extracellular Space	other
C1QC	complement C1q C chain	17431612	2.033	0.00102	Extracellular Space	other
CCN4	cellular communication network factor 4	17312022	1.028	0.0111	Extracellular Space	other
CFAP57	cilia and flagella associated protein 57	17429245	-0.61	0.00978	Extracellular Space	other
CFP	complement factor properdin	17540521	0.878	0.00354	Extracellular Space	other
CHAD	chondroadherin	17255227	-2.391	2.76e-05	Extracellular Space	other
COL5A1	collagen type V alpha 1 chain	17368569	0.783	0.0473	Extracellular Space	other		collagenase clostridium histolyticum
COL5A2	collagen type V alpha 2 chain	17222719	1.103	0.0072	Extracellular Space	other		collagenase clostridium histolyticum
COL8A1	collagen type VIII alpha 1 chain	17331162	1.209	0.000688	Extracellular Space	other		collagenase clostridium histolyticum
COLQ	collagen like tail subunit of asymmetric acetylcholinesterase	17304768	-0.912	0.00209	Extracellular Space	other
CRISP1	cysteine rich secretory protein 1	17221520	-0.672	0.0352	Extracellular Space	other
CYRIB	CYFIP related Rac1 interactor B	17317486	0.976	0.000868	Extracellular Space	other
DLL4	delta like canonical Notch ligand 4	17374792	-0.728	0.038	Extracellular Space	other		MEDI0639,OMP-21M18,OMP-305B83,REGN421
DRC1	dynein regulatory complex subunit 1	17435786	-0.643	0.026	Extracellular Space	other
ECM2	extracellular matrix protein 2	17287148	-1.404	0.0272	Extracellular Space	other
EDIL3	EGF like repeats and discoidin domains 3	17288992	-0.9	0.00399	Extracellular Space	other
EMILIN2	elastin microfibril interfacer 2	17346975	0.814	0.00123	Extracellular Space	other
FGG	fibrinogen gamma chain	17398485	1.34	0.0275	Extracellular Space	other		F2
FJX1	four-jointed box kinase 1	17388725	0.651	0.00156	Extracellular Space	other
FST	follistatin	17296344	1.093	0.00368	Extracellular Space	other
GLIPR1	GLI pathogenesis related 1	17244949	0.983	0.03	Extracellular Space	other
GREM1	gremlin 1, DAN family BMP antagonist	17389467	1.622	0.00274	Extracellular Space	other	unspecified application
GREM2	gremlin 2, DAN family BMP antagonist	17230127	-0.656	0.0435	Extracellular Space	other
GSN	gelsolin	17370209	-1.034	0.000242	Extracellular Space	other	disease progression,efficacy
Hamp/Hamp2	hepcidin antimicrobial peptide	17489363	-3.881	3.12e-05	Extracellular Space	other
HMCN1	hemicentin 1	17227910	-1.134	0.00209	Extracellular Space	other
IGFBP3	insulin like growth factor binding protein 3	17260474	-1.622	0.000204	Extracellular Space	other	diagnosis,disease progression,efficacy,prognosis,safety
IGFBP6	insulin like growth factor binding protein 6	17315305	-0.98	0.0256	Extracellular Space	other
INSL6	insulin like 6	17363790	0.772	0.00096	Extracellular Space	other
ISG15	ISG15 ubiquitin like modifier	17434023	1.314	0.0044	Extracellular Space	other
LAMA1	laminin subunit alpha 1	17339223	1.088	0.00169	Extracellular Space	other
LAMA3	laminin subunit alpha 3	17348492	-0.76	0.0407	Extracellular Space	other	diagnosis
LAMC2	laminin subunit gamma 2	17228136	0.832	0.0337	Extracellular Space	other	diagnosis
LGALS1	galectin 1	17312829	1.405	0.00168	Extracellular Space	other	diagnosis,prognosis	OTX008
LGALS3	galectin 3	17299329	1.4	4.86e-05	Extracellular Space	other	diagnosis,unspecified application	GCS-100,GR-MD-02
LGALS12	galectin 12	17362342	-1.162	0.00126	Extracellular Space	other
LRG1	leucine rich alpha-2-glycoprotein 1	17346150	1.614	0.00438	Extracellular Space	other
MAMDC2	MAM domain containing 2	17363533	-1.114	0.0498	Extracellular Space	other
MTUS1	microtubule associated scaffold protein 1	17508907	-0.506	0.0223	Extracellular Space	other
NPFF	neuropeptide FF-amide peptide precursor	17322254	-0.603	0.018	Extracellular Space	other
Orm1 (includes others)	orosomucoid 1	17414729	1.254	0.0263	Extracellular Space	other
PCOLCE2	procollagen C-endopeptidase enhancer 2	17520425	-1.08	0.00796	Extracellular Space	other
PI16	peptidase inhibitor 16	17335506	-0.649	0.048	Extracellular Space	other
Prg4	proteoglycan 4 (megakaryocyte stimulating factor, articular superficial zone protein)	17227892	1.013	0.0272	Extracellular Space	other
PRR12	proline rich 12	17490551	-0.697	0.0369	Extracellular Space	other
RETN	resistin	17498722	-0.751	0.0495	Extracellular Space	other	diagnosis,efficacy
Saa3	serum amyloid A 3	17491193	3.238	0.00822	Extracellular Space	other
SERPINA3	serpin family A member 3	17278328	1.452	0.0241	Extracellular Space	other	unspecified application
SERPINE1	serpin family E member 1	17453819	1.761	5.34e-05	Extracellular Space	other	diagnosis,disease progression,efficacy,prognosis,safety	drotrecogin alfa
SLAMF8	SLAM family member 8	17229931	0.55	0.0181	Extracellular Space	other
SLAMF9	SLAM family member 9	17219546	1.27	0.00146	Extracellular Space	other
TFF2	trefoil factor 2	17343170	-1.449	0.0371	Extracellular Space	other
TGFBI	transforming growth factor beta induced	17287827	1.955	2.76e-05	Extracellular Space	other
THBS1	thrombospondin 1	17374488	1.511	0.0273	Extracellular Space	other	diagnosis,efficacy
THBS3	thrombospondin 3	17399347	-1.026	0.00109	Extracellular Space	other
TMCC2	transmembrane and coiled-coil domain family 2	17226874	-0.625	0.0128	Extracellular Space	other
TNC	tenascin C	17426365	3.233	0.000645	Extracellular Space	other	diagnosis,response to therapy	131I-tenatumomab,F16-IL2 fusion protein,iodine I 131 monoclonal antibody F16SIP
TNFAIP2	TNF alpha induced protein 2	17279131	0.606	0.0151	Extracellular Space	other
TNXB	tenascin XB	17336681	-1.027	0.00325	Extracellular Space	other
VCAN	versican	17294738	1.055	0.00665	Extracellular Space	other
VWF	von Willebrand factor	17463205	0.76	0.0136	Extracellular Space	other	diagnosis,efficacy,prognosis,unspecified application	caplacizumab,F8
ADAMTS4	ADAM metallopeptidase with thrombospondin type 1 motif 4	17219248	1.08	0.0316	Extracellular Space	peptidase
ADAMTS10	ADAM metallopeptidase with thrombospondin type 1 motif 10	17336086	-0.697	0.00968	Extracellular Space	peptidase	diagnosis
CFB	complement factor B	17344064	1.819	0.00131	Extracellular Space	peptidase	unspecified application	IONIS-FB-LRx
CFD	complement factor D	17235018	-1.063	0.0129	Extracellular Space	peptidase
CFI	complement factor I	17402572	0.867	0.0231	Extracellular Space	peptidase
CPXM1	carboxypeptidase X, M14 family member 1	17391623	0.767	0.0415	Extracellular Space	peptidase
LTF	lactotransferrin	17522555	1.467	0.00289	Extracellular Space	peptidase	efficacy,unspecified application
MMP3	matrix metallopeptidase 3	17514515	1.191	0.0394	Extracellular Space	peptidase	diagnosis,efficacy	marimastat
MMP8	matrix metallopeptidase 8	17514553	2.125	0.000222	Extracellular Space	peptidase	efficacy	marimastat,rebimastat
MMP12	matrix metallopeptidase 12	17514495	3.195	5.34e-05	Extracellular Space	peptidase	efficacy,unspecified application	marimastat
MMP13	matrix metallopeptidase 13	17514482	1.996	0.000116	Extracellular Space	peptidase	diagnosis	marimastat,prinomastat
MMP14	matrix metallopeptidase 14	17300279	1.253	0.0125	Extracellular Space	peptidase	diagnosis,prognosis,unspecified application	BT1718,marimastat,prinomastat,rebimastat
MMP15	matrix metallopeptidase 15	17504293	-0.782	0.00602	Extracellular Space	peptidase		marimastat
MMP19	matrix metallopeptidase 19	17238558	1.263	0.00135	Extracellular Space	peptidase		marimastat
MMP28	matrix metallopeptidase 28	17266911	-0.782	0.0142	Extracellular Space	peptidase		marimastat
MUC5B	mucin 5B, oligomeric mucus/gel-forming	17485098	-1.626	0.0056	Extracellular Space	peptidase
PAPPA	pappalysin 1	17414802	0.59	0.0321	Extracellular Space	peptidase	diagnosis
PLAT	plasminogen activator, tissue type	17499962	0.901	0.0166	Extracellular Space	peptidase	diagnosis,efficacy,prognosis,safety,unspecified application	6-aminocaproic acid
PLAU	plasminogen activator, urokinase	17297537	1.449	8.55e-05	Extracellular Space	peptidase	disease progression,efficacy,prognosis
PRSS8	serine protease 8	17496806	-0.713	0.0096	Extracellular Space	peptidase
PRSS22	serine protease 22	17341671	0.584	0.0369	Extracellular Space	peptidase
APOC2	apolipoprotein C2	17487361	1.118	0.00454	Extracellular Space	transporter	efficacy
APOE	apolipoprotein E	17487381	0.968	0.000249	Extracellular Space	transporter	diagnosis,efficacy,prognosis,unspecified application
LCN2	lipocalin 2	17383892	1.287	0.0232	Extracellular Space	transporter	diagnosis,unspecified application
NPC2	NPC intracellular cholesterol transporter 2	17282563	0.866	0.000477	Extracellular Space	transporter
TF	transferrin	17530243	0.69	0.021	Extracellular Space	transporter	efficacy,prognosis,safety,unspecified application	ferric carboxymaltose,MORAb-066,NKP-1339

## Sheet: cytoplasm
Symbol	Entrez Gene Name	Affymetrix/Gene Symbol - mouse (Entrez Gene)	Expr Log Ratio	Expr p-value	Location	Type(s)	Biomarker Application(s)	Drug(s)
ACOD1	aconitate decarboxylase 1	17302475	0.789	0.0382	Cytoplasm	enzyme
ACSL1	acyl-CoA synthetase long chain family member 1	17500996	-0.604	0.0196	Cytoplasm	enzyme	unspecified application
ACSS1	acyl-CoA synthetase short chain family member 1	17392690	-1.262	0.00184	Cytoplasm	enzyme
ACTC1	actin alpha cardiac muscle 1	17389510	-1.672	0.0202	Cytoplasm	enzyme
ADSS1	adenylosuccinate synthase 1	17279349	0.906	0.00215	Cytoplasm	enzyme
AKR1A1	aldo-keto reductase family 1 member A1	17428684	0.551	0.0122	Cytoplasm	enzyme		aldose reductase inhibitor
AKR1B10	aldo-keto reductase family 1 member B10	17457128	1.111	0.0101	Cytoplasm	enzyme	unspecified application
ALDH1A1	aldehyde dehydrogenase 1 family member A1	17358103	-0.727	0.00149	Cytoplasm	enzyme	diagnosis,disease progression	chlorpropamide,disulfiram
ALDH1B1	aldehyde dehydrogenase 1 family member B1	17413674	0.505	0.0431	Cytoplasm	enzyme
ALG8	ALG8 alpha-1,3-glucosyltransferase	17480327	0.555	0.0188	Cytoplasm	enzyme
AMD1	adenosylmethionine decarboxylase 1	17425276	0.897	0.0127	Cytoplasm	enzyme
Aox3	aldehyde oxidase 3	17213021	-1.56	0.000116	Cytoplasm	enzyme
APOBEC1	apolipoprotein B mRNA editing enzyme catalytic subunit 1	17470580	1.749	9.18e-05	Cytoplasm	enzyme
APRT	adenine phosphoribosyltransferase	17513771	0.652	0.00493	Cytoplasm	enzyme
ARG1	arginase 1	17239845	2.774	6.4e-05	Cytoplasm	enzyme	unspecified application
ARG2	arginase 2	17276776	0.857	0.0144	Cytoplasm	enzyme
ARHGDIB	Rho GDP dissociation inhibitor beta	17472210	0.697	0.0044	Cytoplasm	enzyme	diagnosis
ATAT1	alpha tubulin acetyltransferase 1	17344472	-0.525	0.019	Cytoplasm	enzyme
Atp5k	ATP synthase, H+ transporting, mitochondrial F1F0 complex, subunit E	17450741	0.701	0.0194	Cytoplasm	enzyme
B3GNT7	UDP-GlcNAc:betaGal beta-1,3-N-acetylglucosaminyltransferase 7	17215097	0.971	0.0166	Cytoplasm	enzyme
B4GALT5	beta-1,4-galactosyltransferase 5	17394694	0.929	0.00131	Cytoplasm	enzyme	unspecified application
B4GALT6	beta-1,4-galactosyltransferase 6	17352985	1.389	6.23e-05	Cytoplasm	enzyme
BLVRB	biliverdin reductase B	17475580	0.64	0.0423	Cytoplasm	enzyme
CA3	carbonic anhydrase 3	17396152	-2.551	0.000249	Cytoplasm	enzyme		acetazolamide,benzthiazide,chlorothiazide,chlorthalidone,hydrochlorothiazide,methazolamide,sulfacetamide,topiramate,trichloromethiazide
CA13	carbonic anhydrase 13	17396143	0.941	0.00447	Cytoplasm	enzyme		acetazolamide,benzthiazide,chlorothiazide,chlorthalidone,hydrochlorothiazide,methazolamide,sulfacetamide,topiramate,trichloromethiazide
Cbr2	carbonyl reductase 2	17273304	-0.651	0.00259	Cytoplasm	enzyme
CEMIP	cell migration inducing hyaluronidase 1	17492947	1.972	0.000868	Cytoplasm	enzyme
CES1	carboxylesterase 1	17511693	-0.61	0.00365	Cytoplasm	enzyme
CH25H	cholesterol 25-hydroxylase	17364111	2.194	0.000919	Cytoplasm	enzyme	unspecified application
CHST1	carbohydrate sulfotransferase 1	17373521	-0.644	0.00661	Cytoplasm	enzyme
CHST3	carbohydrate sulfotransferase 3	17241045	-0.678	0.0474	Cytoplasm	enzyme
CHST8	carbohydrate sulfotransferase 8	17489699	-0.519	0.0394	Cytoplasm	enzyme
CMBL	carboxymethylenebutenolidase homolog	17310816	0.538	0.0373	Cytoplasm	enzyme
COLGALT1	collagen beta(1-O)galactosyltransferase 1	17502280	0.671	0.00681	Cytoplasm	enzyme
COLGALT2	collagen beta(1-O)galactosyltransferase 2	17218233	-1.233	0.000607	Cytoplasm	enzyme
COX4I1	cytochrome c oxidase subunit 4I1	17506273	0.85	0.0056	Cytoplasm	enzyme
COX5A	cytochrome c oxidase subunit 5A	17517727	0.887	0.0299	Cytoplasm	enzyme
COX6A2	cytochrome c oxidase subunit 6A2	17496857	-0.944	0.0102	Cytoplasm	enzyme
Cox8b	cytochrome c oxidase subunit 8B	17497704	-0.854	0.0146	Cytoplasm	enzyme
CYBA	cytochrome b-245 alpha chain	17513672	1.316	5.63e-05	Cytoplasm	enzyme
CYBB	cytochrome b-245 beta chain	17540154	1.743	0.0016	Cytoplasm	enzyme
CYP1A1	cytochrome P450 family 1 subfamily A member 1	17517770	-1.716	0.000121	Cytoplasm	enzyme	diagnosis
Cyp2d22	cytochrome P450, family 2, subfamily d, polypeptide 22	17319625	-0.858	0.0321	Cytoplasm	enzyme
CYP2E1	cytochrome P450 family 2 subfamily E member 1	17484587	-1.2	0.016	Cytoplasm	enzyme	diagnosis
CYP2F1	cytochrome P450 family 2 subfamily F member 1	17475498	-0.857	0.0015	Cytoplasm	enzyme
CYP4B1	cytochrome P450 family 4 subfamily B member 1	17428477	-0.829	0.00935	Cytoplasm	enzyme
CYP4F8	cytochrome P450 family 4 subfamily F member 8	17336013	-1.07	0.00593	Cytoplasm	enzyme
CYP7B1	cytochrome P450 family 7 subfamily B member 1	17404245	1.004	0.00529	Cytoplasm	enzyme
DDO	D-aspartate oxidase	17232763	-0.538	0.0415	Cytoplasm	enzyme
DDX60	DExD/H-box helicase 60	17501440	0.689	0.013	Cytoplasm	enzyme
DERA	deoxyribose-phosphate aldolase	17463898	0.535	0.0219	Cytoplasm	enzyme
DESI2	desumoylating isopeptidase 2	17219974	-1.114	0.0141	Cytoplasm	enzyme
DHRS1	dehydrogenase/reductase 1	17306856	0.551	0.0493	Cytoplasm	enzyme
DHRS9	dehydrogenase/reductase 9	17371427	1.1	0.00124	Cytoplasm	enzyme
DHX58	DExH-box helicase 58	17269595	0.651	0.00426	Cytoplasm	enzyme
DIAPH3	diaphanous related formin 3	17308965	1.136	0.0012	Cytoplasm	enzyme
DSE	dermatan sulfate epimerase	17240190	0.946	0.0139	Cytoplasm	enzyme
EXT1	exostosin glycosyltransferase 1	17317015	0.726	0.0486	Cytoplasm	enzyme
FDPS	farnesyl diphosphate synthase	17406908	0.795	0.0167	Cytoplasm	enzyme		alendronate/cholecalciferol,alendronic acid,ibandronic acid,minodronate,pamidronic acid,risedronic acid,zoledronic acid
FERMT3	fermitin family member 3	17362223	0.95	0.00161	Cytoplasm	enzyme
FMO1	flavin containing dimethylaniline monoxygenase 1	17229020	-1.456	8.37e-06	Cytoplasm	enzyme
FMO2	flavin containing dimethylaniline monoxygenase 2	17229036	-0.667	0.0177	Cytoplasm	enzyme
FMO3	flavin containing dimethylaniline monoxygenase 3	17229059	-1.16	0.00238	Cytoplasm	enzyme
FUCA1	alpha-L-fucosidase 1	17419965	0.712	0.00809	Cytoplasm	enzyme
GALNS	galactosamine (N-acetyl)-6-sulfatase	17513779	0.901	0.00538	Cytoplasm	enzyme
GARS1	glycyl-tRNA synthetase 1	17458771	0.607	0.0498	Cytoplasm	enzyme
GATM	glycine amidinotransferase	17390810	1.34	0.00117	Cytoplasm	enzyme
GBA	glucosylceramidase beta	17399333	0.82	0.000595	Cytoplasm	enzyme
GDA	guanine deaminase	17363470	1.536	0.000281	Cytoplasm	enzyme
GEN1	GEN1 Holliday junction 5' flap endonuclease	17279962	0.622	0.0381	Cytoplasm	enzyme
GLA	galactosidase alpha	17544517	0.975	0.00024	Cytoplasm	enzyme		migalastat
GLRX	glutaredoxin	17288716	1.113	0.027	Cytoplasm	enzyme
GM2A	GM2 ganglioside activator	17249801	0.783	0.0183	Cytoplasm	enzyme
GNPDA1	glucosamine-6-phosphate deaminase 1	17353948	0.978	0.00768	Cytoplasm	enzyme
GNPTAB	N-acetylglucosamine-1-phosphate transferase subunits alpha and beta	17236339	0.628	0.032	Cytoplasm	enzyme
GPX1	glutathione peroxidase 1	17521681	0.953	0.0119	Cytoplasm	enzyme	diagnosis,efficacy
GSR	glutathione-disulfide reductase	17500478	0.629	0.0132	Cytoplasm	enzyme		carmustine,carmustine/prednisone
GSTM5	glutathione S-transferase mu 5	17409154	-0.521	0.00144	Cytoplasm	enzyme	diagnosis,prognosis
GUCY1A1	guanylate cyclase 1 soluble subunit alpha 1	17406221	-1.064	5.64e-05	Cytoplasm	enzyme		isosorbide dinitrate,isosorbide-5-mononitrate,nitroprusside
GUCY1B1	guanylate cyclase 1 soluble subunit beta 1	17406205	-0.613	0.00579	Cytoplasm	enzyme		isosorbide dinitrate,isosorbide-5-mononitrate,nitroprusside
GUSB	glucuronidase beta	17453160	1.16	0.000183	Cytoplasm	enzyme
HACD4	3-hydroxyacyl-CoA dehydratase 4	17427051	0.838	0.03	Cytoplasm	enzyme
HEXA	hexosaminidase subunit alpha	17517947	1.165	0.000911	Cytoplasm	enzyme
HEXB	hexosaminidase subunit beta	17295278	1.72	5.34e-05	Cytoplasm	enzyme
HMGCS2	3-hydroxy-3-methylglutaryl-CoA synthase 2	17400862	-1.027	0.0172	Cytoplasm	enzyme	unspecified application
HMOX1	heme oxygenase 1	17502573	1.651	0.000264	Cytoplasm	enzyme	efficacy,safety,unspecified application	tin mesoporphyrin
HPGD	15-hydroxyprostaglandin dehydrogenase	17501250	-0.898	0.0206	Cytoplasm	enzyme	prognosis	glycyrrhetinic acid
HPGDS	hematopoietic prostaglandin D synthase	17467269	1.597	3.13e-05	Cytoplasm	enzyme
HPRT1	hypoxanthine phosphoribosyltransferase 1	17534720	0.902	0.0497	Cytoplasm	enzyme		6-mercaptopurine,6-mercaptopurine/methotrexate,6-mercaptopurine/methotrexate/tretinoin,6-mercaptopurine/prednisone,6-mercaptopurine/prednisone/thioguanine,6-mercaptopurine/vincristine,azathioprine,cyclophosphamide/cytarabine/6-mercaptopurine,cytarabine/daunorubicin/thioguanine,cytarabine/thioguanine,dasatinib/6-mercaptopurine/methotrexate,daunorubicin/etoposide/6-mercaptopurine/mitoxantrone/predn…
HSPA1A/HSPA1B	heat shock protein family A (Hsp70) member 1A	17344132	-1.319	0.0237	Cytoplasm	enzyme	unspecified application
HYAL1	hyaluronidase 1	17521428	-0.722	0.0375	Cytoplasm	enzyme		diclofenac/hyaluronic acid,hyaluronic acid,hylan
IFI30	IFI30 lysosomal thiol reductase	17510136	1.189	0.00236	Cytoplasm	enzyme
INMT	indolethylamine N-methyltransferase	17467062	-1.022	0.000955	Cytoplasm	enzyme
IRS1	insulin receptor substrate 1	17224878	-1.009	0.00184	Cytoplasm	enzyme	efficacy
KYNU	kynureninase	17370527	1.143	0.000868	Cytoplasm	enzyme
LACC1	laccase domain containing 1	17308772	1.105	0.00447	Cytoplasm	enzyme
LIPA	lipase A, lysosomal acid type	17364114	1.349	0.0414	Cytoplasm	enzyme	unspecified application
LPCAT2	lysophosphatidylcholine acyltransferase 2	17503841	1.17	0.000465	Cytoplasm	enzyme
LPL	lipoprotein lipase	17501633	1.235	0.000295	Cytoplasm	enzyme	efficacy,unspecified application	atorvastatin/niacin,lovastatin/niacin,nicotinic acid,nicotinic acid/pioglitazone,tyloxapol
MAN2B1	mannosidase alpha class 2B member 1	17503397	0.849	0.0105	Cytoplasm	enzyme
MAT2A	methionine adenosyltransferase 2A	17467753	-0.7	0.0411	Cytoplasm	enzyme		AG-270
MBOAT1	membrane bound O-acyltransferase domain containing 1	17286254	0.69	0.0108	Cytoplasm	enzyme
MGAT3	beta-1,4-mannosyl-glycoprotein 4-beta-N-acetylglucosaminyltransferase	17313087	-0.524	0.0446	Cytoplasm	enzyme
MGAT4A	alpha-1,3-mannosyl-glycoprotein 4-beta-N-acetylglucosaminyltransferase A	17222332	0.759	0.0105	Cytoplasm	enzyme
MTHFD2	methylenetetrahydrofolate dehydrogenase (NADP+ dependent) 2, methenyltetrahydrofolate cyclohydrolase	17468143	0.666	0.0112	Cytoplasm	enzyme
MTHFD1L	methylenetetrahydrofolate dehydrogenase (NADP+ dependent) 1 like	17231387	0.668	0.00399	Cytoplasm	enzyme
MYH6	myosin heavy chain 6	17306532	-1.558	0.0389	Cytoplasm	enzyme
MYL7	myosin light chain 7	17260236	-1.368	0.00851	Cytoplasm	enzyme
MYO5A	myosin VA	17519394	1.136	0.000465	Cytoplasm	enzyme
MYO7A	myosin VIIA	17493467	0.614	0.00691	Cytoplasm	enzyme	unspecified application
NAA80	N-alpha-acetyltransferase 80, NatH catalytic subunit	17521441	-0.583	0.0388	Cytoplasm	enzyme	unspecified application
NAGLU	N-acetyl-alpha-glucosaminidase	17256502	0.73	0.0348	Cytoplasm	enzyme	unspecified application
NARS1	asparaginyl-tRNA synthetase 1	17355009	0.613	0.0163	Cytoplasm	enzyme
NCF1	neutrophil cytosolic factor 1	17453288	0.997	8.07e-05	Cytoplasm	enzyme	efficacy
NCF2	neutrophil cytosolic factor 2	17218261	0.995	0.000196	Cytoplasm	enzyme
NCF4	neutrophil cytosolic factor 4	17312700	0.879	0.000868	Cytoplasm	enzyme
Nedd4	neural precursor cell expressed, developmentally down-regulated 4	17548726	-0.813	0.00453	Cytoplasm	enzyme
NPL	N-acetylneuraminate pyruvate lyase	17228234	0.624	0.0265	Cytoplasm	enzyme
NUS1	NUS1 dehydrodolichyl diphosphate synthase subunit	17233294	0.654	0.00266	Cytoplasm	enzyme
OAS1	2'-5'-oligoadenylate synthetase 1	17452115	1.739	0.00487	Cytoplasm	enzyme
OAS2	2'-5'-oligoadenylate synthetase 2	17452054	1.096	0.0028	Cytoplasm	enzyme
OAS3	2'-5'-oligoadenylate synthetase 3	17452070	0.732	0.0186	Cytoplasm	enzyme
PDE1B	phosphodiesterase 1B	17315606	0.604	0.0272	Cytoplasm	enzyme
PDE3A	phosphodiesterase 3A	17464040	-0.656	0.00983	Cytoplasm	enzyme		amrinone,anagrelide,cilostazol,dipyridamole,dyphylline,enoximone,medorinone,milrinone,pentoxifylline,theophylline,tolbutamide
PDE5A	phosphodiesterase 5A	17402321	-1.009	0.000868	Cytoplasm	enzyme	diagnosis	ambrisentan/tadalafil,aspirin/dipyridamole,aspirin/dipyridamole/telmisartan,avanafil,cGMP phosphodiesterase inhibitor,dipyridamole,dyphylline,pentoxifylline,sildenafil,tadalafil,theophylline,tolbutamide,udenafil,vardenafil
PDE8B	phosphodiesterase 8B	17295059	-1.077	0.000462	Cytoplasm	enzyme		ketotifen
PGD	phosphogluconate dehydrogenase	17433040	0.616	0.0161	Cytoplasm	enzyme
PGM1	phosphoglucomutase 1	17415815	0.502	0.0171	Cytoplasm	enzyme
PLA2G15	phospholipase A2 group XV	17505060	0.885	0.00999	Cytoplasm	enzyme
PLCB4	phospholipase C beta 4	17376728	-0.617	0.0492	Cytoplasm	enzyme
PLCG2	phospholipase C gamma 2	17505995	0.622	0.0012	Cytoplasm	enzyme
PLCL2	phospholipase C like 2	17338521	0.591	0.0155	Cytoplasm	enzyme
PLD3	phospholipase D family member 3	17488292	1.129	0.00227	Cytoplasm	enzyme
POR	cytochrome p450 oxidoreductase	17443286	-0.765	0.00146	Cytoplasm	enzyme		carboplatin/doxorubicin,cisplatin/doxorubicin,cisplatin/doxorubicin/ifosfamide,cisplatin/doxorubicin/ifosfamide/methotrexate,cisplatin/doxorubicin/methotrexate,dacarbazine/doxorubicin,dacarbazine/doxorubicin/ifosfamide,daunorubicin,daunorubicin/tretinoin,doxorubicin,doxorubicin/ifosfamide,doxorubicin/streptozocin,doxorubicin/tretinoin,nitazoxanide,nitazoxanide/peginterferon alfa-2a/ribavirin
PPA1	inorganic pyrophosphatase 1	17233720	0.799	0.0243	Cytoplasm	enzyme
PPIC	peptidylprolyl isomerase C	17354378	0.835	0.0342	Cytoplasm	enzyme
PRDX5	peroxiredoxin 5	17362101	0.766	0.00156	Cytoplasm	enzyme	unspecified application	auranofin
PSAT1	phosphoserine aminotransferase 1	17363204	0.764	0.0152	Cytoplasm	enzyme
PTGES	prostaglandin E synthase	17383712	0.775	0.0042	Cytoplasm	enzyme	prognosis
PTGS1	prostaglandin-endoperoxide synthase 1	17370309	0.91	0.00246	Cytoplasm	enzyme	efficacy	8Z,11Z,14Z-eicosatrienoic acid,acetaminophen,acetaminophen/aspirin/caffeine,acetaminophen/aspirin/codeine,acetaminophen/butalbital,acetaminophen/butalbital/caffeine,acetaminophen/butalbital/caffeine/codeine,acetaminophen/caffeine/chlorpheniramine/hydrocodone/phenylephrine,acetaminophen/caffeine/dihydrocodeine,acetaminophen/cetirizine/prednisolone,acetaminophen/clemastine/pseudoephedrine,acetamino…
PYGL	glycogen phosphorylase L	17281721	0.735	0.000569	Cytoplasm	enzyme
RAB32	RAB32, member RAS oncogene family	17239227	0.88	0.00575	Cytoplasm	enzyme
RAB8B	RAB8B, member RAS oncogene family	17528405	0.809	0.0199	Cytoplasm	enzyme
RABL2A	RAB, member of RAS oncogene family like 2A	17320556	-0.589	0.0343	Cytoplasm	enzyme
RENBP	renin binding protein	17542501	0.929	0.00163	Cytoplasm	enzyme
RGS4	regulator of G protein signaling 4	17229454	1.207	0.0039	Cytoplasm	enzyme
RGS6	regulator of G protein signaling 6	17277017	-0.742	0.00419	Cytoplasm	enzyme
RGS9	regulator of G protein signaling 9	17271209	-0.553	0.0142	Cytoplasm	enzyme
RGS16	regulator of G protein signaling 16	17218321	0.934	0.0165	Cytoplasm	enzyme		AGS-16M18
RNF128	ring finger protein 128	17538096	0.791	0.044	Cytoplasm	enzyme
RNF149	ring finger protein 149	17222549	1.002	0.000121	Cytoplasm	enzyme
RNF180	ring finger protein 180	17295996	0.595	0.0394	Cytoplasm	enzyme
RNF19B	ring finger protein 19B	17418916	0.502	0.00609	Cytoplasm	enzyme
RRAD	RRAD, Ras related glycolysis inhibitor and calcium channel regulator	17512321	0.633	0.044	Cytoplasm	enzyme
RSAD2	radical S-adenosyl methionine domain containing 2	17280327	1.167	0.000868	Cytoplasm	enzyme
SAT1	spermidine/spermine N1-acetyltransferase 1	17545595	0.829	0.00638	Cytoplasm	enzyme	diagnosis
SDHAF4	succinate dehydrogenase complex assembly factor 4	17221786	0.517	0.0296	Cytoplasm	enzyme
SEPHS2	selenophosphate synthetase 2	17496651	0.599	0.0208	Cytoplasm	enzyme
SESN2	sestrin 2	17430861	0.752	0.0461	Cytoplasm	enzyme
SGPL1	sphingosine-1-phosphate lyase 1	17241162	0.925	0.00922	Cytoplasm	enzyme
SRXN1	sulfiredoxin 1	17377666	0.702	0.00267	Cytoplasm	enzyme
ST3GAL4	ST3 beta-galactoside alpha-2,3-sialyltransferase 4	17525329	0.564	0.0451	Cytoplasm	enzyme
TALDO1	transaldolase 1	17484881	0.553	0.0481	Cytoplasm	enzyme
TKT	transketolase	17298183	0.501	0.0261	Cytoplasm	enzyme
TMOD1	tropomodulin 1	17413770	-0.929	0.0144	Cytoplasm	enzyme
TMTC1	transmembrane O-mannosyltransferase targeting cadherins 1	17472955	-0.733	0.00493	Cytoplasm	enzyme
TMTC2	transmembrane O-mannosyltransferase targeting cadherins 2	17244661	-0.637	0.0234	Cytoplasm	enzyme
TTLL6	tubulin tyrosine ligase like 6	17255511	-0.686	0.0198	Cytoplasm	enzyme
UBE2C	ubiquitin conjugating enzyme E2 C	17379523	1.205	0.00662	Cytoplasm	enzyme
UQCRB	ubiquinol-cytochrome c reductase binding protein	17293863	-0.629	0.0454	Cytoplasm	enzyme
UQCRQ	ubiquinol-cytochrome c reductase complex III subunit VII	17262650	0.722	0.00518	Cytoplasm	enzyme
UXS1	UDP-glucuronate decarboxylase 1	17222650	0.601	0.0125	Cytoplasm	enzyme
ZDHHC14	zinc finger DHHC-type palmitoyltransferase 14	17332766	-0.532	0.0453	Cytoplasm	enzyme
CLIC5	chloride intracellular channel 5	17337852	-0.514	0.00986	Cytoplasm	ion channel
CKB	creatine kinase B	17284114	0.734	0.035	Cytoplasm	kinase	safety
CKMT2	creatine kinase, mitochondrial 2	17294816	-0.845	0.0172	Cytoplasm	kinase
DGKH	diacylglycerol kinase eta	17308842	-0.683	0.0345	Cytoplasm	kinase
HCK	HCK proto-oncogene, Src family tyrosine kinase	17377870	0.757	0.00865	Cytoplasm	kinase		bosutinib,bosutinib/hydroxyurea/ponatinib,bosutinib/imatinib,bosutinib/ponatinib,bosutinib/rituximab,rebastinib
HK2	hexokinase 2	17468018	0.543	0.0324	Cytoplasm	kinase
HK3	hexokinase 3	17292775	0.689	0.0102	Cytoplasm	kinase
HYKK	hydroxylysine kinase	17517448	-0.663	0.0193	Cytoplasm	kinase
IKBKE	inhibitor of nuclear factor kappa B kinase subunit epsilon	17226771	0.607	0.015	Cytoplasm	kinase
IRAK4	interleukin 1 receptor associated kinase 4	17314460	0.635	0.00772	Cytoplasm	kinase		CA-4948,PF-06650833
MAP4K2	mitogen-activated protein kinase kinase kinase kinase 2	17356811	-0.737	0.00983	Cytoplasm	kinase
MAPK10	mitogen-activated protein kinase 10	17450283	-0.643	0.0342	Cytoplasm	kinase		binimetinib/cetuximab/encorafenib,binimetinib/encorafenib,binimetinib/encorafenib/panitumumab,cetuximab/encorafenib,cobimetinib/encorafenib,encorafenib,encorafenib/panitumumab,encorafenib/trametinib
MAPK13	mitogen-activated protein kinase 13	17335383	0.765	0.0112	Cytoplasm	kinase		talmapimod
MELK	maternal embryonic leucine zipper kinase	17413528	0.819	0.0312	Cytoplasm	kinase		OTS167
MLKL	mixed lineage kinase domain like pseudokinase	17513076	0.766	0.00258	Cytoplasm	kinase
MYLK	myosin light chain kinase	17325159	-0.712	0.00399	Cytoplasm	kinase	prognosis	K-252
PBK	PDZ binding kinase	17301428	1.177	0.00132	Cytoplasm	kinase
PDK2	pyruvate dehydrogenase kinase 2	17268120	-0.738	0.00568	Cytoplasm	kinase	unspecified application
PFKL	phosphofructokinase, liver type	17242376	0.574	0.0148	Cytoplasm	kinase
PGK1	phosphoglycerate kinase 1	17537088	0.958	0.00118	Cytoplasm	kinase
PIK3CD	phosphatidylinositol-4,5-bisphosphate 3-kinase catalytic subunit delta	17433169	0.604	0.0364	Cytoplasm	kinase		acalisib,ACP-196/ACP-319,ACP-319,BGB-10188,bimiralisib,BR101801,buparlisib,CLR457,copanlisib,dactolisib,dezapelisib,duvelisib,GS-9901,idelalisib,idelalisib/ofatumumab,idelalisib/rituximab,KA2237,nemiralisib,parsaclisib,pictilisib,pilaralisib,PWT143,PX-866,SF 1126,SHC014748M,tenalisib,theophylline,umbralisib,YY-20394
PIK3CG	phosphatidylinositol-4,5-bisphosphate 3-kinase catalytic subunit gamma	17280609	0.844	0.00179	Cytoplasm	kinase		bimiralisib,buparlisib,CLR457,dactolisib,PI3Kg inhibitor,pictilisib,pilaralisib,PX-866,SF 1126,tenalisib
PIK3R5	phosphoinositide-3-kinase regulatory subunit 5	17251303	0.994	0.000283	Cytoplasm	kinase
PIM1	Pim-1 proto-oncogene, serine/threonine kinase	17335540	0.75	0.0072	Cytoplasm	kinase	disease progression,prognosis	AZD-1208,LGH447,PIM/FLT3 kinase inhibitor SEL24,SGI 1776
PIP4K2A	phosphatidylinositol-5-phosphate 4-kinase type 2 alpha	17382038	0.631	0.0157	Cytoplasm	kinase
PKM	pyruvate kinase M1/2	17518007	0.795	0.00387	Cytoplasm	kinase	unspecified application	CAP-232
PLK4	polo like kinase 4	17397268	0.777	0.042	Cytoplasm	kinase		CFI-400945
PRKCE	protein kinase C epsilon	17340177	-0.89	0.00149	Cytoplasm	kinase	disease progression	ingenol mebutate,protein kinase C-epsilon activator
PRKD2	protein kinase D2	17474181	-0.71	0.0163	Cytoplasm	kinase
TAOK2	TAO kinase 2	17496452	-0.536	0.0272	Cytoplasm	kinase
TK1	thymidine kinase 1	17272594	0.585	0.0251	Cytoplasm	kinase	diagnosis,prognosis
Mir1192	microRNA 1192	17358219	-0.926	0.0072	Cytoplasm	microRNA
Mir5110	microRNA 5110	17267184	-0.653	0.0368	Cytoplasm	microRNA
mir-8	microRNA 200c	17433975	-1.171	0.00169	Cytoplasm	microRNA	diagnosis,unspecified application
mir-30	microRNA 30a	17317708	-0.963	0.00493	Cytoplasm	microRNA	unspecified application
mir-103	microRNA 107	17376508	-0.834	0.0368	Cytoplasm	microRNA	unspecified application
mir-133	microRNA 133b	17380764	0.968	0.0235	Cytoplasm	microRNA	unspecified application
mir-181	microRNA 181a-2	17217846	-1.183	0.0379	Cytoplasm	microRNA	unspecified application
mir-674	microRNA 674	17374468	-0.546	0.0466	Cytoplasm	microRNA
ADAP2	ArfGAP with dual PH domains 2	17253885	0.603	0.0332	Cytoplasm	other
ANKRD37	ankyrin repeat domain 37	17509139	1.354	0.000244	Cytoplasm	other
ANLN	anillin actin binding protein	17524969	1.471	0.0054	Cytoplasm	other
ARAP2	ArfGAP with RhoGAP domain, ankyrin repeat and PH domain 2	17448174	-0.54	0.0381	Cytoplasm	other
ARAP3	ArfGAP with RhoGAP domain, ankyrin repeat and PH domain 3	17353881	-1.052	0.000535	Cytoplasm	other
ARHGAP19	Rho GTPase activating protein 19	17364707	0.788	0.0049	Cytoplasm	other	disease progression
ARHGAP25	Rho GTPase activating protein 25	17468612	0.681	0.0132	Cytoplasm	other
ARHGAP32	Rho GTPase activating protein 32	17515786	-0.64	0.0391	Cytoplasm	other
ARHGAP11A	Rho GTPase activating protein 11A	17389481	0.934	0.00875	Cytoplasm	other
ARHGEF15	Rho guanine nucleotide exchange factor 15	17264448	-1.019	0.00076	Cytoplasm	other
ARL6IP5	ADP ribosylation factor like GTPase 6 interacting protein 5	17461124	0.659	0.0298	Cytoplasm	other
ARPC3	actin related protein 2/3 complex subunit 3	17442096	0.504	0.0224	Cytoplasm	other
ARRB2	arrestin beta 2	17252013	0.891	5.34e-05	Cytoplasm	other
AXIN2	axin 2	17257801	-0.633	0.0103	Cytoplasm	other
BCL2A1	BCL2 related protein A1	17520171	1.362	0.00131	Cytoplasm	other
BEX3	brain expressed X-linked 3	17537895	1.107	0.0193	Cytoplasm	other
BIRC5	baculoviral IAP repeat containing 5	17258867	1.002	0.0144	Cytoplasm	other	diagnosis,disease progression,efficacy,prognosis,response to therapy,unspecified application	EZN 3042,gataparsen
BLOC1S2	biogenesis of lysosomal organelles complex 1 subunit 2	17365072	0.685	0.0243	Cytoplasm	other
C19orf12	chromosome 19 open reading frame 12	17476872	0.53	0.0285	Cytoplasm	other
CARD19	caspase recruitment domain family member 19	17292426	0.515	0.0028	Cytoplasm	other
CASQ2	calsequestrin 2	17401041	-0.792	0.0204	Cytoplasm	other	unspecified application
CCDC88C	coiled-coil domain containing 88C	17283303	-0.576	0.0443	Cytoplasm	other
CCNB2	cyclin B2	17528586	1.362	0.00516	Cytoplasm	other
CCT7	chaperonin containing TCP1 subunit 7	17460293	0.51	0.0496	Cytoplasm	other
Cd52	CD52 antigen	17431174	1.026	0.0051	Cytoplasm	other
CD177	CD177 molecule	17487759	2.483	1.17e-06	Cytoplasm	other
CEP70	centrosomal protein 70	17520687	-0.709	0.0333	Cytoplasm	other
CEP112	centrosomal protein 112	17257760	-0.562	0.0165	Cytoplasm	other
CEP85L	centrosomal protein 85 like	17240819	-0.742	0.0288	Cytoplasm	other
Ces1f	carboxylesterase 1F	17511731	-0.948	0.00476	Cytoplasm	other
CFAP74	cilia and flagella associated protein 74	17422521	-0.679	0.0205	Cytoplasm	other
CHMP4B	charged multivesicular body protein 4B	17378260	0.536	0.00407	Cytoplasm	other
CIDEB	cell death inducing DFFA like effector b	17306867	0.886	0.00487	Cytoplasm	other
CIDEC	cell death inducing DFFA like effector c	17469754	-0.841	0.032	Cytoplasm	other
CIP2A	cellular inhibitor of PP2A	17326081	1.097	0.0343	Cytoplasm	other
CKAP2	cytoskeleton associated protein 2	17508025	1.51	0.00144	Cytoplasm	other
CKAP4	cytoskeleton associated protein 4	17243617	0.636	0.0398	Cytoplasm	other
CLEC14A	C-type lectin domain containing 14A	17281350	-0.774	0.000748	Cytoplasm	other
CLU	clusterin	17301452	0.884	0.018	Cytoplasm	other	efficacy,unspecified application	clusterin antisense oligonucleotide
CNN1	calponin 1	17515402	-1.101	0.0339	Cytoplasm	other
CORO1B	coronin 1B	17356160	0.607	0.0298	Cytoplasm	other
CORO2A	coronin 2A	17425058	0.81	0.000283	Cytoplasm	other
COTL1	coactosin like F-actin binding protein 1	17513491	1.18	0.000245	Cytoplasm	other
CRISPLD2	cysteine rich secretory protein LCCL domain containing 2	17506206	-0.681	0.0167	Cytoplasm	other
CYTH3	cytohesin 3	17444372	-0.784	0.0113	Cytoplasm	other
CYTH4	cytohesin 4	17312759	1.146	0.000131	Cytoplasm	other
DDIAS	DNA damage induced apoptosis suppressor	17493358	1.031	0.00076	Cytoplasm	other
DENND3	DENN domain containing 3	17312097	-0.653	0.0136	Cytoplasm	other
DEPTOR	DEP domain containing MTOR interacting protein	17311533	-0.533	0.0286	Cytoplasm	other
DIXDC1	DIX domain containing 1	17526881	-0.655	0.024	Cytoplasm	other
DNAH10	dynein axonemal heavy chain 10	17442609	-0.577	0.0301	Cytoplasm	other
DNAJC12	DnaJ heat shock protein family (Hsp40) member C12	17233920	0.519	0.00865	Cytoplasm	other
DNAJC15	DnaJ heat shock protein family (Hsp40) member C15	17308800	0.752	0.0346	Cytoplasm	other
DNAJC19	DnaJ heat shock protein family (Hsp40) member C19	17404682	-0.642	0.0416	Cytoplasm	other
DOCK6	dedicator of cytokinesis 6	17524775	-1.017	0.0041	Cytoplasm	other
DOCK9	dedicator of cytokinesis 9	17309580	-0.832	0.00173	Cytoplasm	other
DTX3	deltex E3 ubiquitin ligase 3	17245772	-0.541	0.0364	Cytoplasm	other
ECT2	epithelial cell transforming 2	17404402	1.584	0.0077	Cytoplasm	other
ESYT1	extended synaptotagmin 1	17246163	0.65	0.0204	Cytoplasm	other
FAM162A	family with sequence similarity 162 member A	17330135	0.519	0.0341	Cytoplasm	other
FAU	FAU ubiquitin like and ribosomal protein S30 fusion	17331573	0.597	0.0421	Cytoplasm	other
FBXL12	F-box and leucine rich repeat protein 12	17524426	-0.703	0.0385	Cytoplasm	other
FHDC1	FH2 domain containing 1	17406363	-1.211	0.0015	Cytoplasm	other
FIBIN	fin bud initiation factor homolog	17389157	-1.347	0.000364	Cytoplasm	other
FNIP2	folliculin interacting protein 2	17406066	0.787	0.000868	Cytoplasm	other
FSCN1	fascin actin-bundling protein 1	17444267	0.865	0.00267	Cytoplasm	other	unspecified application
FUNDC2	FUN14 domain containing 2	17535951	0.686	0.028	Cytoplasm	other
GIMAP1	GTPase, IMAP family member 1	17458379	-0.556	0.0375	Cytoplasm	other
GLCCI1	glucocorticoid induced 1	17456001	-0.566	0.0355	Cytoplasm	other
GLIPR2	GLI pathogenesis related 2	17413500	0.903	0.000572	Cytoplasm	other
GTSE1	G2 and S-phase expressed 1	17313895	1.028	0.00288	Cytoplasm	other
HEBP1	heme binding protein 1	17472063	0.82	0.00236	Cytoplasm	other
HYDIN	HYDIN axonemal central pair apparatus protein	17505505	-0.739	0.0195	Cytoplasm	other
ICA1	islet cell autoantigen 1	17464803	-0.78	0.00662	Cytoplasm	other	unspecified application
IER3	immediate early response 3	17337228	0.598	0.0301	Cytoplasm	other	unspecified application
Ifi27l2a/Ifi27l2b	interferon, alpha-inducible protein 27 like 2A	17283549	1.626	0.00084	Cytoplasm	other
KANK3	KN motif and ankyrin repeat domains 3	17336175	-0.68	0.0414	Cytoplasm	other
KIAA1217	KIAA1217	17367390	-0.59	0.026	Cytoplasm	other
KIF23	kinesin family member 23	17527934	0.83	0.0167	Cytoplasm	other
KIF20A	kinesin family member 20A	17349433	0.92	0.0157	Cytoplasm	other
KRT8	keratin 8	17322113	0.607	0.0159	Cytoplasm	other	prognosis
KRT18	keratin 18	17315245	0.686	0.0344	Cytoplasm	other	efficacy
LCP2	lymphocyte cytosolic protein 2	17248380	0.739	0.00529	Cytoplasm	other
LIMCH1	LIM and calponin homology domains 1	17437887	-0.715	0.000503	Cytoplasm	other
LIMS2	LIM zinc finger domain containing 2	17349209	-0.651	0.0152	Cytoplasm	other
Lst1	leukocyte specific transcript 1	17344303	0.994	0.00574	Cytoplasm	other
Lypd2	Ly6/Plaur domain containing 2	17317994	-1.389	0.00192	Cytoplasm	other
LZTS2	leucine zipper tumor suppressor 2	17359796	-0.669	0.00184	Cytoplasm	other
MBLAC2	metallo-beta-lactamase domain containing 2	17288903	-0.548	0.034	Cytoplasm	other
MCC	MCC regulator of WNT signaling pathway	17354189	-0.971	0.00101	Cytoplasm	other
MCEMP1	mast cell expressed membrane protein 1	17498730	1.275	0.000671	Cytoplasm	other
MCTP1	multiple C2 and transmembrane domain containing 1	17288780	0.804	0.00373	Cytoplasm	other
MCUB	mitochondrial calcium uniporter dominant negative subunit beta	17410332	0.681	0.0214	Cytoplasm	other
METRNL	meteorin like, glial cell differentiation regulator	17259679	0.526	0.0314	Cytoplasm	other
METTL7A	methyltransferase like 7A	17315002	-0.848	0.00677	Cytoplasm	other
MFSD12	major facilitator superfamily domain containing 12	17235701	0.592	0.0157	Cytoplasm	other
MICOS13	mitochondrial contact site and cristae organizing system subunit 13	17346311	0.688	0.0465	Cytoplasm	other
MID2	midline 2	17538171	-0.571	0.0472	Cytoplasm	other
MPDU1	mannose-P-dolichol utilization defect 1	17264824	0.521	0.0196	Cytoplasm	other
MPEG1	macrophage expressed 1	17357810	1.608	0.000616	Cytoplasm	other		CFI-402257
MS4A4A	membrane spanning 4-domains A4A	17357640	1.927	0.000211	Cytoplasm	other
Mt1	metallothionein 1	17503942	0.842	0.00339	Cytoplasm	other
Mt2	metallothionein 2	17503937	1.491	0.00149	Cytoplasm	other
MTCL1	microtubule crosslinking factor 1	17346817	-0.636	0.00132	Cytoplasm	other
MYL4	myosin light chain 4	17257221	-0.935	0.00208	Cytoplasm	other
MYO6	myosin VI	17519821	-0.688	0.0302	Cytoplasm	other
MYO1F	myosin IF	17336114	1.044	0.000399	Cytoplasm	other
MYO5C	myosin VC	17519438	-0.567	0.0131	Cytoplasm	other
NAIP	NLR family apoptosis inhibitory protein	17295569	1.26	0.00158	Cytoplasm	other
NECAP2	NECAP endocytosis associated 2	17432124	0.501	0.0248	Cytoplasm	other
Nrbp2	nuclear receptor binding protein 2	17318312	-0.54	0.0375	Cytoplasm	other
NTPCR	nucleoside-triphosphatase, cancer-related	17506891	0.684	0.00552	Cytoplasm	other
NUDCD2	NudC domain containing 2	17248512	0.611	0.0293	Cytoplasm	other
OSBPL6	oxysterol binding protein like 6	17372197	-0.87	0.00175	Cytoplasm	other
PARVG	parvin gamma	17313721	0.708	0.013	Cytoplasm	other
PDCD6	programmed cell death 6	17294368	0.534	0.0498	Cytoplasm	other
PHACTR1	phosphatase and actin regulator 1	17286838	-0.668	0.0132	Cytoplasm	other
PIK3AP1	phosphoinositide-3-kinase adaptor protein 1	17364642	0.53	0.0195	Cytoplasm	other
PLEK	pleckstrin	17260761	1.412	0.000204	Cytoplasm	other
PLEKHG5	pleckstrin homology and RhoGEF domain containing G5	17422066	-0.557	0.0397	Cytoplasm	other
PLEKHO2	pleckstrin homology domain containing O2	17528274	0.68	0.0077	Cytoplasm	other
PLIN3	perilipin 3	17346216	0.541	0.0155	Cytoplasm	other
Pln	phospholamban	17233323	-1.235	0.00286	Cytoplasm	other
Pmaip1	phorbol-12-myristate-13-acetate-induced protein 1	17351414	0.528	0.0226	Cytoplasm	other
PREX1	phosphatidylinositol-3,4,5-trisphosphate dependent Rac exchange factor 1	17394582	0.515	0.0105	Cytoplasm	other
PREX2	phosphatidylinositol-3,4,5-trisphosphate dependent Rac exchange factor 2	17211131	-0.747	0.0226	Cytoplasm	other
Prss44	protease, serine 44	17522458	-0.501	0.0296	Cytoplasm	other
PSD3	pleckstrin and Sec7 domain containing 3	17509752	-0.692	0.0243	Cytoplasm	other
PSMD2	proteasome 26S subunit, non-ATPase 2	17324034	0.502	0.0443	Cytoplasm	other		bortezomib,bortezomib/cladribine/rituximab,bortezomib/dexamethasone,bortezomib/dexamethasone/doxorubicin,bortezomib/dexamethasone/lenalidomide,bortezomib/dexamethasone/pomalidomide,bortezomib/dexamethasone/rituximab,bortezomib/dexamethasone/thalidomide,bortezomib/doxorubicin,bortezomib/fulvestrant,bortezomib/lenalidomide,bortezomib/paclitaxel,bortezomib/prednisone,bortezomib/rituximab,bortezomib/…
PSMD8	proteasome 26S subunit, non-ATPase 8	17488743	0.963	0.00397	Cytoplasm	other
PSRC1	proline and serine rich coiled-coil 1	17401710	0.871	0.00487	Cytoplasm	other
PSTPIP1	proline-serine-threonine phosphatase interacting protein 1	17517554	0.689	0.0042	Cytoplasm	other
RAB3IL1	RAB3A interacting protein like 1	17357425	0.868	0.00478	Cytoplasm	other
RASGEF1A	RasGEF domain family member 1A	17462202	-0.744	0.0167	Cytoplasm	other
RBM3	RNA binding motif protein 3	17540027	0.551	0.0236	Cytoplasm	other
RGS22	regulator of G protein signaling 22	17316443	-0.832	0.0131	Cytoplasm	other
RILPL2	Rab interacting lysosomal protein like 2	17452853	0.775	0.0112	Cytoplasm	other
RIN2	Ras and Rab interactor 2	17377177	-0.598	0.0146	Cytoplasm	other
RMDN2	regulator of microtubule dynamics 2	17339902	-1.351	0.00617	Cytoplasm	other
Rpl32	ribosomal protein L32	17469936	0.823	0.00642	Cytoplasm	other
Rpl29 (includes others)	ribosomal protein L29	17521204	0.856	0.0125	Cytoplasm	other
RPL7A	ribosomal protein L7a	17519954	0.515	0.0305	Cytoplasm	other
RPS2	ribosomal protein S2	17334404	2.091	0.0345	Cytoplasm	other
RPS10	ribosomal protein S10	17342761	0.712	0.0318	Cytoplasm	other
RPS12	ribosomal protein S12	17360842	0.771	0.0116	Cytoplasm	other		neomycin
Rtp3	receptor transporter protein 3	17531693	-0.966	0.00128	Cytoplasm	other
S100A4	S100 calcium binding protein A4	17399802	0.982	0.000943	Cytoplasm	other	disease progression
S100A8	S100 calcium binding protein A8	17399823	1.451	0.0232	Cytoplasm	other	diagnosis,efficacy,unspecified application
S100A9	S100 calcium binding protein A9	17407363	1.047	0.0325	Cytoplasm	other	diagnosis,unspecified application
S100A10	S100 calcium binding protein A10	17400000	0.641	0.0467	Cytoplasm	other
S100B	S100 calcium binding protein B	17234494	0.902	0.00288	Cytoplasm	other	diagnosis,efficacy
Serpinb9b	serine (or cysteine) peptidase inhibitor, clade B, member 9b	17286375	1.018	0.0108	Cytoplasm	other
SGIP1	SH3GL interacting endocytic adaptor 1	17416061	-0.801	0.014	Cytoplasm	other
SH2B2	SH2B adaptor protein 2	17453714	0.671	0.0042	Cytoplasm	other
SH3BGRL	SH3 domain binding glutamate rich protein like	17537199	0.703	0.0173	Cytoplasm	other
SH3BP2	SH3 domain binding protein 2	17436607	1.066	0.000158	Cytoplasm	other
SH3PXD2A	SH3 and PX domains 2A	17365476	-0.575	0.0272	Cytoplasm	other
SH3PXD2B	SH3 and PX domains 2B	17248288	1.104	0.000868	Cytoplasm	other
SHC4	SHC adaptor protein 4	17390980	0.751	0.0355	Cytoplasm	other
SKAP2	src kinase associated phosphoprotein 2	17466783	0.502	0.0429	Cytoplasm	other
Slfn2	schlafen 2	17254166	1.092	0.000943	Cytoplasm	other
SLN	sarcolipin	17517360	-1.689	0.0191	Cytoplasm	other
SORBS3	sorbin and SH3 domain containing 3	17308257	-0.78	0.0339	Cytoplasm	other
SPC25	SPC25 component of NDC80 kinetochore complex	17386161	0.741	0.0482	Cytoplasm	other
SPRY1	sprouty RTK signaling antagonist 1	17397170	-0.812	0.0114	Cytoplasm	other
SSR4	signal sequence receptor subunit 4	17535697	0.61	0.0115	Cytoplasm	other
STARD8	StAR related lipid transfer domain containing 8	17536463	-0.799	9.89e-05	Cytoplasm	other
STARD9	StAR related lipid transfer domain containing 9	17375111	-0.735	0.0119	Cytoplasm	other
STARD13	StAR related lipid transfer domain containing 13	17455578	-0.595	0.0142	Cytoplasm	other
Stfa2/Stfa2l1	stefin A2	17325324	1.932	0.000408	Cytoplasm	other
STING1	stimulator of interferon response cGAMP interactor 1	17353663	1.248	0.00487	Cytoplasm	other		GSK3745417,IMSA101,MIW815,MK-1454,SB 11285
STPG1	sperm tail PG-rich repeat containing 1	17419857	-0.543	0.0377	Cytoplasm	other
STXBP6	syntaxin binding protein 6	17280897	-0.62	0.014	Cytoplasm	other
SYDE1	synapse defective Rho GTPase homolog 1	17242535	-0.685	0.0296	Cytoplasm	other
TBC1D2	TBC1 domain family member 2	17425077	0.636	0.00892	Cytoplasm	other
TBC1D30	TBC1 domain family member 30	17245466	-0.994	0.00156	Cytoplasm	other
TCTEX1D4	Tctex1 domain containing 4	17417647	0.592	0.039	Cytoplasm	other
Tlr13	toll-like receptor 13	17537081	2.441	3.12e-05	Cytoplasm	other
TMC5	transmembrane channel like 5	17482133	0.868	0.00412	Cytoplasm	other
TMEM192	transmembrane protein 192	17501508	0.523	0.0275	Cytoplasm	other
TMEM258	transmembrane protein 258	17357478	0.569	0.0313	Cytoplasm	other
TMEM106A	transmembrane protein 106A	17256784	1.262	0.000211	Cytoplasm	other
TNFAIP8L2	TNF alpha induced protein 8 like 2	17407716	0.625	0.0187	Cytoplasm	other
TNIP3	TNFAIP3 interacting protein 3	17459196	2.079	8.55e-05	Cytoplasm	other
TNNT2	troponin T2, cardiac type	17217651	-1.359	0.0029	Cytoplasm	other	diagnosis,efficacy,prognosis,safety,unspecified application
TNRC6B	trinucleotide repeat containing adaptor 6B	17313169	-0.602	0.0148	Cytoplasm	other
Trim30a/Trim30d	tripartite motif-containing 30A	17494394	0.795	0.0298	Cytoplasm	other
TUBA1C	tubulin alpha 1c	17314693	0.887	0.00399	Cytoplasm	other		6-mercaptopurine/vincristine,bevacizumab/docetaxel,bevacizumab/docetaxel/prednisone/thalidomide/zoledronic acid,bevacizumab/paclitaxel,bevacizumab/paclitaxel/pemetrexed,bevacizumab/paclitaxel/topotecan,capecitabine/docetaxel,capecitabine/docetaxel/gemcitabine,capecitabine/docetaxel/oxaliplatin/trastuzumab,cevipabulin,colchicine,colchicine/probenecid,cyclophosphamide/daunorubicin/imatinib/predniso…
TUBB6	tubulin beta 6 class V	17351465	1.006	0.00399	Cytoplasm	other
TUBG1	tubulin gamma 1	17256549	0.531	0.00939	Cytoplasm	other		6-mercaptopurine/vincristine,bevacizumab/docetaxel,bevacizumab/docetaxel/prednisone/thalidomide/zoledronic acid,bevacizumab/paclitaxel,bevacizumab/paclitaxel/pemetrexed,bevacizumab/paclitaxel/topotecan,capecitabine/docetaxel,capecitabine/docetaxel/gemcitabine,capecitabine/docetaxel/oxaliplatin/trastuzumab,cevipabulin,colchicine,colchicine/probenecid,cyclophosphamide/daunorubicin/imatinib/predniso…
TXLNB	taxilin beta	17231789	-1.052	0.00243	Cytoplasm	other
UNC93B1	unc-93 homolog B1, TLR signaling regulator	17356002	0.721	0.0323	Cytoplasm	other
WAS	WASP actin nucleation promoting factor	17539997	0.791	0.00326	Cytoplasm	other
WDR63	WD repeat domain 63	17410984	-0.613	0.032	Cytoplasm	other
WSB2	WD repeat and SOCS box containing 2	17441412	0.523	0.00442	Cytoplasm	other
ZBP1	Z-DNA binding protein 1	17395079	1.375	0.00192	Cytoplasm	other
AOPEP	aminopeptidase O (putative)	17288105	-1.066	0.0199	Cytoplasm	peptidase
CASP3	caspase 3	17501041	0.637	0.0126	Cytoplasm	peptidase	diagnosis,disease progression,efficacy,unspecified application	caspase 3 inhibitor
CNDP2	carnosine dipeptidase 2	17355825	1.045	0.000105	Cytoplasm	peptidase
CSTB	cystatin B	17234803	1.52	0.000264	Cytoplasm	peptidase	diagnosis
CTSA	cathepsin A	17379560	0.882	0.012	Cytoplasm	peptidase
CTSB	cathepsin B	17301213	1.358	0.00318	Cytoplasm	peptidase
CTSD	cathepsin D	17498099	1.342	2.72e-05	Cytoplasm	peptidase	diagnosis,unspecified application
CTSE	cathepsin E	17217035	0.67	0.0323	Cytoplasm	peptidase	prognosis
CTSH	cathepsin H	17520233	0.816	0.0398	Cytoplasm	peptidase
CTSK	cathepsin K	17400365	1.985	4.86e-05	Cytoplasm	peptidase	efficacy	balicatib,cathepsin K inhibitor,odanacatib
CTSS	cathepsin S	17400375	1.674	6.08e-05	Cytoplasm	peptidase
CTSV	cathepsin V	17293706	1.417	6.85e-05	Cytoplasm	peptidase
CTSZ	cathepsin Z	17395155	1.191	0.000143	Cytoplasm	peptidase
DPP7	dipeptidyl peptidase 7	17382533	0.686	0.00818	Cytoplasm	peptidase
LGMN	legumain	17283445	1.883	5.34e-05	Cytoplasm	peptidase
MALT1	MALT1 paracaspase	17351330	0.66	0.0136	Cytoplasm	peptidase	unspecified application	JNJ-67856633
MMP27	matrix metallopeptidase 27	17514566	0.613	0.0302	Cytoplasm	peptidase		marimastat
PSMB5	proteasome 20S subunit beta 5	17306417	0.772	0.00755	Cytoplasm	peptidase		bortezomib,bortezomib/cladribine/rituximab,bortezomib/dexamethasone,bortezomib/dexamethasone/doxorubicin,bortezomib/dexamethasone/lenalidomide,bortezomib/dexamethasone/pomalidomide,bortezomib/dexamethasone/rituximab,bortezomib/dexamethasone/thalidomide,bortezomib/doxorubicin,bortezomib/fulvestrant,bortezomib/lenalidomide,bortezomib/paclitaxel,bortezomib/prednisone,bortezomib/rituximab,bortezomib/…
RAB7B	RAB7B, member RAS oncogene family	17217048	1.304	0.000398	Cytoplasm	peptidase
UCHL1	ubiquitin C-terminal hydrolase L1	17437876	0.745	0.00255	Cytoplasm	peptidase	diagnosis,prognosis
ACP2	acid phosphatase 2, lysosomal	17373222	0.961	0.0287	Cytoplasm	phosphatase
Acp5	acid phosphatase 5, tartrate resistant	17524930	1.403	0.000289	Cytoplasm	phosphatase
CDKN3	cyclin dependent kinase inhibitor 3	17299268	1.058	0.0162	Cytoplasm	phosphatase
INPP5D	inositol polyphosphate-5-phosphatase D	17215309	0.544	0.0116	Cytoplasm	phosphatase		rosiptor
PPM1L	protein phosphatase, Mg2+/Mn2+ dependent 1L	17398274	-0.604	0.00593	Cytoplasm	phosphatase
PPP1R13B	protein phosphatase 1 regulatory subunit 13B	17284147	-0.598	0.0301	Cytoplasm	phosphatase
PPP1R14A	protein phosphatase 1 regulatory inhibitor subunit 14A	17476119	-0.717	0.00252	Cytoplasm	phosphatase
PPP1R14B	protein phosphatase 1 regulatory inhibitor subunit 14B	17356987	0.802	0.0429	Cytoplasm	phosphatase
PTPN6	protein tyrosine phosphatase non-receptor type 6	17470796	0.57	0.025	Cytoplasm	phosphatase		SC-43
SOCS3	suppressor of cytokine signaling 3	17272619	1.063	0.000131	Cytoplasm	phosphatase	diagnosis,efficacy
BCL10	BCL10 immune signaling adaptor	17403451	0.533	0.0494	Cytoplasm	transcription regulator
CDKN2D	cyclin dependent kinase inhibitor 2D	17524698	0.586	0.0102	Cytoplasm	transcription regulator
CYS1	cystin 1	17280296	-0.703	0.00662	Cytoplasm	transcription regulator
LPXN	leupaxin	17357872	0.992	0.00144	Cytoplasm	transcription regulator
NOSTRIN	nitric oxide synthase trafficking	17371390	-0.671	0.0232	Cytoplasm	transcription regulator
PSMD10	proteasome 26S subunit, non-ATPase 10	17544960	0.783	0.00569	Cytoplasm	transcription regulator
RBPMS	RNA binding protein, mRNA processing factor	17508691	-0.538	0.00807	Cytoplasm	transcription regulator
SEPTIN10	septin 10	17240989	0.616	0.0102	Cytoplasm	transcription regulator
TTF2	transcription termination factor 2	17408444	0.537	0.0137	Cytoplasm	transcription regulator
EEF1E1	eukaryotic translation elongation factor 1 epsilon 1	17291964	0.98	0.0373	Cytoplasm	translation regulator
EIF5A2	eukaryotic translation initiation factor 5A2	17396492	0.701	0.0337	Cytoplasm	translation regulator
RPL10	ribosomal protein L10	17535774	1.418	0.0193	Cytoplasm	translation regulator
RPS27L	ribosomal protein S27 like	17518799	0.882	0.00709	Cytoplasm	translation regulator
RPSA	ribosomal protein SA	17411141	0.834	0.00832	Cytoplasm	translation regulator
TSPO	translocator protein	17313654	0.854	0.0101	Cytoplasm	transmembrane receptor		alprazolam,CGS-8216,chlordiazepoxide,clonazepam,clorazepate,dexamethasone/olanzapine,diazepinomicin,estazolam,eszopiclone,flumazenil,flunitrazepam,fluoxetine/olanzapine,flurazepam,lorazepam,midazolam,olanzapine,PK 11195,SSR180575,temazepam,triazolam,zaleplon,zolpidem
AP1S1	adaptor related protein complex 1 subunit sigma 1	17453809	0.684	0.038	Cytoplasm	transporter
AP2S1	adaptor related protein complex 2 subunit sigma 1	17474136	0.575	0.028	Cytoplasm	transporter
ATOX1	antioxidant 1 copper chaperone	17263004	0.805	0.0122	Cytoplasm	transporter
ATP2A3	ATPase sarcoplasmic/endoplasmic reticulum Ca2+ transporting 3	17252497	-0.713	0.0101	Cytoplasm	transporter
ATP6V0D2	ATPase H+ transporting V0 subunit d2	17423577	1.744	0.00552	Cytoplasm	transporter
ATP6V1B1	ATPase H+ transporting V1 subunit B1	17460107	-0.629	0.045	Cytoplasm	transporter
ATP6V1C1	ATPase H+ transporting V1 subunit C1	17311157	0.699	0.0462	Cytoplasm	transporter
ATP6V1C2	ATPase H+ transporting V1 subunit C2	17280148	-0.874	0.00105	Cytoplasm	transporter
ATP6V1E1	ATPase H+ transporting V1 subunit E1	17470445	0.578	0.0467	Cytoplasm	transporter
BAX	BCL2 associated X, apoptosis regulator	17490839	0.638	0.00314	Cytoplasm	transporter	efficacy,prognosis,unspecified application
FABP5	fatty acid binding protein 5	17548238	1.751	0.00355	Cytoplasm	transporter	disease progression
MB	myoglobin	17318741	-0.98	0.0173	Cytoplasm	transporter	diagnosis,safety,unspecified application
PCLO	piccolo presynaptic cytomatrix protein	17434833	-0.921	0.00186	Cytoplasm	transporter
Pitpnc1	phosphatidylinositol transfer protein, cytoplasmic 1	17271118	-0.555	0.0481	Cytoplasm	transporter
RACGAP1	Rac GTPase activating protein 1	17321597	1.028	0.00487	Cytoplasm	transporter	unspecified application
S100A6	S100 calcium binding protein A6	17399812	1.199	0.00198	Cytoplasm	transporter	diagnosis,unspecified application
SLC15A3	solute carrier family 15 member 3	17357597	1.194	0.000121	Cytoplasm	transporter
SLC25A42	solute carrier family 25 member 42	17509976	-0.565	0.0451	Cytoplasm	transporter
SLC37A2	solute carrier family 37 member 2	17525578	1.085	0.000121	Cytoplasm	transporter
SLC5A12	solute carrier family 5 member 12	17374137	-1.285	0.00568	Cytoplasm	transporter
SNX1	sorting nexin 1	17528329	0.637	0.0258	Cytoplasm	transporter
SNX5	sorting nexin 5	17392375	0.759	0.00328	Cytoplasm	transporter
SNX10	sorting nexin 10	17458573	0.74	0.00684	Cytoplasm	transporter
SYT11	synaptotagmin 11	17406831	0.51	0.0112	Cytoplasm	transporter
TNNI3	troponin I3, cardiac type	17485789	-0.774	0.0445	Cytoplasm	transporter	diagnosis,efficacy,safety,unspecified application
TOMM20	translocase of outer mitochondrial membrane 20	17514247	0.583	0.0416	Cytoplasm	transporter

## Sheet: Transc_reg
Symbol	Entrez Gene Name	Affymetrix/Gene Symbol - mouse (Entrez Gene)	Expr Log Ratio	Expr p-value	Location	Type(s)
IFI16	interferon gamma inducible protein 16	17230045	2.679	0.000868	Nucleus	transcription regulator
IRF7	interferon regulatory factor 7	17497813	1.556	3.12e-05	Nucleus	transcription regulator
TFEC	transcription factor EC	17464950	1.466	0.00131	Nucleus	transcription regulator
MAFB	MAF bZIP transcription factor B	17393868	1.394	0.000236	Nucleus	transcription regulator
FHL5	four and a half LIM domains 5	17423665	1.377	0.0062	Nucleus	transcription regulator
ZNF705A	zinc finger protein 705A	17462729	1.213	0.00661	Nucleus	transcription regulator
DEPDC1	DEP domain containing 1	17403919	1.103	0.0064	Nucleus	transcription regulator
H2AX	H2A.X variant histone	17516558	1.073	0.0454	Nucleus	transcription regulator
ZNF616	zinc finger protein 616	17421476	1.028	0.00339	Nucleus	transcription regulator
HIF1A	hypoxia inducible factor 1 subunit alpha	17276328	0.989	0.00843	Nucleus	transcription regulator
E2F8	E2F transcription factor 8	17491378	0.954	0.0243	Nucleus	transcription regulator
VAV1	vav guanine nucleotide exchange factor 1	17338982	0.95	0.0027	Nucleus	transcription regulator
CHURC1	churchill domain containing 1	17276614	0.941	0.0191	Nucleus	transcription regulator
MYC	MYC proto-oncogene, bHLH transcription factor	17311846	0.936	6.85e-05	Nucleus	transcription regulator
FOSL1	FOS like 1, AP-1 transcription factor subunit	17356427	0.932	0.00489	Nucleus	transcription regulator
EGR2	early growth response 2	17233993	0.927	0.000264	Nucleus	transcription regulator
ATF3	activating transcription factor 3	17231033	0.918	0.000131	Nucleus	transcription regulator
JUNB	JunB proto-oncogene, AP-1 transcription factor subunit	17511259	0.856	0.00348	Nucleus	transcription regulator
LITAF	lipopolysaccharide induced TNF factor	17328124	0.784	6.22e-05	Nucleus	transcription regulator
SPI1	Spi-1 proto-oncogene	17373177	0.767	0.00612	Nucleus	transcription regulator
PCBD1	pterin-4 alpha-carbinolamine dehydratase 1	17233669	0.738	0.0497	Nucleus	transcription regulator
BHLHE40	basic helix-loop-helix family member e40	17461414	0.731	0.0123	Nucleus	transcription regulator
NOCT	nocturnin	17397426	0.703	0.000572	Nucleus	transcription regulator
BATF3	basic leucine zipper ATF-like transcription factor 3	17220787	0.677	0.0375	Nucleus	transcription regulator
MITF	melanocyte inducing transcription factor	17461132	0.673	0.00467	Nucleus	transcription regulator
CCND1	cyclin D1	17498502	0.663	0.0422	Nucleus	transcription regulator
TCF19	transcription factor 19	17344336	0.653	0.0178	Nucleus	transcription regulator
HTATIP2	HIV-1 Tat interactive protein 2	17478352	0.642	0.0123	Nucleus	transcription regulator
NFKBIE	NFKB inhibitor epsilon	17337927	0.637	0.0473	Nucleus	transcription regulator
BASP1	brain abundant membrane attached signal protein 1	17316175	0.625	0.00222	Nucleus	transcription regulator
TFDP1	transcription factor Dp-1	17499310	0.612	0.0294	Nucleus	transcription regulator
TRPS1	transcriptional repressor GATA binding 1	17316977	0.605	0.0478	Nucleus	transcription regulator
IRF8	interferon regulatory factor 8	17506279	0.558	0.0222	Nucleus	transcription regulator
RBL1	RB transcriptional corepressor like 1	17393684	0.552	0.0385	Nucleus	transcription regulator
SAP30	Sin3A associated protein 30	17509455	0.548	0.027	Nucleus	transcription regulator
NCOA4	nuclear receptor coactivator 4	17298510	0.545	0.0477	Nucleus	transcription regulator
HES6	hes family bHLH transcription factor 6	17225499	0.519	0.0132	Nucleus	transcription regulator
FOXR2	forkhead box R2	17538978	-0.527	0.025	Nucleus	transcription regulator
KLF7	Kruppel like factor 7	17223766	-0.531	0.0451	Nucleus	transcription regulator
PHF1	PHD finger protein 1	17335000	-0.547	0.0275	Nucleus	transcription regulator
HMBOX1	homeobox containing 1	17307709	-0.549	0.0137	Nucleus	transcription regulator
SPEN	spen family transcriptional repressor	17432202	-0.55	0.0388	Nucleus	transcription regulator
FOXJ2	forkhead box J2	17462705	-0.555	0.0345	Nucleus	transcription regulator
ATF7IP	activating transcription factor 7 interacting protein	17463829	-0.561	0.0206	Nucleus	transcription regulator
SOX13	SRY-box transcription factor 13	17226974	-0.587	0.00542	Nucleus	transcription regulator
MECOM	MDS1 and EVI1 complex locus	17404503	-0.588	0.0419	Nucleus	transcription regulator
HDAC5	histone deacetylase 5	17270082	-0.602	0.0055	Nucleus	transcription regulator
ZFHX3	zinc finger homeobox 3	17505313	-0.619	0.0439	Nucleus	transcription regulator
EPAS1	endothelial PAS domain protein 1	17340197	-0.632	0.00535	Nucleus	transcription regulator
NFIX	nuclear factor I X	17511142	-0.635	0.045	Nucleus	transcription regulator
HOXB4	homeobox B4	17255594	-0.655	0.0158	Nucleus	transcription regulator
PLAGL1	PLAG1 like zinc finger 1	17231694	-0.655	0.00728	Nucleus	transcription regulator
TBX2	T-box transcription factor 2	17254591	-0.688	0.00529	Nucleus	transcription regulator
RUNX1T1	RUNX1 partner transcriptional co-repressor 1	17411918	-0.697	0.0231	Nucleus	transcription regulator
NFIA	nuclear factor I A	17415606	-0.708	0.00658	Nucleus	transcription regulator
MYB	MYB proto-oncogene, transcription factor	17239664	-0.71	0.0148	Nucleus	transcription regulator
ASCL1	achaete-scute family bHLH transcription factor 1	17243839	-0.723	0.0172	Nucleus	transcription regulator
ZNF319	zinc finger protein 319	17511992	-0.723	0.0132	Nucleus	transcription regulator
ZBTB4	zinc finger and BTB domain containing 4	17251728	-0.725	0.00214	Nucleus	transcription regulator
GATA2	GATA binding protein 2	17460634	-0.733	0.0272	Nucleus	transcription regulator
TEF	TEF transcription factor, PAR bZIP family member	17313376	-0.742	0.0223	Nucleus	transcription regulator
SIX5	SIX homeobox 5	17474480	-0.752	0.00208	Nucleus	transcription regulator
DACH1	dachshund family transcription factor 1	17309041	-0.758	0.00828	Nucleus	transcription regulator
PRDM6	PR/SET domain 6	17350639	-0.76	0.00811	Nucleus	transcription regulator
TLE2	TLE family member 2, transcriptional corepressor	17235757	-0.772	0.00949	Nucleus	transcription regulator
IRX2	iroquois homeobox 2	17288442	-0.775	0.00211	Nucleus	transcription regulator
SOX11	SRY-box transcription factor 11	17280350	-0.775	0.0158	Nucleus	transcription regulator
SMARCA2	SWI/SNF related, matrix associated, actin dependent regulator of chromatin, subfamily a, member 2	17358375	-0.796	0.0114	Nucleus	transcription regulator
MLIP	muscular LMNA interacting protein	17528947	-0.801	0.0142	Nucleus	transcription regulator
CALCOCO1	calcium binding and coiled-coil domain 1	17322289	-0.817	0.00637	Nucleus	transcription regulator
ATF7	activating transcription factor 7	17322261	-0.818	0.0101	Nucleus	transcription regulator
SMAD6	SMAD family member 6	17528125	-0.832	0.0342	Nucleus	transcription regulator
EBF1	EBF transcription factor 1	17248691	-0.841	0.0269	Nucleus	transcription regulator
FOXA1	forkhead box A1	17281337	-0.86	0.0102	Nucleus	transcription regulator
Meis1	Meis homeobox 1	17260815	-0.863	0.000267	Nucleus	transcription regulator
MAML3	mastermind like transcriptional coactivator 3	17405154	-0.904	0.00595	Nucleus	transcription regulator
FOXF1	forkhead box F1	17506291	-0.948	0.00519	Nucleus	transcription regulator
KLF2	Kruppel like factor 2	17502440	-0.989	0.0328	Nucleus	transcription regulator
AFF3	AF4/FMR2 family member 3	17222465	-0.995	0.0018	Nucleus	transcription regulator
KLF15	Kruppel like factor 15	17460826	-1.036	0.0153	Nucleus	transcription regulator
ZBTB20	zinc finger and BTB domain containing 20	17325723	-1.047	0.0204	Nucleus	transcription regulator
TBX3	T-box transcription factor 3	17441595	-1.053	0.000159	Nucleus	transcription regulator
PRDM8	PR/SET domain 8	17439511	-1.148	0.00426	Nucleus	transcription regulator
KLF12	Kruppel like factor 12	17309099	-1.307	0.00242	Nucleus	transcription regulator
