# Supplementary material for: Transcriptomic profile of the mice aging lung is associated with inflammation and apoptosis as important pathways
Source: Aging (Albany NY). 2021 May 12;13(9):12378–94. doi: 10.18632/aging.203039 (PMC8148450; doi:10.18632/aging.203039)
Supplement: Supplementary Table 6 [file aging-13-203039-s007.xlsx]

## Sheet: Supplementary_Table_6
Supplementary Table 6. miRNA-target gene regulatory network.
ID	Accession	Target	TargetID	Experiment	Literature	Tissue
mmu-mir-692	MIMAT0003471	Mmp14	17387	HITS-CLIP	23597149	Unspecified
mmu-mir-1192	MIMAT0005850	Gpr12	14738	HITS-CLIP	25083871	Unspecified
mmu-mir-1192	MIMAT0005850	Chml	12663	HITS-CLIP	25083871	Unspecified
mmu-mir-200b-3p	MIMAT0000233	Pkib	18768	HITS-CLIP	25083871	Unspecified
mmu-mir-692	MIMAT0003471	Pou4f1	18996	HITS-CLIP	21258322	Unspecified
mmu-mir-5113	MIMAT0020621	Gng2	14702	HITS-CLIP	21258322	Unspecified
mmu-mir-181b-5p	MIMAT0000673	SIX2	20472	Luciferase assay//qRT-PCR//Western blot	24055707	Unspecified
mmu-mir-5113	MIMAT0020621	Cdk7	12572	HITS-CLIP	21258322	Unspecified
mmu-mir-1192	MIMAT0005850	Cdk7	12572	HITS-CLIP	25083871	Unspecified
mmu-mir-1192	MIMAT0005850	Cdk7	12572	HITS-CLIP	21258322	Unspecified
mmu-mir-1192	MIMAT0005850	Scn7a	20272	HITS-CLIP	21258322	Unspecified
mmu-mir-1192	MIMAT0005850	Syn2	20965	HITS-CLIP	25083871	Unspecified
mmu-mir-181b-5p	MIMAT0000673	Uchl1	22223	Luciferase assay//qRT-PCR//Western blot	23900885	Unspecified
mmu-mir-692	MIMAT0003471	Arhgef2	16800	HITS-CLIP	23597149	Unspecified
mmu-mir-692	MIMAT0003471	Arhgef2	16800	HITS-CLIP	21258322	Unspecified
mmu-mir-297a-5p	MIMAT0000375	Ptprk	19272	HITS-CLIP	25083871	Unspecified
mmu-mir-1192	MIMAT0005850	Ccl9	20308	HITS-CLIP	21258322	Unspecified
mmu-mir-674-5p	MIMAT0003740	Il15ra	16169	HITS-CLIP	25083871	Unspecified
mmu-mir-297a-5p	MIMAT0000375	Fbrs	14123	HITS-CLIP	23597149	Unspecified
mmu-mir-674-5p	MIMAT0003740	T2		HITS-CLIP	21258322	Unspecified
mmu-mir-29b-3p	MIMAT0000127	Col4a4	12829	Luciferase assay//qRT-PCR//Western blot	23139829	Unspecified
mmu-mir-29b-3p	MIMAT0000127	Col4a3	12828	Luciferase assay//qRT-PCR//Western blot	23139829	Unspecified
mmu-mir-297a-5p	MIMAT0000375	Ncan	13004	Sequencing	19536157	Unspecified
mmu-mir-674-5p	MIMAT0003740	Ubp1	22221	HITS-CLIP	23142080	Unspecified
mmu-mir-692	MIMAT0003471	Satb1	20230	HITS-CLIP	21258322	Unspecified
mmu-mir-1192	MIMAT0005850	Satb1	20230	HITS-CLIP	21258322	Unspecified
mmu-mir-3076-3p	MIMAT0014861	Gucy2f	245650	HITS-CLIP	21258322	Unspecified
mmu-mir-1192	MIMAT0005850	Gucy2f	245650	HITS-CLIP	21258322	Unspecified
mmu-mir-692	MIMAT0003471	Rad23a	19358	HITS-CLIP	25083871	Unspecified
mmu-mir-674-5p	MIMAT0003740	Cxcr2	12765	HITS-CLIP	21258322	Unspecified
mmu-mir-297a-5p	MIMAT0000375	Il18r1	16182	HITS-CLIP	23597149	Unspecified
mmu-mir-297a-5p	MIMAT0000375	Six4	20474	HITS-CLIP	23597149	Unspecified
mmu-mir-297a-5p	MIMAT0000375	Six4	20474	HITS-CLIP	25083871	Unspecified
mmu-mir-664-3p	MIMAT0012774	Prl5a1	28078	HITS-CLIP	25083871	Unspecified
mmu-mir-692	MIMAT0003471	Sco1	52892	HITS-CLIP	23142080	Unspecified
mmu-mir-297a-5p	MIMAT0000375	D4Wsu53e	27981	Sequencing	19536157	Unspecified
mmu-mir-1192	MIMAT0005850	Ppih	66101	HITS-CLIP	21258322	Unspecified
mmu-mir-692	MIMAT0003471	D3Bwg0562e	229791	HITS-CLIP	23597149	Unspecified
mmu-mir-297a-5p	MIMAT0000375	Rfx3	19726	HITS-CLIP	23597149	Unspecified
mmu-mir-23b-3p	MIMAT0000125	Il17ra	16172	HITS-CLIP	25083871	Unspecified
mmu-mir-200b-3p	MIMAT0000233	Hist1h1d	14957	HITS-CLIP	21258322	Unspecified
mmu-mir-200b-3p	MIMAT0000233	Hist1h1d	14957	HITS-CLIP	23142080	Unspecified
mmu-mir-200b-3p	MIMAT0000233	Hist1h1d	14957	HITS-CLIP	25083871	Unspecified
mmu-mir-200b-3p	MIMAT0000233	Hist1h1d	14957	HITS-CLIP	23597149	Unspecified
mmu-mir-3076-5p	MIMAT0014860	Plxna1	18844	HITS-CLIP	25083871	Unspecified
mmu-mir-692	MIMAT0003471	Zfp71-rs1	235907	HITS-CLIP	21258322	Unspecified
mmu-mir-5113	MIMAT0020621	Tfam	21780	HITS-CLIP	23142080	Unspecified
mmu-mir-1192	MIMAT0005850	Tfam	21780	HITS-CLIP	21258322	Unspecified
mmu-mir-297a-5p	MIMAT0000375	Has2	15117	HITS-CLIP	23597149	Unspecified
mmu-let-7c-5p	MIMAT0000523	EZH2	14056	Luciferase assay//qRT-PCR//Western blot	24365598	Unspecified
mmu-mir-103-3p	MIMAT0000546	Klc1	16593	HITS-CLIP	21258322	Unspecified
mmu-mir-103-3p	MIMAT0000546	Klc1	16593	HITS-CLIP	23597149	Unspecified
mmu-mir-692	MIMAT0003471	Frrs1	20321	HITS-CLIP	23597149	Unspecified
mmu-mir-297a-5p	MIMAT0000375	Zfp92	22754	HITS-CLIP	21258322	Unspecified
mmu-mir-1192	MIMAT0005850	Zfp92	22754	HITS-CLIP	25083871	Unspecified
mmu-mir-692	MIMAT0003471	Alx4	11695	HITS-CLIP	21258322	Unspecified
mmu-let-7c-5p	MIMAT0000523	Meis2	17536	HITS-CLIP	23142080	Unspecified
mmu-let-7b-5p	MIMAT0000522	Meis2	17536	HITS-CLIP	23142080	Unspecified
mmu-mir-1192	MIMAT0005850	Ogn	18295	HITS-CLIP	23142080	Unspecified
mmu-mir-1192	MIMAT0005850	E4f1	13560	HITS-CLIP	25083871	Unspecified
mmu-let-7c-5p	MIMAT0000523	Nup214	227720	HITS-CLIP	21258322	Unspecified
mmu-let-7b-5p	MIMAT0000522	Nup214	227720	HITS-CLIP	21258322	Unspecified
mmu-mir-692	MIMAT0003471	Terf1	21749	HITS-CLIP	25083871	Unspecified
mmu-mir-1192	MIMAT0005850	Cirh1a	21771	HITS-CLIP	25083871	Unspecified
mmu-mir-674-5p	MIMAT0003740	Rbm34	52202	HITS-CLIP	21258322	Unspecified
mmu-mir-1192	MIMAT0005850	Rbm34	52202	HITS-CLIP	21258322	Unspecified
mmu-mir-1192	MIMAT0005850	Sgol2	68549	HITS-CLIP	21258322	Unspecified
mmu-mir-1192	MIMAT0005850	D3Ertd254e	241944	HITS-CLIP	25083871	Unspecified
mmu-mir-674-5p	MIMAT0003740	D3Ertd254e	241944	HITS-CLIP	21258322	Unspecified
mmu-mir-23b-3p	MIMAT0000125	Fam126b	213056	HITS-CLIP	23142080	Unspecified
mmu-mir-1192	MIMAT0005850	Fam126b	213056	HITS-CLIP	21258322	Unspecified
mmu-mir-29c-3p	MIMAT0000536	Fam126b	213056	HITS-CLIP	21258322	Unspecified
mmu-mir-29b-3p	MIMAT0000127	Fam126b	213056	HITS-CLIP	21258322	Unspecified
mmu-mir-674-5p	MIMAT0003740	Rbbp4	19646	HITS-CLIP	21258322	Unspecified
mmu-mir-5113	MIMAT0020621	Rdh1	107605	HITS-CLIP	25083871	Unspecified
mmu-mir-3076-3p	MIMAT0014861	Rdh1	107605	HITS-CLIP	23142080	Unspecified
mmu-mir-297a-5p	MIMAT0000375	Tsc22d3	14605	HITS-CLIP	25083871	Unspecified
mmu-mir-297a-5p	MIMAT0000375	Ccpg1	72278	HITS-CLIP	25083871	Unspecified
mmu-mir-692	MIMAT0003471	Dsg2	13511	HITS-CLIP	21258322	Unspecified
mmu-mir-692	MIMAT0003471	Dsg2	13511	HITS-CLIP	19536157	Unspecified
mmu-mir-692	MIMAT0003471	Dsg2	13511	HITS-CLIP	25083871	Unspecified
mmu-mir-692	MIMAT0003471	Dsg2	13511	HITS-CLIP	23597149	Unspecified
mmu-mir-1192	MIMAT0005850	Srpk2	20817	HITS-CLIP	25083871	Unspecified
mmu-mir-29b-3p	MIMAT0000127	Eomes	13813	Luciferase assay//Microarray//qRT-PCR	21820330	Unspecified
mmu-mir-5113	MIMAT0020621	Ctbp2	13017	HITS-CLIP	25083871	Unspecified
mmu-mir-5113	MIMAT0020621	Ctbp2	13017	HITS-CLIP	23142080	Unspecified
mmu-mir-297a-5p	MIMAT0000375	Casp8	12370	HITS-CLIP	23597149	Unspecified
mmu-mir-297a-5p	MIMAT0000375	Casp8	12370	HITS-CLIP	25083871	Unspecified
mmu-mir-181b-5p	MIMAT0000673	Rad51d	19364	HITS-CLIP	25083871	Unspecified
mmu-let-7b-5p	MIMAT0000522	Cnih	12793	Sequencing	19536157	Unspecified
mmu-mir-674-5p	MIMAT0003740	Sap18	20220	HITS-CLIP	21258322	Unspecified
mmu-mir-1192	MIMAT0005850	Tmem41b	233724	HITS-CLIP	23142080	Unspecified
mmu-mir-3076-3p	MIMAT0014861	Slc52a2	52710	HITS-CLIP	21258322	Unspecified
mmu-mir-5113	MIMAT0020621	Slc52a2	52717	HITS-CLIP	21258322	Unspecified
mmu-mir-674-5p	MIMAT0003740	Naip5	17951	HITS-CLIP	21258322	Unspecified
mmu-mir-674-5p	MIMAT0003740	Cenpf	13421	HITS-CLIP	21258322	Unspecified
mmu-mir-705	MIMAT0003495	Tnfrsf11a	21934	HITS-CLIP	21258322	Unspecified
mmu-mir-692	MIMAT0003471	Lhx9	16876	HITS-CLIP	21258322	Unspecified
mmu-mir-692	MIMAT0003471	Lhx9	16876	HITS-CLIP	25083871	Unspecified
mmu-mir-692	MIMAT0003471	Lhx9	16876	HITS-CLIP	23597149	Unspecified
mmu-mir-692	MIMAT0003471	Lhx9	12155	HITS-CLIP	19536157	Unspecified
mmu-mir-674-5p	MIMAT0003740	Slfn5	327978	HITS-CLIP	23597149	Unspecified
mmu-mir-674-5p	MIMAT0003740	Slfn5	18020	HITS-CLIP	21258322	Unspecified
mmu-mir-297a-5p	MIMAT0000375	Nrf1	18181	HITS-CLIP	25083871	Unspecified
mmu-mir-664-3p	MIMAT0012774	Aqp3	11828	HITS-CLIP	21258322	Unspecified
mmu-mir-664-3p	MIMAT0012774	Aqp3	11828	HITS-CLIP	23597149	Unspecified
mmu-mir-181b-5p	MIMAT0000673	Aqp3	11828	HITS-CLIP	23597149	Unspecified
mmu-mir-181b-5p	MIMAT0000673	Aqp3	11828	HITS-CLIP	21258322	Unspecified
mmu-mir-674-5p	MIMAT0003740	Cx3cr1	13051	HITS-CLIP	21258322	Unspecified
mmu-mir-23b-3p	MIMAT0000125	Magea5	17141	HITS-CLIP	25083871	Unspecified
mmu-mir-181b-5p	MIMAT0000673	Magea5	17141	HITS-CLIP	25083871	Unspecified
mmu-mir-23b-3p	MIMAT0000125	Mbd4	17193	HITS-CLIP	21258322	Unspecified
mmu-mir-133a-3p	MIMAT0000145	Kcnmb1	19201	Immunohistochemistry//In situ hybridization//Luciferase assay//Microarray//qRT-PCR//Western blot	24068960	Unspecified
mmu-mir-297a-5p	MIMAT0000375	Pstpip2	19201	HITS-CLIP	21258322	Unspecified
mmu-mir-200b-3p	MIMAT0000233	Cradd	108079	HITS-CLIP	25083871	Unspecified
mmu-mir-297a-5p	MIMAT0000375	Slc22a8	19879	HITS-CLIP	19536157	Unspecified
mmu-mir-297a-5p	MIMAT0000375	Slc22a8	19879	HITS-CLIP	23597149	Unspecified
mmu-mir-297a-5p	MIMAT0000375	Slc22a8	19879	HITS-CLIP	25083871	Unspecified
mmu-mir-297a-5p	MIMAT0000375	Slc22a8	19879	HITS-CLIP	21258322	Unspecified
mmu-mir-674-5p	MIMAT0003740	Ankfy1	11736	HITS-CLIP	21258322	Unspecified
mmu-let-7b-5p	MIMAT0000522	ACVR1B	13610	Luciferase assay//qRT-PCR//Western blot	23152446	Unspecified
mmu-mir-692	MIMAT0003471	Sema3e	20349	HITS-CLIP	21258322	Unspecified
mmu-mir-3076-5p	MIMAT0014860	Tnfrsf10b	21933	HITS-CLIP	25083871	Unspecified
mmu-mir-3076-5p	MIMAT0014860	Lgr5	14160	HITS-CLIP	21258322	Unspecified
mmu-mir-674-5p	MIMAT0003740	Ccr9	12769	HITS-CLIP	21258322	Unspecified
mmu-mir-674-5p	MIMAT0003740	Slc23a1	20522	HITS-CLIP	21258322	Unspecified
mmu-mir-674-5p	MIMAT0003740	Slc23a1	20522	HITS-CLIP	23597149	Unspecified
mmu-mir-181b-5p	MIMAT0000673	Ikzf2	22779	HITS-CLIP	21258322	Unspecified
mmu-mir-181b-5p	MIMAT0000673	Ikzf2	22779	HITS-CLIP	25083871	Unspecified
mmu-mir-5113	MIMAT0020621	Synj2bp	24071	HITS-CLIP	23597149	Unspecified
mmu-mir-5113	MIMAT0020621	Synj2bp	24071	HITS-CLIP	21258322	Unspecified
mmu-mir-5113	MIMAT0020621	Synj2bp	24071	HITS-CLIP	25083871	Unspecified
mmu-mir-692	MIMAT0003471	Slc35a1	24060	HITS-CLIP	21258322	Unspecified
mmu-mir-692	MIMAT0003471	Slc35a1	24060	HITS-CLIP	25083871	Unspecified
mmu-mir-692	MIMAT0003471	Slc35a1	24060	HITS-CLIP	23597149	Unspecified
mmu-mir-692	MIMAT0003471	Slco2a1	24086	HITS-CLIP	21258322	Unspecified
mmu-mir-1192	MIMAT0005850	Tlk2	23988	HITS-CLIP	25083871	Unspecified
mmu-mir-297a-5p	MIMAT0000375	Aplnr	23796	HITS-CLIP	25083871	Unspecified
mmu-mir-568	MIMAT0004892	Rbbp9	26450	HITS-CLIP	25083871	Unspecified
mmu-mir-692	MIMAT0003471	Clec4a2	26888	HITS-CLIP	21258322	Unspecified
mmu-mir-692	MIMAT0003471	Clec4a2	26888	HITS-CLIP	23597149	Unspecified
mmu-mir-692	MIMAT0003471	Ermap	27028	HITS-CLIP	23142080	Unspecified
mmu-mir-692	MIMAT0003471	Ermap	27050	HITS-CLIP	19536157	Unspecified
mmu-mir-297a-5p	MIMAT0000375	Slamf1	27226	HITS-CLIP	23142080	Unspecified
mmu-mir-5113	MIMAT0020621	Mrpl17	27397	HITS-CLIP	21258322	Unspecified
mmu-mir-3076-5p	MIMAT0014860	Npas3	27366	HITS-CLIP	23142080	Unspecified
mmu-mir-3076-5p	MIMAT0014860	Pdxk	216134	HITS-CLIP	25083871	Unspecified
mmu-mir-692	MIMAT0003471	Cabp5	29865	HITS-CLIP	21258322	Unspecified
mmu-mir-692	MIMAT0003471	Cabp5	29865	HITS-CLIP	23597149	Unspecified
mmu-mir-692	MIMAT0003471	Clic4	30049	HITS-CLIP	21258322	Unspecified
mmu-mir-674-5p	MIMAT0003740	Scd3	30049	HITS-CLIP	21258322	Unspecified
mmu-mir-3076-3p	MIMAT0014861	Lmo7	30942	HITS-CLIP	21258322	Unspecified
mmu-mir-674-5p	MIMAT0003740	Lcmt2	329504	HITS-CLIP	21258322	Unspecified
mmu-mir-1192	MIMAT0005850	Sirt6	50505	HITS-CLIP	25083871	Unspecified
mmu-mir-23b-3p	MIMAT0000125	Nox4	50758	Immunohistochemistry//Luciferase assay//qRT-PCR//Western blot	23152062	Unspecified
mmu-mir-23b-3p	MIMAT0000125	Fbxl17	50758	HITS-CLIP	21258322	Unspecified
mmu-mir-23b-3p	MIMAT0000125	Fbxl17	50758	HITS-CLIP	23597149	Unspecified
mmu-mir-23b-3p	MIMAT0000125	Fbxl17	50758	HITS-CLIP	25083871	Unspecified
mmu-mir-674-5p	MIMAT0003740	Synrg	50766	HITS-CLIP	21258322	Unspecified
mmu-mir-3076-5p	MIMAT0014860	2009-09-01	53860	HITS-CLIP	25083871	Unspecified
mmu-mir-692	MIMAT0003471	Slc7a10	53896	HITS-CLIP	21258322	Unspecified
mmu-mir-692	MIMAT0003471	Slc7a10	51796	HITS-CLIP	23597149	Unspecified
mmu-mir-297a-5p	MIMAT0000375	Gpatch11	53951	HITS-CLIP	25083871	Unspecified
mmu-mir-297a-5p	MIMAT0000375	Egfl6	54156	HITS-CLIP	23597149	Unspecified
mmu-mir-29b-3p	MIMAT0000127	Hif3a	53417	HITS-CLIP	21258322	Unspecified
mmu-mir-29c-3p	MIMAT0000536	Hif3a	53417	HITS-CLIP	21258322	Unspecified
mmu-mir-29b-3p	MIMAT0000127	Hif3a	53417	HITS-CLIP	23597149	Unspecified
mmu-mir-29c-3p	MIMAT0000536	Hif3a	53417	HITS-CLIP	25083871	Unspecified
mmu-mir-29b-3p	MIMAT0000127	Hif3a	53417	HITS-CLIP	25083871	Unspecified
mmu-mir-29c-3p	MIMAT0000536	Hif3a	53417	HITS-CLIP	23597149	Unspecified
mmu-mir-1192	MIMAT0005850	Set	56086	HITS-CLIP	23142080	Unspecified
mmu-let-7c-5p	MIMAT0000523	Cts8	56094	HITS-CLIP	21258322	Unspecified
mmu-let-7b-5p	MIMAT0000522	Cts8	56094	HITS-CLIP	21258322	Unspecified
mmu-let-7b-5p	MIMAT0000522	Cts8	56094	HITS-CLIP	25083871	Unspecified
mmu-let-7c-5p	MIMAT0000523	Cts8	54609	HITS-CLIP	25083871	Unspecified
mmu-mir-1192	MIMAT0005850	Plek	56193	HITS-CLIP	21258322	Unspecified
mmu-mir-1192	MIMAT0005850	Slc15a1	56643	HITS-CLIP	25083871	Unspecified
mmu-mir-1192	MIMAT0005850	Slc15a1	56643	HITS-CLIP	21258322	Unspecified
mmu-mir-1192	MIMAT0005850	Gsk3b	56637	HITS-CLIP	25083871	Unspecified
mmu-mir-297a-5p	MIMAT0000375	Ccl28	56838	HITS-CLIP	25083871	Unspecified
mmu-mir-297a-5p	MIMAT0000375	Htr3b	57246	HITS-CLIP	25083871	Unspecified
mmu-mir-1192	MIMAT0005850	Extl1	57765	HITS-CLIP	25083871	Unspecified
mmu-mir-29b-3p	MIMAT0000127	Tbx21	57775	Luciferase assay//Microarray//qRT-PCR	21820330	Unspecified
mmu-mir-674-5p	MIMAT0003740	Banp	57781	HITS-CLIP	21258322	Unspecified
mmu-mir-1192	MIMAT0005850	Il17re	57890	HITS-CLIP	25083871	Unspecified
mmu-mir-297a-5p	MIMAT0000375	B3gnt2	53625	HITS-CLIP	25083871	Unspecified
mmu-mir-200b-3p	MIMAT0000233	Plxnc1	54712	HITS-CLIP	25083871	Unspecified
mmu-mir-692	MIMAT0003471	Il21	60505	HITS-CLIP	23597149	Unspecified
mmu-mir-692	MIMAT0003471	Il21	60505	HITS-CLIP	25083871	Unspecified
mmu-mir-297a-5p	MIMAT0000375	Il21	60504	HITS-CLIP	25083871	Unspecified
mmu-mir-692	MIMAT0003471	Dkk2	56811	HITS-CLIP	23597149	Unspecified
mmu-mir-692	MIMAT0003471	Dkk2	216984	HITS-CLIP	21258322	Unspecified
mmu-mir-1192	MIMAT0005850	Supt16	210009	HITS-CLIP	25083871	Unspecified
mmu-mir-692	MIMAT0003471	Styx	56291	HITS-CLIP	25083871	Unspecified
mmu-mir-3076-5p	MIMAT0014860	Ap1s3	252903	HITS-CLIP	21258322	Unspecified
mmu-mir-692	MIMAT0003471	Prkag3	241113	HITS-CLIP	21258322	Unspecified
mmu-mir-1192	MIMAT0005850	Bhmt2	80719	HITS-CLIP	25083871	Unspecified
mmu-mir-1192	MIMAT0005850	Onecut3	246086	HITS-CLIP	25083871	Unspecified
mmu-mir-297a-5p	MIMAT0000375	Brat1	231841	HITS-CLIP	21258322	Unspecified
mmu-mir-705	MIMAT0003495	Hdac7	56711	HITS-CLIP	25083871	Unspecified
mmu-let-7b-5p	MIMAT0000522	Acn9	66087	Sequencing	19536157	Unspecified
mmu-mir-674-5p	MIMAT0003740	Nip7	66164	HITS-CLIP	21258322	Unspecified
mmu-mir-674-5p	MIMAT0003740	Rpl7l1	66229	HITS-CLIP	25083871	Unspecified
mmu-mir-181b-5p	MIMAT0000673	Sc4mol	66254	Microarray	18762567	Unspecified
mmu-mir-297a-5p	MIMAT0000375	Sc4mol	66254	Sequencing	19536157	Unspecified
mmu-mir-692	MIMAT0003471	Fam134b	66296	HITS-CLIP	23142080	Unspecified
mmu-mir-674-5p	MIMAT0003740	Polr2l	66491	HITS-CLIP	21258322	Unspecified
mmu-mir-1192	MIMAT0005850	Pgpep1	66522	HITS-CLIP	25083871	Unspecified
mmu-mir-297a-5p	MIMAT0000375	Sike1	66641	HITS-CLIP	23597149	Unspecified
mmu-mir-297a-5p	MIMAT0000375	Sike1	66641	HITS-CLIP	25083871	Unspecified
mmu-mir-297a-5p	MIMAT0000375	Sike1	66648	HITS-CLIP	21258322	Unspecified
mmu-mir-181b-5p	MIMAT0000673	Nacc1	66849	HITS-CLIP	23142080	Unspecified
mmu-mir-5113	MIMAT0020621	Ppp1r2	66849	HITS-CLIP	21258322	Unspecified
mmu-mir-692	MIMAT0003471	Nhlrc2	66873	HITS-CLIP	25083871	Unspecified
mmu-mir-568	MIMAT0004892	Cir1	99311	HITS-CLIP	25083871	Unspecified
mmu-mir-674-5p	MIMAT0003740	Commd7	66950	HITS-CLIP	21258322	Unspecified
mmu-mir-29c-3p	MIMAT0000536	Cisd2	67006	HITS-CLIP	21258322	Unspecified
mmu-mir-29b-3p	MIMAT0000127	Cisd2	67006	HITS-CLIP	21258322	Unspecified
mmu-mir-29c-3p	MIMAT0000536	Cisd2	67006	HITS-CLIP	25083871	Unspecified
mmu-mir-29b-3p	MIMAT0000127	Cisd2	67008	HITS-CLIP	25083871	Unspecified
mmu-mir-1192	MIMAT0005850	Lrrc40	67144	HITS-CLIP	25083871	Unspecified
mmu-mir-297a-5p	MIMAT0000375	Lrrc40	67144	HITS-CLIP	25083871	Unspecified
mmu-mir-5113	MIMAT0020621	Wdr85	67228	HITS-CLIP	21258322	Unspecified
mmu-mir-674-5p	MIMAT0003740	Ppil4	67444	HITS-CLIP	21258322	Unspecified
mmu-mir-674-5p	MIMAT0003740	Spc24	67629	HITS-CLIP	21258322	Unspecified
mmu-mir-664-3p	MIMAT0012774	Rnmt	67939	HITS-CLIP	25083871	Unspecified
mmu-mir-297a-5p	MIMAT0000375	Ubxn2b	68053	HITS-CLIP	23142080	Unspecified
mmu-mir-674-5p	MIMAT0003740	Pbld1	244745	HITS-CLIP	21258322	Unspecified
mmu-mir-568	MIMAT0004892	Ndufaf4	68564	HITS-CLIP	25083871	Unspecified
mmu-mir-568	MIMAT0004892	Nufip2	68564	HITS-CLIP	25083871	Unspecified
mmu-mir-200b-3p	MIMAT0000233	Rnf166	68718	HITS-CLIP	25083871	Unspecified
mmu-mir-1192	MIMAT0005850	Arl8a	68724	HITS-CLIP	25083871	Unspecified
mmu-mir-103-3p	MIMAT0000546	Angel1	68760	HITS-CLIP	23597149	Unspecified
mmu-mir-297a-5p	MIMAT0000375	Lrrn4cl	68852	HITS-CLIP	23597149	Unspecified
mmu-mir-297a-5p	MIMAT0000375	Lrrn4cl	73137	HITS-CLIP	25083871	Unspecified
mmu-let-7b-5p	MIMAT0000522	Armc2	213402	HITS-CLIP	21258322	Unspecified
mmu-let-7c-5p	MIMAT0000523	Armc2	213402	HITS-CLIP	21258322	Unspecified
mmu-let-7b-5p	MIMAT0000522	Armc2	213402	HITS-CLIP	23597149	Unspecified
mmu-let-7c-5p	MIMAT0000523	Armc2	213402	HITS-CLIP	23597149	Unspecified
mmu-mir-1192	MIMAT0005850	Rhobtb1	69288	HITS-CLIP	25083871	Unspecified
mmu-mir-1192	MIMAT0005850	Glrx2	69367	HITS-CLIP	21258322	Unspecified
mmu-mir-664-3p	MIMAT0012774	Hopx	74318	HITS-CLIP	25083871	Unspecified
mmu-mir-674-5p	MIMAT0003740	Dph5	69740	HITS-CLIP	21258322	Unspecified
mmu-mir-674-5p	MIMAT0003740	Mfsd11	229279	HITS-CLIP	21258322	Unspecified
mmu-mir-1192	MIMAT0005850	Rnf168	70238	HITS-CLIP	25083871	Unspecified
mmu-mir-674-5p	MIMAT0003740	Arl16	70317	HITS-CLIP	21258322	Unspecified
mmu-mir-1192	MIMAT0005850	Calml3	228966	HITS-CLIP	25083871	Unspecified
mmu-mir-664-3p	MIMAT0012774	Ppp1r3d	70422	HITS-CLIP	25083871	Unspecified
mmu-mir-674-5p	MIMAT0003740	Tspan15	70428	HITS-CLIP	21258322	Unspecified
mmu-mir-1192	MIMAT0005850	Bbx	70511	HITS-CLIP	25083871	Unspecified
mmu-mir-1192	MIMAT0005850	Dcp2	70640	HITS-CLIP	25083871	Unspecified
mmu-mir-133a-3p	MIMAT0000145	Prdm16	70673	Luciferase assay//Microarray//qRT-PCR//Western blot	23143398	Unspecified
mmu-mir-1192	MIMAT0005850	Fam175a	70693	HITS-CLIP	25083871	Unspecified
mmu-mir-297a-5p	MIMAT0000375	Rpusd2	271842	HITS-CLIP	23597149	Unspecified
mmu-mir-1192	MIMAT0005850	Ttll7	70892	HITS-CLIP	25083871	Unspecified
mmu-mir-692	MIMAT0003471	Zfp689	71131	HITS-CLIP	25083871	Unspecified
mmu-mir-692	MIMAT0003471	Zfp689	71131	HITS-CLIP	21258322	Unspecified
mmu-mir-5113	MIMAT0020621	Zfp689	71131	HITS-CLIP	21258322	Unspecified
mmu-mir-181b-5p	MIMAT0000673	Zfp689	71131	HITS-CLIP	21258322	Unspecified
mmu-mir-103-3p	MIMAT0000546	Oxsm	71147	HITS-CLIP	21258322	Unspecified
mmu-mir-674-5p	MIMAT0003740	Zfp935	102640165	HITS-CLIP	21258322	Unspecified
mmu-mir-674-5p	MIMAT0003740	Zfp935	71508	HITS-CLIP	21258322	Unspecified
mmu-mir-297a-5p	MIMAT0000375	Ceacam20	382051	HITS-CLIP	23142080	Unspecified
mmu-mir-181b-5p	MIMAT0000673	Osbpl3	71726	HITS-CLIP	25083871	Unspecified
mmu-mir-5113	MIMAT0020621	Pvrl4	71740	HITS-CLIP	23142080	Unspecified
mmu-mir-5113	MIMAT0020621	Pvrl4	71740	HITS-CLIP	25083871	Unspecified
mmu-mir-5113	MIMAT0020621	Pvrl4	71740	HITS-CLIP	23597149	Unspecified
mmu-mir-103-3p	MIMAT0000546	Dhdh	71755	HITS-CLIP	21258322	Unspecified
mmu-mir-103-3p	MIMAT0000546	Dhdh	71755	HITS-CLIP	25083871	Unspecified
mmu-mir-1192	MIMAT0005850	Tars2	71807	HITS-CLIP	21258322	Unspecified
mmu-mir-181b-5p	MIMAT0000673	Pdxp	223527	Microarray	18762567	Unspecified
mmu-mir-1192	MIMAT0005850	Pex13	72129	HITS-CLIP	21258322	Unspecified
mmu-mir-1192	MIMAT0005850	Pex13	72129	HITS-CLIP	25083871	Unspecified
mmu-mir-664-3p	MIMAT0012774	Otud6b	72267	HITS-CLIP	23142080	Unspecified
mmu-mir-200b-3p	MIMAT0000233	Sh2d4a	72281	HITS-CLIP	21258322	Unspecified
mmu-mir-692	MIMAT0003471	Lsm11	72290	HITS-CLIP	23142080	Unspecified
mmu-mir-692	MIMAT0003471	Lsm11	72290	HITS-CLIP	21258322	Unspecified
mmu-mir-692	MIMAT0003471	Lsm11	72290	HITS-CLIP	23597149	Unspecified
mmu-mir-674-5p	MIMAT0003740	Wdr89	72338	HITS-CLIP	21258322	Unspecified
mmu-mir-29b-3p	MIMAT0000127	Prr5l	72446	HITS-CLIP	21258322	Unspecified
mmu-mir-29c-3p	MIMAT0000536	Prr5l	72454	HITS-CLIP	21258322	Unspecified
mmu-mir-692	MIMAT0003471	Car10	72605	HITS-CLIP	21258322	Unspecified
mmu-let-7b-5p	MIMAT0000522	Lins	72635	HITS-CLIP	25083871	Unspecified
mmu-let-7c-5p	MIMAT0000523	Lins	72635	HITS-CLIP	25083871	Unspecified
mmu-mir-692	MIMAT0003471	Zfp839	72805	HITS-CLIP	21258322	Unspecified
mmu-mir-692	MIMAT0003471	Zfp839	72805	HITS-CLIP	25083871	Unspecified
mmu-mir-297a-5p	MIMAT0000375	Cox15	226139	HITS-CLIP	25083871	Unspecified
mmu-mir-103-3p	MIMAT0000546	Cox15	226139	HITS-CLIP	25083871	Unspecified
mmu-mir-1192	MIMAT0005850	Cox15	226139	HITS-CLIP	25083871	Unspecified
mmu-mir-297a-5p	MIMAT0000375	Cox15	226139	HITS-CLIP	23597149	Unspecified
mmu-mir-692	MIMAT0003471	Anln	68743	HITS-CLIP	25083871	Unspecified
mmu-mir-674-5p	MIMAT0003740	Dcaf4	73902	HITS-CLIP	21258322	Unspecified
mmu-mir-5113	MIMAT0020621	Psmb11	73902	HITS-CLIP	21258322	Unspecified
mmu-mir-297a-5p	MIMAT0000375	Tmco1	68944	HITS-CLIP	23597149	Unspecified
mmu-mir-568	MIMAT0004892	Psd2	74002	HITS-CLIP	21258322	Unspecified
mmu-mir-568	MIMAT0004892	Psd2	74002	HITS-CLIP	25083871	Unspecified
mmu-mir-692	MIMAT0003471	Steap2	74051	HITS-CLIP	25083871	Unspecified
mmu-mir-692	MIMAT0003471	Steap2	74051	HITS-CLIP	21258322	Unspecified
mmu-mir-692	MIMAT0003471	Steap2	74051	HITS-CLIP	23597149	Unspecified
mmu-mir-692	MIMAT0003471	Slc7a13	74090	HITS-CLIP	23597149	Unspecified
mmu-mir-1192	MIMAT0005850	Rnf6	74132	HITS-CLIP	25083871	Unspecified
mmu-mir-692	MIMAT0003471	Scyl3	74143	HITS-CLIP	23142080	Unspecified
mmu-mir-297a-5p	MIMAT0000375	Fblim1	74202	HITS-CLIP	23142080	Unspecified
mmu-mir-297a-5p	MIMAT0000375	Xrcc3	74335	HITS-CLIP	23597149	Unspecified
mmu-mir-692	MIMAT0003471	Myo18b	74376	HITS-CLIP	23597149	Unspecified
mmu-mir-1192	MIMAT0005850	Sgms2	74442	HITS-CLIP	21258322	Unspecified
mmu-mir-1192	MIMAT0005850	Sgms2	74442	HITS-CLIP	25083871	Unspecified
mmu-mir-1192	MIMAT0005850	D14Abb1e	218850	HITS-CLIP	21258322	Unspecified
mmu-mir-1192	MIMAT0005850	D14Abb1e	218850	HITS-CLIP	23597149	Unspecified
mmu-mir-1192	MIMAT0005850	Zfp871	208292	HITS-CLIP	25083871	Unspecified
mmu-mir-1192	MIMAT0005850	Mau2	74549	HITS-CLIP	25083871	Unspecified
mmu-mir-5113	MIMAT0020621	Rnf185	109006	HITS-CLIP	23142080	Unspecified
mmu-mir-1192	MIMAT0005850	Cul5	75729	HITS-CLIP	25083871	Unspecified
mmu-mir-1192	MIMAT0005850	Fam227a	75729	HITS-CLIP	21258322	Unspecified
mmu-mir-1192	MIMAT0005850	Dcaf17	75767	HITS-CLIP	21258322	Unspecified
mmu-let-7c-5p	MIMAT0000523	Zfp444	72667	HITS-CLIP	21258322	Unspecified
mmu-let-7b-5p	MIMAT0000522	Zfp444	72667	HITS-CLIP	21258322	Unspecified
mmu-mir-3076-5p	MIMAT0014860	Slc18b1	117167	HITS-CLIP	21258322	Unspecified
mmu-mir-705	MIMAT0003495	Slc18b1	117167	HITS-CLIP	21258322	Unspecified
mmu-mir-674-5p	MIMAT0003740	Churc1	211151	HITS-CLIP	23597149	Unspecified
mmu-mir-674-5p	MIMAT0003740	Churc1	76485	HITS-CLIP	21258322	Unspecified
mmu-mir-1192	MIMAT0005850	Kdelc2	68304	HITS-CLIP	21258322	Unspecified
mmu-mir-297a-5p	MIMAT0000375	Gatc	384281	HITS-CLIP	23597149	Unspecified
mmu-mir-5113	MIMAT0020621	Fam81a	76886	HITS-CLIP	23142080	Unspecified
mmu-mir-1192	MIMAT0005850	Fam178a	226151	HITS-CLIP	25083871	Unspecified
mmu-mir-1192	MIMAT0005850	Fbxo42	77766	HITS-CLIP	21258322	Unspecified
mmu-mir-674-5p	MIMAT0003740	Ypel2	106583	HITS-CLIP	21258322	Unspecified
mmu-mir-5113	MIMAT0020621	Nxpe2	70503	HITS-CLIP	21258322	Unspecified
mmu-mir-3076-3p	MIMAT0014861	Brd8	224703	HITS-CLIP	25083871	Unspecified
mmu-mir-674-5p	MIMAT0003740	Nol3	78688	HITS-CLIP	21258322	Unspecified
mmu-mir-200b-3p	MIMAT0000233	Rassf10	78748	HITS-CLIP	23142080	Unspecified
mmu-mir-181b-5p	MIMAT0000673	Fam122b	71999	HITS-CLIP	25083871	Unspecified
mmu-mir-1192	MIMAT0005850	Usp54	78787	HITS-CLIP	25083871	Unspecified
mmu-mir-1192	MIMAT0005850	Gmip	78816	HITS-CLIP	25083871	Unspecified
mmu-mir-29b-3p	MIMAT0000127	Pigt	78928	HITS-CLIP	21258322	Unspecified
mmu-mir-29c-3p	MIMAT0000536	Pigt	78935	HITS-CLIP	21258322	Unspecified
mmu-mir-692	MIMAT0003471	Calcrl	54598	HITS-CLIP	25083871	Unspecified
mmu-mir-692	MIMAT0003471	Calcrl	54598	HITS-CLIP	21258322	Unspecified
mmu-mir-692	MIMAT0003471	Calcrl	329002	HITS-CLIP	23597149	Unspecified
mmu-mir-1192	MIMAT0005850	Dusp10	63953	HITS-CLIP	25083871	Unspecified
mmu-mir-5113	MIMAT0020621	Clptm1	56457	HITS-CLIP	21258322	Unspecified
mmu-mir-5113	MIMAT0020621	Clptm1	56457	HITS-CLIP	25083871	Unspecified
mmu-mir-1192	MIMAT0005850	Zbtb21	114565	HITS-CLIP	21258322	Unspecified
mmu-mir-1192	MIMAT0005850	Xrcc2	57434	HITS-CLIP	21258322	Unspecified
mmu-mir-664-3p	MIMAT0012774	Rgs17	56533	HITS-CLIP	23142080	Unspecified
mmu-mir-1192	MIMAT0005850	Prpmp5	100502592	HITS-CLIP	25083871	Unspecified
mmu-mir-1192	MIMAT0005850	Prpmp5	105242791	HITS-CLIP	25083871	Unspecified
mmu-mir-1192	MIMAT0005850	Prpmp5	381832	HITS-CLIP	25083871	Unspecified
mmu-mir-1192	MIMAT0005850	Rplp0	56367	HITS-CLIP	25083871	Unspecified
mmu-mir-664-3p	MIMAT0012774	Scoc	56367	HITS-CLIP	23142080	Unspecified
mmu-mir-181b-5p	MIMAT0000673	Ms4a4c	64380	HITS-CLIP	21258322	Unspecified
mmu-mir-181b-5p	MIMAT0000673	Ms4a4c	64380	HITS-CLIP	23597149	Unspecified
mmu-mir-23b-3p	MIMAT0000125	Ms4a4c	64380	HITS-CLIP	23597149	Unspecified
mmu-mir-181b-5p	MIMAT0000673	Ms4a4c	64380	HITS-CLIP	19536157	Unspecified
mmu-mir-23b-3p	MIMAT0000125	Ms4a4c	64380	HITS-CLIP	21258322	Unspecified
mmu-mir-23b-3p	MIMAT0000125	Ms4a4c	64380	HITS-CLIP	19536157	Unspecified
mmu-mir-297a-5p	MIMAT0000375	Kcnip3	56461	HITS-CLIP	25083871	Unspecified
mmu-mir-297a-5p	MIMAT0000375	Kcnip3	56351	HITS-CLIP	21258322	Unspecified
mmu-mir-674-5p	MIMAT0003740	Tyk2	65102	HITS-CLIP	21258322	Unspecified
mmu-mir-1192	MIMAT0005850	Rrad	56437	HITS-CLIP	25083871	Unspecified
mmu-mir-1192	MIMAT0005850	Tdrd1	83561	HITS-CLIP	25083871	Unspecified
mmu-mir-664-3p	MIMAT0012774	Sycp2	93679	HITS-CLIP	25083871	Unspecified
mmu-mir-674-5p	MIMAT0003740	Zfp202	83771	HITS-CLIP	21258322	Unspecified
mmu-mir-692	MIMAT0003471	Crispld1	83691	HITS-CLIP	23597149	Unspecified
mmu-mir-692	MIMAT0003471	Crispld1	93695	HITS-CLIP	25083871	Unspecified
mmu-mir-297a-5p	MIMAT0000375	Lin7a	108030	HITS-CLIP	23597149	Unspecified
mmu-mir-1192	MIMAT0005850	Narg2	93697	HITS-CLIP	25083871	Unspecified
mmu-mir-297a-5p	MIMAT0000375	Clec2h	94047	HITS-CLIP	25083871	Unspecified
mmu-mir-674-5p	MIMAT0003740	Loxl2	94352	HITS-CLIP	21258322	Unspecified
mmu-mir-674-5p	MIMAT0003740	Loxl2	100862072	HITS-CLIP	21258322	Unspecified
mmu-mir-674-5p	MIMAT0003740	Loxl2	94352	HITS-CLIP	23597149	Unspecified
mmu-mir-674-5p	MIMAT0003740	Loxl2	100862072	HITS-CLIP	23597149	Unspecified
mmu-mir-692	MIMAT0003471	Galnt13	271786	HITS-CLIP	21258322	Unspecified
mmu-mir-692	MIMAT0003471	Galnt13	271786	HITS-CLIP	25083871	Unspecified
mmu-mir-692	MIMAT0003471	Galnt13	227746	HITS-CLIP	23597149	Unspecified
mmu-mir-674-5p	MIMAT0003740	Clca2	229933	HITS-CLIP	21258322	Unspecified
mmu-mir-568	MIMAT0004892	Dcaf10	242418	HITS-CLIP	25083871	Unspecified
mmu-mir-1192	MIMAT0005850	Kctd10	232023	HITS-CLIP	25083871	Unspecified
mmu-mir-692	MIMAT0003471	AI987944	277939	HITS-CLIP	23142080	Unspecified
mmu-mir-692	MIMAT0003471	AI987944	277939	HITS-CLIP	25083871	Unspecified
mmu-mir-5113	MIMAT0020621	Exoc8	102058	HITS-CLIP	25083871	Unspecified
mmu-mir-1192	MIMAT0005850	Arhgef18	102098	HITS-CLIP	25083871	Unspecified
mmu-mir-297a-5p	MIMAT0000375	Tmem26	327766	HITS-CLIP	25083871	Unspecified
mmu-let-7b-5p	MIMAT0000522	Tug1	103775	Sequencing	19536157	Unspecified
mmu-mir-1192	MIMAT0005850	Sgsm2	104859	HITS-CLIP	25083871	Unspecified
mmu-mir-1192	MIMAT0005850	Deptor	97998	HITS-CLIP	25083871	Unspecified
mmu-mir-5113	MIMAT0020621	Prrxl1	272790	HITS-CLIP	21258322	Unspecified
mmu-mir-674-5p	MIMAT0003740	Aipl1	68468	HITS-CLIP	21258322	Unspecified
mmu-mir-1192	MIMAT0005850	Boc	117606	HITS-CLIP	25083871	Unspecified
mmu-mir-29b-3p	MIMAT0000127	Col4a6	71263	Luciferase assay//qRT-PCR//Western blot	23139829	Unspecified
mmu-mir-692	MIMAT0003471	Plxnb1	235611	HITS-CLIP	25083871	Unspecified
mmu-mir-692	MIMAT0003471	Plxnb1	235611	HITS-CLIP	21258322	Unspecified
mmu-mir-692	MIMAT0003471	Plxnb1	235611	HITS-CLIP	26203562	Unspecified
mmu-mir-1192	MIMAT0005850	Ube4a	140765	HITS-CLIP	25083871	Unspecified
mmu-mir-568	MIMAT0004892	Ttbk2	140810	HITS-CLIP	21258322	Unspecified
mmu-mir-3076-3p	MIMAT0014861	Slc2a10	170441	HITS-CLIP	25083871	Unspecified
mmu-mir-3076-3p	MIMAT0014861	Slc2a10	170441	HITS-CLIP	23597149	Unspecified
mmu-mir-664-3p	MIMAT0012774	Mlph	171531	HITS-CLIP	21258322	Unspecified
mmu-mir-1192	MIMAT0005850	Pla2g15	243743	HITS-CLIP	21258322	Unspecified
mmu-mir-297a-5p	MIMAT0000375	Tnfsf15	192289	HITS-CLIP	25083871	Unspecified
mmu-mir-1192	MIMAT0005850	Sertad3	170756	HITS-CLIP	21258322	Unspecified
mmu-mir-1192	MIMAT0005850	Slc24a6	170756	HITS-CLIP	21258322	Unspecified
mmu-mir-568	MIMAT0004892	Phc3	241915	HITS-CLIP	25083871	Unspecified
mmu-mir-133a-3p	MIMAT0000145	Acer1	171168	HITS-CLIP	21258322	Unspecified
mmu-mir-1192	MIMAT0005850	Acer1	171168	HITS-CLIP	21258322	Unspecified
mmu-mir-1192	MIMAT0005850	Wfdc12	192657	HITS-CLIP	21258322	Unspecified
mmu-mir-297a-5p	MIMAT0000375	Ell2	192657	HITS-CLIP	25083871	Unspecified
mmu-mir-692	MIMAT0003471	Nav2	78286	HITS-CLIP	25083871	Unspecified
mmu-mir-297a-5p	MIMAT0000375	Alkbh1	211064	HITS-CLIP	23597149	Unspecified
mmu-mir-297a-5p	MIMAT0000375	Alkbh1	654309	HITS-CLIP	23597149	Unspecified
mmu-mir-297a-5p	MIMAT0000375	Alkbh1	211064	HITS-CLIP	19536157	Unspecified
mmu-mir-297a-5p	MIMAT0000375	Alkbh1	654309	HITS-CLIP	19536157	Unspecified
mmu-mir-297a-5p	MIMAT0000375	Alkbh1	211064	HITS-CLIP	25083871	Unspecified
mmu-mir-297a-5p	MIMAT0000375	Alkbh1	654309	HITS-CLIP	25083871	Unspecified
mmu-mir-3076-5p	MIMAT0014860	Rgs9bp	243923	HITS-CLIP	25083871	Unspecified
mmu-mir-1192	MIMAT0005850	Ftsjd1	233887	HITS-CLIP	25083871	Unspecified
mmu-mir-1192	MIMAT0005850	Pycr1	209027	HITS-CLIP	21258322	Unspecified
mmu-mir-674-5p	MIMAT0003740	Pla2g4b	211429	HITS-CLIP	21258322	Unspecified
mmu-mir-674-5p	MIMAT0003740	Tapbpl	213233	HITS-CLIP	21258322	Unspecified
mmu-mir-297a-5p	MIMAT0000375	Slc5a8	216225	HITS-CLIP	21258322	Unspecified
mmu-mir-5113	MIMAT0020621	Cbwd1	226043	HITS-CLIP	21258322	Unspecified
mmu-mir-674-5p	MIMAT0003740	Exosc2	227715	HITS-CLIP	21258322	Unspecified
mmu-mir-692	MIMAT0003471	Ms4a6c	73656	HITS-CLIP	21258322	Unspecified
mmu-mir-674-5p	MIMAT0003740	Rin1	225870	HITS-CLIP	21258322	Unspecified
mmu-mir-297a-5p	MIMAT0000375	Zc3h12a	230738	HITS-CLIP	25083871	Unspecified
mmu-mir-297a-5p	MIMAT0000375	Acmsd	266645	HITS-CLIP	25083871	Unspecified
mmu-mir-297a-5p	MIMAT0000375	Unc5d	210801	HITS-CLIP	25083871	Unspecified
mmu-mir-297a-5p	MIMAT0000375	Unc5d	243833	HITS-CLIP	23597149	Unspecified
mmu-mir-692	MIMAT0003471	Tbx22	245572	HITS-CLIP	21258322	Unspecified
mmu-mir-692	MIMAT0003471	Tbx22	102423	HITS-CLIP	23597149	Unspecified
mmu-mir-5113	MIMAT0020621	Hinfp	102423	HITS-CLIP	23142080	Unspecified
mmu-mir-133a-3p	MIMAT0000145	Rapgef3	223864	Flow//Immunofluorescence//Immunohistochemistry//Immunoprecipitaion//Luciferase assay//qRT-PCR//Western blot	24807785	Unspecified
mmu-mir-297a-5p	MIMAT0000375	Fam214b	230088	HITS-CLIP	25083871	Unspecified
mmu-mir-1192	MIMAT0005850	Gpr183	269604	HITS-CLIP	25083871	Unspecified
mmu-mir-1192	MIMAT0005850	Cxxc4	319480	HITS-CLIP	25083871	Unspecified
mmu-mir-692	MIMAT0003471	Ppp6r1	243819	HITS-CLIP	21258322	Unspecified
mmu-mir-1192	MIMAT0005850	Syt15	319508	HITS-CLIP	21258322	Unspecified
mmu-mir-1192	MIMAT0005850	Prrg4	228413	HITS-CLIP	23597149	Unspecified
mmu-mir-1192	MIMAT0005850	Prrg4	228413	HITS-CLIP	21258322	Unspecified
mmu-mir-1192	MIMAT0005850	Prrg4	228413	HITS-CLIP	23142080	Unspecified
mmu-mir-1192	MIMAT0005850	Prrg4	228357	HITS-CLIP	25083871	Unspecified
mmu-mir-297a-5p	MIMAT0000375	Nwd1	319555	HITS-CLIP	23597149	Unspecified
mmu-mir-1192	MIMAT0005850	Zmat1	215693	HITS-CLIP	25083871	Unspecified
mmu-mir-692	MIMAT0003471	Cd300lf	246746	HITS-CLIP	21258322	Unspecified
mmu-mir-692	MIMAT0003471	Cd300lf	244349	HITS-CLIP	23597149	Unspecified
mmu-mir-23b-3p	MIMAT0000125	Tmem241	338363	HITS-CLIP	25083871	Unspecified
mmu-mir-692	MIMAT0003471	Frmd3	242506	HITS-CLIP	21258322	Unspecified
mmu-mir-692	MIMAT0003471	Frmd3	242506	HITS-CLIP	23597149	Unspecified
mmu-mir-692	MIMAT0003471	Frmd3	230801	HITS-CLIP	25083871	Unspecified
mmu-mir-29b-3p	MIMAT0000127	Lactb2	212442	HITS-CLIP	21258322	Unspecified
mmu-mir-29c-3p	MIMAT0000536	Lactb2	212442	HITS-CLIP	21258322	Unspecified
mmu-mir-568	MIMAT0004892	Zfp322a	218100	HITS-CLIP	25083871	Unspecified
mmu-mir-200b-3p	MIMAT0000233	Ddx26b	236790	HITS-CLIP	25083871	Unspecified
mmu-mir-674-5p	MIMAT0003740	Nup133	234865	HITS-CLIP	21258322	Unspecified
mmu-mir-1192	MIMAT0005850	Krt222	268481	HITS-CLIP	25083871	Unspecified
mmu-mir-568	MIMAT0004892	Tshz3	243931	HITS-CLIP	25083871	Unspecified
mmu-mir-5113	MIMAT0020621	Ddx58	245527	HITS-CLIP	21258322	Unspecified
mmu-mir-297a-5p	MIMAT0000375	Uhrf1bp1l	75089	HITS-CLIP	25083871	Unspecified
mmu-mir-297a-5p	MIMAT0000375	Cpne9	211232	HITS-CLIP	25083871	Unspecified
mmu-mir-674-5p	MIMAT0003740	Cpne9	211232	HITS-CLIP	21258322	Unspecified
mmu-mir-200b-3p	MIMAT0000233	Mphosph9	269702	HITS-CLIP	25083871	Unspecified
mmu-mir-200b-3p	MIMAT0000233	Mphosph9	269702	HITS-CLIP	23142080	Unspecified
mmu-mir-1192	MIMAT0005850	Agphd1	235386	HITS-CLIP	25083871	Unspecified
mmu-mir-3076-5p	MIMAT0014860	Gdpgp1	269952	HITS-CLIP	21258322	Unspecified
mmu-mir-5113	MIMAT0020621	Scfd2	212986	HITS-CLIP	21258322	Unspecified
mmu-mir-692	MIMAT0003471	Scfd2	234725	HITS-CLIP	23597149	Unspecified
mmu-mir-1192	MIMAT0005850	Plekhm3	241075	HITS-CLIP	25083871	Unspecified
mmu-mir-692	MIMAT0003471	Pirt	68750	HITS-CLIP	23597149	Unspecified
mmu-mir-1192	MIMAT0005850	Fubp3	320267	HITS-CLIP	21258322	Unspecified
mmu-mir-1192	MIMAT0005850	Fubp3	320302	HITS-CLIP	25083871	Unspecified
mmu-mir-692	MIMAT0003471	Bnc2	242509	HITS-CLIP	25083871	Unspecified
mmu-mir-181b-5p	MIMAT0000673	Bnc2	242509	HITS-CLIP	25083871	Unspecified
mmu-mir-5113	MIMAT0020621	Zfp799	240064	HITS-CLIP	21258322	Unspecified
mmu-mir-1192	MIMAT0005850	Zfp799	240064	HITS-CLIP	21258322	Unspecified
mmu-mir-1192	MIMAT0005850	Alg6	320438	HITS-CLIP	25083871	Unspecified
mmu-mir-1192	MIMAT0005850	Ubn2	320538	HITS-CLIP	25083871	Unspecified
mmu-mir-297a-5p	MIMAT0000375	Ubn2	320538	HITS-CLIP	25083871	Unspecified
mmu-mir-5113	MIMAT0020621	Tmem88b	320587	HITS-CLIP	21258322	Unspecified
mmu-mir-3076-3p	MIMAT0014861	Svopl	320590	HITS-CLIP	21258322	Unspecified
mmu-mir-181b-5p	MIMAT0000673	Ptchd2	242748	HITS-CLIP	23597149	Unspecified
mmu-mir-181b-5p	MIMAT0000673	Ptchd2	242748	HITS-CLIP	25083871	Unspecified
mmu-mir-692	MIMAT0003471	Rab11fip3	207181	HITS-CLIP	21258322	Unspecified
mmu-mir-297a-5p	MIMAT0000375	Prr11	270906	HITS-CLIP	25083871	Unspecified
mmu-mir-103-3p	MIMAT0000546	Mbtps2	270669	HITS-CLIP	25083871	Unspecified
mmu-mir-664-3p	MIMAT0012774	Aldh1l2	226861	HITS-CLIP	23142080	Unspecified
mmu-mir-1192	MIMAT0005850	Ubtd2	338354	HITS-CLIP	25083871	Unspecified
mmu-mir-5113	MIMAT0020621	Rbm41	237073	HITS-CLIP	21258322	Unspecified
mmu-mir-692	MIMAT0003471	BC021785	215928	HITS-CLIP	25083871	Unspecified
mmu-mir-692	MIMAT0003471	BC021785	215928	HITS-CLIP	23597149	Unspecified
mmu-mir-23b-3p	MIMAT0000125	Itpk1	217837	HITS-CLIP	21258322	Unspecified
mmu-mir-181b-5p	MIMAT0000673	Itpk1	217837	HITS-CLIP	21258322	Unspecified
mmu-mir-297a-5p	MIMAT0000375	Vps33b	233405	HITS-CLIP	21258322	Unspecified
mmu-mir-297a-5p	MIMAT0000375	Vps33b	233405	HITS-CLIP	23597149	Unspecified
mmu-mir-297a-5p	MIMAT0000375	St18	237175	HITS-CLIP	21258322	Unspecified
mmu-mir-692	MIMAT0003471	Gpr64	23966	HITS-CLIP	23597149	Unspecified
mmu-mir-1192	MIMAT0005850	BC030476	239368	HITS-CLIP	25083871	Unspecified
mmu-mir-692	MIMAT0003471	Hist1h2be	319190	HITS-CLIP	23142080	Unspecified
mmu-let-7b-5p	MIMAT0000522	Tnfrsf26	244237	HITS-CLIP	21258322	Unspecified
mmu-let-7c-5p	MIMAT0000523	Tnfrsf26	244237	HITS-CLIP	21258322	Unspecified
mmu-mir-692	MIMAT0003471	Mex3c	243371	HITS-CLIP	23142080	Unspecified
mmu-mir-297a-5p	MIMAT0000375	BC003965	214489	HITS-CLIP	25083871	Unspecified
mmu-mir-5113	MIMAT0020621	BC003965	214489	HITS-CLIP	21258322	Unspecified
mmu-mir-297a-5p	MIMAT0000375	Txlnb	378431	HITS-CLIP	25083871	Unspecified
mmu-mir-181b-5p	MIMAT0000673	Dagla	240068	HITS-CLIP	21258322	Unspecified
mmu-mir-200b-3p	MIMAT0000233	Fhod1	234686	HITS-CLIP	26203562	Unspecified
mmu-mir-200b-3p	MIMAT0000233	Fhod1	234686	HITS-CLIP	25083871	Unspecified
mmu-mir-200b-3p	MIMAT0000233	Fhod1	234686	HITS-CLIP	23597149	Unspecified
mmu-mir-297a-5p	MIMAT0000375	Gcnt4	218476	HITS-CLIP	25083871	Unspecified
mmu-mir-664-3p	MIMAT0012774	Ado	211488	HITS-CLIP	25083871	Unspecified
mmu-mir-1192	MIMAT0005850	Ado	211488	HITS-CLIP	21258322	Unspecified
mmu-mir-1192	MIMAT0005850	Ado	211488	HITS-CLIP	25083871	Unspecified
mmu-mir-692	MIMAT0003471	Elmsan1	238317	HITS-CLIP	23142080	Unspecified
mmu-mir-705	MIMAT0003495	Slc10a5	242037	HITS-CLIP	23142080	Unspecified
mmu-mir-674-5p	MIMAT0003740	Rmi2	223970	HITS-CLIP	21258322	Unspecified
mmu-mir-5113	MIMAT0020621	Rmi2	223970	HITS-CLIP	21258322	Unspecified
mmu-mir-1192	MIMAT0005850	Espnl	229672	HITS-CLIP	25083871	Unspecified
mmu-mir-23b-3p	MIMAT0000125	Rbm44	380702	HITS-CLIP	23142080	Unspecified
mmu-mir-297a-5p	MIMAT0000375	Nxpe3	385658	HITS-CLIP	25083871	Unspecified
mmu-mir-181b-5p	MIMAT0000673	Fam160b2	239170	HITS-CLIP	21258322	Unspecified
mmu-mir-181b-5p	MIMAT0000673	Fam160b2	239170	HITS-CLIP	23597149	Unspecified
mmu-mir-664-3p	MIMAT0012774	Fam160b2	239170	HITS-CLIP	23142080	Unspecified
mmu-mir-181b-5p	MIMAT0000673	Fam160b2	239170	HITS-CLIP	25083871	Unspecified
mmu-mir-23b-3p	MIMAT0000125	Fam160b2	239170	HITS-CLIP	23597149	Unspecified
mmu-mir-23b-3p	MIMAT0000125	Fam160b2	239170	HITS-CLIP	25083871	Unspecified
mmu-mir-23b-3p	MIMAT0000125	Fam160b2	239170	HITS-CLIP	23142080	Unspecified
mmu-mir-23b-3p	MIMAT0000125	Fam160b2	239170	HITS-CLIP	19536157	Unspecified
mmu-mir-664-3p	MIMAT0012774	Fam160b2	239170	HITS-CLIP	21258322	Unspecified
mmu-mir-664-3p	MIMAT0012774	Fam160b2	239170	HITS-CLIP	23597149	Unspecified
mmu-mir-181b-5p	MIMAT0000673	Fam160b2	239170	HITS-CLIP	23142080	Unspecified
mmu-mir-181b-5p	MIMAT0000673	Fam160b2	239170	HITS-CLIP	19536157	Unspecified
mmu-mir-664-3p	MIMAT0012774	Fam160b2	239170	HITS-CLIP	25083871	Unspecified
mmu-mir-664-3p	MIMAT0012774	Fam160b2	239170	HITS-CLIP	19536157	Unspecified
mmu-mir-23b-3p	MIMAT0000125	Fam160b2	239170	HITS-CLIP	21258322	Unspecified
mmu-mir-692	MIMAT0003471	Nat14	269854	HITS-CLIP	25083871	Unspecified
mmu-mir-692	MIMAT0003471	Nat14	269854	HITS-CLIP	21258322	Unspecified
mmu-mir-692	MIMAT0003471	Nat14	269854	HITS-CLIP	23597149	Unspecified
mmu-mir-692	MIMAT0003471	Nat14	407800	HITS-CLIP	26203562	Unspecified
mmu-mir-1192	MIMAT0005850	Ecm2	227933	HITS-CLIP	21258322	Unspecified
mmu-mir-705	MIMAT0003495	Tstd2	272027	HITS-CLIP	23142080	Unspecified
mmu-mir-29b-3p	MIMAT0000127	Rsad1	237926	HITS-CLIP	21258322	Unspecified
mmu-mir-29c-3p	MIMAT0000536	Rsad1	216227	HITS-CLIP	21258322	Unspecified
mmu-mir-200b-3p	MIMAT0000233	Zfp459	328274	HITS-CLIP	21258322	Unspecified
mmu-mir-1192	MIMAT0005850	Skint7	245050	HITS-CLIP	25083871	Unspecified
mmu-mir-1192	MIMAT0005850	Skint7	245050	HITS-CLIP	25083871	Unspecified
mmu-mir-1192	MIMAT0005850	Apol10b	224224	HITS-CLIP	25083871	Unspecified
mmu-mir-1192	MIMAT0005850	Apol10b	224224	HITS-CLIP	25083871	Unspecified
mmu-mir-181b-5p	MIMAT0000673	Arhgef15	442801	HITS-CLIP	23597149	Unspecified
mmu-mir-181b-5p	MIMAT0000673	Arhgef15	442801	HITS-CLIP	21258322	Unspecified
mmu-mir-181b-5p	MIMAT0000673	Arhgef15	442801	HITS-CLIP	25083871	Unspecified
mmu-mir-181b-5p	MIMAT0000673	Arhgef15	442801	HITS-CLIP	19536157	Unspecified
mmu-mir-692	MIMAT0003471	Mcmdc2	240697	HITS-CLIP	21258322	Unspecified
mmu-mir-674-5p	MIMAT0003740	Tmem69	230657	HITS-CLIP	23597149	Unspecified
mmu-mir-674-5p	MIMAT0003740	Tmem69	230657	HITS-CLIP	21258322	Unspecified
mmu-mir-674-5p	MIMAT0003740	Mfsd2b	432628	HITS-CLIP	21258322	Unspecified
mmu-mir-674-5p	MIMAT0003740	Zfp607	380701	HITS-CLIP	21258322	Unspecified
mmu-mir-692	MIMAT0003471	Adamts17	233332	HITS-CLIP	23597149	Unspecified
mmu-mir-692	MIMAT0003471	Adamts17	233332	HITS-CLIP	21258322	Unspecified
mmu-mir-692	MIMAT0003471	Adamts17	233332	HITS-CLIP	25083871	Unspecified
mmu-mir-674-5p	MIMAT0003740	Slc22a15	277898	HITS-CLIP	21258322	Unspecified
mmu-mir-297a-5p	MIMAT0000375	Slc15a5	328370	HITS-CLIP	25083871	Unspecified
mmu-mir-297a-5p	MIMAT0000375	Ehbp1l1	114601	HITS-CLIP	25083871	Unspecified
mmu-mir-692	MIMAT0003471	Zfp953	72536	HITS-CLIP	23142080	Unspecified
mmu-mir-297a-5p	MIMAT0000375	Heatr2	433956	HITS-CLIP	23597149	Unspecified
mmu-mir-297a-5p	MIMAT0000375	Heatr2	433956	HITS-CLIP	25083871	Unspecified
mmu-mir-297a-5p	MIMAT0000375	Gm5464	432870	HITS-CLIP	25083871	Unspecified
mmu-mir-1192	MIMAT0005850	Gm5464	432870	HITS-CLIP	25083871	Unspecified
mmu-mir-297a-5p	MIMAT0000375	Gm5464	432870	HITS-CLIP	23597149	Unspecified
mmu-mir-692	MIMAT0003471	Gm4944	240038	HITS-CLIP	21258322	Unspecified
mmu-mir-297a-5p	MIMAT0000375	Mylk4	238564	HITS-CLIP	21258322	Unspecified
mmu-mir-1192	MIMAT0005850	Gm5415	240327	HITS-CLIP	25083871	Unspecified
mmu-mir-1192	MIMAT0005850	Gm5415	240327	HITS-CLIP	25083871	Unspecified
mmu-mir-692	MIMAT0003471	Gm4951	240327	HITS-CLIP	21258322	Unspecified
mmu-mir-1192	MIMAT0005850	Gm5868	666926	HITS-CLIP	25083871	Unspecified
mmu-mir-1192	MIMAT0005850	Gm5148	381438	HITS-CLIP	25083871	Unspecified
mmu-mir-1192	MIMAT0005850	Bend4	666938	HITS-CLIP	25083871	Unspecified
mmu-mir-29c-3p	MIMAT0000536	Gm14137	623781	HITS-CLIP	21258322	Unspecified
mmu-mir-29b-3p	MIMAT0000127	Gm14137	623781	HITS-CLIP	21258322	Unspecified
mmu-let-7b-5p	MIMAT0000522	Mup17	100039089	HITS-CLIP	23597149	Unspecified
mmu-let-7b-5p	MIMAT0000522	Mup17	100048885	HITS-CLIP	23597149	Unspecified
mmu-let-7b-5p	MIMAT0000522	Mup17	100039206	HITS-CLIP	23597149	Unspecified
mmu-let-7c-5p	MIMAT0000523	Mup17	100039089	HITS-CLIP	23597149	Unspecified
mmu-let-7c-5p	MIMAT0000523	Mup17	100048885	HITS-CLIP	23597149	Unspecified
mmu-let-7c-5p	MIMAT0000523	Mup17	100039206	HITS-CLIP	23597149	Unspecified
mmu-let-7c-5p	MIMAT0000523	Mup11	100039028	HITS-CLIP	23597149	Unspecified
mmu-let-7b-5p	MIMAT0000522	Mup11	665622	HITS-CLIP	23597149	Unspecified
mmu-mir-1192	MIMAT0005850	Hist1h2br	100043688	HITS-CLIP	21258322	Unspecified
mmu-mir-674-5p	MIMAT0003740	Gm10778	667118	HITS-CLIP	21258322	Unspecified
mmu-mir-692	MIMAT0003471	Gbp10	100042450	HITS-CLIP	23142080	Unspecified
mmu-mir-664-3p	MIMAT0012774	Trim12c	319236	HITS-CLIP	25083871	Unspecified
mmu-mir-692	MIMAT0003471	Gm20172		HITS-CLIP	25083871	Unspecified
mmu-mir-692	MIMAT0003471	Gm20172		HITS-CLIP	23597149	Unspecified
mmu-mir-1192	MIMAT0005850	Adra2b	11554	HITS-CLIP	21258322	Unspecified
mmu-mir-133a-3p	MIMAT0000145	Adrb1	320129	Flow//Immunofluorescence//Immunohistochemistry//Immunoprecipitaion//Luciferase assay//qRT-PCR//Western blot	24807785	Unspecified
mmu-mir-297a-5p	MIMAT0000375	Cd28	12487	HITS-CLIP	25083871	Unspecified
mmu-mir-297a-5p	MIMAT0000375	Cd28	12487	HITS-CLIP	25083871	Unspecified
mmu-mir-692	MIMAT0003471	Cd53	12525	HITS-CLIP	25083871	Unspecified
mmu-mir-692	MIMAT0003471	F9	14071	HITS-CLIP	21258322	Unspecified
mmu-mir-29b-3p	MIMAT0000127	Col4a5	12830	Luciferase assay//qRT-PCR//Western blot	23139829	Unspecified
mmu-mir-674-5p	MIMAT0003740	Comt	12846	HITS-CLIP	21258322	Unspecified
mmu-mir-674-5p	MIMAT0003740	Comt	12846	HITS-CLIP	21258322	Unspecified
mmu-mir-674-5p	MIMAT0003740	Cyp2e1	13106	HITS-CLIP	21258322	Unspecified
mmu-mir-5113	MIMAT0020621	Hbp1	107448	HITS-CLIP	21258322	Unspecified
mmu-mir-5113	MIMAT0020621	Mylk	107589	HITS-CLIP	21258322	Unspecified
mmu-mir-692	MIMAT0003471	Dhh	13390	HITS-CLIP	21258322	Unspecified
mmu-mir-692	MIMAT0003471	Dsg1a	13614	HITS-CLIP	25083871	Unspecified
mmu-mir-297a-5p	MIMAT0000375	Eif2s1	13665	HITS-CLIP	25083871	Unspecified
mmu-mir-664-3p	MIMAT0012774	Emx2	13797	HITS-CLIP	21258322	Unspecified
mmu-mir-692	MIMAT0003471	Fut4	14387	HITS-CLIP	21258322	Unspecified
mmu-mir-1192	MIMAT0005850	Gata1	14562	HITS-CLIP	25083871	Unspecified
mmu-mir-133a-3p	MIMAT0000145	Gdf3	14562	HITS-CLIP	23142080	Unspecified
mmu-mir-1192	MIMAT0005850	Gna13	14674	HITS-CLIP	25083871	Unspecified
mmu-mir-181b-5p	MIMAT0000673	Hspa5	14829	Luciferase assay//qRT-PCR//Western blot	23900885	Unspecified
mmu-mir-692	MIMAT0003471	Grpr	14990	HITS-CLIP	23142080	Unspecified
mmu-mir-674-5p	MIMAT0003740	H2-T23	15040	HITS-CLIP	21258322	Unspecified
mmu-mir-692	MIMAT0003471	Hhex	15242	HITS-CLIP	25083871	Unspecified
mmu-mir-692	MIMAT0003471	Hhex	15242	HITS-CLIP	21258322	Unspecified
mmu-mir-705	MIMAT0003495	Hoxa10	15407	Luciferase assay//Microarray//qRT-PCR//Western blot	23598412	Unspecified
mmu-mir-1192	MIMAT0005850	Hoxd12	15438	HITS-CLIP	25083871	Unspecified
mmu-mir-3076-5p	MIMAT0014860	Igj	16181	HITS-CLIP	25083871	Unspecified
mmu-mir-692	MIMAT0003471	Maoa	17161	HITS-CLIP	21258322	Unspecified
mmu-mir-568	MIMAT0004892	Pax3	18505	HITS-CLIP	25083871	Unspecified
mmu-mir-1192	MIMAT0005850	Pfkl	18641	HITS-CLIP	25083871	Unspecified
mmu-mir-1192	MIMAT0005850	Pgm3	18682	HITS-CLIP	25083871	Unspecified
mmu-mir-133a-3p	MIMAT0000145	Prkacb	18753	Flow//Immunofluorescence//Immunohistochemistry//Immunoprecipitaion//Luciferase assay//qRT-PCR//Western blot	24807785	Unspecified
mmu-mir-200b-3p	MIMAT0000233	Pkd1	18787	Luciferase assay//Microarray//Northern blot//qRT-PCR//Western blot	23138483	Unspecified
mmu-mir-1192	MIMAT0005850	Plau	18792	HITS-CLIP	25083871	Unspecified
mmu-mir-1192	MIMAT0005850	Plaur	18793	HITS-CLIP	21258322	Unspecified
mmu-mir-3076-3p	MIMAT0014861	Ctsa	19025	HITS-CLIP	21258322	Unspecified
mmu-mir-692	MIMAT0003471	Prlr	19116	HITS-CLIP	23142080	Unspecified
mmu-mir-23b-3p	MIMAT0000125	Ptpre	19267	HITS-CLIP	21258322	Unspecified
mmu-mir-1192	MIMAT0005850	Sod2	20664	HITS-CLIP	25083871	Unspecified
mmu-mir-674-5p	MIMAT0003740	Med22	20933	HITS-CLIP	23142080	Unspecified
mmu-mir-23b-3p	MIMAT0000125	Tgfb2	21808	HITS-CLIP	25083871	Unspecified
mmu-mir-1192	MIMAT0005850	Tgfb2	21808	HITS-CLIP	25083871	Unspecified
mmu-mir-1192	MIMAT0005850	Ezr	22350	HITS-CLIP	25083871	Unspecified
mmu-mir-1192	MIMAT0005850	Wnt5a	22640	HITS-CLIP	25083871	Unspecified
mmu-mir-568	MIMAT0004892	Zfp11	22648	HITS-CLIP	25083871	Unspecified
mmu-mir-1192	MIMAT0005850	Adora2a	20444	HITS-CLIP	21258322	Unspecified
mmu-mir-200b-3p	MIMAT0000233	St3gal2	11861	HITS-CLIP	25083871	Unspecified
mmu-mir-664-3p	MIMAT0012774	Mc1r	17199	HITS-CLIP	23142080	Unspecified
mmu-mir-5113	MIMAT0020621	Prdx1	12512	HITS-CLIP	21258322	Unspecified
mmu-mir-674-5p	MIMAT0003740	Pola2	18969	HITS-CLIP	21258322	Unspecified
mmu-mir-674-5p	MIMAT0003740	Pola2	18969	HITS-CLIP	23597149	Unspecified
mmu-mir-297a-5p	MIMAT0000375	Htr1f	15557	HITS-CLIP	25083871	Unspecified
mmu-mir-692	MIMAT0003471	Gdi1	14567	HITS-CLIP	25083871	Unspecified
mmu-mir-692	MIMAT0003471	Gdi1	14567	HITS-CLIP	19536157	Unspecified
mmu-mir-692	MIMAT0003471	Gdi1	14567	HITS-CLIP	21258322	Unspecified
mmu-mir-692	MIMAT0003471	Gdi1	20512	HITS-CLIP	23597149	Unspecified
mmu-mir-692	MIMAT0003471	Gdi1	20512	HITS-CLIP	23142080	Unspecified
mmu-mir-664-3p	MIMAT0012774	1200011I18Rik	67467	HITS-CLIP	25083871	Unspecified
mmu-mir-297a-5p	MIMAT0000375	1600012H06Rik	67912	Sequencing	19536157	Unspecified
mmu-let-7b-5p	MIMAT0000522	1600012H06Rik	67912	Sequencing	19536157	Unspecified
mmu-mir-674-5p	MIMAT0003740	1700016D06Rik	76413	HITS-CLIP	21258322	Unspecified
mmu-let-7b-5p	MIMAT0000522	1700017B05Rik	74211	Sequencing	19536157	Unspecified
mmu-mir-674-5p	MIMAT0003740	1700047I17Rik2	100101807	HITS-CLIP	21258322	Unspecified
mmu-let-7b-5p	MIMAT0000522	1700052N19Rik	73419	Sequencing	19536157	Unspecified
mmu-mir-692	MIMAT0003471	2510002D24Rik	72307	HITS-CLIP	21258322	Unspecified
mmu-mir-692	MIMAT0003471	2510002D24Rik	72307	HITS-CLIP	25083871	Unspecified
mmu-mir-692	MIMAT0003471	2510002D24Rik	72307	HITS-CLIP	26203562	Unspecified
mmu-mir-692	MIMAT0003471	2510002D24Rik	72307	HITS-CLIP	19536157	Unspecified
mmu-mir-692	MIMAT0003471	2510002D24Rik	72307	HITS-CLIP	23597149	Unspecified
mmu-mir-297a-5p	MIMAT0000375	2700081O15Rik	108899	Sequencing	19536157	Unspecified
mmu-let-7b-5p	MIMAT0000522	2700081O15Rik	108899	Sequencing	19536157	Unspecified
mmu-let-7b-5p	MIMAT0000522	2700089E24Rik	381820	Sequencing	19536157	Unspecified
mmu-mir-297a-5p	MIMAT0000375	2810407C02Rik	69227	Sequencing	19536157	Unspecified
mmu-mir-29c-3p	MIMAT0000536	4921536K21Rik	67430	HITS-CLIP	21258322	Unspecified
mmu-mir-29b-3p	MIMAT0000127	4921536K21Rik	67430	HITS-CLIP	21258322	Unspecified
mmu-mir-1192	MIMAT0005850	4930427A07Rik	104732	HITS-CLIP	19536157	Unspecified
mmu-mir-5113	MIMAT0020621	4930427A07Rik	104732	HITS-CLIP	19536157	Unspecified
mmu-mir-5113	MIMAT0020621	4930427A07Rik	104732	HITS-CLIP	23597149	Unspecified
mmu-mir-5113	MIMAT0020621	4930427A07Rik	104732	HITS-CLIP	23142080	Unspecified
mmu-mir-5113	MIMAT0020621	4930427A07Rik	104732	HITS-CLIP	21258322	Unspecified
mmu-mir-5113	MIMAT0020621	4930427A07Rik	104732	HITS-CLIP	25083871	Unspecified
mmu-mir-1192	MIMAT0005850	4930427A07Rik	104732	HITS-CLIP	23597149	Unspecified
mmu-mir-1192	MIMAT0005850	4930539E08Rik	207819	HITS-CLIP	25083871	Unspecified
mmu-mir-181b-5p	MIMAT0000673	4930563E22Rik		HITS-CLIP	21258322	Unspecified
mmu-mir-664-3p	MIMAT0012774	4930563E22Rik		HITS-CLIP	21258322	Unspecified
mmu-mir-692	MIMAT0003471	4931406C07Rik	70984	HITS-CLIP	21258322	Unspecified
mmu-let-7b-5p	MIMAT0000522	4931406C07Rik	70984	Sequencing	19536157	Unspecified
mmu-mir-297a-5p	MIMAT0000375	4931406P16Rik	233103	Sequencing	19536157	Unspecified
mmu-let-7b-5p	MIMAT0000522	4931428F04Rik	74356	Sequencing	19536157	Unspecified
mmu-let-7b-5p	MIMAT0000522	4933411K20Rik	66756	Sequencing	19536157	Unspecified
mmu-mir-692	MIMAT0003471	5730409E04Rik	230757	HITS-CLIP	19536157	Unspecified
mmu-mir-692	MIMAT0003471	5730409E04Rik	230757	HITS-CLIP	23597149	Unspecified
mmu-mir-692	MIMAT0003471	5730409E04Rik	230757	HITS-CLIP	25083871	Unspecified
mmu-mir-692	MIMAT0003471	5730409E04Rik	230757	HITS-CLIP	26203562	Unspecified
mmu-mir-1192	MIMAT0005850	9330159F19Rik	212448	HITS-CLIP	21258322	Unspecified
mmu-mir-674-5p	MIMAT0003740	A230046K03Rik	319277	HITS-CLIP	23597149	Unspecified
mmu-mir-674-5p	MIMAT0003740	A230046K03Rik	319277	HITS-CLIP	21258322	Unspecified
mmu-mir-297a-5p	MIMAT0000375	A530054K11Rik	212281	HITS-CLIP	25083871	Unspecified
mmu-mir-692	MIMAT0003471	A830018L16Rik	320492	HITS-CLIP	21258322	Unspecified
mmu-mir-692	MIMAT0003471	A830018L16Rik	320492	HITS-CLIP	25083871	Unspecified
mmu-mir-297a-5p	MIMAT0000375	Cpeb4	67579	Sequencing	19536157	Unspecified
mmu-mir-297a-5p	MIMAT0000375	Cpne3	70568	HITS-CLIP	21258322	Unspecified
mmu-mir-3076-3p	MIMAT0014861	Cpne3	70568	HITS-CLIP	21258322	Unspecified
mmu-let-7b-5p	MIMAT0000522	Abcc5	27416	Sequencing	19536157	Unspecified
mmu-mir-297a-5p	MIMAT0000375	Abcc9	20928	HITS-CLIP	23597149	Unspecified
mmu-let-7b-5p	MIMAT0000522	Abcg1	11307	Sequencing	19536157	Unspecified
mmu-let-7b-5p	MIMAT0000522	Apbb3	225372	Sequencing	19536157	Unspecified
mmu-mir-297a-5p	MIMAT0000375	Csnk1a1	93687	Sequencing	19536157	Unspecified
mmu-mir-297a-5p	MIMAT0000375	Acly	104112	Sequencing	19536157	Unspecified
mmu-let-7b-5p	MIMAT0000522	Csnk2a1	12995	Sequencing	19536157	Unspecified
mmu-mir-297a-5p	MIMAT0000375	Ctgf	14219	Sequencing	19536157	Unspecified
mmu-let-7b-5p	MIMAT0000522	Actg1	11465	Reporter assay	15131085	Unspecified
mmu-let-7b-5p	MIMAT0000522	Acvr1b	11479	Sequencing	19536157	Unspecified
mmu-mir-1192	MIMAT0005850	Hapln1	12950	HITS-CLIP	25083871	Unspecified
mmu-mir-29b-3p	MIMAT0000127	Acvr2a	11480	Luciferase assay//Microarray//Northern blot//qRT-PCR//Western blot	19342382	Unspecified
mmu-mir-297a-5p	MIMAT0000375	Adam10	11487	Sequencing	19536157	Unspecified
mmu-mir-297a-5p	MIMAT0000375	Adam12	11489	Sequencing	19536157	Unspecified
mmu-mir-692	MIMAT0003471	Adam19	11492	HITS-CLIP	21258322	Unspecified
mmu-mir-692	MIMAT0003471	Adam19	11492	HITS-CLIP	25083871	Unspecified
mmu-mir-692	MIMAT0003471	Adam19	11492	HITS-CLIP	23597149	Unspecified
mmu-mir-133a-3p	MIMAT0000145	Hdac4	208727	Microarray//Northern blot	16380711	Unspecified
mmu-mir-29b-3p	MIMAT0000127	Hdac4	208727	Luciferase assay//qRT-PCR//Western blot	21324893	Unspecified
mmu-let-7b-5p	MIMAT0000522	Adamts15	235130	Sequencing	19536157	Unspecified
mmu-mir-1192	MIMAT0005850	Adamts5	23794	HITS-CLIP	25083871	Unspecified
mmu-mir-181b-5p	MIMAT0000673	Adamts9	101401	HITS-CLIP	21258322	Unspecified
mmu-mir-181b-5p	MIMAT0000673	Adamts9	101401	HITS-CLIP	23597149	Unspecified
mmu-mir-297a-5p	MIMAT0000375	Cyb561d2	56368	Sequencing	19536157	Unspecified
mmu-mir-133a-3p	MIMAT0000145	Adcy6	11512	Flow//Immunofluorescence//Immunohistochemistry//Immunoprecipitaion//Luciferase assay//qRT-PCR//Western blot	24807785	Unspecified
mmu-mir-297a-5p	MIMAT0000375	Add1	11518	Sequencing	19536157	Unspecified
mmu-let-7b-5p	MIMAT0000522	Adipor2	68465	Sequencing	19536157	Unspecified
mmu-let-7b-5p	MIMAT0000522	Nf2	18016	HITS-CLIP	23597149	Unspecified
mmu-mir-181b-5p	MIMAT0000673	Higd1a	56295	Microarray	18762567	Unspecified
mmu-mir-692	MIMAT0003471	Higd1a	56295	HITS-CLIP	23142080	Unspecified
mmu-let-7b-5p	MIMAT0000522	Adra2a	11551	Sequencing	19536157	Unspecified
mmu-mir-297a-5p	MIMAT0000375	Aff4	93736	Sequencing	19536157	Unspecified
mmu-let-7b-5p	MIMAT0000522	Agap1	347722	Sequencing	19536157	Unspecified
mmu-mir-297a-5p	MIMAT0000375	Agfg1	15463	Sequencing	19536157	Unspecified
mmu-mir-297a-5p	MIMAT0000375	Ago1	236511	Sequencing	19536157	Unspecified
mmu-let-7b-5p	MIMAT0000522	Ago3	214150	Sequencing	19536157	Unspecified
mmu-mir-297a-5p	MIMAT0000375	D630045J12Rik	330286	HITS-CLIP	21258322	Unspecified
mmu-mir-297a-5p	MIMAT0000375	D630045J12Rik	330286	HITS-CLIP	23597149	Unspecified
mmu-mir-297a-5p	MIMAT0000375	D630045J12Rik	330286	HITS-CLIP	25083871	Unspecified
mmu-mir-297a-5p	MIMAT0000375	D630045J12Rik	330286	HITS-CLIP	19536157	Unspecified
mmu-let-7b-5p	MIMAT0000522	D630045J12Rik	330286	Sequencing	19536157	Unspecified
mmu-mir-1192	MIMAT0005850	D730039F16Rik	77996	HITS-CLIP	25083871	Unspecified
mmu-let-7b-5p	MIMAT0000522	AI464131	329828	Sequencing	19536157	Unspecified
mmu-mir-181b-5p	MIMAT0000673	Aicda	11628	Luciferase assay//Microarray//qRT-PCR//Western blot	18762567	Unspecified
mmu-mir-1192	MIMAT0005850	Nlgn2	216856	HITS-CLIP	25083871	Unspecified
mmu-mir-1192	MIMAT0005850	Nlgn2	216856	HITS-CLIP	21258322	Unspecified
mmu-mir-1192	MIMAT0005850	Ajuba	16475	HITS-CLIP	21258322	Unspecified
mmu-mir-674-5p	MIMAT0003740	AK010878	100233175	HITS-CLIP	21258322	Unspecified
mmu-mir-181b-5p	MIMAT0000673	Ak4	11639	Microarray	18762567	Unspecified
mmu-mir-297a-5p	MIMAT0000375	Akap2	11641	HITS-CLIP	23597149	Unspecified
mmu-let-7b-5p	MIMAT0000522	Ddn	13199	Sequencing	19536157	Unspecified
mmu-mir-297a-5p	MIMAT0000375	Akap9	100986	Sequencing	19536157	Unspecified
mmu-mir-103-3p	MIMAT0000546	Ddx19b	234733	HITS-CLIP	23597149	Unspecified
mmu-let-7b-5p	MIMAT0000522	Akt1	11651	Sequencing	19536157	Unspecified
mmu-mir-29b-3p	MIMAT0000127	Akt3	23797	Luciferase assay//qRT-PCR//Western blot	23764849	Unspecified
mmu-mir-29c-3p	MIMAT0000536	Akt3	23797	Luciferase assay//qRT-PCR//Western blot	23764849	Unspecified
mmu-let-7b-5p	MIMAT0000522	Nr6a1	14536	Sequencing	19536157	Unspecified
mmu-mir-297a-5p	MIMAT0000375	Amigo1	229715	Sequencing	19536157	Unspecified
mmu-let-7b-5p	MIMAT0000522	Igdcc3	19289	Sequencing	19536157	Unspecified
mmu-let-7b-5p	MIMAT0000522	Igdcc4	56741	Sequencing	19536157	Unspecified
mmu-mir-297a-5p	MIMAT0000375	Ank3	11735	Sequencing	19536157	Unspecified
mmu-mir-297a-5p	MIMAT0000375	Ankrd12	106585	Sequencing	19536157	Unspecified
mmu-mir-297a-5p	MIMAT0000375	Ankrd28	105522	Sequencing	19536157	Unspecified
mmu-mir-1192	MIMAT0005850	Ankrd29	225187	HITS-CLIP	23142080	Unspecified
mmu-let-7b-5p	MIMAT0000522	Ankrd52	237615	Sequencing	19536157	Unspecified
mmu-mir-674-5p	MIMAT0003740	Anks1b	77531	HITS-CLIP	23142080	Unspecified
mmu-let-7b-5p	MIMAT0000522	Dlc1	50768	Sequencing	19536157	Unspecified
mmu-mir-181b-5p	MIMAT0000673	Ap1g1	11765	HITS-CLIP	25083871	Unspecified
mmu-mir-692	MIMAT0003471	Dmrta2	242620	HITS-CLIP	23142080	Unspecified
mmu-let-7b-5p	MIMAT0000522	Apba1	319924	Sequencing	19536157	Unspecified
mmu-let-7b-5p	MIMAT0000522	Apc2	23805	HITS-CLIP	25083871	Unspecified
mmu-let-7b-5p	MIMAT0000522	Apc2	23805	HITS-CLIP	23142080	Unspecified
mmu-let-7b-5p	MIMAT0000522	Apc2	23805	HITS-CLIP	21258322	Unspecified
mmu-let-7c-5p	MIMAT0000523	Apc2	23805	HITS-CLIP	25083871	Unspecified
mmu-let-7c-5p	MIMAT0000523	Apc2	23805	HITS-CLIP	21258322	Unspecified
mmu-let-7c-5p	MIMAT0000523	Apc2	23805	HITS-CLIP	23142080	Unspecified
mmu-let-7b-5p	MIMAT0000522	Dnajc27	217378	Sequencing	19536157	Unspecified
mmu-mir-5113	MIMAT0020621	Dnajc27	217378	HITS-CLIP	25083871	Unspecified
mmu-let-7b-5p	MIMAT0000522	Dnm3	103967	Sequencing	19536157	Unspecified
mmu-mir-297a-5p	MIMAT0000375	Dnm3	103967	Sequencing	19536157	Unspecified
mmu-mir-297a-5p	MIMAT0000375	Dnm3	103967	HITS-CLIP	25083871	Unspecified
mmu-mir-29b-3p	MIMAT0000127	Dnmt3a	13435	Luciferase assay//mRAP//Northern blot	19509302	Unspecified
mmu-mir-29b-3p	MIMAT0000127	Dnmt3a	13435	qRT-PCR//Western blot	19959559	Unspecified
mmu-mir-29b-3p	MIMAT0000127	Dnmt3b	13436	qRT-PCR//Western blot	19959559	Unspecified
mmu-mir-29b-3p	MIMAT0000127	Dnmt3b	13436	Luciferase assay//mRAP//Northern blot	19509302	Unspecified
mmu-let-7b-5p	MIMAT0000522	Arc	11838	Sequencing	19536157	Unspecified
mmu-mir-297a-5p	MIMAT0000375	Arf2	11841	Sequencing	19536157	Unspecified
mmu-mir-1192	MIMAT0005850	Arfip1	99889	HITS-CLIP	25083871	Unspecified
mmu-let-7b-5p	MIMAT0000522	Arhgap1	228359	Sequencing	19536157	Unspecified
mmu-mir-29c-3p	MIMAT0000536	Insig1	231070	Reporter assay	17652184	Unspecified
mmu-mir-3076-5p	MIMAT0014860	Arhgap32	330914	HITS-CLIP	25083871	Unspecified
mmu-let-7b-5p	MIMAT0000522	Dusp1	19252	Sequencing	19536157	Unspecified
mmu-mir-692	MIMAT0003471	Arid3a	13496	HITS-CLIP	21258322	Unspecified
mmu-let-7b-5p	MIMAT0000522	Arid3b	56380	Sequencing	19536157	Unspecified
mmu-mir-664-3p	MIMAT0012774	Arid4b	94246	HITS-CLIP	25083871	Unspecified
mmu-let-7b-5p	MIMAT0000522	Arl5a	75423	Sequencing	19536157	Unspecified
mmu-let-7b-5p	MIMAT0000522	Itga4	16401	Sequencing	19536157	Unspecified
mmu-let-7b-5p	MIMAT0000522	Arpp19	59046	Sequencing	19536157	Unspecified
mmu-let-7b-5p	MIMAT0000522	Arpp21	74100	Sequencing	19536157	Unspecified
mmu-mir-297a-5p	MIMAT0000375	Arrb1	109689	Sequencing	19536157	Unspecified
mmu-let-7b-5p	MIMAT0000522	Arrdc3	105171	Sequencing	19536157	Unspecified
mmu-mir-1192	MIMAT0005850	Edem3	66967	HITS-CLIP	25083871	Unspecified
mmu-mir-297a-5p	MIMAT0000375	Asb7	117589	HITS-CLIP	23597149	Unspecified
mmu-mir-692	MIMAT0003471	Ash1l	192195	HITS-CLIP	21258322	Unspecified
mmu-mir-692	MIMAT0003471	Asic1	11419	HITS-CLIP	25083871	Unspecified
mmu-mir-692	MIMAT0003471	Asic1	11419	HITS-CLIP	23597149	Unspecified
mmu-mir-568	MIMAT0004892	Asxl2	75302	HITS-CLIP	21258322	Unspecified
mmu-mir-568	MIMAT0004892	Asxl2	75302	HITS-CLIP	25083871	Unspecified
mmu-mir-674-5p	MIMAT0003740	Asxl2	75302	HITS-CLIP	21258322	Unspecified
mmu-mir-297a-5p	MIMAT0000375	Kcnc1	16502	Sequencing	19536157	Unspecified
mmu-mir-664-3p	MIMAT0012774	Atl2	56298	HITS-CLIP	25083871	Unspecified
mmu-mir-664-3p	MIMAT0012774	Atl2	56298	HITS-CLIP	23597149	Unspecified
mmu-let-7b-5p	MIMAT0000522	Atp2a2	11938	Sequencing	19536157	Unspecified
mmu-mir-181b-5p	MIMAT0000673	Atp2a2	11938	HITS-CLIP	25083871	Unspecified
mmu-mir-664-3p	MIMAT0012774	Atp2a2	11938	HITS-CLIP	25083871	Unspecified
mmu-let-7b-5p	MIMAT0000522	Atp2b2	11941	HITS-CLIP	21258322	Unspecified
mmu-let-7b-5p	MIMAT0000522	Atp2b2	11941	Sequencing	19536157	Unspecified
mmu-let-7c-5p	MIMAT0000523	Atp2b2	11941	HITS-CLIP	21258322	Unspecified
mmu-mir-181b-5p	MIMAT0000673	Atp5g1	11951	Microarray	18762567	Unspecified
mmu-let-7b-5p	MIMAT0000522	Atp6v1b2	11966	Sequencing	19536157	Unspecified
mmu-mir-297a-5p	MIMAT0000375	Atp8b2	54667	Sequencing	19536157	Unspecified
mmu-mir-692	MIMAT0003471	Elovl6	170439	HITS-CLIP	23597149	Unspecified
mmu-mir-297a-5p	MIMAT0000375	Atrn	11990	Sequencing	19536157	Unspecified
mmu-mir-674-5p	MIMAT0003740	Atrn	11990	HITS-CLIP	21258322	Unspecified
mmu-mir-1192	MIMAT0005850	Kif1c	16562	HITS-CLIP	25083871	Unspecified
mmu-mir-297a-5p	MIMAT0000375	Azin1	54375	Sequencing	19536157	Unspecified
mmu-mir-568	MIMAT0004892	B2m	12010	HITS-CLIP	23142080	Unspecified
mmu-let-7b-5p	MIMAT0000522	Epb4.1l1	13821	Sequencing	19536157	Unspecified
mmu-mir-297a-5p	MIMAT0000375	Epb4.1l1	13821	Sequencing	19536157	Unspecified
mmu-let-7b-5p	MIMAT0000522	Epb4.1l5	226352	Sequencing	19536157	Unspecified
mmu-let-7b-5p	MIMAT0000522	Kifc2	16581	Sequencing	19536157	Unspecified
mmu-let-7b-5p	MIMAT0000522	Slc8a2	110891	Sequencing	19536157	Unspecified
mmu-let-7b-5p	MIMAT0000522	Epha4	13838	Sequencing	19536157	Unspecified
mmu-mir-297a-5p	MIMAT0000375	B4galt6	56386	Sequencing	19536157	Unspecified
mmu-mir-29b-3p	MIMAT0000127	Bace1	23821	Luciferase assay//qRT-PCR//Western blot	22664922	Unspecified
mmu-let-7b-5p	MIMAT0000522	Bach1	12013	Sequencing	19536157	Unspecified
mmu-mir-674-5p	MIMAT0003740	Bach2	12014	HITS-CLIP	25083871	Unspecified
mmu-let-7b-5p	MIMAT0000522	Bahcc1	268515	Sequencing	19536157	Unspecified
mmu-mir-29b-3p	MIMAT0000127	Eps15	13858	HITS-CLIP	21258322	Unspecified
mmu-mir-29c-3p	MIMAT0000536	Eps15	13858	HITS-CLIP	21258322	Unspecified
mmu-mir-29b-3p	MIMAT0000127	Bak1	12018	Luciferase assay//Microarray//qRT-PCR//Western blot	21245165	Unspecified
mmu-mir-29b-3p	MIMAT0000127	Bbc3	170770	Luciferase assay//Microarray//qRT-PCR//Western blot	21245165	Unspecified
mmu-mir-1192	MIMAT0005850	Knop1	66356	HITS-CLIP	21258322	Unspecified
mmu-let-7b-5p	MIMAT0000522	Kpna1	16646	Sequencing	19536157	Unspecified
mmu-mir-181b-5p	MIMAT0000673	Errfi1	74155	Microarray	18762567	Unspecified
mmu-let-7b-5p	MIMAT0000522	Esam	69524	Sequencing	19536157	Unspecified
mmu-mir-297a-5p	MIMAT0000375	Etv3	27049	HITS-CLIP	25083871	Unspecified
mmu-mir-568	MIMAT0004892	Etv3	27049	HITS-CLIP	25083871	Unspecified
mmu-mir-29b-3p	MIMAT0000127	Bcl2l11	12125	Luciferase assay//Microarray//qRT-PCR//Western blot	21245165	Unspecified
mmu-let-7b-5p	MIMAT0000522	Bcl7c	12055	Sequencing	19536157	Unspecified
mmu-mir-692	MIMAT0003471	Bdp1	544971	HITS-CLIP	23142080	Unspecified
mmu-mir-29b-3p	MIMAT0000127	Bicd1	12121	HITS-CLIP	23597149	Unspecified
mmu-mir-29b-3p	MIMAT0000127	Bicd1	12121	HITS-CLIP	19536157	Unspecified
mmu-mir-29c-3p	MIMAT0000536	Bicd1	12121	HITS-CLIP	19536157	Unspecified
mmu-mir-29c-3p	MIMAT0000536	Bicd1	12121	HITS-CLIP	23597149	Unspecified
mmu-mir-29b-3p	MIMAT0000127	Bmf	171543	Luciferase assay//Microarray//qRT-PCR//Western blot	21245165	Unspecified
mmu-mir-200b-3p	MIMAT0000233	Bmi1	12151	Immunofluorescence//In situ hybridization//Luciferase assay//Western blot	20832727	Unspecified
mmu-mir-297a-5p	MIMAT0000375	Bmp2k	140780	Sequencing	19536157	Unspecified
mmu-let-7b-5p	MIMAT0000522	Bmpr1a	12166	Sequencing	19536157	Unspecified
mmu-mir-692	MIMAT0003471	Plekha2	83436	HITS-CLIP	21258322	Unspecified
mmu-mir-692	MIMAT0003471	Plekha2	83436	HITS-CLIP	23597149	Unspecified
mmu-let-7b-5p	MIMAT0000522	Braf	109880	Sequencing	19536157	Unspecified
mmu-mir-1192	MIMAT0005850	Bri3bp	76809	HITS-CLIP	25083871	Unspecified
mmu-mir-200b-3p	MIMAT0000233	Bri3bp	76809	HITS-CLIP	21258322	Unspecified
mmu-mir-674-5p	MIMAT0003740	Brip1	237911	HITS-CLIP	21258322	Unspecified
mmu-mir-297a-5p	MIMAT0000375	Brwd1	93871	Sequencing	19536157	Unspecified
mmu-let-7b-5p	MIMAT0000522	Bsg	12215	Sequencing	19536157	Unspecified
mmu-let-7b-5p	MIMAT0000522	Bsg	12215	Luciferase assay//Western blot	21087605	Unspecified
mmu-let-7b-5p	MIMAT0000522	Lnp	69605	Sequencing	19536157	Unspecified
mmu-let-7b-5p	MIMAT0000522	Btbd3	228662	Sequencing	19536157	Unspecified
mmu-mir-674-5p	MIMAT0003740	Bzrap1	207777	HITS-CLIP	25083871	Unspecified
mmu-mir-297a-5p	MIMAT0000375	C030046E11Rik	226089	Sequencing	19536157	Unspecified
mmu-mir-1192	MIMAT0005850	Lpp	210126	HITS-CLIP	25083871	Unspecified
mmu-mir-297a-5p	MIMAT0000375	Cab39	12283	Sequencing	19536157	Unspecified
mmu-let-7b-5p	MIMAT0000522	Cacna1e	12290	Sequencing	19536157	Unspecified
mmu-let-7b-5p	MIMAT0000522	Cadm2	239857	Sequencing	19536157	Unspecified
mmu-mir-297a-5p	MIMAT0000375	Ppm1l	242083	Sequencing	19536157	Unspecified
mmu-let-7b-5p	MIMAT0000522	Ppme1	72590	Sequencing	19536157	Unspecified
mmu-mir-29b-3p	MIMAT0000127	Fbn1	14118	Luciferase assay//Microarray//Northern blot//qRT-PCR	18723672	Unspecified
mmu-let-7b-5p	MIMAT0000522	Cald1	109624	Sequencing	19536157	Unspecified
mmu-mir-297a-5p	MIMAT0000375	Camk1d	227541	HITS-CLIP	23597149	Unspecified
mmu-mir-297a-5p	MIMAT0000375	Camk1d	227541	HITS-CLIP	25083871	Unspecified
mmu-let-7b-5p	MIMAT0000522	Ppp3r1	19058	Sequencing	19536157	Unspecified
mmu-mir-1192	MIMAT0005850	Camsap2	67886	HITS-CLIP	25083871	Unspecified
mmu-mir-297a-5p	MIMAT0000375	Camta2	216874	Sequencing	19536157	Unspecified
mmu-mir-297a-5p	MIMAT0000375	Cap2	67252	Sequencing	19536157	Unspecified
mmu-mir-297a-5p	MIMAT0000375	Capn2	12334	Sequencing	19536157	Unspecified
mmu-let-7b-5p	MIMAT0000522	Capns1	12336	Sequencing	19536157	Unspecified
mmu-mir-181b-5p	MIMAT0000673	Stk32a	269019	HITS-CLIP	25083871	Unspecified
mmu-mir-1192	MIMAT0005850	Preb	50907	HITS-CLIP	25083871	Unspecified
mmu-let-7b-5p	MIMAT0000522	Car2	12349	Sequencing	19536157	Unspecified
mmu-mir-674-5p	MIMAT0003740	Casc4	319996	HITS-CLIP	21258322	Unspecified
mmu-mir-674-5p	MIMAT0003740	Casc4	319996	HITS-CLIP	23597149	Unspecified
mmu-mir-181b-5p	MIMAT0000673	Casp3	12367	Microarray	18762567	Unspecified
mmu-mir-297a-5p	MIMAT0000375	Fgf11	14166	Sequencing	19536157	Unspecified
mmu-mir-1192	MIMAT0005850	Fgfr1	14182	HITS-CLIP	21258322	Unspecified
mmu-mir-133a-3p	MIMAT0000145	Casp9	12371	Luciferase assay	17715156	Unspecified
mmu-let-7b-5p	MIMAT0000522	Brinp1	56710	Sequencing	19536157	Unspecified
mmu-let-7b-5p	MIMAT0000522	Cat	12359	Sequencing	19536157	Unspecified
mmu-mir-297a-5p	MIMAT0000375	Cav1	12389	Sequencing	19536157	Unspecified
mmu-mir-297a-5p	MIMAT0000375	Cav2	12390	Sequencing	19536157	Unspecified
mmu-mir-29b-3p	MIMAT0000127	Cav2	12390	Reporter assay	17652184	Unspecified
mmu-mir-29c-3p	MIMAT0000536	Cav2	12390	Reporter assay	17652184	Unspecified
mmu-mir-297a-5p	MIMAT0000375	Cbln3	56410	Sequencing	19536157	Unspecified
mmu-let-7b-5p	MIMAT0000522	Cbx5	12419	Sequencing	19536157	Unspecified
mmu-mir-181b-5p	MIMAT0000673	Cbx7	52609	ChIP-seq//Luciferase assay	22226354	Unspecified
mmu-mir-297a-5p	MIMAT0000375	Fmn1	14260	Sequencing	19536157	Unspecified
mmu-let-7b-5p	MIMAT0000522	Fmn2	54418	Sequencing	19536157	Unspecified
mmu-mir-297a-5p	MIMAT0000375	Fmn2	54418	Sequencing	19536157	Unspecified
mmu-let-7b-5p	MIMAT0000522	Ccdc127	67433	Sequencing	19536157	Unspecified
mmu-mir-297a-5p	MIMAT0000375	Ccdc127	67433	HITS-CLIP	21258322	Unspecified
mmu-mir-297a-5p	MIMAT0000375	Ccdc127	67433	Sequencing	19536157	Unspecified
mmu-let-7b-5p	MIMAT0000522	Fndc3a	319448	Sequencing	19536157	Unspecified
mmu-let-7b-5p	MIMAT0000522	Fnip1	216742	Sequencing	19536157	Unspecified
mmu-mir-692	MIMAT0003471	Fnip1	216742	HITS-CLIP	23142080	Unspecified
mmu-let-7b-5p	MIMAT0000522	Fnip2	329679	Sequencing	19536157	Unspecified
mmu-mir-674-5p	MIMAT0003740	Ccdc25	67179	HITS-CLIP	23597149	Unspecified
mmu-mir-674-5p	MIMAT0003740	Ccdc25	67179	HITS-CLIP	23142080	Unspecified
mmu-mir-674-5p	MIMAT0003740	Ccdc25	67179	HITS-CLIP	21258322	Unspecified
mmu-mir-674-5p	MIMAT0003740	Ccdc25	67179	HITS-CLIP	25083871	Unspecified
mmu-let-7b-5p	MIMAT0000522	Map4k3	225028	Sequencing	19536157	Unspecified
mmu-mir-297a-5p	MIMAT0000375	Ccdc47	67163	Sequencing	19536157	Unspecified
mmu-mir-181b-5p	MIMAT0000673	Ccdc58	381045	Microarray	18762567	Unspecified
mmu-mir-297a-5p	MIMAT0000375	Foxj1	15223	Sequencing	19536157	Unspecified
mmu-mir-181b-5p	MIMAT0000673	H2-D1	14964	HITS-CLIP	21258322	Unspecified
mmu-mir-181b-5p	MIMAT0000673	H2-D1	14980	HITS-CLIP	21258322	Unspecified
mmu-mir-200b-3p	MIMAT0000233	Foxn3	71375	HITS-CLIP	23142080	Unspecified
mmu-mir-297a-5p	MIMAT0000375	Ccnc	51813	Sequencing	19536157	Unspecified
mmu-let-7b-5p	MIMAT0000522	Ccnd1	12443	Sequencing	19536157	Unspecified
mmu-mir-692	MIMAT0003471	Ccnd1	12443	HITS-CLIP	21258322	Unspecified
mmu-mir-133a-3p	MIMAT0000145	Ccnd2	12444	Luciferase assay//Western blot	20056941	Unspecified
mmu-mir-5113	MIMAT0020621	Ccnd2	12444	HITS-CLIP	25083871	Unspecified
mmu-mir-297a-5p	MIMAT0000375	Ccnt2	72949	Sequencing	19536157	Unspecified
mmu-let-7b-5p	MIMAT0000522	2009-03-01	216438	Sequencing	19536157	Unspecified
mmu-let-7b-5p	MIMAT0000522	Fras1	231470	Sequencing	19536157	Unspecified
mmu-mir-297a-5p	MIMAT0000375	Fras1	231470	Sequencing	19536157	Unspecified
mmu-mir-568	MIMAT0004892	Pten	19211	HITS-CLIP	25083871	Unspecified
mmu-let-7b-5p	MIMAT0000522	Mast2	17776	Sequencing	19536157	Unspecified
mmu-let-7b-5p	MIMAT0000522	Ctsb	13030	Sequencing	19536157	Unspecified
mmu-mir-297a-5p	MIMAT0000375	Cct2	12461	Sequencing	19536157	Unspecified
mmu-let-7b-5p	MIMAT0000522	Cd164	53599	Sequencing	19536157	Unspecified
mmu-let-7b-5p	MIMAT0000522	Frmd5	228564	Sequencing	19536157	Unspecified
mmu-mir-568	MIMAT0004892	Frmpd4	333605	HITS-CLIP	25083871	Unspecified
mmu-mir-181b-5p	MIMAT0000673	Cd244	18106	Microarray	18762567	Unspecified
mmu-let-7b-5p	MIMAT0000522	Hdx	245596	Sequencing	19536157	Unspecified
mmu-mir-1192	MIMAT0005850	Hdx	245596	HITS-CLIP	25083871	Unspecified
mmu-mir-674-5p	MIMAT0003740	Mbp	17196	HITS-CLIP	25083871	Unspecified
mmu-mir-674-5p	MIMAT0003740	Mbp	17196	HITS-CLIP	21258322	Unspecified
mmu-let-7b-5p	MIMAT0000522	Tbc1d24	18209	Sequencing	19536157	Unspecified
mmu-mir-297a-5p	MIMAT0000375	Fut9	14348	Sequencing	19536157	Unspecified
mmu-mir-297a-5p	MIMAT0000375	Fzd1	14362	Sequencing	19536157	Unspecified
mmu-mir-297a-5p	MIMAT0000375	Ptprr	19279	Sequencing	19536157	Unspecified
mmu-mir-692	MIMAT0003471	Cdadc1	71891	HITS-CLIP	23142080	Unspecified
mmu-mir-692	MIMAT0003471	Gabpb2	213054	HITS-CLIP	21258322	Unspecified
mmu-mir-664-3p	MIMAT0012774	Cdc27	217232	HITS-CLIP	25083871	Unspecified
mmu-mir-692	MIMAT0003471	Cdc27	217232	HITS-CLIP	25083871	Unspecified
mmu-mir-133a-3p	MIMAT0000145	Cdc42	12540	Luciferase assay//Microarray//Northern blot//Western blot	17468766	Unspecified
mmu-mir-133a-3p	MIMAT0000145	Cdc42	12540	Luciferase assay//Western blot	20056941	Unspecified
mmu-mir-297a-5p	MIMAT0000375	Cdh11	12552	Sequencing	19536157	Unspecified
mmu-mir-297a-5p	MIMAT0000375	Cdh12	215654	HITS-CLIP	23597149	Unspecified
mmu-mir-297a-5p	MIMAT0000375	Cdh7	241201	Sequencing	19536157	Unspecified
mmu-mir-297a-5p	MIMAT0000375	Megf9	230316	Sequencing	19536157	Unspecified
mmu-mir-297a-5p	MIMAT0000375	Galnt3	14425	Sequencing	19536157	Unspecified
mmu-mir-1192	MIMAT0005850	Cdkn1b	12576	HITS-CLIP	23142080	Unspecified
mmu-mir-1192	MIMAT0005850	Hnrnpul2	68693	HITS-CLIP	25083871	Unspecified
mmu-let-7b-5p	MIMAT0000522	Cdr2l	237988	Sequencing	19536157	Unspecified
mmu-mir-692	MIMAT0003471	Gda	14544	HITS-CLIP	25083871	Unspecified
mmu-mir-692	MIMAT0003471	Gda	14544	HITS-CLIP	26203562	Unspecified
mmu-mir-692	MIMAT0003471	Gda	14544	HITS-CLIP	23597149	Unspecified
mmu-mir-692	MIMAT0003471	Gda	14544	HITS-CLIP	19536157	Unspecified
mmu-mir-23b-3p	MIMAT0000125	Celf1	13046	Luciferase assay//qRT-PCR//Western blot	20299448	Unspecified
mmu-mir-297a-5p	MIMAT0000375	Celf1	13046	Sequencing	19536157	Unspecified
mmu-mir-23b-3p	MIMAT0000125	Celf2	14007	Luciferase assay//qRT-PCR//Western blot	20299448	Unspecified
mmu-mir-297a-5p	MIMAT0000375	Celf2	14007	Sequencing	19536157	Unspecified
mmu-let-7b-5p	MIMAT0000522	Celf5	319586	Sequencing	19536157	Unspecified
mmu-let-7b-5p	MIMAT0000522	Cep120	225523	Sequencing	19536157	Unspecified
mmu-let-7b-5p	MIMAT0000522	Gga3	260302	Sequencing	19536157	Unspecified
mmu-mir-297a-5p	MIMAT0000375	Cfl2	12632	Sequencing	19536157	Unspecified
mmu-mir-1192	MIMAT0005850	Cflar	12633	HITS-CLIP	21258322	Unspecified
mmu-mir-674-5p	MIMAT0003740	Cflar	12633	HITS-CLIP	21258322	Unspecified
mmu-let-7b-5p	MIMAT0000522	Chd3	216848	Sequencing	19536157	Unspecified
mmu-let-7b-5p	MIMAT0000522	Chd7	320790	Sequencing	19536157	Unspecified
mmu-mir-297a-5p	MIMAT0000375	Chd7	320790	Sequencing	19536157	Unspecified
mmu-let-7b-5p	MIMAT0000522	Chd9	109151	Sequencing	19536157	Unspecified
mmu-mir-1192	MIMAT0005850	Denr	68184	HITS-CLIP	21258322	Unspecified
mmu-mir-1192	MIMAT0005850	Chl1	12661	HITS-CLIP	25083871	Unspecified
mmu-mir-297a-5p	MIMAT0000375	Gltp	56356	Sequencing	19536157	Unspecified
mmu-mir-297a-5p	MIMAT0000375	Chp1	56398	Sequencing	19536157	Unspecified
mmu-let-7b-5p	MIMAT0000522	Rbm33	381626	Sequencing	19536157	Unspecified
mmu-mir-692	MIMAT0003471	Mpv17	17527	HITS-CLIP	21258322	Unspecified
mmu-mir-297a-5p	MIMAT0000375	Mpv17l	93734	Sequencing	19536157	Unspecified
mmu-mir-297a-5p	MIMAT0000375	Chsy1	269941	Sequencing	19536157	Unspecified
mmu-mir-1192	MIMAT0005850	Igsf3	78908	HITS-CLIP	25083871	Unspecified
mmu-let-7b-5p	MIMAT0000522	Cldn12	64945	Sequencing	19536157	Unspecified
mmu-mir-1192	MIMAT0005850	Hist1h2bq	665596	HITS-CLIP	21258322	Unspecified
mmu-mir-297a-5p	MIMAT0000375	Clk1	12747	Sequencing	19536157	Unspecified
mmu-mir-181b-5p	MIMAT0000673	Clmn	94040	HITS-CLIP	21258322	Unspecified
mmu-mir-297a-5p	MIMAT0000375	Cltc	67300	Sequencing	19536157	Unspecified
mmu-let-7b-5p	MIMAT0000522	Dnajc1	13418	Sequencing	19536157	Unspecified
mmu-let-7b-5p	MIMAT0000522	Msi2	76626	Sequencing	19536157	Unspecified
mmu-let-7b-5p	MIMAT0000522	Msi2	76626	HITS-CLIP	25083871	Unspecified
mmu-let-7c-5p	MIMAT0000523	Msi2	76626	HITS-CLIP	25083871	Unspecified
mmu-mir-297a-5p	MIMAT0000375	Cnih3	72978	HITS-CLIP	23597149	Unspecified
mmu-mir-297a-5p	MIMAT0000375	Cnih3	72978	HITS-CLIP	25083871	Unspecified
mmu-let-7b-5p	MIMAT0000522	Cnih4	98417	Sequencing	19536157	Unspecified
mmu-mir-1192	MIMAT0005850	Cnnm3	94218	HITS-CLIP	25083871	Unspecified
mmu-let-7b-5p	MIMAT0000522	Cnr1	12801	Sequencing	19536157	Unspecified
mmu-let-7b-5p	MIMAT0000522	Cntn2	21367	Sequencing	19536157	Unspecified
mmu-mir-29b-3p	MIMAT0000127	Col1a1	12842	Luciferase assay//Microarray//Northern blot//qRT-PCR//Western blot	19342382	Unspecified
mmu-mir-29b-3p	MIMAT0000127	Col1a1	12842	Luciferase assay//Microarray//Northern blot//qRT-PCR	18723672	Unspecified
mmu-mir-29b-3p	MIMAT0000127	Col1a2	12843	Luciferase assay//Microarray//Northern blot//qRT-PCR	18723672	Unspecified
mmu-mir-29b-3p	MIMAT0000127	Col2a1	12824	Luciferase assay	21665270	Unspecified
mmu-mir-29b-3p	MIMAT0000127	Col3a1	12825	Luciferase assay//Microarray//Northern blot//qRT-PCR	18723672	Unspecified
mmu-mir-29b-3p	MIMAT0000127	Col4a1	12826	Luciferase assay//qRT-PCR//Western blot	23139829	Unspecified
mmu-let-7b-5p	MIMAT0000522	Col4a2	12827	Sequencing	19536157	Unspecified
mmu-mir-29b-3p	MIMAT0000127	Col4a2	12827	Luciferase assay//qRT-PCR//Western blot	23139829	Unspecified
mmu-mir-29b-3p	MIMAT0000127	Col4a2	12827	Luciferase assay//Microarray//Northern blot//qRT-PCR//Western blot	19342382	Unspecified
mmu-let-7b-5p	MIMAT0000522	Gpcpd1	74182	Sequencing	19536157	Unspecified
mmu-mir-29b-3p	MIMAT0000127	Col5a3	53867	Luciferase assay//Microarray//Northern blot//qRT-PCR//Western blot	19342382	Unspecified
mmu-mir-103-3p	MIMAT0000546	Gpd1	14555	Reporter assay	15131085	Unspecified
mmu-mir-181b-5p	MIMAT0000673	Gpd1l	333433	HITS-CLIP	21258322	Unspecified
mmu-mir-1192	MIMAT0005850	Gpr107	277463	HITS-CLIP	25083871	Unspecified
mmu-mir-297a-5p	MIMAT0000375	Mxi1	17859	Sequencing	19536157	Unspecified
mmu-mir-181b-5p	MIMAT0000673	Mxi1	17859	Microarray	18762567	Unspecified
mmu-let-7b-5p	MIMAT0000522	Mycbp	56309	Sequencing	19536157	Unspecified
mmu-let-7c-5p	MIMAT0000523	Mycn	18109	Luciferase assay//Microarray//qRT-PCR//Western blot//Immunohistochemistry	20054295	Unspecified
mmu-mir-692	MIMAT0003471	Gpr158	241263	HITS-CLIP	25083871	Unspecified
mmu-let-7b-5p	MIMAT0000522	Cpeb2	231207	Sequencing	19536157	Unspecified
mmu-mir-1192	MIMAT0005850	Cpeb3	208922	HITS-CLIP	25083871	Unspecified
mmu-mir-1192	MIMAT0005850	Cpeb3	208922	HITS-CLIP	23142080	Unspecified
mmu-let-7b-5p	MIMAT0000522	Cpeb4	67579	Sequencing	19536157	Unspecified
mmu-mir-297a-5p	MIMAT0000375	Cplx2	12890	Sequencing	19536157	Unspecified
mmu-let-7b-5p	MIMAT0000522	Gramd1b	235283	Sequencing	19536157	Unspecified
mmu-let-7b-5p	MIMAT0000522	Greb1l	381157	Sequencing	19536157	Unspecified
mmu-let-7b-5p	MIMAT0000522	Gria3	53623	Sequencing	19536157	Unspecified
mmu-let-7b-5p	MIMAT0000522	Crem	12916	Sequencing	19536157	Unspecified
mmu-let-7b-5p	MIMAT0000522	Crk	12928	Sequencing	19536157	Unspecified
mmu-mir-5113	MIMAT0020621	Crkl	12929	HITS-CLIP	21258322	Unspecified
mmu-mir-692	MIMAT0003471	Cry2	12953	HITS-CLIP	21258322	Unspecified
mmu-mir-297a-5p	MIMAT0000375	Grm5	108071	Sequencing	19536157	Unspecified
mmu-mir-1192	MIMAT0005850	Gskip	66787	HITS-CLIP	25083871	Unspecified
mmu-let-7b-5p	MIMAT0000522	Csrnp2	207785	Sequencing	19536157	Unspecified
mmu-let-7b-5p	MIMAT0000522	Gxylt1	223827	Sequencing	19536157	Unspecified
mmu-mir-23b-3p	MIMAT0000125	Rtl1	353326	Immunoprecipitaion//Luciferase assay//qRT-PCR//Western blot//Real time qRT-PCR	18716031	Unspecified
mmu-mir-29b-3p	MIMAT0000127	Ctnnbip1	67087	Luciferase assay//Microarray//Northern blot//qRT-PCR//Western blot	19342382	Unspecified
mmu-mir-297a-5p	MIMAT0000375	Ncoa2	17978	Sequencing	19536157	Unspecified
mmu-mir-297a-5p	MIMAT0000375	Elovl2	54326	Sequencing	19536157	Unspecified
mmu-mir-297a-5p	MIMAT0000375	Haus2	66296	Sequencing	19536157	Unspecified
mmu-let-7b-5p	MIMAT0000522	Ndst3	83398	Sequencing	19536157	Unspecified
mmu-mir-29b-3p	MIMAT0000127	Hdac4	208727	Luciferase assay//Microarray//Northern blot//qRT-PCR//Western blot	19342382	Unspecified
mmu-mir-29c-3p	MIMAT0000536	Hdac4	208727	Luciferase assay//qRT-PCR//Western blot	21324893	Unspecified
mmu-let-7b-5p	MIMAT0000522	Hdgfrp3	29877	Sequencing	19536157	Unspecified
mmu-mir-664-3p	MIMAT0012774	Heca	380629	HITS-CLIP	25083871	Unspecified
mmu-mir-297a-5p	MIMAT0000375	Hecw1	94253	HITS-CLIP	25083871	Unspecified
mmu-mir-664-3p	MIMAT0012774	Cyp19a1	13075	HITS-CLIP	25083871	Unspecified
mmu-mir-23b-3p	MIMAT0000125	Hes1	15205	Western blot	14510471	Unspecified
mmu-mir-23b-3p	MIMAT0000125	Hes1	15205	Luciferase assay	17150554	Unspecified
mmu-let-7b-5p	MIMAT0000522	Nf2	18016	Sequencing	19536157	Unspecified
mmu-let-7b-5p	MIMAT0000522	Nf2	18016	HITS-CLIP	25083871	Unspecified
mmu-let-7c-5p	MIMAT0000523	Nf2	18016	HITS-CLIP	25083871	Unspecified
mmu-let-7c-5p	MIMAT0000523	Nf2	18016	HITS-CLIP	23597149	Unspecified
mmu-let-7b-5p	MIMAT0000522	Hic2	58180	Sequencing	19536157	Unspecified
mmu-mir-133a-3p	MIMAT0000145	Nfatc4	73181	qRT-PCR//Luciferase assay//Western blot	20173049	Unspecified
mmu-let-7b-5p	MIMAT0000522	Nfxl1	100978	Sequencing	19536157	Unspecified
mmu-mir-1192	MIMAT0005850	D630023F18Rik	98303	HITS-CLIP	25083871	Unspecified
mmu-mir-568	MIMAT0004892	D630023F18Rik	98303	HITS-CLIP	25083871	Unspecified
mmu-mir-1192	MIMAT0005850	Hmgxb4	70823	HITS-CLIP	25083871	Unspecified
mmu-mir-5113	MIMAT0020621	Hmgxb4	70823	HITS-CLIP	25083871	Unspecified
mmu-mir-297a-5p	MIMAT0000375	Nipa2	93790	Sequencing	19536157	Unspecified
mmu-let-7b-5p	MIMAT0000522	Ercc6	319955	Sequencing	19536157	Unspecified
mmu-let-7b-5p	MIMAT0000522	Homer1	26556	Sequencing	19536157	Unspecified
mmu-let-7b-5p	MIMAT0000522	Pigw	70325	Sequencing	19536157	Unspecified
mmu-let-7b-5p	MIMAT0000522	Sema4f	20355	Sequencing	19536157	Unspecified
mmu-mir-200b-3p	MIMAT0000233	Dcx	13193	Western blot	23776576	Unspecified
mmu-let-7b-5p	MIMAT0000522	Nova1	664883	Sequencing	19536157	Unspecified
mmu-mir-23b-3p	MIMAT0000125	Hspa12a	73442	HITS-CLIP	23142080	Unspecified
mmu-mir-1192	MIMAT0005850	Hspa13	110920	HITS-CLIP	21258322	Unspecified
mmu-let-7b-5p	MIMAT0000522	Ddx10	77591	Sequencing	19536157	Unspecified
mmu-mir-297a-5p	MIMAT0000375	2003-09-01	24050	HITS-CLIP	25083871	Unspecified
mmu-mir-1192	MIMAT0005850	Npr3	18162	HITS-CLIP	25083871	Unspecified
mmu-mir-674-5p	MIMAT0003740	Ddx3x	13205	HITS-CLIP	23597149	Unspecified
mmu-mir-297a-5p	MIMAT0000375	Ddx6	13209	HITS-CLIP	25083871	Unspecified
mmu-mir-664-3p	MIMAT0012774	Nr2c1	22025	HITS-CLIP	25083871	Unspecified
mmu-mir-674-5p	MIMAT0003740	Dennd5b	320560	HITS-CLIP	21258322	Unspecified
mmu-let-7b-5p	MIMAT0000522	Ifnar1	15975	HITS-CLIP	21258322	Unspecified
mmu-let-7c-5p	MIMAT0000523	Ifnar1	15975	HITS-CLIP	21258322	Unspecified
mmu-mir-297a-5p	MIMAT0000375	Dhx9	13211	Sequencing	19536157	Unspecified
mmu-mir-692	MIMAT0003471	Diap2	54004	HITS-CLIP	25083871	Unspecified
mmu-mir-692	MIMAT0003471	Diap2	54004	HITS-CLIP	21258322	Unspecified
mmu-mir-297a-5p	MIMAT0000375	Dio2	13371	Sequencing	19536157	Unspecified
mmu-let-7b-5p	MIMAT0000522	Dip2b	239667	Sequencing	19536157	Unspecified
mmu-mir-692	MIMAT0003471	Dip2b	239667	HITS-CLIP	25083871	Unspecified
mmu-mir-3076-5p	MIMAT0014860	Diras2	68203	HITS-CLIP	23597149	Unspecified
mmu-mir-3076-5p	MIMAT0014860	Diras2	68203	HITS-CLIP	25083871	Unspecified
mmu-mir-3076-5p	MIMAT0014860	Diras2	68203	HITS-CLIP	23142080	Unspecified
mmu-mir-3076-5p	MIMAT0014860	Diras2	68203	HITS-CLIP	21258322	Unspecified
mmu-let-7b-5p	MIMAT0000522	Ikbkg	16151	Sequencing	19536157	Unspecified
mmu-mir-297a-5p	MIMAT0000375	Dlg3	53310	Sequencing	19536157	Unspecified
mmu-mir-1192	MIMAT0005850	Nup107	103468	HITS-CLIP	25083871	Unspecified
mmu-let-7b-5p	MIMAT0000522	Usp22	216825	Sequencing	19536157	Unspecified
mmu-let-7b-5p	MIMAT0000522	Dmd	13405	Sequencing	19536157	Unspecified
mmu-mir-568	MIMAT0004892	Dmtn	13829	HITS-CLIP	25083871	Unspecified
mmu-let-7b-5p	MIMAT0000522	Usp47	74996	Sequencing	19536157	Unspecified
mmu-mir-297a-5p	MIMAT0000375	Dnajb4	67035	Sequencing	19536157	Unspecified
mmu-let-7b-5p	MIMAT0000522	Lpgat1	226856	Sequencing	19536157	Unspecified
mmu-mir-29b-3p	MIMAT0000127	Sirt1	93759	Luciferase assay//qRT-PCR//Western blot//immunostaining	24657470	Unspecified
mmu-let-7b-5p	MIMAT0000522	Dnhd1	77505	Sequencing	19536157	Unspecified
mmu-mir-664-3p	MIMAT0012774	Ogdh	18293	HITS-CLIP	25083871	Unspecified
mmu-mir-674-5p	MIMAT0003740	Ogdh	18293	HITS-CLIP	21258322	Unspecified
mmu-mir-674-5p	MIMAT0003740	Ogdh	18293	HITS-CLIP	23597149	Unspecified
mmu-mir-1192	MIMAT0005850	Ppm1k	243382	HITS-CLIP	25083871	Unspecified
mmu-mir-297a-5p	MIMAT0000375	Skiv2l2	72198	Sequencing	19536157	Unspecified
mmu-mir-297a-5p	MIMAT0000375	Vdr	22337	HITS-CLIP	23142080	Unspecified
mmu-mir-297a-5p	MIMAT0000375	Ing3	71777	Sequencing	19536157	Unspecified
mmu-let-7b-5p	MIMAT0000522	Donson	60364	Sequencing	19536157	Unspecified
mmu-mir-1192	MIMAT0005850	Ino80d	227195	HITS-CLIP	25083871	Unspecified
mmu-mir-29b-3p	MIMAT0000127	Insig1	231070	Reporter assay	17652184	Unspecified
mmu-mir-568	MIMAT0004892	Slc12a2	20496	HITS-CLIP	25083871	Unspecified
mmu-mir-664-3p	MIMAT0012774	Slc12a2	20496	HITS-CLIP	25083871	Unspecified
mmu-mir-297a-5p	MIMAT0000375	Insr	16337	Sequencing	19536157	Unspecified
mmu-mir-29b-3p	MIMAT0000127	Dusp2	13537	Luciferase assay//Microarray//Northern blot//qRT-PCR//Western blot	19342382	Unspecified
mmu-mir-297a-5p	MIMAT0000375	Dusp22	105352	Sequencing	19536157	Unspecified
mmu-let-7b-5p	MIMAT0000522	Dusp6	67603	Sequencing	19536157	Unspecified
mmu-mir-103-3p	MIMAT0000546	Irgq	210146	HITS-CLIP	23597149	Unspecified
mmu-let-7b-5p	MIMAT0000522	Dync1i2	13427	Sequencing	19536157	Unspecified
mmu-let-7b-5p	MIMAT0000522	Slc22a23	73102	Sequencing	19536157	Unspecified
mmu-mir-1192	MIMAT0005850	P2ry1	18441	HITS-CLIP	25083871	Unspecified
mmu-mir-297a-5p	MIMAT0000375	Lyrm9	66274	Sequencing	19536157	Unspecified
mmu-mir-297a-5p	MIMAT0000375	Itfg1	71927	Sequencing	19536157	Unspecified
mmu-mir-297a-5p	MIMAT0000375	Fermt2	218952	Sequencing	19536157	Unspecified
mmu-let-7b-5p	MIMAT0000522	Slc23a2	54338	Sequencing	19536157	Unspecified
mmu-let-7b-5p	MIMAT0000522	E2f3	13557	Sequencing	19536157	Unspecified
mmu-mir-297a-5p	MIMAT0000375	Pak2	224105	Sequencing	19536157	Unspecified
mmu-mir-181b-5p	MIMAT0000673	Ebf3	13593	HITS-CLIP	23142080	Unspecified
mmu-let-7b-5p	MIMAT0000522	Itsn2	20403	Sequencing	19536157	Unspecified
mmu-let-7b-5p	MIMAT0000522	Eea1	216238	Sequencing	19536157	Unspecified
mmu-mir-297a-5p	MIMAT0000375	Eea1	216238	Sequencing	19536157	Unspecified
mmu-let-7b-5p	MIMAT0000522	Wnk1	232341	Sequencing	19536157	Unspecified
mmu-mir-5113	MIMAT0020621	Slc30a7	66500	HITS-CLIP	25083871	Unspecified
mmu-let-7b-5p	MIMAT0000522	Jph4	319984	Sequencing	19536157	Unspecified
mmu-let-7b-5p	MIMAT0000522	Egln2	112406	Sequencing	19536157	Unspecified
mmu-let-7b-5p	MIMAT0000522	Kcna1	16485	Sequencing	19536157	Unspecified
mmu-mir-297a-5p	MIMAT0000375	Kcna1	16485	Sequencing	19536157	Unspecified
mmu-mir-297a-5p	MIMAT0000375	Kcnab1	16497	Sequencing	19536157	Unspecified
mmu-mir-297a-5p	MIMAT0000375	Pbx3	18516	Sequencing	19536157	Unspecified
mmu-let-7b-5p	MIMAT0000522	Kcnc1	16502	Sequencing	19536157	Unspecified
mmu-let-7b-5p	MIMAT0000522	Eif2ak3	13666	Sequencing	19536157	Unspecified
mmu-let-7b-5p	MIMAT0000522	Kcnc2	268345	Sequencing	19536157	Unspecified
mmu-mir-297a-5p	MIMAT0000375	Pcdh17	219228	HITS-CLIP	23597149	Unspecified
mmu-mir-297a-5p	MIMAT0000375	Pcdh17	219228	Sequencing//HITS-CLIP	19536157	Unspecified
mmu-mir-297a-5p	MIMAT0000375	Kcnh1	16510	Sequencing	19536157	Unspecified
mmu-let-7b-5p	MIMAT0000522	Eif4ebp2	13688	Sequencing	19536157	Unspecified
mmu-let-7b-5p	MIMAT0000522	Eif4g2	13690	Sequencing	19536157	Unspecified
mmu-mir-1192	MIMAT0005850	Elavl1	15568	HITS-CLIP	25083871	Unspecified
mmu-mir-692	MIMAT0003471	Elavl3	15571	HITS-CLIP	21258322	Unspecified
mmu-mir-692	MIMAT0003471	Elavl3	15571	HITS-CLIP	23597149	Unspecified
mmu-mir-297a-5p	MIMAT0000375	Foxo3	56484	Sequencing	19536157	Unspecified
mmu-mir-297a-5p	MIMAT0000375	Elk3	13713	Sequencing	19536157	Unspecified
mmu-mir-297a-5p	MIMAT0000375	Kcnk1	16525	Sequencing	19536157	Unspecified
mmu-mir-297a-5p	MIMAT0000375	Kcnk10	72258	Sequencing	19536157	Unspecified
mmu-mir-29b-3p	MIMAT0000127	Eln	13717	Luciferase assay//Microarray//Northern blot//qRT-PCR	18723672	Unspecified
mmu-mir-297a-5p	MIMAT0000375	Elovl4	83603	Sequencing	19536157	Unspecified
mmu-let-7b-5p	MIMAT0000522	Elp2	58523	Sequencing	19536157	Unspecified
mmu-let-7b-5p	MIMAT0000522	Kctd12b	207474	Sequencing	19536157	Unspecified
mmu-let-7b-5p	MIMAT0000522	Kctd21	622320	Sequencing	19536157	Unspecified
mmu-mir-297a-5p	MIMAT0000375	Kctd21	622320	Sequencing	19536157	Unspecified
mmu-let-7b-5p	MIMAT0000522	Kctd7	212919	Sequencing	19536157	Unspecified
mmu-mir-1192	MIMAT0005850	Eno2	13807	HITS-CLIP	25083871	Unspecified
mmu-mir-297a-5p	MIMAT0000375	Eno2	13807	HITS-CLIP	25083871	Unspecified
mmu-let-7b-5p	MIMAT0000522	Khsrp	16549	Sequencing	19536157	Unspecified
mmu-mir-297a-5p	MIMAT0000375	Kif1b	16561	Sequencing	19536157	Unspecified
mmu-mir-297a-5p	MIMAT0000375	Tbc1d24	18209	HITS-CLIP	25083871	Unspecified
mmu-mir-297a-5p	MIMAT0000375	Tbc1d24	224617	HITS-CLIP	25083871	Unspecified
mmu-let-7b-5p	MIMAT0000522	Slc9a2	226999	Sequencing	19536157	Unspecified
mmu-mir-1192	MIMAT0005850	Ephb2	13844	HITS-CLIP	25083871	Unspecified
mmu-let-7b-5p	MIMAT0000522	Ephb3	13845	Sequencing	19536157	Unspecified
mmu-mir-297a-5p	MIMAT0000375	Klhl24	75785	Sequencing	19536157	Unspecified
mmu-mir-568	MIMAT0004892	Klhl24	75785	HITS-CLIP	25083871	Unspecified
mmu-mir-297a-5p	MIMAT0000375	Erc2	238988	Sequencing	19536157	Unspecified
mmu-let-7b-5p	MIMAT0000522	Mex3a	72640	Sequencing	19536157	Unspecified
mmu-mir-1192	MIMAT0005850	Kras	16653	HITS-CLIP	25083871	Unspecified
mmu-let-7b-5p	MIMAT0000522	Smg1	233789	Sequencing	19536157	Unspecified
mmu-let-7b-5p	MIMAT0000522	Pigs	276846	Sequencing	19536157	Unspecified
mmu-mir-297a-5p	MIMAT0000375	Fam73b	108958	Sequencing	19536157	Unspecified
mmu-let-7b-5p	MIMAT0000522	Pik3ip1	216505	Sequencing	19536157	Unspecified
mmu-mir-103-3p	MIMAT0000546	Pik3r1	18708	qRT-PCR	25100599	Unspecified
mmu-mir-297a-5p	MIMAT0000375	Larp4b	217980	Sequencing	19536157	Unspecified
mmu-let-7b-5p	MIMAT0000522	Lcor	212391	Sequencing	19536157	Unspecified
mmu-mir-181b-5p	MIMAT0000673	Pitpnc1	71795	Microarray	18762567	Unspecified
mmu-mir-297a-5p	MIMAT0000375	Lcorl	209707	HITS-CLIP	25083871	Unspecified
mmu-mir-1192	MIMAT0005850	Faf1	14084	HITS-CLIP	25083871	Unspecified
mmu-mir-1192	MIMAT0005850	Faf1	14084	HITS-CLIP	21258322	Unspecified
mmu-mir-297a-5p	MIMAT0000375	Fam101b	76566	Sequencing	19536157	Unspecified
mmu-mir-297a-5p	MIMAT0000375	Leprotl1	68192	Sequencing	19536157	Unspecified
mmu-let-7b-5p	MIMAT0000522	Lfng	16848	Sequencing	19536157	Unspecified
mmu-mir-297a-5p	MIMAT0000375	Fam110b	242297	Sequencing	19536157	Unspecified
mmu-mir-297a-5p	MIMAT0000375	Sos1	20662	Sequencing	19536157	Unspecified
mmu-let-7b-5p	MIMAT0000522	Sowaha	237761	Sequencing	19536157	Unspecified
mmu-let-7b-5p	MIMAT0000522	Fam118a	73225	Sequencing	19536157	Unspecified
mmu-mir-692	MIMAT0003471	Lhx5	16873	HITS-CLIP	26203562	Unspecified
mmu-mir-692	MIMAT0003471	Lhx5	16873	HITS-CLIP	21258322	Unspecified
mmu-let-7b-5p	MIMAT0000522	Fam135a	68187	Sequencing	19536157	Unspecified
mmu-let-7b-5p	MIMAT0000522	Limd1	29806	Sequencing	19536157	Unspecified
mmu-mir-297a-5p	MIMAT0000375	Lims1	110829	Sequencing	19536157	Unspecified
mmu-let-7c-5p	MIMAT0000523	Lin28a	83557	Microarray//qRT-PCR//Western blot	20054295	Unspecified
mmu-let-7b-5p	MIMAT0000522	Fam171a1	269233	Sequencing	19536157	Unspecified
mmu-mir-692	MIMAT0003471	Ntm	235106	HITS-CLIP	23597149	Unspecified
mmu-let-7b-5p	MIMAT0000522	Fam175b	109359	Sequencing	19536157	Unspecified
mmu-mir-674-5p	MIMAT0003740	Fam177a	73385	HITS-CLIP	21258322	Unspecified
mmu-mir-29c-3p	MIMAT0000536	Spry1	24063	Immunofluorescence//Luciferase assay//Northern blot//qRT-PCR	21310958	Unspecified
mmu-mir-674-5p	MIMAT0003740	Zfp605	675812	HITS-CLIP	21258322	Unspecified
mmu-mir-1192	MIMAT0005850	Lnp	69605	HITS-CLIP	21258322	Unspecified
mmu-mir-5113	MIMAT0020621	Fam198b	68659	HITS-CLIP	21258322	Unspecified
mmu-let-7b-5p	MIMAT0000522	Rdh10	98711	Sequencing	19536157	Unspecified
mmu-let-7b-5p	MIMAT0000522	Zfp664	269704	Sequencing	19536157	Unspecified
mmu-mir-133a-3p	MIMAT0000145	Srf	20807	Microarray//Northern blot	16380711	Unspecified
mmu-mir-133a-3p	MIMAT0000145	Srf	20807	Luciferase assay//Western blot	20056941	Unspecified
mmu-let-7b-5p	MIMAT0000522	Reep4	72549	Sequencing	19536157	Unspecified
mmu-mir-297a-5p	MIMAT0000375	Fam49a	76820	HITS-CLIP	23142080	Unspecified
mmu-mir-692	MIMAT0003471	Fam49a	76820	HITS-CLIP	21258322	Unspecified
mmu-mir-181b-5p	MIMAT0000673	Fam69c	240479	HITS-CLIP	25083871	Unspecified
mmu-mir-23b-3p	MIMAT0000125	Lrch1	380916	HITS-CLIP	25083871	Unspecified
mmu-mir-664-3p	MIMAT0012774	Fam78b	226610	HITS-CLIP	25083871	Unspecified
mmu-let-7b-5p	MIMAT0000522	Farp1	223254	Sequencing	19536157	Unspecified
mmu-mir-23b-3p	MIMAT0000125	Fas	14102	FACS//Luciferase assay//qRT-PCR	24356489	Unspecified
mmu-let-7b-5p	MIMAT0000522	Fbxl14	101358	HITS-CLIP	25083871	Unspecified
mmu-let-7c-5p	MIMAT0000523	Fbxl14	101358	HITS-CLIP	25083871	Unspecified
mmu-let-7b-5p	MIMAT0000522	Stat3	20848	Sequencing	19536157	Unspecified
mmu-let-7b-5p	MIMAT0000522	Lsamp	268890	Sequencing	19536157	Unspecified
mmu-let-7c-5p	MIMAT0000523	Myc	17869	Luciferase assay//Microarray//qRT-PCR//Other	17438130	Unspecified
mmu-mir-297a-5p	MIMAT0000375	Stk3	56274	Sequencing	19536157	Unspecified
mmu-mir-297a-5p	MIMAT0000375	Prex2	109294	Sequencing	19536157	Unspecified
mmu-let-7b-5p	MIMAT0000522	Prickle1	106042	Sequencing	19536157	Unspecified
mmu-mir-297a-5p	MIMAT0000375	Gpr158	241263	Sequencing	19536157	Unspecified
mmu-mir-1192	MIMAT0005850	Prkag2	108099	HITS-CLIP	21258322	Unspecified
mmu-mir-103-3p	MIMAT0000546	Lyrm9	66274	HITS-CLIP	21258322	Unspecified
mmu-let-7b-5p	MIMAT0000522	Gpr63	81006	Sequencing	19536157	Unspecified
mmu-mir-692	MIMAT0003471	Lzts3	241638	HITS-CLIP	23597149	Unspecified
mmu-let-7b-5p	MIMAT0000522	Fgd4	224014	Sequencing	19536157	Unspecified
mmu-mir-297a-5p	MIMAT0000375	Macf1	11426	Sequencing	19536157	Unspecified
mmu-mir-297a-5p	MIMAT0000375	Zmat3	22401	Sequencing	19536157	Unspecified
mmu-let-7b-5p	MIMAT0000522	Flna	192176	Sequencing	19536157	Unspecified
mmu-mir-200b-3p	MIMAT0000233	Flt1	14254	Luciferase assay	21115742	Unspecified
mmu-let-7b-5p	MIMAT0000522	Flywch1	224613	Sequencing	19536157	Unspecified
mmu-mir-674-5p	MIMAT0003740	Zyg11b	414872	HITS-CLIP	21258322	Unspecified
mmu-mir-692	MIMAT0003471	Fmnl2	71409	HITS-CLIP	23142080	Unspecified
mmu-mir-1192	MIMAT0005850	Map4	17758	HITS-CLIP	25083871	Unspecified
mmu-mir-297a-5p	MIMAT0000375	Map4k3	225028	Sequencing	19536157	Unspecified
mmu-mir-23b-3p	MIMAT0000125	Map7d1	245877	HITS-CLIP	26203562	Unspecified
mmu-mir-200b-3p	MIMAT0000233	Mapk14	26416	Microarray//qRT-PCR	22101765	Unspecified
mmu-mir-3076-5p	MIMAT0014860	Foxk1	17425	HITS-CLIP	23142080	Unspecified
mmu-let-7b-5p	MIMAT0000522	Syt5	53420	Sequencing	19536157	Unspecified
mmu-mir-692	MIMAT0003471	Foxp1	108655	HITS-CLIP	23142080	Unspecified
mmu-mir-1192	MIMAT0005850	Foxp2	114142	HITS-CLIP	25083871	Unspecified
mmu-let-7b-5p	MIMAT0000522	Ptgds	19215	Sequencing	19536157	Unspecified
mmu-let-7b-5p	MIMAT0000522	Slc4a8	59033	Sequencing	19536157	Unspecified
mmu-mir-297a-5p	MIMAT0000375	Tardbp	230908	Sequencing	19536157	Unspecified
mmu-let-7b-5p	MIMAT0000522	Pdgfrb	18596	Sequencing	19536157	Unspecified
mmu-let-7b-5p	MIMAT0000522	Tbc1d14	102641289	Sequencing	19536157	Unspecified
mmu-let-7b-5p	MIMAT0000522	Tbc1d24	224617	Sequencing	19536157	Unspecified
mmu-let-7b-5p	MIMAT0000522	Fut9	14348	Sequencing	19536157	Unspecified
mmu-mir-29b-3p	MIMAT0000127	Mcl1	17210	HITS-CLIP	23597149	Unspecified
mmu-mir-29c-3p	MIMAT0000536	Mcl1	17210	HITS-CLIP	23597149	Unspecified
mmu-mir-1192	MIMAT0005850	Fzd6	14368	HITS-CLIP	25083871	Unspecified
mmu-mir-297a-5p	MIMAT0000375	Gabpb2	213054	HITS-CLIP	25083871	Unspecified
mmu-let-7b-5p	MIMAT0000522	Pxdn	69675	Sequencing	19536157	Unspecified
mmu-let-7b-5p	MIMAT0000522	Gabra6	14399	Sequencing	19536157	Unspecified
mmu-let-7b-5p	MIMAT0000522	Gabrb2	14401	Sequencing	19536157	Unspecified
mmu-mir-297a-5p	MIMAT0000375	Gabrb2	14401	HITS-CLIP	25083871	Unspecified
mmu-let-7b-5p	MIMAT0000522	Gad1	14415	Sequencing	19536157	Unspecified
mmu-mir-1192	MIMAT0005850	Med28	66999	HITS-CLIP	25083871	Unspecified
mmu-mir-1192	MIMAT0005850	Megf10	70417	HITS-CLIP	25083871	Unspecified
mmu-let-7b-5p	MIMAT0000522	Rab11fip4	268451	Sequencing	19536157	Unspecified
mmu-mir-297a-5p	MIMAT0000375	Rab3c	67295	HITS-CLIP	21258322	Unspecified
mmu-let-7b-5p	MIMAT0000522	Knop1	66356	Sequencing	19536157	Unspecified
mmu-let-7b-5p	MIMAT0000522	Sec14l1	74136	Sequencing	19536157	Unspecified
mmu-mir-297a-5p	MIMAT0000375	Mfap3l	71306	HITS-CLIP	25083871	Unspecified
mmu-let-7b-5p	MIMAT0000522	Gba2	230101	Sequencing	19536157	Unspecified
mmu-mir-674-5p	MIMAT0003740	Srp72	66661	HITS-CLIP	25083871	Unspecified
mmu-mir-181b-5p	MIMAT0000673	Gch1	14528	Microarray	18762567	Unspecified
mmu-mir-297a-5p	MIMAT0000375	Rabep1	54189	Sequencing	19536157	Unspecified
mmu-mir-297a-5p	MIMAT0000375	Mfsd4	213006	Sequencing	19536157	Unspecified
mmu-mir-297a-5p	MIMAT0000375	Gnaq	14682	HITS-CLIP	25083871	Unspecified
mmu-mir-200b-3p	MIMAT0000233	Mgat3	17309	HITS-CLIP	25083871	Unspecified
mmu-mir-297a-5p	MIMAT0000375	Gfod1	328232	HITS-CLIP	25083871	Unspecified
mmu-let-7b-5p	MIMAT0000522	Tgfbr3	21814	Sequencing	19536157	Unspecified
mmu-mir-1192	MIMAT0005850	Mllt3	70122	HITS-CLIP	25083871	Unspecified
mmu-mir-3076-5p	MIMAT0014860	Gjc3	118446	HITS-CLIP	25083871	Unspecified
mmu-mir-3076-5p	MIMAT0014860	Gjc3	118446	HITS-CLIP	21258322	Unspecified
mmu-mir-297a-5p	MIMAT0000375	Idnk	75731	Sequencing	19536157	Unspecified
mmu-mir-297a-5p	MIMAT0000375	Glce	93683	Sequencing	19536157	Unspecified
mmu-mir-297a-5p	MIMAT0000375	Rasgrp1	19419	Sequencing	19536157	Unspecified
mmu-let-7b-5p	MIMAT0000522	Mnt	17428	Sequencing	19536157	Unspecified
mmu-mir-297a-5p	MIMAT0000375	Mnt	17428	Sequencing	19536157	Unspecified
mmu-mir-103-3p	MIMAT0000546	Tln2	70549	HITS-CLIP	25083871	Unspecified
mmu-mir-29b-3p	MIMAT0000127	Igf1	16000	ELISA//Luciferase assay//qRT-PCR	23880139	Unspecified
mmu-let-7b-5p	MIMAT0000522	Nrp2	18187	Sequencing	19536157	Unspecified
mmu-mir-297a-5p	MIMAT0000375	Tmcc1	330401	Sequencing	19536157	Unspecified
mmu-mir-1192	MIMAT0005850	Nrxn3	18191	HITS-CLIP	25083871	Unspecified
mmu-mir-23b-3p	MIMAT0000125	Zfp488	382867	HITS-CLIP	25083871	Unspecified
mmu-mir-674-5p	MIMAT0003740	Mpv17l	93734	HITS-CLIP	21258322	Unspecified
mmu-mir-181b-5p	MIMAT0000673	Tmem14a	75712	Microarray	18762567	Unspecified
mmu-mir-1192	MIMAT0005850	Rc3h2	319817	HITS-CLIP	25083871	Unspecified
mmu-mir-297a-5p	MIMAT0000375	Nudt19	110959	Sequencing	19536157	Unspecified
mmu-mir-200b-3p	MIMAT0000233	Ikzf5	67143	HITS-CLIP	25083871	Unspecified
mmu-mir-29b-3p	MIMAT0000127	Mrpl35	66223	HITS-CLIP	21258322	Unspecified
mmu-mir-29c-3p	MIMAT0000536	Mrpl35	66223	HITS-CLIP	21258322	Unspecified
mmu-mir-692	MIMAT0003471	Usp22	216825	HITS-CLIP	21258322	Unspecified
mmu-mir-200b-3p	MIMAT0000233	Rdh10	98711	HITS-CLIP	25083871	Unspecified
mmu-mir-1192	MIMAT0005850	Gmeb1	56809	HITS-CLIP	25083871	Unspecified
mmu-mir-1192	MIMAT0005850	Gmeb1	56809	HITS-CLIP	21258322	Unspecified
mmu-mir-297a-5p	MIMAT0000375	Gmeb1	56809	Sequencing	19536157	Unspecified
mmu-let-7b-5p	MIMAT0000522	Gnal	14680	Sequencing	19536157	Unspecified
mmu-mir-297a-5p	MIMAT0000375	Gnb4	14696	HITS-CLIP	25083871	Unspecified
mmu-mir-297a-5p	MIMAT0000375	Gnb4	14696	HITS-CLIP	23142080	Unspecified
mmu-let-7b-5p	MIMAT0000522	Mtf2	17765	Sequencing	19536157	Unspecified
mmu-mir-200b-3p	MIMAT0000233	Mtf2	17765	HITS-CLIP	23142080	Unspecified
mmu-mir-297a-5p	MIMAT0000375	Rgs8	67792	HITS-CLIP	21258322	Unspecified
mmu-let-7b-5p	MIMAT0000522	Gnl3l	237107	HITS-CLIP	25083871	Unspecified
mmu-let-7b-5p	MIMAT0000522	Gnl3l	237107	HITS-CLIP	21258322	Unspecified
mmu-let-7c-5p	MIMAT0000523	Gnl3l	237107	HITS-CLIP	25083871	Unspecified
mmu-let-7c-5p	MIMAT0000523	Gnl3l	237107	HITS-CLIP	21258322	Unspecified
mmu-mir-1192	MIMAT0005850	Slc10a4	231290	HITS-CLIP	25083871	Unspecified
mmu-let-7b-5p	MIMAT0000522	Gns	75612	Sequencing	19536157	Unspecified
mmu-mir-3076-3p	MIMAT0014861	Golga2	99412	HITS-CLIP	21258322	Unspecified
mmu-mir-297a-5p	MIMAT0000375	Gorasp1	74498	Sequencing	19536157	Unspecified
mmu-mir-1192	MIMAT0005850	Riok3	66878	HITS-CLIP	25083871	Unspecified
mmu-mir-674-5p	MIMAT0003740	Irak1	16179	HITS-CLIP	21258322	Unspecified
mmu-mir-133a-3p	MIMAT0000145	Nelfa	24116	Luciferase assay//Microarray//Northern blot//Western blot	17468766	Unspecified
mmu-let-7c-5p	MIMAT0000523	Myc	17869	Microarray//qRT-PCR//Western blot	20054295	Unspecified
mmu-mir-103-3p	MIMAT0000546	Irgq	210146	HITS-CLIP	25083871	Unspecified
mmu-let-7b-5p	MIMAT0000522	Gpr137	107173	Sequencing	19536157	Unspecified
mmu-mir-674-5p	MIMAT0003740	Myh10	77579	HITS-CLIP	23142080	Unspecified
mmu-mir-297a-5p	MIMAT0000375	Wdr13	73447	Sequencing	19536157	Unspecified
mmu-mir-200b-3p	MIMAT0000233	Pafah1b1	18472	Western blot	23776576	Unspecified
mmu-mir-133a-3p	MIMAT0000145	Tnrc6b	213988	HITS-CLIP	21258322	Unspecified
mmu-let-7b-5p	MIMAT0000522	Rnf213	672511	Sequencing	19536157	Unspecified
mmu-let-7b-5p	MIMAT0000522	Rnf5	54197	Sequencing	19536157	Unspecified
mmu-mir-297a-5p	MIMAT0000375	Robo1	19876	Sequencing	19536157	Unspecified
mmu-let-7b-5p	MIMAT0000522	Naa40	70999	Sequencing	19536157	Unspecified
mmu-let-7b-5p	MIMAT0000522	Gria2	14800	Sequencing	19536157	Unspecified
mmu-mir-297a-5p	MIMAT0000375	Rorb	225998	HITS-CLIP	23597149	Unspecified
mmu-mir-297a-5p	MIMAT0000375	Rorb	225998	HITS-CLIP	19536157	Unspecified
mmu-let-7b-5p	MIMAT0000522	Grik2	14806	Sequencing	19536157	Unspecified
mmu-mir-1192	MIMAT0005850	Nacc2	67991	HITS-CLIP	25083871	Unspecified
mmu-let-7b-5p	MIMAT0000522	Rpia	19895	Reporter assay	15131085	Unspecified
mmu-mir-297a-5p	MIMAT0000375	Xiap	11798	HITS-CLIP	25083871	Unspecified
mmu-mir-297a-5p	MIMAT0000375	Pbrm1	66923	Sequencing	19536157	Unspecified
mmu-mir-1192	MIMAT0005850	Vamp4	53330	HITS-CLIP	25083871	Unspecified
mmu-let-7b-5p	MIMAT0000522	Gtf3c2	71752	Sequencing	19536157	Unspecified
mmu-mir-297a-5p	MIMAT0000375	Nbeal1	269198	HITS-CLIP	25083871	Unspecified
mmu-mir-297a-5p	MIMAT0000375	Nbeal1	269198	HITS-CLIP	21258322	Unspecified
mmu-mir-1192	MIMAT0005850	Ncam1	17967	HITS-CLIP	25083871	Unspecified
mmu-mir-1192	MIMAT0005850	Ncam1	17967	HITS-CLIP	21258322	Unspecified
mmu-mir-297a-5p	MIMAT0000375	Ncam1	17967	HITS-CLIP	19536157	Unspecified
mmu-mir-297a-5p	MIMAT0000375	Rsf1	233532	Sequencing	19536157	Unspecified
mmu-mir-297a-5p	MIMAT0000375	Slc39a10	227059	Sequencing	19536157	Unspecified
mmu-let-7b-5p	MIMAT0000522	Sned1	208777	Sequencing	19536157	Unspecified
mmu-mir-181b-5p	MIMAT0000673	Trim2	80890	HITS-CLIP	25083871	Unspecified
mmu-mir-568	MIMAT0004892	Trim2	80890	HITS-CLIP	25083871	Unspecified
mmu-mir-297a-5p	MIMAT0000375	Kcnj3	16519	Sequencing	19536157	Unspecified
mmu-let-7b-5p	MIMAT0000522	Ncor1	20185	Sequencing	19536157	Unspecified
mmu-let-7b-5p	MIMAT0000522	Slc4a7	218756	Sequencing	19536157	Unspecified
mmu-mir-297a-5p	MIMAT0000375	Pde6d	18582	Sequencing	19536157	Unspecified
mmu-let-7c-5p	MIMAT0000523	Sall4	99377	Luciferase assay//Microarray//qRT-PCR//Western blot//Immunohistochemistry	20054295	Unspecified
mmu-mir-297a-5p	MIMAT0000375	Neto2	74513	Sequencing	19536157	Unspecified
mmu-mir-297a-5p	MIMAT0000375	Neu1	18010	HITS-CLIP	25083871	Unspecified
mmu-mir-297a-5p	MIMAT0000375	P2ry12	70839	Sequencing	19536157	Unspecified
mmu-mir-1192	MIMAT0005850	Scamp1	107767	HITS-CLIP	23597149	Unspecified
mmu-mir-1192	MIMAT0005850	Scamp1	107767	HITS-CLIP	25083871	Unspecified
mmu-mir-103-3p	MIMAT0000546	Spen	56381	HITS-CLIP	23142080	Unspecified
mmu-let-7b-5p	MIMAT0000522	Scara3	219151	Sequencing	19536157	Unspecified
mmu-mir-297a-5p	MIMAT0000375	Scd1	20249	Sequencing	19536157	Unspecified
mmu-mir-1192	MIMAT0005850	Scmh1	29871	HITS-CLIP	25083871	Unspecified
mmu-mir-297a-5p	MIMAT0000375	Scn2a1	110876	Sequencing	19536157	Unspecified
mmu-let-7b-5p	MIMAT0000522	Ttc14	67120	Sequencing	19536157	Unspecified
mmu-mir-181b-5p	MIMAT0000673	Hk2	15277	Microarray	18762567	Unspecified
mmu-let-7b-5p	MIMAT0000522	Scn8a	20273	Sequencing	19536157	Unspecified
mmu-mir-297a-5p	MIMAT0000375	Scn8a	20273	Sequencing	19536157	Unspecified
mmu-mir-297a-5p	MIMAT0000375	Scrn1	69938	Sequencing	19536157	Unspecified
mmu-mir-181b-5p	MIMAT0000673	Smarca4	20586	HITS-CLIP	21258322	Unspecified
mmu-mir-181b-5p	MIMAT0000673	Smarca4	20586	HITS-CLIP	26203562	Unspecified
mmu-mir-297a-5p	MIMAT0000375	Mettl5	75422	Sequencing	19536157	Unspecified
mmu-mir-674-5p	MIMAT0003740	Srp72	66661	HITS-CLIP	23142080	Unspecified
mmu-let-7b-5p	MIMAT0000522	Tub	22141	Sequencing	19536157	Unspecified
mmu-mir-297a-5p	MIMAT0000375	Zfp108	54678	Sequencing	19536157	Unspecified
mmu-let-7b-5p	MIMAT0000522	Hoxb4	15412	Sequencing	19536157	Unspecified
mmu-mir-181b-5p	MIMAT0000673	Tulp3	22158	HITS-CLIP	25083871	Unspecified
mmu-mir-297a-5p	MIMAT0000375	Vamp4	53330	Sequencing	19536157	Unspecified
mmu-let-7b-5p	MIMAT0000522	Sema4g	26456	Sequencing	19536157	Unspecified
mmu-let-7b-5p	MIMAT0000522	Hr	15460	Sequencing	19536157	Unspecified
mmu-mir-29b-3p	MIMAT0000127	Hrk	12123	Luciferase assay//Microarray//qRT-PCR//Western blot	21245165	Unspecified
mmu-let-7b-5p	MIMAT0000522	Nol8	70930	Sequencing	19536157	Unspecified
mmu-mir-1192	MIMAT0005850	Senp5	320213	HITS-CLIP	21258322	Unspecified
mmu-mir-200b-3p	MIMAT0000233	Senp5	320213	HITS-CLIP	25083871	Unspecified
mmu-mir-200b-3p	MIMAT0000233	Senp5	320213	HITS-CLIP	23142080	Unspecified
mmu-mir-297a-5p	MIMAT0000375	2015-09-01	93684	Sequencing	19536157	Unspecified
mmu-mir-297a-5p	MIMAT0000375	Zfp260	26466	Sequencing	19536157	Unspecified
mmu-mir-568	MIMAT0004892	2008-09-01	20362	HITS-CLIP	25083871	Unspecified
mmu-mir-297a-5p	MIMAT0000375	Iars	105148	Sequencing	19536157	Unspecified
mmu-let-7b-5p	MIMAT0000522	Nr2e1	21907	Reporter assay//Western blot//qRT-PCR	20133835	Unspecified
mmu-mir-297a-5p	MIMAT0000375	Nr2f2	11819	Sequencing	19536157	Unspecified
mmu-let-7b-5p	MIMAT0000522	Vsnl1	26950	Sequencing	19536157	Unspecified
mmu-mir-297a-5p	MIMAT0000375	Lgr4	107515	Sequencing	19536157	Unspecified
mmu-let-7b-5p	MIMAT0000522	Nras	18176	Sequencing	19536157	Unspecified
mmu-let-7b-5p	MIMAT0000522	Sfmbt1	54650	Sequencing	19536157	Unspecified
mmu-mir-29b-3p	MIMAT0000127	Sox2	20674	Luciferase assay	23266889	Unspecified
mmu-mir-3076-5p	MIMAT0014860	Sfrp1	20377	HITS-CLIP	23142080	Unspecified
mmu-mir-297a-5p	MIMAT0000375	Tm6sf1	107769	Sequencing	19536157	Unspecified
mmu-mir-297a-5p	MIMAT0000375	Uck2	80914	Sequencing	19536157	Unspecified
mmu-let-7b-5p	MIMAT0000522	Igf1r	16001	Sequencing	19536157	Unspecified
mmu-mir-133a-3p	MIMAT0000145	Igf1r	16001	Luciferase assay	22195016	Unspecified
mmu-mir-3076-5p	MIMAT0014860	Zfp488	382867	HITS-CLIP	21258322	Unspecified
mmu-mir-692	MIMAT0003471	Myrip	245049	HITS-CLIP	23142080	Unspecified
mmu-mir-297a-5p	MIMAT0000375	Iglon5	210094	HITS-CLIP	23597149	Unspecified
mmu-mir-297a-5p	MIMAT0000375	Zfp521	225207	Sequencing	19536157	Unspecified
mmu-mir-1192	MIMAT0005850	Sh3bgrl	56726	HITS-CLIP	25083871	Unspecified
mmu-mir-23b-3p	MIMAT0000125	Lmnb1	16906	Luciferase assay//Western blot	19259393	Unspecified
mmu-mir-297a-5p	MIMAT0000375	Lmnb1	16906	Sequencing	19536157	Unspecified
mmu-mir-674-5p	MIMAT0003740	Sh3rf3	237353	HITS-CLIP	23142080	Unspecified
mmu-mir-297a-5p	MIMAT0000375	Shank2	210274	Sequencing	19536157	Unspecified
mmu-mir-181b-5p	MIMAT0000673	Lnp	69605	HITS-CLIP	23142080	Unspecified
mmu-mir-181b-5p	MIMAT0000673	Lnp	69605	HITS-CLIP	25083871	Unspecified
mmu-mir-1192	MIMAT0005850	Uri1	19777	HITS-CLIP	25083871	Unspecified
mmu-mir-1192	MIMAT0005850	Zfp619	70227	HITS-CLIP	25083871	Unspecified
mmu-let-7b-5p	MIMAT0000522	Sptbn2	20743	Sequencing	19536157	Unspecified
mmu-let-7b-5p	MIMAT0000522	Usp32	237898	Sequencing	19536157	Unspecified
mmu-let-7b-5p	MIMAT0000522	Nup35	69482	Sequencing	19536157	Unspecified
mmu-mir-297a-5p	MIMAT0000375	Nup35	69482	Sequencing	19536157	Unspecified
mmu-mir-297a-5p	MIMAT0000375	Rdx	19684	Sequencing	19536157	Unspecified
mmu-mir-692	MIMAT0003471	Sik3	70661	HITS-CLIP	25083871	Unspecified
mmu-let-7b-5p	MIMAT0000522	Srgap3	259302	Sequencing	19536157	Unspecified
mmu-mir-297a-5p	MIMAT0000375	Srgap3	259302	Sequencing	19536157	Unspecified
mmu-let-7b-5p	MIMAT0000522	Piga	18700	Sequencing	19536157	Unspecified
mmu-let-7b-5p	MIMAT0000522	Zfp740	68744	Sequencing	19536157	Unspecified
mmu-mir-297a-5p	MIMAT0000375	Ppap2b	67916	Sequencing	19536157	Unspecified
mmu-let-7b-5p	MIMAT0000522	Ppargc1b	170826	Sequencing	19536157	Unspecified
mmu-let-7b-5p	MIMAT0000522	Msra	110265	Sequencing	19536157	Unspecified
mmu-mir-297a-5p	MIMAT0000375	Pcdh17	219228	HITS-CLIP	25083871	Unspecified
mmu-let-7b-5p	MIMAT0000522	Skil	20482	Sequencing	19536157	Unspecified
mmu-mir-200b-3p	MIMAT0000233	Ogfod1	270086	HITS-CLIP	25083871	Unspecified
mmu-mir-200b-3p	MIMAT0000233	Ogfod1	270086	HITS-CLIP	23597149	Unspecified
mmu-mir-297a-5p	MIMAT0000375	Ssr3	67437	Sequencing	19536157	Unspecified
mmu-mir-297a-5p	MIMAT0000375	Slc12a2	20496	HITS-CLIP	25083871	Unspecified
mmu-let-7b-5p	MIMAT0000522	Slc15a2	57738	Sequencing	19536157	Unspecified
mmu-mir-23b-3p	MIMAT0000125	Pde10a	23984	HITS-CLIP	25083871	Unspecified
mmu-mir-23b-3p	MIMAT0000125	Pde10a	23984	HITS-CLIP	23142080	Unspecified
mmu-mir-297a-5p	MIMAT0000375	Son	20658	Sequencing	19536157	Unspecified
mmu-let-7b-5p	MIMAT0000522	Pqlc2	212555	Sequencing	19536157	Unspecified
mmu-mir-1192	MIMAT0005850	Lsm6	78651	HITS-CLIP	21258322	Unspecified
mmu-mir-297a-5p	MIMAT0000375	Otud4	73945	Sequencing	19536157	Unspecified
mmu-let-7b-5p	MIMAT0000522	Otud5	54644	Sequencing	19536157	Unspecified
mmu-mir-103-3p	MIMAT0000546	Irgq	210146	HITS-CLIP	19536157	Unspecified
mmu-mir-103-3p	MIMAT0000546	Irgq	210146	HITS-CLIP	23142080	Unspecified
mmu-mir-297a-5p	MIMAT0000375	Slc1a4	55963	Sequencing	19536157	Unspecified
mmu-mir-200b-3p	MIMAT0000233	Zfpm2	22762	Immunohistochemistry//qRT-PCR//Western blot	23788640	Unspecified
mmu-let-7b-5p	MIMAT0000522	Slc22a6	18399	Sequencing	19536157	Unspecified
mmu-mir-297a-5p	MIMAT0000375	Prkcb	18751	Sequencing	19536157	Unspecified
mmu-mir-692	MIMAT0003471	Prkcb	18751	HITS-CLIP	21258322	Unspecified
mmu-mir-692	MIMAT0003471	Prkcb	18751	HITS-CLIP	23597149	Unspecified
mmu-mir-133a-3p	MIMAT0000145	Runx2	12393	Luciferase assay//Western blot	20056941	Unspecified
mmu-mir-297a-5p	MIMAT0000375	Slc24a2	76376	HITS-CLIP	25083871	Unspecified
mmu-mir-297a-5p	MIMAT0000375	Slc24a2	76376	Sequencing	19536157	Unspecified
mmu-let-7b-5p	MIMAT0000522	Slc25a23	66972	Sequencing	19536157	Unspecified
mmu-let-7b-5p	MIMAT0000522	Slc25a4	11739	Sequencing	19536157	Unspecified
mmu-mir-297a-5p	MIMAT0000375	Suco	226551	Sequencing	19536157	Unspecified
mmu-mir-692	MIMAT0003471	Pappa	18491	HITS-CLIP	21258322	Unspecified
mmu-mir-568	MIMAT0004892	Iws1	73473	HITS-CLIP	25083871	Unspecified
mmu-let-7b-5p	MIMAT0000522	Jam2	67374	Sequencing	19536157	Unspecified
mmu-mir-200b-3p	MIMAT0000233	Zeb2	24136	qRT-PCR//Luciferase assay	19787069	Unspecified
mmu-let-7b-5p	MIMAT0000522	Slc29a3	71279	Sequencing	19536157	Unspecified
mmu-let-7b-5p	MIMAT0000522	Prrc2c	226562	Sequencing	19536157	Unspecified
mmu-let-7b-5p	MIMAT0000522	Slc2a6	227659	Sequencing	19536157	Unspecified
mmu-mir-297a-5p	MIMAT0000375	Slc31a1	20529	Sequencing	19536157	Unspecified
mmu-mir-297a-5p	MIMAT0000375	Pja1	18744	Sequencing	19536157	Unspecified
mmu-let-7b-5p	MIMAT0000522	Slc35a4	67843	Sequencing	19536157	Unspecified
mmu-let-7b-5p	MIMAT0000522	Pbrm1	66923	Sequencing	19536157	Unspecified
mmu-mir-297a-5p	MIMAT0000375	Rab9b	319642	Sequencing	19536157	Unspecified
mmu-mir-1192	MIMAT0005850	Slc35e1	270066	HITS-CLIP	21258322	Unspecified
mmu-let-7b-5p	MIMAT0000522	Lrig2	269473	Sequencing	19536157	Unspecified
mmu-mir-1192	MIMAT0005850	Lrig2	269473	HITS-CLIP	21258322	Unspecified
mmu-mir-1192	MIMAT0005850	Slc35f1	215085	HITS-CLIP	25083871	Unspecified
mmu-let-7b-5p	MIMAT0000522	Kcnj10	16513	Sequencing	19536157	Unspecified
mmu-mir-297a-5p	MIMAT0000375	Rsbn1l	242860	Sequencing	19536157	Unspecified
mmu-let-7b-5p	MIMAT0000522	Pcgf3	69587	Sequencing	19536157	Unspecified
mmu-mir-674-5p	MIMAT0003740	Pcsk6	18553	HITS-CLIP	23142080	Unspecified
mmu-mir-297a-5p	MIMAT0000375	Slc4a10	94229	Sequencing	19536157	Unspecified
mmu-mir-297a-5p	MIMAT0000375	Pdcl	67466	Sequencing	19536157	Unspecified
mmu-mir-297a-5p	MIMAT0000375	Pde10a	23984	Sequencing	19536157	Unspecified
mmu-mir-297a-5p	MIMAT0000375	Pde5a	242202	Sequencing	19536157	Unspecified
mmu-mir-297a-5p	MIMAT0000375	S100b	20203	Sequencing	19536157	Unspecified
mmu-mir-29c-3p	MIMAT0000536	Yy1	22632	Luciferase assay//Western blot	18977326	Unspecified
mmu-mir-1192	MIMAT0005850	Kdm5a	214899	HITS-CLIP	21258322	Unspecified
mmu-let-7b-5p	MIMAT0000522	Kif1a	16560	Sequencing	19536157	Unspecified
mmu-let-7b-5p	MIMAT0000522	Pld3	18807	Sequencing	19536157	Unspecified
mmu-mir-692	MIMAT0003471	Lhx5	16873	HITS-CLIP	23597149	Unspecified
mmu-mir-5113	MIMAT0020621	Pdzd8	107368	HITS-CLIP	21258322	Unspecified
mmu-let-7b-5p	MIMAT0000522	Kif21b	16565	Sequencing	19536157	Unspecified
mmu-mir-674-5p	MIMAT0003740	Tbc1d24	224617	HITS-CLIP	21258322	Unspecified
mmu-mir-297a-5p	MIMAT0000375	Ugt8a	22239	Sequencing	19536157	Unspecified
mmu-mir-297a-5p	MIMAT0000375	Nrxn1	18189	HITS-CLIP	23142080	Unspecified
mmu-let-7b-5p	MIMAT0000522	Snx5	69178	Sequencing	19536157	Unspecified
mmu-mir-181b-5p	MIMAT0000673	Pfkfb3	170768	Microarray	18762567	Unspecified
mmu-mir-297a-5p	MIMAT0000375	Tspan2	70747	Sequencing	19536157	Unspecified
mmu-let-7b-5p	MIMAT0000522	Klf8	245671	Sequencing	19536157	Unspecified
mmu-mir-297a-5p	MIMAT0000375	Klhdc10	76788	Sequencing	19536157	Unspecified
mmu-mir-297a-5p	MIMAT0000375	Klhdc8a	213417	Sequencing	19536157	Unspecified
mmu-mir-23b-3p	MIMAT0000125	Smad3	17127	In situ hybridization//Luciferase assay//Microarray//Northern blot//qRT-PCR	19582816	Unspecified
mmu-mir-692	MIMAT0003471	Phactr1	218194	HITS-CLIP	23597149	Unspecified
mmu-mir-1192	MIMAT0005850	Mef2c	17260	HITS-CLIP	25083871	Unspecified
mmu-mir-200b-3p	MIMAT0000233	Map2	17756	HITS-CLIP	25083871	Unspecified
mmu-let-7b-5p	MIMAT0000522	Syncrip	56403	Sequencing	19536157	Unspecified
mmu-mir-297a-5p	MIMAT0000375	Ttyh1	57776	Sequencing	19536157	Unspecified
mmu-let-7b-5p	MIMAT0000522	Smcr8	237782	Sequencing	19536157	Unspecified
mmu-let-7b-5p	MIMAT0000522	Zfp12	231866	Sequencing	19536157	Unspecified
mmu-mir-297a-5p	MIMAT0000375	Psd3	234353	Sequencing	19536157	Unspecified
mmu-mir-297a-5p	MIMAT0000375	Rad21	19357	Sequencing	19536157	Unspecified
mmu-mir-297a-5p	MIMAT0000375	Pik3r1	18708	Sequencing	19536157	Unspecified
mmu-mir-297a-5p	MIMAT0000375	Snap25	20614	HITS-CLIP	25083871	Unspecified
mmu-mir-297a-5p	MIMAT0000375	Mical3	194401	Sequencing	19536157	Unspecified
mmu-mir-692	MIMAT0003471	Rgs7bp	52882	HITS-CLIP	23597149	Unspecified
mmu-mir-297a-5p	MIMAT0000375	Pik3r3	18710	Sequencing	19536157	Unspecified
mmu-mir-29b-3p	MIMAT0000127	Zfp26	22688	HITS-CLIP	25083871	Unspecified
mmu-let-7b-5p	MIMAT0000522	Tgfbr1	21812	Sequencing	19536157	Unspecified
mmu-mir-181b-5p	MIMAT0000673	Snx25	102141	Microarray	18762567	Unspecified
mmu-let-7b-5p	MIMAT0000522	Snx30	209131	Sequencing	19536157	Unspecified
mmu-mir-297a-5p	MIMAT0000375	Xiap	11798	Sequencing	19536157	Unspecified
mmu-let-7b-5p	MIMAT0000522	Thrsp	21835	Sequencing	19536157	Unspecified
mmu-let-7b-5p	MIMAT0000522	Stat2	20847	Sequencing	19536157	Unspecified
mmu-mir-297a-5p	MIMAT0000375	Lss	16987	Sequencing	19536157	Unspecified
mmu-mir-181b-5p	MIMAT0000673	Timp3	21859	Luciferase assay//qRT-PCR//Western blot	20023698	Unspecified
mmu-let-7b-5p	MIMAT0000522	Stk35	67333	Sequencing	19536157	Unspecified
mmu-mir-692	MIMAT0003471	Lhx5	16873	HITS-CLIP	25083871	Unspecified
mmu-mir-297a-5p	MIMAT0000375	Zhx1	22770	Sequencing	19536157	Unspecified
mmu-let-7b-5p	MIMAT0000522	Ubxn4	67812	Sequencing	19536157	Unspecified
mmu-mir-297a-5p	MIMAT0000375	Spag9	70834	Sequencing	19536157	Unspecified
mmu-mir-133a-3p	MIMAT0000145	Ucp2	22228	Luciferase assay//qRT-PCR//Western blot	19073597	Unspecified
mmu-mir-29b-3p	MIMAT0000127	Sparc	20692	HITS-CLIP	23142080	Unspecified
mmu-mir-29c-3p	MIMAT0000536	Sparc	20692	HITS-CLIP	23142080	Unspecified
mmu-mir-297a-5p	MIMAT0000375	Lingo3	237403	Sequencing	19536157	Unspecified
mmu-mir-692	MIMAT0003471	Spock2	94214	HITS-CLIP	21258322	Unspecified
mmu-mir-133a-3p	MIMAT0000145	Spry1	24063	Luciferase assay	19043405	Unspecified
mmu-mir-297a-5p	MIMAT0000375	Sharpin	106025	Sequencing	19536157	Unspecified
mmu-mir-1192	MIMAT0005850	Lnp	69605	HITS-CLIP	25083871	Unspecified
mmu-mir-664-3p	MIMAT0012774	Zfp62	22720	HITS-CLIP	23142080	Unspecified
mmu-mir-1192	MIMAT0005850	Onecut2	225631	HITS-CLIP	25083871	Unspecified
mmu-mir-200b-3p	MIMAT0000233	Zeb2	24136	Reporter assay	21049046	Unspecified
mmu-let-7b-5p	MIMAT0000522	Srcin1	56013	Sequencing	19536157	Unspecified
mmu-mir-133a-3p	MIMAT0000145	Pola1	18968	Immunofluorescence//Luciferase assay//Microarray//Western blot	16923828	Unspecified
mmu-let-7b-5p	MIMAT0000522	Srek1	218543	Sequencing	19536157	Unspecified
mmu-let-7b-5p	MIMAT0000522	Tmem2	83921	Sequencing	19536157	Unspecified
mmu-mir-297a-5p	MIMAT0000375	Zfp697	242109	Sequencing	19536157	Unspecified
mmu-mir-297a-5p	MIMAT0000375	Synj1	104015	Sequencing	19536157	Unspecified
mmu-mir-297a-5p	MIMAT0000375	Nxt2	237082	Sequencing	19536157	Unspecified
mmu-let-7b-5p	MIMAT0000522	Ylpm1	56531	Sequencing	19536157	Unspecified
mmu-mir-297a-5p	MIMAT0000375	Zfp748	212276	Sequencing	19536157	Unspecified
mmu-mir-297a-5p	MIMAT0000375	Rab9b	319642	HITS-CLIP	21258322	Unspecified
mmu-let-7b-5p	MIMAT0000522	Tram1l1	229801	Sequencing	19536157	Unspecified
mmu-let-7b-5p	MIMAT0000522	Psd3	234353	Sequencing	19536157	Unspecified
mmu-let-7b-5p	MIMAT0000522	Ssh1	231637	Sequencing	19536157	Unspecified
mmu-let-7b-5p	MIMAT0000522	Ppm1e	320472	Sequencing	19536157	Unspecified
mmu-mir-674-5p	MIMAT0003740	Ssr1	107513	HITS-CLIP	21258322	Unspecified
mmu-mir-297a-5p	MIMAT0000375	Zfp217	228913	Sequencing	19536157	Unspecified
mmu-mir-297a-5p	MIMAT0000375	Micu2	68514	Sequencing	19536157	Unspecified
mmu-mir-297a-5p	MIMAT0000375	Rgs8	67792	HITS-CLIP	23142080	Unspecified
mmu-mir-297a-5p	MIMAT0000375	Rgs8	67792	HITS-CLIP	25083871	Unspecified
mmu-let-7b-5p	MIMAT0000522	Tor1aip2	240832	Sequencing	19536157	Unspecified
mmu-mir-664-3p	MIMAT0012774	Rhbdl1	214951	HITS-CLIP	23142080	Unspecified
mmu-mir-674-5p	MIMAT0003740	Slc7a14	241919	HITS-CLIP	21258322	Unspecified
mmu-let-7b-5p	MIMAT0000522	Tmem194	210035	Sequencing	19536157	Unspecified
mmu-mir-133a-3p	MIMAT0000145	Runx2	12393	Luciferase assay//qRT-PCR//Western blot	18784367	Unspecified
mmu-mir-297a-5p	MIMAT0000375	Taok1	216965	Sequencing	19536157	Unspecified
mmu-mir-692	MIMAT0003471	Zfp937	245174	HITS-CLIP	21258322	Unspecified
mmu-mir-297a-5p	MIMAT0000375	Ostm1	14628	Sequencing	19536157	Unspecified
mmu-mir-297a-5p	MIMAT0000375	Slc1a2	20511	HITS-CLIP	23597149	Unspecified
mmu-let-7b-5p	MIMAT0000522	Slc20a1	20515	Sequencing	19536157	Unspecified
mmu-mir-297a-5p	MIMAT0000375	Oxtr	18430	Sequencing	19536157	Unspecified
mmu-mir-692	MIMAT0003471	Rassf3	192678	HITS-CLIP	25083871	Unspecified
mmu-let-7b-5p	MIMAT0000522	Stx17	67727	Sequencing	19536157	Unspecified
mmu-let-7b-5p	MIMAT0000522	Zkscan2	210162	Sequencing	19536157	Unspecified
mmu-let-7b-5p	MIMAT0000522	Stx3	20908	Sequencing	19536157	Unspecified
mmu-mir-297a-5p	MIMAT0000375	Pura	19290	Sequencing	19536157	Unspecified
mmu-let-7b-5p	MIMAT0000522	Thbs1	21825	Sequencing	19536157	Unspecified
mmu-mir-692	MIMAT0003471	Nptx1	18164	HITS-CLIP	21258322	Unspecified
mmu-mir-297a-5p	MIMAT0000375	Whsc1	107823	HITS-CLIP	25083871	Unspecified
mmu-mir-674-5p	MIMAT0003740	Magt1	67075	HITS-CLIP	25083871	Unspecified
mmu-mir-692	MIMAT0003471	Magt1	67075	HITS-CLIP	23597149	Unspecified
mmu-mir-692	MIMAT0003471	Magt1	67075	HITS-CLIP	25083871	Unspecified
mmu-mir-297a-5p	MIMAT0000375	Robo2	268902	Sequencing	19536157	Unspecified
mmu-let-7b-5p	MIMAT0000522	Rock2	19878	Sequencing	19536157	Unspecified
mmu-mir-674-5p	MIMAT0003740	Prps2	110639	HITS-CLIP	25083871	Unspecified
mmu-mir-200b-3p	MIMAT0000233	Suz12	52615	Immunofluorescence//Immunoprecipitaion//In situ hybridization//Luciferase assay//Western blot	20832727	Unspecified
mmu-mir-297a-5p	MIMAT0000375	Sv2a	64051	Sequencing	19536157	Unspecified
mmu-mir-200b-3p	MIMAT0000233	Zeb2	24136	Luciferase assay	24245745	Unspecified
mmu-let-7b-5p	MIMAT0000522	Maneal	215090	Sequencing	19536157	Unspecified
mmu-mir-297a-5p	MIMAT0000375	Mansc1	67729	Sequencing	19536157	Unspecified
mmu-let-7b-5p	MIMAT0000522	Rnf167	70510	Sequencing	19536157	Unspecified
mmu-mir-1192	MIMAT0005850	Pcdhb17	93888	HITS-CLIP	25083871	Unspecified
mmu-let-7b-5p	MIMAT0000522	Psme4	103554	Sequencing	19536157	Unspecified
mmu-mir-674-5p	MIMAT0003740	Ppp2r2c	269643	HITS-CLIP	25083871	Unspecified
mmu-mir-297a-5p	MIMAT0000375	Vps37a	52348	HITS-CLIP	23597149	Unspecified
mmu-mir-297a-5p	MIMAT0000375	Plaa	18786	Sequencing	19536157	Unspecified
mmu-let-7b-5p	MIMAT0000522	Prdm1	12142	Sequencing	19536157	Unspecified
mmu-let-7b-5p	MIMAT0000522	Tbc1d14	100855	Sequencing	19536157	Unspecified
mmu-let-7b-5p	MIMAT0000522	Ptprd	19266	Sequencing	19536157	Unspecified
mmu-mir-1192	MIMAT0005850	Ptprg	19270	HITS-CLIP	25083871	Unspecified
mmu-let-7b-5p	MIMAT0000522	Zfp641	239652	Sequencing	19536157	Unspecified
mmu-mir-297a-5p	MIMAT0000375	Slc39a9	328133	Sequencing	19536157	Unspecified
mmu-mir-103-3p	MIMAT0000546	Nf1	18015	Luciferase assay	23056445	Unspecified
mmu-mir-297a-5p	MIMAT0000375	Scd2	20250	Sequencing	19536157	Unspecified
mmu-mir-297a-5p	MIMAT0000375	Qk	19317	Sequencing	19536157	Unspecified
mmu-let-7b-5p	MIMAT0000522	Pgrmc1	53328	Sequencing	19536157	Unspecified
mmu-mir-29b-3p	MIMAT0000127	Tgfb3	21809	Luciferase assay//Microarray//Northern blot//qRT-PCR//Western blot	19342382	Unspecified
mmu-let-7b-5p	MIMAT0000522	Zfp644	52397	Sequencing	19536157	Unspecified
mmu-mir-297a-5p	MIMAT0000375	Zeb2	24136	HITS-CLIP	25083871	Unspecified
mmu-mir-674-5p	MIMAT0003740	Rab33b	19338	HITS-CLIP	21258322	Unspecified
mmu-mir-181b-5p	MIMAT0000673	Smarca4	20586	HITS-CLIP	23597149	Unspecified
mmu-mir-181b-5p	MIMAT0000673	Smarca4	20586	HITS-CLIP	25083871	Unspecified
mmu-let-7b-5p	MIMAT0000522	Mtpn	14489	GFP reporter assay//Luciferase assay//Western blot//Reporter assay//Other	15806104	Unspecified
mmu-let-7b-5p	MIMAT0000522	Tgs1	116940	Sequencing	19536157	Unspecified
mmu-mir-297a-5p	MIMAT0000375	Tgs1	116940	Sequencing	19536157	Unspecified
mmu-mir-23b-3p	MIMAT0000125	Nrp2	18187	HITS-CLIP	23597149	Unspecified
mmu-mir-23b-3p	MIMAT0000125	Nrp2	18187	HITS-CLIP	23142080	Unspecified
mmu-mir-692	MIMAT0003471	Myo1c	17913	HITS-CLIP	21258322	Unspecified
mmu-mir-297a-5p	MIMAT0000375	Syngr3	20974	Sequencing	19536157	Unspecified
mmu-mir-692	MIMAT0003471	Tmem8b	242409	HITS-CLIP	23597149	Unspecified
mmu-let-7b-5p	MIMAT0000522	Tmem214	68796	Sequencing	19536157	Unspecified
mmu-mir-297a-5p	MIMAT0000375	Rab9b	319642	HITS-CLIP	23597149	Unspecified
mmu-mir-297a-5p	MIMAT0000375	Tenm2	23964	Sequencing	19536157	Unspecified
mmu-let-7b-5p	MIMAT0000522	Syt11	229521	Sequencing	19536157	Unspecified
mmu-let-7b-5p	MIMAT0000522	Zfp248	72720	Sequencing	19536157	Unspecified
mmu-mir-1192	MIMAT0005850	Tacc1	320165	HITS-CLIP	25083871	Unspecified
mmu-mir-1192	MIMAT0005850	Ranbp3l	223332	HITS-CLIP	25083871	Unspecified
mmu-mir-297a-5p	MIMAT0000375	Ranbp3l	223332	Sequencing	19536157	Unspecified
mmu-mir-297a-5p	MIMAT0000375	Tmem19	67226	Sequencing	19536157	Unspecified
mmu-mir-133a-3p	MIMAT0000145	Rhoa	11848	Luciferase assay//Western blot	20056941	Unspecified
mmu-mir-297a-5p	MIMAT0000375	Stambp	70527	Sequencing	19536157	Unspecified
mmu-mir-297a-5p	MIMAT0000375	Srl	106393	Sequencing	19536157	Unspecified
mmu-let-7b-5p	MIMAT0000522	Slc24a2	76376	Sequencing	19536157	Unspecified
mmu-let-7b-5p	MIMAT0000522	Serf2	378702	Sequencing	19536157	Unspecified
mmu-mir-181b-5p	MIMAT0000673	Ndrg1	17988	Microarray	18762567	Unspecified
mmu-let-7b-5p	MIMAT0000522	Tmed5	73130	Sequencing	19536157	Unspecified
mmu-mir-297a-5p	MIMAT0000375	Vps37a	52348	HITS-CLIP	19536157	Unspecified
mmu-let-7b-5p	MIMAT0000522	Zfp354b	27274	Sequencing	19536157	Unspecified
mmu-mir-1192	MIMAT0005850	Sall1	58198	HITS-CLIP	25083871	Unspecified
mmu-mir-1192	MIMAT0005850	Samd8	67630	HITS-CLIP	21258322	Unspecified
mmu-mir-297a-5p	MIMAT0000375	Rnf103	22644	Sequencing	19536157	Unspecified
mmu-mir-200b-3p	MIMAT0000233	Zeb2	24136	Reporter assay	18411277	Unspecified
mmu-mir-133a-3p	MIMAT0000145	Rhoa	11848	Luciferase assay//Microarray//Northern blot//Western blot	17468766	Unspecified
mmu-mir-674-5p	MIMAT0003740	Myo1c	17913	HITS-CLIP	21258322	Unspecified
mmu-let-7b-5p	MIMAT0000522	Zfp462	242466	Sequencing	19536157	Unspecified
mmu-mir-297a-5p	MIMAT0000375	Tnks	21951	Sequencing	19536157	Unspecified
mmu-mir-692	MIMAT0003471	Tmem8b	242409	HITS-CLIP	19536157	Unspecified
mmu-mir-692	MIMAT0003471	Tmem8b	242409	HITS-CLIP	25083871	Unspecified
mmu-mir-692	MIMAT0003471	Tmem8b	242409	HITS-CLIP	26203562	Unspecified
mmu-let-7b-5p	MIMAT0000522	Zfp318	57908	Sequencing	19536157	Unspecified
mmu-mir-297a-5p	MIMAT0000375	Spire1	68166	Sequencing	19536157	Unspecified
mmu-mir-1192	MIMAT0005850	Slco5a1	240726	HITS-CLIP	25083871	Unspecified
mmu-let-7b-5p	MIMAT0000522	Rnf44	105239	Sequencing	19536157	Unspecified
mmu-let-7b-5p	MIMAT0000522	Pnkd	56695	Sequencing	19536157	Unspecified
mmu-mir-1192	MIMAT0005850	Rcan3	53902	HITS-CLIP	21258322	Unspecified
mmu-let-7b-5p	MIMAT0000522	Zeb2	24136	Sequencing	19536157	Unspecified
mmu-let-7b-5p	MIMAT0000522	Nid1	18073	Sequencing	19536157	Unspecified
mmu-mir-200b-3p	MIMAT0000233	Zeb2	24136	Immunoblot//Microarray//qRT-PCR	21079000	Unspecified
mmu-mir-200b-3p	MIMAT0000233	Zeb2	24136	Luciferase assay//Western blot	17585049	Unspecified
mmu-mir-297a-5p	MIMAT0000375	Vezt	215008	Sequencing	19536157	Unspecified
mmu-let-7b-5p	MIMAT0000522	Rdx	19684	Sequencing	19536157	Unspecified
mmu-let-7b-5p	MIMAT0000522	Syn3	27204	Sequencing	19536157	Unspecified
mmu-let-7b-5p	MIMAT0000522	Usp45	77593	Sequencing	19536157	Unspecified
mmu-mir-674-5p	MIMAT0003740	Tbc1d24	18209	HITS-CLIP	21258322	Unspecified
mmu-let-7b-5p	MIMAT0000522	Trim6	94088	Sequencing	19536157	Unspecified
mmu-let-7b-5p	MIMAT0000522	Rffl	67338	Sequencing	19536157	Unspecified
mmu-let-7b-5p	MIMAT0000522	Slitrk4	245446	Sequencing	19536157	Unspecified
mmu-mir-3076-3p	MIMAT0014861	Zfp365	216049	HITS-CLIP	21258322	Unspecified
mmu-mir-297a-5p	MIMAT0000375	Ski	20481	Sequencing	19536157	Unspecified
mmu-mir-297a-5p	MIMAT0000375	Ski	20481	HITS-CLIP	23597149	Unspecified
mmu-let-7b-5p	MIMAT0000522	Mtf1	17764	Sequencing	19536157	Unspecified
mmu-mir-103-3p	MIMAT0000546	Mtf1	17764	HITS-CLIP	25083871	Unspecified
mmu-let-7b-5p	MIMAT0000522	Trib2	217410	Sequencing	19536157	Unspecified
mmu-mir-664-3p	MIMAT0012774	Rgs4	19736	HITS-CLIP	25083871	Unspecified
mmu-mir-674-5p	MIMAT0003740	Ppm1k	243382	HITS-CLIP	21258322	Unspecified
mmu-mir-29c-3p	MIMAT0000536	Zfp26	22688	HITS-CLIP	25083871	Unspecified
mmu-let-7b-5p	MIMAT0000522	Mtmr4	170749	Sequencing	19536157	Unspecified
mmu-mir-297a-5p	MIMAT0000375	Mtmr6	219135	Sequencing	19536157	Unspecified
mmu-mir-297a-5p	MIMAT0000375	Wsb1	78889	Sequencing	19536157	Unspecified
mmu-let-7b-5p	MIMAT0000522	Stim1	20866	Sequencing	19536157	Unspecified
mmu-mir-297a-5p	MIMAT0000375	Nptx1	18164	Sequencing	19536157	Unspecified
mmu-mir-664-3p	MIMAT0012774	Slc16a9	66859	HITS-CLIP	25083871	Unspecified
mmu-mir-297a-5p	MIMAT0000375	Serpini1	20713	Sequencing	19536157	Unspecified
mmu-mir-297a-5p	MIMAT0000375	Tspan9	109246	Sequencing	19536157	Unspecified
mmu-mir-297a-5p	MIMAT0000375	Slc6a6	21366	HITS-CLIP	23597149	Unspecified
mmu-mir-297a-5p	MIMAT0000375	Trp53bp1	27223	Sequencing	19536157	Unspecified
mmu-mir-297a-5p	MIMAT0000375	Slc6a7	240332	Sequencing	19536157	Unspecified
mmu-let-7b-5p	MIMAT0000522	Slc6a8	102857	Sequencing	19536157	Unspecified
mmu-mir-297a-5p	MIMAT0000375	Wnk1	232341	Sequencing	19536157	Unspecified
mmu-mir-1192	MIMAT0005850	Tcf7	21414	HITS-CLIP	25083871	Unspecified
mmu-mir-297a-5p	MIMAT0000375	Slc29a4	243328	Sequencing	19536157	Unspecified
mmu-let-7b-5p	MIMAT0000522	Patl1	225929	Sequencing	19536157	Unspecified
mmu-let-7b-5p	MIMAT0000522	Trps1	83925	Sequencing	19536157	Unspecified
mmu-mir-1192	MIMAT0005850	Zic1	22771	HITS-CLIP	25083871	Unspecified
mmu-mir-23b-3p	MIMAT0000125	Nrp2	18187	HITS-CLIP	21258322	Unspecified
mmu-mir-181b-5p	MIMAT0000673	Ulk3	71742	Microarray	18762567	Unspecified
mmu-mir-5113	MIMAT0020621	Ulk3	71742	HITS-CLIP	21258322	Unspecified
mmu-let-7b-5p	MIMAT0000522	Slitrk5	75409	Sequencing	19536157	Unspecified
mmu-mir-297a-5p	MIMAT0000375	Zscan22	232878	Sequencing	19536157	Unspecified
mmu-let-7b-5p	MIMAT0000522	Zscan22	232878	Sequencing	19536157	Unspecified
mmu-mir-297a-5p	MIMAT0000375	Sulf2	72043	Sequencing	19536157	Unspecified
mmu-mir-297a-5p	MIMAT0000375	Whsc1l1	234135	HITS-CLIP	25083871	Unspecified
mmu-mir-297a-5p	MIMAT0000375	Whsc1l1	234135	HITS-CLIP	23597149	Unspecified
mmu-mir-297a-5p	MIMAT0000375	Slk	20874	Sequencing	19536157	Unspecified
mmu-mir-5113	MIMAT0020621	Zfp26	22688	HITS-CLIP	21258322	Unspecified
mmu-mir-297a-5p	MIMAT0000375	Tgoln1	22135	Sequencing	19536157	Unspecified
mmu-mir-23b-3p	MIMAT0000125	Nrp2	18187	HITS-CLIP	26203562	Unspecified
mmu-let-7b-5p	MIMAT0000522	Synj1	104015	Sequencing	19536157	Unspecified
mmu-mir-297a-5p	MIMAT0000375	Wwtr1	97064	Sequencing	19536157	Unspecified
mmu-let-7b-5p	MIMAT0000522	Slco5a1	240726	Sequencing	19536157	Unspecified
mmu-mir-674-5p	MIMAT0003740	Ywhag	22628	HITS-CLIP	23142080	Unspecified
mmu-let-7b-5p	MIMAT0000522	Zfp174	385674	Sequencing	19536157	Unspecified
mmu-mir-29b-3p	MIMAT0000127	Tnfaip3	21929	Immunoblot//Immunocytochemistry//Luciferase assay//Microarray//qRT-PCR	24236890	Unspecified
mmu-mir-664-3p	MIMAT0012774	Wdr59	319481	HITS-CLIP	21258322	Unspecified
mmu-mir-297a-5p	MIMAT0000375	Zc3h12b	547176	Sequencing	19536157	Unspecified
mmu-mir-297a-5p	MIMAT0000375	Tgfbr1	21812	Sequencing	19536157	Unspecified
mmu-mir-133a-3p	MIMAT0000145	Zfp26	22688	HITS-CLIP	23142080	Unspecified
mmu-mir-297a-5p	MIMAT0000375	Tgoln1	22134	Sequencing	19536157	Unspecified
mmu-mir-297a-5p	MIMAT0000375	Rxfp1	381489	Sequencing	19536157	Unspecified
mmu-let-7b-5p	MIMAT0000522	Wdtc1	230796	Sequencing	19536157	Unspecified
mmu-mir-297a-5p	MIMAT0000375	Tbc1d19	67249	Sequencing	19536157	Unspecified
mmu-mir-297a-5p	MIMAT0000375	Zbtb39	320080	HITS-CLIP	25083871	Unspecified
mmu-mir-297a-5p	MIMAT0000375	Tmem87b	72477	Sequencing	19536157	Unspecified
mmu-let-7b-5p	MIMAT0000522	Zc3h11a	70579	Sequencing	19536157	Unspecified
mmu-let-7b-5p	MIMAT0000522	Zfp280b	64453	Sequencing	19536157	Unspecified
mmu-mir-1192	MIMAT0005850	Slc8a1	20541	HITS-CLIP	25083871	Unspecified
mmu-let-7b-5p	MIMAT0000522	Zfp109	56869	Sequencing	19536157	Unspecified
mmu-mir-181b-5p	MIMAT0000673	Slc35d3	76157	Microarray	18762567	Unspecified
mmu-mir-297a-5p	MIMAT0000375	Ssbp2	66970	Sequencing	19536157	Unspecified
mmu-mir-23b-3p	MIMAT0000125	Smad3	17127	Luciferase assay	20216554	Unspecified
mmu-mir-1192	MIMAT0005850	Scn3a	20269	HITS-CLIP	25083871	Unspecified
mmu-mir-23b-3p	MIMAT0000125	Smad4	17128	In situ hybridization//Luciferase assay//Microarray//Northern blot//qRT-PCR	19582816	Unspecified
mmu-mir-23b-3p	MIMAT0000125	Smad5	17129	In situ hybridization//Luciferase assay//Microarray//Northern blot//qRT-PCR	19582816	Unspecified
mmu-mir-692	MIMAT0003471	Stx17	67727	HITS-CLIP	21258322	Unspecified
mmu-let-7b-5p	MIMAT0000522	Sacm1l	83493	Sequencing	19536157	Unspecified
mmu-mir-29b-3p	MIMAT0000127	Zbtb5	230119	HITS-CLIP	23142080	Unspecified
mmu-let-7b-5p	MIMAT0000522	Zfp9	22750	Sequencing	19536157	Unspecified
mmu-mir-297a-5p	MIMAT0000375	Smek2	104570	Sequencing	19536157	Unspecified
mmu-let-7b-5p	MIMAT0000522	Nlk	18099	Sequencing	19536157	Unspecified
mmu-mir-692	MIMAT0003471	Sgms1	208449	HITS-CLIP	25083871	Unspecified
mmu-mir-200b-3p	MIMAT0000233	Zeb1	21417	qRT-PCR//Luciferase assay	19787069	Unspecified
mmu-mir-23b-3p	MIMAT0000125	Smad5	17129	Luciferase assay	20216554	Unspecified
mmu-mir-297a-5p	MIMAT0000375	Sema6a	20358	HITS-CLIP	21258322	Unspecified
mmu-mir-297a-5p	MIMAT0000375	Snap25	20614	HITS-CLIP	21258322	Unspecified
mmu-mir-200b-3p	MIMAT0000233	Zeb1	21417	Reporter assay	21049046	Unspecified
mmu-mir-200b-3p	MIMAT0000233	Zeb1	21417	Reporter assay	18411277	Unspecified
mmu-mir-297a-5p	MIMAT0000375	Vldlr	22359	Sequencing	19536157	Unspecified
mmu-let-7b-5p	MIMAT0000522	Zdhhc24	70605	Sequencing	19536157	Unspecified
mmu-mir-692	MIMAT0003471	Tnrc6c	217351	HITS-CLIP	25083871	Unspecified
mmu-mir-200b-3p	MIMAT0000233	Zeb1	21417	Immunoblot//Microarray//qRT-PCR	21079000	Unspecified
mmu-mir-29c-3p	MIMAT0000536	Zbtb5	230119	HITS-CLIP	23142080	Unspecified
mmu-let-7b-5p	MIMAT0000522	Sh2b3	16923	Sequencing	19536157	Unspecified
mmu-mir-297a-5p	MIMAT0000375	Vps39	269338	Sequencing	19536157	Unspecified
mmu-let-7b-5p	MIMAT0000522	Ubap2	68926	Sequencing	19536157	Unspecified
mmu-let-7b-5p	MIMAT0000522	Xkr8	381560	Sequencing	19536157	Unspecified
mmu-mir-200b-3p	MIMAT0000233	Zeb1	21417	Luciferase assay//qRT-PCR//Western blot///Chromatin Immunoprecipitation (ChIP) Assays	22247255	Unspecified
mmu-let-7b-5p	MIMAT0000522	Tspan2	70747	Sequencing	19536157	Unspecified
mmu-let-7b-5p	MIMAT0000522	Unc80	329178	Sequencing	19536157	Unspecified
mmu-let-7b-5p	MIMAT0000522	Zswim5	74464	Sequencing	19536157	Unspecified
mmu-mir-297a-5p	MIMAT0000375	Zfp652	268469	Sequencing	19536157	Unspecified
mmu-mir-181b-5p	MIMAT0000673	Sgpp1	81535	HITS-CLIP	25083871	Unspecified
mmu-let-7b-5p	MIMAT0000522	Srrm4	68955	Sequencing	19536157	Unspecified
mmu-mir-297a-5p	MIMAT0000375	Paqr8	74229	Sequencing	19536157	Unspecified
mmu-mir-674-5p	MIMAT0003740	Prps2	110639	HITS-CLIP	26203562	Unspecified
mmu-mir-674-5p	MIMAT0003740	Prps2	110639	HITS-CLIP	23142080	Unspecified
mmu-mir-692	MIMAT0003471	Rad54l2	81000	HITS-CLIP	23597149	Unspecified
mmu-mir-1192	MIMAT0005850	Slc25a51	230125	HITS-CLIP	21258322	Unspecified
mmu-mir-181b-5p	MIMAT0000673	Spp1	20750	HITS-CLIP	25083871	Unspecified
mmu-mir-1192	MIMAT0005850	Wipf2	68524	HITS-CLIP	21258322	Unspecified
mmu-let-7b-5p	MIMAT0000522	Zfp583	213011	Sequencing	19536157	Unspecified
mmu-mir-1192	MIMAT0005850	Zfp106	20402	HITS-CLIP	25083871	Unspecified
mmu-mir-297a-5p	MIMAT0000375	Tgfa	21802	Sequencing	19536157	Unspecified
mmu-mir-297a-5p	MIMAT0000375	Tmem255a	245386	Sequencing	19536157	Unspecified
mmu-let-7b-5p	MIMAT0000522	Tenm2	23964	Sequencing	19536157	Unspecified
mmu-mir-297a-5p	MIMAT0000375	Zbtb34	241311	Sequencing	19536157	Unspecified
mmu-mir-23b-3p	MIMAT0000125	Smad4	17128	Luciferase assay	20216554	Unspecified
mmu-mir-297a-5p	MIMAT0000375	Xpot	73192	Sequencing	19536157	Unspecified
mmu-mir-297a-5p	MIMAT0000375	Tceb3	27224	Sequencing	19536157	Unspecified
mmu-mir-692	MIMAT0003471	Zkscan1	74570	HITS-CLIP	21258322	Unspecified
mmu-let-7b-5p	MIMAT0000522	Slc25a18	71803	Sequencing	19536157	Unspecified
mmu-let-7b-5p	MIMAT0000522	Tubb4a	22153	Sequencing	19536157	Unspecified
mmu-let-7b-5p	MIMAT0000522	Ptpru	19273	Sequencing	19536157	Unspecified
mmu-mir-297a-5p	MIMAT0000375	Ulk1	22241	Sequencing	19536157	Unspecified
mmu-let-7b-5p	MIMAT0000522	Vav3	57257	Sequencing	19536157	Unspecified
mmu-mir-181b-5p	MIMAT0000673	Smarca4	20586	HITS-CLIP	23142080	Unspecified
mmu-mir-297a-5p	MIMAT0000375	Snap25	20614	Sequencing	19536157	Unspecified
mmu-mir-297a-5p	MIMAT0000375	Zfp160	224585	Sequencing	19536157	Unspecified
mmu-let-7b-5p	MIMAT0000522	Slc2a3	20527	Sequencing	19536157	Unspecified
mmu-mir-181b-5p	MIMAT0000673	Uchl1	22223	Luciferase assay//qRT-PCR//Western blot	23900885	Unspecified
mmu-mir-103-3p	MIMAT0000546	Klc1	16593	HITS-CLIP	21258322	Unspecified
mmu-mir-103-3p	MIMAT0000546	Klc1	16593	HITS-CLIP	23597149	Unspecified
mmu-mir-23b-3p	MIMAT0000125	Fam126b	213056	HITS-CLIP	23142080	Unspecified
mmu-mir-692	MIMAT0003471	Dsg2	13511	HITS-CLIP	21258322	Unspecified
mmu-mir-692	MIMAT0003471	Dsg2	13511	HITS-CLIP	19536157	Unspecified
mmu-mir-692	MIMAT0003471	Dsg2	13511	HITS-CLIP	25083871	Unspecified
mmu-mir-692	MIMAT0003471	Dsg2	13511	HITS-CLIP	23597149	Unspecified
mmu-mir-29b-3p	MIMAT0000127	Hif3a	53417	HITS-CLIP	21258322	Unspecified
mmu-mir-29c-3p	MIMAT0000536	Hif3a	53417	HITS-CLIP	21258322	Unspecified
mmu-mir-29b-3p	MIMAT0000127	Hif3a	53417	HITS-CLIP	23597149	Unspecified
mmu-mir-29c-3p	MIMAT0000536	Hif3a	53417	HITS-CLIP	25083871	Unspecified
mmu-mir-29b-3p	MIMAT0000127	Hif3a	53417	HITS-CLIP	25083871	Unspecified
mmu-mir-29c-3p	MIMAT0000536	Hif3a	53417	HITS-CLIP	23597149	Unspecified
mmu-mir-29b-3p	MIMAT0000127	Tbx21	57775	Luciferase assay//Microarray//qRT-PCR	21820330	Unspecified
mmu-mir-181b-5p	MIMAT0000673	Nacc1	66849	HITS-CLIP	23142080	Unspecified
mmu-mir-29b-3p	MIMAT0000127	Cisd2	67006	HITS-CLIP	21258322	Unspecified
mmu-mir-29b-3p	MIMAT0000127	Cisd2	67008	HITS-CLIP	25083871	Unspecified
mmu-mir-29b-3p	MIMAT0000127	Pigt	78928	HITS-CLIP	21258322	Unspecified
mmu-mir-29b-3p	MIMAT0000127	Lactb2	212442	HITS-CLIP	21258322	Unspecified
mmu-mir-103-3p	MIMAT0000546	Mbtps2	270669	HITS-CLIP	25083871	Unspecified
mmu-let-7b-5p	MIMAT0000522	Tnfrsf26	244237	HITS-CLIP	21258322	Unspecified
mmu-let-7c-5p	MIMAT0000523	Tnfrsf26	244237	HITS-CLIP	21258322	Unspecified
mmu-let-7b-5p	MIMAT0000522	Mup17	100039089	HITS-CLIP	23597149	Unspecified
mmu-let-7b-5p	MIMAT0000522	Mup17	100048885	HITS-CLIP	23597149	Unspecified
mmu-let-7b-5p	MIMAT0000522	Mup17	100039206	HITS-CLIP	23597149	Unspecified
mmu-let-7c-5p	MIMAT0000523	Mup17	100039089	HITS-CLIP	23597149	Unspecified
mmu-let-7c-5p	MIMAT0000523	Mup17	100048885	HITS-CLIP	23597149	Unspecified
mmu-let-7c-5p	MIMAT0000523	Mup17	100039206	HITS-CLIP	23597149	Unspecified
mmu-let-7c-5p	MIMAT0000523	Mup11	100039028	HITS-CLIP	23597149	Unspecified
mmu-let-7b-5p	MIMAT0000522	Mup11	665622	HITS-CLIP	23597149	Unspecified
mmu-mir-29b-3p	MIMAT0000127	Col4a5	12830	Luciferase assay//qRT-PCR//Western blot	23139829	Unspecified
mmu-mir-181b-5p	MIMAT0000673	Hspa5	14829	Luciferase assay//qRT-PCR//Western blot	23900885	Unspecified
mmu-let-7b-5p	MIMAT0000522	1600012H06Rik	67912	Sequencing	19536157	Unspecified
mmu-let-7b-5p	MIMAT0000522	1600012H06Rik	67912	Sequencing	tarbase	Unspecified
mmu-let-7b-5p	MIMAT0000522	1700017B05Rik	74211	Sequencing	tarbase	Unspecified
mmu-let-7b-5p	MIMAT0000522	1700017B05Rik	74211	Sequencing	19536157	Unspecified
mmu-let-7b-5p	MIMAT0000522	Gramd1b	235283	Sequencing	tarbase	Unspecified
mmu-let-7b-5p	MIMAT0000522	Abcc5	27416	Sequencing	19536157	Unspecified
mmu-let-7b-5p	MIMAT0000522	Abcc5	27416	Sequencing	tarbase	Unspecified
mmu-let-7b-5p	MIMAT0000522	Abcg1	11307	Sequencing	tarbase	Unspecified
mmu-let-7b-5p	MIMAT0000522	Abcg1	11307	Sequencing	19536157	Unspecified
mmu-let-7b-5p	MIMAT0000522	Csnk2a1	12995	Sequencing	tarbase	Unspecified
mmu-let-7b-5p	MIMAT0000522	Csnk2a1	12995	Sequencing	19536157	Unspecified
mmu-let-7b-5p	MIMAT0000522	Actg1	11465	Reporter assay	15131085	Unspecified
mmu-let-7b-5p	MIMAT0000522	Acvr1b	11479	Sequencing	tarbase	Unspecified
mmu-let-7b-5p	MIMAT0000522	Acvr1b	11479	Sequencing	19536157	Unspecified
mmu-mir-29b-3p	MIMAT0000127	Acvr2a	11480	Luciferase assay//Microarray//Northern blot//qRT-PCR//Western blot	19342382	Unspecified
mmu-mir-29b-3p	MIMAT0000127	Hdac4	208727	Luciferase assay//qRT-PCR//Western blot	21324893	Unspecified
mmu-let-7b-5p	MIMAT0000522	Adamts15	235130	Sequencing	tarbase	Unspecified
mmu-let-7b-5p	MIMAT0000522	Adamts15	235130	Sequencing	19536157	Unspecified
mmu-let-7b-5p	MIMAT0000522	Adipor2	68465	Sequencing	tarbase	Unspecified
mmu-let-7b-5p	MIMAT0000522	Adipor2	68465	Sequencing	19536157	Unspecified
mmu-let-7b-5p	MIMAT0000522	Adra2a	11551	Sequencing	19536157	Unspecified
mmu-let-7b-5p	MIMAT0000522	Adra2a	11551	Sequencing	tarbase	Unspecified
mmu-let-7b-5p	MIMAT0000522	Ago3	214150	Sequencing	19536157	Unspecified
mmu-let-7b-5p	MIMAT0000522	D630045J12Rik	330286	Sequencing	19536157	Unspecified
mmu-let-7b-5p	MIMAT0000522	Ddn	13199	Sequencing	19536157	Unspecified
mmu-let-7b-5p	MIMAT0000522	Ddn	13199	Sequencing	tarbase	Unspecified
mmu-mir-29b-3p	MIMAT0000127	Akt3	23797	Luciferase assay//qRT-PCR//Western blot	23764849	Unspecified
mmu-mir-29c-3p	MIMAT0000536	Akt3	23797	Luciferase assay//qRT-PCR//Western blot	23764849	Unspecified
mmu-let-7b-5p	MIMAT0000522	Nr6a1	14536	Sequencing	19536157	Unspecified
mmu-let-7b-5p	MIMAT0000522	Nr6a1	14536	Sequencing	tarbase	Unspecified
mmu-mir-181b-5p	MIMAT0000673	Ap1g1	11765	HITS-CLIP	25083871	Unspecified
mmu-let-7b-5p	MIMAT0000522	Apc2	23805	HITS-CLIP	25083871	Unspecified
mmu-let-7b-5p	MIMAT0000522	Apc2	23805	HITS-CLIP	23142080	Unspecified
mmu-let-7b-5p	MIMAT0000522	Apc2	23805	HITS-CLIP	21258322	Unspecified
mmu-let-7c-5p	MIMAT0000523	Apc2	23805	HITS-CLIP	25083871	Unspecified
mmu-let-7c-5p	MIMAT0000523	Apc2	23805	HITS-CLIP	21258322	Unspecified
mmu-let-7c-5p	MIMAT0000523	Apc2	23805	HITS-CLIP	23142080	Unspecified
mmu-let-7b-5p	MIMAT0000522	Dnajc27	217378	Sequencing	tarbase	Unspecified
mmu-let-7b-5p	MIMAT0000522	Dnajc27	217378	Sequencing	19536157	Unspecified
mmu-mir-29b-3p	MIMAT0000127	Dnmt3a	13435	Luciferase assay//mRAP//Northern blot	19509302	Unspecified
mmu-mir-29b-3p	MIMAT0000127	Dnmt3a	13435	qRT-PCR//Western blot	19959559	Unspecified
mmu-let-7b-5p	MIMAT0000522	Donson	60364	Sequencing	tarbase	Unspecified
mmu-let-7b-5p	MIMAT0000522	Arhgap1	228359	Sequencing	19536157	Unspecified
mmu-let-7b-5p	MIMAT0000522	Arhgap1	228359	Sequencing	tarbase	Unspecified
mmu-let-7b-5p	MIMAT0000522	Dusp1	19252	Sequencing	tarbase	Unspecified
mmu-let-7b-5p	MIMAT0000522	Dusp1	19252	Sequencing	19536157	Unspecified
mmu-let-7b-5p	MIMAT0000522	Arid3b	56380	Sequencing	19536157	Unspecified
mmu-let-7b-5p	MIMAT0000522	Arid3b	56380	Sequencing	tarbase	Unspecified
mmu-let-7b-5p	MIMAT0000522	Dusp6	67603	Sequencing	tarbase	Unspecified
mmu-let-7b-5p	MIMAT0000522	Arl5a	75423	Sequencing	tarbase	Unspecified
mmu-let-7b-5p	MIMAT0000522	Arl5a	75423	Sequencing	19536157	Unspecified
mmu-let-7b-5p	MIMAT0000522	Arpp19	59046	Sequencing	tarbase	Unspecified
mmu-let-7b-5p	MIMAT0000522	Arpp19	59046	Sequencing	19536157	Unspecified
mmu-mir-692	MIMAT0003471	Ash1l	192195	HITS-CLIP	21258322	Unspecified
mmu-let-7b-5p	MIMAT0000522	Atp2a2	11938	Sequencing	19536157	Unspecified
mmu-let-7b-5p	MIMAT0000522	Atp2a2	11938	Sequencing	tarbase	Unspecified
mmu-mir-181b-5p	MIMAT0000673	Atp2a2	11938	HITS-CLIP	25083871	Unspecified
mmu-let-7b-5p	MIMAT0000522	Atp6v1b2	11966	Sequencing	tarbase	Unspecified
mmu-let-7b-5p	MIMAT0000522	Atp6v1b2	11966	Sequencing	19536157	Unspecified
mmu-mir-297a-5p	MIMAT0000375	Azin1	54375	Sequencing	tarbase	Unspecified
mmu-mir-297a-5p	MIMAT0000375	Azin1	54375	Sequencing	19536157	Unspecified
mmu-mir-29b-3p	MIMAT0000127	Bace1	23821	Luciferase assay//qRT-PCR//Western blot	22664922	Unspecified
mmu-let-7b-5p	MIMAT0000522	Bach1	12013	Sequencing	tarbase	Unspecified
mmu-let-7b-5p	MIMAT0000522	Bach1	12013	Sequencing	19536157	Unspecified
mmu-mir-29b-3p	MIMAT0000127	Eps15	13858	HITS-CLIP	21258322	Unspecified
mmu-mir-29b-3p	MIMAT0000127	Bak1	12018	Luciferase assay//Microarray//qRT-PCR//Western blot	21245165	Unspecified
mmu-let-7b-5p	MIMAT0000522	Kpna1	16646	Sequencing	tarbase	Unspecified
mmu-let-7b-5p	MIMAT0000522	Kpna1	16646	Sequencing	19536157	Unspecified
mmu-mir-29b-3p	MIMAT0000127	Bcl2l11	12125	Luciferase assay//Microarray//qRT-PCR//Western blot	21245165	Unspecified
mmu-mir-29b-3p	MIMAT0000127	Bmf	171543	Luciferase assay//Microarray//qRT-PCR//Western blot	21245165	Unspecified
mmu-let-7b-5p	MIMAT0000522	Bsg	12215	Sequencing	19536157	Unspecified
mmu-let-7b-5p	MIMAT0000522	Bsg	12215	Sequencing	tarbase	Unspecified
mmu-let-7b-5p	MIMAT0000522	Bsg	12215	Luciferase assay//Western blot	21087605	Unspecified
mmu-let-7b-5p	MIMAT0000522	Lpgat1	226856	Sequencing	tarbase	Unspecified
mmu-let-7b-5p	MIMAT0000522	Cadm2	239857	Sequencing	19536157	Unspecified
mmu-let-7b-5p	MIMAT0000522	Cadm2	239857	Sequencing	tarbase	Unspecified
mmu-let-7b-5p	MIMAT0000522	Cald1	109624	Sequencing	19536157	Unspecified
mmu-let-7b-5p	MIMAT0000522	Cald1	109624	Sequencing	tarbase	Unspecified
mmu-let-7b-5p	MIMAT0000522	Car2	12349	Sequencing	tarbase	Unspecified
mmu-let-7b-5p	MIMAT0000522	Car2	12349	Sequencing	19536157	Unspecified
mmu-let-7b-5p	MIMAT0000522	Cat	12359	Sequencing	tarbase	Unspecified
mmu-let-7b-5p	MIMAT0000522	Cat	12359	Sequencing	19536157	Unspecified
mmu-mir-29b-3p	MIMAT0000127	Cav2	12390	reporter_gene	tarbase	Unspecified
mmu-mir-29b-3p	MIMAT0000127	Cav2	12390	Reporter assay	17652184	Unspecified
mmu-let-7b-5p	MIMAT0000522	Cbx5	12419	Sequencing	tarbase	Unspecified
mmu-let-7b-5p	MIMAT0000522	Cbx5	12419	Sequencing	19536157	Unspecified
mmu-let-7b-5p	MIMAT0000522	Fndc3a	319448	Sequencing	19536157	Unspecified
mmu-let-7b-5p	MIMAT0000522	Fndc3a	319448	Sequencing	tarbase	Unspecified
mmu-let-7b-5p	MIMAT0000522	Fnip1	216742	Sequencing	tarbase	Unspecified
mmu-let-7b-5p	MIMAT0000522	Fnip1	216742	Sequencing	19536157	Unspecified
mmu-let-7b-5p	MIMAT0000522	Fnip2	329679	Sequencing	19536157	Unspecified
mmu-let-7b-5p	MIMAT0000522	Fnip2	329679	Sequencing	tarbase	Unspecified
mmu-let-7b-5p	MIMAT0000522	Map4k3	225028	Sequencing	19536157	Unspecified
mmu-let-7b-5p	MIMAT0000522	Map4k3	225028	Sequencing	tarbase	Unspecified
mmu-mir-181b-5p	MIMAT0000673	Ccdc58	381045	Microarray	18762567	Unspecified
mmu-mir-181b-5p	MIMAT0000673	H2-D1	14964	HITS-CLIP	21258322	Unspecified
mmu-mir-181b-5p	MIMAT0000673	H2-D1	14980	HITS-CLIP	21258322	Unspecified
mmu-let-7b-5p	MIMAT0000522	Ccnd1	12443	Sequencing	tarbase	Unspecified
mmu-let-7b-5p	MIMAT0000522	Ccnd1	12443	Sequencing	19536157	Unspecified
mmu-mir-133a-3p	MIMAT0000145	Ccnd2	12444	Luciferase assay//Western blot	20056941	Unspecified
mmu-let-7b-5p	MIMAT0000522	Fras1	231470	Sequencing	tarbase	Unspecified
mmu-let-7b-5p	MIMAT0000522	Fras1	231470	Sequencing	19536157	Unspecified
mmu-let-7b-5p	MIMAT0000522	Ctsb	13030	Sequencing	19536157	Unspecified
mmu-let-7b-5p	MIMAT0000522	Ctsb	13030	Sequencing	tarbase	Unspecified
mmu-let-7b-5p	MIMAT0000522	Cd164	53599	Sequencing	19536157	Unspecified
mmu-let-7b-5p	MIMAT0000522	Cd164	53599	Sequencing	tarbase	Unspecified
mmu-let-7b-5p	MIMAT0000522	Tbc1d24	18209	Sequencing	19536157	Unspecified
mmu-let-7b-5p	MIMAT0000522	Galnt2	108148	Sequencing	tarbase	Unspecified
mmu-let-7b-5p	MIMAT0000522	Cdr2l	237988	Sequencing	19536157	Unspecified
mmu-let-7b-5p	MIMAT0000522	Cdr2l	237988	Sequencing	tarbase	Unspecified
mmu-mir-23b-3p	MIMAT0000125	Celf1	13046	Luciferase assay//qRT-PCR//Western blot	20299448	Unspecified
mmu-mir-23b-3p	MIMAT0000125	Celf2	14007	Luciferase assay//qRT-PCR//Western blot	20299448	Unspecified
mmu-let-7b-5p	MIMAT0000522	Cep120	225523	Sequencing	19536157	Unspecified
mmu-let-7b-5p	MIMAT0000522	Gga3	260302	Sequencing	19536157	Unspecified
mmu-let-7b-5p	MIMAT0000522	Gga3	260302	Sequencing	tarbase	Unspecified
mmu-let-7b-5p	MIMAT0000522	Chd3	216848	Sequencing	tarbase	Unspecified
mmu-let-7b-5p	MIMAT0000522	Chd3	216848	Sequencing	19536157	Unspecified
mmu-let-7b-5p	MIMAT0000522	Chd7	320790	Sequencing	19536157	Unspecified
mmu-let-7b-5p	MIMAT0000522	Chd7	320790	Sequencing	tarbase	Unspecified
mmu-let-7b-5p	MIMAT0000522	Chd9	109151	Sequencing	tarbase	Unspecified
mmu-let-7b-5p	MIMAT0000522	Chd9	109151	Sequencing	19536157	Unspecified
mmu-let-7b-5p	MIMAT0000522	Cldn12	64945	Sequencing	tarbase	Unspecified
mmu-let-7b-5p	MIMAT0000522	Cldn12	64945	Sequencing	19536157	Unspecified
mmu-let-7b-5p	MIMAT0000522	Msi2	76626	Sequencing	19536157	Unspecified
mmu-let-7b-5p	MIMAT0000522	Msi2	76626	HITS-CLIP	25083871	Unspecified
mmu-let-7c-5p	MIMAT0000523	Msi2	76626	HITS-CLIP	25083871	Unspecified
mmu-mir-29b-3p	MIMAT0000127	Col3a1	12825	Luciferase assay//Microarray//Northern blot//qRT-PCR	18723672	Unspecified
mmu-mir-29b-3p	MIMAT0000127	Col4a1	12826	Luciferase assay//qRT-PCR//Western blot	23139829	Unspecified
mmu-let-7b-5p	MIMAT0000522	Col4a2	12827	Sequencing	19536157	Unspecified
mmu-let-7b-5p	MIMAT0000522	Col4a2	12827	Sequencing	tarbase	Unspecified
mmu-mir-29b-3p	MIMAT0000127	Col4a2	12827	Luciferase assay//qRT-PCR//Western blot	23139829	Unspecified
mmu-mir-29b-3p	MIMAT0000127	Col4a2	12827	Luciferase assay//Microarray//Northern blot//qRT-PCR//Western blot	19342382	Unspecified
mmu-let-7b-5p	MIMAT0000522	Gpcpd1	74182	Sequencing	19536157	Unspecified
mmu-mir-29b-3p	MIMAT0000127	Col5a3	53867	Luciferase assay//Microarray//Northern blot//qRT-PCR//Western blot	19342382	Unspecified
mmu-mir-103-3p	MIMAT0000546	Gpd1	14555	Reporter assay	15131085	Unspecified
mmu-let-7c-5p	MIMAT0000523	Mycn	18109	Luciferase assay//Microarray//qRT-PCR//Western blot//Immunohistochemistry	20054295	Unspecified
mmu-let-7b-5p	MIMAT0000522	Cpeb4	67579	Sequencing	tarbase	Unspecified
mmu-let-7b-5p	MIMAT0000522	Cpeb4	67579	Sequencing	19536157	Unspecified
mmu-let-7b-5p	MIMAT0000522	Gramd1b	235283	Sequencing	19536157	Unspecified
mmu-let-7b-5p	MIMAT0000522	Crem	12916	Sequencing	tarbase	Unspecified
mmu-let-7b-5p	MIMAT0000522	Crem	12916	Sequencing	19536157	Unspecified
mmu-let-7b-5p	MIMAT0000522	Crk	12928	Sequencing	tarbase	Unspecified
mmu-let-7b-5p	MIMAT0000522	Crk	12928	Sequencing	19536157	Unspecified
mmu-let-7b-5p	MIMAT0000522	Csrnp2	207785	Sequencing	tarbase	Unspecified
mmu-let-7b-5p	MIMAT0000522	Csrnp2	207785	Sequencing	19536157	Unspecified
mmu-let-7b-5p	MIMAT0000522	Gxylt1	223827	Sequencing	19536157	Unspecified
mmu-mir-29b-3p	MIMAT0000127	Ctnnbip1	67087	Luciferase assay//Microarray//Northern blot//qRT-PCR//Western blot	19342382	Unspecified
mmu-mir-29b-3p	MIMAT0000127	Hdac4	208727	Luciferase assay//Microarray//Northern blot//qRT-PCR//Western blot	19342382	Unspecified
mmu-let-7b-5p	MIMAT0000522	Pdgfrb	18596	Sequencing	tarbase	Unspecified
mmu-let-7b-5p	MIMAT0000522	Hic2	58180	Sequencing	19536157	Unspecified
mmu-let-7b-5p	MIMAT0000522	Hic2	58180	Sequencing	tarbase	Unspecified
mmu-let-7b-5p	MIMAT0000522	Nfxl1	100978	Sequencing	19536157	Unspecified
mmu-let-7b-5p	MIMAT0000522	Nfxl1	100978	Sequencing	tarbase	Unspecified
mmu-let-7b-5p	MIMAT0000522	D630045J12Rik	330286	Sequencing	tarbase	Unspecified
mmu-let-7b-5p	MIMAT0000522	Ercc6	319955	Sequencing	19536157	Unspecified
mmu-let-7b-5p	MIMAT0000522	Ercc6	319955	Sequencing	tarbase	Unspecified
mmu-let-7b-5p	MIMAT0000522	Mex3a	72640	Sequencing	tarbase	Unspecified
mmu-let-7b-5p	MIMAT0000522	Sema4f	20355	Sequencing	19536157	Unspecified
mmu-let-7b-5p	MIMAT0000522	Sema4f	20355	Sequencing	tarbase	Unspecified
mmu-let-7b-5p	MIMAT0000522	Nova1	664883	Sequencing	19536157	Unspecified
mmu-let-7b-5p	MIMAT0000522	Ddx10	77591	Sequencing	19536157	Unspecified
mmu-let-7b-5p	MIMAT0000522	Ddx10	77591	Sequencing	tarbase	Unspecified
mmu-let-7b-5p	MIMAT0000522	Dip2b	239667	Sequencing	19536157	Unspecified
mmu-let-7b-5p	MIMAT0000522	Dip2b	239667	Sequencing	tarbase	Unspecified
mmu-let-7b-5p	MIMAT0000522	Ikbkg	16151	Sequencing	tarbase	Unspecified
mmu-let-7b-5p	MIMAT0000522	Ikbkg	16151	Sequencing	19536157	Unspecified
mmu-let-7b-5p	MIMAT0000522	Dmd	13405	Sequencing	tarbase	Unspecified
mmu-let-7b-5p	MIMAT0000522	Dmd	13405	Sequencing	19536157	Unspecified
mmu-let-7b-5p	MIMAT0000522	Usp47	74996	Sequencing	19536157	Unspecified
mmu-let-7b-5p	MIMAT0000522	Usp47	74996	Sequencing	tarbase	Unspecified
mmu-let-7b-5p	MIMAT0000522	Usp49	224836	Sequencing	tarbase	Unspecified
mmu-let-7b-5p	MIMAT0000522	Lpgat1	226856	Sequencing	19536157	Unspecified
mmu-let-7b-5p	MIMAT0000522	Donson	60364	Sequencing	19536157	Unspecified
mmu-mir-29b-3p	MIMAT0000127	Insig1	231070	reporter_gene	tarbase	Unspecified
mmu-mir-29b-3p	MIMAT0000127	Insig1	231070	Reporter assay	17652184	Unspecified
mmu-mir-29b-3p	MIMAT0000127	Dusp2	13537	Luciferase assay//Microarray//Northern blot//qRT-PCR//Western blot	19342382	Unspecified
[truncated: 11,390 more rows]
