# Supplementary material for: Transcriptomic profile of the mice aging lung is associated with inflammation and apoptosis as important pathways
Source: Aging (Albany NY). 2021 May 12;13(9):12378–94. doi: 10.18632/aging.203039 (PMC8148450; doi:10.18632/aging.203039)
Supplement: Supplementary Table 7 [file aging-13-203039-s008.xlsx]

## Sheet: mirnet_KEGG_enrichment
Supplementary Table 7. Critical pathways involved in lung aging.
Pathway	Total	Expected	Hits	Pval	stringsAsFactor
Pathways in cancer	397	135	212	3.1e-16	FALSE
Proteoglycans in cancer	205	69.7	125	1.24e-15	FALSE
Focal adhesion	208	70.7	125	6.04e-15	FALSE
FoxO signaling pathway	134	45.6	86	6.48e-13	FALSE
Axon guidance	129	43.9	83	1.35e-12	FALSE
Protein processing in endoplasmic reticulum	168	57.1	99	2.18e-11	FALSE
Adherens junction	74	25.2	52	1.77e-10	FALSE
AMPK signaling pathway	129	43.9	78	5.45e-10	FALSE
Renal cell carcinoma	68	23.1	48	7e-10	FALSE
MAPK signaling pathway	253	86	132	1.21e-09	FALSE
Prostate cancer	89	30.3	58	1.61e-09	FALSE
Endocytosis	278	94.5	142	1.86e-09	FALSE
Regulation of actin cytoskeleton	217	73.8	116	1.94e-09	FALSE
PI3K-Akt signaling pathway	351	119	172	2.21e-09	FALSE
Colorectal cancer	64	21.8	45	2.94e-09	FALSE
Pancreatic cancer	66	22.4	46	3.09e-09	FALSE
Rap1 signaling pathway	214	72.8	113	7.98e-09	FALSE
Insulin resistance	111	37.8	67	9.99e-09	FALSE
HTLV-I infection	281	95.6	140	1.94e-08	FALSE
ErbB signaling pathway	87	29.6	55	2.13e-08	FALSE
TNF signaling pathway	110	37.4	64	1.51e-07	FALSE
Bacterial invasion of epithelial cells	78	26.5	49	1.68e-07	FALSE
Sphingolipid signaling pathway	124	42.2	70	2.06e-07	FALSE
Cell cycle	125	42.5	70	3.14e-07	FALSE
Chronic myeloid leukemia	73	24.8	46	3.51e-07	FALSE
Hepatitis B	146	49.7	79	3.87e-07	FALSE
p53 signaling pathway	67	22.8	43	4.01e-07	FALSE
Ubiquitin mediated proteolysis	143	48.6	77	7.04e-07	FALSE
HIF-1 signaling pathway	109	37.1	62	7.1e-07	FALSE
Small cell lung cancer	85	28.9	51	7.51e-07	FALSE
Chagas disease (American trypanosomiasis)	103	35	59	9.54e-07	FALSE
Thyroid hormone signaling pathway	117	39.8	65	1.21e-06	FALSE
Hippo signaling pathway	154	52.4	81	1.3e-06	FALSE
Lysosome	124	42.2	68	1.31e-06	FALSE
mTOR signaling pathway	61	20.7	39	1.61e-06	FALSE
TGF-beta signaling pathway	85	28.9	50	2.2e-06	FALSE
T cell receptor signaling pathway	105	35.7	59	2.27e-06	FALSE
Metabolic pathways	1290	437	509	2.78e-06	FALSE
Neurotrophin signaling pathway	122	41.5	66	3.51e-06	FALSE
Transcriptional misregulation in cancer	177	60.2	89	4.73e-06	FALSE
Progesterone-mediated oocyte maturation	88	29.9	50	8.72e-06	FALSE
Insulin signaling pathway	141	48	73	9.02e-06	FALSE
Lysine degradation	52	17.7	33	1.29e-05	FALSE
Endometrial cancer	52	17.7	33	1.29e-05	FALSE
Osteoclast differentiation	126	42.9	66	1.46e-05	FALSE
Glioma	65	22.1	39	1.5e-05	FALSE
Acute myeloid leukemia	57	19.4	35	2.02e-05	FALSE
Phosphatidylinositol signaling system	97	33	53	2.18e-05	FALSE
Circadian rhythm	31	10.5	22	2.84e-05	FALSE
Toxoplasmosis	113	38.4	59	4.64e-05	FALSE
Oocyte meiosis	114	38.8	59	6.47e-05	FALSE
Estrogen signaling pathway	98	33.3	52	7.42e-05	FALSE
Ras signaling pathway	230	78.2	106	7.9e-05	FALSE
Oxytocin signaling pathway	158	53.7	77	8.03e-05	FALSE
Choline metabolism in cancer	101	34.4	53	9.36e-05	FALSE
Wnt signaling pathway	144	49	71	9.48e-05	FALSE
Non-small cell lung cancer	56	19	33	0.000111	FALSE
Signaling pathways regulating pluripotency of stem cells	140	47.6	69	0.00012	FALSE
cGMP-PKG signaling pathway	172	58.5	82	0.000125	FALSE
Sphingolipid metabolism	48	16.3	29	0.000156	FALSE
ABC transporters	46	15.6	28	0.000169	FALSE
Phospholipase D signaling pathway	144	49	70	0.000184	FALSE
N-Glycan biosynthesis	49	16.7	29	0.000259	FALSE
Platelet activation	131	44.6	64	0.000286	FALSE
GnRH signaling pathway	88	29.9	46	0.000299	FALSE
Apoptosis	81	27.5	43	0.0003	FALSE
Adipocytokine signaling pathway	72	24.5	39	0.000329	FALSE
Bladder cancer	41	13.9	25	0.000361	FALSE
RNA transport	170	57.8	79	0.000452	FALSE
Central carbon metabolism in cancer	66	22.4	36	0.000462	FALSE
cAMP signaling pathway	198	67.3	90	0.000475	FALSE
Dorso-ventral axis formation	25	8.5	17	0.000532	FALSE
Glucagon signaling pathway	102	34.7	51	0.000581	FALSE
Glycosaminoglycan biosynthesis - heparan sulfate / heparin	24	8.16	16	0.00108	FALSE
Melanoma	71	24.1	37	0.00122	FALSE
ECM-receptor interaction	88	29.9	44	0.00135	FALSE
Fatty acid metabolism	51	17.3	28	0.00169	FALSE
Leukocyte transendothelial migration	121	41.2	57	0.00181	FALSE
Inositol phosphate metabolism	70	23.8	36	0.00191	FALSE
Long-term potentiation	66	22.4	34	0.00244	FALSE
Salmonella infection	78	26.5	39	0.00247	FALSE
Gap junction	86	29.2	42	0.00303	FALSE
Prolactin signaling pathway	74	25.2	37	0.00315	FALSE
Fc gamma R-mediated phagocytosis	88	29.9	42	0.00513	FALSE
Alanine, aspartate and glutamate metabolism	38	12.9	21	0.00564	FALSE
Toll-like receptor signaling pathway	101	34.4	47	0.00584	FALSE
Adrenergic signaling in cardiomyocytes	152	51.7	67	0.00586	FALSE
Biosynthesis of unsaturated fatty acids	27	9.18	16	0.00621	FALSE
Pertussis	74	25.2	36	0.00629	FALSE
Glycosylphosphatidylinositol(GPI)-anchor biosynthesis	25	8.5	15	0.00684	FALSE
Jak-STAT signaling pathway	161	54.8	70	0.00729	FALSE
VEGF signaling pathway	60	20.4	30	0.00745	FALSE
Amoebiasis	118	40.1	53	0.00859	FALSE
Nitrogen metabolism	17	5.78	11	0.00941	FALSE
Influenza A	171	58.2	73	0.0104	FALSE
Tight junction	140	47.6	61	0.0111	FALSE
Dopaminergic synapse	135	45.9	59	0.0115	FALSE
Carbon metabolism	117	39.8	52	0.0117	FALSE
Biosynthesis of amino acids	79	26.9	37	0.012	FALSE
Amyotrophic lateral sclerosis (ALS)	52	17.7	26	0.0123	FALSE
