# Supplementary material for: Transcriptomic profile of the mice aging lung is associated with inflammation and apoptosis as important pathways
Source: Aging (Albany NY). 2021 May 12;13(9):12378–94. doi: 10.18632/aging.203039 (PMC8148450; doi:10.18632/aging.203039)
Supplement: Supplementary Table 8 [file aging-13-203039-s009.xlsx]

## Sheet: Congruence
Supplementary Table 8. miRNA target interactions.
PROBEID	SYMBOL	GENENAME	logFC	AveExpr	t	P.Value	adj.P.Val	B	target	miRNA	logFC.miRNA	adjPval.miRNA	miRNA_level	target_level	congruence
17476872	1600014C10Rik	RIKEN cDNA 1600014C10 gene	0.529831	7.19465	3.79004	0.000899674	0.028463	-0.748055	1600014C10Rik	mmu-let-7b-5p	-0.818467	0.041336	DOWN	UP	YES
17476872	1600014C10Rik	RIKEN cDNA 1600014C10 gene	0.529831	7.19465	3.79004	0.000899674	0.028463	-0.748055	1600014C10Rik	mmu-let-7c-5p	-1.47774	0.00234926	DOWN	UP	YES
17476872	1600014C10Rik	RIKEN cDNA 1600014C10 gene	0.529831	7.19465	3.79004	0.000899674	0.028463	-0.748055	1600014C10Rik	mmu-miR-29b-3p	-0.802632	0.0418224	DOWN	UP	YES
17425301	Abca1	ATP-binding cassette, sub-family A (ABC1), member 1	0.575395	8.89853	3.62006	0.00137508	0.0373293	-1.14757	Abca1	mmu-let-7b-5p	-0.818467	0.041336	DOWN	UP	YES
17425301	Abca1	ATP-binding cassette, sub-family A (ABC1), member 1	0.575395	8.89853	3.62006	0.00137508	0.0373293	-1.14757	Abca1	mmu-let-7c-5p	-1.47774	0.00234926	DOWN	UP	YES
17425301	Abca1	ATP-binding cassette, sub-family A (ABC1), member 1	0.575395	8.89853	3.62006	0.00137508	0.0373293	-1.14757	Abca1	mmu-miR-103-3p	-0.833679	0.0367714	DOWN	UP	YES
17425301	Abca1	ATP-binding cassette, sub-family A (ABC1), member 1	0.575395	8.89853	3.62006	0.00137508	0.0373293	-1.14757	Abca1	mmu-miR-23b-3p	-1.06605	0.0198663	DOWN	UP	YES
17271443	Abca6	ATP-binding cassette, sub-family A (ABC1), member 6	-0.674915	6.38918	-3.35035	0.00267476	0.0557407	-1.77099	Abca6	mmu-miR-692	0.6296	0.0221784	UP	DOWN	YES
17320652	Abcd2	ATP-binding cassette, sub-family D (ALD), member 2	0.818558	8.17558	2.54555	0.0177876	0.173942	-3.51275	Abcd2	mmu-miR-181b-5p	-1.18269	0.0379446	DOWN	UP	YES
17335770	Abcg1	ATP binding cassette subfamily G member 1	0.595312	8.4856	3.61934	0.00137756	0.0373418	-1.14926	Abcg1	mmu-let-7b-5p	-0.818467	0.041336	DOWN	UP	YES
17335770	Abcg1	ATP binding cassette subfamily G member 1	0.595312	8.4856	3.61934	0.00137756	0.0373418	-1.14926	Abcg1	mmu-let-7c-5p	-1.47774	0.00234926	DOWN	UP	YES
17392730	Abhd12	abhydrolase domain containing 12	0.714008	8.25928	4.07966	0.000434025	0.0173178	-0.0588031	Abhd12	mmu-let-7b-5p	-0.818467	0.041336	DOWN	UP	YES
17392730	Abhd12	abhydrolase domain containing 12	0.714008	8.25928	4.07966	0.000434025	0.0173178	-0.0588031	Abhd12	mmu-let-7c-5p	-1.47774	0.00234926	DOWN	UP	YES
17493556	Acer3	alkaline ceramidase 3	0.528962	7.14681	1.76749	0.0899209	0.4135	-4.92387	Acer3	mmu-let-7b-5p	-0.818467	0.041336	DOWN	UP	YES
17493556	Acer3	alkaline ceramidase 3	0.528962	7.14681	1.76749	0.0899209	0.4135	-4.92387	Acer3	mmu-let-7c-5p	-1.47774	0.00234926	DOWN	UP	YES
17229984	Ackr1	atypical chemokine receptor 1 (Duffy blood group)	0.701282	5.35944	3.79483	0.000888946	0.0282285	-0.736738	Ackr1	mmu-miR-181b-5p	-1.18269	0.0379446	DOWN	UP	YES
17373222	Acp2	acid phosphatase 2, lysosomal	0.960922	8.61733	3.78411	0.000913143	0.0286664	-0.762071	Acp2	mmu-miR-30d-5p	-0.962649	0.00493363	DOWN	UP	YES
17500996	Acsl1	acyl-CoA synthetase long-chain family member 1	-0.604457	8.98797	-4.00583	0.000522952	0.0196292	-0.235333	Acsl1	mmu-miR-133a-3p	0.967884	0.0235242	UP	DOWN	YES
17545051	Acsl4	acyl-CoA synthetase long-chain family member 4	0.520516	9.49247	2.20277	0.0375051	0.260701	-4.17591	Acsl4	mmu-miR-29b-3p	-0.802632	0.0418224	DOWN	UP	YES
17226420	Actr3	ARP3 actin-related protein 3	0.715477	10.427	4.57889	0.000122416	0.00755418	1.14372	Actr3	mmu-miR-23b-3p	-1.06605	0.0198663	DOWN	UP	YES
17519088	Adam10	a disintegrin and metallopeptidase domain 10	0.535166	9.70938	2.86396	0.00857743	0.113847	-2.84983	Adam10	mmu-let-7b-5p	-0.818467	0.041336	DOWN	UP	YES
17519088	Adam10	a disintegrin and metallopeptidase domain 10	0.535166	9.70938	2.86396	0.00857743	0.113847	-2.84983	Adam10	mmu-let-7c-5p	-1.47774	0.00234926	DOWN	UP	YES
17519088	Adam10	a disintegrin and metallopeptidase domain 10	0.535166	9.70938	2.86396	0.00857743	0.113847	-2.84983	Adam10	mmu-miR-23b-3p	-1.06605	0.0198663	DOWN	UP	YES
17519088	Adam10	a disintegrin and metallopeptidase domain 10	0.535166	9.70938	2.86396	0.00857743	0.113847	-2.84983	Adam10	mmu-miR-297a-5p	-1.26548	0.0305066	DOWN	UP	YES
17519088	Adam10	a disintegrin and metallopeptidase domain 10	0.535166	9.70938	2.86396	0.00857743	0.113847	-2.84983	Adam10	mmu-miR-30d-5p	-0.962649	0.00493363	DOWN	UP	YES
17282343	Adam4	a disintegrin and metallopeptidase domain 4	-0.890291	5.2292	-2.46659	0.0212055	0.19065	-3.67057	Adam4	mmu-miR-133a-3p	0.967884	0.0235242	UP	DOWN	YES
17497525	Adam8	a disintegrin and metallopeptidase domain 8	0.966785	7.59609	6.34097	1.51473e-06	0.00036839	5.32869	Adam8	mmu-let-7b-5p	-0.818467	0.041336	DOWN	UP	YES
17508300	Adam9	a disintegrin and metallopeptidase domain 9 (meltrin gamma)	0.536899	9.62559	2.75961	0.0109305	0.131296	-3.07145	Adam9	mmu-let-7c-5p	-1.47774	0.00234926	DOWN	UP	YES
17508300	Adam9	a disintegrin and metallopeptidase domain 9 (meltrin gamma)	0.536899	9.62559	2.75961	0.0109305	0.131296	-3.07145	Adam9	mmu-miR-30d-5p	-0.962649	0.00493363	DOWN	UP	YES
17479041	Adamts17	a disintegrin-like and metallopeptidase (reprolysin type) with thrombospondin type 1 motif, 17	-0.906094	7.39999	-3.04511	0.00559235	0.0880152	-2.45616	Adamts17	mmu-miR-692	0.6296	0.0221784	UP	DOWN	YES
17249206	Adamts2	a disintegrin-like and metallopeptidase (reprolysin type) with thrombospondin type 1 motif, 2	0.533608	8.13698	2.48057	0.0205592	0.18752	-3.64284	Adamts2	mmu-miR-29b-3p	-0.802632	0.0418224	DOWN	UP	YES
17438530	Adgrl3	adhesion G protein-coupled receptor L3	-0.552411	7.64741	-3.19711	0.00388255	0.0704267	-2.11806	Adgrl3	mmu-miR-133a-3p	0.967884	0.0235242	UP	DOWN	YES
17360599	Adrb1	adrenergic receptor, beta 1	-0.796899	8.34955	-6.19766	2.14367e-06	0.000473957	4.99864	Adrb1	mmu-miR-133a-3p	0.967884	0.0235242	UP	DOWN	YES
17480327	Alg8	asparagine-linked glycosylation 8 (alpha-1,3-glucosyltransferase)	0.55469	8.05912	4.0337	0.000487444	0.0188369	-0.16876	Alg8	mmu-miR-23b-3p	-1.06605	0.0198663	DOWN	UP	YES
17343628	Angptl4	angiopoietin-like 4	0.675426	8.31011	2.33916	0.0280253	0.222245	-3.91906	Angptl4	mmu-miR-29b-3p	-0.802632	0.0418224	DOWN	UP	YES
17509139	Ankrd37	ankyrin repeat domain 37	1.3537	6.88829	6.61451	7.85714e-07	0.000244251	5.9516	Ankrd37	mmu-let-7b-5p	-0.818467	0.041336	DOWN	UP	YES
17509139	Ankrd37	ankyrin repeat domain 37	1.3537	6.88829	6.61451	7.85714e-07	0.000244251	5.9516	Ankrd37	mmu-let-7c-5p	-1.47774	0.00234926	DOWN	UP	YES
17223169	Ankrd44	ankyrin repeat domain 44	-0.509177	9.22826	-2.68078	0.0130995	0.145748	-3.23615	Ankrd44	mmu-miR-133a-3p	0.967884	0.0235242	UP	DOWN	YES
17492431	Anpep	alanyl (membrane) aminopeptidase	0.509456	9.51952	1.55922	0.132097	0.494168	-5.23768	Anpep	mmu-let-7c-5p	-1.47774	0.00234926	DOWN	UP	YES
17363407	Anxa1	annexin A1	1.22727	10.3574	4.11968	0.000392263	0.0161858	0.0370877	Anxa1	mmu-let-7c-5p	-1.47774	0.00234926	DOWN	UP	YES
17518962	Anxa2	annexin A2	0.603616	9.69385	3.7218	0.00106715	0.0315828	-0.908982	Anxa2	mmu-let-7c-5p	-1.47774	0.00234926	DOWN	UP	YES
17439464	Anxa3	annexin A3	0.604259	10.6159	3.04317	0.00561823	0.0883287	-2.46043	Anxa3	mmu-let-7c-5p	-1.47774	0.00234926	DOWN	UP	YES
17453809	Ap1s1	adaptor protein complex AP-1, sigma 1	0.684133	7.57846	3.60324	0.00143378	0.0380484	-1.18686	Ap1s1	mmu-let-7b-5p	-0.818467	0.041336	DOWN	UP	YES
17539467	Ap1s2	adaptor-related protein complex 1, sigma 2 subunit	0.507082	7.2679	2.08706	0.0477289	0.296343	-4.38589	Ap1s2	mmu-let-7c-5p	-1.47774	0.00234926	DOWN	UP	YES
17474136	Ap2s1	adaptor-related protein complex 2, sigma 1 subunit	0.575389	8.3685	3.79897	0.000879771	0.0280016	-0.726951	Ap2s1	mmu-miR-103-3p	-0.833679	0.0367714	DOWN	UP	YES
17474136	Ap2s1	adaptor-related protein complex 2, sigma 1 subunit	0.575389	8.3685	3.79897	0.000879771	0.0280016	-0.726951	Ap2s1	mmu-miR-23b-3p	-1.06605	0.0198663	DOWN	UP	YES
17474136	Ap2s1	adaptor-related protein complex 2, sigma 1 subunit	0.575389	8.3685	3.79897	0.000879771	0.0280016	-0.726951	Ap2s1	mmu-miR-29b-3p	-0.802632	0.0418224	DOWN	UP	YES
17239845	Arg1	arginase, liver	2.77359	7.18005	7.58247	8.29367e-08	6.39521e-05	8.07347	Arg1	mmu-miR-23b-3p	-1.06605	0.0198663	DOWN	UP	YES
17389481	Arhgap11a	Rho GTPase activating protein 11A	0.933834	6.2808	4.48742	0.000154415	0.00875377	0.922701	Arhgap11a	mmu-miR-29b-3p	-0.802632	0.0418224	DOWN	UP	YES
17364707	Arhgap19	Rho GTPase activating protein 19	0.788312	5.40444	4.83738	6.35384e-05	0.00490111	1.76851	Arhgap19	mmu-let-7b-5p	-0.818467	0.041336	DOWN	UP	YES
17515786	Arhgap32	Rho GTPase activating protein 32	-0.640092	7.78964	-3.58393	0.0015042	0.0391086	-1.2319	Arhgap32	mmu-miR-3076-5p	0.501068	0.0261171	UP	DOWN	YES
17523921	Arhgap42	Rho GTPase activating protein 42	-0.514071	8.73404	-2.42163	0.0234141	0.201931	-3.75914	Arhgap42	mmu-miR-692	0.6296	0.0221784	UP	DOWN	YES
17526038	Arhgef12	Rho guanine nucleotide exchange factor (GEF) 12	-0.531363	10.2579	-3.26863	0.00326457	0.0635769	-1.9568	Arhgef12	mmu-miR-692	0.6296	0.0221784	UP	DOWN	YES
17461124	Arl6ip5	ADP-ribosylation factor-like 6 interacting protein 5	0.658835	8.66563	3.76032	0.000969176	0.0298144	-0.81823	Arl6ip5	mmu-miR-30d-5p	-0.962649	0.00493363	DOWN	UP	YES
17442096	Arpc3	actin related protein 2/3 complex, subunit 3	0.503504	9.0379	3.93003	0.000633015	0.0224137	-0.416042	Arpc3	mmu-miR-29b-3p	-0.802632	0.0418224	DOWN	UP	YES
17461638	Arpc4	actin related protein 2/3 complex, subunit 4	0.658818	9.06885	3.41262	0.00229619	0.0507136	-1.62839	Arpc4	mmu-miR-5101	-0.666545	0.00398603	DOWN	UP	YES
17218254	Arpc5	actin related protein 2/3 complex, subunit 5	0.583254	9.70205	3.17892	0.0040569	0.0720811	-2.15886	Arpc5	mmu-miR-23b-3p	-1.06605	0.0198663	DOWN	UP	YES
17218254	Arpc5	actin related protein 2/3 complex, subunit 5	0.583254	9.70205	3.17892	0.0040569	0.0720811	-2.15886	Arpc5	mmu-miR-29b-3p	-0.802632	0.0418224	DOWN	UP	YES
17218254	Arpc5	actin related protein 2/3 complex, subunit 5	0.583254	9.70205	3.17892	0.0040569	0.0720811	-2.15886	Arpc5	mmu-miR-29c-3p	-0.802632	0.0418224	DOWN	UP	YES
17508949	Asah1	N-acylsphingosine amidohydrolase 1	0.521673	9.38308	1.95678	0.0621604	0.341811	-4.61296	Asah1	mmu-miR-30d-5p	-0.962649	0.00493363	DOWN	UP	YES
17317233	Atad2	ATPase family, AAA domain containing 2	0.732569	7.32764	4.15132	0.000362086	0.0153701	0.112997	Atad2	mmu-miR-181b-5p	-1.18269	0.0379446	DOWN	UP	YES
17317233	Atad2	ATPase family, AAA domain containing 2	0.732569	7.32764	4.15132	0.000362086	0.0153701	0.112997	Atad2	mmu-miR-29b-3p	-0.802632	0.0418224	DOWN	UP	YES
17317233	Atad2	ATPase family, AAA domain containing 2	0.732569	7.32764	4.15132	0.000362086	0.0153701	0.112997	Atad2	mmu-miR-29c-3p	-0.802632	0.0418224	DOWN	UP	YES
17317233	Atad2	ATPase family, AAA domain containing 2	0.732569	7.32764	4.15132	0.000362086	0.0153701	0.112997	Atad2	mmu-miR-30d-5p	-0.962649	0.00493363	DOWN	UP	YES
17231033	Atf3	activating transcription factor 3	0.917617	7.92147	7.02154	3.00834e-07	0.00013088	6.86008	Atf3	mmu-let-7b-5p	-0.818467	0.041336	DOWN	UP	YES
17408863	Atp5pb	ATP synthase peripheral stalk-membrane subunit b	0.68684	8.76433	3.14475	0.00440511	0.0756769	-2.23527	Atp5pb	mmu-miR-23b-3p	-1.06605	0.0198663	DOWN	UP	YES
17512456	Atp6v0d1	ATPase, H+ transporting, lysosomal V0 subunit D1	0.602881	9.49687	3.20788	0.00378272	0.0693247	-2.09385	Atp6v0d1	mmu-let-7b-5p	-0.818467	0.041336	DOWN	UP	YES
17512456	Atp6v0d1	ATPase, H+ transporting, lysosomal V0 subunit D1	0.602881	9.49687	3.20788	0.00378272	0.0693247	-2.09385	Atp6v0d1	mmu-let-7c-5p	-1.47774	0.00234926	DOWN	UP	YES
17512456	Atp6v0d1	ATPase, H+ transporting, lysosomal V0 subunit D1	0.602881	9.49687	3.20788	0.00378272	0.0693247	-2.09385	Atp6v0d1	mmu-miR-30d-5p	-0.962649	0.00493363	DOWN	UP	YES
17423577	Atp6v0d2	ATPase, H+ transporting, lysosomal V0 subunit D2	1.74384	8.75429	4.76276	7.67705e-05	0.00552036	1.5882	Atp6v0d2	mmu-let-7b-5p	-0.818467	0.041336	DOWN	UP	YES
17330523	Atp6v1a	ATPase, H+ transporting, lysosomal V1 subunit A	0.725664	8.83878	4.60302	0.000115143	0.007197	1.20205	Atp6v1a	mmu-miR-181b-5p	-1.18269	0.0379446	DOWN	UP	YES
17501652	Atp6v1b2	ATPase, H+ transporting, lysosomal V1 subunit B2	0.767617	9.28647	3.21325	0.00373392	0.0687247	-2.08178	Atp6v1b2	mmu-let-7b-5p	-0.818467	0.041336	DOWN	UP	YES
17501652	Atp6v1b2	ATPase, H+ transporting, lysosomal V1 subunit B2	0.767617	9.28647	3.21325	0.00373392	0.0687247	-2.08178	Atp6v1b2	mmu-let-7c-5p	-1.47774	0.00234926	DOWN	UP	YES
17311157	Atp6v1c1	ATPase, H+ transporting, lysosomal V1 subunit C1	0.698605	8.21948	3.47356	0.00197637	0.0462251	-1.48799	Atp6v1c1	mmu-miR-29b-3p	-0.802632	0.0418224	DOWN	UP	YES
17311157	Atp6v1c1	ATPase, H+ transporting, lysosomal V1 subunit C1	0.698605	8.21948	3.47356	0.00197637	0.0462251	-1.48799	Atp6v1c1	mmu-miR-30d-5p	-0.962649	0.00493363	DOWN	UP	YES
17470445	Atp6v1e1	ATPase, H+ transporting, lysosomal V1 subunit E1	0.57828	8.94538	3.46632	0.00201197	0.046741	-1.50472	Atp6v1e1	mmu-let-7b-5p	-0.818467	0.041336	DOWN	UP	YES
17470445	Atp6v1e1	ATPase, H+ transporting, lysosomal V1 subunit E1	0.57828	8.94538	3.46632	0.00201197	0.046741	-1.50472	Atp6v1e1	mmu-let-7c-5p	-1.47774	0.00234926	DOWN	UP	YES
17470445	Atp6v1e1	ATPase, H+ transporting, lysosomal V1 subunit E1	0.57828	8.94538	3.46632	0.00201197	0.046741	-1.50472	Atp6v1e1	mmu-miR-103-3p	-0.833679	0.0367714	DOWN	UP	YES
17355026	Atp8b1	ATPase, class I, type 8B, member 1	0.571089	8.38688	3.98531	0.000550728	0.0203484	-0.284316	Atp8b1	mmu-let-7c-5p	-1.47774	0.00234926	DOWN	UP	YES
17355026	Atp8b1	ATPase, class I, type 8B, member 1	0.571089	8.38688	3.98531	0.000550728	0.0203484	-0.284316	Atp8b1	mmu-miR-30d-5p	-0.962649	0.00493363	DOWN	UP	YES
17391056	Atp8b4	ATPase, class I, type 8B, member 4	0.80983	6.3978	4.61708	0.000111106	0.00707806	1.23603	Atp8b4	mmu-miR-30d-5p	-0.962649	0.00493363	DOWN	UP	YES
17251485	Aurkb	aurora kinase B	0.766717	6.57287	3.4367	0.00216422	0.0488161	-1.57301	Aurkb	mmu-miR-29b-3p	-0.802632	0.0418224	DOWN	UP	YES
17251485	Aurkb	aurora kinase B	0.766717	6.57287	3.4367	0.00216422	0.0488161	-1.57301	Aurkb	mmu-miR-29c-3p	-0.802632	0.0418224	DOWN	UP	YES
17251485	Aurkb	aurora kinase B	0.766717	6.57287	3.4367	0.00216422	0.0488161	-1.57301	Aurkb	mmu-miR-5101	-0.666545	0.00398603	DOWN	UP	YES
17488032	Axl	AXL receptor tyrosine kinase	0.806933	9.4018	4.63222	0.000106915	0.00687468	1.27264	Axl	mmu-miR-181b-5p	-1.18269	0.0379446	DOWN	UP	YES
17488032	Axl	AXL receptor tyrosine kinase	0.806933	9.4018	4.63222	0.000106915	0.00687468	1.27264	Axl	mmu-miR-3064-5p	-0.505052	0.0268297	DOWN	UP	YES
17316700	Azin1	antizyme inhibitor 1	0.515861	8.93506	2.55273	0.0175038	0.172144	-3.49827	Azin1	mmu-miR-181b-5p	-1.18269	0.0379446	DOWN	UP	YES
17316700	Azin1	antizyme inhibitor 1	0.515861	8.93506	2.55273	0.0175038	0.172144	-3.49827	Azin1	mmu-miR-23b-3p	-1.06605	0.0198663	DOWN	UP	YES
17316700	Azin1	antizyme inhibitor 1	0.515861	8.93506	2.55273	0.0175038	0.172144	-3.49827	Azin1	mmu-miR-297a-5p	-1.26548	0.0305066	DOWN	UP	YES
17316700	Azin1	antizyme inhibitor 1	0.515861	8.93506	2.55273	0.0175038	0.172144	-3.49827	Azin1	mmu-miR-30d-5p	-0.962649	0.00493363	DOWN	UP	YES
17215097	B3gnt7	UDP-GlcNAc:betaGal beta-1,3-N-acetylglucosaminyltransferase 7	0.971079	6.59695	4.10526	0.000406826	0.0165553	0.0025308	B3gnt7	mmu-let-7c-5p	-1.47774	0.00234926	DOWN	UP	YES
17394694	B4galt5	UDP-Gal:betaGlcNAc beta 1,4-galactosyltransferase, polypeptide 5	0.92872	8.92718	5.62611	8.74668e-06	0.00130553	3.65965	B4galt5	mmu-miR-30d-5p	-0.962649	0.00493363	DOWN	UP	YES
17352985	B4galt6	UDP-Gal:betaGlcNAc beta 1,4-galactosyltransferase, polypeptide 6	1.38871	6.82441	7.60782	7.83201e-08	6.2272e-05	8.12723	B4galt6	mmu-let-7b-5p	-0.818467	0.041336	DOWN	UP	YES
17352985	B4galt6	UDP-Gal:betaGlcNAc beta 1,4-galactosyltransferase, polypeptide 6	1.38871	6.82441	7.60782	7.83201e-08	6.2272e-05	8.12723	B4galt6	mmu-let-7c-5p	-1.47774	0.00234926	DOWN	UP	YES
17352985	B4galt6	UDP-Gal:betaGlcNAc beta 1,4-galactosyltransferase, polypeptide 6	1.38871	6.82441	7.60782	7.83201e-08	6.2272e-05	8.12723	B4galt6	mmu-miR-181b-5p	-1.18269	0.0379446	DOWN	UP	YES
17352985	B4galt6	UDP-Gal:betaGlcNAc beta 1,4-galactosyltransferase, polypeptide 6	1.38871	6.82441	7.60782	7.83201e-08	6.2272e-05	8.12723	B4galt6	mmu-miR-297a-5p	-1.26548	0.0305066	DOWN	UP	YES
17352985	B4galt6	UDP-Gal:betaGlcNAc beta 1,4-galactosyltransferase, polypeptide 6	1.38871	6.82441	7.60782	7.83201e-08	6.2272e-05	8.12723	B4galt6	mmu-miR-29b-3p	-0.802632	0.0418224	DOWN	UP	YES
17352985	B4galt6	UDP-Gal:betaGlcNAc beta 1,4-galactosyltransferase, polypeptide 6	1.38871	6.82441	7.60782	7.83201e-08	6.2272e-05	8.12723	B4galt6	mmu-miR-30d-5p	-0.962649	0.00493363	DOWN	UP	YES
17316175	Basp1	brain abundant, membrane attached signal protein 1	0.625295	7.98209	5.3044	1.95472e-05	0.00222027	2.89276	Basp1	mmu-miR-29b-3p	-0.802632	0.0418224	DOWN	UP	YES
17316175	Basp1	brain abundant, membrane attached signal protein 1	0.625295	7.98209	5.3044	1.95472e-05	0.00222027	2.89276	Basp1	mmu-miR-29c-3p	-0.802632	0.0418224	DOWN	UP	YES
17280552	Bcap29	B cell receptor associated protein 29	0.624092	7.66933	1.7889	0.0863216	0.404553	-4.88989	Bcap29	mmu-let-7b-5p	-0.818467	0.041336	DOWN	UP	YES
17280552	Bcap29	B cell receptor associated protein 29	0.624092	7.66933	1.7889	0.0863216	0.404553	-4.88989	Bcap29	mmu-let-7c-5p	-1.47774	0.00234926	DOWN	UP	YES
17461414	Bhlhe40	basic helix-loop-helix family, member e40	0.730623	9.3698	4.29131	0.000253981	0.0122673	0.449602	Bhlhe40	mmu-let-7c-5p	-1.47774	0.00234926	DOWN	UP	YES
17461414	Bhlhe40	basic helix-loop-helix family, member e40	0.730623	9.3698	4.29131	0.000253981	0.0122673	0.449602	Bhlhe40	mmu-miR-181b-5p	-1.18269	0.0379446	DOWN	UP	YES
17461414	Bhlhe40	basic helix-loop-helix family, member e40	0.730623	9.3698	4.29131	0.000253981	0.0122673	0.449602	Bhlhe40	mmu-miR-30d-5p	-0.962649	0.00493363	DOWN	UP	YES
17472760	Bhlhe41	basic helix-loop-helix family, member e41	0.640441	6.87994	2.66382	0.0136162	0.148696	-3.27126	Bhlhe41	mmu-let-7b-5p	-0.818467	0.041336	DOWN	UP	YES
17472760	Bhlhe41	basic helix-loop-helix family, member e41	0.640441	6.87994	2.66382	0.0136162	0.148696	-3.27126	Bhlhe41	mmu-let-7c-5p	-1.47774	0.00234926	DOWN	UP	YES
17472760	Bhlhe41	basic helix-loop-helix family, member e41	0.640441	6.87994	2.66382	0.0136162	0.148696	-3.27126	Bhlhe41	mmu-miR-23b-3p	-1.06605	0.0198663	DOWN	UP	YES
17258867	Birc5	baculoviral IAP repeat-containing 5	1.00202	5.04237	4.194	0.000325006	0.0144178	0.215491	Birc5	mmu-let-7b-5p	-0.818467	0.041336	DOWN	UP	YES
17426434	Brinp1	bone morphogenic protein/retinoic acid inducible neural specific 1	0.697752	6.68732	3.43142	0.00219247	0.0493245	-1.58515	Brinp1	mmu-let-7b-5p	-0.818467	0.041336	DOWN	UP	YES
17510345	Bst2	bone marrow stromal cell antigen 2	0.880768	9.1275	4.9375	4.93087e-05	0.00419872	2.01024	Bst2	mmu-miR-29b-3p	-0.802632	0.0418224	DOWN	UP	YES
17391376	Bub1	BUB1, mitotic checkpoint serine/threonine kinase	0.882473	5.47348	3.52652	0.00173407	0.042886	-1.36539	Bub1	mmu-miR-23b-3p	-1.06605	0.0198663	DOWN	UP	YES
17548127	Cacul1	CDK2 associated, cullin domain 1	0.615147	7.5516	3.89927	0.00068395	0.0234477	-0.489201	Cacul1	mmu-miR-29b-3p	-0.802632	0.0418224	DOWN	UP	YES
17457184	Cald1	caldesmon 1	0.518107	8.81201	2.04339	0.0521944	0.311711	-4.46315	Cald1	mmu-let-7b-5p	-0.818467	0.041336	DOWN	UP	YES
17457184	Cald1	caldesmon 1	0.518107	8.81201	2.04339	0.0521944	0.311711	-4.46315	Cald1	mmu-let-7c-5p	-1.47774	0.00234926	DOWN	UP	YES
17457184	Cald1	caldesmon 1	0.518107	8.81201	2.04339	0.0521944	0.311711	-4.46315	Cald1	mmu-miR-181b-5p	-1.18269	0.0379446	DOWN	UP	YES
17345238	Capn11	calpain 11	0.610158	5.2299	2.81251	0.00967012	0.121931	-2.95959	Capn11	mmu-miR-23b-3p	-1.06605	0.0198663	DOWN	UP	YES
17456204	Capza2	capping protein (actin filament) muscle Z-line, alpha 2	0.692222	8.79653	3.30846	0.00296289	0.0598441	-1.86644	Capza2	mmu-miR-103-3p	-0.833679	0.0367714	DOWN	UP	YES
17456204	Capza2	capping protein (actin filament) muscle Z-line, alpha 2	0.692222	8.79653	3.30846	0.00296289	0.0598441	-1.86644	Capza2	mmu-miR-181b-5p	-1.18269	0.0379446	DOWN	UP	YES
17456204	Capza2	capping protein (actin filament) muscle Z-line, alpha 2	0.692222	8.79653	3.30846	0.00296289	0.0598441	-1.86644	Capza2	mmu-miR-29b-3p	-0.802632	0.0418224	DOWN	UP	YES
17396143	Car13	carbonic anhydrase 13	0.941091	7.17155	4.90011	5.4204e-05	0.00446819	1.91999	Car13	mmu-let-7c-5p	-1.47774	0.00234926	DOWN	UP	YES
17292426	Card19	caspase recruitment domain family, member 19	0.515216	8.37786	5.17055	2.73728e-05	0.00280026	2.57157	Card19	mmu-let-7c-5p	-1.47774	0.00234926	DOWN	UP	YES
17292426	Card19	caspase recruitment domain family, member 19	0.515216	8.37786	5.17055	2.73728e-05	0.00280026	2.57157	Card19	mmu-miR-29b-3p	-0.802632	0.0418224	DOWN	UP	YES
17375327	Casc4	cancer susceptibility candidate 4	-0.600529	9.11108	-3.13515	0.00450799	0.0766323	-2.25667	Casc4	mmu-miR-133a-3p	0.967884	0.0235242	UP	DOWN	YES
17501041	Casp3	caspase 3	0.636637	6.15087	4.27705	0.000263331	0.0126036	0.415262	Casp3	mmu-let-7b-5p	-0.818467	0.041336	DOWN	UP	YES
17501041	Casp3	caspase 3	0.636637	6.15087	4.27705	0.000263331	0.0126036	0.415262	Casp3	mmu-let-7c-5p	-1.47774	0.00234926	DOWN	UP	YES
17501041	Casp3	caspase 3	0.636637	6.15087	4.27705	0.000263331	0.0126036	0.415262	Casp3	mmu-miR-181b-5p	-1.18269	0.0379446	DOWN	UP	YES
17501041	Casp3	caspase 3	0.636637	6.15087	4.27705	0.000263331	0.0126036	0.415262	Casp3	mmu-miR-29b-3p	-0.802632	0.0418224	DOWN	UP	YES
17501041	Casp3	caspase 3	0.636637	6.15087	4.27705	0.000263331	0.0126036	0.415262	Casp3	mmu-miR-29c-3p	-0.802632	0.0418224	DOWN	UP	YES
17514435	Casp4	caspase 4, apoptosis-related cysteine peptidase	0.70929	7.77272	3.28944	0.00310346	0.0613531	-1.90965	Casp4	mmu-let-7b-5p	-0.818467	0.041336	DOWN	UP	YES
17302102	Ccdc122	coiled-coil domain containing 122	0.991256	5.98115	3.63197	0.00133494	0.036771	-1.11972	Ccdc122	mmu-let-7b-5p	-0.818467	0.041336	DOWN	UP	YES
17301440	Ccdc25	coiled-coil domain containing 25	0.663086	6.70038	3.30558	0.00298373	0.0600303	-1.87298	Ccdc25	mmu-miR-29b-3p	-0.802632	0.0418224	DOWN	UP	YES
17301440	Ccdc25	coiled-coil domain containing 25	0.663086	6.70038	3.30558	0.00298373	0.0600303	-1.87298	Ccdc25	mmu-miR-674-5p	-0.546437	0.0466459	DOWN	UP	YES
17325904	Ccdc80	coiled-coil domain containing 80	0.800743	7.03479	3.26598	0.00328566	0.0638373	-1.96279	Ccdc80	mmu-miR-29b-3p	-0.802632	0.0418224	DOWN	UP	YES
17254041	Ccl2	chemokine (C-C motif) ligand 2	2.35101	6.53653	9.51105	1.35665e-09	5.87572e-06	11.8848	Ccl2	mmu-let-7b-5p	-0.818467	0.041336	DOWN	UP	YES
17254041	Ccl2	chemokine (C-C motif) ligand 2	2.35101	6.53653	9.51105	1.35665e-09	5.87572e-06	11.8848	Ccl2	mmu-let-7c-5p	-1.47774	0.00234926	DOWN	UP	YES
17266967	Ccl3	chemokine (C-C motif) ligand 3	2.13445	6.63588	5.48184	1.25327e-05	0.00162902	3.31671	Ccl3	mmu-miR-30d-5p	-0.962649	0.00493363	DOWN	UP	YES
17266952	Ccl9	chemokine (C-C motif) ligand 9	2.52481	9.36491	7.30663	1.5549e-07	9.18389e-05	7.48253	Ccl9	mmu-miR-1192	-0.92619	0.007197	DOWN	UP	YES
17232235	Ccn2	cellular communication network factor 2	0.733102	8.94942	3.22457	0.00363294	0.0675985	-2.05629	Ccn2	mmu-let-7b-5p	-0.818467	0.041336	DOWN	UP	YES
17232235	Ccn2	cellular communication network factor 2	0.733102	8.94942	3.22457	0.00363294	0.0675985	-2.05629	Ccn2	mmu-let-7c-5p	-1.47774	0.00234926	DOWN	UP	YES
17232235	Ccn2	cellular communication network factor 2	0.733102	8.94942	3.22457	0.00363294	0.0675985	-2.05629	Ccn2	mmu-miR-297a-5p	-1.26548	0.0305066	DOWN	UP	YES
17312022	Ccn4	cellular communication network factor 4	1.02776	5.99735	4.3514	0.000218077	0.0111176	0.594417	Ccn4	mmu-miR-23b-3p	-1.06605	0.0198663	DOWN	UP	YES
17312022	Ccn4	cellular communication network factor 4	1.02776	5.99735	4.3514	0.000218077	0.0111176	0.594417	Ccn4	mmu-miR-30d-5p	-0.962649	0.00493363	DOWN	UP	YES
17404821	Ccna2	cyclin A2	1.62017	6.82292	5.93472	4.07737e-06	0.000787751	4.38686	Ccna2	mmu-let-7b-5p	-0.818467	0.041336	DOWN	UP	YES
17404821	Ccna2	cyclin A2	1.62017	6.82292	5.93472	4.07737e-06	0.000787751	4.38686	Ccna2	mmu-let-7c-5p	-1.47774	0.00234926	DOWN	UP	YES
17404821	Ccna2	cyclin A2	1.62017	6.82292	5.93472	4.07737e-06	0.000787751	4.38686	Ccna2	mmu-miR-181b-5p	-1.18269	0.0379446	DOWN	UP	YES
17404821	Ccna2	cyclin A2	1.62017	6.82292	5.93472	4.07737e-06	0.000787751	4.38686	Ccna2	mmu-miR-29b-3p	-0.802632	0.0418224	DOWN	UP	YES
17404821	Ccna2	cyclin A2	1.62017	6.82292	5.93472	4.07737e-06	0.000787751	4.38686	Ccna2	mmu-miR-29c-3p	-0.802632	0.0418224	DOWN	UP	YES
17295757	Ccnb1	cyclin B1	0.902229	5.46526	3.37492	0.00251867	0.05365	-1.71483	Ccnb1	mmu-miR-23b-3p	-1.06605	0.0198663	DOWN	UP	YES
17528586	Ccnb2	cyclin B2	1.36163	7.12923	4.81092	6.79463e-05	0.00516404	1.70457	Ccnb2	mmu-miR-30d-5p	-0.962649	0.00493363	DOWN	UP	YES
17498502	Ccnd1	cyclin D1	0.663226	9.42656	3.53612	0.00169339	0.0422021	-1.34312	Ccnd1	mmu-let-7b-5p	-0.818467	0.041336	DOWN	UP	YES
17498502	Ccnd1	cyclin D1	0.663226	9.42656	3.53612	0.00169339	0.0422021	-1.34312	Ccnd1	mmu-let-7c-5p	-1.47774	0.00234926	DOWN	UP	YES
17411761	Ccne2	cyclin E2	0.591935	5.60944	3.36308	0.00259276	0.0548607	-1.74192	Ccne2	mmu-let-7b-5p	-0.818467	0.041336	DOWN	UP	YES
17411761	Ccne2	cyclin E2	0.591935	5.60944	3.36308	0.00259276	0.0548607	-1.74192	Ccne2	mmu-let-7c-5p	-1.47774	0.00234926	DOWN	UP	YES
17411761	Ccne2	cyclin E2	0.591935	5.60944	3.36308	0.00259276	0.0548607	-1.74192	Ccne2	mmu-miR-29b-3p	-0.802632	0.0418224	DOWN	UP	YES
17411761	Ccne2	cyclin E2	0.591935	5.60944	3.36308	0.00259276	0.0548607	-1.74192	Ccne2	mmu-miR-29c-3p	-0.802632	0.0418224	DOWN	UP	YES
17411761	Ccne2	cyclin E2	0.591935	5.60944	3.36308	0.00259276	0.0548607	-1.74192	Ccne2	mmu-miR-30d-5p	-0.962649	0.00493363	DOWN	UP	YES
17261865	Ccng1	cyclin G1	1.28401	9.97103	4.32305	0.000234342	0.0116123	0.526057	Ccng1	mmu-miR-181b-5p	-1.18269	0.0379446	DOWN	UP	YES
17245171	Cct2	chaperonin containing Tcp1, subunit 2 (beta)	0.615247	9.9694	3.10418	0.00485591	0.0805003	-2.32556	Cct2	mmu-let-7b-5p	-0.818467	0.041336	DOWN	UP	YES
17245171	Cct2	chaperonin containing Tcp1, subunit 2 (beta)	0.615247	9.9694	3.10418	0.00485591	0.0805003	-2.32556	Cct2	mmu-let-7c-5p	-1.47774	0.00234926	DOWN	UP	YES
17245171	Cct2	chaperonin containing Tcp1, subunit 2 (beta)	0.615247	9.9694	3.10418	0.00485591	0.0805003	-2.32556	Cct2	mmu-miR-297a-5p	-1.26548	0.0305066	DOWN	UP	YES
17247656	Cct4	chaperonin containing Tcp1, subunit 4 (delta)	0.538848	8.45811	2.97792	0.00656013	0.0972012	-2.60342	Cct4	mmu-miR-181b-5p	-1.18269	0.0379446	DOWN	UP	YES
17247656	Cct4	chaperonin containing Tcp1, subunit 4 (delta)	0.538848	8.45811	2.97792	0.00656013	0.0972012	-2.60342	Cct4	mmu-miR-297a-5p	-1.26548	0.0305066	DOWN	UP	YES
17460293	Cct7	chaperonin containing Tcp1, subunit 7 (eta)	0.509681	8.27119	3.42716	0.00221557	0.0496224	-1.59495	Cct7	mmu-miR-30d-5p	-0.962649	0.00493363	DOWN	UP	YES
17353747	Cd14	CD14 antigen	1.0242	7.71782	4.09784	0.000414534	0.0167489	-0.0152587	Cd14	mmu-let-7b-5p	-0.818467	0.041336	DOWN	UP	YES
17358544	Cd274	CD274 antigen	0.590148	7.86297	2.67661	0.0132247	0.146785	-3.24479	Cd274	mmu-let-7b-5p	-0.818467	0.041336	DOWN	UP	YES
17358544	Cd274	CD274 antigen	0.590148	7.86297	2.67661	0.0132247	0.146785	-3.24479	Cd274	mmu-let-7c-5p	-1.47774	0.00234926	DOWN	UP	YES
17358544	Cd274	CD274 antigen	0.590148	7.86297	2.67661	0.0132247	0.146785	-3.24479	Cd274	mmu-miR-103-3p	-0.833679	0.0367714	DOWN	UP	YES
17490149	Cd33	CD33 antigen	0.964561	8.96042	4.47726	0.000158447	0.00892163	0.898176	Cd33	mmu-miR-3064-3p	-0.505052	0.0268297	DOWN	UP	YES
17526464	Cd3e	CD3 antigen, epsilon polypeptide	0.606387	8.26978	2.23333	0.0351579	0.251575	-4.11921	Cd3e	mmu-let-7b-5p	-0.818467	0.041336	DOWN	UP	YES
17526464	Cd3e	CD3 antigen, epsilon polypeptide	0.606387	8.26978	2.23333	0.0351579	0.251575	-4.11921	Cd3e	mmu-let-7c-5p	-1.47774	0.00234926	DOWN	UP	YES
17388733	Cd44	CD44 antigen	0.623762	8.86402	3.69005	0.00115513	0.0333512	-0.983596	Cd44	mmu-miR-29b-3p	-0.802632	0.0418224	DOWN	UP	YES
17431174	Cd52	CD52 antigen	1.0258	8.63315	4.81628	6.70295e-05	0.00510375	1.71752	Cd52	mmu-let-7b-5p	-0.818467	0.041336	DOWN	UP	YES
17431174	Cd52	CD52 antigen	1.0258	8.63315	4.81628	6.70295e-05	0.00510375	1.71752	Cd52	mmu-let-7c-5p	-1.47774	0.00234926	DOWN	UP	YES
17408960	Cd53	CD53 antigen	1.18136	9.29191	3.93749	0.000621239	0.0221806	-0.398285	Cd53	mmu-let-7b-5p	-0.818467	0.041336	DOWN	UP	YES
17408960	Cd53	CD53 antigen	1.18136	9.29191	3.93749	0.000621239	0.0221806	-0.398285	Cd53	mmu-miR-29b-3p	-0.802632	0.0418224	DOWN	UP	YES
17408960	Cd53	CD53 antigen	1.18136	9.29191	3.93749	0.000621239	0.0221806	-0.398285	Cd53	mmu-miR-29c-3p	-0.802632	0.0418224	DOWN	UP	YES
17312774	Cdc42ep1	CDC42 effector protein (Rho GTPase binding) 1	-0.589911	8.78384	-2.48529	0.0203451	0.186346	-3.63345	Cdc42ep1	mmu-miR-133a-3p	0.967884	0.0235242	UP	DOWN	YES
17256225	Cdc6	cell division cycle 6	0.571987	5.48789	3.4661	0.00201309	0.046741	-1.50524	Cdc6	mmu-let-7c-5p	-1.47774	0.00234926	DOWN	UP	YES
17512153	Cdh11	cadherin 11	0.538479	9.23333	1.50235	0.146111	0.515662	-5.31787	Cdh11	mmu-miR-181b-5p	-1.18269	0.0379446	DOWN	UP	YES
17512153	Cdh11	cadherin 11	0.538479	9.23333	1.50235	0.146111	0.515662	-5.31787	Cdh11	mmu-miR-297a-5p	-1.26548	0.0305066	DOWN	UP	YES
17241692	Cdk1	cyclin-dependent kinase 1	1.37366	6.06659	5.05674	3.64758e-05	0.00344313	2.29773	Cdk1	mmu-miR-30d-5p	-0.962649	0.00493363	DOWN	UP	YES
17335467	Cdkn1a	cyclin-dependent kinase inhibitor 1A (P21)	1.45192	10.1873	3.58217	0.00151075	0.0392104	-1.23599	Cdkn1a	mmu-miR-29b-3p	-0.802632	0.0418224	DOWN	UP	YES
17335467	Cdkn1a	cyclin-dependent kinase inhibitor 1A (P21)	1.45192	10.1873	3.58217	0.00151075	0.0392104	-1.23599	Cdkn1a	mmu-miR-29c-3p	-0.802632	0.0418224	DOWN	UP	YES
17428217	Cdkn2c	cyclin dependent kinase inhibitor 2C	0.516891	6.77515	1.85019	0.0766943	0.382962	-4.79091	Cdkn2c	mmu-let-7c-5p	-1.47774	0.00234926	DOWN	UP	YES
17230918	Cenpf	centromere protein F	0.681707	6.05028	2.8218	0.00946364	0.120392	-2.93986	Cenpf	mmu-miR-674-5p	-0.546437	0.0466459	DOWN	UP	YES
17344990	Cenpq	centromere protein Q	0.559451	4.93282	1.60966	0.12061	0.473247	-5.16453	Cenpq	mmu-let-7b-5p	-0.818467	0.041336	DOWN	UP	YES
17344990	Cenpq	centromere protein Q	0.559451	4.93282	1.60966	0.12061	0.473247	-5.16453	Cenpq	mmu-let-7c-5p	-1.47774	0.00234926	DOWN	UP	YES
17344990	Cenpq	centromere protein Q	0.559451	4.93282	1.60966	0.12061	0.473247	-5.16453	Cenpq	mmu-miR-30d-5p	-0.962649	0.00493363	DOWN	UP	YES
17359098	Cep55	centrosomal protein 55	0.770759	5.32053	3.20674	0.00379325	0.0694253	-2.09644	Cep55	mmu-let-7b-5p	-0.818467	0.041336	DOWN	UP	YES
17359098	Cep55	centrosomal protein 55	0.770759	5.32053	3.20674	0.00379325	0.0694253	-2.09644	Cep55	mmu-let-7c-5p	-1.47774	0.00234926	DOWN	UP	YES
17368930	Cercam	cerebral endothelial cell adhesion molecule	0.597243	6.74889	3.67494	0.00119948	0.0342965	-1.01906	Cercam	mmu-let-7b-5p	-0.818467	0.041336	DOWN	UP	YES
17365571	Cfap43	cilia and flagella associated protein 43	-0.565825	7.81758	-2.75288	0.0111016	0.132498	-3.08562	Cfap43	mmu-miR-133a-3p	0.967884	0.0235242	UP	DOWN	YES
17402572	Cfi	complement component factor i	0.866648	5.34681	3.91026	0.000665305	0.0231393	-0.463077	Cfi	mmu-miR-30d-5p	-0.962649	0.00493363	DOWN	UP	YES
17364111	Ch25h	cholesterol 25-hydroxylase	2.19354	7.42998	5.82243	5.377e-06	0.000918645	4.12334	Ch25h	mmu-let-7b-5p	-0.818467	0.041336	DOWN	UP	YES
17461205	Chl1	cell adhesion molecule L1-like	2.36673	5.66951	5.23289	2.33966e-05	0.00251804	2.72129	Chl1	mmu-let-7b-5p	-0.818467	0.041336	DOWN	UP	YES
17461205	Chl1	cell adhesion molecule L1-like	2.36673	5.66951	5.23289	2.33966e-05	0.00251804	2.72129	Chl1	mmu-let-7c-5p	-1.47774	0.00234926	DOWN	UP	YES
17461205	Chl1	cell adhesion molecule L1-like	2.36673	5.66951	5.23289	2.33966e-05	0.00251804	2.72129	Chl1	mmu-miR-1192	-0.92619	0.007197	DOWN	UP	YES
17461205	Chl1	cell adhesion molecule L1-like	2.36673	5.66951	5.23289	2.33966e-05	0.00251804	2.72129	Chl1	mmu-miR-181b-5p	-1.18269	0.0379446	DOWN	UP	YES
17461205	Chl1	cell adhesion molecule L1-like	2.36673	5.66951	5.23289	2.33966e-05	0.00251804	2.72129	Chl1	mmu-miR-30d-5p	-0.962649	0.00493363	DOWN	UP	YES
17276614	Churc1	churchill domain containing 1	0.940551	6.68867	4.02505	0.000498204	0.0190901	-0.189435	Churc1	mmu-miR-674-5p	-0.546437	0.0466459	DOWN	UP	YES
17518672	Ciao2a	cytosolic iron-sulfur assembly component 2A	0.891148	8.05497	3.3321	0.00279677	0.0575671	-1.81262	Ciao2a	mmu-let-7b-5p	-0.818467	0.041336	DOWN	UP	YES
17518672	Ciao2a	cytosolic iron-sulfur assembly component 2A	0.891148	8.05497	3.3321	0.00279677	0.0575671	-1.81262	Ciao2a	mmu-let-7c-5p	-1.47774	0.00234926	DOWN	UP	YES
17518672	Ciao2a	cytosolic iron-sulfur assembly component 2A	0.891148	8.05497	3.3321	0.00279677	0.0575671	-1.81262	Ciao2a	mmu-miR-3064-3p	-0.505052	0.0268297	DOWN	UP	YES
17306867	Cideb	cell death-inducing DNA fragmentation factor, alpha subunit-like effector B	0.886074	6.25482	4.84182	6.28278e-05	0.00487358	1.77923	Cideb	mmu-miR-29b-3p	-0.802632	0.0418224	DOWN	UP	YES
17231784	Cited2	Cbp/p300-interacting transactivator, with Glu/Asp-rich carboxy-terminal domain, 2	-0.62707	9.97226	-3.09022	0.00502106	0.0822161	-2.35652	Cited2	mmu-miR-133a-3p	0.967884	0.0235242	UP	DOWN	YES
17539797	Clcn5	chloride channel, voltage-sensitive 5	0.928628	6.98025	5.61477	8.99691e-06	0.00131571	3.63276	Clcn5	mmu-let-7b-5p	-0.818467	0.041336	DOWN	UP	YES
17539797	Clcn5	chloride channel, voltage-sensitive 5	0.928628	6.98025	5.61477	8.99691e-06	0.00131571	3.63276	Clcn5	mmu-let-7c-5p	-1.47774	0.00234926	DOWN	UP	YES
17334545	Clcn7	chloride channel, voltage-sensitive 7	0.632234	7.32711	4.19189	0.000326749	0.0144236	0.210414	Clcn7	mmu-miR-29b-3p	-0.802632	0.0418224	DOWN	UP	YES
17428430	Cmpk1	cytidine monophosphate (UMP-CMP) kinase 1	0.574981	7.26824	2.75576	0.011028	0.132008	-3.07956	Cmpk1	mmu-miR-29b-3p	-0.802632	0.0418224	DOWN	UP	YES
17305719	Cnih1	cornichon family AMPA receptor auxiliary protein 1	0.508891	7.29756	2.14299	0.0425101	0.278778	-4.28534	Cnih1	mmu-let-7b-5p	-0.818467	0.041336	DOWN	UP	YES
17305719	Cnih1	cornichon family AMPA receptor auxiliary protein 1	0.508891	7.29756	2.14299	0.0425101	0.278778	-4.28534	Cnih1	mmu-let-7c-5p	-1.47774	0.00234926	DOWN	UP	YES
17529099	Col12a1	collagen, type XII, alpha 1	0.831269	7.29727	2.07724	0.0487018	0.299773	-4.40336	Col12a1	mmu-miR-30d-5p	-0.962649	0.00493363	DOWN	UP	YES
17255260	Col1a1	collagen, type I, alpha 1	1.20855	9.781	3.02764	0.00582986	0.0903771	-2.49457	Col1a1	mmu-let-7b-5p	-0.818467	0.041336	DOWN	UP	YES
17255260	Col1a1	collagen, type I, alpha 1	1.20855	9.781	3.02764	0.00582986	0.0903771	-2.49457	Col1a1	mmu-let-7c-5p	-1.47774	0.00234926	DOWN	UP	YES
17255260	Col1a1	collagen, type I, alpha 1	1.20855	9.781	3.02764	0.00582986	0.0903771	-2.49457	Col1a1	mmu-miR-29b-3p	-0.802632	0.0418224	DOWN	UP	YES
17455801	Col1a2	collagen, type I, alpha 2	0.741493	9.18739	2.2971	0.0306843	0.233035	-3.9993	Col1a2	mmu-let-7b-5p	-0.818467	0.041336	DOWN	UP	YES
17455801	Col1a2	collagen, type I, alpha 2	0.741493	9.18739	2.2971	0.0306843	0.233035	-3.9993	Col1a2	mmu-let-7c-5p	-1.47774	0.00234926	DOWN	UP	YES
17455801	Col1a2	collagen, type I, alpha 2	0.741493	9.18739	2.2971	0.0306843	0.233035	-3.9993	Col1a2	mmu-miR-29b-3p	-0.802632	0.0418224	DOWN	UP	YES
17212461	Col3a1	collagen, type III, alpha 1	0.872237	9.16051	2.95799	0.0068768	0.099622	-2.64683	Col3a1	mmu-miR-29b-3p	-0.802632	0.0418224	DOWN	UP	YES
17222719	Col5a2	collagen, type V, alpha 2	1.1035	7.47704	4.6021	0.00011541	0.007197	1.19984	Col5a2	mmu-miR-29b-3p	-0.802632	0.0418224	DOWN	UP	YES
17331162	Col8a1	collagen, type VIII, alpha 1	1.20903	6.86012	6.00514	3.42995e-06	0.000688404	4.55147	Col8a1	mmu-miR-29b-3p	-0.802632	0.0418224	DOWN	UP	YES
17331162	Col8a1	collagen, type VIII, alpha 1	1.20903	6.86012	6.00514	3.42995e-06	0.000688404	4.55147	Col8a1	mmu-miR-5101	-0.666545	0.00398603	DOWN	UP	YES
17502280	Colgalt1	collagen beta(1-O)galactosyltransferase 1	0.671335	8.81355	4.6388	0.000105146	0.00680541	1.28854	Colgalt1	mmu-miR-29b-3p	-0.802632	0.0418224	DOWN	UP	YES
17513491	Cotl1	coactosin-like 1 (Dictyostelium)	1.18045	8.58741	6.61047	7.9332e-07	0.000244775	5.94247	Cotl1	mmu-miR-30d-5p	-0.962649	0.00493363	DOWN	UP	YES
17517727	Cox5a	cytochrome c oxidase subunit 5A	0.886931	8.47088	3.75744	0.000976185	0.0299187	-0.825023	Cox5a	mmu-miR-103-3p	-0.833679	0.0367714	DOWN	UP	YES
17489223	Cox6b1	cytochrome c oxidase, subunit 6B1	0.811142	8.42782	3.13119	0.00455112	0.0770541	-2.2655	Cox6b1	mmu-let-7b-5p	-0.818467	0.041336	DOWN	UP	YES
17489223	Cox6b1	cytochrome c oxidase, subunit 6B1	0.811142	8.42782	3.13119	0.00455112	0.0770541	-2.2655	Cox6b1	mmu-let-7c-5p	-1.47774	0.00234926	DOWN	UP	YES
17388389	Cry2	cryptochrome 2 (photolyase-like)	-0.643564	7.67094	-2.89454	0.0079847	0.109097	-2.78414	Cry2	mmu-miR-692	0.6296	0.0221784	UP	DOWN	YES
17351053	Csf1r	colony stimulating factor 1 receptor	0.842702	8.90922	3.55642	0.00161035	0.0409472	-1.29594	Csf1r	mmu-miR-103-3p	-0.833679	0.0367714	DOWN	UP	YES
17366170	Csf2ra	colony stimulating factor 2 receptor, alpha, low-affinity (granulocyte-macrophage)	0.766193	9.24342	2.94736	0.00705143	0.100833	-2.66991	Csf2ra	mmu-miR-3064-5p	-0.505052	0.0268297	DOWN	UP	YES
17312716	Csf2rb	colony stimulating factor 2 receptor, beta, low-affinity (granulocyte-macrophage)	0.75282	7.1586	3.35015	0.00267609	0.0557407	-1.77145	Csf2rb	mmu-let-7b-5p	-0.818467	0.041336	DOWN	UP	YES
17312716	Csf2rb	colony stimulating factor 2 receptor, beta, low-affinity (granulocyte-macrophage)	0.75282	7.1586	3.35015	0.00267609	0.0557407	-1.77145	Csf2rb	mmu-miR-30d-5p	-0.962649	0.00493363	DOWN	UP	YES
17318950	Csf2rb2	colony stimulating factor 2 receptor, beta 2, low-affinity (granulocyte-macrophage)	1.31272	7.52091	5.74035	6.58722e-06	0.00108035	3.92991	Csf2rb2	mmu-let-7b-5p	-0.818467	0.041336	DOWN	UP	YES
17418485	Csf3r	colony stimulating factor 3 receptor (granulocyte)	0.551064	8.58483	2.13544	0.0431838	0.280994	-4.29902	Csf3r	mmu-miR-3064-5p	-0.505052	0.0268297	DOWN	UP	YES
17234803	Cstb	cystatin B	1.51965	8.15343	6.53218	9.56458e-07	0.000264439	5.76513	Cstb	mmu-let-7c-5p	-1.47774	0.00234926	DOWN	UP	YES
17522958	Ctdspl	CTD (carboxy-terminal domain, RNA polymerase II, polypeptide A) small phosphatase-like	-0.607473	8.67241	-3.15478	0.00430002	0.0747621	-2.21287	Ctdspl	mmu-miR-133a-3p	0.967884	0.0235242	UP	DOWN	YES
17213478	Ctla4	cytotoxic T-lymphocyte-associated protein 4	0.584474	5.0274	3.58966	0.00148293	0.0387747	-1.21853	Ctla4	mmu-let-7b-5p	-0.818467	0.041336	DOWN	UP	YES
17213478	Ctla4	cytotoxic T-lymphocyte-associated protein 4	0.584474	5.0274	3.58966	0.00148293	0.0387747	-1.21853	Ctla4	mmu-let-7c-5p	-1.47774	0.00234926	DOWN	UP	YES
17213478	Ctla4	cytotoxic T-lymphocyte-associated protein 4	0.584474	5.0274	3.58966	0.00148293	0.0387747	-1.21853	Ctla4	mmu-miR-23b-3p	-1.06605	0.0198663	DOWN	UP	YES
17421821	Ctnnbip1	catenin beta interacting protein 1	0.503646	6.67808	3.29143	0.00308845	0.0612726	-1.90513	Ctnnbip1	mmu-miR-29b-3p	-0.802632	0.0418224	DOWN	UP	YES
17379560	Ctsa	cathepsin A	0.882065	9.6707	4.30426	0.000245777	0.0120399	0.480791	Ctsa	mmu-let-7b-5p	-0.818467	0.041336	DOWN	UP	YES
17379560	Ctsa	cathepsin A	0.882065	9.6707	4.30426	0.000245777	0.0120399	0.480791	Ctsa	mmu-let-7c-5p	-1.47774	0.00234926	DOWN	UP	YES
17379560	Ctsa	cathepsin A	0.882065	9.6707	4.30426	0.000245777	0.0120399	0.480791	Ctsa	mmu-miR-29b-3p	-0.802632	0.0418224	DOWN	UP	YES
17301213	Ctsb	cathepsin B	1.35814	11.6403	5.10361	3.24055e-05	0.00318243	2.41058	Ctsb	mmu-let-7b-5p	-0.818467	0.041336	DOWN	UP	YES
17301213	Ctsb	cathepsin B	1.35814	11.6403	5.10361	3.24055e-05	0.00318243	2.41058	Ctsb	mmu-let-7c-5p	-1.47774	0.00234926	DOWN	UP	YES
17480018	Ctsc	cathepsin C	0.882755	10.1692	2.36537	0.0264761	0.215506	-3.86859	Ctsc	mmu-let-7b-5p	-0.818467	0.041336	DOWN	UP	YES
17480018	Ctsc	cathepsin C	0.882755	10.1692	2.36537	0.0264761	0.215506	-3.86859	Ctsc	mmu-let-7c-5p	-1.47774	0.00234926	DOWN	UP	YES
17480018	Ctsc	cathepsin C	0.882755	10.1692	2.36537	0.0264761	0.215506	-3.86859	Ctsc	mmu-miR-181b-5p	-1.18269	0.0379446	DOWN	UP	YES
17480018	Ctsc	cathepsin C	0.882755	10.1692	2.36537	0.0264761	0.215506	-3.86859	Ctsc	mmu-miR-29b-3p	-0.802632	0.0418224	DOWN	UP	YES
17400365	Ctsk	cathepsin K	1.98517	7.90584	7.98	3.41232e-08	4.86491e-05	8.90515	Ctsk	mmu-miR-29c-3p	-0.802632	0.0418224	DOWN	UP	YES
17293706	Ctsl	cathepsin L	1.41662	9.52235	7.53299	9.27659e-08	6.85427e-05	7.9683	Ctsl	mmu-let-7b-5p	-0.818467	0.041336	DOWN	UP	YES
17293706	Ctsl	cathepsin L	1.41662	9.52235	7.53299	9.27659e-08	6.85427e-05	7.9683	Ctsl	mmu-let-7c-5p	-1.47774	0.00234926	DOWN	UP	YES
17400375	Ctss	cathepsin S	1.67432	10.6748	7.6589	6.98042e-08	6.08253e-05	8.23523	Ctss	mmu-miR-29b-3p	-0.802632	0.0418224	DOWN	UP	YES
17532268	Cx3cr1	chemokine (C-X3-C motif) receptor 1	0.50988	7.65794	2.69015	0.0128221	0.14437	-3.21671	Cx3cr1	mmu-miR-674-5p	-0.546437	0.0466459	DOWN	UP	YES
17449718	Cxcl10	chemokine (C-X-C motif) ligand 10	1.84101	6.1897	5.72722	6.80494e-06	0.00109475	3.89892	Cxcl10	mmu-let-7c-5p	-1.47774	0.00234926	DOWN	UP	YES
17265268	Cxcl16	chemokine (C-X-C motif) ligand 16	1.03516	9.24425	5.02815	3.92072e-05	0.00362645	2.22885	Cxcl16	mmu-let-7c-5p	-1.47774	0.00234926	DOWN	UP	YES
17214142	Cxcr2	chemokine (C-X-C motif) receptor 2	0.727508	7.85697	2.78116	0.0103995	0.127483	-3.02603	Cxcr2	mmu-let-7b-5p	-0.818467	0.041336	DOWN	UP	YES
17214142	Cxcr2	chemokine (C-X-C motif) receptor 2	0.727508	7.85697	2.78116	0.0103995	0.127483	-3.02603	Cxcr2	mmu-let-7c-5p	-1.47774	0.00234926	DOWN	UP	YES
17214142	Cxcr2	chemokine (C-X-C motif) receptor 2	0.727508	7.85697	2.78116	0.0103995	0.127483	-3.02603	Cxcr2	mmu-miR-674-5p	-0.546437	0.0466459	DOWN	UP	YES
17445308	Cyp51	cytochrome P450, family 51	0.558158	7.36977	2.30842	0.029947	0.230355	-3.97779	Cyp51	mmu-let-7b-5p	-0.818467	0.041336	DOWN	UP	YES
17445308	Cyp51	cytochrome P450, family 51	0.558158	7.36977	2.30842	0.029947	0.230355	-3.97779	Cyp51	mmu-let-7c-5p	-1.47774	0.00234926	DOWN	UP	YES
17445308	Cyp51	cytochrome P450, family 51	0.558158	7.36977	2.30842	0.029947	0.230355	-3.97779	Cyp51	mmu-miR-29b-3p	-0.802632	0.0418224	DOWN	UP	YES
17445308	Cyp51	cytochrome P450, family 51	0.558158	7.36977	2.30842	0.029947	0.230355	-3.97779	Cyp51	mmu-miR-29c-3p	-0.802632	0.0418224	DOWN	UP	YES
17445308	Cyp51	cytochrome P450, family 51	0.558158	7.36977	2.30842	0.029947	0.230355	-3.97779	Cyp51	mmu-miR-30d-5p	-0.962649	0.00493363	DOWN	UP	YES
17438823	Dck	deoxycytidine kinase	0.913138	6.95585	5.224	2.39255e-05	0.00254788	2.69997	Dck	mmu-miR-23b-3p	-1.06605	0.0198663	DOWN	UP	YES
17397708	Dclk1	doublecortin-like kinase 1	0.677544	6.67979	4.9657	4.59133e-05	0.00405617	2.07827	Dclk1	mmu-miR-29b-3p	-0.802632	0.0418224	DOWN	UP	YES
17305685	Ddhd1	DDHD domain containing 1	0.770529	9.07079	4.39642	0.000194536	0.01022	0.703007	Ddhd1	mmu-let-7b-5p	-0.818467	0.041336	DOWN	UP	YES
17305685	Ddhd1	DDHD domain containing 1	0.770529	9.07079	4.39642	0.000194536	0.01022	0.703007	Ddhd1	mmu-let-7c-5p	-1.47774	0.00234926	DOWN	UP	YES
17241032	Ddit4	DNA-damage-inducible transcript 4	0.687037	7.8007	2.92762	0.00738737	0.104188	-2.71272	Ddit4	mmu-let-7b-5p	-0.818467	0.041336	DOWN	UP	YES
17241032	Ddit4	DNA-damage-inducible transcript 4	0.687037	7.8007	2.92762	0.00738737	0.104188	-2.71272	Ddit4	mmu-miR-181b-5p	-1.18269	0.0379446	DOWN	UP	YES
17241032	Ddit4	DNA-damage-inducible transcript 4	0.687037	7.8007	2.92762	0.00738737	0.104188	-2.71272	Ddit4	mmu-miR-30d-5p	-0.962649	0.00493363	DOWN	UP	YES
17546834	Ddx3y	DEAD (Asp-Glu-Ala-Asp) box polypeptide 3, Y-linked	1.1224	7.88869	1.17007	0.253516	0.654627	-5.73563	Ddx3y	mmu-miR-29b-3p	-0.802632	0.0418224	DOWN	UP	YES
17230595	Degs1	delta(4)-desaturase, sphingolipid 1	0.576851	7.993	3.35138	0.00266802	0.0556836	-1.76863	Degs1	mmu-miR-181b-5p	-1.18269	0.0379446	DOWN	UP	YES
17230595	Degs1	delta(4)-desaturase, sphingolipid 1	0.576851	7.993	3.35138	0.00266802	0.0556836	-1.76863	Degs1	mmu-miR-23b-3p	-1.06605	0.0198663	DOWN	UP	YES
17230595	Degs1	delta(4)-desaturase, sphingolipid 1	0.576851	7.993	3.35138	0.00266802	0.0556836	-1.76863	Degs1	mmu-miR-30d-5p	-0.962649	0.00493363	DOWN	UP	YES
17403919	Depdc1a	DEP domain containing 1a	1.10288	4.58943	4.67671	9.55004e-05	0.00639946	1.38019	Depdc1a	mmu-miR-29b-3p	-0.802632	0.0418224	DOWN	UP	YES
17463898	Dera	deoxyribose-phosphate aldolase (putative)	0.534905	7.15571	3.9435	0.000611903	0.021923	-0.383965	Dera	mmu-miR-29b-3p	-0.802632	0.0418224	DOWN	UP	YES
17305789	Dlgap5	DLG associated protein 5	0.538673	6.28206	2.82675	0.00935521	0.119528	-2.92931	Dlgap5	mmu-miR-3064-5p	-0.505052	0.0268297	DOWN	UP	YES
17401987	Dph5	diphthamide biosynthesis 5	0.543764	6.32159	3.36224	0.00259811	0.0549175	-1.74384	Dph5	mmu-miR-181b-5p	-1.18269	0.0379446	DOWN	UP	YES
17401987	Dph5	diphthamide biosynthesis 5	0.543764	6.32159	3.36224	0.00259811	0.0549175	-1.74384	Dph5	mmu-miR-674-5p	-0.546437	0.0466459	DOWN	UP	YES
17361404	Dpp3	dipeptidylpeptidase 3	0.525872	8.44544	2.56584	0.016996	0.169162	-3.47174	Dpp3	mmu-let-7b-5p	-0.818467	0.041336	DOWN	UP	YES
17361404	Dpp3	dipeptidylpeptidase 3	0.525872	8.44544	2.56584	0.016996	0.169162	-3.47174	Dpp3	mmu-let-7c-5p	-1.47774	0.00234926	DOWN	UP	YES
17361404	Dpp3	dipeptidylpeptidase 3	0.525872	8.44544	2.56584	0.016996	0.169162	-3.47174	Dpp3	mmu-miR-29b-3p	-0.802632	0.0418224	DOWN	UP	YES
17361404	Dpp3	dipeptidylpeptidase 3	0.525872	8.44544	2.56584	0.016996	0.169162	-3.47174	Dpp3	mmu-miR-30d-5p	-0.962649	0.00493363	DOWN	UP	YES
17342642	Dusp1	dual specificity phosphatase 1	-0.534645	10.3489	-2.5826	0.0163672	0.165696	-3.43774	Dusp1	mmu-miR-133a-3p	0.967884	0.0235242	UP	DOWN	YES
17236882	Dusp6	dual specificity phosphatase 6	0.512529	10.1709	2.36439	0.0265329	0.215691	-3.87049	Dusp6	mmu-let-7b-5p	-0.818467	0.041336	DOWN	UP	YES
17236882	Dusp6	dual specificity phosphatase 6	0.512529	10.1709	2.36439	0.0265329	0.215691	-3.87049	Dusp6	mmu-let-7c-5p	-1.47774	0.00234926	DOWN	UP	YES
17236882	Dusp6	dual specificity phosphatase 6	0.512529	10.1709	2.36439	0.0265329	0.215691	-3.87049	Dusp6	mmu-miR-181b-5p	-1.18269	0.0379446	DOWN	UP	YES
17475787	Dyrk1b	dual-specificity tyrosine-(Y)-phosphorylation regulated kinase 1b	-0.554831	8.8571	-3.93143	0.00063079	0.0223671	-0.412713	Dyrk1b	mmu-miR-133a-3p	0.967884	0.0235242	UP	DOWN	YES
17291559	E2f3	E2F transcription factor 3	0.640697	5.92473	2.88395	0.00818531	0.110451	-2.80692	E2f3	mmu-let-7b-5p	-0.818467	0.041336	DOWN	UP	YES
17291559	E2f3	E2F transcription factor 3	0.640697	5.92473	2.88395	0.00818531	0.110451	-2.80692	E2f3	mmu-let-7c-5p	-1.47774	0.00234926	DOWN	UP	YES
17291559	E2f3	E2F transcription factor 3	0.640697	5.92473	2.88395	0.00818531	0.110451	-2.80692	E2f3	mmu-miR-23b-3p	-1.06605	0.0198663	DOWN	UP	YES
17291559	E2f3	E2F transcription factor 3	0.640697	5.92473	2.88395	0.00818531	0.110451	-2.80692	E2f3	mmu-miR-30d-5p	-0.962649	0.00493363	DOWN	UP	YES
17491378	E2f8	E2F transcription factor 8	0.954429	6.20459	3.87647	0.000724298	0.0243069	-0.543361	E2f8	mmu-miR-181b-5p	-1.18269	0.0379446	DOWN	UP	YES
17491378	E2f8	E2F transcription factor 8	0.954429	6.20459	3.87647	0.000724298	0.0243069	-0.543361	E2f8	mmu-miR-29c-3p	-0.802632	0.0418224	DOWN	UP	YES
17287148	Ecm2	extracellular matrix protein 2, female organ and adipocyte specific	-1.40353	7.29537	-3.8161	0.000842803	0.0271807	-0.686443	Ecm2	mmu-miR-133a-3p	0.967884	0.0235242	UP	DOWN	YES
17543396	Eda2r	ectodysplasin A2 receptor	1.05151	5.59097	5.48641	1.23904e-05	0.00162114	3.3276	Eda2r	mmu-let-7b-5p	-0.818467	0.041336	DOWN	UP	YES
17543396	Eda2r	ectodysplasin A2 receptor	1.05151	5.59097	5.48641	1.23904e-05	0.00162114	3.3276	Eda2r	mmu-let-7c-5p	-1.47774	0.00234926	DOWN	UP	YES
17543396	Eda2r	ectodysplasin A2 receptor	1.05151	5.59097	5.48641	1.23904e-05	0.00162114	3.3276	Eda2r	mmu-miR-29b-3p	-0.802632	0.0418224	DOWN	UP	YES
17461433	Edem1	ER degradation enhancer, mannosidase alpha-like 1	0.583356	8.74531	3.26701	0.0032775	0.0637733	-1.96048	Edem1	mmu-miR-23b-3p	-1.06605	0.0198663	DOWN	UP	YES
17286830	Edn1	endothelin 1	0.522813	8.62812	2.12603	0.0440363	0.284038	-4.31603	Edn1	mmu-let-7b-5p	-0.818467	0.041336	DOWN	UP	YES
17286830	Edn1	endothelin 1	0.522813	8.62812	2.12603	0.0440363	0.284038	-4.31603	Edn1	mmu-let-7c-5p	-1.47774	0.00234926	DOWN	UP	YES
17341356	Eef1a1	eukaryotic translation elongation factor 1 alpha 1	0.583481	11.2513	3.39511	0.00239703	0.0521237	-1.66857	Eef1a1	mmu-miR-103-3p	-0.833679	0.0367714	DOWN	UP	YES
17341356	Eef1a1	eukaryotic translation elongation factor 1 alpha 1	0.583481	11.2513	3.39511	0.00239703	0.0521237	-1.66857	Eef1a1	mmu-miR-181b-5p	-1.18269	0.0379446	DOWN	UP	YES
17449958	Eef1a1	eukaryotic translation elongation factor 1 alpha 1	0.772951	9.96437	3.16636	0.00418169	0.0736023	-2.18698	Eef1a1	mmu-miR-103-3p	-0.833679	0.0367714	DOWN	UP	YES
17449958	Eef1a1	eukaryotic translation elongation factor 1 alpha 1	0.772951	9.96437	3.16636	0.00418169	0.0736023	-2.18698	Eef1a1	mmu-miR-181b-5p	-1.18269	0.0379446	DOWN	UP	YES
17291964	Eef1e1	eukaryotic translation elongation factor 1 epsilon 1	0.97993	8.28847	3.61907	0.00137848	0.0373418	-1.14989	Eef1e1	mmu-miR-29b-3p	-0.802632	0.0418224	DOWN	UP	YES
17432341	Efhd2	EF hand domain containing 2	0.56283	9.05647	4.85698	6.04597e-05	0.00477956	1.81585	Efhd2	mmu-let-7b-5p	-0.818467	0.041336	DOWN	UP	YES
17432341	Efhd2	EF hand domain containing 2	0.56283	9.05647	4.85698	6.04597e-05	0.00477956	1.81585	Efhd2	mmu-let-7c-5p	-1.47774	0.00234926	DOWN	UP	YES
17546316	Eif2s3y	eukaryotic translation initiation factor 2, subunit 3, structural gene Y-linked	1.60985	7.29861	1.25119	0.22298	0.621564	-5.64194	Eif2s3y	mmu-miR-29b-3p	-0.802632	0.0418224	DOWN	UP	YES
17316804	Eif3e	eukaryotic translation initiation factor 3, subunit E	0.566178	8.33965	2.53042	0.0184	0.176795	-3.54322	Eif3e	mmu-miR-30d-5p	-0.962649	0.00493363	DOWN	UP	YES
17312905	Eif3l	eukaryotic translation initiation factor 3, subunit L	0.508581	8.46948	1.86987	0.0738078	0.37447	-4.75861	Eif3l	mmu-miR-103-3p	-0.833679	0.0367714	DOWN	UP	YES
17396492	Eif5a2	eukaryotic translation initiation factor 5A2	0.700811	7.36203	3.685	0.0011698	0.0337041	-0.995474	Eif5a2	mmu-let-7b-5p	-0.818467	0.041336	DOWN	UP	YES
17212018	Eif5b	eukaryotic translation initiation factor 5B	0.509653	7.93064	2.14449	0.0423779	0.278549	-4.28262	Eif5b	mmu-let-7b-5p	-0.818467	0.041336	DOWN	UP	YES
17212018	Eif5b	eukaryotic translation initiation factor 5B	0.509653	7.93064	2.14449	0.0423779	0.278549	-4.28262	Eif5b	mmu-let-7c-5p	-1.47774	0.00234926	DOWN	UP	YES
17212018	Eif5b	eukaryotic translation initiation factor 5B	0.509653	7.93064	2.14449	0.0423779	0.278549	-4.28262	Eif5b	mmu-miR-30d-5p	-0.962649	0.00493363	DOWN	UP	YES
17346975	Emilin2	elastin microfibril interfacer 2	0.814222	7.4542	5.66367	7.9672e-06	0.00123372	3.74863	Emilin2	mmu-let-7b-5p	-0.818467	0.041336	DOWN	UP	YES
17346975	Emilin2	elastin microfibril interfacer 2	0.814222	7.4542	5.66367	7.9672e-06	0.00123372	3.74863	Emilin2	mmu-miR-29b-3p	-0.802632	0.0418224	DOWN	UP	YES
17289372	Enc1	ectodermal-neural cortex 1	0.712531	7.76276	5.74032	6.58767e-06	0.00108035	3.92985	Enc1	mmu-let-7b-5p	-0.818467	0.041336	DOWN	UP	YES
17289372	Enc1	ectodermal-neural cortex 1	0.712531	7.76276	5.74032	6.58767e-06	0.00108035	3.92985	Enc1	mmu-let-7c-5p	-1.47774	0.00234926	DOWN	UP	YES
17289372	Enc1	ectodermal-neural cortex 1	0.712531	7.76276	5.74032	6.58767e-06	0.00108035	3.92985	Enc1	mmu-miR-30d-5p	-0.962649	0.00493363	DOWN	UP	YES
17500275	Erlin2	ER lipid raft associated 2	0.537069	7.42185	2.65559	0.0138738	0.150318	-3.28825	Erlin2	mmu-miR-29b-3p	-0.802632	0.0418224	DOWN	UP	YES
17500275	Erlin2	ER lipid raft associated 2	0.537069	7.42185	2.65559	0.0138738	0.150318	-3.28825	Erlin2	mmu-miR-29c-3p	-0.802632	0.0418224	DOWN	UP	YES
17307774	Esco2	establishment of sister chromatid cohesion N-acetyltransferase 2	0.857226	4.878	3.47094	0.00198918	0.0464397	-1.49404	Esco2	mmu-let-7b-5p	-0.818467	0.041336	DOWN	UP	YES
17307774	Esco2	establishment of sister chromatid cohesion N-acetyltransferase 2	0.857226	4.878	3.47094	0.00198918	0.0464397	-1.49404	Esco2	mmu-let-7c-5p	-1.47774	0.00234926	DOWN	UP	YES
17246163	Esyt1	extended synaptotagmin-like protein 1	0.649977	9.19154	3.98147	0.000556084	0.0204367	-0.293474	Esyt1	mmu-miR-23b-3p	-1.06605	0.0198663	DOWN	UP	YES
17246163	Esyt1	extended synaptotagmin-like protein 1	0.649977	9.19154	3.98147	0.000556084	0.0204367	-0.293474	Esyt1	mmu-miR-30d-5p	-0.962649	0.00493363	DOWN	UP	YES
17353541	Etf1	eukaryotic translation termination factor 1	0.529749	9.3621	2.26144	0.0331178	0.243373	-4.06662	Etf1	mmu-miR-181b-5p	-1.18269	0.0379446	DOWN	UP	YES
17353541	Etf1	eukaryotic translation termination factor 1	0.529749	9.3621	2.26144	0.0331178	0.243373	-4.06662	Etf1	mmu-miR-200b-3p	-1.17057	0.00169277	DOWN	UP	YES
17219848	Exo1	exonuclease 1	0.500773	6.03744	3.15924	0.00425403	0.0741591	-2.2029	Exo1	mmu-let-7b-5p	-0.818467	0.041336	DOWN	UP	YES
17219848	Exo1	exonuclease 1	0.500773	6.03744	3.15924	0.00425403	0.0741591	-2.2029	Exo1	mmu-let-7c-5p	-1.47774	0.00234926	DOWN	UP	YES
17317015	Ext1	exostosin glycosyltransferase 1	0.726261	8.60955	3.43945	0.00214961	0.0486456	-1.56667	Ext1	mmu-miR-29b-3p	-0.802632	0.0418224	DOWN	UP	YES
17221375	Eya1	EYA transcriptional coactivator and phosphatase 1	-0.594742	7.69726	-3.53355	0.00170419	0.042369	-1.34908	Eya1	mmu-miR-133a-3p	0.967884	0.0235242	UP	DOWN	YES
17499224	F10	coagulation factor X	0.640964	7.35773	2.96785	0.00671823	0.0983469	-2.62535	F10	mmu-miR-3064-5p	-0.505052	0.0268297	DOWN	UP	YES
17499224	F10	coagulation factor X	0.640964	7.35773	2.96785	0.00671823	0.0983469	-2.62535	F10	mmu-miR-5101	-0.666545	0.00398603	DOWN	UP	YES
17520679	Faim	Fas apoptotic inhibitory molecule	0.506405	6.99586	2.68469	0.012983	0.145272	-3.22804	Faim	mmu-miR-29b-3p	-0.802632	0.0418224	DOWN	UP	YES
17520679	Faim	Fas apoptotic inhibitory molecule	0.506405	6.99586	2.68469	0.012983	0.145272	-3.22804	Faim	mmu-miR-29c-3p	-0.802632	0.0418224	DOWN	UP	YES
17460393	Fam136a	family with sequence similarity 136, member A	0.543987	5.76719	2.68625	0.0129367	0.14499	-3.2248	Fam136a	mmu-miR-29b-3p	-0.802632	0.0418224	DOWN	UP	YES
17460393	Fam136a	family with sequence similarity 136, member A	0.543987	5.76719	2.68625	0.0129367	0.14499	-3.2248	Fam136a	mmu-miR-30d-5p	-0.962649	0.00493363	DOWN	UP	YES
17330135	Fam162a	family with sequence similarity 162, member A	0.519265	7.71578	3.67836	0.00118932	0.0341237	-1.01105	Fam162a	mmu-miR-30d-5p	-0.962649	0.00493363	DOWN	UP	YES
17292941	Fam193b	family with sequence similarity 193, member B	-0.601928	8.21099	-3.33576	0.00277191	0.057188	-1.80429	Fam193b	mmu-miR-133a-3p	0.967884	0.0235242	UP	DOWN	YES
17317486	Fam49b	family with sequence similarity 49, member B	0.975548	8.55643	5.85838	4.92048e-06	0.000867623	4.20786	Fam49b	mmu-let-7b-5p	-0.818467	0.041336	DOWN	UP	YES
17317486	Fam49b	family with sequence similarity 49, member B	0.975548	8.55643	5.85838	4.92048e-06	0.000867623	4.20786	Fam49b	mmu-let-7c-5p	-1.47774	0.00234926	DOWN	UP	YES
17317486	Fam49b	family with sequence similarity 49, member B	0.975548	8.55643	5.85838	4.92048e-06	0.000867623	4.20786	Fam49b	mmu-miR-30d-5p	-0.962649	0.00493363	DOWN	UP	YES
17390879	Fbn1	fibrillin 1	0.889438	9.11804	2.68283	0.0130383	0.145566	-3.2319	Fbn1	mmu-miR-29b-3p	-0.802632	0.0418224	DOWN	UP	YES
17447803	Fbxl5	F-box and leucine-rich repeat protein 5	0.660132	8.56569	3.38078	0.00248272	0.0531856	-1.7014	Fbxl5	mmu-miR-30d-5p	-0.962649	0.00493363	DOWN	UP	YES
17231662	Fbxo30	F-box protein 30	-0.55864	8.04416	-2.82773	0.00933395	0.119366	-2.92723	Fbxo30	mmu-miR-133a-3p	0.967884	0.0235242	UP	DOWN	YES
17397129	Fgf2	fibroblast growth factor 2	0.525813	6.68226	2.71727	0.0120495	0.139013	-3.16022	Fgf2	mmu-let-7b-5p	-0.818467	0.041336	DOWN	UP	YES
17397129	Fgf2	fibroblast growth factor 2	0.525813	6.68226	2.71727	0.0120495	0.139013	-3.16022	Fgf2	mmu-let-7c-5p	-1.47774	0.00234926	DOWN	UP	YES
17397129	Fgf2	fibroblast growth factor 2	0.525813	6.68226	2.71727	0.0120495	0.139013	-3.16022	Fgf2	mmu-miR-30d-5p	-0.962649	0.00493363	DOWN	UP	YES
17229020	Fmo1	flavin containing monooxygenase 1	-1.45592	9.91854	-9.26611	2.2264e-09	8.36822e-06	11.4318	Fmo1	mmu-miR-133a-3p	0.967884	0.0235242	UP	DOWN	YES
17224071	Fn1	fibronectin 1	1.56333	11.3461	4.13701	0.000375443	0.0157112	0.0786429	Fn1	mmu-miR-29b-3p	-0.802632	0.0418224	DOWN	UP	YES
17406066	Fnip2	folliculin interacting protein 2	0.786991	7.78564	5.86648	4.82316e-06	0.000867623	4.22688	Fnip2	mmu-let-7b-5p	-0.818467	0.041336	DOWN	UP	YES
17406066	Fnip2	folliculin interacting protein 2	0.786991	7.78564	5.86648	4.82316e-06	0.000867623	4.22688	Fnip2	mmu-let-7c-5p	-1.47774	0.00234926	DOWN	UP	YES
17406066	Fnip2	folliculin interacting protein 2	0.786991	7.78564	5.86648	4.82316e-06	0.000867623	4.22688	Fnip2	mmu-miR-30d-5p	-0.962649	0.00493363	DOWN	UP	YES
17277387	Fos	FBJ osteosarcoma oncogene	0.562355	7.33849	3.28967	0.00310171	0.0613531	-1.90912	Fos	mmu-let-7c-5p	-1.47774	0.00234926	DOWN	UP	YES
17277387	Fos	FBJ osteosarcoma oncogene	0.562355	7.33849	3.28967	0.00310171	0.0613531	-1.90912	Fos	mmu-miR-181b-5p	-1.18269	0.0379446	DOWN	UP	YES
17356427	Fosl1	fos-like antigen 1	0.931502	5.59356	4.83887	6.32993e-05	0.00489179	1.7721	Fosl1	mmu-let-7b-5p	-0.818467	0.041336	DOWN	UP	YES
17356427	Fosl1	fos-like antigen 1	0.931502	5.59356	4.83887	6.32993e-05	0.00489179	1.7721	Fosl1	mmu-let-7c-5p	-1.47774	0.00234926	DOWN	UP	YES
17444267	Fscn1	fascin actin-bundling protein 1	0.864727	7.22907	5.19404	2.58001e-05	0.00267345	2.62801	Fscn1	mmu-let-7b-5p	-0.818467	0.041336	DOWN	UP	YES
17444267	Fscn1	fascin actin-bundling protein 1	0.864727	7.22907	5.19404	2.58001e-05	0.00267345	2.62801	Fscn1	mmu-let-7c-5p	-1.47774	0.00234926	DOWN	UP	YES
17444267	Fscn1	fascin actin-bundling protein 1	0.864727	7.22907	5.19404	2.58001e-05	0.00267345	2.62801	Fscn1	mmu-miR-29b-3p	-0.802632	0.0418224	DOWN	UP	YES
17296344	Fst	follistatin	1.09252	7.41963	5.02111	3.99104e-05	0.00367505	2.2119	Fst	mmu-let-7c-5p	-1.47774	0.00234926	DOWN	UP	YES
17325514	Fstl1	follistatin-like 1	0.552049	8.52746	2.72998	0.0117027	0.136987	-3.13364	Fstl1	mmu-let-7b-5p	-0.818467	0.041336	DOWN	UP	YES
17325514	Fstl1	follistatin-like 1	0.552049	8.52746	2.72998	0.0117027	0.136987	-3.13364	Fstl1	mmu-let-7c-5p	-1.47774	0.00234926	DOWN	UP	YES
17535951	Fundc2	FUN14 domain containing 2	0.685799	7.53303	3.79926	0.000879125	0.0280016	-0.726258	Fundc2	mmu-miR-181b-5p	-1.18269	0.0379446	DOWN	UP	YES
17492598	Furin	furin (paired basic amino acid cleaving enzyme)	0.575989	9.45929	3.19973	0.00385802	0.0702252	-2.11217	Furin	mmu-miR-23b-3p	-1.06605	0.0198663	DOWN	UP	YES
17309981	Fyb	FYN binding protein	0.926279	7.57165	4.38155	0.000202019	0.0104953	0.667123	Fyb	mmu-miR-23b-3p	-1.06605	0.0198663	DOWN	UP	YES
17337513	Gabbr1	gamma-aminobutyric acid (GABA) B receptor, 1	-0.630163	8.0309	-3.37941	0.0024911	0.0533098	-1.70455	Gabbr1	mmu-miR-133a-3p	0.967884	0.0235242	UP	DOWN	YES
17458771	Gars	glycyl-tRNA synthetase	0.606606	9.03338	3.425	0.00222739	0.049765	-1.59993	Gars	mmu-let-7b-5p	-0.818467	0.041336	DOWN	UP	YES
17458771	Gars	glycyl-tRNA synthetase	0.606606	9.03338	3.425	0.00222739	0.049765	-1.59993	Gars	mmu-let-7c-5p	-1.47774	0.00234926	DOWN	UP	YES
17458771	Gars	glycyl-tRNA synthetase	0.606606	9.03338	3.425	0.00222739	0.049765	-1.59993	Gars	mmu-miR-181b-5p	-1.18269	0.0379446	DOWN	UP	YES
17390810	Gatm	glycine amidinotransferase (L-arginine:glycine amidinotransferase)	1.34	5.89576	5.69657	7.34236e-06	0.00116528	3.82648	Gatm	mmu-let-7b-5p	-0.818467	0.041336	DOWN	UP	YES
17390810	Gatm	glycine amidinotransferase (L-arginine:glycine amidinotransferase)	1.34	5.89576	5.69657	7.34236e-06	0.00116528	3.82648	Gatm	mmu-let-7c-5p	-1.47774	0.00234926	DOWN	UP	YES
17305748	Gch1	GTP cyclohydrolase 1	0.510751	6.67534	2.90137	0.00785773	0.108112	-2.76943	Gch1	mmu-let-7c-5p	-1.47774	0.00234926	DOWN	UP	YES
17305748	Gch1	GTP cyclohydrolase 1	0.510751	6.67534	2.90137	0.00785773	0.108112	-2.76943	Gch1	mmu-miR-181b-5p	-1.18269	0.0379446	DOWN	UP	YES
17233347	Gja1	gap junction protein, alpha 1	0.724184	8.23619	3.09174	0.00500278	0.0820467	-2.35314	Gja1	mmu-miR-23b-3p	-1.06605	0.0198663	DOWN	UP	YES
17233347	Gja1	gap junction protein, alpha 1	0.724184	8.23619	3.09174	0.00500278	0.0820467	-2.35314	Gja1	mmu-miR-29b-3p	-0.802632	0.0418224	DOWN	UP	YES
17233347	Gja1	gap junction protein, alpha 1	0.724184	8.23619	3.09174	0.00500278	0.0820467	-2.35314	Gja1	mmu-miR-30d-5p	-0.962649	0.00493363	DOWN	UP	YES
17430211	Gja4	gap junction protein, alpha 4	0.53328	7.9352	2.28248	0.0316618	0.237664	-4.02698	Gja4	mmu-miR-29b-3p	-0.802632	0.0418224	DOWN	UP	YES
17544517	Gla	galactosidase, alpha	0.975342	7.30586	6.64493	7.30796e-07	0.000240297	6.02028	Gla	mmu-let-7b-5p	-0.818467	0.041336	DOWN	UP	YES
17544517	Gla	galactosidase, alpha	0.975342	7.30586	6.64493	7.30796e-07	0.000240297	6.02028	Gla	mmu-let-7c-5p	-1.47774	0.00234926	DOWN	UP	YES
17544517	Gla	galactosidase, alpha	0.975342	7.30586	6.64493	7.30796e-07	0.000240297	6.02028	Gla	mmu-miR-3064-5p	-0.505052	0.0268297	DOWN	UP	YES
17456001	Glcci1	glucocorticoid induced transcript 1	-0.56613	7.43156	-3.64956	0.00127777	0.0355276	-1.07855	Glcci1	mmu-miR-133a-3p	0.967884	0.0235242	UP	DOWN	YES
17244949	Glipr1	GLI pathogenesis-related 1 (glioma)	0.98329	8.23246	3.75599	0.000979713	0.0299602	-0.828423	Glipr1	mmu-let-7b-5p	-0.818467	0.041336	DOWN	UP	YES
17413500	Glipr2	GLI pathogenesis-related 2	0.903342	7.19113	6.10076	2.71451e-06	0.000571628	4.77409	Glipr2	mmu-miR-30d-5p	-0.962649	0.00493363	DOWN	UP	YES
17288716	Glrx	glutaredoxin	1.11335	8.71902	3.82191	0.000830607	0.0269745	-0.672686	Glrx	mmu-let-7b-5p	-0.818467	0.041336	DOWN	UP	YES
17288716	Glrx	glutaredoxin	1.11335	8.71902	3.82191	0.000830607	0.0269745	-0.672686	Glrx	mmu-let-7c-5p	-1.47774	0.00234926	DOWN	UP	YES
17236339	Gnptab	N-acetylglucosamine-1-phosphate transferase, alpha and beta subunits	0.628106	8.39254	3.71481	0.00108593	0.0319711	-0.925419	Gnptab	mmu-let-7b-5p	-0.818467	0.041336	DOWN	UP	YES
17236339	Gnptab	N-acetylglucosamine-1-phosphate transferase, alpha and beta subunits	0.628106	8.39254	3.71481	0.00108593	0.0319711	-0.925419	Gnptab	mmu-let-7c-5p	-1.47774	0.00234926	DOWN	UP	YES
17237715	Gns	glucosamine (N-acetyl)-6-sulfatase	0.569591	10.4175	3.38485	0.00245808	0.0528201	-1.69208	Gns	mmu-let-7b-5p	-0.818467	0.041336	DOWN	UP	YES
17237715	Gns	glucosamine (N-acetyl)-6-sulfatase	0.569591	10.4175	3.38485	0.00245808	0.0528201	-1.69208	Gns	mmu-let-7c-5p	-1.47774	0.00234926	DOWN	UP	YES
17237715	Gns	glucosamine (N-acetyl)-6-sulfatase	0.569591	10.4175	3.38485	0.00245808	0.0528201	-1.69208	Gns	mmu-miR-200b-3p	-1.17057	0.00169277	DOWN	UP	YES
17458439	Gpnmb	glycoprotein (transmembrane) nmb	3.26928	9.08265	12.5569	5.19689e-12	7.16219e-08	16.822	Gpnmb	mmu-let-7c-5p	-1.47774	0.00234926	DOWN	UP	YES
17309649	Gpr183	G protein-coupled receptor 183	0.567568	6.70965	3.22783	0.00360436	0.0672787	-2.04895	Gpr183	mmu-miR-1192	-0.92619	0.007197	DOWN	UP	YES
17256959	Grn	granulin	0.88006	10.8441	3.75496	0.000982244	0.0300154	-0.830856	Grn	mmu-miR-103-3p	-0.833679	0.0367714	DOWN	UP	YES
17256959	Grn	granulin	0.88006	10.8441	3.75496	0.000982244	0.0300154	-0.830856	Grn	mmu-miR-29b-3p	-0.802632	0.0418224	DOWN	UP	YES
17370209	Gsn	gelsolin	-1.03417	11.296	-6.62871	7.59573e-07	0.000241573	5.98368	Gsn	mmu-miR-133a-3p	0.967884	0.0235242	UP	DOWN	YES
17313895	Gtse1	G two S phase expressed protein 1	1.02766	6.29165	5.15437	2.85118e-05	0.00288294	2.53269	Gtse1	mmu-miR-30d-5p	-0.962649	0.00493363	DOWN	UP	YES
17453160	Gusb	glucuronidase, beta	1.1601	8.63095	6.8369	4.63833e-07	0.00018264	6.45078	Gusb	mmu-let-7b-5p	-0.818467	0.041336	DOWN	UP	YES
17453160	Gusb	glucuronidase, beta	1.1601	8.63095	6.8369	4.63833e-07	0.00018264	6.45078	Gusb	mmu-let-7c-5p	-1.47774	0.00234926	DOWN	UP	YES
17285703	H2ac11	H2A clustered histone 11	0.636405	9.26535	3.18132	0.00403349	0.0717885	-2.15348	H2ac11	mmu-miR-30d-5p	-0.962649	0.00493363	DOWN	UP	YES
17291023	H2ac11	H2A clustered histone 11	0.636405	9.26535	3.18132	0.00403349	0.0717885	-2.15348	H2ac11	mmu-miR-30d-5p	-0.962649	0.00493363	DOWN	UP	YES
17291057	H2ac11	H2A clustered histone 11	0.854886	3.91036	3.3767	0.00250766	0.0535458	-1.71074	H2ac11	mmu-miR-30d-5p	-0.962649	0.00493363	DOWN	UP	YES
17285703	H2ac4	H2A clustered histone 4	0.636405	9.26535	3.18132	0.00403349	0.0717885	-2.15348	H2ac4	mmu-miR-30d-5p	-0.962649	0.00493363	DOWN	UP	YES
17285867	H2ac4	H2A clustered histone 4	1.81822	6.75428	3.68545	0.00116847	0.0336893	-0.994405	H2ac4	mmu-miR-30d-5p	-0.962649	0.00493363	DOWN	UP	YES
17291023	H2ac4	H2A clustered histone 4	0.636405	9.26535	3.18132	0.00403349	0.0717885	-2.15348	H2ac4	mmu-miR-30d-5p	-0.962649	0.00493363	DOWN	UP	YES
17285691	H2bc11	H2B clustered histone 11	1.24963	9.74955	5.15427	2.85191e-05	0.00288294	2.53244	H2bc11	mmu-miR-29b-3p	-0.802632	0.0418224	DOWN	UP	YES
17285691	H2bc11	H2B clustered histone 11	1.24963	9.74955	5.15427	2.85191e-05	0.00288294	2.53244	H2bc11	mmu-miR-29c-3p	-0.802632	0.0418224	DOWN	UP	YES
17285691	H2bc3	H2B clustered histone 3	1.24963	9.74955	5.15427	2.85191e-05	0.00288294	2.53244	H2bc3	mmu-miR-29b-3p	-0.802632	0.0418224	DOWN	UP	YES
17285691	H2bc3	H2B clustered histone 3	1.24963	9.74955	5.15427	2.85191e-05	0.00288294	2.53244	H2bc3	mmu-miR-29c-3p	-0.802632	0.0418224	DOWN	UP	YES
17285863	H2bc3	H2B clustered histone 3	0.827747	6.89831	3.55022	0.00163529	0.0414029	-1.31036	H2bc3	mmu-miR-29b-3p	-0.802632	0.0418224	DOWN	UP	YES
17285863	H2bc3	H2B clustered histone 3	0.827747	6.89831	3.55022	0.00163529	0.0414029	-1.31036	H2bc3	mmu-miR-29c-3p	-0.802632	0.0418224	DOWN	UP	YES
17548561	H4f16	H4 histone 16	0.774298	7.07024	3.10232	0.00487762	0.0807306	-2.32969	H4f16	mmu-miR-30d-5p	-0.962649	0.00493363	DOWN	UP	YES
17317167	Has2	hyaluronan synthase 2	1.05636	6.25082	4.34617	0.000220992	0.0111835	0.581796	Has2	mmu-miR-297a-5p	-1.26548	0.0305066	DOWN	UP	YES
17317167	Has2	hyaluronan synthase 2	1.05636	6.25082	4.34617	0.000220992	0.0111835	0.581796	Has2	mmu-miR-29b-3p	-0.802632	0.0418224	DOWN	UP	YES
17353699	Hbegf	heparin-binding EGF-like growth factor	0.984455	8.07887	4.76042	7.72274e-05	0.00554334	1.58254	Hbegf	mmu-let-7c-5p	-1.47774	0.00234926	DOWN	UP	YES
17353699	Hbegf	heparin-binding EGF-like growth factor	0.984455	8.07887	4.76042	7.72274e-05	0.00554334	1.58254	Hbegf	mmu-miR-29b-3p	-0.802632	0.0418224	DOWN	UP	YES
17353699	Hbegf	heparin-binding EGF-like growth factor	0.984455	8.07887	4.76042	7.72274e-05	0.00554334	1.58254	Hbegf	mmu-miR-29c-3p	-0.802632	0.0418224	DOWN	UP	YES
17223080	Hecw2	HECT, C2 and WW domain containing E3 ubiquitin protein ligase 2	-0.88889	8.00371	-4.46697	0.000162643	0.00907514	0.87331	Hecw2	mmu-miR-133a-3p	0.967884	0.0235242	UP	DOWN	YES
17359212	Hells	helicase, lymphoid specific	0.80811	5.59315	3.71047	0.00109777	0.0321213	-0.935634	Hells	mmu-miR-181b-5p	-1.18269	0.0379446	DOWN	UP	YES
17276328	Hif1a	hypoxia inducible factor 1, alpha subunit	0.988749	8.4863	4.51388	0.000144384	0.00843155	0.986618	Hif1a	mmu-let-7b-5p	-0.818467	0.041336	DOWN	UP	YES
17276328	Hif1a	hypoxia inducible factor 1, alpha subunit	0.988749	8.4863	4.51388	0.000144384	0.00843155	0.986618	Hif1a	mmu-let-7c-5p	-1.47774	0.00234926	DOWN	UP	YES
17276328	Hif1a	hypoxia inducible factor 1, alpha subunit	0.988749	8.4863	4.51388	0.000144384	0.00843155	0.986618	Hif1a	mmu-miR-181b-5p	-1.18269	0.0379446	DOWN	UP	YES
17276328	Hif1a	hypoxia inducible factor 1, alpha subunit	0.988749	8.4863	4.51388	0.000144384	0.00843155	0.986618	Hif1a	mmu-miR-29b-3p	-0.802632	0.0418224	DOWN	UP	YES
17276328	Hif1a	hypoxia inducible factor 1, alpha subunit	0.988749	8.4863	4.51388	0.000144384	0.00843155	0.986618	Hif1a	mmu-miR-29c-3p	-0.802632	0.0418224	DOWN	UP	YES
17276328	Hif1a	hypoxia inducible factor 1, alpha subunit	0.988749	8.4863	4.51388	0.000144384	0.00843155	0.986618	Hif1a	mmu-miR-30d-5p	-0.962649	0.00493363	DOWN	UP	YES
17276328	Hif1a	hypoxia inducible factor 1, alpha subunit	0.988749	8.4863	4.51388	0.000144384	0.00843155	0.986618	Hif1a	mmu-miR-5101	-0.666545	0.00398603	DOWN	UP	YES
17285691	Hist1h2bq	histone cluster 1, H2bq	1.24963	9.74955	5.15427	2.85191e-05	0.00288294	2.53244	Hist1h2bq	mmu-miR-1192	-0.92619	0.007197	DOWN	UP	YES
17285691	Hist1h2br	histone cluster 1 H2br	1.24963	9.74955	5.15427	2.85191e-05	0.00288294	2.53244	Hist1h2br	mmu-miR-1192	-0.92619	0.007197	DOWN	UP	YES
17468018	Hk2	hexokinase 2	0.543454	7.34852	3.70619	0.00110956	0.0323518	-0.945695	Hk2	mmu-miR-181b-5p	-1.18269	0.0379446	DOWN	UP	YES
17468018	Hk2	hexokinase 2	0.543454	7.34852	3.70619	0.00110956	0.0323518	-0.945695	Hk2	mmu-miR-23b-3p	-1.06605	0.0198663	DOWN	UP	YES
17307709	Hmbox1	homeobox containing 1	-0.549316	8.57865	-4.22494	0.000300514	0.0137139	0.289849	Hmbox1	mmu-miR-133a-3p	0.967884	0.0235242	UP	DOWN	YES
17290173	Hmgcs1	3-hydroxy-3-methylglutaryl-Coenzyme A synthase 1	0.614772	9.15218	2.64256	0.0142911	0.152837	-3.31511	Hmgcs1	mmu-let-7b-5p	-0.818467	0.041336	DOWN	UP	YES
17290173	Hmgcs1	3-hydroxy-3-methylglutaryl-Coenzyme A synthase 1	0.614772	9.15218	2.64256	0.0142911	0.152837	-3.31511	Hmgcs1	mmu-let-7c-5p	-1.47774	0.00234926	DOWN	UP	YES
17290173	Hmgcs1	3-hydroxy-3-methylglutaryl-Coenzyme A synthase 1	0.614772	9.15218	2.64256	0.0142911	0.152837	-3.31511	Hmgcs1	mmu-miR-181b-5p	-1.18269	0.0379446	DOWN	UP	YES
17290173	Hmgcs1	3-hydroxy-3-methylglutaryl-Coenzyme A synthase 1	0.614772	9.15218	2.64256	0.0142911	0.152837	-3.31511	Hmgcs1	mmu-miR-200b-3p	-1.17057	0.00169277	DOWN	UP	YES
17290173	Hmgcs1	3-hydroxy-3-methylglutaryl-Coenzyme A synthase 1	0.614772	9.15218	2.64256	0.0142911	0.152837	-3.31511	Hmgcs1	mmu-miR-29b-3p	-0.802632	0.0418224	DOWN	UP	YES
17290173	Hmgcs1	3-hydroxy-3-methylglutaryl-Coenzyme A synthase 1	0.614772	9.15218	2.64256	0.0142911	0.152837	-3.31511	Hmgcs1	mmu-miR-29c-3p	-0.802632	0.0418224	DOWN	UP	YES
17290173	Hmgcs1	3-hydroxy-3-methylglutaryl-Coenzyme A synthase 1	0.614772	9.15218	2.64256	0.0142911	0.152837	-3.31511	Hmgcs1	mmu-miR-30d-5p	-0.962649	0.00493363	DOWN	UP	YES
17400862	Hmgcs2	3-hydroxy-3-methylglutaryl-Coenzyme A synthase 2	-1.02743	7.98876	-4.08592	0.00042721	0.0171545	-0.0438056	Hmgcs2	mmu-miR-692	0.6296	0.0221784	UP	DOWN	YES
17261840	Hmmr	hyaluronan mediated motility receptor (RHAMM)	0.725965	5.17166	3.08464	0.00508852	0.0827962	-2.36887	Hmmr	mmu-miR-181b-5p	-1.18269	0.0379446	DOWN	UP	YES
17261840	Hmmr	hyaluronan mediated motility receptor (RHAMM)	0.725965	5.17166	3.08464	0.00508852	0.0827962	-2.36887	Hmmr	mmu-miR-29b-3p	-0.802632	0.0418224	DOWN	UP	YES
17502573	Hmox1	heme oxygenase 1	1.65103	7.89885	6.5443	9.29113e-07	0.000264439	5.79264	Hmox1	mmu-let-7c-5p	-1.47774	0.00234926	DOWN	UP	YES
17502573	Hmox1	heme oxygenase 1	1.65103	7.89885	6.5443	9.29113e-07	0.000264439	5.79264	Hmox1	mmu-miR-30d-5p	-0.962649	0.00493363	DOWN	UP	YES
17547767	Hnrnpf	heterogeneous nuclear ribonucleoprotein F	0.51926	7.94511	2.57884	0.0165064	0.166439	-3.44538	Hnrnpf	mmu-miR-29b-3p	-0.802632	0.0418224	DOWN	UP	YES
17548525	Hnrnpf	heterogeneous nuclear ribonucleoprotein F	0.519043	8.24334	2.74499	0.0113052	0.13416	-3.10218	Hnrnpf	mmu-miR-29b-3p	-0.802632	0.0418224	DOWN	UP	YES
17421170	Hnrnph2	heterogeneous nuclear ribonucleoprotein H2	0.605408	5.77634	1.86647	0.0742994	0.376038	-4.7642	Hnrnph2	mmu-let-7b-5p	-0.818467	0.041336	DOWN	UP	YES
17421170	Hnrnph2	heterogeneous nuclear ribonucleoprotein H2	0.605408	5.77634	1.86647	0.0742994	0.376038	-4.7642	Hnrnph2	mmu-let-7c-5p	-1.47774	0.00234926	DOWN	UP	YES
17229466	Hsd17b7	hydroxysteroid (17-beta) dehydrogenase 7	0.700909	6.96401	2.97354	0.00662846	0.0976972	-2.61296	Hsd17b7	mmu-miR-181b-5p	-1.18269	0.0379446	DOWN	UP	YES
17229466	Hsd17b7	hydroxysteroid (17-beta) dehydrogenase 7	0.700909	6.96401	2.97354	0.00662846	0.0976972	-2.61296	Hsd17b7	mmu-miR-29b-3p	-0.802632	0.0418224	DOWN	UP	YES
17229466	Hsd17b7	hydroxysteroid (17-beta) dehydrogenase 7	0.700909	6.96401	2.97354	0.00662846	0.0976972	-2.61296	Hsd17b7	mmu-miR-29c-3p	-0.802632	0.0418224	DOWN	UP	YES
17331533	Hspa13	heat shock protein 70 family, member 13	0.579875	6.84979	2.08104	0.048324	0.298514	-4.39662	Hspa13	mmu-miR-1192	-0.92619	0.007197	DOWN	UP	YES
17225138	Htr2b	5-hydroxytryptamine (serotonin) receptor 2B	0.788224	6.01711	4.06489	0.000450529	0.017825	-0.0941645	Htr2b	mmu-let-7b-5p	-0.818467	0.041336	DOWN	UP	YES
17213490	Icos	inducible T cell co-stimulator	0.728797	7.02187	3.92385	0.00064294	0.0226354	-0.430751	Icos	mmu-miR-29b-3p	-0.802632	0.0418224	DOWN	UP	YES
17213490	Icos	inducible T cell co-stimulator	0.728797	7.02187	3.92385	0.00064294	0.0226354	-0.430751	Icos	mmu-miR-29c-3p	-0.802632	0.0418224	DOWN	UP	YES
17280310	Id2	inhibitor of DNA binding 2	0.764618	9.16591	2.95626	0.00690483	0.0996789	-2.65058	Id2	mmu-miR-181b-5p	-1.18269	0.0379446	DOWN	UP	YES
17337228	Ier3	immediate early response 3	0.598214	9.68089	3.7539	0.000984849	0.0300728	-0.833352	Ier3	mmu-let-7c-5p	-1.47774	0.00234926	DOWN	UP	YES
17230034	Ifi207	interferon activated gene 207	1.49418	6.76392	6.09899	2.72628e-06	0.000571628	4.76997	Ifi207	mmu-let-7b-5p	-0.818467	0.041336	DOWN	UP	YES
17510136	Ifi30	interferon gamma inducible protein 30	1.18891	9.95387	5.27121	2.12471e-05	0.00236326	2.81322	Ifi30	mmu-miR-23b-3p	-1.06605	0.0198663	DOWN	UP	YES
17510136	Ifi30	interferon gamma inducible protein 30	1.18891	9.95387	5.27121	2.12471e-05	0.00236326	2.81322	Ifi30	mmu-miR-29b-3p	-0.802632	0.0418224	DOWN	UP	YES
17510136	Ifi30	interferon gamma inducible protein 30	1.18891	9.95387	5.27121	2.12471e-05	0.00236326	2.81322	Ifi30	mmu-miR-29c-3p	-0.802632	0.0418224	DOWN	UP	YES
17327084	Ifngr2	interferon gamma receptor 2	0.593558	9.37099	3.66531	0.00122864	0.0347034	-1.04166	Ifngr2	mmu-miR-23b-3p	-1.06605	0.0198663	DOWN	UP	YES
17327084	Ifngr2	interferon gamma receptor 2	0.593558	9.37099	3.66531	0.00122864	0.0347034	-1.04166	Ifngr2	mmu-miR-29b-3p	-0.802632	0.0418224	DOWN	UP	YES
17327084	Ifngr2	interferon gamma receptor 2	0.593558	9.37099	3.66531	0.00122864	0.0347034	-1.04166	Ifngr2	mmu-miR-29c-3p	-0.802632	0.0418224	DOWN	UP	YES
17327084	Ifngr2	interferon gamma receptor 2	0.593558	9.37099	3.66531	0.00122864	0.0347034	-1.04166	Ifngr2	mmu-miR-3064-5p	-0.505052	0.0268297	DOWN	UP	YES
17327084	Ifngr2	interferon gamma receptor 2	0.593558	9.37099	3.66531	0.00122864	0.0347034	-1.04166	Ifngr2	mmu-miR-30d-5p	-0.962649	0.00493363	DOWN	UP	YES
17236288	Igf1	insulin-like growth factor 1	0.950549	7.72207	3.99727	0.000534368	0.019904	-0.255774	Igf1	mmu-let-7b-5p	-0.818467	0.041336	DOWN	UP	YES
17236288	Igf1	insulin-like growth factor 1	0.950549	7.72207	3.99727	0.000534368	0.019904	-0.255774	Igf1	mmu-let-7c-5p	-1.47774	0.00234926	DOWN	UP	YES
17236288	Igf1	insulin-like growth factor 1	0.950549	7.72207	3.99727	0.000534368	0.019904	-0.255774	Igf1	mmu-miR-200b-3p	-1.17057	0.00169277	DOWN	UP	YES
17236288	Igf1	insulin-like growth factor 1	0.950549	7.72207	3.99727	0.000534368	0.019904	-0.255774	Igf1	mmu-miR-23b-3p	-1.06605	0.0198663	DOWN	UP	YES
17236288	Igf1	insulin-like growth factor 1	0.950549	7.72207	3.99727	0.000534368	0.019904	-0.255774	Igf1	mmu-miR-29b-3p	-0.802632	0.0418224	DOWN	UP	YES
17236288	Igf1	insulin-like growth factor 1	0.950549	7.72207	3.99727	0.000534368	0.019904	-0.255774	Igf1	mmu-miR-30d-5p	-0.962649	0.00493363	DOWN	UP	YES
17479099	Igf1r	insulin-like growth factor I receptor	-0.544593	8.97362	-3.14348	0.00441855	0.0756988	-2.23809	Igf1r	mmu-miR-133a-3p	0.967884	0.0235242	UP	DOWN	YES
17495839	Igsf6	immunoglobulin superfamily, member 6	1.51994	9.11515	4.51393	0.000144365	0.00843155	0.986742	Igsf6	mmu-miR-3064-5p	-0.505052	0.0268297	DOWN	UP	YES
17247336	Ikzf1	IKAROS family zinc finger 1	0.517235	7.12847	2.69447	0.0126957	0.143347	-3.20772	Ikzf1	mmu-miR-181b-5p	-1.18269	0.0379446	DOWN	UP	YES
17247336	Ikzf1	IKAROS family zinc finger 1	0.517235	7.12847	2.69447	0.0126957	0.143347	-3.20772	Ikzf1	mmu-miR-23b-3p	-1.06605	0.0198663	DOWN	UP	YES
17247336	Ikzf1	IKAROS family zinc finger 1	0.517235	7.12847	2.69447	0.0126957	0.143347	-3.20772	Ikzf1	mmu-miR-29b-3p	-0.802632	0.0418224	DOWN	UP	YES
17247336	Ikzf1	IKAROS family zinc finger 1	0.517235	7.12847	2.69447	0.0126957	0.143347	-3.20772	Ikzf1	mmu-miR-29c-3p	-0.802632	0.0418224	DOWN	UP	YES
17247336	Ikzf1	IKAROS family zinc finger 1	0.517235	7.12847	2.69447	0.0126957	0.143347	-3.20772	Ikzf1	mmu-miR-30d-5p	-0.962649	0.00493363	DOWN	UP	YES
17212252	Il18rap	interleukin 18 receptor accessory protein	0.684428	6.81056	3.59151	0.00147615	0.038701	-1.21422	Il18rap	mmu-let-7b-5p	-0.818467	0.041336	DOWN	UP	YES
17391554	Il1a	interleukin 1 alpha	0.828825	6.20154	2.67966	0.0131331	0.146004	-3.23848	Il1a	mmu-let-7b-5p	-0.818467	0.041336	DOWN	UP	YES
17391554	Il1a	interleukin 1 alpha	0.828825	6.20154	2.67966	0.0131331	0.146004	-3.23848	Il1a	mmu-let-7c-5p	-1.47774	0.00234926	DOWN	UP	YES
17212185	Il1r1	interleukin 1 receptor, type I	0.541164	8.56781	2.3013	0.0304088	0.231966	-3.99133	Il1r1	mmu-miR-29b-3p	-0.802632	0.0418224	DOWN	UP	YES
17367686	Il1rn	interleukin 1 receptor antagonist	1.4302	6.1836	7.37977	1.31493e-07	8.55351e-05	7.64031	Il1rn	mmu-let-7b-5p	-0.818467	0.041336	DOWN	UP	YES
17482958	Il21r	interleukin 21 receptor	0.862511	6.34077	4.90107	5.40722e-05	0.00446819	1.92231	Il21r	mmu-miR-23b-3p	-1.06605	0.0198663	DOWN	UP	YES
17482958	Il21r	interleukin 21 receptor	0.862511	6.34077	4.90107	5.40722e-05	0.00446819	1.92231	Il21r	mmu-miR-30d-5p	-0.962649	0.00493363	DOWN	UP	YES
17366992	Il2ra	interleukin 2 receptor, alpha chain	0.948697	6.74972	6.64206	7.35815e-07	0.000240297	6.0138	Il2ra	mmu-miR-29b-3p	-0.802632	0.0418224	DOWN	UP	YES
17366992	Il2ra	interleukin 2 receptor, alpha chain	0.948697	6.74972	6.64206	7.35815e-07	0.000240297	6.0138	Il2ra	mmu-miR-29c-3p	-0.802632	0.0418224	DOWN	UP	YES
17366992	Il2ra	interleukin 2 receptor, alpha chain	0.948697	6.74972	6.64206	7.35815e-07	0.000240297	6.0138	Il2ra	mmu-miR-30d-5p	-0.962649	0.00493363	DOWN	UP	YES
17358598	Il33	interleukin 33	1.00131	9.22181	2.35018	0.0273642	0.219727	-3.89789	Il33	mmu-let-7b-5p	-0.818467	0.041336	DOWN	UP	YES
17435725	Il6	interleukin 6	1.07406	3.81603	5.56542	1.01733e-05	0.00143902	3.5156	Il6	mmu-miR-181b-5p	-1.18269	0.0379446	DOWN	UP	YES
17434023	Isg15	ISG15 ubiquitin-like modifier	1.31438	6.71263	4.91245	5.25364e-05	0.004397	1.94978	Isg15	mmu-miR-23b-3p	-1.06605	0.0198663	DOWN	UP	YES
17372515	Itgav	integrin alpha V	0.53618	8.87989	2.46327	0.0213618	0.191542	-3.67714	Itgav	mmu-let-7b-5p	-0.818467	0.041336	DOWN	UP	YES
17234647	Itgb2	integrin beta 2	1.24767	9.57402	7.03257	2.93195e-07	0.00013088	6.88437	Itgb2	mmu-let-7b-5p	-0.818467	0.041336	DOWN	UP	YES
17234647	Itgb2	integrin beta 2	1.24767	9.57402	7.03257	2.93195e-07	0.00013088	6.88437	Itgb2	mmu-let-7c-5p	-1.47774	0.00234926	DOWN	UP	YES
17234647	Itgb2	integrin beta 2	1.24767	9.57402	7.03257	2.93195e-07	0.00013088	6.88437	Itgb2	mmu-miR-23b-3p	-1.06605	0.0198663	DOWN	UP	YES
17511259	Junb	jun B proto-oncogene	0.856321	8.1253	5.0485	3.72426e-05	0.0034837	2.27788	Junb	mmu-miR-30d-5p	-0.962649	0.00493363	DOWN	UP	YES
17399485	Kcnn3	potassium intermediate/small conductance calcium-activated channel, subfamily N, member 3	0.524635	7.31778	2.51081	0.0192228	0.181105	-3.58253	Kcnn3	mmu-miR-29b-3p	-0.802632	0.0418224	DOWN	UP	YES
17480324	Kctd21	potassium channel tetramerisation domain containing 21	-0.564252	6.66737	-3.50831	0.00181394	0.0439609	-1.40762	Kctd21	mmu-miR-133a-3p	0.967884	0.0235242	UP	DOWN	YES
17359020	Kif11	kinesin family member 11	1.01795	6.46473	3.6034	0.0014332	0.0380484	-1.18648	Kif11	mmu-miR-29b-3p	-0.802632	0.0418224	DOWN	UP	YES
17359020	Kif11	kinesin family member 11	1.01795	6.46473	3.6034	0.0014332	0.0380484	-1.18648	Kif11	mmu-miR-29c-3p	-0.802632	0.0418224	DOWN	UP	YES
17359020	Kif11	kinesin family member 11	1.01795	6.46473	3.6034	0.0014332	0.0380484	-1.18648	Kif11	mmu-miR-5101	-0.666545	0.00398603	DOWN	UP	YES
17217789	Kif14	kinesin family member 14	0.529703	5.33331	2.39534	0.0248019	0.208295	-3.81048	Kif14	mmu-let-7c-5p	-1.47774	0.00234926	DOWN	UP	YES
17225630	Kif1a	kinesin family member 1A	0.531251	6.72616	3.14255	0.00442849	0.0757848	-2.24018	Kif1a	mmu-let-7b-5p	-0.818467	0.041336	DOWN	UP	YES
17225630	Kif1a	kinesin family member 1A	0.531251	6.72616	3.14255	0.00442849	0.0757848	-2.24018	Kif1a	mmu-let-7c-5p	-1.47774	0.00234926	DOWN	UP	YES
17225630	Kif1a	kinesin family member 1A	0.531251	6.72616	3.14255	0.00442849	0.0757848	-2.24018	Kif1a	mmu-miR-181b-5p	-1.18269	0.0379446	DOWN	UP	YES
17225630	Kif1a	kinesin family member 1A	0.531251	6.72616	3.14255	0.00442849	0.0757848	-2.24018	Kif1a	mmu-miR-23b-3p	-1.06605	0.0198663	DOWN	UP	YES
17225630	Kif1a	kinesin family member 1A	0.531251	6.72616	3.14255	0.00442849	0.0757848	-2.24018	Kif1a	mmu-miR-30d-5p	-0.962649	0.00493363	DOWN	UP	YES
17358838	Kif20b	kinesin family member 20B	0.98161	5.89585	4.10591	0.000406164	0.0165447	0.00407439	Kif20b	mmu-miR-29b-3p	-0.802632	0.0418224	DOWN	UP	YES
17496568	Kif22	kinesin family member 22	0.655718	5.85324	4.21719	0.000306467	0.0138783	0.271232	Kif22	mmu-miR-29b-3p	-0.802632	0.0418224	DOWN	UP	YES
17496568	Kif22	kinesin family member 22	0.655718	5.85324	4.21719	0.000306467	0.0138783	0.271232	Kif22	mmu-miR-29c-3p	-0.802632	0.0418224	DOWN	UP	YES
17527934	Kif23	kinesin family member 23	0.829598	6.35836	4.09951	0.00041279	0.0166994	-0.011263	Kif23	mmu-miR-5101	-0.666545	0.00398603	DOWN	UP	YES
17236900	Kitl	kit ligand	-0.724504	9.1002	-4.30961	0.000242467	0.0119343	0.493673	Kitl	mmu-miR-133a-3p	0.967884	0.0235242	UP	DOWN	YES
17217174	Klhdc8a	kelch domain containing 8A	0.623523	6.99365	2.84525	0.00896049	0.116942	-2.88985	Klhdc8a	mmu-miR-297a-5p	-1.26548	0.0305066	DOWN	UP	YES
17526382	Kmt2a	lysine (K)-specific methyltransferase 2A	-0.50944	9.24016	-3.23113	0.00357566	0.0669849	-2.04151	Kmt2a	mmu-miR-133a-3p	0.967884	0.0235242	UP	DOWN	YES
17435189	Kmt2e	lysine (K)-specific methyltransferase 2E	-0.598272	10.1311	-3.38148	0.00247849	0.0531224	-1.69981	Kmt2e	mmu-miR-133a-3p	0.967884	0.0235242	UP	DOWN	YES
17459463	Krcc1	lysine-rich coiled-coil 1	0.574703	7.71996	2.27919	0.0318855	0.238451	-4.0332	Krcc1	mmu-miR-181b-5p	-1.18269	0.0379446	DOWN	UP	YES
17339223	Lama1	laminin, alpha 1	1.0881	6.12401	5.45711	1.33317e-05	0.00169079	3.25777	Lama1	mmu-let-7b-5p	-0.818467	0.041336	DOWN	UP	YES
17339223	Lama1	laminin, alpha 1	1.0881	6.12401	5.45711	1.33317e-05	0.00169079	3.25777	Lama1	mmu-let-7c-5p	-1.47774	0.00234926	DOWN	UP	YES
17437247	Lap3	leucine aminopeptidase 3	0.61437	8.49456	2.29154	0.031053	0.2348	-4.00985	Lap3	mmu-let-7b-5p	-0.818467	0.041336	DOWN	UP	YES
17437247	Lap3	leucine aminopeptidase 3	0.61437	8.49456	2.29154	0.031053	0.2348	-4.00985	Lap3	mmu-let-7c-5p	-1.47774	0.00234926	DOWN	UP	YES
17307184	Lats2	large tumor suppressor 2	-0.510472	8.0304	-2.60362	0.0156094	0.161101	-3.39493	Lats2	mmu-miR-133a-3p	0.967884	0.0235242	UP	DOWN	YES
17248380	Lcp2	lymphocyte cytosolic protein 2	0.738868	9.09894	4.79394	7.09344e-05	0.00528921	1.66355	Lcp2	mmu-miR-30d-5p	-0.962649	0.00493363	DOWN	UP	YES
17299329	Lgals3	lectin, galactose binding, soluble 3	1.39995	7.72669	7.984	3.38234e-08	4.86491e-05	8.91339	Lgals3	mmu-let-7c-5p	-1.47774	0.00234926	DOWN	UP	YES
17272785	Lgals3bp	lectin, galactoside-binding, soluble, 3 binding protein	0.947347	10.2225	3.35754	0.00262813	0.0551294	-1.75457	Lgals3bp	mmu-let-7b-5p	-0.818467	0.041336	DOWN	UP	YES
17272785	Lgals3bp	lectin, galactoside-binding, soluble, 3 binding protein	0.947347	10.2225	3.35754	0.00262813	0.0551294	-1.75457	Lgals3bp	mmu-let-7c-5p	-1.47774	0.00234926	DOWN	UP	YES
17246810	Lif	leukemia inhibitory factor	0.655839	6.27578	4.12542	0.00038661	0.0160325	0.0508511	Lif	mmu-miR-181b-5p	-1.18269	0.0379446	DOWN	UP	YES
17246810	Lif	leukemia inhibitory factor	0.655839	6.27578	4.12542	0.00038661	0.0160325	0.0508511	Lif	mmu-miR-29b-3p	-0.802632	0.0418224	DOWN	UP	YES
17246810	Lif	leukemia inhibitory factor	0.655839	6.27578	4.12542	0.00038661	0.0160325	0.0508511	Lif	mmu-miR-29c-3p	-0.802632	0.0418224	DOWN	UP	YES
17364114	Lipa	lysosomal acid lipase A	1.34917	9.87339	3.55098	0.00163223	0.0413872	-1.3086	Lipa	mmu-miR-30d-5p	-0.962649	0.00493363	DOWN	UP	YES
17358749	Lipn	lipase, family member N	0.525231	4.4177	2.31976	0.0292246	0.227165	-3.95619	Lipn	mmu-miR-23b-3p	-1.06605	0.0198663	DOWN	UP	YES
17328124	Litaf	LPS-induced TN factor	0.784399	7.64512	7.61853	7.64508e-08	6.22195e-05	8.1499	Litaf	mmu-let-7c-5p	-1.47774	0.00234926	DOWN	UP	YES
17350740	Lmnb1	lamin B1	0.710911	7.3309	4.10204	0.000410152	0.0166579	-0.00518661	Lmnb1	mmu-let-7b-5p	-0.818467	0.041336	DOWN	UP	YES
17350740	Lmnb1	lamin B1	0.710911	7.3309	4.10204	0.000410152	0.0166579	-0.00518661	Lmnb1	mmu-let-7c-5p	-1.47774	0.00234926	DOWN	UP	YES
17350740	Lmnb1	lamin B1	0.710911	7.3309	4.10204	0.000410152	0.0166579	-0.00518661	Lmnb1	mmu-miR-23b-3p	-1.06605	0.0198663	DOWN	UP	YES
17350740	Lmnb1	lamin B1	0.710911	7.3309	4.10204	0.000410152	0.0166579	-0.00518661	Lmnb1	mmu-miR-297a-5p	-1.26548	0.0305066	DOWN	UP	YES
17350740	Lmnb1	lamin B1	0.710911	7.3309	4.10204	0.000410152	0.0166579	-0.00518661	Lmnb1	mmu-miR-29b-3p	-0.802632	0.0418224	DOWN	UP	YES
17350740	Lmnb1	lamin B1	0.710911	7.3309	4.10204	0.000410152	0.0166579	-0.00518661	Lmnb1	mmu-miR-29c-3p	-0.802632	0.0418224	DOWN	UP	YES
17354367	Lox	lysyl oxidase	1.47963	9.00514	3.41725	0.00227022	0.0504481	-1.61775	Lox	mmu-miR-29b-3p	-0.802632	0.0418224	DOWN	UP	YES
17301634	Loxl2	lysyl oxidase-like 2	0.722114	7.8349	3.00338	0.00617593	0.0936412	-2.54779	Loxl2	mmu-miR-29b-3p	-0.802632	0.0418224	DOWN	UP	YES
17301634	Loxl2	lysyl oxidase-like 2	0.722114	7.8349	3.00338	0.00617593	0.0936412	-2.54779	Loxl2	mmu-miR-674-5p	-0.546437	0.0466459	DOWN	UP	YES
17501633	Lpl	lipoprotein lipase	1.23466	9.81991	6.45152	1.16057e-06	0.000294664	5.58158	Lpl	mmu-miR-29b-3p	-0.802632	0.0418224	DOWN	UP	YES
17316754	Lrp12	low density lipoprotein-related protein 12	1.40037	7.19377	6.99676	3.18752e-07	0.000135864	6.80543	Lrp12	mmu-miR-23b-3p	-1.06605	0.0198663	DOWN	UP	YES
17255232	Lrrc59	leucine rich repeat containing 59	0.533952	8.92342	2.81776	0.00955297	0.12112	-2.94845	Lrrc59	mmu-miR-29b-3p	-0.802632	0.0418224	DOWN	UP	YES
17255232	Lrrc59	leucine rich repeat containing 59	0.533952	8.92342	2.81776	0.00955297	0.12112	-2.94845	Lrrc59	mmu-miR-29c-3p	-0.802632	0.0418224	DOWN	UP	YES
17211286	Ly96	lymphocyte antigen 96	0.587454	8.48318	0.919463	0.367046	0.754304	-5.98912	Ly96	mmu-let-7b-5p	-0.818467	0.041336	DOWN	UP	YES
17210855	Lypla1	lysophospholipase 1	0.509532	8.25821	2.11323	0.0452195	0.287542	-4.33907	Lypla1	mmu-miR-29b-3p	-0.802632	0.0418224	DOWN	UP	YES
17210855	Lypla1	lysophospholipase 1	0.509532	8.25821	2.11323	0.0452195	0.287542	-4.33907	Lypla1	mmu-miR-3064-5p	-0.505052	0.0268297	DOWN	UP	YES
17210855	Lypla1	lysophospholipase 1	0.509532	8.25821	2.11323	0.0452195	0.287542	-4.33907	Lypla1	mmu-miR-5101	-0.666545	0.00398603	DOWN	UP	YES
17393868	Mafb	v-maf musculoaponeurotic fibrosarcoma oncogene family, protein B (avian)	1.39427	7.55423	6.66528	6.9626e-07	0.000235958	6.06616	Mafb	mmu-miR-200b-3p	-1.17057	0.00169277	DOWN	UP	YES
17351330	Malt1	MALT1 paracaspase	0.659605	8.6359	4.22794	0.000298237	0.0136434	0.29707	Malt1	mmu-miR-181b-5p	-1.18269	0.0379446	DOWN	UP	YES
17405154	Maml3	mastermind like transcriptional coactivator 3	-0.904058	8.15875	-4.71737	8.6137e-05	0.00594547	1.4785	Maml3	mmu-miR-133a-3p	0.967884	0.0235242	UP	DOWN	YES
17213770	Map2	microtubule-associated protein 2	0.610134	6.96218	4.22571	0.000299925	0.0137021	0.291712	Map2	mmu-let-7b-5p	-0.818467	0.041336	DOWN	UP	YES
17213770	Map2	microtubule-associated protein 2	0.610134	6.96218	4.22571	0.000299925	0.0137021	0.291712	Map2	mmu-let-7c-5p	-1.47774	0.00234926	DOWN	UP	YES
17213770	Map2	microtubule-associated protein 2	0.610134	6.96218	4.22571	0.000299925	0.0137021	0.291712	Map2	mmu-miR-181b-5p	-1.18269	0.0379446	DOWN	UP	YES
17213770	Map2	microtubule-associated protein 2	0.610134	6.96218	4.22571	0.000299925	0.0137021	0.291712	Map2	mmu-miR-200b-3p	-1.17057	0.00169277	DOWN	UP	YES
17382169	Mastl	microtubule associated serine/threonine kinase-like	0.856548	4.53121	3.12343	0.00463672	0.0779381	-2.28277	Mastl	mmu-miR-23b-3p	-1.06605	0.0198663	DOWN	UP	YES
17286254	Mboat1	membrane bound O-acyltransferase domain containing 1	0.690134	7.57415	4.36591	0.000210198	0.0108092	0.629395	Mboat1	mmu-let-7b-5p	-0.818467	0.041336	DOWN	UP	YES
17286254	Mboat1	membrane bound O-acyltransferase domain containing 1	0.690134	7.57415	4.36591	0.000210198	0.0108092	0.629395	Mboat1	mmu-miR-181b-5p	-1.18269	0.0379446	DOWN	UP	YES
17286254	Mboat1	membrane bound O-acyltransferase domain containing 1	0.690134	7.57415	4.36591	0.000210198	0.0108092	0.629395	Mboat1	mmu-miR-30d-5p	-0.962649	0.00493363	DOWN	UP	YES
17328432	Mcm4	minichromosome maintenance complex component 4	0.564441	7.19001	2.96342	0.00678901	0.0990444	-2.63501	Mcm4	mmu-miR-23b-3p	-1.06605	0.0198663	DOWN	UP	YES
17328432	Mcm4	minichromosome maintenance complex component 4	0.564441	7.19001	2.96342	0.00678901	0.0990444	-2.63501	Mcm4	mmu-miR-30d-5p	-0.962649	0.00493363	DOWN	UP	YES
17226550	Mcm6	minichromosome maintenance complex component 6	0.793131	7.17634	4.69424	9.13444e-05	0.00620137	1.42258	Mcm6	mmu-miR-23b-3p	-1.06605	0.0198663	DOWN	UP	YES
17404503	Mecom	MDS1 and EVI1 complex locus	-0.587819	6.59462	-3.54108	0.00167273	0.0418892	-1.3316	Mecom	mmu-miR-133a-3p	0.967884	0.0235242	UP	DOWN	YES
17259679	Metrnl	meteorin, glial cell differentiation regulator-like	0.525506	6.95218	3.72553	0.00105723	0.0313792	-0.900187	Metrnl	mmu-miR-29b-3p	-0.802632	0.0418224	DOWN	UP	YES
17398180	Mfsd1	major facilitator superfamily domain containing 1	0.768357	9.43968	4.18883	0.000329294	0.0144837	0.203053	Mfsd1	mmu-miR-181b-5p	-1.18269	0.0379446	DOWN	UP	YES
17398180	Mfsd1	major facilitator superfamily domain containing 1	0.768357	9.43968	4.18883	0.000329294	0.0144837	0.203053	Mfsd1	mmu-miR-297a-5p	-1.26548	0.0305066	DOWN	UP	YES
17429632	Mfsd2a	major facilitator superfamily domain containing 2A	0.656147	7.99785	3.16546	0.00419081	0.0737147	-2.189	Mfsd2a	mmu-miR-181b-5p	-1.18269	0.0379446	DOWN	UP	YES
17497334	Mki67	antigen identified by monoclonal antibody Ki 67	1.29707	7.78881	4.06814	0.000446839	0.0177291	-0.0863733	Mki67	mmu-let-7b-5p	-0.818467	0.041336	DOWN	UP	YES
17497334	Mki67	antigen identified by monoclonal antibody Ki 67	1.29707	7.78881	4.06814	0.000446839	0.0177291	-0.0863733	Mki67	mmu-let-7c-5p	-1.47774	0.00234926	DOWN	UP	YES
17497334	Mki67	antigen identified by monoclonal antibody Ki 67	1.29707	7.78881	4.06814	0.000446839	0.0177291	-0.0863733	Mki67	mmu-miR-181b-5p	-1.18269	0.0379446	DOWN	UP	YES
17497334	Mki67	antigen identified by monoclonal antibody Ki 67	1.29707	7.78881	4.06814	0.000446839	0.0177291	-0.0863733	Mki67	mmu-miR-29b-3p	-0.802632	0.0418224	DOWN	UP	YES
17514482	Mmp13	matrix metallopeptidase 13	1.99624	5.01921	7.14709	2.24667e-07	0.000116111	7.13564	Mmp13	mmu-let-7b-5p	-0.818467	0.041336	DOWN	UP	YES
17300279	Mmp14	matrix metallopeptidase 14 (membrane-inserted)	1.25279	9.74118	4.28164	0.000260284	0.0124843	0.426315	Mmp14	mmu-let-7b-5p	-0.818467	0.041336	DOWN	UP	YES
17300279	Mmp14	matrix metallopeptidase 14 (membrane-inserted)	1.25279	9.74118	4.28164	0.000260284	0.0124843	0.426315	Mmp14	mmu-let-7c-5p	-1.47774	0.00234926	DOWN	UP	YES
17300279	Mmp14	matrix metallopeptidase 14 (membrane-inserted)	1.25279	9.74118	4.28164	0.000260284	0.0124843	0.426315	Mmp14	mmu-miR-30d-5p	-0.962649	0.00493363	DOWN	UP	YES
17238558	Mmp19	matrix metallopeptidase 19	1.26286	8.09909	5.60277	9.26973e-06	0.0013495	3.60428	Mmp19	mmu-let-7b-5p	-0.818467	0.041336	DOWN	UP	YES
17238558	Mmp19	matrix metallopeptidase 19	1.26286	8.09909	5.60277	9.26973e-06	0.0013495	3.60428	Mmp19	mmu-miR-30d-5p	-0.962649	0.00493363	DOWN	UP	YES
17379606	Mmp9	matrix metallopeptidase 9	0.613259	7.52096	2.5071	0.0193825	0.182074	-3.58996	Mmp9	mmu-miR-29b-3p	-0.802632	0.0418224	DOWN	UP	YES
17548112	Morf4l2	mortality factor 4 like 2	0.500875	9.67428	3.44031	0.00214507	0.0485696	-1.56469	Morf4l2	mmu-miR-29b-3p	-0.802632	0.0418224	DOWN	UP	YES
17548112	Morf4l2	mortality factor 4 like 2	0.500875	9.67428	3.44031	0.00214507	0.0485696	-1.56469	Morf4l2	mmu-miR-30d-5p	-0.962649	0.00493363	DOWN	UP	YES
17542751	Mpp1	membrane protein, palmitoylated	0.602772	8.4907	3.37668	0.00250781	0.0535458	-1.7108	Mpp1	mmu-miR-181b-5p	-1.18269	0.0379446	DOWN	UP	YES
17542751	Mpp1	membrane protein, palmitoylated	0.602772	8.4907	3.37668	0.00250781	0.0535458	-1.7108	Mpp1	mmu-miR-23b-3p	-1.06605	0.0198663	DOWN	UP	YES
17367102	Mrc1	mannose receptor, C type 1	0.985513	9.11961	3.15767	0.0042702	0.0744	-2.20642	Mrc1	mmu-miR-30d-5p	-0.962649	0.00493363	DOWN	UP	YES
17290770	Mrpl32	mitochondrial ribosomal protein L32	0.517132	6.20659	1.64539	0.112987	0.460122	-5.1116	Mrpl32	mmu-miR-29b-3p	-0.802632	0.0418224	DOWN	UP	YES
17357648	Ms4a4c	membrane-spanning 4-domains, subfamily A, member 4C	0.642963	6.33289	2.52945	0.01844	0.177097	-3.54517	Ms4a4c	mmu-miR-181b-5p	-1.18269	0.0379446	DOWN	UP	YES
17357648	Ms4a4c	membrane-spanning 4-domains, subfamily A, member 4C	0.642963	6.33289	2.52945	0.01844	0.177097	-3.54517	Ms4a4c	mmu-miR-23b-3p	-1.06605	0.0198663	DOWN	UP	YES
17357688	Ms4a6b	membrane-spanning 4-domains, subfamily A, member 6B	1.14339	7.37375	4.94283	4.86476e-05	0.00419872	2.02311	Ms4a6b	mmu-let-7b-5p	-0.818467	0.041336	DOWN	UP	YES
17357688	Ms4a6b	membrane-spanning 4-domains, subfamily A, member 6B	1.14339	7.37375	4.94283	4.86476e-05	0.00419872	2.02311	Ms4a6b	mmu-let-7c-5p	-1.47774	0.00234926	DOWN	UP	YES
17357671	Ms4a6c	membrane-spanning 4-domains, subfamily A, member 6C	1.35259	7.03483	3.38714	0.00244436	0.0526364	-1.68685	Ms4a6c	mmu-miR-5101	-0.666545	0.00398603	DOWN	UP	YES
17362973	Ms4a6d	membrane-spanning 4-domains, subfamily A, member 6D	2.22105	6.08092	5.29067	2.02334e-05	0.00227323	2.85985	Ms4a6d	mmu-let-7b-5p	-0.818467	0.041336	DOWN	UP	YES
17509629	Msmo1	methylsterol monoxygenase 1	0.586301	7.77588	2.04654	0.0518604	0.310447	-4.45762	Msmo1	mmu-miR-23b-3p	-1.06605	0.0198663	DOWN	UP	YES
17509629	Msmo1	methylsterol monoxygenase 1	0.586301	7.77588	2.04654	0.0518604	0.310447	-4.45762	Msmo1	mmu-miR-30d-5p	-0.962649	0.00493363	DOWN	UP	YES
17508850	Msr1	macrophage scavenger receptor 1	2.66263	6.8346	13.206	1.8039e-12	3.72912e-08	17.7234	Msr1	mmu-let-7b-5p	-0.818467	0.041336	DOWN	UP	YES
17508850	Msr1	macrophage scavenger receptor 1	2.66263	6.8346	13.206	1.8039e-12	3.72912e-08	17.7234	Msr1	mmu-miR-30d-5p	-0.962649	0.00493363	DOWN	UP	YES
17503942	Mt1	metallothionein 1	0.84169	9.78112	5.06438	3.5778e-05	0.00339276	2.31615	Mt1	mmu-miR-30d-5p	-0.962649	0.00493363	DOWN	UP	YES
17503937	Mt2	metallothionein 2	1.49079	9.97262	5.54101	1.08115e-05	0.00149001	3.45758	Mt2	mmu-let-7b-5p	-0.818467	0.041336	DOWN	UP	YES
17415380	Mtap	methylthioadenosine phosphorylase	0.530979	7.21141	2.51508	0.0190406	0.18029	-3.57398	Mtap	mmu-let-7c-5p	-1.47774	0.00234926	DOWN	UP	YES
17346817	Mtcl1	microtubule crosslinking factor 1	-0.635953	7.86954	-5.61437	9.00585e-06	0.00131571	3.63181	Mtcl1	mmu-miR-133a-3p	0.967884	0.0235242	UP	DOWN	YES
17231387	Mthfd1l	methylenetetrahydrofolate dehydrogenase (NADP+ dependent) 1-like	0.66821	6.6194	4.97586	4.47482e-05	0.00398603	2.10279	Mthfd1l	mmu-miR-30d-5p	-0.962649	0.00493363	DOWN	UP	YES
17468143	Mthfd2	methylenetetrahydrofolate dehydrogenase (NAD+ dependent), methenyltetrahydrofolate cyclohydrolase	0.665531	6.16237	4.34521	0.000221529	0.0111886	0.579492	Mthfd2	mmu-miR-29b-3p	-0.802632	0.0418224	DOWN	UP	YES
17468143	Mthfd2	methylenetetrahydrofolate dehydrogenase (NAD+ dependent), methenyltetrahydrofolate cyclohydrolase	0.665531	6.16237	4.34521	0.000221529	0.0111886	0.579492	Mthfd2	mmu-miR-5101	-0.666545	0.00398603	DOWN	UP	YES
17465830	Mtpn	myotrophin	0.581638	9.65409	3.26089	0.00332654	0.0643292	-1.97431	Mtpn	mmu-let-7b-5p	-0.818467	0.041336	DOWN	UP	YES
17465830	Mtpn	myotrophin	0.581638	9.65409	3.26089	0.00332654	0.0643292	-1.97431	Mtpn	mmu-miR-181b-5p	-1.18269	0.0379446	DOWN	UP	YES
17465830	Mtpn	myotrophin	0.581638	9.65409	3.26089	0.00332654	0.0643292	-1.97431	Mtpn	mmu-miR-29b-3p	-0.802632	0.0418224	DOWN	UP	YES
17465830	Mtpn	myotrophin	0.581638	9.65409	3.26089	0.00332654	0.0643292	-1.97431	Mtpn	mmu-miR-29c-3p	-0.802632	0.0418224	DOWN	UP	YES
17465830	Mtpn	myotrophin	0.581638	9.65409	3.26089	0.00332654	0.0643292	-1.97431	Mtpn	mmu-miR-30d-5p	-0.962649	0.00493363	DOWN	UP	YES
17508907	Mtus1	mitochondrial tumor suppressor 1	-0.506138	8.70284	-3.93332	0.000627799	0.0222938	-0.408219	Mtus1	mmu-miR-133a-3p	0.967884	0.0235242	UP	DOWN	YES
17311846	Myc	myelocytomatosis oncogene	0.935609	7.59804	7.53265	9.28381e-08	6.85427e-05	7.96757	Myc	mmu-let-7c-5p	-1.47774	0.00234926	DOWN	UP	YES
17493467	Myo7a	myosin VIIA	0.614266	7.31346	4.62861	0.0001079	0.00690575	1.26392	Myo7a	mmu-let-7b-5p	-0.818467	0.041336	DOWN	UP	YES
17493467	Myo7a	myosin VIIA	0.614266	7.31346	4.62861	0.0001079	0.00690575	1.26392	Myo7a	mmu-let-7c-5p	-1.47774	0.00234926	DOWN	UP	YES
17493467	Myo7a	myosin VIIA	0.614266	7.31346	4.62861	0.0001079	0.00690575	1.26392	Myo7a	mmu-miR-568	-1.0469	0.020378	DOWN	UP	YES
17325761	Naa50	N(alpha)-acetyltransferase 50, NatE catalytic subunit	0.641173	8.68529	3.35664	0.00263392	0.0552129	-1.75662	Naa50	mmu-miR-181b-5p	-1.18269	0.0379446	DOWN	UP	YES
17325761	Naa50	N(alpha)-acetyltransferase 50, NatE catalytic subunit	0.641173	8.68529	3.35664	0.00263392	0.0552129	-1.75662	Naa50	mmu-miR-23b-3p	-1.06605	0.0198663	DOWN	UP	YES
17222825	Nabp1	nucleic acid binding protein 1	0.782515	7.8615	4.58786	0.00011966	0.00742842	1.16541	Nabp1	mmu-let-7b-5p	-0.818467	0.041336	DOWN	UP	YES
17222825	Nabp1	nucleic acid binding protein 1	0.782515	7.8615	4.58786	0.00011966	0.00742842	1.16541	Nabp1	mmu-let-7c-5p	-1.47774	0.00234926	DOWN	UP	YES
17222825	Nabp1	nucleic acid binding protein 1	0.782515	7.8615	4.58786	0.00011966	0.00742842	1.16541	Nabp1	mmu-miR-181b-5p	-1.18269	0.0379446	DOWN	UP	YES
17222825	Nabp1	nucleic acid binding protein 1	0.782515	7.8615	4.58786	0.00011966	0.00742842	1.16541	Nabp1	mmu-miR-23b-3p	-1.06605	0.0198663	DOWN	UP	YES
17222825	Nabp1	nucleic acid binding protein 1	0.782515	7.8615	4.58786	0.00011966	0.00742842	1.16541	Nabp1	mmu-miR-30d-5p	-0.962649	0.00493363	DOWN	UP	YES
17295588	Naip5	NLR family, apoptosis inhibitory protein 5	0.740012	6.91432	3.25768	0.00335263	0.0646522	-1.98158	Naip5	mmu-miR-674-5p	-0.546437	0.0466459	DOWN	UP	YES
17478301	Nav2	neuron navigator 2	-0.925526	8.67892	-5.83712	5.18553e-06	0.000893315	4.15788	Nav2	mmu-miR-692	0.6296	0.0221784	UP	DOWN	YES
17471023	Ncapd2	non-SMC condensin I complex, subunit D2	0.528992	7.08233	3.60669	0.00142153	0.037967	-1.17879	Ncapd2	mmu-miR-181b-5p	-1.18269	0.0379446	DOWN	UP	YES
17437278	Ncapg	non-SMC condensin I complex, subunit G	0.733304	5.05641	3.85748	0.000759677	0.025228	-0.588409	Ncapg	mmu-miR-23b-3p	-1.06605	0.0198663	DOWN	UP	YES
17396369	Nceh1	neutral cholesterol ester hydrolase 1	0.578561	8.04694	2.50599	0.0194302	0.182285	-3.59217	Nceh1	mmu-let-7b-5p	-0.818467	0.041336	DOWN	UP	YES
17317652	Ndrg1	N-myc downstream regulated gene 1	0.694841	8.09764	3.62505	0.00135813	0.0370638	-1.13591	Ndrg1	mmu-let-7b-5p	-0.818467	0.041336	DOWN	UP	YES
17317652	Ndrg1	N-myc downstream regulated gene 1	0.694841	8.09764	3.62505	0.00135813	0.0370638	-1.13591	Ndrg1	mmu-let-7c-5p	-1.47774	0.00234926	DOWN	UP	YES
17317652	Ndrg1	N-myc downstream regulated gene 1	0.694841	8.09764	3.62505	0.00135813	0.0370638	-1.13591	Ndrg1	mmu-miR-181b-5p	-1.18269	0.0379446	DOWN	UP	YES
17473171	Ndufa3	NADH:ubiquinone oxidoreductase subunit A3	0.504598	9.58285	2.28769	0.0313106	0.235928	-4.01714	Ndufa3	mmu-miR-23b-3p	-1.06605	0.0198663	DOWN	UP	YES
17370455	Nek6	NIMA (never in mitosis gene a)-related expressed kinase 6	0.908278	7.99904	6.74	5.83135e-07	0.000211194	6.23412	Nek6	mmu-miR-23b-3p	-1.06605	0.0198663	DOWN	UP	YES
17370455	Nek6	NIMA (never in mitosis gene a)-related expressed kinase 6	0.908278	7.99904	6.74	5.83135e-07	0.000211194	6.23412	Nek6	mmu-miR-297a-5p	-1.26548	0.0305066	DOWN	UP	YES
17282563	Npc2	NPC intracellular cholesterol transporter 2	0.86619	11.3282	6.19278	2.16927e-06	0.000477067	4.98735	Npc2	mmu-let-7b-5p	-0.818467	0.041336	DOWN	UP	YES
17282563	Npc2	NPC intracellular cholesterol transporter 2	0.86619	11.3282	6.19278	2.16927e-06	0.000477067	4.98735	Npc2	mmu-let-7c-5p	-1.47774	0.00234926	DOWN	UP	YES
17268884	Nr1d1	nuclear receptor subfamily 1, group D, member 1	-1.54917	9.78573	-6.09731	2.73751e-06	0.000571628	4.76606	Nr1d1	mmu-miR-133a-3p	0.967884	0.0235242	UP	DOWN	YES
17213548	Nrp2	neuropilin 2	0.647588	8.50893	4.17392	0.000341962	0.0148202	0.167239	Nrp2	mmu-let-7b-5p	-0.818467	0.041336	DOWN	UP	YES
17213548	Nrp2	neuropilin 2	0.647588	8.50893	4.17392	0.000341962	0.0148202	0.167239	Nrp2	mmu-let-7c-5p	-1.47774	0.00234926	DOWN	UP	YES
17213548	Nrp2	neuropilin 2	0.647588	8.50893	4.17392	0.000341962	0.0148202	0.167239	Nrp2	mmu-miR-23b-3p	-1.06605	0.0198663	DOWN	UP	YES
17213548	Nrp2	neuropilin 2	0.647588	8.50893	4.17392	0.000341962	0.0148202	0.167239	Nrp2	mmu-miR-297a-5p	-1.26548	0.0305066	DOWN	UP	YES
17467128	Nt5c3	5'-nucleotidase, cytosolic III	0.623946	6.8544	3.06762	0.00529986	0.0849393	-2.40651	Nt5c3	mmu-miR-23b-3p	-1.06605	0.0198663	DOWN	UP	YES
17520073	Nt5e	5' nucleotidase, ecto	0.639173	8.99384	2.48906	0.0201755	0.185393	-3.62595	Nt5e	mmu-let-7b-5p	-0.818467	0.041336	DOWN	UP	YES
17520073	Nt5e	5' nucleotidase, ecto	0.639173	8.99384	2.48906	0.0201755	0.185393	-3.62595	Nt5e	mmu-let-7c-5p	-1.47774	0.00234926	DOWN	UP	YES
17248512	Nudcd2	NudC domain containing 2	0.610513	6.73964	3.7728	0.000939371	0.0292588	-0.788778	Nudcd2	mmu-miR-29b-3p	-0.802632	0.0418224	DOWN	UP	YES
17248512	Nudcd2	NudC domain containing 2	0.610513	6.73964	3.7728	0.000939371	0.0292588	-0.788778	Nudcd2	mmu-miR-29c-3p	-0.802632	0.0418224	DOWN	UP	YES
17457249	Nup205	nucleoporin 205	0.589119	7.35781	3.93307	0.000628185	0.0222938	-0.408799	Nup205	mmu-let-7b-5p	-0.818467	0.041336	DOWN	UP	YES
17457249	Nup205	nucleoporin 205	0.589119	7.35781	3.93307	0.000628185	0.0222938	-0.408799	Nup205	mmu-let-7c-5p	-1.47774	0.00234926	DOWN	UP	YES
17233294	Nus1	NUS1 dehydrodolichyl diphosphate synthase subunit	0.653655	8.53205	5.20039	2.53907e-05	0.00265766	2.64327	Nus1	mmu-miR-181b-5p	-1.18269	0.0379446	DOWN	UP	YES
17233294	Nus1	NUS1 dehydrodolichyl diphosphate synthase subunit	0.653655	8.53205	5.20039	2.53907e-05	0.00265766	2.64327	Nus1	mmu-miR-23b-3p	-1.06605	0.0198663	DOWN	UP	YES
17233294	Nus1	NUS1 dehydrodolichyl diphosphate synthase subunit	0.653655	8.53205	5.20039	2.53907e-05	0.00265766	2.64327	Nus1	mmu-miR-30d-5p	-0.962649	0.00493363	DOWN	UP	YES
17374833	Nusap1	nucleolar and spindle associated protein 1	1.09444	6.12915	4.60867	0.000113501	0.00716442	1.21572	Nusap1	mmu-miR-181b-5p	-1.18269	0.0379446	DOWN	UP	YES
17374833	Nusap1	nucleolar and spindle associated protein 1	1.09444	6.12915	4.60867	0.000113501	0.00716442	1.21572	Nusap1	mmu-miR-30d-5p	-0.962649	0.00493363	DOWN	UP	YES
17452054	Oas2	2'-5' oligoadenylate synthetase 2	1.09614	8.13718	5.16971	2.74303e-05	0.00280026	2.56957	Oas2	mmu-miR-23b-3p	-1.06605	0.0198663	DOWN	UP	YES
17479947	Olfr293	olfactory receptor 293	0.598723	2.50662	2.97085	0.00667074	0.098121	-2.61882	Olfr293	mmu-let-7c-5p	-1.47774	0.00234926	DOWN	UP	YES
17315743	Osmr	oncostatin M receptor	0.608899	9.68682	2.67277	0.0133414	0.147526	-3.25276	Osmr	mmu-miR-30d-5p	-0.962649	0.00493363	DOWN	UP	YES
17410376	Ostc	oligosaccharyltransferase complex subunit (non-catalytic)	0.848607	8.63626	2.57462	0.0166638	0.16755	-3.45395	Ostc	mmu-miR-29b-3p	-0.802632	0.0418224	DOWN	UP	YES
17410376	Ostc	oligosaccharyltransferase complex subunit (non-catalytic)	0.848607	8.63626	2.57462	0.0166638	0.16755	-3.45395	Ostc	mmu-miR-29c-3p	-0.802632	0.0418224	DOWN	UP	YES
17405482	P2ry12	purinergic receptor P2Y, G-protein coupled 12	0.851932	6.65968	4.66663	9.7974e-05	0.006544	1.35583	P2ry12	mmu-miR-297a-5p	-1.26548	0.0305066	DOWN	UP	YES
17405478	P2ry13	purinergic receptor P2Y, G-protein coupled 13	0.963032	6.80878	4.03127	0.000490441	0.0189006	-0.174564	P2ry13	mmu-let-7b-5p	-0.818467	0.041336	DOWN	UP	YES
17405478	P2ry13	purinergic receptor P2Y, G-protein coupled 13	0.963032	6.80878	4.03127	0.000490441	0.0189006	-0.174564	P2ry13	mmu-let-7c-5p	-1.47774	0.00234926	DOWN	UP	YES
17409792	Palmd	palmdelphin	-0.641128	8.61722	-3.29465	0.00306428	0.0610273	-1.89781	Palmd	mmu-miR-692	0.6296	0.0221784	UP	DOWN	YES
17414802	Pappa	pregnancy-associated plasma protein A	0.590028	6.54538	3.71118	0.00109581	0.0321094	-0.933952	Pappa	mmu-miR-5101	-0.666545	0.00398603	DOWN	UP	YES
17530703	Parp3	poly (ADP-ribose) polymerase family, member 3	0.565888	7.83219	3.56516	0.00157585	0.0403728	-1.27561	Parp3	mmu-miR-29b-3p	-0.802632	0.0418224	DOWN	UP	YES
17437558	Pcdh7	protocadherin 7	0.508115	6.19422	2.40319	0.0243797	0.206384	-3.79518	Pcdh7	mmu-let-7b-5p	-0.818467	0.041336	DOWN	UP	YES
17437558	Pcdh7	protocadherin 7	0.508115	6.19422	2.40319	0.0243797	0.206384	-3.79518	Pcdh7	mmu-let-7c-5p	-1.47774	0.00234926	DOWN	UP	YES
17437558	Pcdh7	protocadherin 7	0.508115	6.19422	2.40319	0.0243797	0.206384	-3.79518	Pcdh7	mmu-miR-181b-5p	-1.18269	0.0379446	DOWN	UP	YES
17294368	Pdcd6	programmed cell death 6	0.533899	8.18938	3.42447	0.00223027	0.0497896	-1.60114	Pdcd6	mmu-miR-23b-3p	-1.06605	0.0198663	DOWN	UP	YES
17482021	Pde3b	phosphodiesterase 3B, cGMP-inhibited	0.515974	7.17952	2.65721	0.0138229	0.150003	-3.28492	Pde3b	mmu-let-7b-5p	-0.818467	0.041336	DOWN	UP	YES
17482021	Pde3b	phosphodiesterase 3B, cGMP-inhibited	0.515974	7.17952	2.65721	0.0138229	0.150003	-3.28492	Pde3b	mmu-let-7c-5p	-1.47774	0.00234926	DOWN	UP	YES
17482021	Pde3b	phosphodiesterase 3B, cGMP-inhibited	0.515974	7.17952	2.65721	0.0138229	0.150003	-3.28492	Pde3b	mmu-miR-103-3p	-0.833679	0.0367714	DOWN	UP	YES
17482021	Pde3b	phosphodiesterase 3B, cGMP-inhibited	0.515974	7.17952	2.65721	0.0138229	0.150003	-3.28492	Pde3b	mmu-miR-29b-3p	-0.802632	0.0418224	DOWN	UP	YES
17482021	Pde3b	phosphodiesterase 3B, cGMP-inhibited	0.515974	7.17952	2.65721	0.0138229	0.150003	-3.28492	Pde3b	mmu-miR-29c-3p	-0.802632	0.0418224	DOWN	UP	YES
17398416	Pdgfc	platelet-derived growth factor, C polypeptide	1.22801	6.72157	6.22473	2.00719e-06	0.000461041	5.06118	Pdgfc	mmu-miR-29b-3p	-0.802632	0.0418224	DOWN	UP	YES
17432440	Pdpn	podoplanin	0.586177	10.757	3.35558	0.00264079	0.0553108	-1.75906	Pdpn	mmu-let-7b-5p	-0.818467	0.041336	DOWN	UP	YES
17423030	Penk	preproenkephalin	0.51518	6.35321	2.10474	0.0460209	0.290529	-4.35431	Penk	mmu-let-7b-5p	-0.818467	0.041336	DOWN	UP	YES
17423030	Penk	preproenkephalin	0.51518	6.35321	2.10474	0.0460209	0.290529	-4.35431	Penk	mmu-let-7c-5p	-1.47774	0.00234926	DOWN	UP	YES
17476709	Pepd	peptidase D	0.587041	7.0838	3.41907	0.0022601	0.0503143	-1.61357	Pepd	mmu-miR-29b-3p	-0.802632	0.0418224	DOWN	UP	YES
17251527	Per1	period circadian clock 1	-0.66454	10.0747	-2.12802	0.0438545	0.28324	-4.31243	Per1	mmu-miR-133a-3p	0.967884	0.0235242	UP	DOWN	YES
17433328	Per3	period circadian clock 3	-0.682577	7.67774	-2.3736	0.0260062	0.213483	-3.85267	Per3	mmu-miR-133a-3p	0.967884	0.0235242	UP	DOWN	YES
17242376	Pfkl	phosphofructokinase, liver, B-type	0.574126	7.70235	4.17392	0.000341963	0.0148202	0.167237	Pfkl	mmu-let-7b-5p	-0.818467	0.041336	DOWN	UP	YES
17242376	Pfkl	phosphofructokinase, liver, B-type	0.574126	7.70235	4.17392	0.000341963	0.0148202	0.167237	Pfkl	mmu-let-7c-5p	-1.47774	0.00234926	DOWN	UP	YES
17242376	Pfkl	phosphofructokinase, liver, B-type	0.574126	7.70235	4.17392	0.000341963	0.0148202	0.167237	Pfkl	mmu-miR-1192	-0.92619	0.007197	DOWN	UP	YES
17415815	Pgm2	phosphoglucomutase 2	0.501546	7.64897	4.08745	0.000425557	0.0171488	-0.0401326	Pgm2	mmu-let-7b-5p	-0.818467	0.041336	DOWN	UP	YES
17415815	Pgm2	phosphoglucomutase 2	0.501546	7.64897	4.08745	0.000425557	0.0171488	-0.0401326	Pgm2	mmu-let-7c-5p	-1.47774	0.00234926	DOWN	UP	YES
17286838	Phactr1	phosphatase and actin regulator 1	-0.667911	7.29649	-4.24339	0.000286787	0.0132437	0.334235	Phactr1	mmu-miR-692	0.6296	0.0221784	UP	DOWN	YES
17211305	Pi15	peptidase inhibitor 15	0.676989	6.74206	2.52324	0.0186972	0.178531	-3.55762	Pi15	mmu-let-7b-5p	-0.818467	0.041336	DOWN	UP	YES
17211305	Pi15	peptidase inhibitor 15	0.676989	6.74206	2.52324	0.0186972	0.178531	-3.55762	Pi15	mmu-miR-29b-3p	-0.802632	0.0418224	DOWN	UP	YES
17359520	Pi4k2a	phosphatidylinositol 4-kinase type 2 alpha	0.53888	8.15892	2.54191	0.0179333	0.17456	-3.5201	Pi4k2a	mmu-miR-103-3p	-0.833679	0.0367714	DOWN	UP	YES
17216960	Pigr	polymeric immunoglobulin receptor	-0.753155	8.89597	-1.94069	0.0641866	0.347481	-4.64029	Pigr	mmu-miR-692	0.6296	0.0221784	UP	DOWN	YES
17495414	Pik3c2a	phosphatidylinositol-4-phosphate 3-kinase catalytic subunit type 2 alpha	0.580958	8.57091	2.22562	0.0357372	0.253614	-4.13356	Pik3c2a	mmu-miR-23b-3p	-1.06605	0.0198663	DOWN	UP	YES
17495414	Pik3c2a	phosphatidylinositol-4-phosphate 3-kinase catalytic subunit type 2 alpha	0.580958	8.57091	2.22562	0.0357372	0.253614	-4.13356	Pik3c2a	mmu-miR-29b-3p	-0.802632	0.0418224	DOWN	UP	YES
17433169	Pik3cd	phosphatidylinositol-4,5-bisphosphate 3-kinase catalytic subunit delta	0.60411	7.45153	3.63698	0.00131842	0.0364373	-1.10801	Pik3cd	mmu-miR-30d-5p	-0.962649	0.00493363	DOWN	UP	YES
17382038	Pip4k2a	phosphatidylinositol-5-phosphate 4-kinase, type II, alpha	0.630914	8.27719	4.13754	0.000374935	0.0157059	0.0799275	Pip4k2a	mmu-miR-30d-5p	-0.962649	0.00493363	DOWN	UP	YES
17233373	Pkib	protein kinase inhibitor beta, cAMP dependent, testis specific	0.679133	5.67051	4.88271	5.66452e-05	0.00458316	1.87799	Pkib	mmu-miR-200b-3p	-1.17057	0.00169277	DOWN	UP	YES
17330359	Pla1a	phospholipase A1 member A	1.13222	5.69715	4.30103	0.000247801	0.0120926	0.473003	Pla1a	mmu-let-7b-5p	-0.818467	0.041336	DOWN	UP	YES
17505060	Pla2g15	phospholipase A2, group XV	0.885124	7.76602	4.41451	0.000185806	0.00998977	0.746668	Pla2g15	mmu-let-7b-5p	-0.818467	0.041336	DOWN	UP	YES
17505060	Pla2g15	phospholipase A2, group XV	0.885124	7.76602	4.41451	0.000185806	0.00998977	0.746668	Pla2g15	mmu-let-7c-5p	-1.47774	0.00234926	DOWN	UP	YES
17505060	Pla2g15	phospholipase A2, group XV	0.885124	7.76602	4.41451	0.000185806	0.00998977	0.746668	Pla2g15	mmu-miR-1192	-0.92619	0.007197	DOWN	UP	YES
17499962	Plat	plasminogen activator, tissue	0.901493	8.3524	4.10353	0.00040861	0.0166116	-0.00161496	Plat	mmu-let-7b-5p	-0.818467	0.041336	DOWN	UP	YES
17499962	Plat	plasminogen activator, tissue	0.901493	8.3524	4.10353	0.00040861	0.0166116	-0.00161496	Plat	mmu-let-7c-5p	-1.47774	0.00234926	DOWN	UP	YES
17297537	Plau	plasminogen activator, urokinase	1.44869	6.9641	7.36025	1.37501e-07	8.55351e-05	7.59827	Plau	mmu-miR-1192	-0.92619	0.007197	DOWN	UP	YES
17474974	Plaur	plasminogen activator, urokinase receptor	0.563127	8.36951	3.25994	0.00333424	0.0643576	-1.97646	Plaur	mmu-miR-1192	-0.92619	0.007197	DOWN	UP	YES
17338521	Plcl2	phospholipase C-like 2	0.591344	6.60563	4.14679	0.000366264	0.0154805	0.102116	Plcl2	mmu-let-7b-5p	-0.818467	0.041336	DOWN	UP	YES
17338521	Plcl2	phospholipase C-like 2	0.591344	6.60563	4.14679	0.000366264	0.0154805	0.102116	Plcl2	mmu-let-7c-5p	-1.47774	0.00234926	DOWN	UP	YES
17488292	Pld3	phospholipase D family, member 3	1.12907	9.24722	5.29139	2.01966e-05	0.00227323	2.86159	Pld3	mmu-let-7b-5p	-0.818467	0.041336	DOWN	UP	YES
17260761	Plek	pleckstrin	1.41217	8.9611	6.77409	5.37956e-07	0.00020369	6.31047	Plek	mmu-let-7b-5p	-0.818467	0.041336	DOWN	UP	YES
17260761	Plek	pleckstrin	1.41217	8.9611	6.77409	5.37956e-07	0.00020369	6.31047	Plek	mmu-miR-1192	-0.92619	0.007197	DOWN	UP	YES
17211774	Plekhb2	pleckstrin homology domain containing, family B (evectins) member 2	0.581145	8.5616	3.36634	0.00257216	0.0545084	-1.73446	Plekhb2	mmu-let-7b-5p	-0.818467	0.041336	DOWN	UP	YES
17211774	Plekhb2	pleckstrin homology domain containing, family B (evectins) member 2	0.581145	8.5616	3.36634	0.00257216	0.0545084	-1.73446	Plekhb2	mmu-let-7c-5p	-1.47774	0.00234926	DOWN	UP	YES
17482739	Plk1	polo like kinase 1	0.942581	6.77622	4.53175	0.000137976	0.00818455	1.02982	Plk1	mmu-miR-30d-5p	-0.962649	0.00493363	DOWN	UP	YES
17244439	Plxnc1	plexin C1	0.828395	7.8062	5.97162	3.724e-06	0.000740234	4.47317	Plxnc1	mmu-let-7b-5p	-0.818467	0.041336	DOWN	UP	YES
17244439	Plxnc1	plexin C1	0.828395	7.8062	5.97162	3.724e-06	0.000740234	4.47317	Plxnc1	mmu-let-7c-5p	-1.47774	0.00234926	DOWN	UP	YES
17244439	Plxnc1	plexin C1	0.828395	7.8062	5.97162	3.724e-06	0.000740234	4.47317	Plxnc1	mmu-miR-181b-5p	-1.18269	0.0379446	DOWN	UP	YES
17244439	Plxnc1	plexin C1	0.828395	7.8062	5.97162	3.724e-06	0.000740234	4.47317	Plxnc1	mmu-miR-200b-3p	-1.17057	0.00169277	DOWN	UP	YES
17244439	Plxnc1	plexin C1	0.828395	7.8062	5.97162	3.724e-06	0.000740234	4.47317	Plxnc1	mmu-miR-30d-5p	-0.962649	0.00493363	DOWN	UP	YES
17351414	Pmaip1	phorbol-12-myristate-13-acetate-induced protein 1	0.52838	6.67433	3.92364	0.000643283	0.0226354	-0.431257	Pmaip1	mmu-let-7b-5p	-0.818467	0.041336	DOWN	UP	YES
17351414	Pmaip1	phorbol-12-myristate-13-acetate-induced protein 1	0.52838	6.67433	3.92364	0.000643283	0.0226354	-0.431257	Pmaip1	mmu-let-7c-5p	-1.47774	0.00234926	DOWN	UP	YES
17351414	Pmaip1	phorbol-12-myristate-13-acetate-induced protein 1	0.52838	6.67433	3.92364	0.000643283	0.0226354	-0.431257	Pmaip1	mmu-miR-181b-5p	-1.18269	0.0379446	DOWN	UP	YES
17351414	Pmaip1	phorbol-12-myristate-13-acetate-induced protein 1	0.52838	6.67433	3.92364	0.000643283	0.0226354	-0.431257	Pmaip1	mmu-miR-23b-3p	-1.06605	0.0198663	DOWN	UP	YES
17214166	Pnkd	paroxysmal nonkinesiogenic dyskinesia	-0.582369	7.74503	-3.24535	0.00345448	0.0655765	-2.00944	Pnkd	mmu-miR-133a-3p	0.967884	0.0235242	UP	DOWN	YES
17400139	Pogz	pogo transposable element with ZNF domain	-0.578484	8.45315	-2.77547	0.0105373	0.128591	-3.03804	Pogz	mmu-miR-133a-3p	0.967884	0.0235242	UP	DOWN	YES
17233720	Ppa1	pyrophosphatase (inorganic) 1	0.79875	7.09482	3.87746	0.000722487	0.0242856	-0.540997	Ppa1	mmu-miR-30d-5p	-0.962649	0.00493363	DOWN	UP	YES
17417480	Prdx1	peroxiredoxin 1	0.585387	5.58349	3.15637	0.00428356	0.0745386	-2.20931	Prdx1	mmu-miR-5113	-0.602404	0.0147933	DOWN	UP	YES
17548658	Prdx1	peroxiredoxin 1	0.866759	10.245	2.95102	0.00699089	0.100256	-2.66198	Prdx1	mmu-miR-5113	-0.602404	0.0147933	DOWN	UP	YES
17366141	Prdx3	peroxiredoxin 3	0.649073	8.21176	2.3014	0.0304021	0.231966	-3.99113	Prdx3	mmu-let-7b-5p	-0.818467	0.041336	DOWN	UP	YES
17366141	Prdx3	peroxiredoxin 3	0.649073	8.21176	2.3014	0.0304021	0.231966	-3.99113	Prdx3	mmu-let-7c-5p	-1.47774	0.00234926	DOWN	UP	YES
17227077	Prelp	proline arginine-rich end leucine-rich repeat	-0.697669	11.3891	-2.69922	0.0125585	0.142256	-3.19785	Prelp	mmu-miR-133a-3p	0.967884	0.0235242	UP	DOWN	YES
17227892	Prg4	proteoglycan 4 (megakaryocyte stimulating factor, articular superficial zone protein)	1.01329	5.39501	3.81411	0.000847005	0.0272442	-0.691137	Prg4	mmu-let-7b-5p	-0.818467	0.041336	DOWN	UP	YES
17376541	Prnp	prion protein	0.598109	7.79358	2.29687	0.0306994	0.233037	-3.99973	Prnp	mmu-let-7b-5p	-0.818467	0.041336	DOWN	UP	YES
17376541	Prnp	prion protein	0.598109	7.79358	2.29687	0.0306994	0.233037	-3.99973	Prnp	mmu-let-7c-5p	-1.47774	0.00234926	DOWN	UP	YES
17326510	Pros1	protein S (alpha)	0.542582	8.74337	2.11983	0.0446063	0.285807	-4.32721	Pros1	mmu-let-7b-5p	-0.818467	0.041336	DOWN	UP	YES
17326510	Pros1	protein S (alpha)	0.542582	8.74337	2.11983	0.0446063	0.285807	-4.32721	Pros1	mmu-miR-23b-3p	-1.06605	0.0198663	DOWN	UP	YES
17326510	Pros1	protein S (alpha)	0.542582	8.74337	2.11983	0.0446063	0.285807	-4.32721	Pros1	mmu-miR-29b-3p	-0.802632	0.0418224	DOWN	UP	YES
17267454	Prr11	proline rich 11	1.30556	6.18822	5.22938	2.36042e-05	0.00252828	2.71287	Prr11	mmu-miR-23b-3p	-1.06605	0.0198663	DOWN	UP	YES
17267454	Prr11	proline rich 11	1.30556	6.18822	5.22938	2.36042e-05	0.00252828	2.71287	Prr11	mmu-miR-297a-5p	-1.26548	0.0305066	DOWN	UP	YES
17267454	Prr11	proline rich 11	1.30556	6.18822	5.22938	2.36042e-05	0.00252828	2.71287	Prr11	mmu-miR-30d-5p	-0.962649	0.00493363	DOWN	UP	YES
17388999	Prrg4	proline rich Gla (G-carboxyglutamic acid) 4 (transmembrane)	0.599114	6.93505	3.37355	0.00252713	0.0537632	-1.71797	Prrg4	mmu-let-7c-5p	-1.47774	0.00234926	DOWN	UP	YES
17388999	Prrg4	proline rich Gla (G-carboxyglutamic acid) 4 (transmembrane)	0.599114	6.93505	3.37355	0.00252713	0.0537632	-1.71797	Prrg4	mmu-miR-1192	-0.92619	0.007197	DOWN	UP	YES
17233629	Psap	prosaposin	1.0231	11.2458	6.3651	1.42901e-06	0.000355023	5.38402	Psap	mmu-miR-181b-5p	-1.18269	0.0379446	DOWN	UP	YES
17233629	Psap	prosaposin	1.0231	11.2458	6.3651	1.42901e-06	0.000355023	5.38402	Psap	mmu-miR-23b-3p	-1.06605	0.0198663	DOWN	UP	YES
17509723	Psd3	pleckstrin and Sec7 domain containing 3	-0.67755	7.78896	-4.72477	8.45358e-05	0.00588406	1.49638	Psd3	mmu-miR-133a-3p	0.967884	0.0235242	UP	DOWN	YES
17285386	Psma2	proteasome (prosome, macropain) subunit, alpha type 2	0.779285	8.5553	2.89373	0.00799979	0.109167	-2.78588	Psma2	mmu-miR-30d-5p	-0.962649	0.00493363	DOWN	UP	YES
17517456	Psma4	proteasome (prosome, macropain) subunit, alpha type 4	0.545702	8.46742	2.83993	0.00907236	0.117844	-2.90121	Psma4	mmu-miR-29b-3p	-0.802632	0.0418224	DOWN	UP	YES
17517456	Psma4	proteasome (prosome, macropain) subunit, alpha type 4	0.545702	8.46742	2.83993	0.00907236	0.117844	-2.90121	Psma4	mmu-miR-29c-3p	-0.802632	0.0418224	DOWN	UP	YES
17418629	Psmb2	proteasome (prosome, macropain) subunit, beta type 2	0.553097	8.07001	3.06859	0.00528751	0.0848323	-2.40435	Psmb2	mmu-let-7b-5p	-0.818467	0.041336	DOWN	UP	YES
17418629	Psmb2	proteasome (prosome, macropain) subunit, beta type 2	0.553097	8.07001	3.06859	0.00528751	0.0848323	-2.40435	Psmb2	mmu-let-7c-5p	-1.47774	0.00234926	DOWN	UP	YES
17544960	Psmd10	proteasome (prosome, macropain) 26S subunit, non-ATPase, 10	0.783151	7.04923	4.74421	8.0469e-05	0.00568716	1.54336	Psmd10	mmu-let-7b-5p	-0.818467	0.041336	DOWN	UP	YES
17324034	Psmd2	proteasome (prosome, macropain) 26S subunit, non-ATPase, 2	0.501997	8.76893	3.50164	0.00184408	0.0443444	-1.42307	Psmd2	mmu-miR-181b-5p	-1.18269	0.0379446	DOWN	UP	YES
17299180	Ptger2	prostaglandin E receptor 2 (subtype EP2)	0.547694	6.11703	2.96762	0.00672189	0.0983469	-2.62586	Ptger2	mmu-miR-29b-3p	-0.802632	0.0418224	DOWN	UP	YES
17299180	Ptger2	prostaglandin E receptor 2 (subtype EP2)	0.547694	6.11703	2.96762	0.00672189	0.0983469	-2.62586	Ptger2	mmu-miR-29c-3p	-0.802632	0.0418224	DOWN	UP	YES
17315718	Ptger4	prostaglandin E receptor 4 (subtype EP4)	1.0647	6.9193	7.27767	1.66193e-07	9.55782e-05	7.41983	Ptger4	mmu-miR-23b-3p	-1.06605	0.0198663	DOWN	UP	YES
17401269	Ptpn22	protein tyrosine phosphatase, non-receptor type 22 (lymphoid)	0.662089	7.52037	3.05292	0.00548914	0.0871538	-2.43895	Ptpn22	mmu-let-7b-5p	-0.818467	0.041336	DOWN	UP	YES
17217566	Ptpn7	protein tyrosine phosphatase, non-receptor type 7	0.511393	6.78272	3.10515	0.00484454	0.0803762	-2.32339	Ptpn7	mmu-miR-3064-5p	-0.505052	0.0268297	DOWN	UP	YES
17227536	Ptprc	protein tyrosine phosphatase, receptor type, C	0.563021	9.39773	3.06	0.00539716	0.0860902	-2.42333	Ptprc	mmu-let-7b-5p	-0.818467	0.041336	DOWN	UP	YES
17227536	Ptprc	protein tyrosine phosphatase, receptor type, C	0.563021	9.39773	3.06	0.00539716	0.0860902	-2.42333	Ptprc	mmu-let-7c-5p	-1.47774	0.00234926	DOWN	UP	YES
17227536	Ptprc	protein tyrosine phosphatase, receptor type, C	0.563021	9.39773	3.06	0.00539716	0.0860902	-2.42333	Ptprc	mmu-miR-181b-5p	-1.18269	0.0379446	DOWN	UP	YES
17227536	Ptprc	protein tyrosine phosphatase, receptor type, C	0.563021	9.39773	3.06	0.00539716	0.0860902	-2.42333	Ptprc	mmu-miR-23b-3p	-1.06605	0.0198663	DOWN	UP	YES
17227536	Ptprc	protein tyrosine phosphatase, receptor type, C	0.563021	9.39773	3.06	0.00539716	0.0860902	-2.42333	Ptprc	mmu-miR-30d-5p	-0.962649	0.00493363	DOWN	UP	YES
17232358	Ptprk	protein tyrosine phosphatase, receptor type, K	-0.542233	9.5538	-4.07897	0.000434776	0.0173178	-0.0604421	Ptprk	mmu-miR-133a-3p	0.967884	0.0235242	UP	DOWN	YES
17224551	Ptprn	protein tyrosine phosphatase, receptor type, N	1.16437	6.30036	8.77398	6.16637e-09	1.96114e-05	10.4945	Ptprn	mmu-let-7b-5p	-0.818467	0.041336	DOWN	UP	YES
17224551	Ptprn	protein tyrosine phosphatase, receptor type, N	1.16437	6.30036	8.77398	6.16637e-09	1.96114e-05	10.4945	Ptprn	mmu-let-7c-5p	-1.47774	0.00234926	DOWN	UP	YES
17500441	Purg	purine-rich element binding protein G	-0.606379	6.57465	-3.41096	0.00230557	0.0508937	-1.6322	Purg	mmu-miR-133a-3p	0.967884	0.0235242	UP	DOWN	YES
17487489	Pvr	poliovirus receptor	0.510894	8.42329	2.72086	0.0119505	0.138401	-3.15272	Pvr	mmu-let-7b-5p	-0.818467	0.041336	DOWN	UP	YES
17487489	Pvr	poliovirus receptor	0.510894	8.42329	2.72086	0.0119505	0.138401	-3.15272	Pvr	mmu-let-7c-5p	-1.47774	0.00234926	DOWN	UP	YES
17487489	Pvr	poliovirus receptor	0.510894	8.42329	2.72086	0.0119505	0.138401	-3.15272	Pvr	mmu-miR-23b-3p	-1.06605	0.0198663	DOWN	UP	YES
17239227	Rab32	RAB32, member RAS oncogene family	0.879978	6.9462	4.73656	8.20449e-05	0.0057494	1.52488	Rab32	mmu-miR-30d-5p	-0.962649	0.00493363	DOWN	UP	YES
17528405	Rab8b	RAB8B, member RAS oncogene family	0.809473	8.1685	3.9967	0.00053514	0.0199148	-0.257142	Rab8b	mmu-let-7b-5p	-0.818467	0.041336	DOWN	UP	YES
17528405	Rab8b	RAB8B, member RAS oncogene family	0.809473	8.1685	3.9967	0.00053514	0.0199148	-0.257142	Rab8b	mmu-let-7c-5p	-1.47774	0.00234926	DOWN	UP	YES
17528405	Rab8b	RAB8B, member RAS oncogene family	0.809473	8.1685	3.9967	0.00053514	0.0199148	-0.257142	Rab8b	mmu-miR-181b-5p	-1.18269	0.0379446	DOWN	UP	YES
17528405	Rab8b	RAB8B, member RAS oncogene family	0.809473	8.1685	3.9967	0.00053514	0.0199148	-0.257142	Rab8b	mmu-miR-29b-3p	-0.802632	0.0418224	DOWN	UP	YES
17528405	Rab8b	RAB8B, member RAS oncogene family	0.809473	8.1685	3.9967	0.00053514	0.0199148	-0.257142	Rab8b	mmu-miR-29c-3p	-0.802632	0.0418224	DOWN	UP	YES
17528405	Rab8b	RAB8B, member RAS oncogene family	0.809473	8.1685	3.9967	0.00053514	0.0199148	-0.257142	Rab8b	mmu-miR-30d-5p	-0.962649	0.00493363	DOWN	UP	YES
17528405	Rab8b	RAB8B, member RAS oncogene family	0.809473	8.1685	3.9967	0.00053514	0.0199148	-0.257142	Rab8b	mmu-miR-5101	-0.666545	0.00398603	DOWN	UP	YES
17319037	Rac2	Rac family small GTPase 2	0.542247	9.63564	3.33056	0.0028073	0.0576591	-1.81613	Rac2	mmu-let-7b-5p	-0.818467	0.041336	DOWN	UP	YES
17319037	Rac2	Rac family small GTPase 2	0.542247	9.63564	3.33056	0.0028073	0.0576591	-1.81613	Rac2	mmu-let-7c-5p	-1.47774	0.00234926	DOWN	UP	YES
17469636	Rad18	RAD18 E3 ubiquitin protein ligase	0.568449	7.47999	2.93712	0.00722381	0.102565	-2.69213	Rad18	mmu-miR-5101	-0.666545	0.00398603	DOWN	UP	YES
17397962	Rap2b	RAP2B, member of RAS oncogene family	0.918505	6.72077	5.58667	9.64871e-06	0.00138999	3.56608	Rap2b	mmu-miR-23b-3p	-1.06605	0.0198663	DOWN	UP	YES
17541612	Rap2c	RAP2C, member of RAS oncogene family	0.707948	7.54705	2.78214	0.0103757	0.127371	-3.02394	Rap2c	mmu-miR-103-3p	-0.833679	0.0367714	DOWN	UP	YES
17541612	Rap2c	RAP2C, member of RAS oncogene family	0.707948	7.54705	2.78214	0.0103757	0.127371	-3.02394	Rap2c	mmu-miR-30d-5p	-0.962649	0.00493363	DOWN	UP	YES
17322181	Rarg	retinoic acid receptor, gamma	-0.511539	7.76012	-4.24338	0.000286795	0.0132437	0.334208	Rarg	mmu-miR-133a-3p	0.967884	0.0235242	UP	DOWN	YES
17393684	Rbl1	RB transcriptional corepressor like 1	0.551899	7.49266	3.59539	0.00146199	0.0384517	-1.20517	Rbl1	mmu-miR-23b-3p	-1.06605	0.0198663	DOWN	UP	YES
17266038	Rflnb	refilin B	0.53063	7.32568	2.60733	0.0154789	0.160074	-3.38735	Rflnb	mmu-miR-297a-5p	-1.26548	0.0305066	DOWN	UP	YES
17496887	Rgs10	regulator of G-protein signalling 10	0.548611	6.8885	2.57294	0.016727	0.167746	-3.45736	Rgs10	mmu-miR-29b-3p	-0.802632	0.0418224	DOWN	UP	YES
17496887	Rgs10	regulator of G-protein signalling 10	0.548611	6.8885	2.57294	0.016727	0.167746	-3.45736	Rgs10	mmu-miR-29c-3p	-0.802632	0.0418224	DOWN	UP	YES
17218321	Rgs16	regulator of G-protein signaling 16	0.934261	6.2811	4.10709	0.000404955	0.0165311	0.00690138	Rgs16	mmu-let-7b-5p	-0.818467	0.041336	DOWN	UP	YES
17218321	Rgs16	regulator of G-protein signaling 16	0.934261	6.2811	4.10709	0.000404955	0.0165311	0.00690138	Rgs16	mmu-let-7c-5p	-1.47774	0.00234926	DOWN	UP	YES
17227764	Rgs2	regulator of G-protein signaling 2	0.51303	9.00171	3.04963	0.00553235	0.0874035	-2.44619	Rgs2	mmu-miR-181b-5p	-1.18269	0.0379446	DOWN	UP	YES
17227764	Rgs2	regulator of G-protein signaling 2	0.51303	9.00171	3.04963	0.00553235	0.0874035	-2.44619	Rgs2	mmu-miR-30d-5p	-0.962649	0.00493363	DOWN	UP	YES
17229454	Rgs4	regulator of G-protein signaling 4	1.2074	6.9404	4.99283	4.28681e-05	0.00389534	2.14372	Rgs4	mmu-let-7b-5p	-0.818467	0.041336	DOWN	UP	YES
17229454	Rgs4	regulator of G-protein signaling 4	1.2074	6.9404	4.99283	4.28681e-05	0.00389534	2.14372	Rgs4	mmu-let-7c-5p	-1.47774	0.00234926	DOWN	UP	YES
17219139	Rgs5	regulator of G-protein signaling 5	1.05085	7.58225	3.58236	0.00151004	0.0392104	-1.23555	Rgs5	mmu-miR-181b-5p	-1.18269	0.0379446	DOWN	UP	YES
17377177	Rin2	Ras and Rab interactor 2	-0.59803	9.06594	-4.18324	0.000333981	0.0146121	0.189643	Rin2	mmu-miR-133a-3p	0.967884	0.0235242	UP	DOWN	YES
17402977	Rmnd5a	required for meiotic nuclear division 5 homolog A	0.604321	3.60017	2.51113	0.0192091	0.181035	-3.58189	Rmnd5a	mmu-let-7b-5p	-0.818467	0.041336	DOWN	UP	YES
17402977	Rmnd5a	required for meiotic nuclear division 5 homolog A	0.604321	3.60017	2.51113	0.0192091	0.181035	-3.58189	Rmnd5a	mmu-miR-23b-3p	-1.06605	0.0198663	DOWN	UP	YES
17402977	Rmnd5a	required for meiotic nuclear division 5 homolog A	0.604321	3.60017	2.51113	0.0192091	0.181035	-3.58189	Rmnd5a	mmu-miR-29b-3p	-0.802632	0.0418224	DOWN	UP	YES
17402977	Rmnd5a	required for meiotic nuclear division 5 homolog A	0.604321	3.60017	2.51113	0.0192091	0.181035	-3.58189	Rmnd5a	mmu-miR-29c-3p	-0.802632	0.0418224	DOWN	UP	YES
17402977	Rmnd5a	required for meiotic nuclear division 5 homolog A	0.604321	3.60017	2.51113	0.0192091	0.181035	-3.58189	Rmnd5a	mmu-miR-30d-5p	-0.962649	0.00493363	DOWN	UP	YES
17222549	Rnf149	ring finger protein 149	1.00194	8.06083	7.07481	2.65722e-07	0.000120728	6.97727	Rnf149	mmu-let-7b-5p	-0.818467	0.041336	DOWN	UP	YES
17240342	Rpf2	ribosome production factor 2 homolog	0.504562	6.64424	2.55609	0.0173722	0.171315	-3.49147	Rpf2	mmu-miR-30d-5p	-0.962649	0.00493363	DOWN	UP	YES
17240342	Rpf2	ribosome production factor 2 homolog	0.504562	6.64424	2.55609	0.0173722	0.171315	-3.49147	Rpf2	mmu-miR-5101	-0.666545	0.00398603	DOWN	UP	YES
17469936	Rpl32	ribosomal protein L32	0.822648	10.4385	4.67488	9.59452e-05	0.00641886	1.37576	Rpl32	mmu-miR-23b-3p	-1.06605	0.0198663	DOWN	UP	YES
17469936	Rpl32	ribosomal protein L32	0.822648	10.4385	4.67488	9.59452e-05	0.00641886	1.37576	Rpl32	mmu-miR-30d-5p	-0.962649	0.00493363	DOWN	UP	YES
17549432	Rpl32	ribosomal protein L32	0.728907	9.85827	2.44491	0.0222452	0.195147	-3.71339	Rpl32	mmu-miR-23b-3p	-1.06605	0.0198663	DOWN	UP	YES
17549432	Rpl32	ribosomal protein L32	0.728907	9.85827	2.44491	0.0222452	0.195147	-3.71339	Rpl32	mmu-miR-30d-5p	-0.962649	0.00493363	DOWN	UP	YES
17490599	Rps11	ribosomal protein S11	0.581553	7.01319	2.24154	0.0345508	0.249259	-4.1039	Rps11	mmu-let-7b-5p	-0.818467	0.041336	DOWN	UP	YES
17490599	Rps11	ribosomal protein S11	0.581553	7.01319	2.24154	0.0345508	0.249259	-4.1039	Rps11	mmu-let-7c-5p	-1.47774	0.00234926	DOWN	UP	YES
17473234	Rps9	ribosomal protein S9	0.500324	9.71565	3.82719	0.000819684	0.0267692	-0.660191	Rps9	mmu-miR-23b-3p	-1.06605	0.0198663	DOWN	UP	YES
17512321	Rrad	Ras-related associated with diabetes	0.633349	6.49055	3.50748	0.00181765	0.0439789	-1.40954	Rrad	mmu-miR-1192	-0.92619	0.007197	DOWN	UP	YES
17512321	Rrad	Ras-related associated with diabetes	0.633349	6.49055	3.50748	0.00181765	0.0439789	-1.40954	Rrad	mmu-miR-30d-5p	-0.962649	0.00493363	DOWN	UP	YES
17274540	Rrm2	ribonucleotide reductase M2	0.813234	6.24022	4.32237	0.000234746	0.0116123	0.524422	Rrm2	mmu-let-7c-5p	-1.47774	0.00234926	DOWN	UP	YES
17248104	Rtn4	reticulon 4	0.526957	7.90726	3.14759	0.00437504	0.0755426	-2.22892	Rtn4	mmu-miR-23b-3p	-1.06605	0.0198663	DOWN	UP	YES
17248104	Rtn4	reticulon 4	0.526957	7.90726	3.14759	0.00437504	0.0755426	-2.22892	Rtn4	mmu-miR-30d-5p	-0.962649	0.00493363	DOWN	UP	YES
17531693	Rtp3	receptor transporter protein 3	-0.965894	7.59285	-5.63913	8.46808e-06	0.00128247	3.69051	Rtp3	mmu-miR-692	0.6296	0.0221784	UP	DOWN	YES
17324446	Rtp4	receptor transporter protein 4	0.764755	8.23729	3.77489	0.00093447	0.029137	-0.783845	Rtp4	mmu-miR-23b-3p	-1.06605	0.0198663	DOWN	UP	YES
17400000	S100a10	S100 calcium binding protein A10 (calpactin)	0.640604	9.4766	3.46748	0.00200621	0.0466517	-1.50203	S100a10	mmu-miR-30d-5p	-0.962649	0.00493363	DOWN	UP	YES
17399812	S100a6	S100 calcium binding protein A6 (calcyclin)	1.19934	9.29553	5.36127	1.69477e-05	0.00197938	3.02888	S100a6	mmu-let-7c-5p	-1.47774	0.00234926	DOWN	UP	YES
17234494	S100b	S100 protein, beta polypeptide, neural	0.90223	5.29025	5.15644	2.83636e-05	0.00288131	2.53766	S100b	mmu-miR-297a-5p	-1.26548	0.0305066	DOWN	UP	YES
17509455	Sap30	sin3 associated polypeptide	0.548082	6.63165	3.82081	0.000832908	0.0269745	-0.675297	Sap30	mmu-miR-30d-5p	-0.962649	0.00493363	DOWN	UP	YES
17545595	Sat1	spermidine/spermine N1-acetyl transferase 1	0.82858	9.22415	4.67871	9.50154e-05	0.00637729	1.38504	Sat1	mmu-let-7c-5p	-1.47774	0.00234926	DOWN	UP	YES
17242785	Sbno2	strawberry notch 2	0.767412	7.94977	5.08159	3.42569e-05	0.00329384	2.35759	Sbno2	mmu-miR-29b-3p	-0.802632	0.0418224	DOWN	UP	YES
17527520	Scamp5	secretory carrier membrane protein 5	0.555057	7.42301	3.1957	0.00389584	0.0705534	-2.12123	Scamp5	mmu-let-7b-5p	-0.818467	0.041336	DOWN	UP	YES
17527520	Scamp5	secretory carrier membrane protein 5	0.555057	7.42301	3.1957	0.00389584	0.0705534	-2.12123	Scamp5	mmu-let-7c-5p	-1.47774	0.00234926	DOWN	UP	YES
17527520	Scamp5	secretory carrier membrane protein 5	0.555057	7.42301	3.1957	0.00389584	0.0705534	-2.12123	Scamp5	mmu-miR-181b-5p	-1.18269	0.0379446	DOWN	UP	YES
17527520	Scamp5	secretory carrier membrane protein 5	0.555057	7.42301	3.1957	0.00389584	0.0705534	-2.12123	Scamp5	mmu-miR-23b-3p	-1.06605	0.0198663	DOWN	UP	YES
17527520	Scamp5	secretory carrier membrane protein 5	0.555057	7.42301	3.1957	0.00389584	0.0705534	-2.12123	Scamp5	mmu-miR-29b-3p	-0.802632	0.0418224	DOWN	UP	YES
17365098	Scd1	stearoyl-Coenzyme A desaturase 1	0.550117	11.9934	2.22941	0.0354514	0.252583	-4.12652	Scd1	mmu-let-7b-5p	-0.818467	0.041336	DOWN	UP	YES
17365098	Scd1	stearoyl-Coenzyme A desaturase 1	0.550117	11.9934	2.22941	0.0354514	0.252583	-4.12652	Scd1	mmu-let-7c-5p	-1.47774	0.00234926	DOWN	UP	YES
17365098	Scd1	stearoyl-Coenzyme A desaturase 1	0.550117	11.9934	2.22941	0.0354514	0.252583	-4.12652	Scd1	mmu-miR-103-3p	-0.833679	0.0367714	DOWN	UP	YES
17365098	Scd1	stearoyl-Coenzyme A desaturase 1	0.550117	11.9934	2.22941	0.0354514	0.252583	-4.12652	Scd1	mmu-miR-297a-5p	-1.26548	0.0305066	DOWN	UP	YES
17365098	Scd1	stearoyl-Coenzyme A desaturase 1	0.550117	11.9934	2.22941	0.0354514	0.252583	-4.12652	Scd1	mmu-miR-29b-3p	-0.802632	0.0418224	DOWN	UP	YES
17267601	Scpep1	serine carboxypeptidase 1	0.691859	9.30677	1.95473	0.0624152	0.34237	-4.61645	Scpep1	mmu-let-7b-5p	-0.818467	0.041336	DOWN	UP	YES
17267601	Scpep1	serine carboxypeptidase 1	0.691859	9.30677	1.95473	0.0624152	0.34237	-4.61645	Scpep1	mmu-miR-29b-3p	-0.802632	0.0418224	DOWN	UP	YES
17411605	Sdcbp	syndecan binding protein	0.842799	8.63458	4.30854	0.000243127	0.0119397	0.49109	Sdcbp	mmu-miR-181b-5p	-1.18269	0.0379446	DOWN	UP	YES
17411605	Sdcbp	syndecan binding protein	0.842799	8.63458	4.30854	0.000243127	0.0119397	0.49109	Sdcbp	mmu-miR-23b-3p	-1.06605	0.0198663	DOWN	UP	YES
17411605	Sdcbp	syndecan binding protein	0.842799	8.63458	4.30854	0.000243127	0.0119397	0.49109	Sdcbp	mmu-miR-30d-5p	-0.962649	0.00493363	DOWN	UP	YES
17328625	Sdf2l1	stromal cell-derived factor 2-like 1	0.657778	7.5494	2.81589	0.00959449	0.121384	-2.95241	Sdf2l1	mmu-miR-181b-5p	-1.18269	0.0379446	DOWN	UP	YES
17262549	Sec24a	Sec24 related gene family, member A (S. cerevisiae)	0.958613	10.0314	2.52519	0.018616	0.178125	-3.55371	Sec24a	mmu-miR-181b-5p	-1.18269	0.0379446	DOWN	UP	YES
17262549	Sec24a	Sec24 related gene family, member A (S. cerevisiae)	0.958613	10.0314	2.52519	0.018616	0.178125	-3.55371	Sec24a	mmu-miR-23b-3p	-1.06605	0.0198663	DOWN	UP	YES
17262549	Sec24a	Sec24 related gene family, member A (S. cerevisiae)	0.958613	10.0314	2.52519	0.018616	0.178125	-3.55371	Sec24a	mmu-miR-297a-5p	-1.26548	0.0305066	DOWN	UP	YES
17262549	Sec24a	Sec24 related gene family, member A (S. cerevisiae)	0.958613	10.0314	2.52519	0.018616	0.178125	-3.55371	Sec24a	mmu-miR-30d-5p	-0.962649	0.00493363	DOWN	UP	YES
17334902	Sec24a	Sec24 related gene family, member A (S. cerevisiae)	0.51433	12.133	2.07004	0.0494275	0.301992	-4.41614	Sec24a	mmu-miR-181b-5p	-1.18269	0.0379446	DOWN	UP	YES
17334902	Sec24a	Sec24 related gene family, member A (S. cerevisiae)	0.51433	12.133	2.07004	0.0494275	0.301992	-4.41614	Sec24a	mmu-miR-23b-3p	-1.06605	0.0198663	DOWN	UP	YES
17334902	Sec24a	Sec24 related gene family, member A (S. cerevisiae)	0.51433	12.133	2.07004	0.0494275	0.301992	-4.41614	Sec24a	mmu-miR-297a-5p	-1.26548	0.0305066	DOWN	UP	YES
17334902	Sec24a	Sec24 related gene family, member A (S. cerevisiae)	0.51433	12.133	2.07004	0.0494275	0.301992	-4.41614	Sec24a	mmu-miR-30d-5p	-0.962649	0.00493363	DOWN	UP	YES
17451437	Selplg	selectin, platelet (p-selectin) ligand	0.785076	9.56606	4.3577	0.000214623	0.0109686	0.609592	Selplg	mmu-miR-29b-3p	-0.802632	0.0418224	DOWN	UP	YES
17451437	Selplg	selectin, platelet (p-selectin) ligand	0.785076	9.56606	4.3577	0.000214623	0.0109686	0.609592	Selplg	mmu-miR-29c-3p	-0.802632	0.0418224	DOWN	UP	YES
17292569	Sema4d	sema domain, immunoglobulin domain (Ig), transmembrane domain (TM) and short cytoplasmic domain, (semaphorin) 4D	0.56172	7.30882	3.82847	0.000817058	0.0267257	-0.657162	Sema4d	mmu-let-7b-5p	-0.818467	0.041336	DOWN	UP	YES
17292569	Sema4d	sema domain, immunoglobulin domain (Ig), transmembrane domain (TM) and short cytoplasmic domain, (semaphorin) 4D	0.56172	7.30882	3.82847	0.000817058	0.0267257	-0.657162	Sema4d	mmu-let-7c-5p	-1.47774	0.00234926	DOWN	UP	YES
17292569	Sema4d	sema domain, immunoglobulin domain (Ig), transmembrane domain (TM) and short cytoplasmic domain, (semaphorin) 4D	0.56172	7.30882	3.82847	0.000817058	0.0267257	-0.657162	Sema4d	mmu-miR-30d-5p	-0.962649	0.00493363	DOWN	UP	YES
17354299	Sema6a	sema domain, transmembrane domain (TM), and cytoplasmic domain, (semaphorin) 6A	-1.21246	9.51548	-4.93713	4.93549e-05	0.00419872	2.00935	Sema6a	mmu-miR-692	0.6296	0.0221784	UP	DOWN	YES
17517812	Sema7a	sema domain, immunoglobulin domain (Ig), and GPI membrane anchor, (semaphorin) 7A	0.564315	9.09273	2.7342	0.0115896	0.136273	-3.12481	Sema7a	mmu-let-7b-5p	-0.818467	0.041336	DOWN	UP	YES
17496651	Sephs2	selenophosphate synthetase 2	0.599367	6.97584	3.97127	0.000570569	0.020806	-0.317806	Sephs2	mmu-let-7b-5p	-0.818467	0.041336	DOWN	UP	YES
17496651	Sephs2	selenophosphate synthetase 2	0.599367	6.97584	3.97127	0.000570569	0.020806	-0.317806	Sephs2	mmu-let-7c-5p	-1.47774	0.00234926	DOWN	UP	YES
17278321	Serpina3m	serine (or cysteine) peptidase inhibitor, clade A, member 3M	0.748625	6.43534	2.5812	0.0164188	0.165863	-3.44058	Serpina3m	mmu-miR-30d-5p	-0.962649	0.00493363	DOWN	UP	YES
17278328	Serpina3n	serine (or cysteine) peptidase inhibitor, clade A, member 3N	1.45198	11.0505	3.88139	0.000715392	0.0241255	-0.531673	Serpina3n	mmu-miR-103-3p	-0.833679	0.0367714	DOWN	UP	YES
17286354	Serpinb6b	serine (or cysteine) peptidase inhibitor, clade B, member 6b	0.644431	9.18187	2.86791	0.0084985	0.113236	-2.84135	Serpinb6b	mmu-miR-30d-5p	-0.962649	0.00493363	DOWN	UP	YES
17286375	Serpinb9b	serine (or cysteine) peptidase inhibitor, clade B, member 9b	1.01786	6.35172	4.3647	0.000210845	0.0108291	0.62647	Serpinb9b	mmu-let-7b-5p	-0.818467	0.041336	DOWN	UP	YES
17286375	Serpinb9b	serine (or cysteine) peptidase inhibitor, clade B, member 9b	1.01786	6.35172	4.3647	0.000210845	0.0108291	0.62647	Serpinb9b	mmu-let-7c-5p	-1.47774	0.00234926	DOWN	UP	YES
17453819	Serpine1	serine (or cysteine) peptidase inhibitor, clade E, member 1	1.7606	7.86686	7.75015	5.68778e-08	5.34457e-05	8.42719	Serpine1	mmu-miR-30d-5p	-0.962649	0.00493363	DOWN	UP	YES
17547931	Set	SET nuclear oncogene	0.507777	8.39997	2.14237	0.0425658	0.278859	-4.28648	Set	mmu-let-7c-5p	-1.47774	0.00234926	DOWN	UP	YES
17547931	Set	SET nuclear oncogene	0.507777	8.39997	2.14237	0.0425658	0.278859	-4.28648	Set	mmu-miR-1192	-0.92619	0.007197	DOWN	UP	YES
17500068	Sfrp1	secreted frizzled-related protein 1	0.827501	7.91376	2.04181	0.0523621	0.312442	-4.46591	Sfrp1	mmu-let-7b-5p	-0.818467	0.041336	DOWN	UP	YES
17500068	Sfrp1	secreted frizzled-related protein 1	0.827501	7.91376	2.04181	0.0523621	0.312442	-4.46591	Sfrp1	mmu-miR-181b-5p	-1.18269	0.0379446	DOWN	UP	YES
17287414	Sfxn1	sideroflexin 1	0.52792	8.19326	2.69433	0.0127	0.143347	-3.20802	Sfxn1	mmu-miR-181b-5p	-1.18269	0.0379446	DOWN	UP	YES
17287414	Sfxn1	sideroflexin 1	0.52792	8.19326	2.69433	0.0127	0.143347	-3.20802	Sfxn1	mmu-miR-29b-3p	-0.802632	0.0418224	DOWN	UP	YES
17241162	Sgpl1	sphingosine phosphate lyase 1	0.924928	8.24898	4.45825	0.000166284	0.00921973	0.852247	Sgpl1	mmu-miR-181b-5p	-1.18269	0.0379446	DOWN	UP	YES
17431181	Sh3bgrl3	SH3 domain binding glutamic acid-rich protein-like 3	0.736783	10.3552	2.72634	0.0118009	0.137439	-3.14126	Sh3bgrl3	mmu-miR-29b-3p	-0.802632	0.0418224	DOWN	UP	YES
17431181	Sh3bgrl3	SH3 domain binding glutamic acid-rich protein-like 3	0.736783	10.3552	2.72634	0.0118009	0.137439	-3.14126	Sh3bgrl3	mmu-miR-29c-3p	-0.802632	0.0418224	DOWN	UP	YES
17436607	Sh3bp2	SH3-domain binding protein 2	1.06613	7.28053	6.90743	3.92925e-07	0.000157723	6.6077	Sh3bp2	mmu-let-7c-5p	-1.47774	0.00234926	DOWN	UP	YES
17365476	Sh3pxd2a	SH3 and PX domains 2A	-0.575389	7.95304	-3.81645	0.000842052	0.0271777	-0.685602	Sh3pxd2a	mmu-miR-133a-3p	0.967884	0.0235242	UP	DOWN	YES
17248288	Sh3pxd2b	SH3 and PX domains 2B	1.10395	7.36349	5.86681	4.81926e-06	0.000867623	4.22765	Sh3pxd2b	mmu-miR-29b-3p	-0.802632	0.0418224	DOWN	UP	YES
17507288	Shcbp1	Shc SH2-domain binding protein 1	0.970709	4.60961	3.37821	0.00249842	0.0534388	-1.70729	Shcbp1	mmu-miR-29b-3p	-0.802632	0.0418224	DOWN	UP	YES
17507288	Shcbp1	Shc SH2-domain binding protein 1	0.970709	4.60961	3.37821	0.00249842	0.0534388	-1.70729	Shcbp1	mmu-miR-29c-3p	-0.802632	0.0418224	DOWN	UP	YES
17317637	Sla	src-like adaptor	0.949708	8.10934	6.30861	1.63796e-06	0.000391454	5.25438	Sla	mmu-miR-181b-5p	-1.18269	0.0379446	DOWN	UP	YES
17317637	Sla	src-like adaptor	0.949708	8.10934	6.30861	1.63796e-06	0.000391454	5.25438	Sla	mmu-miR-23b-3p	-1.06605	0.0198663	DOWN	UP	YES
17404122	Slc10a5	solute carrier family 10 (sodium/bile acid cotransporter family), member 5	-1.15011	5.42403	-4.63994	0.000104841	0.0068048	1.2913	Slc10a5	mmu-miR-705	0.697022	0.0312337	UP	DOWN	YES
17401335	Slc16a1	solute carrier family 16 (monocarboxylic acid transporters), member 1	0.698892	7.85073	2.40748	0.0241521	0.205382	-3.78682	Slc16a1	mmu-miR-29b-3p	-0.802632	0.0418224	DOWN	UP	YES
17401335	Slc16a1	solute carrier family 16 (monocarboxylic acid transporters), member 1	0.698892	7.85073	2.40748	0.0241521	0.205382	-3.78682	Slc16a1	mmu-miR-29c-3p	-0.802632	0.0418224	DOWN	UP	YES
17401335	Slc16a1	solute carrier family 16 (monocarboxylic acid transporters), member 1	0.698892	7.85073	2.40748	0.0241521	0.205382	-3.78682	Slc16a1	mmu-miR-30d-5p	-0.962649	0.00493363	DOWN	UP	YES
17259534	Slc16a3	solute carrier family 16 (monocarboxylic acid transporters), member 3	0.506744	6.66009	4.93945	4.90662e-05	0.00419872	2.01494	Slc16a3	mmu-let-7b-5p	-0.818467	0.041336	DOWN	UP	YES
17259534	Slc16a3	solute carrier family 16 (monocarboxylic acid transporters), member 3	0.506744	6.66009	4.93945	4.90662e-05	0.00419872	2.01494	Slc16a3	mmu-let-7c-5p	-1.47774	0.00234926	DOWN	UP	YES
17259534	Slc16a3	solute carrier family 16 (monocarboxylic acid transporters), member 3	0.506744	6.66009	4.93945	4.90662e-05	0.00419872	2.01494	Slc16a3	mmu-miR-29b-3p	-0.802632	0.0418224	DOWN	UP	YES
17259534	Slc16a3	solute carrier family 16 (monocarboxylic acid transporters), member 3	0.506744	6.66009	4.93945	4.90662e-05	0.00419872	2.01494	Slc16a3	mmu-miR-29c-3p	-0.802632	0.0418224	DOWN	UP	YES
17271244	Slc16a6	solute carrier family 16 (monocarboxylic acid transporters), member 6	0.707715	6.668	4.46119	0.000165046	0.00917179	0.859358	Slc16a6	mmu-let-7b-5p	-0.818467	0.041336	DOWN	UP	YES
17271244	Slc16a6	solute carrier family 16 (monocarboxylic acid transporters), member 6	0.707715	6.668	4.46119	0.000165046	0.00917179	0.859358	Slc16a6	mmu-let-7c-5p	-1.47774	0.00234926	DOWN	UP	YES
17271244	Slc16a6	solute carrier family 16 (monocarboxylic acid transporters), member 6	0.707715	6.668	4.46119	0.000165046	0.00917179	0.859358	Slc16a6	mmu-miR-181b-5p	-1.18269	0.0379446	DOWN	UP	YES
17271244	Slc16a6	solute carrier family 16 (monocarboxylic acid transporters), member 6	0.707715	6.668	4.46119	0.000165046	0.00917179	0.859358	Slc16a6	mmu-miR-23b-3p	-1.06605	0.0198663	DOWN	UP	YES
17271244	Slc16a6	solute carrier family 16 (monocarboxylic acid transporters), member 6	0.707715	6.668	4.46119	0.000165046	0.00917179	0.859358	Slc16a6	mmu-miR-30d-5p	-0.962649	0.00493363	DOWN	UP	YES
17218889	Slc19a2	solute carrier family 19 (thiamine transporter), member 2	0.576713	7.02861	4.27519	0.00026458	0.0126171	0.410769	Slc19a2	mmu-let-7b-5p	-0.818467	0.041336	DOWN	UP	YES
17218889	Slc19a2	solute carrier family 19 (thiamine transporter), member 2	0.576713	7.02861	4.27519	0.00026458	0.0126171	0.410769	Slc19a2	mmu-let-7c-5p	-1.47774	0.00234926	DOWN	UP	YES
17218889	Slc19a2	solute carrier family 19 (thiamine transporter), member 2	0.576713	7.02861	4.27519	0.00026458	0.0126171	0.410769	Slc19a2	mmu-miR-181b-5p	-1.18269	0.0379446	DOWN	UP	YES
17346461	Slc25a23	solute carrier family 25 (mitochondrial carrier; phosphate carrier), member 23	-0.510869	8.86987	-2.32904	0.0286446	0.22494	-3.93843	Slc25a23	mmu-miR-133a-3p	0.967884	0.0235242	UP	DOWN	YES
17401833	Slc25a24	solute carrier family 25 (mitochondrial carrier, phosphate carrier), member 24	0.541416	8.33467	2.55523	0.017406	0.171549	-3.49322	Slc25a24	mmu-let-7b-5p	-0.818467	0.041336	DOWN	UP	YES
17401833	Slc25a24	solute carrier family 25 (mitochondrial carrier, phosphate carrier), member 24	0.541416	8.33467	2.55523	0.017406	0.171549	-3.49322	Slc25a24	mmu-miR-29b-3p	-0.802632	0.0418224	DOWN	UP	YES
17241130	Slc29a3	solute carrier family 29 (nucleoside transporters), member 3	1.06334	8.2397	5.21064	2.47437e-05	0.00260312	2.66789	Slc29a3	mmu-let-7b-5p	-0.818467	0.041336	DOWN	UP	YES
17390823	Slc30a4	solute carrier family 30 (zinc transporter), member 4	0.585461	7.45392	2.23533	0.0350093	0.251034	-4.11549	Slc30a4	mmu-let-7b-5p	-0.818467	0.041336	DOWN	UP	YES
17390823	Slc30a4	solute carrier family 30 (zinc transporter), member 4	0.585461	7.45392	2.23533	0.0350093	0.251034	-4.11549	Slc30a4	mmu-let-7c-5p	-1.47774	0.00234926	DOWN	UP	YES
17390823	Slc30a4	solute carrier family 30 (zinc transporter), member 4	0.585461	7.45392	2.23533	0.0350093	0.251034	-4.11549	Slc30a4	mmu-miR-5101	-0.666545	0.00398603	DOWN	UP	YES
17249811	Slc36a1	solute carrier family 36 (proton/amino acid symporter), member 1	0.555495	8.09633	3.59936	0.00144766	0.0381962	-1.19591	Slc36a1	mmu-miR-181b-5p	-1.18269	0.0379446	DOWN	UP	YES
17249811	Slc36a1	solute carrier family 36 (proton/amino acid symporter), member 1	0.555495	8.09633	3.59936	0.00144766	0.0381962	-1.19591	Slc36a1	mmu-miR-23b-3p	-1.06605	0.0198663	DOWN	UP	YES
17249811	Slc36a1	solute carrier family 36 (proton/amino acid symporter), member 1	0.555495	8.09633	3.59936	0.00144766	0.0381962	-1.19591	Slc36a1	mmu-miR-30d-5p	-0.962649	0.00493363	DOWN	UP	YES
17514853	Slc36a4	solute carrier family 36 (proton/amino acid symporter), member 4	0.539645	7.73358	2.49577	0.0198769	0.184336	-3.61257	Slc36a4	mmu-miR-29b-3p	-0.802632	0.0418224	DOWN	UP	YES
17399672	Slc39a1	solute carrier family 39 (zinc transporter), member 1	0.743159	8.59855	4.34366	0.000222404	0.0112047	0.575746	Slc39a1	mmu-let-7b-5p	-0.818467	0.041336	DOWN	UP	YES
17399672	Slc39a1	solute carrier family 39 (zinc transporter), member 1	0.743159	8.59855	4.34366	0.000222404	0.0112047	0.575746	Slc39a1	mmu-let-7c-5p	-1.47774	0.00234926	DOWN	UP	YES
17308299	Slc39a14	solute carrier family 39 (zinc transporter), member 14	0.652832	7.67083	4.60213	0.000115403	0.007197	1.1999	Slc39a14	mmu-miR-181b-5p	-1.18269	0.0379446	DOWN	UP	YES
17308299	Slc39a14	solute carrier family 39 (zinc transporter), member 14	0.652832	7.67083	4.60213	0.000115403	0.007197	1.1999	Slc39a14	mmu-miR-29b-3p	-0.802632	0.0418224	DOWN	UP	YES
17503866	Slc6a2	solute carrier family 6 (neurotransmitter transporter, noradrenalin), member 2	0.635695	7.23083	2.40063	0.0245166	0.206865	-3.80017	Slc6a2	mmu-miR-3064-5p	-0.505052	0.0268297	DOWN	UP	YES
17476732	Slc7a10	solute carrier family 7 (cationic amino acid transporter, y+ system), member 10	-1.34492	7.61666	-5.68752	7.50916e-06	0.00118439	3.80507	Slc7a10	mmu-miR-692	0.6296	0.0221784	UP	DOWN	YES
17405082	Slc7a11	solute carrier family 7 (cationic amino acid transporter, y+ system), member 11	1.77288	5.10685	7.08681	2.58406e-07	0.000120728	7.00362	Slc7a11	mmu-let-7b-5p	-0.818467	0.041336	DOWN	UP	YES
17405082	Slc7a11	solute carrier family 7 (cationic amino acid transporter, y+ system), member 11	1.77288	5.10685	7.08681	2.58406e-07	0.000120728	7.00362	Slc7a11	mmu-let-7c-5p	-1.47774	0.00234926	DOWN	UP	YES
17405082	Slc7a11	solute carrier family 7 (cationic amino acid transporter, y+ system), member 11	1.77288	5.10685	7.08681	2.58406e-07	0.000120728	7.00362	Slc7a11	mmu-miR-30d-5p	-0.962649	0.00493363	DOWN	UP	YES
17404570	Slc7a14	solute carrier family 7 (cationic amino acid transporter, y+ system), member 14	0.520627	5.24953	3.22682	0.00361319	0.0673826	-2.05122	Slc7a14	mmu-miR-30d-5p	-0.962649	0.00493363	DOWN	UP	YES
17404570	Slc7a14	solute carrier family 7 (cationic amino acid transporter, y+ system), member 14	0.520627	5.24953	3.22682	0.00361319	0.0673826	-2.05122	Slc7a14	mmu-miR-5101	-0.666545	0.00398603	DOWN	UP	YES
17404570	Slc7a14	solute carrier family 7 (cationic amino acid transporter, y+ system), member 14	0.520627	5.24953	3.22682	0.00361319	0.0673826	-2.05122	Slc7a14	mmu-miR-674-5p	-0.546437	0.0466459	DOWN	UP	YES
17513641	Slc7a5	solute carrier family 7 (cationic amino acid transporter, y+ system), member 5	0.939235	7.78006	5.51191	1.16259e-05	0.00155896	3.38833	Slc7a5	mmu-miR-30d-5p	-0.962649	0.00493363	DOWN	UP	YES
17380766	Slco4a1	solute carrier organic anion transporter family, member 4a1	0.528668	6.29537	2.43351	0.0228107	0.198561	-3.73583	Slco4a1	mmu-miR-29b-3p	-0.802632	0.0418224	DOWN	UP	YES
17380766	Slco4a1	solute carrier organic anion transporter family, member 4a1	0.528668	6.29537	2.43351	0.0228107	0.198561	-3.73583	Slco4a1	mmu-miR-29c-3p	-0.802632	0.0418224	DOWN	UP	YES
17254171	Slfn1	schlafen 1	0.732412	7.65826	3.82307	0.000828193	0.0269337	-0.669939	Slfn1	mmu-let-7b-5p	-0.818467	0.041336	DOWN	UP	YES
17254171	Slfn1	schlafen 1	0.732412	7.65826	3.82307	0.000828193	0.0269337	-0.669939	Slfn1	mmu-let-7c-5p	-1.47774	0.00234926	DOWN	UP	YES
17358375	Smarca2	SWI/SNF related, matrix associated, actin dependent regulator of chromatin, subfamily a, member 2	-0.795534	10.1415	-4.33557	0.000227014	0.0113879	0.556246	Smarca2	mmu-miR-133a-3p	0.967884	0.0235242	UP	DOWN	YES
17414114	Smc2	structural maintenance of chromosomes 2	0.783775	6.61082	4.10686	0.000405189	0.0165311	0.00635254	Smc2	mmu-miR-23b-3p	-1.06605	0.0198663	DOWN	UP	YES
17414114	Smc2	structural maintenance of chromosomes 2	0.783775	6.61082	4.10686	0.000405189	0.0165311	0.00635254	Smc2	mmu-miR-29b-3p	-0.802632	0.0418224	DOWN	UP	YES
17414114	Smc2	structural maintenance of chromosomes 2	0.783775	6.61082	4.10686	0.000405189	0.0165311	0.00635254	Smc2	mmu-miR-29c-3p	-0.802632	0.0418224	DOWN	UP	YES
17414114	Smc2	structural maintenance of chromosomes 2	0.783775	6.61082	4.10686	0.000405189	0.0165311	0.00635254	Smc2	mmu-miR-30d-5p	-0.962649	0.00493363	DOWN	UP	YES
17430894	Smpdl3b	sphingomyelin phosphodiesterase, acid-like 3B	0.55636	6.54011	3.88351	0.00071159	0.0240169	-0.526638	Smpdl3b	mmu-let-7c-5p	-1.47774	0.00234926	DOWN	UP	YES
17323192	Snai2	snail family zinc finger 2	-0.744029	8.80254	-2.91019	0.00769664	0.107075	-2.7504	Snai2	mmu-miR-692	0.6296	0.0221784	UP	DOWN	YES
17528329	Snx1	sorting nexin 1	0.637089	8.56826	3.84737	0.000779203	0.0257778	-0.612375	Snx1	mmu-miR-29b-3p	-0.802632	0.0418224	DOWN	UP	YES
17458573	Snx10	sorting nexin 10	0.740495	7.42514	4.63468	0.00010625	0.00684253	1.27859	Snx10	mmu-miR-30d-5p	-0.962649	0.00493363	DOWN	UP	YES
17392375	Snx5	sorting nexin 5	0.759003	7.79107	5.08469	3.39902e-05	0.00327582	2.36504	Snx5	mmu-let-7b-5p	-0.818467	0.041336	DOWN	UP	YES
17392375	Snx5	sorting nexin 5	0.759003	7.79107	5.08469	3.39902e-05	0.00327582	2.36504	Snx5	mmu-let-7c-5p	-1.47774	0.00234926	DOWN	UP	YES
17392375	Snx5	sorting nexin 5	0.759003	7.79107	5.08469	3.39902e-05	0.00327582	2.36504	Snx5	mmu-miR-23b-3p	-1.06605	0.0198663	DOWN	UP	YES
17392375	Snx5	sorting nexin 5	0.759003	7.79107	5.08469	3.39902e-05	0.00327582	2.36504	Snx5	mmu-miR-30d-5p	-0.962649	0.00493363	DOWN	UP	YES
17272619	Socs3	suppressor of cytokine signaling 3	1.06345	7.24342	7.02376	2.99283e-07	0.00013088	6.86496	Socs3	mmu-miR-30d-5p	-0.962649	0.00493363	DOWN	UP	YES
17280350	Sox11	SRY (sex determining region Y)-box 11	-0.774545	6.25656	-4.1338	0.0003785	0.0157594	0.0709529	Sox11	mmu-miR-133a-3p	0.967884	0.0235242	UP	DOWN	YES
17386161	Spc25	SPC25, NDC80 kinetochore complex component, homolog (S. cerevisiae)	0.740621	5.28648	3.44457	0.00212267	0.0482431	-1.55487	Spc25	mmu-let-7b-5p	-0.818467	0.041336	DOWN	UP	YES
17509379	Spcs3	signal peptidase complex subunit 3 homolog (S. cerevisiae)	0.835508	8.22259	3.04163	0.00563893	0.0883607	-2.46382	Spcs3	mmu-let-7b-5p	-0.818467	0.041336	DOWN	UP	YES
17509379	Spcs3	signal peptidase complex subunit 3 homolog (S. cerevisiae)	0.835508	8.22259	3.04163	0.00563893	0.0883607	-2.46382	Spcs3	mmu-let-7c-5p	-1.47774	0.00234926	DOWN	UP	YES
17509379	Spcs3	signal peptidase complex subunit 3 homolog (S. cerevisiae)	0.835508	8.22259	3.04163	0.00563893	0.0883607	-2.46382	Spcs3	mmu-miR-181b-5p	-1.18269	0.0379446	DOWN	UP	YES
17509379	Spcs3	signal peptidase complex subunit 3 homolog (S. cerevisiae)	0.835508	8.22259	3.04163	0.00563893	0.0883607	-2.46382	Spcs3	mmu-miR-23b-3p	-1.06605	0.0198663	DOWN	UP	YES
17509379	Spcs3	signal peptidase complex subunit 3 homolog (S. cerevisiae)	0.835508	8.22259	3.04163	0.00563893	0.0883607	-2.46382	Spcs3	mmu-miR-30d-5p	-0.962649	0.00493363	DOWN	UP	YES
17446434	Speer4b	spermatogenesis associated glutamate (E)-rich protein 4B	0.5471	5.74133	1.5541	0.133311	0.495857	-5.245	Speer4b	mmu-miR-3064-5p	-0.505052	0.0268297	DOWN	UP	YES
17439830	Spp1	secreted phosphoprotein 1	3.30963	9.61413	14.6644	1.92482e-13	7.95816e-09	19.5822	Spp1	mmu-miR-181b-5p	-1.18269	0.0379446	DOWN	UP	YES
17439830	Spp1	secreted phosphoprotein 1	3.30963	9.61413	14.6644	1.92482e-13	7.95816e-09	19.5822	Spp1	mmu-miR-23b-3p	-1.06605	0.0198663	DOWN	UP	YES
17397170	Spry1	sprouty RTK signaling antagonist 1	-0.812017	9.11315	-4.33519	0.000227235	0.0113879	0.555323	Spry1	mmu-miR-133a-3p	0.967884	0.0235242	UP	DOWN	YES
17550460	Sra1	steroid receptor RNA activator 1	0.53907	8.02465	3.28419	0.00314336	0.0619752	-1.92155	Sra1	mmu-let-7b-5p	-0.818467	0.041336	DOWN	UP	YES
17550460	Sra1	steroid receptor RNA activator 1	0.53907	8.02465	3.28419	0.00314336	0.0619752	-1.92155	Sra1	mmu-let-7c-5p	-1.47774	0.00234926	DOWN	UP	YES
17334147	Srrm2	serine/arginine repetitive matrix 2	-0.5158	10.4484	-1.59341	0.124215	0.480869	-5.1883	Srrm2	mmu-miR-133a-3p	0.967884	0.0235242	UP	DOWN	YES
17377666	Srxn1	sulfiredoxin 1 homolog (S. cerevisiae)	0.701663	7.55695	5.1949	2.57443e-05	0.00267345	2.63008	Srxn1	mmu-let-7b-5p	-0.818467	0.041336	DOWN	UP	YES
17375111	Stard9	START domain containing 9	-0.735024	9.19859	-4.30849	0.000243155	0.0119397	0.49098	Stard9	mmu-miR-133a-3p	0.967884	0.0235242	UP	DOWN	YES
17375127	Stard9	START domain containing 9	-0.716488	8.14556	-3.89712	0.000687651	0.0235242	-0.494301	Stard9	mmu-miR-133a-3p	0.967884	0.0235242	UP	DOWN	YES
17434490	Steap4	STEAP family member 4	0.557883	7.3026	1.74588	0.0936831	0.421296	-4.95785	Steap4	mmu-let-7c-5p	-1.47774	0.00234926	DOWN	UP	YES
17434490	Steap4	STEAP family member 4	0.557883	7.3026	1.74588	0.0936831	0.421296	-4.95785	Steap4	mmu-miR-297a-5p	-1.26548	0.0305066	DOWN	UP	YES
17276396	Syne2	spectrin repeat containing, nuclear envelope 2	-0.666545	8.42642	-4.97429	4.49266e-05	0.00398603	2.09899	Syne2	mmu-miR-133a-3p	0.967884	0.0235242	UP	DOWN	YES
17406831	Syt11	synaptotagmin XI	0.510369	6.45684	4.3435	0.000222494	0.0112047	0.575358	Syt11	mmu-let-7b-5p	-0.818467	0.041336	DOWN	UP	YES
17526576	Tagln	transgelin	0.732936	8.32946	2.83581	0.00915981	0.118566	-2.91	Tagln	mmu-let-7b-5p	-0.818467	0.041336	DOWN	UP	YES
17526576	Tagln	transgelin	0.732936	8.32946	2.83581	0.00915981	0.118566	-2.91	Tagln	mmu-miR-23b-3p	-1.06605	0.0198663	DOWN	UP	YES
17526576	Tagln	transgelin	0.732936	8.32946	2.83581	0.00915981	0.118566	-2.91	Tagln	mmu-miR-30d-5p	-0.962649	0.00493363	DOWN	UP	YES
17371101	Tank	TRAF family member-associated Nf-kappa B activator	0.588779	7.21981	2.48271	0.0204615	0.186957	-3.63857	Tank	mmu-let-7c-5p	-1.47774	0.00234926	DOWN	UP	YES
17441595	Tbx3	T-box 3	-1.05326	9.36504	-6.89972	4.00104e-07	0.000159061	6.59058	Tbx3	mmu-miR-692	0.6296	0.0221784	UP	DOWN	YES
17361008	Tcirg1	T cell, immune regulator 1, ATPase, H+ transporting, lysosomal V0 protein A3	0.704626	8.01945	5.36189	1.69214e-05	0.00197938	3.03036	Tcirg1	mmu-miR-29b-3p	-0.802632	0.0418224	DOWN	UP	YES
17313376	Tef	thyrotroph embryonic factor	-0.742194	7.5442	-3.93425	0.000626323	0.0222851	-0.405993	Tef	mmu-miR-133a-3p	0.967884	0.0235242	UP	DOWN	YES
17456131	Tes	testis derived transcript	0.601394	7.17316	4.18441	0.000332996	0.0145845	0.192445	Tes	mmu-miR-23b-3p	-1.06605	0.0198663	DOWN	UP	YES
17499310	Tfdp1	transcription factor Dp 1	0.611719	8.02673	3.77031	0.000945241	0.029354	-0.794652	Tfdp1	mmu-miR-30d-5p	-0.962649	0.00493363	DOWN	UP	YES
17413915	Tgfbr1	transforming growth factor, beta receptor I	0.795437	7.75891	5.5149	1.15393e-05	0.00155405	3.39546	Tgfbr1	mmu-let-7b-5p	-0.818467	0.041336	DOWN	UP	YES
17413915	Tgfbr1	transforming growth factor, beta receptor I	0.795437	7.75891	5.5149	1.15393e-05	0.00155405	3.39546	Tgfbr1	mmu-let-7c-5p	-1.47774	0.00234926	DOWN	UP	YES
17413915	Tgfbr1	transforming growth factor, beta receptor I	0.795437	7.75891	5.5149	1.15393e-05	0.00155405	3.39546	Tgfbr1	mmu-miR-297a-5p	-1.26548	0.0305066	DOWN	UP	YES
17450618	Tgfbr3	transforming growth factor, beta receptor III	-0.807476	8.48817	-3.92201	0.000645928	0.0226898	-0.435136	Tgfbr3	mmu-miR-133a-3p	0.967884	0.0235242	UP	DOWN	YES
17374488	Thbs1	thrombospondin 1	1.51098	9.67917	3.81279	0.000849829	0.0273008	-0.694277	Thbs1	mmu-let-7b-5p	-0.818467	0.041336	DOWN	UP	YES
17374488	Thbs1	thrombospondin 1	1.51098	9.67917	3.81279	0.000849829	0.0273008	-0.694277	Thbs1	mmu-let-7c-5p	-1.47774	0.00234926	DOWN	UP	YES
17517116	Timm8b	translocase of inner mitochondrial membrane 8B	0.523324	8.55959	2.58009	0.0164601	0.166167	-3.44285	Timm8b	mmu-miR-181b-5p	-1.18269	0.0379446	DOWN	UP	YES
17517116	Timm8b	translocase of inner mitochondrial membrane 8B	0.523324	8.55959	2.58009	0.0164601	0.166167	-3.44285	Timm8b	mmu-miR-23b-3p	-1.06605	0.0198663	DOWN	UP	YES
17517116	Timm8b	translocase of inner mitochondrial membrane 8B	0.523324	8.55959	2.58009	0.0164601	0.166167	-3.44285	Timm8b	mmu-miR-29b-3p	-0.802632	0.0418224	DOWN	UP	YES
17517116	Timm8b	translocase of inner mitochondrial membrane 8B	0.523324	8.55959	2.58009	0.0164601	0.166167	-3.44285	Timm8b	mmu-miR-29c-3p	-0.802632	0.0418224	DOWN	UP	YES
17272594	Tk1	thymidine kinase 1	0.58497	6.94097	3.85905	0.000756681	0.0251487	-0.584677	Tk1	mmu-let-7b-5p	-0.818467	0.041336	DOWN	UP	YES
17298183	Tkt	transketolase	0.501068	8.1587	3.83986	0.00079403	0.0261171	-0.630173	Tkt	mmu-let-7b-5p	-0.818467	0.041336	DOWN	UP	YES
17492943	Tlnrd1	talin rod domain containing 1	-0.52163	7.35573	-3.62998	0.00134157	0.0368554	-1.12437	Tlnrd1	mmu-miR-133a-3p	0.967884	0.0235242	UP	DOWN	YES
17448251	Tlr6	toll-like receptor 6	0.513778	6.01982	2.24897	0.0340092	0.246918	-4.09001	Tlr6	mmu-let-7b-5p	-0.818467	0.041336	DOWN	UP	YES
17479736	Tm6sf1	transmembrane 6 superfamily member 1	0.693372	9.04864	4.48176	0.000156647	0.0088478	0.909042	Tm6sf1	mmu-miR-297a-5p	-1.26548	0.0305066	DOWN	UP	YES
17286732	Tmem14c	transmembrane protein 14C	0.687055	8.60289	4.27598	0.00026405	0.0126064	0.412672	Tmem14c	mmu-miR-181b-5p	-1.18269	0.0379446	DOWN	UP	YES
17353663	Tmem173	transmembrane protein 173	1.24816	7.88256	4.84466	6.23774e-05	0.00487159	1.78609	Tmem173	mmu-let-7b-5p	-0.818467	0.041336	DOWN	UP	YES
17353663	Tmem173	transmembrane protein 173	1.24816	7.88256	4.84466	6.23774e-05	0.00487159	1.78609	Tmem173	mmu-let-7c-5p	-1.47774	0.00234926	DOWN	UP	YES
17245044	Tmem19	transmembrane protein 19	0.510461	7.40562	3.39831	0.00237825	0.0519346	-1.66122	Tmem19	mmu-miR-297a-5p	-1.26548	0.0305066	DOWN	UP	YES
17357478	Tmem258	transmembrane protein 258	0.569427	6.94028	3.72818	0.00105026	0.0312522	-0.893956	Tmem258	mmu-miR-30d-5p	-0.962649	0.00493363	DOWN	UP	YES
17478263	Tmem86a	transmembrane protein 86A	0.773229	8.08665	4.45216	0.000168871	0.0093093	0.83756	Tmem86a	mmu-miR-29b-3p	-0.802632	0.0418224	DOWN	UP	YES
17426365	Tnc	tenascin C	3.23276	7.3479	6.03759	3.16787e-06	0.0006452	4.62712	Tnc	mmu-miR-29b-3p	-0.802632	0.0418224	DOWN	UP	YES
17344309	Tnf	tumor necrosis factor	0.953433	6.3893	4.97634	4.46939e-05	0.00398603	2.10395	Tnf	mmu-miR-30d-5p	-0.962649	0.00493363	DOWN	UP	YES
17279131	Tnfaip2	tumor necrosis factor, alpha-induced protein 2	0.605782	7.89815	4.16206	0.000352378	0.0151296	0.138776	Tnfaip2	mmu-miR-29b-3p	-0.802632	0.0418224	DOWN	UP	YES
17432674	Tnfrsf1b	tumor necrosis factor receptor superfamily, member 1b	1.02983	8.36609	6.21608	2.04984e-06	0.000463119	5.04119	Tnfrsf1b	mmu-let-7b-5p	-0.818467	0.041336	DOWN	UP	YES
17432674	Tnfrsf1b	tumor necrosis factor receptor superfamily, member 1b	1.02983	8.36609	6.21608	2.04984e-06	0.000463119	5.04119	Tnfrsf1b	mmu-let-7c-5p	-1.47774	0.00234926	DOWN	UP	YES
17421981	Tnfrsf9	tumor necrosis factor receptor superfamily, member 9	0.745754	6.67971	3.82286	0.000828629	0.0269337	-0.670436	Tnfrsf9	mmu-miR-29b-3p	-0.802632	0.0418224	DOWN	UP	YES
17421981	Tnfrsf9	tumor necrosis factor receptor superfamily, member 9	0.745754	6.67971	3.82286	0.000828629	0.0269337	-0.670436	Tnfrsf9	mmu-miR-29c-3p	-0.802632	0.0418224	DOWN	UP	YES
17426356	Tnfsf8	tumor necrosis factor (ligand) superfamily, member 8	0.602542	5.21	3.19282	0.00392306	0.0708292	-2.1277	Tnfsf8	mmu-let-7b-5p	-0.818467	0.041336	DOWN	UP	YES
17426356	Tnfsf8	tumor necrosis factor (ligand) superfamily, member 8	0.602542	5.21	3.19282	0.00392306	0.0708292	-2.1277	Tnfsf8	mmu-let-7c-5p	-1.47774	0.00234926	DOWN	UP	YES
17426356	Tnfsf8	tumor necrosis factor (ligand) superfamily, member 8	0.602542	5.21	3.19282	0.00392306	0.0708292	-2.1277	Tnfsf8	mmu-miR-30d-5p	-0.962649	0.00493363	DOWN	UP	YES
17313169	Tnrc6b	trinucleotide repeat containing 6b	-0.602404	9.00208	-4.17588	0.000340269	0.0147933	0.171948	Tnrc6b	mmu-miR-133a-3p	0.967884	0.0235242	UP	DOWN	YES
17258789	Tnrc6c	trinucleotide repeat containing 6C	-0.50051	8.58124	-3.11639	0.00471571	0.0789037	-2.29842	Tnrc6c	mmu-miR-133a-3p	0.967884	0.0235242	UP	DOWN	YES
17258789	Tnrc6c	trinucleotide repeat containing 6C	-0.50051	8.58124	-3.11639	0.00471571	0.0789037	-2.29842	Tnrc6c	mmu-miR-692	0.6296	0.0221784	UP	DOWN	YES
17224211	Tns1	tensin 1	-0.80133	11.6359	-5.64556	8.33387e-06	0.00126678	3.70574	Tns1	mmu-miR-133a-3p	0.967884	0.0235242	UP	DOWN	YES
17268909	Top2a	topoisomerase (DNA) II alpha	1.59048	6.62088	4.96311	4.62143e-05	0.00406617	2.07204	Top2a	mmu-miR-23b-3p	-1.06605	0.0198663	DOWN	UP	YES
17268909	Top2a	topoisomerase (DNA) II alpha	1.59048	6.62088	4.96311	4.62143e-05	0.00406617	2.07204	Top2a	mmu-miR-29b-3p	-0.802632	0.0418224	DOWN	UP	YES
17268909	Top2a	topoisomerase (DNA) II alpha	1.59048	6.62088	4.96311	4.62143e-05	0.00406617	2.07204	Top2a	mmu-miR-29c-3p	-0.802632	0.0418224	DOWN	UP	YES
17494394	Trim30a	tripartite motif-containing 30A	0.794649	6.38712	3.75996	0.000970031	0.0298185	-0.81906	Trim30a	mmu-miR-23b-3p	-1.06605	0.0198663	DOWN	UP	YES
17494408	Trim30d	tripartite motif-containing 30D	0.595032	6.40151	2.47479	0.0208239	0.188436	-3.6543	Trim30d	mmu-miR-23b-3p	-1.06605	0.0198663	DOWN	UP	YES
17294302	Trip13	thyroid hormone receptor interactor 13	0.546004	5.76714	3.13482	0.0045115	0.0766343	-2.2574	Trip13	mmu-let-7b-5p	-0.818467	0.041336	DOWN	UP	YES
17294302	Trip13	thyroid hormone receptor interactor 13	0.546004	5.76714	3.13482	0.0045115	0.0766343	-2.2574	Trip13	mmu-let-7c-5p	-1.47774	0.00234926	DOWN	UP	YES
17316977	Trps1	transcriptional repressor GATA binding 1	0.605336	5.94679	3.45231	0.00208264	0.0477873	-1.53705	Trps1	mmu-let-7b-5p	-0.818467	0.041336	DOWN	UP	YES
17316977	Trps1	transcriptional repressor GATA binding 1	0.605336	5.94679	3.45231	0.00208264	0.0477873	-1.53705	Trps1	mmu-let-7c-5p	-1.47774	0.00234926	DOWN	UP	YES
17250710	Trpv2	transient receptor potential cation channel, subfamily V, member 2	0.525973	6.92067	3.98898	0.000545659	0.0201792	-0.275566	Trpv2	mmu-let-7b-5p	-0.818467	0.041336	DOWN	UP	YES
17313654	Tspo	translocator protein	0.853687	8.51879	4.40557	0.000190072	0.0101147	0.725079	Tspo	mmu-miR-29b-3p	-0.802632	0.0418224	DOWN	UP	YES
17440592	Ttc28	tetratricopeptide repeat domain 28	-0.597058	7.63868	-2.79893	0.00997999	0.124434	-2.98842	Ttc28	mmu-miR-133a-3p	0.967884	0.0235242	UP	DOWN	YES
17348570	Ttc39c	tetratricopeptide repeat domain 39C	0.702341	6.9176	5.21162	2.46827e-05	0.00260312	2.67025	Ttc39c	mmu-miR-103-3p	-0.833679	0.0367714	DOWN	UP	YES
17519910	Ttk	Ttk protein kinase	0.559564	5.44963	3.12666	0.00460085	0.0775755	-2.27557	Ttk	mmu-miR-5101	-0.666545	0.00398603	DOWN	UP	YES
17386778	Ttn	titin	-1.08666	7.01097	-3.29324	0.00307486	0.0610806	-1.90102	Ttn	mmu-miR-133a-3p	0.967884	0.0235242	UP	DOWN	YES
17258023	Ttyh2	tweety family member 2	0.530306	7.62339	2.65752	0.0138129	0.149933	-3.28426	Ttyh2	mmu-miR-29b-3p	-0.802632	0.0418224	DOWN	UP	YES
17291767	Tubb2a	tubulin, beta 2A class IIA	0.571902	8.00575	2.4663	0.021219	0.190675	-3.67113	Tubb2a	mmu-miR-29b-3p	-0.802632	0.0418224	DOWN	UP	YES
17344444	Tubb5	tubulin, beta 5 class I	0.627703	10.6766	2.47946	0.0206098	0.187665	-3.64504	Tubb5	mmu-let-7b-5p	-0.818467	0.041336	DOWN	UP	YES
17344444	Tubb5	tubulin, beta 5 class I	0.627703	10.6766	2.47946	0.0206098	0.187665	-3.64504	Tubb5	mmu-let-7c-5p	-1.47774	0.00234926	DOWN	UP	YES
17344444	Tubb5	tubulin, beta 5 class I	0.627703	10.6766	2.47946	0.0206098	0.187665	-3.64504	Tubb5	mmu-miR-181b-5p	-1.18269	0.0379446	DOWN	UP	YES
17344444	Tubb5	tubulin, beta 5 class I	0.627703	10.6766	2.47946	0.0206098	0.187665	-3.64504	Tubb5	mmu-miR-29b-3p	-0.802632	0.0418224	DOWN	UP	YES
17344444	Tubb5	tubulin, beta 5 class I	0.627703	10.6766	2.47946	0.0206098	0.187665	-3.64504	Tubb5	mmu-miR-29c-3p	-0.802632	0.0418224	DOWN	UP	YES
17344444	Tubb5	tubulin, beta 5 class I	0.627703	10.6766	2.47946	0.0206098	0.187665	-3.64504	Tubb5	mmu-miR-30d-5p	-0.962649	0.00493363	DOWN	UP	YES
17351465	Tubb6	tubulin, beta 6 class V	1.00575	7.60228	4.9754	4.48003e-05	0.00398603	2.10168	Tubb6	mmu-miR-29b-3p	-0.802632	0.0418224	DOWN	UP	YES
17354969	Txnl1	thioredoxin-like 1	0.527025	8.65689	2.52363	0.0186811	0.1785	-3.55685	Txnl1	mmu-miR-30d-5p	-0.962649	0.00493363	DOWN	UP	YES
17379523	Ube2c	ubiquitin-conjugating enzyme E2C	1.20537	6.0547	4.65787	0.000100177	0.00661738	1.33465	Ube2c	mmu-miR-3064-5p	-0.505052	0.0268297	DOWN	UP	YES
17379523	Ube2c	ubiquitin-conjugating enzyme E2C	1.20537	6.0547	4.65787	0.000100177	0.00661738	1.33465	Ube2c	mmu-miR-5101	-0.666545	0.00398603	DOWN	UP	YES
17437876	Uchl1	ubiquitin carboxy-terminal hydrolase L1	0.744891	6.88111	5.22345	2.3959e-05	0.00254788	2.69863	Uchl1	mmu-miR-181b-5p	-1.18269	0.0379446	DOWN	UP	YES
17437876	Uchl1	ubiquitin carboxy-terminal hydrolase L1	0.744891	6.88111	5.22345	2.3959e-05	0.00254788	2.69863	Uchl1	mmu-miR-30d-5p	-0.962649	0.00493363	DOWN	UP	YES
17229391	Uck2	uridine-cytidine kinase 2	0.734109	8.16231	3.01015	0.00607739	0.0928909	-2.53295	Uck2	mmu-miR-297a-5p	-1.26548	0.0305066	DOWN	UP	YES
17356002	Unc93b1	unc-93 homolog B1, TLR signaling regulator	0.720507	9.00702	3.70724	0.00110665	0.032327	-0.943223	Unc93b1	mmu-miR-30d-5p	-0.962649	0.00493363	DOWN	UP	YES
17462437	Usp18	ubiquitin specific peptidase 18	0.580839	7.96233	2.74567	0.0112877	0.134106	-3.10076	Usp18	mmu-miR-23b-3p	-1.06605	0.0198663	DOWN	UP	YES
17462437	Usp18	ubiquitin specific peptidase 18	0.580839	7.96233	2.74567	0.0112877	0.134106	-3.10076	Usp18	mmu-miR-30d-5p	-0.962649	0.00493363	DOWN	UP	YES
17251518	Vamp2	vesicle-associated membrane protein 2	-0.734638	9.5111	-4.25426	0.000278992	0.0131095	0.360401	Vamp2	mmu-miR-133a-3p	0.967884	0.0235242	UP	DOWN	YES
17294738	Vcan	versican	1.05546	6.67554	4.65231	0.0001016	0.00664663	1.32121	Vcan	mmu-let-7b-5p	-0.818467	0.041336	DOWN	UP	YES
17294738	Vcan	versican	1.05546	6.67554	4.65231	0.0001016	0.00664663	1.32121	Vcan	mmu-let-7c-5p	-1.47774	0.00234926	DOWN	UP	YES
17325686	Zbtb20	zinc finger and BTB domain containing 20	-0.773932	9.43761	-3.94617	0.000607814	0.0217954	-0.377625	Zbtb20	mmu-miR-133a-3p	0.967884	0.0235242	UP	DOWN	YES
17251728	Zbtb4	zinc finger and BTB domain containing 4	-0.724809	9.08424	-5.32064	1.87662e-05	0.00214334	2.93166	Zbtb4	mmu-miR-133a-3p	0.967884	0.0235242	UP	DOWN	YES
17478277	Zdhhc13	zinc finger, DHHC domain containing 13	0.509417	7.42069	2.16264	0.0408023	0.272796	-4.24959	Zdhhc13	mmu-miR-29b-3p	-0.802632	0.0418224	DOWN	UP	YES
17478277	Zdhhc13	zinc finger, DHHC domain containing 13	0.509417	7.42069	2.16264	0.0408023	0.272796	-4.24959	Zdhhc13	mmu-miR-29c-3p	-0.802632	0.0418224	DOWN	UP	YES
17505313	Zfhx3	zinc finger homeobox 3	-0.61942	8.80077	-3.51009	0.00180597	0.0438707	-1.40349	Zfhx3	mmu-miR-133a-3p	0.967884	0.0235242	UP	DOWN	YES
17393883	Zhx3	zinc fingers and homeoboxes 3	-0.514998	7.53106	-3.24668	0.00344334	0.0654852	-2.00643	Zhx3	mmu-miR-133a-3p	0.967884	0.0235242	UP	DOWN	YES
17393883	Zhx3	zinc fingers and homeoboxes 3	-0.514998	7.53106	-3.24668	0.00344334	0.0654852	-2.00643	Zhx3	mmu-miR-692	0.6296	0.0221784	UP	DOWN	YES
17290921	Zkscan3	zinc finger with KRAB and SCAN domains 3	-0.57803	8.02105	-3.0297	0.00580142	0.0901248	-2.49006	Zkscan3	mmu-miR-133a-3p	0.967884	0.0235242	UP	DOWN	YES
17404585	Zmat3	zinc finger matrin type 3	0.673614	7.88551	5.01652	4.03767e-05	0.00370972	2.20082	Zmat3	mmu-miR-181b-5p	-1.18269	0.0379446	DOWN	UP	YES
17404585	Zmat3	zinc finger matrin type 3	0.673614	7.88551	5.01652	4.03767e-05	0.00370972	2.20082	Zmat3	mmu-miR-297a-5p	-1.26548	0.0305066	DOWN	UP	YES
