# Supplementary material for: Transcriptomic profile of the mice aging lung is associated with inflammation and apoptosis as important pathways
Source: Aging (Albany NY). 2021 May 12;13(9):12378–94. doi: 10.18632/aging.203039 (PMC8148450; doi:10.18632/aging.203039)
Supplement: Supplementary Table 9 [file aging-13-203039-s010.xlsx]

## Sheet: miRNA_enrichment
Supplementary Table 9. Hallmark inflammatory response.
Pathway	pval	padj	log2err	ES	NES	size	leadingEdge	miRNA
HALLMARK_INFLAMMATORY_RESPONSE	0.353646	0.374625	0.0617054	0.302207	1.14835	19	Msr1 Ccl2 Mmp14 Tnfrsf1b Cd14 Hif1a Rgs16 Il1a Tgfbr1	let-7b-5p
HALLMARK_EPITHELIAL_MESENCHYMAL_TRANSITION	0.374625	0.374625	0.0589694	0.301543	1.13563	18	Thbs1 Mmp14 Col1a1 Rgs4 Lama1 Vcan Glipr1 Sfrp1 Col1a2 Ccn2 Tagln	let-7b-5p
HALLMARK_INFLAMMATORY_RESPONSE	0.0869131	0.19031	0.148262	0.405489	1.52025	17	Ccl2 Cxcl10 Mmp14 Tnfrsf1b Hif1a Hbegf Myc Rgs16 Il1a Tgfbr1	let-7c-5p
HALLMARK_EPITHELIAL_MESENCHYMAL_TRANSITION	0.126873	0.19031	0.119888	0.408235	1.48383	15	Thbs1 Mmp14 Col1a1 Rgs4 Lama1 Vcan	let-7c-5p
HALLMARK_TNFA_SIGNALING_VIA_NFKB	0.427572	0.427572	0.052805	0.281866	1.07506	19	Ccl2 Cxcl10 Hbegf Myc Fosl1 Il1a Sat1 Litaf Ccn2 Bhlhe40 Slc16a6 Ccnd1	let-7c-5p
GO_nervous_system_process	0.0058374	0.691076	0.407018	0.516125	1.91256	17	Chl1 Ccl2 Slc7a11 Il1rn Gatm Col1a1 Rgs4 Tnfrsf1b Hif1a Igf1 Ctsc Il1a	let-7b-5p
GO_anatomical_structure_morphogenesis	0.024975	0.691076	0.287857	0.388531	1.65121	42	Chl1 Ccl2 Mmp13 Thbs1 Il1rn Ctsl B4galt6 Mki67 Mmp19 Mmp14 Itgb2 Col1a1 Cd53	let-7b-5p
GO_chemotaxis	0.024975	0.691076	0.287857	0.473778	1.77815	18	Chl1 Ccl2 Ch25h Thbs1 Il1rn Itgb2 Lama1	let-7b-5p
GO_taxis	0.024975	0.691076	0.287857	0.473778	1.77815	18	Chl1 Ccl2 Ch25h Thbs1 Il1rn Itgb2 Lama1	let-7b-5p
GO_positive_regulation_of_RNA_metabolic_process	0.030969	0.691076	0.257206	0.46632	1.75016	18	Ccna2 Tmem173 Col1a1 Ptprn Tnfrsf1b Il33 Hif1a Igf1 Fosl1 Atf3 Il1a Sfrp1 Tgfbr1	let-7b-5p
GO_response_to_endogenous_stimulus	0.037962	0.691076	0.231127	0.408318	1.63306	27	Ccl2 Mmp13 Thbs1 Il1rn Gatm Mmp14 Itgb2 Col1a1 Rgs4 Glrx	let-7b-5p
GO_proteolysis	0.044955	0.691076	0.2114	0.397713	1.60114	29	Mmp13 Thbs1 Ctsl Ctsb Mmp19 Mmp14 Tnfrsf1b Serpinb9b Birc5 Rnf149 Il33 Adam8 Igf1 Plat Ctsc Ctsa Spcs3	let-7b-5p
GO_positive_regulation_of_RNA_biosynthetic_process	0.045954	0.691076	0.208955	0.450975	1.67114	17	Ccna2 Tmem173 Col1a1 Ptprn Il33 Hif1a Igf1 Fosl1 Atf3 Il1a Sfrp1 Tgfbr1	let-7b-5p
GO_positive_regulation_of_nucleic_acid-templated_transcription	0.045954	0.691076	0.208955	0.450975	1.67114	17	Ccna2 Tmem173 Col1a1 Ptprn Il33 Hif1a Igf1 Fosl1 Atf3 Il1a Sfrp1 Tgfbr1	let-7b-5p
GO_positive_regulation_of_transcription,_DNA-templated	0.045954	0.691076	0.208955	0.450975	1.67114	17	Ccna2 Tmem173 Col1a1 Ptprn Il33 Hif1a Igf1 Fosl1 Atf3 Il1a Sfrp1 Tgfbr1	let-7b-5p
GO_tube_development	0.00113211	0.0536965	0.45506	0.510576	2.05252	27	Ccl2 Cxcl10 Slc7a11 Hmox1 Thbs1 Lgals3 Mmp14 Itgb2 Anxa1 Lama1 Vcan Hif1a Hbegf Igf1 Myc	let-7c-5p
GO_chemotaxis	0.00151867	0.0536965	0.45506	0.571739	2.16498	18	Chl1 Ccl2 Cxcl10 Thbs1 Lgals3 Itgb2 Anxa1 Lama1 Cxcl16 Hbegf	let-7c-5p
GO_taxis	0.00151867	0.0536965	0.45506	0.571739	2.16498	18	Chl1 Ccl2 Cxcl10 Thbs1 Lgals3 Itgb2 Anxa1 Lama1 Cxcl16 Hbegf	let-7c-5p
GO_cell_migration	0.0015739	0.0536965	0.45506	0.478385	1.99978	37	Gpnmb Chl1 Ccl2 Cxcl10 Hmox1 Thbs1 Lgals3 Mmp14 Itgb2 Anxa1 Col1a1 Lama1 Vcan Cxcl16 Hif1a Hbegf Igf1 Myc Plat Fscn1 Il1a Plxnc1	let-7c-5p
GO_cell_motility	0.0015739	0.0536965	0.45506	0.478385	1.99978	37	Gpnmb Chl1 Ccl2 Cxcl10 Hmox1 Thbs1 Lgals3 Mmp14 Itgb2 Anxa1 Col1a1 Lama1 Vcan Cxcl16 Hif1a Hbegf Igf1 Myc Plat Fscn1 Il1a Plxnc1	let-7c-5p
GO_localization_of_cell	0.0015739	0.0536965	0.45506	0.478385	1.99978	37	Gpnmb Chl1 Ccl2 Cxcl10 Hmox1 Thbs1 Lgals3 Mmp14 Itgb2 Anxa1 Col1a1 Lama1 Vcan Cxcl16 Hif1a Hbegf Igf1 Myc Plat Fscn1 Il1a Plxnc1	let-7c-5p
GO_locomotion	0.0015739	0.0536965	0.45506	0.478385	1.99978	37	Gpnmb Chl1 Ccl2 Cxcl10 Hmox1 Thbs1 Lgals3 Mmp14 Itgb2 Anxa1 Col1a1 Lama1 Vcan Cxcl16 Hif1a Hbegf Igf1 Myc Plat Fscn1 Il1a Plxnc1	let-7c-5p
GO_immune_effector_process	0.00159231	0.0536965	0.45506	0.580983	2.18476	17	Ccl2 Cxcl10 Hmox1 Lgals3 Tmem173 Itgb2 Anxa1 Tnfrsf1b Serpinb9b Fam49b	let-7c-5p
GO_positive_regulation_of_cellular_component_movement	0.00183161	0.0536965	0.45506	0.499533	2.00813	27	Gpnmb Ccl2 Cxcl10 Hmox1 Thbs1 Lgals3 Mmp14 Anxa1 Col1a1 Cxcl16 Hif1a Hbegf Igf1 Myc	let-7c-5p
GO_positive_regulation_of_cell_migration	0.00212741	0.0536965	0.431708	0.516827	2.06452	26	Gpnmb Ccl2 Cxcl10 Hmox1 Thbs1 Lgals3 Mmp14 Anxa1 Col1a1 Cxcl16 Hif1a Hbegf Igf1 Myc	let-7c-5p
GO_cellular_response_to_chemical_stimulus	0.0889111	1	0.146416	0.225831	2.21161	18	Nr1d1 Gsn Spry1 Tgfbr3 Sox11 Zbtb20 Vamp2	miR-133a-3p
GO_negative_regulation_of_cellular_metabolic_process	0.110889	1	0.129443	0.193033	2.08292	23	Tnrc6c Kmt2a Lats2 Rarg Zhx3 Dusp1 Ptprk Igf1r Hmbox1	miR-133a-3p
GO_negative_regulation_of_nitrogen_compound_metabolic_process	0.110889	1	0.129443	0.193033	2.08292	23	Tnrc6c Kmt2a Lats2 Rarg Zhx3 Dusp1 Ptprk Igf1r Hmbox1	miR-133a-3p
GO_negative_regulation_of_macromolecule_metabolic_process	0.127872	1	0.119348	0.174305	1.93155	24	Tnrc6c Kmt2a Lats2 Rarg Zhx3 Dusp1 Ptprk Igf1r Hmbox1	miR-133a-3p
GO_negative_regulation_of_metabolic_process	0.127872	1	0.119348	0.174305	1.93155	24	Tnrc6c Kmt2a Lats2 Rarg Zhx3 Dusp1 Ptprk Igf1r Hmbox1	miR-133a-3p
GO_response_to_chemical	0.15984	1	0.104733	0.166304	1.76725	22	Nr1d1 Ttn Gsn Spry1 Tgfbr3 Sox11 Zbtb20 Vamp2 Per1 Gabbr1 Cited2 Zfhx3	miR-133a-3p
GO_cell_cycle	0.227772	1	0.0840746	0.162889	1.51155	16	Mtus1 Lats2 Dusp1 Ptprk Igf1r Pogz Mecom Eya1 Ttc28 Kmt2e Ctdspl Cited2 Syne2	miR-133a-3p
GO_nucleic_acid_metabolic_process	0.274725	1	0.0741759	0.122946	1.41349	28	Tnrc6c Kmt2a Rarg Zhx3 Srrm2 Dusp1 Ptprk Igf1r Hmbox1 Dyrk1b	miR-133a-3p
GO_heterocycle_metabolic_process	0.306693	1	0.0686326	0.109426	1.25792	29	Tnrc6c Kmt2a Rarg Zhx3 Srrm2 Dusp1 Ptprk Igf1r Hmbox1 Dyrk1b	miR-133a-3p
GO_nucleobase-containing_compound_metabolic_process	0.306693	1	0.0686326	0.109426	1.25792	29	Tnrc6c Kmt2a Rarg Zhx3 Srrm2 Dusp1 Ptprk Igf1r Hmbox1 Dyrk1b	miR-133a-3p
GO_regulation_of_cellular_process	0.00312634	0.148851	0.431708	0.504859	2.00144	57	Spp1 Chl1 Ccna2 Mki67 Ccng1 Nusap1 Il6 Rgs5 Psap Hif1a Sec24a E2f8 Sla Sgpl1 Ctsc Sdcbp Plxnc1 Sfrp1 Abcd2 Rab8b Hells Axl Nabp1 Id2 Uchl1 Atad2 Bhlhe40	miR-181b-5p
GO_negative_regulation_of_cellular_process	0.00382967	0.148851	0.431708	0.480909	1.97298	36	Spp1 Chl1 Ccng1 Il6 Rgs5 Psap Hif1a E2f8 Ctsc Sdcbp Plxnc1 Sfrp1 Abcd2 Hells Axl Nabp1 Id2 Uchl1 Atad2 Bhlhe40	miR-181b-5p
GO_anatomical_structure_morphogenesis	0.00435019	0.148851	0.407018	0.536145	2.08155	20	Chl1 B4galt6 Mki67 Ccng1 Il6 Hif1a E2f8 Sgpl1 Plxnc1 Sfrp1 Axl Id2 Uchl1	miR-181b-5p
GO_regulation_of_cell_communication	0.00769716	0.148851	0.407018	0.495084	1.97193	22	Spp1 Il6 Rgs5 Psap Hif1a Sla Ctsc Sdcbp Sfrp1 Rab8b Hells Axl	miR-181b-5p
GO_regulation_of_signaling	0.00769716	0.148851	0.407018	0.495084	1.97193	22	Spp1 Il6 Rgs5 Psap Hif1a Sla Ctsc Sdcbp Sfrp1 Rab8b Hells Axl	miR-181b-5p
GO_negative_regulation_of_biological_process	0.0100884	0.148851	0.38073	0.448938	1.84158	38	Spp1 Chl1 Ccng1 Il6 Rgs5 Psap Hif1a E2f8 Ctsc Sdcbp Plxnc1 Sfrp1 Abcd2 Hells Axl Nabp1 Id2 Uchl1 Atad2 Bhlhe40	miR-181b-5p
GO_developmental_process	0.011583	0.148851	0.38073	0.45674	1.8805	41	Spp1 Chl1 B4galt6 Mki67 Ccng1 Il6 Psap Hif1a E2f8 Sla Sgpl1 Ctsc Sdcbp Plxnc1 Sfrp1 Abcd2 Hells Axl	miR-181b-5p
GO_regulation_of_biological_process	0.0127786	0.148851	0.38073	0.470091	1.82215	60	Spp1 Chl1 Ccna2 Mki67 Ccng1 Nusap1 Il6 Rgs5 Psap Hif1a Sec24a E2f8 Sla Sgpl1 Ctsc Sdcbp Plxnc1 Sfrp1 Abcd2 Rab8b Hells Axl Nabp1 Id2 Uchl1 Atad2 Bhlhe40	miR-181b-5p
GO_organic_substance_catabolic_process	0.017982	0.148851	0.341793	0.511161	1.87856	15	Spp1 Il6 Psap Hif1a Sgpl1 Ctsc Sdcbp Abcd2	miR-181b-5p
GO_positive_regulation_of_cellular_metabolic_process	0.020979	0.148851	0.315325	0.470635	1.84672	21	Spp1 Ccna2 Il6 Psap Hif1a E2f8 Ctsc Sdcbp Sfrp1 Abcd2	miR-181b-5p
GO_regulation_of_biological_process	0.000718971	0.0277775	0.477271	0.477954	2.06827	92	Tnc Ctss Ccna2 Eif2s3y Top2a Fn1 Lox Cdkn1a Mki67 Lpl Pdgfc Col8a1 Col1a1 Ifi30 Cd53 Sh3pxd2b Col5a2 Depdc1a Has2 Eda2r Kif11 Hif1a Hbegf Kif20b Eef1e1 Shcbp1 Igf1 Il2ra Arhgap11a Fbn1 Cideb Ctsc Ctsa Bst2 Grn Col3a1 Fscn1 Tspo	miR-29b-3p
GO_regulation_of_cellular_process	0.000718971	0.0277775	0.477271	0.477954	2.06827	92	Tnc Ctss Ccna2 Eif2s3y Top2a Fn1 Lox Cdkn1a Mki67 Lpl Pdgfc Col8a1 Col1a1 Ifi30 Cd53 Sh3pxd2b Col5a2 Depdc1a Has2 Eda2r Kif11 Hif1a Hbegf Kif20b Eef1e1 Shcbp1 Igf1 Il2ra Arhgap11a Fbn1 Cideb Ctsc Ctsa Bst2 Grn Col3a1 Fscn1 Tspo	miR-29b-3p
GO_cellular_component_organization	0.000883829	0.0277775	0.477271	0.450761	1.98717	67	Tnc Ctss Ccna2 Eif2s3y Top2a Fn1 Lox Cdkn1a B4galt6 Mki67 Lpl Pdgfc Col8a1 Col1a1 Cd53 Sh3pxd2b Col5a2 Has2 Kif11 Tubb6 Hif1a Hbegf Kif20b Igf1 Cideb Bst2 Grn Col3a1 Fscn1 Tspo H2bc3 Rab8b Ccdc80 Smc2 Aurkb Tnfrsf9 Col1a2 Atad2 Ext1 Gja1 Loxl2	miR-29b-3p
GO_cellular_component_organization_or_biogenesis	0.000883829	0.0277775	0.477271	0.450761	1.98717	67	Tnc Ctss Ccna2 Eif2s3y Top2a Fn1 Lox Cdkn1a B4galt6 Mki67 Lpl Pdgfc Col8a1 Col1a1 Cd53 Sh3pxd2b Col5a2 Has2 Kif11 Tubb6 Hif1a Hbegf Kif20b Igf1 Cideb Bst2 Grn Col3a1 Fscn1 Tspo H2bc3 Rab8b Ccdc80 Smc2 Aurkb Tnfrsf9 Col1a2 Atad2 Ext1 Gja1 Loxl2	miR-29b-3p
GO_positive_regulation_of_cellular_process	0.00124256	0.0301711	0.45506	0.443989	1.95465	59	Tnc Ctss Ccna2 Eif2s3y Top2a Fn1 Cdkn1a Lpl Pdgfc Col8a1 Col1a1 Cd53 Sh3pxd2b Has2 Eda2r Hif1a Hbegf Kif20b Eef1e1 Igf1 Il2ra Cideb Ctsc Grn Col3a1 Fscn1 Tspo Emilin2 Rab8b Ccdc80	miR-29b-3p
GO_multicellular_organismal_process	0.000173446	0.0196458	0.518848	0.498798	2.18361	57	Msr1 Chl1 Ccl3 Slc7a11 Serpine1 Hmox1 B4galt6 Cdk1 Ccnb2 Lipa Mmp19 Mmp14 Socs3 Ccn4 Hif1a Fam49b Acp2 Tnf Igf1 Il2ra Plk1 Slc7a5 B4galt5 Glipr2	miR-30d-5p
GO_multicellular_organism_development	0.000526638	0.0196458	0.477271	0.479957	2.09369	48	Chl1 Ccl3 Slc7a11 Serpine1 Hmox1 B4galt6 Cdk1 Ccnb2 Lipa Mmp19 Mmp14 Socs3 Ccn4 Hif1a Acp2 Tnf Igf1 Il2ra Slc7a5 B4galt5 Glipr2	miR-30d-5p
GO_system_development	0.000526638	0.0196458	0.477271	0.479957	2.09369	48	Chl1 Ccl3 Slc7a11 Serpine1 Hmox1 B4galt6 Cdk1 Ccnb2 Lipa Mmp19 Mmp14 Socs3 Ccn4 Hif1a Acp2 Tnf Igf1 Il2ra Slc7a5 B4galt5 Glipr2	miR-30d-5p
GO_cellular_developmental_process	0.00137141	0.0301711	0.45506	0.462646	2.01418	45	Tnc Top2a Fn1 Lox Cdkn1a B4galt6 Lpl Col1a1 Cd53 Ddx3y Sh3pxd2b Col5a2 Has2 Eda2r Hif1a Kif20b Eef1e1 Igf1 Il2ra Fbn1 Grn Col3a1 Tspo	miR-29b-3p
GO_multicellular_organism_development	0.00509379	0.0595545	0.407018	0.509998	1.97245	26	Spp1 Top2a Lrp12 Isg15 Itgb2 Oas2 Ptger4 Ccn4 Psap Igf1	miR-23b-3p
GO_cellular_process	0.111888	0.500071	0.128789	0.660854	1.656	22	B4galt6 Prr11 Has2 Sec24a Nek6 S100b P2ry12 Tgfbr1 Mfsd1 Uck2 Ccn2 Lmnb1	miR-297a-5p
GO_biological_process	0.234765	0.500071	0.0824344	0.641385	1.40853	23	B4galt6 Prr11 Has2 Sec24a Nek6 S100b P2ry12 Tgfbr1 Mfsd1 Uck2 Ccn2 Lmnb1	miR-297a-5p
GO_metabolic_process	0.234765	0.500071	0.0824344	0.411924	1.32369	15	B4galt6 Has2 Sec24a Nek6 S100b Tgfbr1 Uck2 Ccn2 Lmnb1	miR-297a-5p
GO_regulation_of_biological_process	0.400599	0.500071	0.0558265	0.364206	1.11011	18	Prr11 Has2 Sec24a Nek6 S100b P2ry12 Tgfbr1	miR-297a-5p
GO_regulation_of_cellular_process	0.400599	0.500071	0.0558265	0.364206	1.11011	18	Prr11 Has2 Sec24a Nek6 S100b P2ry12 Tgfbr1	miR-297a-5p
GO_cellular_component_organization	0.437562	0.500071	0.0517405	0.325983	1.04752	15	B4galt6 Has2 Sec24a Nek6 P2ry12 Tgfbr1	miR-297a-5p
GO_cellular_component_organization_or_biogenesis	0.437562	0.500071	0.0517405	0.325983	1.04752	15	B4galt6 Has2 Sec24a Nek6 P2ry12 Tgfbr1	miR-297a-5p
GO_biological_regulation	0.552448	0.552448	0.0410713	0.320083	0.942309	19	Prr11 Has2 Sec24a Nek6 S100b P2ry12 Tgfbr1	miR-297a-5p
GO_regulation_of_metabolic_process	0.00323734	0.048523	0.431708	0.492451	1.94179	34	Spp1 Arg1 Top2a Isg15 Itgb2 Oas2 Ptger4 Ccn4 Psap Sec24a Igf1 Rap2b Nek6 Ccnb1 Mastl Sdcbp	miR-23b-3p
GO_regulation_of_developmental_process	0.00122415	0.0301711	0.45506	0.487408	2.04432	33	Fn1 Lox Cdkn1a Lpl Col1a1 Cd53 Sh3pxd2b Col5a2 Has2 Hif1a Kif20b Eef1e1 Igf1 Il2ra Fbn1 Ctsc Grn Col3a1 Tspo	miR-29b-3p
GO_regulation_of_macromolecule_metabolic_process	0.0011137	0.0359169	0.45506	0.525694	2.07664	32	Spp1 Arg1 Top2a Isg15 Itgb2 Oas2 Ptger4 Ccn4 Psap Sec24a Igf1 Rap2b Nek6 Ccnb1 Mastl Sdcbp	miR-23b-3p
GO_cell_communication	0.00102166	0.0359169	0.45506	0.533278	2.1034	31	Spp1 Arg1 Isg15 Itgb2 Oas2 Ptger4 Ccn4 Psap Igf1 Sla Fyb Rap2b Nek6 Bub1 Mastl Sdcbp	miR-23b-3p
GO_signaling	0.00102166	0.0359169	0.45506	0.533278	2.1034	31	Spp1 Arg1 Isg15 Itgb2 Oas2 Ptger4 Ccn4 Psap Igf1 Sla Fyb Rap2b Nek6 Bub1 Mastl Sdcbp	miR-23b-3p
GO_signal_transduction	0.00316334	0.048523	0.431708	0.495105	1.93698	29	Arg1 Isg15 Itgb2 Oas2 Ptger4 Ccn4 Psap Igf1 Sla Fyb Rap2b Nek6 Bub1 Mastl Sdcbp	miR-23b-3p
GO_developmental_process	0.00338533	0.048523	0.431708	0.492403	1.92641	29	Spp1 Top2a Lrp12 Isg15 Itgb2 Oas2 Ptger4 Ccn4 Psap Igf1 Sla	miR-23b-3p
GO_cell_population_proliferation	0.000275696	0.0277775	0.498493	0.54964	2.26985	29	Tnc Ccna2 Fn1 Cdkn1a Mki67 Pdgfc Col8a1 Ifi30 Has2 Hif1a Hbegf Kif20b Eef1e1 Shcbp1 Igf1 Il2ra	miR-29b-3p
GO_cell_death	0.000380504	0.0196458	0.498493	0.552575	2.22237	27	Chl1 Ccl3 Slc7a11 Serpine1 Hmox1 Cdk1 Socs3 Ccn4 Hif1a Acp2 Tnf Igf1 Il2ra Plk1	miR-30d-5p
GO_positive_regulation_of_developmental_process	0.00087467	0.0204673	0.477271	0.533446	2.14544	27	Msr1 Ccl3 Serpine1 Hmox1 Cdk1 Mmp14 Socs3 Ccn4 Hif1a Tnf Igf1 Il2ra B4galt5 Glipr2 Junb Sdcbp	miR-30d-5p
GO_anatomical_structure_development	0.021978	0.463536	0.30775	0.526534	1.87314	16	Ctsk Top2a Cdkn1a Cd53 Hif1a Hbegf E2f8 Il2ra	miR-29c-3p
GO_developmental_process	0.034965	0.463536	0.24134	0.495687	1.77077	17	Ctsk Top2a Cdkn1a Cd53 Hif1a Hbegf E2f8 Il2ra	miR-29c-3p
GO_cellular_component_organization	0.0569431	0.463536	0.186433	0.452055	1.63439	22	Ccna2 Top2a Cdkn1a Cd53 Kif11 Hif1a Hbegf H2bc3 Rab8b Smc2 Aurkb Tnfrsf9 Atad2 Slc16a1 Lif Kif22 Casp3 Tubb5	miR-29c-3p
GO_cellular_component_organization_or_biogenesis	0.0569431	0.463536	0.186433	0.452055	1.63439	22	Ccna2 Top2a Cdkn1a Cd53 Kif11 Hif1a Hbegf H2bc3 Rab8b Smc2 Aurkb Tnfrsf9 Atad2 Slc16a1 Lif Kif22 Casp3 Tubb5	miR-29c-3p
GO_multicellular_organism_development	0.0579421	0.463536	0.184706	0.474203	1.66684	15	Ctsk Top2a Cdkn1a Hif1a Hbegf E2f8 Il2ra	miR-29c-3p
GO_system_development	0.0579421	0.463536	0.184706	0.474203	1.66684	15	Ctsk Top2a Cdkn1a Hif1a Hbegf E2f8 Il2ra	miR-29c-3p
GO_regulation_of_biological_process	0.103896	0.546121	0.134273	0.438872	1.49081	35	Ctsk Ccna2 Top2a Cdkn1a Ifi30 Cd53 Kif11 Hif1a Hbegf Shcbp1 E2f8 Il2ra	miR-29c-3p
GO_cell_cycle	0.122877	0.546121	0.122108	0.430766	1.51415	15	Ccna2 Top2a Cdkn1a Kif11 E2f8 Smc2 Aurkb Lmnb1 Slc16a1 Lif Kif22 Casp3 Tubb5	miR-29c-3p
GO_biological_regulation	0.147852	0.546121	0.109684	0.425192	1.42137	36	Ctsk Ccna2 Top2a Cdkn1a Ifi30 Cd53 Kif11 Hif1a Hbegf Shcbp1 E2f8 Il2ra	miR-29c-3p
GO_cellular_biosynthetic_process	0.158841	0.546121	0.105125	0.403009	1.41659	15	Ccna2 Top2a Cdkn1a Hif1a Hbegf E2f8	miR-29c-3p
GO_programmed_cell_death	0.000599908	0.0196458	0.477271	0.531285	2.12268	26	Chl1 Ccl3 Slc7a11 Serpine1 Hmox1 Cdk1 Socs3 Hif1a Acp2 Tnf Igf1 Il2ra Plk1	miR-30d-5p
GO_regulation_of_cell_population_proliferation	0.000471686	0.0277775	0.498493	0.546701	2.20524	25	Tnc Ccna2 Fn1 Cdkn1a Pdgfc Ifi30 Has2 Hif1a Hbegf Kif20b Eef1e1 Shcbp1 Igf1 Il2ra	miR-29b-3p
GO_immune_system_process	0.000175713	0.022667	0.518848	0.591419	2.26664	24	Spp1 Arg1 Top2a Isg15 Itgb2 Ifi30 Oas2 Ptger4 Ccn4 Igf1 Fyb	miR-23b-3p
GO_regulation_of_cell_death	0.000709813	0.0196458	0.477271	0.553927	2.17041	23	Chl1 Ccl3 Slc7a11 Serpine1 Hmox1 Cdk1 Socs3 Ccn4 Hif1a Tnf Igf1 Plk1	miR-30d-5p
GO_regulation_of_programmed_cell_death	0.000755606	0.0196458	0.477271	0.555581	2.15807	21	Chl1 Ccl3 Slc7a11 Serpine1 Hmox1 Cdk1 Socs3 Hif1a Tnf Igf1 Plk1	miR-30d-5p
GO_regulation_of_apoptotic_process	0.00072813	0.0196458	0.477271	0.574787	2.20793	20	Chl1 Ccl3 Slc7a11 Serpine1 Hmox1 Cdk1 Socs3 Hif1a Tnf Igf1 Plk1	miR-30d-5p
GO_phosphorylation	0.00205341	0.0441484	0.431708	0.57631	2.10624	18	Itgb2 Ptger4 Psap Igf1 Sla Rap2b Dck Nek6 Ccnb1 Bub1 Mastl Sdcbp	miR-23b-3p
GO_positive_regulation_of_cell_population_proliferation	6.48641e-05	0.0142701	0.538434	0.655133	2.43312	16	Tnc Ccna2 Fn1 Cdkn1a Pdgfc Has2 Hif1a Hbegf Kif20b Igf1 Il2ra Grn Tspo	miR-29b-3p
GO_secretion	0.00190542	0.0441484	0.45506	0.623676	2.2084	15	Spp1 Isg15 Itgb2 Oas2 Ptger4 Ccn4 Sec24a Igf1	miR-23b-3p
GO_inflammatory_response	0.000207455	0.0196458	0.518848	0.653606	2.3769	15	Ccl3 Serpine1 Hmox1 Lipa Socs3 Ccn4 Hif1a Tnf Igf1 Il2ra	miR-30d-5p
GO_biological_regulation	0.755245	1	0.0259736	0.26684	0.626503	15	Rpf2 Lypla1 Slc7a14 Ttk Rad18 Slc30a4 F10 Arpc4 Aurkb Rab8b Kif23 Hif1a Kif11 Ube2c Col8a1	miR-5101
GO_regulation_of_biological_process	0.755245	1	0.0259736	0.26684	0.626503	15	Rpf2 Lypla1 Slc7a14 Ttk Rad18 Slc30a4 F10 Arpc4 Aurkb Rab8b Kif23 Hif1a Kif11 Ube2c Col8a1	miR-5101
GO_regulation_of_cellular_process	0.755245	1	0.0259736	0.26684	0.626503	15	Rpf2 Lypla1 Slc7a14 Ttk Rad18 Slc30a4 F10 Arpc4 Aurkb Rab8b Kif23 Hif1a Kif11 Ube2c Col8a1	miR-5101
GO_cellular_process	0.813187	1	0.0218679	0.230225	0.484807	16	Rpf2 Lypla1 Slc7a14 Ttk Rad18 Slc30a4 F10 Arpc4 Mthfd2 Aurkb Rab8b Kif23 Hif1a Kif11 Ube2c Col8a1	miR-5101
